# Supplementary material
Source: PubMed Central journal article supplement (PMC8654641)
Supplement: mmc1.pdf [file mmc1.pdf]

**We gratefully acknowledge the following Authors from the Originating laboratories responsible for obtaining the specimens and the Submitting laboratories where genetic sequence data were generated and shared via the GISAID Initiative, on which this research is based.**

| <b>Accession No.</b> | <b>Originating Lab</b>                                   | <b>Submitting Lab</b>                                                                    | <b>Authors</b>         |
|----------------------|----------------------------------------------------------|------------------------------------------------------------------------------------------|------------------------|
| EPI_ISL_1000998      | Bundeswehr Institute of Microbiology                     | Bundeswehr Institute of Microbiology                                                     | Markus Antwerpen et al |
| EPI_ISL_1000999      | Bundeswehr Institute of Microbiology                     | Bundeswehr Institute of Microbiology                                                     | Markus Antwerpen et al |
| EPI_ISL_1001000      | Bundeswehr Institute of Microbiology                     | Bundeswehr Institute of Microbiology                                                     | Markus Antwerpen et al |
| EPI_ISL_1001001      | Bundeswehr Institute of Microbiology                     | Bundeswehr Institute of Microbiology                                                     | Markus Antwerpen et al |
| EPI_ISL_1001002      | Bundeswehr Institute of Microbiology                     | Bundeswehr Institute of Microbiology                                                     | Markus Antwerpen et al |
| EPI_ISL_1001003      | Bundeswehr Institute of Microbiology                     | Bundeswehr Institute of Microbiology                                                     | Markus Antwerpen et al |
| EPI_ISL_1001004      | Bundeswehr Institute of Microbiology                     | Bundeswehr Institute of Microbiology                                                     | Markus Antwerpen et al |
| EPI_ISL_1000994      | Bundeswehr Institute of Microbiology                     | Bundeswehr Institute of Microbiology                                                     | Markus Antwerpen et al |
| EPI_ISL_1000995      | Bundeswehr Institute of Microbiology                     | Bundeswehr Institute of Microbiology                                                     | Markus Antwerpen et al |
| EPI_ISL_1000996      | Bundeswehr Institute of Microbiology                     | Bundeswehr Institute of Microbiology                                                     | Markus Antwerpen et al |
| EPI_ISL_1000997      | Bundeswehr Institute of Microbiology                     | Bundeswehr Institute of Microbiology                                                     | Markus Antwerpen et al |
| EPI_ISL_815257       | Centogene                                                | Centogene                                                                                | Peter Bauer et al      |
| EPI_ISL_418241       | NIC Viral Respiratory Unit - Institut Pasteur of Algeria | National Reference Center for Viruses of Respiratory Infections, Institut Pasteur, Paris | Mélanie Albert et al   |
| EPI_ISL_418242       | NIC Viral Respiratory Unit - Institut Pasteur of Algeria | National Reference Center for Viruses of Respiratory Infections, Institut Pasteur, Paris | Mélanie Albert et al   |
| EPI_ISL_420037       | NIC Viral Respiratory Unit - Institut Pasteur of Algeria | National Reference Center for Viruses of Respiratory Infections, Institut Pasteur, Paris | Mélanie Albert et al   |
| EPI_ISL_766869       | NIC Viral Respiratory Unit - Institut Pasteur of Algeria | National Reference Center for Viruses of Respiratory Infections, Institut Pasteur, Paris | Mélanie Albert et al   |
| EPI_ISL_766870       | NIC Viral Respiratory Unit - Institut Pasteur of Algeria | National Reference Center for Viruses of Respiratory Infections, Institut Pasteur, Paris | Mélanie Albert et al   |
| EPI_ISL_766864       | NIC Viral Respiratory Unit - Institut Pasteur of Algeria | National Reference Center for Viruses of Respiratory Infections, Institut Pasteur, Paris | Mélanie Albert et al   |
| EPI_ISL_766867       | NIC Viral Respiratory Unit - Institut Pasteur of Algeria | National Reference Center for Viruses of Respiratory Infections, Institut Pasteur, Paris | Mélanie Albert et al   |
| EPI_ISL_766875       | NIC Viral Respiratory Unit - Institut Pasteur of Algeria | National Reference Center for Viruses of Respiratory Infections, Institut Pasteur, Paris | Mélanie Albert et al   |
| EPI_ISL_766863       | NIC Viral Respiratory Unit - Institut Pasteur of Algeria | National Reference Center for Viruses of Respiratory Infections, Institut Pasteur, Paris | Mélanie Albert et al   |
| EPI_ISL_766872       | NIC Viral Respiratory Unit - Institut Pasteur of Algeria | National Reference Center for Viruses of Respiratory Infections, Institut Pasteur, Paris | Mélanie Albert et al   |
| EPI_ISL_766865       | NIC Viral Respiratory Unit - Institut Pasteur of Algeria | National Reference Center for Viruses of Respiratory Infections, Institut Pasteur, Paris | Mélanie Albert et al   |
| EPI_ISL_766871       | NIC Viral Respiratory Unit - Institut Pasteur of Algeria | National Reference Center for Viruses of Respiratory Infections, Institut Pasteur, Paris | Mélanie Albert et al   |
| EPI_ISL_766866       | NIC Viral Respiratory Unit - Institut Pasteur of Algeria | National Reference Center for Viruses of Respiratory Infections, Institut Pasteur, Paris | Mélanie Albert et al   |
| EPI_ISL_766873       | NIC Viral Respiratory Unit - Institut Pasteur of Algeria | National Reference Center for Viruses of Respiratory Infections, Institut Pasteur, Paris | Mélanie Albert et al   |
| EPI_ISL_766861       | NIC Viral Respiratory Unit - Institut Pasteur of Algeria | National Reference Center for Viruses of Respiratory Infections, Institut Pasteur, Paris | Mélanie Albert et al   |







|                |                                                                                              |                                                                                                                                                                                                                      |                    |
|----------------|----------------------------------------------------------------------------------------------|----------------------------------------------------------------------------------------------------------------------------------------------------------------------------------------------------------------------|--------------------|
| EPI_ISL_792324 | Instituto de Investigaciones Biomédicas en Retrovirus y SIDA                                 | Área de Secuenciación del Laboratorio de Virología del Hospital de Niños Dr. Ricardo Gutierrez on behalf of 'Proyecto Argentino Interinstitucional de genómica de SARS-CoV-2' (PAIS Consorcio)                       | Nabaes Jodar et al |
| EPI_ISL_792325 | Instituto de Investigaciones Biomédicas en Retrovirus y SIDA                                 | Área de Secuenciación del Laboratorio de Virología del Hospital de Niños Dr. Ricardo Gutierrez on behalf of 'Proyecto Argentino Interinstitucional de genómica de SARS-CoV-2' (PAIS Consorcio)                       | Nabaes Jodar et al |
| EPI_ISL_792339 | Laboratorio del Hospital Interzonal General de Agudos Evita                                  | Área de Secuenciación del Laboratorio de Virología del Hospital de Niños Dr. Ricardo Gutierrez on behalf of 'Proyecto Argentino Interinstitucional de genómica de SARS-CoV-2' (PAIS Consorcio)                       | Nabaes Jodar et al |
| EPI_ISL_792343 | Laboratorio del Hospital Interzonal General de Agudos Evita                                  | Área de Secuenciación del Laboratorio de Virología del Hospital de Niños Dr. Ricardo Gutierrez on behalf of 'Proyecto Argentino Interinstitucional de genómica de SARS-CoV-2' (PAIS Consorcio)                       | Nabaes Jodar et al |
| EPI_ISL_792377 | Laboratorio de salud pública, Facultad de Ciencias Exactas, Universidad Nacional de La Plata | Área de Secuenciación del Laboratorio de Virología del Hospital de Niños Dr. Ricardo Gutierrez on behalf of 'Proyecto Argentino Interinstitucional de genómica de SARS-CoV-2' (PAIS Consorcio)                       | Nabaes Jodar et al |
| EPI_ISL_792383 | Laboratorio de salud pública, Facultad de Ciencias Exactas, Universidad Nacional de La Plata | Área de Secuenciación del Laboratorio de Virología del Hospital de Niños Dr. Ricardo Gutierrez on behalf of 'Proyecto Argentino Interinstitucional de genómica de SARS-CoV-2' (PAIS Consorcio)                       | Nabaes Jodar et al |
| EPI_ISL_792393 | Plataforma de Servicios Biotecnológicos: UTTIPP/PSB , Universidad Nacional de Quilmes.       | Área de Secuenciación del Laboratorio de Virología del Hospital de Niños Dr. Ricardo Gutierrez on behalf of 'Proyecto Argentino Interinstitucional de genómica de SARS-CoV-2' (PAIS Consorcio)                       | Nabaes Jodar et al |
| EPI_ISL_792394 | Plataforma de Servicios Biotecnológicos: UTTIPP/PSB , Universidad Nacional de Quilmes.       | Área de Secuenciación del Laboratorio de Virología del Hospital de Niños Dr. Ricardo Gutierrez on behalf of 'Proyecto Argentino Interinstitucional de genómica de SARS-CoV-2' (PAIS Consorcio)                       | Nabaes Jodar et al |
| EPI_ISL_792451 | Laboratorio del Hospital Regional Ushuaia Gdor. Ernesto Campos                               | Hospital Regional Ushuaia - Centro Austral De Investigaciones Científicas - Universidad Nacional De Tierra Del Fuego on behalf of 'Proyecto Argentino Interinstitucional de genómica de SARS-CoV-2' (PAIS Consorcio) | Ceballos et al     |
| EPI_ISL_792452 | Laboratorio del Hospital Regional Ushuaia Gdor. Ernesto Campos                               | Hospital Regional Ushuaia - Centro Austral De Investigaciones Científicas - Universidad Nacional De Tierra Del Fuego on behalf of 'Proyecto Argentino Interinstitucional de genómica de SARS-CoV-2' (PAIS Consorcio) | Ceballos et al     |
| EPI_ISL_792454 | Laboratorio del Hospital Regional Ushuaia Gdor. Ernesto Campos                               | Hospital Regional Ushuaia - Centro Austral De Investigaciones Científicas - Universidad Nacional De Tierra Del Fuego on behalf of 'Proyecto Argentino Interinstitucional de genómica de SARS-CoV-2' (PAIS Consorcio) | Ceballos et al     |
| EPI_ISL_792459 | Laboratorio del Hospital Regional Ushuaia Gdor. Ernesto Campos                               | Hospital Regional Ushuaia - Centro Austral De Investigaciones Científicas - Universidad Nacional De Tierra Del Fuego on behalf of 'Proyecto Argentino Interinstitucional de genómica de SARS-CoV-2' (PAIS Consorcio) | Ceballos et al     |
| EPI_ISL_792461 | Laboratorio del Hospital Regional Ushuaia Gdor. Ernesto Campos                               | Hospital Regional Ushuaia - Centro Austral De Investigaciones Científicas - Universidad Nacional De Tierra Del Fuego on behalf of 'Proyecto Argentino Interinstitucional de genómica de SARS-CoV-2' (PAIS Consorcio) | Ceballos et al     |
| EPI_ISL_792463 | Laboratorio del Hospital Regional Ushuaia Gdor. Ernesto Campos                               | Hospital Regional Ushuaia - Centro Austral De Investigaciones Científicas - Universidad Nacional De Tierra Del Fuego on behalf of 'Proyecto Argentino Interinstitucional de genómica de SARS-CoV-2' (PAIS Consorcio) | Ceballos et al     |
| EPI_ISL_792469 | Laboratorio del Hospital Regional Ushuaia Gdor. Ernesto Campos                               | Hospital Regional Ushuaia - Centro Austral De Investigaciones Científicas - Universidad Nacional De Tierra Del Fuego on behalf of 'Proyecto Argentino Interinstitucional de genómica de SARS-CoV-2' (PAIS Consorcio) | Ceballos et al     |
| EPI_ISL_792486 | Laboratorio Central Mg. Luis Alfredo Pianciola                                               | Área de Secuenciación del Laboratorio de Virología del Hospital de Niños Dr. Ricardo Gutierrez on behalf of 'Proyecto Argentino Interinstitucional de genómica de SARS-CoV-2' (PAIS Consorcio)                       | Ceballos et al     |
| EPI_ISL_792511 | Laboratorio de Inmunología del Hospital Perrando e Instituto de Medicina Regional de la UNNE | Departamento de Informática del Instituto de Investigación de la Cadena Láctea CONICET-INTA on behalf of 'Proyecto Argentino Interinstitucional de genómica de SARS-CoV-2' (PAIS Consortium)                         | Eberhardt et al    |

|                |                                                                      |                                                                                                                                                                                                     |                   |
|----------------|----------------------------------------------------------------------|-----------------------------------------------------------------------------------------------------------------------------------------------------------------------------------------------------|-------------------|
| EPI_ISL_792516 | Laboratorio Central de la Ciudad de Santa Fe                         | Grupo de Genómica y Bioinformática del Instituto de Investigación de la Cadena Láctea CONICET-INTA on behalf of 'Proyecto Argentino Interinstitucional de genómica de SARS-CoV-2' (PAIS Consortium) | Eberhardt et al   |
| EPI_ISL_792517 | Laboratorio Central de la Ciudad de Santa Fe                         | Grupo de Genómica y Bioinformática del Instituto de Investigación de la Cadena Láctea CONICET-INTA on behalf of 'Proyecto Argentino Interinstitucional de genómica de SARS-CoV-2' (PAIS Consortium) | Eberhardt et al   |
| EPI_ISL_792519 | Laboratorio Central de la Ciudad de Santa Fe                         | Grupo de Genómica y Bioinformática del Instituto de Investigación de la Cadena Láctea CONICET-INTA on behalf of 'Proyecto Argentino Interinstitucional de genómica de SARS-CoV-2' (PAIS Consortium) | Eberhardt et al   |
| EPI_ISL_792522 | Laboratorio de Virología del Hospital de Niños Dr. Ricardo Gutierrez | Grupo de Genómica y Bioinformática del Instituto de Investigación de la Cadena Láctea CONICET-INTA on behalf of 'Proyecto Argentino Interinstitucional de genómica de SARS-CoV-2' (PAIS Consortium) | Amadio et al      |
| EPI_ISL_792523 | Laboratorio de Virología del Hospital de Niños Dr. Ricardo Gutierrez | Grupo de Genómica y Bioinformática del Instituto de Investigación de la Cadena Láctea CONICET-INTA on behalf of 'Proyecto Argentino Interinstitucional de genómica de SARS-CoV-2' (PAIS Consortium) | Amadio et al      |
| EPI_ISL_792524 | Laboratorio de Virología del Hospital de Niños Dr. Ricardo Gutierrez | Grupo de Genómica y Bioinformática del Instituto de Investigación de la Cadena Láctea CONICET-INTA on behalf of 'Proyecto Argentino Interinstitucional de genómica de SARS-CoV-2' (PAIS Consortium) | Amadio et al      |
| EPI_ISL_792525 | Laboratorio del Hospital Interzonal General de Agudos Evita          | Laboratorio Central de la Ciudad de Santa Fe                                                                                                                                                        | Amadio et al      |
| EPI_ISL_964906 | Hospital Castro Rendon                                               | Laboratorio Central de la Ciudad de Santa Fe                                                                                                                                                        | L Pianciola et al |
| EPI_ISL_964907 | Hospital Zapala                                                      | Laboratorio Central de la Ciudad de Santa Fe                                                                                                                                                        | L Pianciola et al |
| EPI_ISL_964909 | Hospital Bouquet Roldan                                              | Laboratorio Central de la Ciudad de Santa Fe                                                                                                                                                        | L Pianciola et al |
| EPI_ISL_964910 | CMIC                                                                 | Laboratorio Central de la Ciudad de Santa Fe                                                                                                                                                        | L Pianciola et al |
| EPI_ISL_964913 | Sistema de Emergencias                                               | Laboratorio Central de la Ciudad de Santa Fe                                                                                                                                                        | L Pianciola et al |
| EPI_ISL_964914 | Hospital Zapala                                                      | Laboratorio Central de la Ciudad de Santa Fe                                                                                                                                                        | L Pianciola et al |
| EPI_ISL_981033 | hospital Cipolletti                                                  | Laboratorio Central de la Ciudad de Santa Fe                                                                                                                                                        | L Pianciola et al |
| EPI_ISL_981037 | Hospital Dr. Francisco López Lima                                    | Laboratorio Central de la Ciudad de Santa Fe                                                                                                                                                        | L Pianciola et al |
| EPI_ISL_981038 | Hospital Bariloche                                                   | Laboratorio Central de la Ciudad de Santa Fe                                                                                                                                                        | L Pianciola et al |
| EPI_ISL_981040 | Hospital Privado Regional                                            | Laboratorio Central de la Ciudad de Santa Fe                                                                                                                                                        | L Pianciola et al |
| EPI_ISL_981042 | Hospital Bariloche                                                   | Laboratorio Central de la Ciudad de Santa Fe                                                                                                                                                        | L Pianciola et al |
| EPI_ISL_981043 | Hospital Bariloche                                                   | Laboratorio Central de la Ciudad de Santa Fe                                                                                                                                                        | L Pianciola et al |
| EPI_ISL_981044 | Hospital Bariloche                                                   | Laboratorio Central de la Ciudad de Santa Fe                                                                                                                                                        | L Pianciola et al |
| EPI_ISL_981045 | Hospital Bariloche                                                   | Laboratorio Central de la Ciudad de Santa Fe                                                                                                                                                        | L Pianciola et al |
| EPI_ISL_981047 | Hospital Jacobacci                                                   | Laboratorio Central de la Ciudad de Santa Fe                                                                                                                                                        | L Pianciola et al |

|                |                                                  |                                                                                                                                                 |                        |
|----------------|--------------------------------------------------|-------------------------------------------------------------------------------------------------------------------------------------------------|------------------------|
| EPI_ISL_981048 | Hospital Viedma                                  | Laboratorio Central Mg. Luis Alfredo Pianciola on behalf of 'Proyecto Argentino Interinstitucional de genómica de SARS-CoV-2' (PAIS Consortium) | L Pianciola et al      |
| EPI_ISL_981049 | Hospital Viedma                                  | Laboratorio Central Mg. Luis Alfredo Pianciola on behalf of 'Proyecto Argentino Interinstitucional de genómica de SARS-CoV-2' (PAIS Consortium) | L Pianciola et al      |
| EPI_ISL_981052 | Hospital Dr. Francisco López Lima                | Laboratorio Central Mg. Luis Alfredo Pianciola on behalf of 'Proyecto Argentino Interinstitucional de genómica de SARS-CoV-2' (PAIS Consortium) | L Pianciola et al      |
| EPI_ISL_981053 | Hospital Dr. Francisco López Lima                | Laboratorio Central Mg. Luis Alfredo Pianciola on behalf of 'Proyecto Argentino Interinstitucional de genómica de SARS-CoV-2' (PAIS Consortium) | L Pianciola et al      |
| EPI_ISL_981054 | Hospital Viedma                                  | Laboratorio Central Mg. Luis Alfredo Pianciola on behalf of 'Proyecto Argentino Interinstitucional de genómica de SARS-CoV-2' (PAIS Consortium) | L Pianciola et al      |
| EPI_ISL_981055 | Hospital Catriel                                 | Laboratorio Central Mg. Luis Alfredo Pianciola on behalf of 'Proyecto Argentino Interinstitucional de genómica de SARS-CoV-2' (PAIS Consortium) | L Pianciola et al      |
| EPI_ISL_981056 | Hospital Viedma                                  | Instituto de Patología Vegetal (CIAP-INTA) on behalf of 'Proyecto Argentino Interinstitucional de genómica de SARS-CoV-2' (PAIS Consortium)     | L Pianciola et al      |
| EPI_ISL_792531 | Laboratorio Central, Ministerio de Salud Córdoba | Instituto de Patología Vegetal (CIAP-INTA) on behalf of 'Proyecto Argentino Interinstitucional de genómica de SARS-CoV-2' (PAIS Consortium)     | Fernández et al        |
| EPI_ISL_792532 | Laboratorio Central, Ministerio de Salud Córdoba | Instituto de Patología Vegetal (CIAP-INTA) on behalf of 'Proyecto Argentino Interinstitucional de genómica de SARS-CoV-2' (PAIS Consortium)     | Fernández et al        |
| EPI_ISL_792533 | Laboratorio Central, Ministerio de Salud Córdoba | Instituto de Patología Vegetal (CIAP-INTA) on behalf of 'Proyecto Argentino Interinstitucional de genómica de SARS-CoV-2' (PAIS Consortium)     | Fernández et al        |
| EPI_ISL_792534 | Laboratorio Central, Ministerio de Salud Córdoba | Instituto de Patología Vegetal (CIAP-INTA) on behalf of 'Proyecto Argentino Interinstitucional de genómica de SARS-CoV-2' (PAIS Consortium)     | Fernández et al        |
| EPI_ISL_792537 | Laboratorio Central, Ministerio de Salud Córdoba | Instituto de Patología Vegetal (CIAP-INTA) on behalf of 'Proyecto Argentino Interinstitucional de genómica de SARS-CoV-2' (PAIS Consortium)     | Fernández et al        |
| EPI_ISL_792539 | Laboratorio Central, Ministerio de Salud Córdoba | Instituto de Patología Vegetal (CIAP-INTA) on behalf of 'Proyecto Argentino Interinstitucional de genómica de SARS-CoV-2' (PAIS Consortium)     | Fernández et al        |
| EPI_ISL_792544 | Laboratorio Central, Ministerio de Salud Córdoba | Instituto de Patología Vegetal (CIAP-INTA) on behalf of 'Proyecto Argentino Interinstitucional de genómica de SARS-CoV-2' (PAIS Consortium)     | Fernández et al        |
| EPI_ISL_792545 | Laboratorio Central, Ministerio de Salud Córdoba | Instituto de Patología Vegetal (CIAP-INTA) on behalf of 'Proyecto Argentino Interinstitucional de genómica de SARS-CoV-2' (PAIS Consortium)     | Fernández et al        |
| EPI_ISL_792546 | Laboratorio Central, Ministerio de Salud Córdoba | Instituto de Patología Vegetal (CIAP-INTA) on behalf of 'Proyecto Argentino Interinstitucional de genómica de SARS-CoV-2' (PAIS Consortium)     | Fernández et al        |
| EPI_ISL_648677 | INBIRS-UBA                                       | Laboratorio Mixto de Biotecnología Acuática (LMBA)                                                                                              | Joaquín Ezpeleta et al |
| EPI_ISL_648213 | INBIRS-UBA                                       | Laboratorio Mixto de Biotecnología Acuática (LMBA)                                                                                              | Joaquín Ezpeleta et al |
| EPI_ISL_648217 | SILAB                                            | Laboratorio Mixto de Biotecnología Acuática (LMBA)                                                                                              | Joaquín Ezpeleta et al |
| EPI_ISL_648215 | INBIRS-UBA                                       | Laboratorio Mixto de Biotecnología Acuática (LMBA)                                                                                              | Joaquín Ezpeleta et al |
| EPI_ISL_648216 | INBIRS-UBA                                       | Laboratorio Mixto de Biotecnología Acuática (LMBA)                                                                                              | Joaquín Ezpeleta et al |
| EPI_ISL_648210 | INBIRS-UBA                                       | Laboratorio Mixto de Biotecnología Acuática (LMBA)                                                                                              | Joaquín Ezpeleta et al |
| EPI_ISL_648209 | INBIRS-UBA                                       | Laboratorio Mixto de Biotecnología Acuática (LMBA)                                                                                              | Joaquín Ezpeleta et al |
| EPI_ISL_648218 | INBIRS-UBA                                       | Laboratorio Mixto de Biotecnología Acuática (LMBA)                                                                                              | Joaquín Ezpeleta et al |
| EPI_ISL_648212 | INBIRS-UBA                                       | Laboratorio Mixto de Biotecnología Acuática (LMBA)                                                                                              | Joaquín Ezpeleta et al |
| EPI_ISL_648214 | INBIRS-UBA                                       | Laboratorio Mixto de Biotecnología Acuática (LMBA)                                                                                              | Joaquín Ezpeleta et al |
| EPI_ISL_547445 | Dutch COVID-19 response team                     | National Institute for Public Health and the Environment (RIVM)                                                                                 | Adam Meijer et al      |
| EPI_ISL_547446 | Dutch COVID-19 response team                     | National Institute for Public Health and the Environment (RIVM)                                                                                 | Adam Meijer et al      |
| EPI_ISL_547447 | Dutch COVID-19 response team                     | National Institute for Public Health and the Environment (RIVM)                                                                                 | Adam Meijer et al      |
| EPI_ISL_547448 | Dutch COVID-19 response team                     | National Institute for Public Health and the Environment (RIVM)                                                                                 | Adam Meijer et al      |
| EPI_ISL_547449 | Dutch COVID-19 response team                     | National Institute for Public Health and the Environment (RIVM)                                                                                 | Adam Meijer et al      |

|                |                                                                                 |                                                                                                                                                                                           |                      |
|----------------|---------------------------------------------------------------------------------|-------------------------------------------------------------------------------------------------------------------------------------------------------------------------------------------|----------------------|
| EPI_ISL_636513 | Dutch COVID-19 response team                                                    | National Institute for Public Health and the Environment (RIVM)                                                                                                                           | Adam Meijer et al    |
| EPI_ISL_636514 | Dutch COVID-19 response team                                                    | National Institute for Public Health and the Environment (RIVM)                                                                                                                           | Adam Meijer et al    |
| EPI_ISL_636515 | Dutch COVID-19 response team                                                    | National Institute for Public Health and the Environment (RIVM)                                                                                                                           | Adam Meijer et al    |
| EPI_ISL_636516 | Dutch COVID-19 response team                                                    | National Institute for Public Health and the Environment (RIVM)                                                                                                                           | Adam Meijer et al    |
| EPI_ISL_636517 | Dutch COVID-19 response team                                                    | National Institute for Public Health and the Environment (RIVM)                                                                                                                           | Adam Meijer et al    |
| EPI_ISL_636518 | Dutch COVID-19 response team                                                    | National Institute for Public Health and the Environment (RIVM)                                                                                                                           | Adam Meijer et al    |
| EPI_ISL_905239 | Dutch COVID-19 response team                                                    | National Institute for Public Health and the Environment (RIVM)                                                                                                                           | Adam Meijer et al    |
| EPI_ISL_905171 | Dutch COVID-19 response team                                                    | National Institute for Public Health and the Environment (RIVM)                                                                                                                           | Adam Meijer et al    |
| EPI_ISL_905240 | Dutch COVID-19 response team                                                    | National Institute for Public Health and the Environment (RIVM)                                                                                                                           | Adam Meijer et al    |
| EPI_ISL_905241 | Dutch COVID-19 response team                                                    | National Institute for Public Health and the Environment (RIVM)                                                                                                                           | Adam Meijer et al    |
| EPI_ISL_905242 | Dutch COVID-19 response team                                                    | National Institute for Public Health and the Environment (RIVM)                                                                                                                           | Adam Meijer et al    |
| EPI_ISL_904760 | Dutch COVID-19 response team                                                    | National Institute for Public Health and the Environment (RIVM)                                                                                                                           | Adam Meijer et al    |
| EPI_ISL_904761 | Dutch COVID-19 response team                                                    | National Institute for Public Health and the Environment (RIVM)                                                                                                                           | Adam Meijer et al    |
| EPI_ISL_904762 | Dutch COVID-19 response team                                                    | National Institute for Public Health and the Environment (RIVM)                                                                                                                           | Adam Meijer et al    |
| EPI_ISL_407893 | Centre for Infectious Diseases and Microbiology Laboratory Services             | NSW Health Pathology - Institute of Clinical Pathology and Medical Research; Westmead Hospital; University of Sydney                                                                      | Eden J-S et al       |
| EPI_ISL_408976 | Centre for Infectious Diseases and Microbiology Laboratory Services             | NSW Health Pathology - Institute of Clinical Pathology and Medical Research; Westmead Hospital; University of Sydney                                                                      | Rockett R et al      |
| EPI_ISL_408977 | Serology, Virology and OTDS Laboratories (SAViD), NSW Health Pathology Randwick | NSW Health Pathology - Institute of Clinical Pathology and Medical Research; Centre for Infectious Diseases and Microbiology Laboratory Services; Westmead Hospital; University of Sydney | Eden J-S et al       |
| EPI_ISL_413214 | Centre for Infectious Diseases and Microbiology Laboratory Services             | NSW Health Pathology - Institute of Clinical Pathology and Medical Research; Westmead Hospital; University of Sydney                                                                      | Eden J-S et al       |
| EPI_ISL_413594 | Centre for Infectious Diseases and Microbiology Laboratory Services             | NSW Health Pathology - Institute of Clinical Pathology and Medical Research; Westmead Hospital; University of Sydney                                                                      | Rockett R et al      |
| EPI_ISL_413596 | Centre for Infectious Diseases and Microbiology - Public Health                 | NSW Health Pathology - Institute of Clinical Pathology and Medical Research; Westmead Hospital; University of Sydney                                                                      | Rockett R et al      |
| EPI_ISL_593687 | South Eastern Area Laboratory Services (SEALS)                                  | NSW Health Pathology - Institute of Clinical Pathology and Medical Research; Westmead Hospital; University of Sydney                                                                      | CIDM-PH et al. et al |
| EPI_ISL_593698 | South Eastern Area Laboratory Services (SEALS)                                  | NSW Health Pathology - Institute of Clinical Pathology and Medical Research; Westmead Hospital; University of Sydney                                                                      | CIDM-PH et al. et al |
| EPI_ISL_593711 | South Eastern Area Laboratory Services (SEALS)                                  | NSW Health Pathology - Institute of Clinical Pathology and Medical Research; Westmead Hospital; University of Sydney                                                                      | CIDM-PH et al. et al |
| EPI_ISL_593714 | South Eastern Area Laboratory Services (SEALS)                                  | NSW Health Pathology - Institute of Clinical Pathology and Medical Research; Westmead Hospital; University of Sydney                                                                      | CIDM-PH et al. et al |
| EPI_ISL_593725 | South Eastern Area Laboratory Services (SEALS)                                  | NSW Health Pathology - Institute of Clinical Pathology and Medical Research; Westmead Hospital; University of Sydney                                                                      | CIDM-PH et al. et al |
| EPI_ISL_593729 | South Eastern Area Laboratory Services (SEALS)                                  | NSW Health Pathology - Institute of Clinical Pathology and Medical Research; Westmead Hospital; University of Sydney                                                                      | CIDM-PH et al. et al |
| EPI_ISL_593731 | South Eastern Area Laboratory Services (SEALS)                                  | NSW Health Pathology - Institute of Clinical Pathology and Medical Research; Westmead Hospital; University of Sydney                                                                      | CIDM-PH et al. et al |
| EPI_ISL_593734 | South Eastern Area Laboratory Services (SEALS)                                  | NSW Health Pathology - Institute of Clinical Pathology and Medical Research; Westmead Hospital; University of Sydney                                                                      | CIDM-PH et al. et al |
| EPI_ISL_593748 | South Eastern Area Laboratory Services (SEALS)                                  | NSW Health Pathology - Institute of Clinical Pathology and Medical Research; Westmead Hospital; University of Sydney                                                                      | CIDM-PH et al. et al |
| EPI_ISL_593751 | South Eastern Area Laboratory Services (SEALS)                                  | NSW Health Pathology - Institute of Clinical Pathology and Medical Research; Westmead Hospital; University of Sydney                                                                      | CIDM-PH et al. et al |



|                |                                                                                                            |                                                                                                                      |                      |
|----------------|------------------------------------------------------------------------------------------------------------|----------------------------------------------------------------------------------------------------------------------|----------------------|
| EPI_ISL_593753 | South Eastern Area Laboratory Services (SEALS)                                                             | NSW Health Pathology - Institute of Clinical Pathology and Medical Research; Westmead Hospital; University of Sydney | CIDM-PH et al. et al |
| EPI_ISL_639738 | South Eastern Area Laboratory Services (SEALS)                                                             | NSW Health Pathology - Institute of Clinical Pathology and Medical Research; Westmead Hospital; University of Sydney | CIDM-PH et al. et al |
| EPI_ISL_667781 | South Eastern Area Laboratory Services (SEALS)                                                             | NSW Health Pathology - Institute of Clinical Pathology and Medical Research; Westmead Hospital; University of Sydney | CIDM-PH et al. et al |
| EPI_ISL_667796 | South Eastern Area Laboratory Services (SEALS)                                                             | NSW Health Pathology - Institute of Clinical Pathology and Medical Research; Westmead Hospital; University of Sydney | CIDM-PH et al. et al |
| EPI_ISL_708798 | Sydney South West Pathology Service (SSWPS) - Royal Prince Alfred Hospital - NSW Health Pathology          | NSW Health Pathology - Institute of Clinical Pathology and Medical Research; Westmead Hospital; University of Sydney | CIDM-PH et al. et al |
| EPI_ISL_767859 | Sydney South West Pathology Service (SSWPS) - Royal Prince Alfred Hospital - NSW Health Pathology          | NSW Health Pathology - Institute of Clinical Pathology and Medical Research; Westmead Hospital; University of Sydney | CIDM-PH et al. et al |
| EPI_ISL_767860 | Sydney South West Pathology Service (SSWPS) - Royal Prince Alfred Hospital - NSW Health Pathology          | NSW Health Pathology - Institute of Clinical Pathology and Medical Research; Westmead Hospital; University of Sydney | CIDM-PH et al. et al |
| EPI_ISL_779401 | South Eastern Area Laboratory Services (SEALS)                                                             | NSW Health Pathology - Institute of Clinical Pathology and Medical Research; Westmead Hospital; University of Sydney | CIDM-PH et al. et al |
| EPI_ISL_779402 | South Eastern Area Laboratory Services (SEALS)                                                             | NSW Health Pathology - Institute of Clinical Pathology and Medical Research; Westmead Hospital; University of Sydney | CIDM-PH et al. et al |
| EPI_ISL_806726 | 4Cyte Pathology                                                                                            | NSW Health Pathology - Institute of Clinical Pathology and Medical Research; Westmead Hospital; University of Sydney | CIDM-PH et al. et al |
| EPI_ISL_845794 | South Eastern Area Laboratory Services (SEALS)                                                             | NSW Health Pathology - Institute of Clinical Pathology and Medical Research; Westmead Hospital; University of Sydney | CIDM-PH et al. et al |
| EPI_ISL_872587 | Sydney South West Pathology Service (SSWPS) - Royal Prince Alfred Hospital - NSW Health Pathology          | NSW Health Pathology - Institute of Clinical Pathology and Medical Research; Westmead Hospital; University of Sydney | CIDM-PH et al. et al |
| EPI_ISL_509500 | Area of Virology, Serology and Virology Division (SAViD), New South Wales Health Pathology Randwick        | Area of Virology, Serology and Virology Division (SAViD), New South Wales Health Pathology Randwick                  | Rawlinson et al      |
| EPI_ISL_509505 | Area of Virology, Serology and Virology Division (SAViD), New South Wales Health Pathology Randwick        | Area of Virology, Serology and Virology Division (SAViD), New South Wales Health Pathology Randwick                  | Rawlinson et al      |
| EPI_ISL_427643 | Centre for Infectious Diseases and Microbiology Public Health                                              | NSW Health Pathology - Institute of Clinical Pathology and Medical Research; Westmead Hospital; University of Sydney | Timms V et al        |
| EPI_ISL_527012 | Area of Virology, Serology and Virology Division (SAViD), New South Wales Health Pathology Randwick        | Area of Virology, Serology and Virology Division (SAViD), New South Wales Health Pathology Randwick                  | Rawlinson et al      |
| EPI_ISL_678320 | Area of Virology, Serology and Virology Division (SAViD), New South Wales Health Pathology Randwick        | Virology Division (SAViD), New South Wales Health Pathology Randwick                                                 | Foster et al         |
| EPI_ISL_678343 | Area of Virology, Serology and Virology Division (SAViD), New South Wales Health Pathology Randwick        | Virology Division (SAViD), New South Wales Health Pathology Randwick                                                 | Foster et al         |
| EPI_ISL_451558 | Medlab Pathology                                                                                           | NSW Health Pathology - Institute of Clinical Pathology and Medical Research; Westmead Hospital; University of Sydney | CIDM-PH et al. et al |
| EPI_ISL_451594 | Childrens Hospital Westmead                                                                                | NSW Health Pathology - Institute of Clinical Pathology and Medical Research; Westmead Hospital; University of Sydney | CIDM-PH et al. et al |
| EPI_ISL_717711 | Area of Virology, Serology and Virology Division (SAViD), New South Wales Health Pathology Randwick        | Virology Division (SAViD), New South Wales Health Pathology Randwick                                                 | Foster et al         |
| EPI_ISL_455090 | South Eastern Area Laboratory Services                                                                     | NSW Health Pathology - Institute of Clinical Pathology and Medical Research; Westmead Hospital; University of Sydney | CIDM-PH et al. et al |
| EPI_ISL_455092 | South Eastern Area Laboratory Services                                                                     | NSW Health Pathology - Institute of Clinical Pathology and Medical Research; Westmead Hospital; University of Sydney | CIDM-PH et al. et al |
| EPI_ISL_455093 | South Eastern Area Laboratory Services                                                                     | NSW Health Pathology - Institute of Clinical Pathology and Medical Research; Westmead Hospital; University of Sydney | CIDM-PH et al. et al |
| EPI_ISL_478710 | South Eastern Area Laboratory Services (SEALS)                                                             | NSW Health Pathology - Institute of Clinical Pathology and Medical Research; Westmead Hospital; University of Sydney | CIDM-PH et al. et al |
| EPI_ISL_478717 | Sydney South West Pathology Service (SSWPS) - Concord Repatriation General Hospital - NSW Health Pathology | NSW Health Pathology - Institute of Clinical Pathology and Medical Research; Westmead Hospital; University of Sydney | CIDM-PH et al. et al |

|                |                                                                                                            |                                                                                                                      |                         |
|----------------|------------------------------------------------------------------------------------------------------------|----------------------------------------------------------------------------------------------------------------------|-------------------------|
| EPI_ISL_478718 | Sydney South West Pathology Service (SSWPS) - Concord Repatriation General Hospital - NSW Health Pathology | NSW Health Pathology - Institute of Clinical Pathology and Medical Research; Westmead Hospital; University of Sydney | CIDM-PH et al. et al    |
| EPI_ISL_490024 | South Eastern Area Laboratory Services (SEALS)                                                             | NSW Health Pathology - Institute of Clinical Pathology and Medical Research; Westmead Hospital; University of Sydney | CIDM-PH et al. et al    |
| EPI_ISL_490026 | South Eastern Area Laboratory Services (SEALS)                                                             | NSW Health Pathology - Institute of Clinical Pathology and Medical Research; Westmead Hospital; University of Sydney | CIDM-PH et al. et al    |
| EPI_ISL_490029 | South Eastern Area Laboratory Services (SEALS)                                                             | NSW Health Pathology - Institute of Clinical Pathology and Medical Research; Westmead Hospital; University of Sydney | CIDM-PH et al. et al    |
| EPI_ISL_513316 | South Eastern Area Laboratory Services (SEALS)                                                             | NSW Health Pathology - Institute of Clinical Pathology and Medical Research; Westmead Hospital; University of Sydney | CIDM-PH et al. et al    |
| EPI_ISL_545043 | Sydney South West Pathology Service (SSWPS) - Royal Prince Alfred Hospital - NSW Health Pathology          | NSW Health Pathology - Institute of Clinical Pathology and Medical Research; Westmead Hospital; University of Sydney | CIDM-PH et al. et al    |
| EPI_ISL_854745 | Royal Darwin Hospital Pathology                                                                            | MDU-PHL                                                                                                              | Meumann et al           |
| EPI_ISL_779409 | Royal Darwin Hospital Pathology                                                                            | MDU-PHL                                                                                                              | Meumann et al           |
| EPI_ISL_812423 | Royal Darwin Hospital Pathology                                                                            | MDU-PHL                                                                                                              | Meumann et al           |
| EPI_ISL_407894 | Pathology Queensland                                                                                       | Public Health Virology Laboratory                                                                                    | Ben Huang et al         |
| EPI_ISL_410717 | Pathology Queensland                                                                                       | Public Health Virology Laboratory                                                                                    | Ben Huang et al         |
| EPI_ISL_410718 | Pathology Queensland                                                                                       | Public Health Virology Laboratory                                                                                    | Ben Huang et al         |
| EPI_ISL_530271 | Queensland Health Forensic and Scientific Services, Public Health Virology                                 | Public Health Virology Laboratory, Forensic and Scientific Services, Queensland Health                               | Son Nguyen et al et al  |
| EPI_ISL_639819 | unknown                                                                                                    | Public Health Virology Laboratory, Forensic and Scientific Services (PHV-FSS)                                        | Son Nguyen et al. et al |
| EPI_ISL_693270 | unknown                                                                                                    | Public Health Virology Laboratory, Forensic and Scientific Services (PHV-FSS)                                        | Son Nguyen et al. et al |
| EPI_ISL_849679 | unknown                                                                                                    | PHV-FSS                                                                                                              | Son Nguyen et al. et al |
| EPI_ISL_849694 | unknown                                                                                                    | PHV-FSS                                                                                                              | Son Nguyen et al. et al |
| EPI_ISL_849701 | unknown                                                                                                    | PHV-FSS                                                                                                              | Son Nguyen et al. et al |
| EPI_ISL_849703 | unknown                                                                                                    | PHV-FSS                                                                                                              | Son Nguyen et al. et al |
| EPI_ISL_849728 | unknown                                                                                                    | PHV-FSS                                                                                                              | Son Nguyen et al. et al |
| EPI_ISL_849731 | unknown                                                                                                    | PHV-FSS                                                                                                              | Son Nguyen et al. et al |
| EPI_ISL_849762 | unknown                                                                                                    | PHV-FSS                                                                                                              | Son Nguyen et al. et al |
| EPI_ISL_944743 | unknown                                                                                                    | Public Health Virology-Forensic and Scientific Services (PHV-FSS)                                                    | Son Nguyen et al. et al |
| EPI_ISL_944748 | unknown                                                                                                    | Public Health Virology-Forensic and Scientific Services (PHV-FSS)                                                    | Son Nguyen et al. et al |
| EPI_ISL_962180 | unknown                                                                                                    | Public Health Virology-Forensic and Scientific Services (PHV-FSS)                                                    | Son Nguyen et al. et al |
| EPI_ISL_968212 | PHV-FSS                                                                                                    | PHV-FSS                                                                                                              | Son Nguyen et al. et al |
| EPI_ISL_985234 | unknown                                                                                                    | Public Health Virology-Forensic and Scientific Services                                                              | Son Nguyen et al. et al |
| EPI_ISL_985235 | unknown                                                                                                    | Public Health Virology-Forensic and Scientific Services                                                              | Son Nguyen et al. et al |
| EPI_ISL_530232 | Queensland Health Forensic and Scientific Services, Public Health Virology                                 | Public Health Virology Laboratory, Forensic and Scientific Services, Queensland Health                               | Son Nguyen et al et al  |
| EPI_ISL_418799 | Mater Pathology                                                                                            | Public Health Virology Laboratory                                                                                    | Bixing Huang et al      |
| EPI_ISL_480778 | Victorian Infectious Diseases Reference Laboratory (VIDRL)                                                 | VIDRL and MDU-PHL                                                                                                    | Caly L. et al           |
| EPI_ISL_480779 | Victorian Infectious Diseases Reference Laboratory (VIDRL)                                                 | VIDRL and MDU-PHL                                                                                                    | Caly L. et al           |
| EPI_ISL_480780 | Victorian Infectious Diseases Reference Laboratory (VIDRL)                                                 | VIDRL and MDU-PHL                                                                                                    | Caly L. et al           |
| EPI_ISL_480781 | Victorian Infectious Diseases Reference Laboratory (VIDRL)                                                 | VIDRL and MDU-PHL                                                                                                    | Caly L. et al           |

|                |                                                                      |                                                                                                                                                                                                                                                         |                  |
|----------------|----------------------------------------------------------------------|---------------------------------------------------------------------------------------------------------------------------------------------------------------------------------------------------------------------------------------------------------|------------------|
| EPI_ISL_468039 | SA Pathology                                                         | SA Pathology                                                                                                                                                                                                                                            | Lex Leong et al  |
| EPI_ISL_468032 | SA Pathology                                                         | SA Pathology                                                                                                                                                                                                                                            | Lex Leong et al  |
| EPI_ISL_468035 | SA Pathology                                                         | SA Pathology                                                                                                                                                                                                                                            | Lex Leong et al  |
| EPI_ISL_468037 | SA Pathology                                                         | SA Pathology                                                                                                                                                                                                                                            | Lex Leong et al  |
| EPI_ISL_508132 | SA Pathology                                                         | SA Pathology                                                                                                                                                                                                                                            | Lex Leong et al  |
| EPI_ISL_622762 | SA Pathology                                                         | SA Pathology                                                                                                                                                                                                                                            | Lex Leong et al  |
| EPI_ISL_752598 | SA Pathology                                                         | SA Pathology                                                                                                                                                                                                                                            | Lex Leong et al  |
| EPI_ISL_522742 | Royal Hobart Hospital Microbiology Department                        | MDU-PHL                                                                                                                                                                                                                                                 | Cooley L. et al  |
| EPI_ISL_406844 | Monash Medical Centre                                                | Collaboration between the University of Melbourne at The Peter Doherty Institute for Infection and Immunity, and the Victorian Infectious Diseases Reference Laboratory and Microbiological Diagnostic Unit Public Health Laboratory, Doherty Institute | Caly et al       |
| EPI_ISL_416410 | Victorian Infectious Diseases Reference Laboratory (VIDRL)           | Victorian Infectious Diseases Reference Laboratory and Microbiological Diagnostic Unit Public Health Laboratory, Doherty Institute                                                                                                                      | Caly L. et al    |
| EPI_ISL_416411 | Victorian Infectious Diseases Reference Laboratory (VIDRL)           | Victorian Infectious Diseases Reference Laboratory and Microbiological Diagnostic Unit Public Health Laboratory, Doherty Institute                                                                                                                      | Caly L. et al    |
| EPI_ISL_416415 | Victorian Infectious Diseases Reference Laboratory (VIDRL)           | Victorian Infectious Diseases Reference Laboratory and Microbiological Diagnostic Unit Public Health Laboratory, Doherty Institute                                                                                                                      | Caly L. et al    |
| EPI_ISL_561677 | Microbiological Diagnostic Unit - Public Health Laboratory (MDU-PHL) | MDU-PHL                                                                                                                                                                                                                                                 | Seemann et al    |
| EPI_ISL_563126 | Microbiological Diagnostic Unit - Public Health Laboratory (MDU-PHL) | MDU-PHL                                                                                                                                                                                                                                                 | Seemann et al    |
| EPI_ISL_563128 | Microbiological Diagnostic Unit - Public Health Laboratory (MDU-PHL) | MDU-PHL                                                                                                                                                                                                                                                 | Seemann et al    |
| EPI_ISL_563150 | Microbiological Diagnostic Unit - Public Health Laboratory (MDU-PHL) | MDU-PHL                                                                                                                                                                                                                                                 | Seemann et al    |
| EPI_ISL_561733 | Microbiological Diagnostic Unit - Public Health Laboratory (MDU-PHL) | MDU-PHL                                                                                                                                                                                                                                                 | Seemann et al    |
| EPI_ISL_563505 | Microbiological Diagnostic Unit - Public Health Laboratory (MDU-PHL) | MDU-PHL                                                                                                                                                                                                                                                 | Seemann et al    |
| EPI_ISL_563517 | Microbiological Diagnostic Unit - Public Health Laboratory (MDU-PHL) | MDU-PHL                                                                                                                                                                                                                                                 | Seemann et al    |
| EPI_ISL_419733 | Victorian Infectious Diseases Reference Laboratory (VIDRL)           | Victorian Infectious Diseases Reference Laboratory and Microbiological Diagnostic Unit Public Health Laboratory, Doherty Institute                                                                                                                      | Caly L. et al    |
| EPI_ISL_592241 | Microbiological Diagnostic Unit - Public Health Laboratory (MDU-PHL) | MDU-PHL                                                                                                                                                                                                                                                 | Seemann T. et al |
| EPI_ISL_561398 | Microbiological Diagnostic Unit - Public Health Laboratory (MDU-PHL) | MDU-PHL                                                                                                                                                                                                                                                 | Seemann et al    |
| EPI_ISL_561935 | Victorian Infectious Diseases Reference Laboratory (VIDRL)           | VIDRL and MDU-PHL                                                                                                                                                                                                                                       | Caly et al       |
| EPI_ISL_563865 | Microbiological Diagnostic Unit - Public Health Laboratory (MDU-PHL) | MDU-PHL                                                                                                                                                                                                                                                 | Seemann et al    |
| EPI_ISL_563868 | Microbiological Diagnostic Unit - Public Health Laboratory (MDU-PHL) | MDU-PHL                                                                                                                                                                                                                                                 | Seemann et al    |
| EPI_ISL_563871 | Microbiological Diagnostic Unit - Public Health Laboratory (MDU-PHL) | MDU-PHL                                                                                                                                                                                                                                                 | Seemann et al    |
| EPI_ISL_563875 | Microbiological Diagnostic Unit - Public Health Laboratory (MDU-PHL) | MDU-PHL                                                                                                                                                                                                                                                 | Seemann et al    |
| EPI_ISL_419734 | Victorian Infectious Diseases Reference Laboratory (VIDRL)           | Victorian Infectious Diseases Reference Laboratory and Microbiological Diagnostic Unit Public Health Laboratory, Doherty Institute                                                                                                                      | Caly L. et al    |
| EPI_ISL_456422 | Victorian Infectious Diseases Reference Laboratory (VIDRL)           | Microbiological Diagnostic Unit Public Health Laboratory and Victorian Infectious Diseases Reference Laboratory, Doherty Institute                                                                                                                      | Caly L. et al    |
| EPI_ISL_456424 | Victorian Infectious Diseases Reference Laboratory (VIDRL)           | Microbiological Diagnostic Unit Public Health Laboratory and Victorian Infectious Diseases Reference Laboratory, Doherty Institute                                                                                                                      | Caly L. et al    |
| EPI_ISL_456426 | Victorian Infectious Diseases Reference Laboratory (VIDRL)           | Victorian Infectious Diseases Reference Laboratory and Microbiological Diagnostic Unit Public Health Laboratory, Doherty Institute                                                                                                                      | Caly L. et al    |
| EPI_ISL_592416 | Microbiological Diagnostic Unit - Public Health Laboratory (MDU-PHL) | MDU-PHL                                                                                                                                                                                                                                                 | Seemann T. et al |
| EPI_ISL_592774 | Microbiological Diagnostic Unit - Public Health Laboratory (MDU-PHL) | MDU-PHL                                                                                                                                                                                                                                                 | Seemann T. et al |
| EPI_ISL_640343 | Microbiological Diagnostic Unit - Public Health Laboratory (MDU-PHL) | MDU-PHL                                                                                                                                                                                                                                                 | Seemann T. et al |

|                |                                                                      |                                                                                                                                    |                                                                   |
|----------------|----------------------------------------------------------------------|------------------------------------------------------------------------------------------------------------------------------------|-------------------------------------------------------------------|
| EPI_ISL_640368 | Microbiological Diagnostic Unit - Public Health Laboratory (MDU-PHL) | MDU-PHL                                                                                                                            | Seemann T. et al                                                  |
| EPI_ISL_641055 | Microbiological Diagnostic Unit - Public Health Laboratory (MDU-PHL) | MDU-PHL                                                                                                                            | Seemann T. et al                                                  |
| EPI_ISL_779617 | Victorian Infectious Diseases Reference Laboratory (VIDRL)           | VIDRL and MDU-PHL                                                                                                                  | Caly L. et al                                                     |
| EPI_ISL_979358 | Microbiological Diagnostic Unit - Public Health Laboratory (MDU-PHL) | MDU-PHL                                                                                                                            | Seemann T. et al                                                  |
| EPI_ISL_979360 | Microbiological Diagnostic Unit - Public Health Laboratory (MDU-PHL) | MDU-PHL                                                                                                                            | Seemann T. et al                                                  |
| EPI_ISL_979361 | Microbiological Diagnostic Unit - Public Health Laboratory (MDU-PHL) | MDU-PHL                                                                                                                            | Seemann T. et al                                                  |
| EPI_ISL_979362 | Victorian Infectious Diseases Reference Laboratory (VIDRL)           | VIDRL and MDU-PHL                                                                                                                  | Caly L. et al                                                     |
| EPI_ISL_979363 | Victorian Infectious Diseases Reference Laboratory (VIDRL)           | VIDRL and MDU-PHL                                                                                                                  | Caly L. et al                                                     |
| EPI_ISL_979364 | Victorian Infectious Diseases Reference Laboratory (VIDRL)           | VIDRL and MDU-PHL                                                                                                                  | Caly L. et al                                                     |
| EPI_ISL_480715 | Victorian Infectious Diseases Reference Laboratory (VIDRL)           | VIDRL and MDU-PHL                                                                                                                  | Caly L. et al                                                     |
| EPI_ISL_521940 | Microbiological Diagnostic Unit - Public Health Laboratory (MDU-PHL) | Microbiological Diagnostic Unit Public Health Laboratory and Victorian Infectious Diseases Reference Laboratory, Doherty Institute | Seemann T. et al                                                  |
| EPI_ISL_426752 | Victorian Infectious Diseases Reference Laboratory (VIDRL)           | Microbiological Diagnostic Unit Public Health Laboratory and Victorian Infectious Diseases Reference Laboratory, Doherty Institute | Caly L. et al                                                     |
| EPI_ISL_519116 | Microbiological Diagnostic Unit - Public Health Laboratory (MDU-PHL) | MDU-PHL                                                                                                                            | Seemann T. et al                                                  |
| EPI_ISL_519848 | Microbiological Diagnostic Unit - Public Health Laboratory (MDU-PHL) | MDU-PHL                                                                                                                            | Seemann T. et al                                                  |
| EPI_ISL_518236 | Microbiological Diagnostic Unit - Public Health Laboratory (MDU-PHL) | MDU-PHL                                                                                                                            | Seemann T. et al                                                  |
| EPI_ISL_563992 | Microbiological Diagnostic Unit - Public Health Laboratory (MDU-PHL) | MDU-PHL                                                                                                                            | Seemann et al                                                     |
| EPI_ISL_564661 | Microbiological Diagnostic Unit - Public Health Laboratory (MDU-PHL) | MDU-PHL                                                                                                                            | Seemann et al                                                     |
| EPI_ISL_564765 | Microbiological Diagnostic Unit - Public Health Laboratory (MDU-PHL) | MDU-PHL                                                                                                                            | Seemann et al                                                     |
| EPI_ISL_564854 | Microbiological Diagnostic Unit - Public Health Laboratory (MDU-PHL) | Microbiological Diagnostic Unit Public Health Laboratory and Victorian Infectious Diseases Reference Laboratory, Doherty Institute | Seemann et al                                                     |
| EPI_ISL_427107 | Victorian Infectious Diseases Reference Laboratory (VIDRL)           | Microbiological Diagnostic Unit Public Health Laboratory and Victorian Infectious Diseases Reference Laboratory, Doherty Institute | Caly L. et al                                                     |
| EPI_ISL_427124 | Victorian Infectious Diseases Reference Laboratory (VIDRL)           | Microbiological Diagnostic Unit Public Health Laboratory and Victorian Infectious Diseases Reference Laboratory, Doherty Institute | Caly L. et al                                                     |
| EPI_ISL_427131 | Victorian Infectious Diseases Reference Laboratory (VIDRL)           | Microbiological Diagnostic Unit Public Health Laboratory and Victorian Infectious Diseases Reference Laboratory, Doherty Institute | Caly L. et al                                                     |
| EPI_ISL_565369 | Microbiological Diagnostic Unit - Public Health Laboratory (MDU-PHL) | MDU-PHL                                                                                                                            | Seemann et al                                                     |
| EPI_ISL_455603 | SA Pathology                                                         | VPRL                                                                                                                               | Beard et al                                                       |
| EPI_ISL_420456 | PathWest Laboratory Medicine WA                                      | PathWest Laboratory Medicine WA                                                                                                    | Chisha Sikazwe et al                                              |
| EPI_ISL_596742 | PathWest Laboratory Medicine WA                                      | PathWest Laboratory Medicine WA Microbial Surveillance Unit                                                                        | PathWest Laboratory Medicine WA Microbial Surveillance Unit et al |
| EPI_ISL_596752 | PathWest Laboratory Medicine WA                                      | PathWest Laboratory Medicine WA Microbial Surveillance Unit                                                                        | PathWest Laboratory Medicine WA Microbial Surveillance Unit et al |
| EPI_ISL_596777 | PathWest Laboratory Medicine WA                                      | PathWest Laboratory Medicine WA Microbial Surveillance Unit                                                                        | PathWest Laboratory Medicine WA Microbial Surveillance Unit et al |
| EPI_ISL_596854 | PathWest Laboratory Medicine WA                                      | PathWest Laboratory Medicine WA Microbial Surveillance Unit                                                                        | PathWest Laboratory Medicine WA Microbial Surveillance Unit et al |
| EPI_ISL_470851 | PathWest Laboratory Medicine WA                                      | PathWest Laboratory Medicine WA                                                                                                    | Chisha Sikazwe et al                                              |
| EPI_ISL_605831 | PathWest Laboratory Medicine WA                                      | PathWest Laboratory Medicine WA Microbial Surveillance Unit                                                                        | PathWest Laboratory Medicine WA Microbial Surveillance Unit et al |
| EPI_ISL_605879 | PathWest Laboratory Medicine WA                                      | PathWest Laboratory Medicine WA Microbial Surveillance Unit                                                                        | PathWest Laboratory Medicine WA Microbial Surveillance Unit et al |
| EPI_ISL_708745 | PathWest Laboratory Medicine WA                                      | PathWest Laboratory Medicine WA Microbial Surveillance Unit                                                                        | PathWest Laboratory Medicine WA Microbial Surveillance Unit et al |







|                |                                                                                                  |                                                                                                        |                      |
|----------------|--------------------------------------------------------------------------------------------------|--------------------------------------------------------------------------------------------------------|----------------------|
| EPI_ISL_854262 | Austrian Agency for Health and Food Safety (AGES)                                                | Bergthaler laboratory, CeMM Research Center for Molecular Medicine of the Austrian Academy of Sciences | Lukas Endler et al   |
| EPI_ISL_853971 | Austrian Agency for Health and Food Safety (AGES)                                                | Bergthaler laboratory, CeMM Research Center for Molecular Medicine of the Austrian Academy of Sciences | Lukas Endler et al   |
| EPI_ISL_854159 | Austrian Agency for Health and Food Safety (AGES)                                                | Bergthaler laboratory, CeMM Research Center for Molecular Medicine of the Austrian Academy of Sciences | Lukas Endler et al   |
| EPI_ISL_853977 | Austrian Agency for Health and Food Safety (AGES)                                                | Bergthaler laboratory, CeMM Research Center for Molecular Medicine of the Austrian Academy of Sciences | Lukas Endler et al   |
| EPI_ISL_854164 | Austrian Agency for Health and Food Safety (AGES)                                                | Bergthaler laboratory, CeMM Research Center for Molecular Medicine of the Austrian Academy of Sciences | Lukas Endler et al   |
| EPI_ISL_934429 | ILV Kärnten                                                                                      | Bergthaler laboratory, CeMM Research Center for Molecular Medicine of the Austrian Academy of Sciences | Lukas Endler et al   |
| EPI_ISL_853927 | ILV Kärnten                                                                                      | Bergthaler laboratory, CeMM Research Center for Molecular Medicine of the Austrian Academy of Sciences | Lukas Endler et al   |
| EPI_ISL_854180 | Austrian Agency for Health and Food Safety (AGES)                                                | Bergthaler laboratory, CeMM Research Center for Molecular Medicine of the Austrian Academy of Sciences | Lukas Endler et al   |
| EPI_ISL_854176 | Austrian Agency for Health and Food Safety (AGES)                                                | Bergthaler laboratory, CeMM Research Center for Molecular Medicine of the Austrian Academy of Sciences | Lukas Endler et al   |
| EPI_ISL_853809 | Austrian Agency for Health and Food Safety (AGES)                                                | Bergthaler laboratory, CeMM Research Center for Molecular Medicine of the Austrian Academy of Sciences | Lukas Endler et al   |
| EPI_ISL_853810 | Austrian Agency for Health and Food Safety (AGES)                                                | Bergthaler laboratory, CeMM Research Center for Molecular Medicine of the Austrian Academy of Sciences | Lukas Endler et al   |
| EPI_ISL_853746 | Austrian Agency for Health and Food Safety (AGES)                                                | Bergthaler laboratory, CeMM Research Center for Molecular Medicine of the Austrian Academy of Sciences | Lukas Endler et al   |
| EPI_ISL_853807 | Austrian Agency for Health and Food Safety (AGES)                                                | Bergthaler laboratory, CeMM Research Center for Molecular Medicine of the Austrian Academy of Sciences | Lukas Endler et al   |
| EPI_ISL_853766 | Austrian Agency for Health and Food Safety (AGES)                                                | Bergthaler laboratory, CeMM Research Center for Molecular Medicine of the Austrian Academy of Sciences | Lukas Endler et al   |
| EPI_ISL_854177 | Austrian Agency for Health and Food Safety (AGES)                                                | Bergthaler laboratory, CeMM Research Center for Molecular Medicine of the Austrian Academy of Sciences | Lukas Endler et al   |
| EPI_ISL_854183 | Austrian Agency for Health and Food Safety (AGES)                                                | Bergthaler laboratory, CeMM Research Center for Molecular Medicine of the Austrian Academy of Sciences | Lukas Endler et al   |
| EPI_ISL_934579 | Department of Laboratory Medicine, Division of Clinical Virology, University of Medicine, Vienna | Bergthaler laboratory, CeMM Research Center for Molecular Medicine of the Austrian Academy of Sciences | Lukas Endler et al   |
| EPI_ISL_934580 | Department of Laboratory Medicine, Division of Clinical Virology, University of Medicine, Vienna | Bergthaler laboratory, CeMM Research Center for Molecular Medicine of the Austrian Academy of Sciences | Lukas Endler et al   |
| EPI_ISL_934585 | Department of Laboratory Medicine, Division of Clinical Virology, University of Medicine, Vienna | Bergthaler laboratory, CeMM Research Center for Molecular Medicine of the Austrian Academy of Sciences | Lukas Endler et al   |
| EPI_ISL_934586 | Department of Laboratory Medicine, Division of Clinical Virology, University of Medicine, Vienna | Bergthaler laboratory, CeMM Research Center for Molecular Medicine of the Austrian Academy of Sciences | Lukas Endler et al   |
| EPI_ISL_934665 | Department of Laboratory Medicine, Division of Clinical Virology, University of Medicine, Vienna | Bergthaler laboratory, CeMM Research Center for Molecular Medicine of the Austrian Academy of Sciences | Lukas Endler et al   |
| EPI_ISL_653916 | Diagnostic- and Research Institute of Pathology, Medical University of Graz                      | Diagnostic- and Research Institute of Pathology, Medical University of Graz                            | Karl Kashofer et al  |
| EPI_ISL_913093 | Center for Virology                                                                              | Center for Virology                                                                                    | Jeremy V. Camp et al |
| EPI_ISL_913089 | Center for Virology                                                                              | Center for Virology                                                                                    | Jeremy V. Camp et al |
| EPI_ISL_913094 | Center for Virology                                                                              | Center for Virology                                                                                    | Jeremy V. Camp et al |
| EPI_ISL_913086 | Center for Virology                                                                              | Center for Virology                                                                                    | Jeremy V. Camp et al |
| EPI_ISL_913090 | Center for Virology                                                                              | Center for Virology                                                                                    | Jeremy V. Camp et al |
| EPI_ISL_913072 | Center for Virology                                                                              | Center for Virology                                                                                    | Jeremy V. Camp et al |





|                |                                                               |                                                            |                                  |
|----------------|---------------------------------------------------------------|------------------------------------------------------------|----------------------------------|
| EPI_ISL_681303 | Communicable Disease Laboratory, Public Health Directorate    | Communicable Disease Laboratory, Public Health Directorate | Alwasti et al                    |
| EPI_ISL_681319 | Communicable Disease Laboratory, Public Health Directorate    | Communicable Disease Laboratory, Public Health Directorate | Alwasti et al                    |
| EPI_ISL_682317 | Communicable Disease Laboratory, Public Health Directorate    | Communicable Disease Laboratory, Public Health Directorate | Alwasti et al                    |
| EPI_ISL_681318 | Communicable Disease Laboratory, Public Health Directorate    | Communicable Disease Laboratory, Public Health Directorate | Alwasti et al                    |
| EPI_ISL_681317 | Communicable Disease Laboratory, Public Health Directorate    | Communicable Disease Laboratory, Public Health Directorate | Alwasti et al                    |
| EPI_ISL_681316 | Communicable Disease Laboratory, Public Health Directorate    | Communicable Disease Laboratory, Public Health Directorate | Alwasti et al                    |
| EPI_ISL_684035 | Communicable Disease Laboratory, Public Health Directorate    | Communicable Disease Laboratory, Public Health Directorate | Alwasti et al                    |
| EPI_ISL_682321 | Communicable Disease Laboratory, Public Health Directorate    | Communicable Disease Laboratory, Public Health Directorate | Alwasti et al                    |
| EPI_ISL_632906 | Communicable Disease Laboratory, Public Health Directorate    | Communicable Disease Laboratory, Public Health Directorate | AlAbbas et al                    |
| EPI_ISL_632265 | Communicable Disease Laboratory, Public Health Directorate    | Communicable Disease Laboratory, Public Health Directorate | AlWasti et al                    |
| EPI_ISL_632266 | Communicable Disease Laboratory, Public Health Directorate    | Communicable Disease Laboratory, Public Health Directorate | AlWasti et al                    |
| EPI_ISL_632267 | Communicable Disease Laboratory, Public Health Directorate    | Communicable Disease Laboratory, Public Health Directorate | AlWasti et al                    |
| EPI_ISL_681311 | Communicable Disease Laboratory, Public Health Directorate    | Communicable Disease Laboratory, Public Health Directorate | Alwasti et al                    |
| EPI_ISL_681301 | Communicable Disease Laboratory, Public Health Directorate    | Communicable Disease Laboratory, Public Health Directorate | Alwasti et al                    |
| EPI_ISL_682303 | Communicable Disease Laboratory, Public Health Directorate    | Communicable Disease Laboratory, Public Health Directorate | Alwasti et al                    |
| EPI_ISL_483542 | Kingdom of Bahrein Ministry of Health                         | Erasmus Medical Center                                     | Bas Oude Munnink et al           |
| EPI_ISL_483543 | Kingdom of Bahrein Ministry of Health                         | Erasmus Medical Center                                     | Bas Oude Munnink et al           |
| EPI_ISL_483544 | Kingdom of Bahrein Ministry of Health                         | Erasmus Medical Center                                     | Bas Oude Munnink et al           |
| EPI_ISL_483546 | Kingdom of Bahrein Ministry of Health                         | Erasmus Medical Center                                     | Bas Oude Munnink et al           |
| EPI_ISL_483548 | Kingdom of Bahrein Ministry of Health                         | Erasmus Medical Center                                     | Bas Oude Munnink et al           |
| EPI_ISL_483549 | Kingdom of Bahrein Ministry of Health                         | Erasmus Medical Center                                     | Bas Oude Munnink et al           |
| EPI_ISL_483550 | Kingdom of Bahrein Ministry of Health                         | Erasmus Medical Center                                     | Bas Oude Munnink et al           |
| EPI_ISL_483553 | Kingdom of Bahrein Ministry of Health                         | Erasmus Medical Center                                     | Bas Oude Munnink et al           |
| EPI_ISL_483554 | Kingdom of Bahrein Ministry of Health                         | Erasmus Medical Center                                     | Bas Oude Munnink et al           |
| EPI_ISL_483556 | Kingdom of Bahrein Ministry of Health                         | Erasmus Medical Center                                     | Bas Oude Munnink et al           |
| EPI_ISL_483560 | Kingdom of Bahrein Ministry of Health                         | Erasmus Medical Center                                     | Bas Oude Munnink et al           |
| EPI_ISL_483561 | Kingdom of Bahrein Ministry of Health                         | Erasmus Medical Center                                     | Bas Oude Munnink et al           |
| EPI_ISL_483562 | Kingdom of Bahrein Ministry of Health                         | Erasmus Medical Center                                     | Bas Oude Munnink et al           |
| EPI_ISL_483564 | Kingdom of Bahrein Ministry of Health                         | Erasmus Medical Center                                     | Bas Oude Munnink et al           |
| EPI_ISL_483638 | Kingdom of Bahrein Ministry of Health                         | Erasmus Medical Center                                     | Bas Oude Munnink et al           |
| EPI_ISL_483639 | Kingdom of Bahrein Ministry of Health                         | Erasmus Medical Center                                     | Bas Oude Munnink et al           |
| EPI_ISL_483640 | Kingdom of Bahrein Ministry of Health                         | Erasmus Medical Center                                     | Bas Oude Munnink et al           |
| EPI_ISL_600434 | Institute of Epidemiology Disease Control And Research        | Institute for Developing Science and Health Initiatives    | Lauren Cowley et al              |
| EPI_ISL_466630 | National Institute of Laboratory Medicine and Referral Center | Genomic Research Lab, BCSIR                                | Abu Sayeed Mohammad Mahmud et al |
| EPI_ISL_464163 | National Institute of Laboratory Medicine and Referral Center | Genomic Research Lab, BCSIR                                | Tanjina Akhter Banu et al        |
| EPI_ISL_466686 | National Institute of Laboratory Medicine and Referral Center | Genomic Research Lab, BCSIR                                | Abu Sayeed Mohammad Mahmud et al |
| EPI_ISL_483699 | National Institute of Laboratory Medicine and Referral Center | Genomic Research Lab, BCSIR                                | Abu Sayeed Mohammad Mahmud et al |
| EPI_ISL_498796 | National Institute of Laboratory Medicine and Referral Center | Genomic Research Lab, BCSIR                                | Md. Murshed Hasan Sarkar et al   |

|                |                                                               |                                                          |                                                                 |
|----------------|---------------------------------------------------------------|----------------------------------------------------------|-----------------------------------------------------------------|
| EPI_ISL_498804 | National Institute of Laboratory Medicine and Referral Center | Genomic Research Lab, BCSIR                              | Md. Murshed Hasan Sarkar et al                                  |
| EPI_ISL_498806 | National Institute of Laboratory Medicine and Referral Center | Genomic Research Lab, BCSIR                              | Md. Murshed Hasan Sarkar et al                                  |
| EPI_ISL_943549 | National Institute of Laboratory Medicine and Referral Center | Genomic Research Lab, BCSIR                              | Md. Murshed Hasan Sarkar et al                                  |
| EPI_ISL_955101 | National Institute of Laboratory Medicine and Referral Center | Genomic Research Lab, BCSIR                              | Tanjina Akhtar Banu et al                                       |
| EPI_ISL_959545 | National Institute of Laboratory Medicine and Referral Center | Genomic Research Lab, BCSIR                              | Md. Saddam Hossain et al                                        |
| EPI_ISL_983330 | National Institute of Laboratory Medicine and Referral Center | Genomic Research Lab, BCSIR                              | Md. Ahashan Habib et al                                         |
| EPI_ISL_959386 | National Institute of Laboratory Medicine and Referral Center | Genomic Research Lab, BCSIR                              | Md. Maruf Ahmed Molla et al                                     |
| EPI_ISL_964880 | National Institute of Laboratory Medicine and Referral Center | Sher-e-Bangla Nagar, Agargaon, Dhaka-1207, Bangladesh.   | Shahina Akter et al                                             |
| EPI_ISL_959475 | National Institute of Laboratory Medicine and Referral Center | Genomic Research Lab, BCSIR                              | Iffat Jahan et al                                               |
| EPI_ISL_964917 | National Institute of Laboratory Medicine and Referral Center | Genomic Research Lab, BCSIR                              | Md. Maruf Ahmed Molla et al<br>Abu Sayeed Mohammad Mahmud et al |
| EPI_ISL_603221 | National Institute of Laboratory Medicine and Referral Center | Genomic Research Lab, BCSIR                              | Shahina Akter et al                                             |
| EPI_ISL_603238 | National Institute of Laboratory Medicine and Referral Center | Genomic Research Lab, BCSIR                              | Shahina Akter et al                                             |
| EPI_ISL_603239 | National Institute of Laboratory Medicine and Referral Center | Genomic Research Lab, BCSIR                              | Tanjina Akhter Banu et al                                       |
| EPI_ISL_603240 | National Institute of Laboratory Medicine and Referral Center | Genomic Research Lab, BCSIR                              | Barna Goswami et al                                             |
| EPI_ISL_603242 | National Institute of Laboratory Medicine and Referral Center | Genomic Research Lab, BCSIR                              | Barna Goswami et al                                             |
| EPI_ISL_603243 | National Institute of Laboratory Medicine and Referral Center | Genomic Research Lab, BCSIR                              | Iffat Jahan et al                                               |
| EPI_ISL_603244 | National Institute of Laboratory Medicine and Referral Center | Genomic Research Lab, BCSIR                              | Iffat Jahan et al                                               |
| EPI_ISL_603245 | National Institute of Laboratory Medicine and Referral Center | Genomic Research Lab, BCSIR                              | Md. Ahashan Habib et al                                         |
| EPI_ISL_603249 | National Institute of Laboratory Medicine and Referral Center | Genomic Research Lab, BCSIR                              | Md. Ahashan Habib et al                                         |
| EPI_ISL_603250 | National Institute of Laboratory Medicine and Referral Center | Genomic Research Lab, BCSIR                              | Md. Murshed Hasan Sarkar et al                                  |
| EPI_ISL_803117 | National Institute of Laboratory Medicine and Referral Center | Bangladesh Council of Scientific and Industrial Research | Senjuti Saha et al                                              |
| EPI_ISL_468078 | Child Health Research Foundation                              | Child Health Research Foundation                         | Senjuti Saha et al                                              |
| EPI_ISL_492028 | Child Health Research Foundation                              | Child Health Research Foundation                         | Senjuti Saha et al                                              |
| EPI_ISL_625469 | Child Health Research Foundation                              | Child Health Research Foundation                         | Senjuti Saha et al                                              |
| EPI_ISL_625472 | Child Health Research Foundation                              | Child Health Research Foundation                         | Senjuti Saha et al                                              |
| EPI_ISL_700338 | Child Health Research Foundation                              | Child Health Research Foundation                         | Senjuti Saha et al                                              |
| EPI_ISL_700334 | Child Health Research Foundation                              | Child Health Research Foundation                         | Senjuti Saha et al                                              |
| EPI_ISL_700339 | Child Health Research Foundation                              | Child Health Research Foundation                         | Senjuti Saha et al                                              |
| EPI_ISL_700337 | Child Health Research Foundation                              | Child Health Research Foundation                         | Senjuti Saha et al                                              |
| EPI_ISL_700330 | Child Health Research Foundation                              | Child Health Research Foundation                         | Senjuti Saha et al                                              |
| EPI_ISL_700329 | Child Health Research Foundation                              | Child Health Research Foundation                         | Senjuti Saha et al                                              |
| EPI_ISL_700342 | Child Health Research Foundation                              | Child Health Research Foundation                         | Senjuti Saha et al                                              |
| EPI_ISL_700331 | Child Health Research Foundation                              | Child Health Research Foundation                         | Senjuti Saha et al                                              |
| EPI_ISL_700343 | Child Health Research Foundation                              | Child Health Research Foundation                         | Senjuti Saha et al                                              |
| EPI_ISL_700332 | Child Health Research Foundation                              | Child Health Research Foundation                         | Senjuti Saha et al                                              |
| EPI_ISL_700344 | Child Health Research Foundation                              | Child Health Research Foundation                         | Senjuti Saha et al                                              |
| EPI_ISL_700345 | Child Health Research Foundation                              | Child Health Research Foundation                         | Senjuti Saha et al                                              |
| EPI_ISL_700328 | Child Health Research Foundation                              | Child Health Research Foundation                         | Senjuti Saha et al                                              |
| EPI_ISL_700346 | Child Health Research Foundation                              | Child Health Research Foundation                         | Senjuti Saha et al                                              |

|                |                                                                  |                                                                                             |                               |
|----------------|------------------------------------------------------------------|---------------------------------------------------------------------------------------------|-------------------------------|
| EPI_ISL_700336 | Child Health Research Foundation                                 | Child Health Research Foundation                                                            | Senjuti Saha et al            |
| EPI_ISL_700347 | Child Health Research Foundation                                 | Child Health Research Foundation                                                            | Senjuti Saha et al            |
| EPI_ISL_906094 | Child Health Research Foundation                                 | Child Health Research Foundation                                                            | Senjuti Saha et al            |
| EPI_ISL_906106 | Child Health Research Foundation                                 | Child Health Research Foundation                                                            | Senjuti Saha et al            |
| EPI_ISL_906103 | Child Health Research Foundation                                 | Child Health Research Foundation                                                            | Senjuti Saha et al            |
| EPI_ISL_906090 | Child Health Research Foundation                                 | Child Health Research Foundation                                                            | Senjuti Saha et al            |
| EPI_ISL_906104 | Child Health Research Foundation                                 | Child Health Research Foundation                                                            | Senjuti Saha et al            |
| EPI_ISL_906114 | Child Health Research Foundation                                 | Child Health Research Foundation                                                            | Senjuti Saha et al            |
| EPI_ISL_906092 | Child Health Research Foundation                                 | Child Health Research Foundation                                                            | Senjuti Saha et al            |
| EPI_ISL_906083 | Child Health Research Foundation                                 | Child Health Research Foundation                                                            | Senjuti Saha et al            |
| EPI_ISL_906091 | Shimantik Pathology and Diagnostic Center                        | Child Health Research Foundation                                                            | Senjuti Saha et al            |
| EPI_ISL_906098 | Shimantik Pathology and Diagnostic Center                        | Child Health Research Foundation                                                            | Senjuti Saha et al            |
| EPI_ISL_735490 | Rangamati General Hospital RT-PCR lab,                           | Central Biological Research Laboratory and Department of Biochemistry and Molecular Biology | Robiul Hasan Bhuiyan et al    |
| EPI_ISL_735492 | Kumilla Medical College                                          | Central Biological Research Laboratory and Department of Biochemistry and Molecular Biology | Robiul Hasan Bhuiyan et al    |
| EPI_ISL_735493 | Cox's Bazar Medicila College                                     | Central Biological Research Laboratory and Department of Biochemistry and Molecular Biology | Robiul Hasan Bhuiyan et al    |
| EPI_ISL_735494 | Cox's Bazar Medical College                                      | Central Biological Research Laboratory and Department of Biochemistry and Molecular Biology | Md. Imranul Hoq et al         |
| EPI_ISL_735495 | Bhashabir M A Wadud RT-PCR Lab, Chandpur                         | Central Biological Research Laboratory and Department of Biochemistry and Molecular Biology | Md. Imranul Hoq et al         |
| EPI_ISL_735496 | Chattogram Veterinary and Animal Sciences University             | Central Biological Research Laboratory and Department of Biochemistry and Molecular Biology | Md. Imranul Hoq et al         |
| EPI_ISL_735497 | Chattogram Veterinary and Animal Sciences University             | Central Biological Research Laboratory and Department of Biochemistry and Molecular Biology | Mohammad Omar Faruque et al   |
| EPI_ISL_735500 | University of Chittagong                                         | Central Biological Research Laboratory and Department of Biochemistry and Molecular Biology | H. M. Abdullah Al Masud et al |
| EPI_ISL_735501 | Abdul Malek Ukil Medical College, Noakhali                       | Central Biological Research Laboratory and Department of Biochemistry and Molecular Biology | H. M. Abdullah Al Masud et al |
| EPI_ISL_735502 | Abdul Malek Ukil Medical College, Noakhali                       | Central Biological Research Laboratory and Department of Biochemistry and Molecular Biology | H. M. Abdullah Al Masud et al |
| EPI_ISL_445215 | DNA Solution Ltd.                                                | DNA Solution Ltd.                                                                           | Md. Imran Khan et al          |
| EPI_ISL_605901 | NGS Lab, DNA SOLUTION LTD.                                       | NGS Lab, DNA SOLUTION LTD.                                                                  | Khan et al                    |
| EPI_ISL_605902 | NGS Lab, DNA SOLUTION LTD.                                       | NGS Lab, DNA SOLUTION LTD.                                                                  | Khan et al                    |
| EPI_ISL_605910 | NGS Lab, DNA SOLUTION LTD.                                       | NGS Lab, DNA SOLUTION LTD.                                                                  | Khan et al                    |
| EPI_ISL_605915 | NGS Lab, DNA SOLUTION LTD.                                       | NGS Lab, DNA SOLUTION LTD.                                                                  | Khan et al                    |
| EPI_ISL_774891 | Designated Reference Institute for Chemical Measurements (DRICM) | DNA SOLUTION LTD.                                                                           | Md. Imran Khan et al          |
| EPI_ISL_774892 | Designated Reference Institute for Chemical Measurements (DRICM) | DNA SOLUTION LTD.                                                                           | Md. Imran Khan et al          |
| EPI_ISL_774900 | Designated Reference Institute for Chemical Measurements (DRICM) | DNA SOLUTION LTD.                                                                           | Md. Imran Khan et al          |
| EPI_ISL_774905 | Designated Reference Institute for Chemical Measurements (DRICM) | DNA SOLUTION LTD.                                                                           | Md. Imran Khan et al          |
| EPI_ISL_774922 | Designated Reference Institute for Chemical Measurements (DRICM) | DNA SOLUTION LTD.                                                                           | Md. Imran Khan et al          |
| EPI_ISL_774943 | Designated Reference Institute for Chemical Measurements (DRICM) | DNA SOLUTION LTD.                                                                           | Md. Imran Khan et al          |

|                |                                                                                                                                                |                                                                                                                                                                |                              |
|----------------|------------------------------------------------------------------------------------------------------------------------------------------------|----------------------------------------------------------------------------------------------------------------------------------------------------------------|------------------------------|
| EPI_ISL_774934 | Designated Reference Institute for Chemical Measurements (DRICM)                                                                               | DNA SOLUTION LTD.                                                                                                                                              | Md. Imran Khan et al         |
| EPI_ISL_774944 | Designated Reference Institute for Chemical Measurements (DRICM)                                                                               | DNA SOLUTION LTD.                                                                                                                                              | Md. Imran Khan et al         |
| EPI_ISL_774945 | Designated Reference Institute for Chemical Measurements (DRICM)                                                                               | DNA SOLUTION LTD.                                                                                                                                              | Md. Imran Khan et al         |
| EPI_ISL_774932 | Designated Reference Institute for Chemical Measurements (DRICM)                                                                               | DNA SOLUTION LTD.                                                                                                                                              | Md. Imran Khan et al         |
| EPI_ISL_854986 | NGS Lab, DNA SOLUTION LTD.                                                                                                                     | NGS Lab, DNA SOLUTION LTD.                                                                                                                                     | Khan et al                   |
| EPI_ISL_774921 | Designated Reference Institute for Chemical Measurements (DRICM)                                                                               | DNA SOLUTION LTD.                                                                                                                                              | Md. Imran Khan et al         |
| EPI_ISL_450840 | COVID-19 Laboratory                                                                                                                            | DNA Solution Ltd. L-5                                                                                                                                          | Sharif Akhteruzzaman et al   |
| EPI_ISL_450842 | COVID-19 Laboratory                                                                                                                            | DNA Solution Ltd.                                                                                                                                              | Sharif Akhteruzzaman et al   |
| EPI_ISL_450843 | COVID-19 Laboratory                                                                                                                            | DNA Solution Ltd.                                                                                                                                              | Sharif Akhteruzzaman et al   |
| EPI_ISL_450841 | COVID-19 Laboratory                                                                                                                            | DNA Solution Ltd                                                                                                                                               | Sharif Akhteruzzaman et al   |
| EPI_ISL_600562 | Institute of Epidemiology Disease Control And Research                                                                                         | Institute for Developing Science and Health Initiatives                                                                                                        | Lauren Cowley et al          |
| EPI_ISL_890237 | Virology, International Centre for Diarrhoeal Disease Research, Bangladesh (ICDDR,B)                                                           | International Centre for Diarrhoeal Disease Research (ICDDR,B)                                                                                                 | Hossain et al                |
| EPI_ISL_890193 | Gonoshasthaya-RNA Research Center, Gonoshasthaya-RNA Molecular Diagnostics and Research Center                                                 | Gonoshasthaya-RNA Research Center, Gonoshasthaya-RNA Molecular Diagnostics and Research Center                                                                 | Jamiruddin et al             |
| EPI_ISL_890190 | Gonoshasthaya-RNA Research Center, Gonoshasthaya-RNA Molecular Diagnostics and Research Center                                                 | Gonoshasthaya-RNA Research Center, Gonoshasthaya-RNA Molecular Diagnostics and Research Center                                                                 | Jamiruddin et al             |
| EPI_ISL_775214 | Gonoshasthaya-RNA Molecular Research Center                                                                                                    | Gonoshasthaya-RNA Molecular Research Center                                                                                                                    | Mohd. Raeed Jamiruddin et al |
| EPI_ISL_775217 | Gonoshasthaya-RNA Molecular Research Center                                                                                                    | Gonoshasthaya-RNA Molecular Research Center                                                                                                                    | Nihad Adnan et al            |
| EPI_ISL_884088 | Wazed Mia Science Research Center, Jahangirnagar University in collaboration with GRMDRC, Dhaka and Invent Technologies Ltd, Dhaka, Bangladesh | COVID Research Cell (CRC), Wazed Miah Science Research Center                                                                                                  | Md. Abdul Matin et al        |
| EPI_ISL_458133 | National Institute of Biotechnology                                                                                                            | Bioinformatics Division, National Institute of Biotechnology                                                                                                   | Mohammad Uzzal Hossain et al |
| EPI_ISL_754059 | Specialized Lab for COVID-19 Detection, Department of Genetic Engineering and Biotechnology                                                    | Specialized Lab for COVID-19 Detection, Department of Genetic Engineering and Biotechnology                                                                    | Md. Nazmul Hasan et al       |
| EPI_ISL_977655 | Caribbean Public Health Agency                                                                                                                 | Carrington Lab, Department of PreClinical Sciences, Building 36, First Floor Biochemistry Unit, Faculty of Medical Sciences, The University of the West Indies | Nikita S. D. Sahadeo et al   |
| EPI_ISL_977656 | Caribbean Public Health Agency                                                                                                                 | Carrington Lab, Department of PreClinical Sciences, Building 36, First Floor Biochemistry Unit, Faculty of Medical Sciences, The University of the West Indies | Nikita S. D. Sahadeo et al   |
| EPI_ISL_977658 | Caribbean Public Health Agency                                                                                                                 | Carrington Lab, Department of PreClinical Sciences, Building 36, First Floor Biochemistry Unit, Faculty of Medical Sciences, The University of the West Indies | Nikita S. D. Sahadeo et al   |
| EPI_ISL_977659 | Caribbean Public Health Agency                                                                                                                 | Carrington Lab, Department of PreClinical Sciences, Building 36, First Floor Biochemistry Unit, Faculty of Medical Sciences, The University of the West Indies | Nikita S. D. Sahadeo et al   |
| EPI_ISL_452360 | Laboratory of Infectious Diseases Center of Beijing Ditan Hospital                                                                             | Laboratory of Infectious Diseases Center of Beijing Ditan Hospital                                                                                             | Siyuan Yang et al            |
| EPI_ISL_452331 | Laboratory of Infectious Diseases Center of Beijing Ditan Hospital                                                                             | Laboratory of Infectious Diseases Center of Beijing Ditan Hospital                                                                                             | Siyuan Yang et al            |
| EPI_ISL_452343 | Laboratory of Infectious Diseases Center of Beijing Ditan Hospital                                                                             | Laboratory of Infectious Diseases Center of Beijing Ditan Hospital                                                                                             | Siyuan Yang et al            |
| EPI_ISL_452347 | Laboratory of Infectious Diseases Center of Beijing Ditan Hospital                                                                             | Laboratory of Infectious Diseases Center of Beijing Ditan Hospital                                                                                             | Siyuan Yang et al            |
| EPI_ISL_452341 | Laboratory of Infectious Diseases Center of Beijing Ditan Hospital                                                                             | Laboratory of Infectious Diseases Center of Beijing Ditan Hospital                                                                                             | Siyuan Yang et al            |
| EPI_ISL_452332 | Laboratory of Infectious Diseases Center of Beijing Ditan Hospital                                                                             | Laboratory of Infectious Diseases Center of Beijing Ditan Hospital                                                                                             | Siyuan Yang et al            |
| EPI_ISL_452339 | Laboratory of Infectious Diseases Center of Beijing Ditan Hospital                                                                             | Laboratory of Infectious Diseases Center of Beijing Ditan Hospital                                                                                             | Siyuan Yang et al            |
| EPI_ISL_450444 | 20 Dongda Street, Fengtai District, Beijing, Beijing 100071, China                                                                             | Dept. OPA, Beijing Institute of Microbiology and Epidemiology                                                                                                  | Zhang et al                  |

|                |                                                                                                                                                   |                                                                                                                                                   |                             |
|----------------|---------------------------------------------------------------------------------------------------------------------------------------------------|---------------------------------------------------------------------------------------------------------------------------------------------------|-----------------------------|
| EPI_ISL_850948 | National Institute for Viral Disease Control and Prevention, China CDC                                                                            | National Institute for Viral Disease Control and Prevention, China CDC                                                                            | Xiang Zhao et al            |
| EPI_ISL_469254 | National Institute for Viral Disease Control and Prevention, China CDC                                                                            | Institute of Viral Disease Control and Prevention, China CDC                                                                                      | Wenjie Tan et al            |
| EPI_ISL_469255 | National Institute for Viral Disease Control and Prevention, China CDC                                                                            | Institute of Viral Disease Control and Prevention, China CDC                                                                                      | Xiang Zhao et al            |
| EPI_ISL_575330 | National Institute for Viral Disease Control and Prevention, China CDC                                                                            | National Institute for Viral Disease Control and Prevention, China CDC                                                                            | Rongbao Gao et al           |
| EPI_ISL_861456 | WHO/Minsk                                                                                                                                         | Charité Universitätsmedizin Berlin, Institut für Virologie                                                                                        | Victor M Corman et al       |
| EPI_ISL_860803 | WHO/Minsk                                                                                                                                         | Charité Universitätsmedizin Berlin, Institut für Virologie                                                                                        | Victor M Corman et al       |
| EPI_ISL_860804 | WHO/Minsk                                                                                                                                         | Charité Universitätsmedizin Berlin, Institut für Virologie                                                                                        | Victor M Corman et al       |
| EPI_ISL_860808 | WHO/Minsk                                                                                                                                         | Charité Universitätsmedizin Berlin, Institut für Virologie                                                                                        | Victor M Corman et al       |
| EPI_ISL_860810 | WHO/Minsk                                                                                                                                         | Charité Universitätsmedizin Berlin, Institut für Virologie                                                                                        | Victor M Corman et al       |
| EPI_ISL_860812 | WHO/Minsk                                                                                                                                         | Charité Universitätsmedizin Berlin, Institut für Virologie                                                                                        | Victor M Corman et al       |
| EPI_ISL_860814 | WHO/Minsk                                                                                                                                         | Charité Universitätsmedizin Berlin, Institut für Virologie                                                                                        | Victor M Corman et al       |
| EPI_ISL_860815 | WHO/Minsk                                                                                                                                         | Charité Universitätsmedizin Berlin, Institut für Virologie                                                                                        | Victor M Corman et al       |
| EPI_ISL_860817 | WHO/Minsk                                                                                                                                         | Charité Universitätsmedizin Berlin, Institut für Virologie                                                                                        | Victor M Corman et al       |
| EPI_ISL_861458 | WHO/Minsk                                                                                                                                         | Charité Universitätsmedizin Berlin, Institut für Virologie                                                                                        | Victor M Corman et al       |
| EPI_ISL_860799 | WHO/Minsk                                                                                                                                         | Charité Universitätsmedizin Berlin, Institut für Virologie                                                                                        | Victor M Corman et al       |
| EPI_ISL_860801 | WHO/Minsk                                                                                                                                         | Charité Universitätsmedizin Berlin, Institut für Virologie                                                                                        | Victor M Corman et al       |
| EPI_ISL_754232 | The Republican Research and Practical Center for Epidemiology and Microbiology (RRPCEM)                                                           | WHO National Influenza Centre Russian Federation                                                                                                  | Elena Gasich et al          |
| EPI_ISL_933533 | Laboratory for HIV and opportunistic infections diagnosis The Republican Research and Practical Center for Epidemiology and Microbiology (RRPCEM) | Laboratory for HIV and opportunistic infections diagnosis The Republican Research and Practical Center for Epidemiology and Microbiology (RRPCEM) | Elena Gasich et al          |
| EPI_ISL_754229 | The Republican Research and Practical Center for Epidemiology and Microbiology (RRPCEM)                                                           | WHO National Influenza Centre Russian Federation                                                                                                  | Elena Gasich et al          |
| EPI_ISL_754230 | The Republican Research and Practical Center for Epidemiology and Microbiology (RRPCEM)                                                           | WHO National Influenza Centre Russian Federation                                                                                                  | Elena Gasich et al          |
| EPI_ISL_754231 | The Republican Research and Practical Center for Epidemiology and Microbiology (RRPCEM)                                                           | WHO National Influenza Centre Russian Federation                                                                                                  | Elena Gasich et al          |
| EPI_ISL_754233 | The Republican Research and Practical Center for Epidemiology and Microbiology (RRPCEM)                                                           | WHO National Influenza Centre Russian Federation                                                                                                  | Elena Gasich et al          |
| EPI_ISL_451935 | CUB Hopital Erasme Laboratoire d'Anatomie Pathologique                                                                                            | CUB Hopital Erasme Laboratoire d'Anatomie Pathologique                                                                                            | Prof. Isabelle Salmon et al |
| EPI_ISL_452142 | CUB Hopital Erasme Laboratoire d'Anatomie Pathologique                                                                                            | CUB Hopital Erasme Laboratoire d'Anatomie Pathologique                                                                                            | Isabelle Salmon et al       |
| EPI_ISL_452140 | CUB Hopital Erasme Laboratoire d'Anatomie Pathologique                                                                                            | CUB Hopital Erasme Laboratoire d'Anatomie Pathologique                                                                                            | Isabelle Salmon et al       |
| EPI_ISL_420338 | KU Leuven, Clinical and Epidemiological Virology                                                                                                  | KU Leuven, Clinical and Epidemiological Virology                                                                                                  | Joan Marti-Carreras et al   |
| EPI_ISL_954766 | AZDelta                                                                                                                                           | AZDelta                                                                                                                                           | Geert Martens et al         |
| EPI_ISL_961197 | AZDelta                                                                                                                                           | AZDelta                                                                                                                                           | Geert Martens et al         |
| EPI_ISL_978863 | AZDelta                                                                                                                                           | AZDelta                                                                                                                                           | Geert Martens et al         |
| EPI_ISL_978790 | AZDelta                                                                                                                                           | AZDelta                                                                                                                                           | Geert Martens et al         |
| EPI_ISL_978797 | AZDelta                                                                                                                                           | AZDelta                                                                                                                                           | Geert Martens et al         |
| EPI_ISL_415159 | KU Leuven, Clinical and Epidemiological Virology                                                                                                  | KU Leuven, Clinical and Epidemiological Virology                                                                                                  | Bert Vanmechelen et al      |
| EPI_ISL_407976 | KU Leuven, Clinical and Epidemiological Virology                                                                                                  | KU Leuven, Clinical and Epidemiological Virology                                                                                                  | Bert Vanmechelen et al      |

|                |                                                                  |                                                                  |                             |
|----------------|------------------------------------------------------------------|------------------------------------------------------------------|-----------------------------|
| EPI_ISL_464066 | KU Leuven, Rega Institute, Clinical and Epidemiological Virology | KU Leuven, Rega Institute, Clinical and Epidemiological Virology | Tony Wawina-Bokalanga et al |
| EPI_ISL_949079 | AZT                                                              | Jessa                                                            | Jessa_cmdLab et al          |
| EPI_ISL_949091 | AZV                                                              | Jessa                                                            | Jessa_cmdLab et al          |
| EPI_ISL_995513 | Jessa                                                            | Jessa                                                            | Jessa_cmdLab et al          |
| EPI_ISL_995516 | Jessa                                                            | Jessa                                                            | Jessa_cmdLab et al          |
| EPI_ISL_417429 | KU Leuven, Clinical and Epidemiological Virology                 | KU Leuven, Clinical and Epidemiological Virology                 | Joan Marti-Carreras et al   |
| EPI_ISL_420391 | KU Leuven, Clinical and Epidemiological Virology                 | KU Leuven, Clinical and Epidemiological Virology                 | Joan Marti-Carreras et al   |
| EPI_ISL_462274 | KU Leuven, Rega Institute, Clinical and Epidemiological Virology | KU Leuven, Rega Institute, Clinical and Epidemiological Virology | Tony Wawina-Bokalanga et al |
| EPI_ISL_420339 | KU Leuven, Clinical and Epidemiological Virology                 | KU Leuven, Clinical and Epidemiological Virology                 | Joan Marti-Carreras et al   |
| EPI_ISL_417426 | KU Leuven, Clinical and Epidemiological Virology                 | KU Leuven, Clinical and Epidemiological Virology                 | Joan Marti-Carreras et al   |
| EPI_ISL_634892 | Lab voor klinische biologie                                      | Onderzoeksgroep Virologie                                        | Nick Vereecke et al         |
| EPI_ISL_717607 | Lab voor klinische biologie                                      | Onderzoeksgroep Virologie                                        | Laurens Lambrechts et al    |
| EPI_ISL_717610 | Lab voor klinische biologie                                      | Onderzoeksgroep Virologie                                        | Nick Vereecke et al         |
| EPI_ISL_717611 | Lab voor klinische biologie                                      | Onderzoeksgroep Virologie                                        | Nick Vereecke et al         |
| EPI_ISL_717617 | Lab voor klinische biologie                                      | Onderzoeksgroep Virologie                                        | Nick Vereecke et al         |
| EPI_ISL_717573 | Lab voor klinische biologie                                      | Onderzoeksgroep Virologie                                        | Nick Vereecke et al         |
| EPI_ISL_451164 | Lab voor klinische biologie                                      | Onderzoeksgroep Virologie                                        | Laurens Lambrechts et al    |
| EPI_ISL_717997 | Lab voor klinische biologie                                      | Onderzoeksgroep Virologie                                        | Laurens Lambrechts et al    |
| EPI_ISL_717998 | Lab voor klinische biologie                                      | Onderzoeksgroep Virologie                                        | Laurens Lambrechts et al    |
| EPI_ISL_717999 | Lab voor klinische biologie                                      | Onderzoeksgroep Virologie                                        | Laurens Lambrechts et al    |
| EPI_ISL_718001 | Lab voor klinische biologie                                      | Onderzoeksgroep Virologie                                        | Nick Vereecke et al         |
| EPI_ISL_718002 | Lab voor klinische biologie                                      | Onderzoeksgroep Virologie                                        | Nick Vereecke et al         |
| EPI_ISL_718003 | Lab voor klinische biologie                                      | Onderzoeksgroep Virologie                                        | Nick Vereecke et al         |
| EPI_ISL_718004 | Lab voor klinische biologie                                      | Onderzoeksgroep Virologie                                        | Nick Vereecke et al         |
| EPI_ISL_718011 | Lab voor klinische biologie                                      | Onderzoeksgroep Virologie                                        | Laurens Lambrechts et al    |
| EPI_ISL_427357 | Department of Clinical Microbiology                              | GIGA Medical Genomics                                            | Keith Durkin et al          |
| EPI_ISL_427372 | Department of Clinical Microbiology                              | GIGA Medical Genomics                                            | Keith Durkin et al          |
| EPI_ISL_427378 | Department of Clinical Microbiology                              | GIGA Medical Genomics                                            | Keith Durkin et al          |
| EPI_ISL_471432 | Department of Clinical Microbiology                              | GIGA Medical Genomics                                            | Keith Durkin et al          |
| EPI_ISL_471435 | Department of Clinical Microbiology                              | GIGA Medical Genomics                                            | Keith Durkin et al          |
| EPI_ISL_498130 | Department of Clinical Microbiology                              | GIGA Medical Genomics                                            | Keith Durkin et al          |
| EPI_ISL_498131 | Department of Clinical Microbiology                              | GIGA Medical Genomics                                            | Keith Durkin et al          |
| EPI_ISL_498133 | Department of Clinical Microbiology                              | GIGA Medical Genomics                                            | Keith Durkin et al          |
| EPI_ISL_515060 | Department of Clinical Microbiology                              | GIGA Medical Genomics                                            | Keith Durkin et al          |
| EPI_ISL_540448 | University of Liège COVID-19 testing center                      | GIGA Medical Genomics                                            | Keith Durkin et al          |
| EPI_ISL_540459 | University of Liège COVID-19 testing center                      | GIGA Medical Genomics                                            | Keith Durkin et al          |
| EPI_ISL_540468 | University of Liège COVID-19 testing center                      | GIGA Medical Genomics                                            | Keith Durkin et al          |
| EPI_ISL_540479 | Department of Clinical Microbiology                              | GIGA Medical Genomics                                            | Keith Durkin et al          |
| EPI_ISL_540549 | Department of Clinical Microbiology                              | GIGA Medical Genomics                                            | Keith Durkin et al          |

|                |                                                                                                  |                                                                  |                             |
|----------------|--------------------------------------------------------------------------------------------------|------------------------------------------------------------------|-----------------------------|
| EPI_ISL_540552 | Department of Clinical Microbiology                                                              | GIGA Medical Genomics                                            | Keith Durkin et al          |
| EPI_ISL_540575 | Department of Clinical Microbiology                                                              | GIGA Medical Genomics                                            | Keith Durkin et al          |
| EPI_ISL_581629 | Department of Clinical Microbiology                                                              | GIGA Medical Genomics                                            | Keith Durkin et al          |
| EPI_ISL_581632 | Department of Clinical Microbiology                                                              | GIGA Medical Genomics                                            | Keith Durkin et al          |
| EPI_ISL_581633 | Department of Clinical Microbiology                                                              | GIGA Medical Genomics                                            | Keith Durkin et al          |
| EPI_ISL_626312 | Department of Clinical Microbiology                                                              | GIGA Medical Genomics                                            | Keith Durkin et al          |
| EPI_ISL_661227 | Department of Clinical Microbiology                                                              | GIGA Medical Genomics                                            | Keith Durkin et al          |
| EPI_ISL_678414 | Department of Clinical Microbiology                                                              | GIGA Medical Genomics                                            | Keith Durkin et al          |
| EPI_ISL_678424 | Department of Clinical Microbiology                                                              | GIGA Medical Genomics                                            | Keith Durkin et al          |
| EPI_ISL_707765 | Department of Clinical Microbiology                                                              | GIGA Medical Genomics                                            | Keith Durkin et al          |
| EPI_ISL_925422 | Department of Clinical Microbiology                                                              | GIGA Medical Genomics                                            | Keith Durkin et al          |
| EPI_ISL_925490 | Department of Clinical Microbiology                                                              | GIGA Medical Genomics                                            | Keith Durkin et al          |
| EPI_ISL_925493 | Department of Clinical Microbiology                                                              | GIGA Medical Genomics                                            | Keith Durkin et al          |
| EPI_ISL_984622 | Department of Clinical Microbiology                                                              | GIGA Medical Genomics                                            | Keith Durkin et al          |
| EPI_ISL_418627 | Department of Clinical Microbiology                                                              | GIGA Medical Genomics                                            | Keith Durkin et al          |
| EPI_ISL_984269 | Platform BIS UZA/UAntwerpen                                                                      | UAntwerp, Laboratory of Medical Microbiology                     | Basil Britto Xavier et al   |
| EPI_ISL_418797 | KU Leuven, Clinical and Epidemiological Virology                                                 | KU Leuven, Clinical and Epidemiological Virology                 | Bert Vanmechelen et al      |
| EPI_ISL_464080 | KU Leuven, Rega Institute, Clinical and Epidemiological Virology                                 | KU Leuven, Rega Institute, Clinical and Epidemiological Virology | Tony Wawina-Bokalanga et al |
| EPI_ISL_476958 | KU Leuven, Rega Institute, Clinical and Epidemiological Virology                                 | KU Leuven, Rega Institute, Clinical and Epidemiological Virology | Tony Wawina-Bokalanga et al |
| EPI_ISL_734580 | UZ Leuven, National Reference Laboratory for Coronaviruses, Laboratory Medicine, Leuven, Belgium | KU Leuven, Rega Institute, Clinical and Epidemiological Virology | Tony Wawina-Bokalanga et al |
| EPI_ISL_734581 | UZ Leuven, National Reference Laboratory for Coronaviruses, Laboratory Medicine, Leuven, Belgium | KU Leuven, Rega Institute, Clinical and Epidemiological Virology | Tony Wawina-Bokalanga et al |
| EPI_ISL_734583 | UZ Leuven, National Reference Laboratory for Coronaviruses, Laboratory Medicine, Leuven, Belgium | KU Leuven, Rega Institute, Clinical and Epidemiological Virology | Tony Wawina-Bokalanga et al |
| EPI_ISL_734602 | UZ Leuven, National Reference Laboratory for Coronaviruses, Laboratory Medicine, Leuven, Belgium | KU Leuven, Rega Institute, Clinical and Epidemiological Virology | Tony Wawina-Bokalanga et al |
| EPI_ISL_734727 | UZ Leuven, National Reference Laboratory for Coronaviruses, Laboratory Medicine, Leuven, Belgium | KU Leuven, Rega Institute, Clinical and Epidemiological Virology | Tony Wawina-Bokalanga et al |
| EPI_ISL_734738 | UZ Leuven, National Reference Laboratory for Coronaviruses, Laboratory Medicine, Leuven, Belgium | KU Leuven, Rega Institute, Clinical and Epidemiological Virology | Tony Wawina-Bokalanga et al |
| EPI_ISL_734493 | UZ Leuven, National Reference Laboratory for Coronaviruses, Laboratory Medicine, Leuven, Belgium | KU Leuven, Rega Institute, Clinical and Epidemiological Virology | Tony Wawina-Bokalanga et al |
| EPI_ISL_734758 | UZ Leuven, National Reference Laboratory for Coronaviruses, Laboratory Medicine, Leuven, Belgium | KU Leuven, Rega Institute, Clinical and Epidemiological Virology | Tony Wawina-Bokalanga et al |
| EPI_ISL_738220 | UZ Leuven, National Reference Laboratory for Coronaviruses, Laboratory Medicine, Leuven, Belgium | KU Leuven, Rega Institute, Clinical and Epidemiological Virology | Tony Wawina-Bokalanga et al |
| EPI_ISL_734766 | UZ Leuven, National Reference Laboratory for Coronaviruses, Laboratory Medicine, Leuven, Belgium | KU Leuven, Rega Institute, Clinical and Epidemiological Virology | Tony Wawina-Bokalanga et al |
| EPI_ISL_734772 | UZ Leuven, National Reference Laboratory for Coronaviruses, Laboratory Medicine, Leuven, Belgium | KU Leuven, Rega Institute, Clinical and Epidemiological Virology | Tony Wawina-Bokalanga et al |
| EPI_ISL_734777 | UZ Leuven, National Reference Laboratory for Coronaviruses, Laboratory Medicine, Leuven, Belgium | KU Leuven, Rega Institute, Clinical and Epidemiological Virology | Tony Wawina-Bokalanga et al |
| EPI_ISL_734778 | UZ Leuven, National Reference Laboratory for Coronaviruses, Laboratory Medicine, Leuven, Belgium | KU Leuven, Rega Institute, Clinical and Epidemiological Virology | Tony Wawina-Bokalanga et al |









|                |                                                       |                                                                                |                         |
|----------------|-------------------------------------------------------|--------------------------------------------------------------------------------|-------------------------|
| EPI_ISL_837561 | Centro Nacional de Enfermedades Tropicales (CENETROP) | Laboratory of Respiratory Viruses and Measles, Oswaldo Cruz Institute, FIOCRUZ | Paola Resende et al     |
| EPI_ISL_837562 | Centro Nacional de Enfermedades Tropicales (CENETROP) | Laboratory of Respiratory Viruses and Measles, Oswaldo Cruz Institute, FIOCRUZ | Paola Resende et al     |
| EPI_ISL_837563 | Centro Nacional de Enfermedades Tropicales (CENETROP) | Laboratory of Respiratory Viruses and Measles, Oswaldo Cruz Institute, FIOCRUZ | Paola Resende et al     |
| EPI_ISL_837564 | Centro Nacional de Enfermedades Tropicales (CENETROP) | Laboratory of Respiratory Viruses and Measles, Oswaldo Cruz Institute, FIOCRUZ | Paola Resende et al     |
| EPI_ISL_837565 | Centro Nacional de Enfermedades Tropicales (CENETROP) | Laboratory of Respiratory Viruses and Measles, Oswaldo Cruz Institute, FIOCRUZ | Paola Resende et al     |
| EPI_ISL_837553 | Centro Nacional de Enfermedades Tropicales (CENETROP) | Laboratory of Respiratory Viruses and Measles, Oswaldo Cruz Institute, FIOCRUZ | Paola Resende et al     |
| EPI_ISL_837566 | Centro Nacional de Enfermedades Tropicales (CENETROP) | Laboratory of Respiratory Viruses and Measles, Oswaldo Cruz Institute, FIOCRUZ | Paola Resende et al     |
| EPI_ISL_837567 | Centro Nacional de Enfermedades Tropicales (CENETROP) | Laboratory of Respiratory Viruses and Measles, Oswaldo Cruz Institute, FIOCRUZ | Paola Resende et al     |
| EPI_ISL_837568 | Centro Nacional de Enfermedades Tropicales (CENETROP) | Laboratory of Respiratory Viruses and Measles, Oswaldo Cruz Institute, FIOCRUZ | Paola Resende et al     |
| EPI_ISL_837569 | Centro Nacional de Enfermedades Tropicales (CENETROP) | Laboratory of Respiratory Viruses and Measles, Oswaldo Cruz Institute, FIOCRUZ | Paola Resende et al     |
| EPI_ISL_837570 | Centro Nacional de Enfermedades Tropicales (CENETROP) | Laboratory of Respiratory Viruses and Measles, Oswaldo Cruz Institute, FIOCRUZ | Paola Resende et al     |
| EPI_ISL_837571 | Centro Nacional de Enfermedades Tropicales (CENETROP) | Laboratory of Respiratory Viruses and Measles, Oswaldo Cruz Institute, FIOCRUZ | Paola Resende et al     |
| EPI_ISL_837550 | Centro Nacional de Enfermedades Tropicales (CENETROP) | Laboratory of Respiratory Viruses and Measles, Oswaldo Cruz Institute, FIOCRUZ | Paola Resende et al     |
| EPI_ISL_837572 | Centro Nacional de Enfermedades Tropicales (CENETROP) | Laboratory of Respiratory Viruses and Measles, Oswaldo Cruz Institute, FIOCRUZ | Paola Resende et al     |
| EPI_ISL_837573 | Centro Nacional de Enfermedades Tropicales (CENETROP) | Laboratory of Respiratory Viruses and Measles, Oswaldo Cruz Institute, FIOCRUZ | Paola Resende et al     |
| EPI_ISL_837574 | Centro Nacional de Enfermedades Tropicales (CENETROP) | Laboratory of Respiratory Viruses and Measles, Oswaldo Cruz Institute, FIOCRUZ | Paola Resende et al     |
| EPI_ISL_837575 | Centro Nacional de Enfermedades Tropicales (CENETROP) | Laboratory of Respiratory Viruses and Measles, Oswaldo Cruz Institute, FIOCRUZ | Paola Resende et al     |
| EPI_ISL_837576 | Centro Nacional de Enfermedades Tropicales (CENETROP) | Laboratory of Respiratory Viruses and Measles, Oswaldo Cruz Institute, FIOCRUZ | Paola Resende et al     |
| EPI_ISL_837577 | Centro Nacional de Enfermedades Tropicales (CENETROP) | Laboratory of Respiratory Viruses and Measles, Oswaldo Cruz Institute, FIOCRUZ | Paola Resende et al     |
| EPI_ISL_837578 | Centro Nacional de Enfermedades Tropicales (CENETROP) | Laboratory of Respiratory Viruses and Measles, Oswaldo Cruz Institute, FIOCRUZ | Paola Resende et al     |
| EPI_ISL_462753 | University Clinical Hospital of Mostar                | University of Sarajevo Veterinary Faculty                                      | Goletic et al           |
| EPI_ISL_462990 | University Clinical Centre of the Republic of Srpska  | University of Sarajevo, Veterinary Faculty                                     | Teufik et al            |
| EPI_ISL_467300 | General Hospital "Abdulah Nakas"                      | Alea Genetic Center                                                            | Rijad Konjhodzic et al  |
| EPI_ISL_959650 | General Hospital "Abdulah Nakas" Sarajevo             | Alea Genetic Centre                                                            | Dino Pecar et al        |
| EPI_ISL_964882 | General Hospital "Abdulah Nakas" Sarajevo             | Alea Genetic Centre                                                            | Lana Salihefendic et al |
| EPI_ISL_722201 | Vitalis Mostar                                        | Alea Genetic Center                                                            | Salihefendic L. et al   |
| EPI_ISL_722209 | Dom Zdravlja Sarajevo                                 | Alea Genetic Center                                                            | Salihefendic L. et al   |
| EPI_ISL_910329 | ALEA dr Kandic                                        | Alea Genetic Centre                                                            | Rijad Konjhodzic et al  |
| EPI_ISL_922076 | General Hospital #Abdulah Nakas" Sarajevo             | Alea Genetic Centre                                                            | Rijad Konjhodzic et al  |



|                |                                                               |                                                                                |                                   |
|----------------|---------------------------------------------------------------|--------------------------------------------------------------------------------|-----------------------------------|
| EPI_ISL_770471 | National Health laboratory                                    | Botswana Institute for Technology Research and Innovation                      | Kefentse Arnold Tumedí et al      |
| EPI_ISL_770472 | National Health laboratory                                    | Botswana Institute for Technology Research and Innovation                      | Kefentse Arnold Tumedí et al      |
| EPI_ISL_940844 | Botswana Harvard HIV Reference Laboratory                     | Botswana Harvard HIV Reference Laboratory                                      | Sikhulile Moyo et al              |
| EPI_ISL_965178 | Botswana Harvard HIV Reference Laboratory                     | Botswana Harvard AIDS Institute Partnership                                    | Sikhulile Moyo et al              |
| EPI_ISL_962886 | Botswana Harvard HIV Reference Laboratory                     | Botswana Harvard HIV Reference Laboratory                                      | Sikhulile Moyo et al              |
| EPI_ISL_560386 | National Health Laboratory                                    | Botswana Institute for Technology Research and innovation                      | Kefentse Arnold Tumedí et al      |
| EPI_ISL_560390 | National Health Laboratory                                    | Botswana Institute for Technology Research and Innovation                      | Kefentse Arnold Tumedí et al      |
| EPI_ISL_560385 | National Health Laboratory                                    | Botswana Institute for Technology Research and Innovation                      | Kefentse Arnold Tumedí et al      |
| EPI_ISL_560387 | National Health Laboratory                                    | Botswana Institute for Technology Research and Innovation                      | Kefentse Arnold Tumedí et al      |
| EPI_ISL_560389 | National Health Laboratory                                    | Botswana Institute for Technology Research and Innovation                      | Kefentse Arnold Tumedí et al      |
| EPI_ISL_560388 | National Health Laboratory                                    | Botswana Institute for Technology Research and Innovation                      | Kefentse Arnold Tumedí et al      |
| EPI_ISL_965181 | Botswana Harvard HIV Reference Laboratory                     | Botswana Harvard HIV Reference Laboratory                                      | Sikhulile Moyo et al              |
| EPI_ISL_965277 | Botswana Harvard HIV Reference Laboratory                     | Botswana Harvard HIV Reference Laboratory                                      | Sikhulile Moyo et al              |
| EPI_ISL_935040 | Botswana Harvard HIV Reference Laboratory                     | Botswana Harvard HIV Reference Laboratory                                      | Sikhulile Moyo et al              |
| EPI_ISL_935042 | Botswana Harvard HIV Reference Laboratory                     | Botswana Harvard HIV Reference Laboratory                                      | Sikhulile Moyo et al              |
| EPI_ISL_935045 | Botswana Harvard HIV Reference Laboratory                     | Botswana Harvard HIV Reference Laboratory                                      | Sikhulile Moyo et al              |
| EPI_ISL_940768 | Botswana Harvard HIV Reference Laboratory                     | Botswana Harvard HIV Reference Laboratory                                      | Sikhulile Moyo et al              |
| EPI_ISL_940776 | Botswana Harvard HIV Reference Laboratory                     | Botswana Harvard HIV Reference Laboratory                                      | Sikhulile Moyo et al              |
| EPI_ISL_968214 | Botswana Harvard HIV Reference Laboratory                     | Botswana Harvard HIV Reference Laboratory                                      | Sikhulile Moyo et al              |
| EPI_ISL_770473 | National Health laboratory                                    | Botswana Institute for Technology Research and Innovation                      | Kefentse Arnold Tumedí et al      |
| EPI_ISL_968857 | Botswana Harvard HIV Reference Laboratory                     | Botswana Harvard HIV Reference Laboratory                                      | Sikhulile Moyo et al              |
| EPI_ISL_940765 | Botswana Harvard HIV Reference Laboratory                     | Botswana Harvard HIV Reference Laboratory                                      | Sikhulile Moyo et al              |
| EPI_ISL_940762 | Botswana Harvard HIV Reference Laboratory                     | Botswana Harvard HIV Reference Laboratory                                      | Sikhulile Moyo et al              |
| EPI_ISL_871872 | Botswana Harvard HIV Reference Laboratory                     | Botswana Harvard HIV Reference Laboratory                                      | Sikhulile Moyo et al              |
| EPI_ISL_933724 | Botswana Harvard HIV Reference Laboratory                     | Botswana Harvard HIV Reference Laboratory                                      | Sikhulile Moyo et al              |
| EPI_ISL_831474 | Laboratório de Microbiologia Molecular - Universidade FEEVALE | Universidade Federal de Ciências da Saúde de Porto Alegre                      | Vinícius Bonetti Franceschi et al |
| EPI_ISL_848599 | Evandro Chagas Institute                                      | Evandro Chagas Institute                                                       | Santos et al                      |
| EPI_ISL_848602 | Evandro Chagas Institute                                      | Evandro Chagas Institute                                                       | Santos et al                      |
| EPI_ISL_458139 | Evandro Chagas Institute                                      | Evandro Chagas Institute                                                       | Santos et al                      |
| EPI_ISL_848600 | Evandro Chagas Institute                                      | Evandro Chagas Institute                                                       | Santos et al                      |
| EPI_ISL_848601 | Evandro Chagas Institute                                      | Evandro Chagas Institute                                                       | Santos et al                      |
| EPI_ISL_848627 | Evandro Chagas Institute                                      | Evandro Chagas Institute                                                       | Santos et al                      |
| EPI_ISL_848573 | Evandro Chagas Institute                                      | Evandro Chagas Institute                                                       | Santos et al                      |
| EPI_ISL_848574 | Evandro Chagas Institute                                      | Evandro Chagas Institute                                                       | Santos et al                      |
| EPI_ISL_848612 | Evandro Chagas Institute                                      | Evandro Chagas Institute                                                       | Santos et al                      |
| EPI_ISL_848613 | Evandro Chagas Institute                                      | Evandro Chagas Institute                                                       | Santos et al                      |
| EPI_ISL_792639 | LACEN-AL                                                      | Laboratory of Respiratory Viruses and Measles, Oswaldo Cruz Institute, FIOCRUZ | Paola Resende et al               |
| EPI_ISL_792640 | LACEN-AL                                                      | Laboratory of Respiratory Viruses and Measles, Oswaldo Cruz Institute, FIOCRUZ | Paola Resende et al               |

|                |                                                                                                                    |                                                                                                                    |                              |
|----------------|--------------------------------------------------------------------------------------------------------------------|--------------------------------------------------------------------------------------------------------------------|------------------------------|
| EPI_ISL_792641 | LACEN-AL                                                                                                           | Laboratory of Respiratory Viruses and Measles, Oswaldo Cruz Institute, FIOCRUZ                                     | Paola Resende et al          |
| EPI_ISL_792642 | LACEN-AL                                                                                                           | Laboratory of Respiratory Viruses and Measles, Oswaldo Cruz Institute, FIOCRUZ                                     | Paola Resende et al          |
| EPI_ISL_792643 | LACEN-AL                                                                                                           | Laboratory of Respiratory Viruses and Measles, Oswaldo Cruz Institute, FIOCRUZ                                     | Paola Resende et al          |
| EPI_ISL_792644 | LACEN-AL                                                                                                           | Laboratory of Respiratory Viruses and Measles, Oswaldo Cruz Institute, FIOCRUZ                                     | Paola Resende et al          |
| EPI_ISL_427292 | LACEN-AL - Laboratorio Central de Alagoas                                                                          | Instituto Oswaldo Cruz FIOCRUZ - Laboratory of Respiratory Viruses and Measles (LVRS)                              | Paola Resende et al          |
| EPI_ISL_417034 | Laboratorio de Ecologia de Doencas Transmissiveis na Amazonia, Instituto Leonidas e Maria Deane - Fiocruz Amazonia | Laboratorio de Ecologia de Doencas Transmissiveis na Amazonia, Instituto Leonidas e Maria Deane - Fiocruz Amazonia | Valdinete Nascimento et al   |
| EPI_ISL_470568 | Hermes Pardini                                                                                                     | Bioinformatics Laboratory / LNCC                                                                                   | Alexandra Gerber et al       |
| EPI_ISL_470569 | Hermes Pardini                                                                                                     | Bioinformatics Laboratory / LNCC                                                                                   | Alexandra Gerber et al       |
| EPI_ISL_470570 | Hermes Pardini                                                                                                     | Bioinformatics Laboratory / LNCC                                                                                   | Alexandra Gerber et al       |
| EPI_ISL_470571 | Hermes Pardini                                                                                                     | Bioinformatics Laboratory / LNCC                                                                                   | Alexandra Gerber et al       |
| EPI_ISL_470572 | Hermes Pardini                                                                                                     | Bioinformatics Laboratory / LNCC                                                                                   | Alexandra Gerber et al       |
| EPI_ISL_906075 | Hospital Geral de Vila Penteado Dr Jose Pangella Sao Paulo                                                         | Instituto Adolfo Lutz, Interdisciplinary Procedures Center, Strategic Laboratory                                   | Claudio Tavares Sacchi et al |
| EPI_ISL_906069 | Instituto Adolfo Lutz - Regional de Campinas                                                                       | Instituto Adolfo Lutz, Interdisciplinary Procedures Center, Strategic Laboratory                                   | Claudio Tavares Sacchi et al |
| EPI_ISL_906076 | Hospital Sao Luiz Sao Caetano                                                                                      | Instituto Adolfo Lutz, Interdisciplinary Procedures Center, Strategic Laboratory                                   | Claudio Tavares Sacchi et al |
| EPI_ISL_906077 | Hospital Sao Luiz Sao Caetano                                                                                      | Instituto Adolfo Lutz, Interdisciplinary Procedures Center, Strategic Laboratory                                   | Claudio Tavares Sacchi et al |
| EPI_ISL_906070 | UPA Dr. Akira Tada                                                                                                 | Instituto Adolfo Lutz, Interdisciplinary Procedures Center, Strategic Laboratory                                   | Claudio Tavares Sacchi et al |
| EPI_ISL_906080 | Hospital Beneficiencia Portuguesa                                                                                  | Instituto Adolfo Lutz, Interdisciplinary Procedures Center, Strategic Laboratory                                   | Claudio Tavares Sacchi et al |
| EPI_ISL_906081 | Hospital Beneficiencia Portuguesa                                                                                  | Instituto Adolfo Lutz, Interdisciplinary Procedures Center, Strategic Laboratory                                   | Claudio Tavares Sacchi et al |
| EPI_ISL_940614 | LACEN-PI DR. Costa Alvarenga                                                                                       | Instituto Adolfo Lutz, Interdisciplinary Procedures Center, Strategic Laboratory                                   | Claudio Tavares Sacchi et al |
| EPI_ISL_940615 | LACEN-PI DR. Costa Alvarenga                                                                                       | Instituto Adolfo Lutz, Interdisciplinary Procedures Center, Strategic Laboratory                                   | Claudio Tavares Sacchi et al |
| EPI_ISL_940616 | LACEN-PI DR. Costa Alvarenga                                                                                       | Instituto Adolfo Lutz, Interdisciplinary Procedures Center, Strategic Laboratory                                   | Claudio Tavares Sacchi et al |
| EPI_ISL_906071 | LACEN-PI DR. Costa Alvarenga                                                                                       | Instituto Adolfo Lutz, Interdisciplinary Procedures Center, Strategic Laboratory                                   | Claudio Tavares Sacchi et al |
| EPI_ISL_940617 | LACEN-PI DR. Costa Alvarenga                                                                                       | Instituto Adolfo Lutz, Interdisciplinary Procedures Center, Strategic Laboratory                                   | Claudio Tavares Sacchi et al |
| EPI_ISL_940618 | LACEN-PI DR. Costa Alvarenga                                                                                       | Instituto Adolfo Lutz, Interdisciplinary Procedures Center, Strategic Laboratory                                   | Claudio Tavares Sacchi et al |
| EPI_ISL_940620 | Hospital Sao Joaquim - Beneficiencia Portuguesa                                                                    | Instituto Adolfo Lutz, Interdisciplinary Procedures Center, Strategic Laboratory                                   | Claudio Tavares Sacchi et al |
| EPI_ISL_940623 | Hospital Sao Joaquim - Beneficiencia Portuguesa                                                                    | Instituto Adolfo Lutz, Interdisciplinary Procedures Center, Strategic Laboratory                                   | Claudio Tavares Sacchi et al |
| EPI_ISL_940624 | Hospital Sao Joaquim - Beneficiencia Portuguesa                                                                    | Instituto Adolfo Lutz, Interdisciplinary Procedures Center, Strategic Laboratory                                   | Claudio Tavares Sacchi et al |











|                |                                                                         |                                                                                                  |                                    |
|----------------|-------------------------------------------------------------------------|--------------------------------------------------------------------------------------------------|------------------------------------|
| EPI_ISL_978511 | Central Public Health Laboratory - LACEN -Bahia, Salvador, Brazil       | Central Public Health Laboratory - LACEN -Bahia, Salvador, Brazil                                | Stephane Tosta et al               |
| EPI_ISL_978512 | Central Public Health Laboratory - LACEN -Bahia, Salvador, Brazil       | Central Public Health Laboratory - LACEN -Bahia, Salvador, Brazil                                | Stephane Tosta et al               |
| EPI_ISL_978513 | Central Public Health Laboratory - LACEN -Bahia, Salvador, Brazil       | Central Public Health Laboratory - LACEN -Bahia, Salvador, Brazil                                | Stephane Tosta et al               |
| EPI_ISL_978514 | Central Public Health Laboratory - LACEN -Bahia, Salvador, Brazil       | Central Public Health Laboratory - LACEN -Bahia, Salvador, Brazil                                | Stephane Tosta et al               |
| EPI_ISL_978488 | Central Public Health Laboratory - LACEN -Bahia, Salvador, Brazil       | Central Public Health Laboratory - LACEN -Bahia, Salvador, Brazil                                | Stephane Tosta et al               |
| EPI_ISL_978515 | Central Public Health Laboratory - LACEN -Bahia, Salvador, Brazil       | Central Public Health Laboratory - LACEN -Bahia, Salvador, Brazil                                | Stephane Tosta et al               |
| EPI_ISL_978516 | Central Public Health Laboratory - LACEN -Bahia, Salvador, Brazil       | Central Public Health Laboratory - LACEN -Bahia, Salvador, Brazil                                | Stephane Tosta et al               |
| EPI_ISL_415105 | Laboratório Central de Saúde Pública Professor Gonçalo Moniz – LACEN/BA | Instituto Oswaldo Cruz FIOCRUZ - Laboratory of Respiratory Viruses and Measles (LVRS)            | Paola Resende et al                |
| EPI_ISL_978517 | Central Public Health Laboratory - LACEN -Bahia, Salvador, Brazil       | Central Public Health Laboratory - LACEN -Bahia, Salvador, Brazil                                | Stephane Tosta et al               |
| EPI_ISL_978518 | Central Public Health Laboratory - LACEN -Bahia, Salvador, Brazil       | Central Public Health Laboratory - LACEN -Bahia, Salvador, Brazil                                | Stephane Tosta et al               |
| EPI_ISL_978519 | Central Public Health Laboratory - LACEN -Bahia, Salvador, Brazil       | Central Public Health Laboratory - LACEN -Bahia, Salvador, Brazil                                | Stephane Tosta et al               |
| EPI_ISL_978520 | Central Public Health Laboratory - LACEN -Bahia, Salvador, Brazil       | Central Public Health Laboratory - LACEN -Bahia, Salvador, Brazil                                | Stephane Tosta et al               |
| EPI_ISL_978521 | Central Public Health Laboratory - LACEN -Bahia, Salvador, Brazil       | Central Public Health Laboratory - LACEN -Bahia, Salvador, Brazil                                | Stephane Tosta et al               |
| EPI_ISL_978522 | Central Public Health Laboratory - LACEN -Bahia, Salvador, Brazil       | Central Public Health Laboratory - LACEN -Bahia, Salvador, Brazil                                | Stephane Tosta et al               |
| EPI_ISL_978523 | Central Public Health Laboratory - LACEN -Bahia, Salvador, Brazil       | Central Public Health Laboratory - LACEN -Bahia, Salvador, Brazil                                | Stephane Tosta et al               |
| EPI_ISL_978524 | Central Public Health Laboratory - LACEN -Bahia, Salvador, Brazil       | Central Public Health Laboratory - LACEN -Bahia, Salvador, Brazil                                | Stephane Tosta et al               |
| EPI_ISL_978489 | Central Public Health Laboratory - LACEN -Bahia, Salvador, Brazil       | Central Public Health Laboratory - LACEN -Bahia, Salvador, Brazil                                | Stephane Tosta et al               |
| EPI_ISL_978525 | Central Public Health Laboratory - LACEN -Bahia, Salvador, Brazil       | Central Public Health Laboratory - LACEN -Bahia, Salvador, Brazil                                | Stephane Tosta et al               |
| EPI_ISL_978526 | Central Public Health Laboratory - LACEN -Bahia, Salvador, Brazil       | Central Public Health Laboratory - LACEN -Bahia, Salvador, Brazil                                | Stephane Tosta et al               |
| EPI_ISL_978527 | Central Public Health Laboratory - LACEN -Bahia, Salvador, Brazil       | Central Public Health Laboratory - LACEN -Bahia, Salvador, Brazil                                | Stephane Tosta et al               |
| EPI_ISL_978528 | Central Public Health Laboratory - LACEN -Bahia, Salvador, Brazil       | Central Public Health Laboratory - LACEN -Bahia, Salvador, Brazil                                | Stephane Tosta et al               |
| EPI_ISL_978529 | Central Public Health Laboratory - LACEN -Bahia, Salvador, Brazil       | Central Public Health Laboratory - LACEN -Bahia, Salvador, Brazil                                | Stephane Tosta et al               |
| EPI_ISL_978530 | Central Public Health Laboratory - LACEN -Bahia, Salvador, Brazil       | Central Public Health Laboratory - LACEN -Bahia, Salvador, Brazil                                | Stephane Tosta et al               |
| EPI_ISL_978531 | Central Public Health Laboratory - LACEN -Bahia, Salvador, Brazil       | Central Public Health Laboratory - LACEN -Bahia, Salvador, Brazil                                | Stephane Tosta et al               |
| EPI_ISL_978532 | Central Public Health Laboratory - LACEN -Bahia, Salvador, Brazil       | Central Public Health Laboratory - LACEN -Bahia, Salvador, Brazil                                | Stephane Tosta et al               |
| EPI_ISL_978533 | Central Public Health Laboratory - LACEN -Bahia, Salvador, Brazil       | Central Public Health Laboratory - LACEN -Bahia, Salvador, Brazil                                | Stephane Tosta et al               |
| EPI_ISL_978490 | Central Public Health Laboratory - LACEN -Bahia, Salvador, Brazil       | Central Public Health Laboratory - LACEN -Bahia, Salvador, Brazil                                | Stephane Tosta et al               |
| EPI_ISL_427293 | LACEN-BA - Laboratório Central de Saúde Pública Professor Gonçalo Moniz | Instituto Oswaldo Cruz FIOCRUZ - Laboratory of Respiratory Viruses and Measles (LVRS)            | Paola Resende et al                |
| EPI_ISL_978491 | Central Public Health Laboratory - LACEN -Bahia, Salvador, Brazil       | Central Public Health Laboratory - LACEN -Bahia, Salvador, Brazil                                | Stephane Tosta et al               |
| EPI_ISL_978492 | Central Public Health Laboratory - LACEN -Bahia, Salvador, Brazil       | Central Public Health Laboratory - LACEN -Bahia, Salvador, Brazil                                | Stephane Tosta et al               |
| EPI_ISL_978493 | Central Public Health Laboratory - LACEN -Bahia, Salvador, Brazil       | Central Public Health Laboratory - LACEN -Bahia, Salvador, Brazil                                | Stephane Tosta et al               |
| EPI_ISL_978494 | Central Public Health Laboratory - LACEN -Bahia, Salvador, Brazil       | Central Public Health Laboratory - LACEN -Bahia, Salvador, Brazil                                | Stephane Tosta et al               |
| EPI_ISL_476304 | DB Diagnósticos do Brasil                                               | Instituto de Medicina Tropical da Univesidade de São Paulo                                       | Samples: Nelson Gaburo Jr et al    |
| EPI_ISL_476305 | DB Diagnósticos do Brasil                                               | Instituto de Medicina Tropical da Univesidade de São Paulo                                       | Samples: Nelson Gaburo Jr et al    |
| EPI_ISL_722138 | DB Diagnosticos do Brasil                                               | Laboratório de Parasitologia Médica - Instituto de Medicina Tropical - Universidade de São Paulo | Discovery Diagnosis Genomics et al |
| EPI_ISL_470573 | Hermes Pardini                                                          | Bioinformatics Laboratory / LNCC                                                                 | Alexandra Gerber et al             |
| EPI_ISL_918536 | LACEN - Laboratório Central de Saúde Pública do Ceara                   | Evandro Chagas Institute                                                                         | Santos et al                       |
| EPI_ISL_918537 | LACEN - Laboratório Central de Saúde Pública do Ceara                   | Evandro Chagas Institute                                                                         | Santos et al                       |

|                |                                                                                       |                                                                                                  |                                                                   |
|----------------|---------------------------------------------------------------------------------------|--------------------------------------------------------------------------------------------------|-------------------------------------------------------------------|
| EPI_ISL_918538 | LACEN - Laboratório Central de Saúde Pública do Ceara                                 | Evandro Chagas Institute                                                                         | Santos et al                                                      |
| EPI_ISL_918539 | LACEN - Laboratório Central de Saúde Pública do Ceara                                 | Evandro Chagas Institute                                                                         | Santos et al                                                      |
| EPI_ISL_918540 | LACEN - Laboratório Central de Saúde Pública do Ceara                                 | Evandro Chagas Institute                                                                         | Santos et al                                                      |
| EPI_ISL_918541 | LACEN - Laboratório Central de Saúde Pública do Ceara                                 | Evandro Chagas Institute                                                                         | Santos et al                                                      |
| EPI_ISL_918542 | LACEN - Laboratório Central de Saúde Pública do Ceara                                 | Evandro Chagas Institute                                                                         | Santos et al                                                      |
| EPI_ISL_918543 | LACEN - Laboratório Central de Saúde Pública do Ceara                                 | Evandro Chagas Institute                                                                         | Santos et al                                                      |
| EPI_ISL_918544 | LACEN - Laboratório Central de Saúde Pública do Ceara                                 | Evandro Chagas Institute                                                                         | Santos et al                                                      |
| EPI_ISL_476182 | DB Diagnósticos do Brasil                                                             | Instituto de Medicina Tropical da Univesidade de São Paulo                                       | Samples: Nelson Gaburo Jr et al                                   |
| EPI_ISL_476184 | DB Diagnósticos do Brasil                                                             | Instituto de Medicina Tropical da Univesidade de São Paulo                                       | Samples: Nelson Gaburo Jr et al                                   |
| EPI_ISL_476200 | DB Diagnósticos do Brasil                                                             | Instituto de Medicina Tropical da Univesidade de São Paulo                                       | Samples: Nelson Gaburo Jr et al                                   |
| EPI_ISL_476218 | DB Diagnósticos do Brasil                                                             | Instituto de Medicina Tropical da Univesidade de São Paulo                                       | Samples: Nelson Gaburo Jr et al                                   |
| EPI_ISL_476281 | DB Diagnósticos do Brasil                                                             | Instituto de Medicina Tropical da Univesidade de São Paulo                                       | Samples: Nelson Gaburo Jr et al                                   |
| EPI_ISL_476283 | DB Diagnósticos do Brasil                                                             | Instituto de Medicina Tropical da Univesidade de São Paulo                                       | Samples: Nelson Gaburo Jr et al                                   |
| EPI_ISL_476288 | DB Diagnósticos do Brasil                                                             | Instituto de Medicina Tropical da Univesidade de São Paulo                                       | Samples: Nelson Gaburo Jr et al                                   |
| EPI_ISL_476289 | DB Diagnósticos do Brasil                                                             | Instituto de Medicina Tropical da Univesidade de São Paulo                                       | Samples: Nelson Gaburo Jr et al                                   |
| EPI_ISL_476307 | DB Diagnósticos do Brasil                                                             | Instituto de Medicina Tropical da Univesidade de São Paulo                                       | Samples: Nelson Gaburo Jr et al                                   |
| EPI_ISL_476331 | DB Diagnósticos do Brasil                                                             | Instituto de Medicina Tropical da Univesidade de São Paulo                                       | Samples: Nelson Gaburo Jr et al                                   |
| EPI_ISL_476369 | DB Diagnósticos do Brasil                                                             | Instituto de Medicina Tropical da Univesidade de São Paulo                                       | Samples: Nelson Gaburo Jr et al                                   |
| EPI_ISL_722139 | DB Diagnosticos do Brasil                                                             | Laboratório de Parasitologia Médica - Instituto de Medicina Tropical - Universidade de São Paulo | Brazilian Center for Arbovirus Discovery Diagnosis Genomics et al |
| EPI_ISL_426580 | Instituto Sabin                                                                       | Laboratory of Virology                                                                           | Fernando L Melo et al                                             |
| EPI_ISL_882663 | LACEN do Estado do Piaui, Dr. Costa Alvarenga                                         | Instituto Adolfo Lutz, Interdisciplinary Procedures Center, Strategic Laboratory                 | Claudio Tavares Sacchi et al                                      |
| EPI_ISL_882664 | LACEN do Estado do Piaui, Dr. Costa Alvarenga                                         | Instituto Adolfo Lutz, Interdisciplinary Procedures Center, Strategic Laboratory                 | Claudio Tavares Sacchi et al                                      |
| EPI_ISL_882657 | LACEN do Estado do Piaui, Dr. Costa Alvarenga                                         | Instituto Adolfo Lutz, Interdisciplinary Procedures Center, Strategic Laboratory                 | Claudio Tavares Sacchi et al                                      |
| EPI_ISL_427294 | Instituto Oswaldo Cruz FIOCRUZ - Laboratory of Respiratory Viruses and Measles (LVRS) | Instituto Oswaldo Cruz FIOCRUZ - Laboratory of Respiratory Viruses and Measles (LVRS)            | Paola Resende et al                                               |
| EPI_ISL_427295 | Instituto Oswaldo Cruz FIOCRUZ - Laboratory of Respiratory Viruses and Measles (LVRS) | Instituto Oswaldo Cruz FIOCRUZ - Laboratory of Respiratory Viruses and Measles (LVRS)            | Paola Resende et al                                               |
| EPI_ISL_427296 | Instituto Oswaldo Cruz FIOCRUZ - Laboratory of Respiratory Viruses and Measles (LVRS) | Instituto Oswaldo Cruz FIOCRUZ - Laboratory of Respiratory Viruses and Measles (LVRS)            | Paola Resende et al                                               |
| EPI_ISL_427297 | Instituto Oswaldo Cruz FIOCRUZ - Laboratory of Respiratory Viruses and Measles (LVRS) | Instituto Oswaldo Cruz FIOCRUZ - Laboratory of Respiratory Viruses and Measles (LVRS)            | Paola Resende et al                                               |
| EPI_ISL_427298 | Instituto Oswaldo Cruz FIOCRUZ - Laboratory of Respiratory Viruses and Measles (LVRS) | Instituto Oswaldo Cruz FIOCRUZ - Laboratory of Respiratory Viruses and Measles (LVRS)            | Paola Resende et al                                               |
| EPI_ISL_415128 | LACEN/ES - Laboratório Central de Saúde Pública do Espírito Santo                     | Instituto Oswaldo Cruz FIOCRUZ - Laboratory of Respiratory Viruses and Measles (LVRS)            | Paola Resende et al                                               |
| EPI_ISL_722136 | DB Diagnosticos do Brasil                                                             | Laboratório de Parasitologia Médica - Instituto de Medicina Tropical - Universidade de São Paulo | Brazilian Center for Arbovirus Discovery Diagnosis Genomics et al |
| EPI_ISL_470574 | Hermes Pardini                                                                        | Bioinformatics Laboratory / LNCC                                                                 | Alexandra Gerber et al                                            |
| EPI_ISL_470575 | Hermes Pardini                                                                        | Bioinformatics Laboratory / LNCC                                                                 | Alexandra Gerber et al                                            |
| EPI_ISL_470576 | Hermes Pardini                                                                        | Bioinformatics Laboratory / LNCC                                                                 | Alexandra Gerber et al                                            |
| EPI_ISL_470577 | Hermes Pardini                                                                        | Bioinformatics Laboratory / LNCC                                                                 | Alexandra Gerber et al                                            |

|                |                                                                  |                                                                                                  |                                                                                                     |
|----------------|------------------------------------------------------------------|--------------------------------------------------------------------------------------------------|-----------------------------------------------------------------------------------------------------|
| EPI_ISL_882661 | Hospital de Santa Barbara de Goias                               | Instituto Adolfo Lutz, Interdisciplinary Procedures Center, Strategic Laboratory                 | Claudio Tavares Sacchi et al                                                                        |
| EPI_ISL_882662 | Hospital de Santa Barbara de Goias                               | Instituto Adolfo Lutz, Interdisciplinary Procedures Center, Strategic Laboratory                 | Claudio Tavares Sacchi et al                                                                        |
| EPI_ISL_940612 | Hospital de Campanha para Enfrentamento do Coronavirus - Goiania | Instituto Adolfo Lutz, Interdisciplinary Procedures Center, Strategic Laboratory                 | Claudio Tavares Sacchi et al                                                                        |
| EPI_ISL_943988 | LACEN do Estado de Goias                                         | Instituto Adolfo Lutz, Interdisciplinary Procedures Center, Strategic Laboratory                 | Claudio Tavares Sacchi et al                                                                        |
| EPI_ISL_943989 | LACEN do Estado de Goias                                         | Instituto Adolfo Lutz, Interdisciplinary Procedures Center, Strategic Laboratory                 | Claudio Tavares Sacchi et al                                                                        |
| EPI_ISL_476333 | DB Diagnósticos do Brasil                                        | Instituto de Medicina Tropical da Univesidade de São Paulo                                       | Samples: Nelson Gaburo Jr et al                                                                     |
| EPI_ISL_476336 | DB Diagnósticos do Brasil                                        | Instituto de Medicina Tropical da Univesidade de São Paulo                                       | Samples: Nelson Gaburo Jr et al                                                                     |
| EPI_ISL_524797 | Evandro Chagas Institute                                         | Evandro Chagas Institute                                                                         | Santos et al                                                                                        |
| EPI_ISL_848626 | Evandro Chagas Institute                                         | Evandro Chagas Institute                                                                         | Santos et al                                                                                        |
| EPI_ISL_524791 | Evandro Chagas Institute                                         | Evandro Chagas Institute                                                                         | Santos et al                                                                                        |
| EPI_ISL_458149 | Evandro Chagas Institute                                         | Evandro Chagas Institute                                                                         | Santos et al                                                                                        |
| EPI_ISL_524788 | Evandro Chagas Institute                                         | Evandro Chagas Institute                                                                         | Santos et al                                                                                        |
| EPI_ISL_524790 | Evandro Chagas Institute                                         | Evandro Chagas Institute                                                                         | Santos et al                                                                                        |
| EPI_ISL_524794 | Evandro Chagas Institute                                         | Evandro Chagas Institute                                                                         | Santos et al                                                                                        |
| EPI_ISL_524789 | Evandro Chagas Institute                                         | Evandro Chagas Institute                                                                         | Santos et al                                                                                        |
| EPI_ISL_524799 | Evandro Chagas Institute                                         | Evandro Chagas Institute                                                                         | Santos et al                                                                                        |
| EPI_ISL_848580 | Evandro Chagas Institute                                         | Evandro Chagas Institute                                                                         | Santos et al                                                                                        |
| EPI_ISL_848581 | Evandro Chagas Institute                                         | Evandro Chagas Institute                                                                         | Santos et al                                                                                        |
| EPI_ISL_476309 | DB Diagnósticos do Brasil                                        | Instituto de Medicina Tropical da Univesidade de São Paulo                                       | Samples: Nelson Gaburo Jr et al                                                                     |
| EPI_ISL_476327 | DB Diagnósticos do Brasil                                        | Instituto de Medicina Tropical da Univesidade de São Paulo                                       | Samples: Nelson Gaburo Jr et al                                                                     |
| EPI_ISL_476328 | DB Diagnósticos do Brasil                                        | Instituto de Medicina Tropical da Univesidade de São Paulo                                       | Samples: Nelson Gaburo Jr et al                                                                     |
| EPI_ISL_476329 | DB Diagnósticos do Brasil                                        | Instituto de Medicina Tropical da Univesidade de São Paulo                                       | Samples: Nelson Gaburo Jr et al                                                                     |
| EPI_ISL_476330 | DB Diagnósticos do Brasil                                        | Instituto de Medicina Tropical da Univesidade de São Paulo                                       | Samples: Nelson Gaburo Jr et al                                                                     |
| EPI_ISL_672666 | DB Diagnosticos do Brasil                                        | Laboratório de Parasitologia Médica - Instituto de Medicina Tropical - Universidade de São Paulo | Sample: Nelson Gaburo Jr et al<br>Brazil-UK Centre for Arbovirus<br>Discovery Diagnosis Genomics et |
| EPI_ISL_672667 | DB Diagnosticos do Brasil                                        | Laboratório de Parasitologia Médica - Instituto de Medicina Tropical - Universidade de São Paulo | Discovery Diagnosis Genomics et<br>Brazil-UK Centre for Arbovirus                                   |
| EPI_ISL_722146 | DB Diagnosticos do Brasil                                        | Laboratório de Parasitologia Médica - Instituto de Medicina Tropical - Universidade de São Paulo | Discovery Diagnosis Genomics et<br>Brazil-UK Centre for Arbovirus                                   |
| EPI_ISL_722140 | DB Diagnosticos do Brasil                                        | Laboratório de Parasitologia Médica - Instituto de Medicina Tropical - Universidade de São Paulo | Discovery Diagnosis Genomics et<br>al                                                               |
| EPI_ISL_623104 | Simile Medicina Diagnóstica                                      | Bioinformatics Laboratory / LNCC                                                                 | Carolina M Voloch et al                                                                             |
| EPI_ISL_623105 | Simile Medicina Diagnóstica                                      | Bioinformatics Laboratory / LNCC                                                                 | Carolina M Voloch et al                                                                             |
| EPI_ISL_417925 | Laboratório Simili                                               | Bioinformatics Laboratory / LNCC                                                                 | Filipe Romero et al                                                                                 |
| EPI_ISL_417949 | Laboratório Hermes Pardini                                       | Bioinformatics Laboratory - LNCC                                                                 | Filipe Romero et al                                                                                 |
| EPI_ISL_470578 | Hermes Pardini                                                   | Bioinformatics Laboratory / LNCC                                                                 | Alexandra Gerber et al                                                                              |
| EPI_ISL_470579 | Hermes Pardini                                                   | Bioinformatics Laboratory / LNCC                                                                 | Alexandra Gerber et al                                                                              |
| EPI_ISL_470580 | Hermes Pardini                                                   | Bioinformatics Laboratory / LNCC                                                                 | Alexandra Gerber et al                                                                              |
| EPI_ISL_470581 | Hermes Pardini                                                   | Bioinformatics Laboratory / LNCC                                                                 | Alexandra Gerber et al                                                                              |



|                |                                                                                                              |                                                                                                  |                                                                   |
|----------------|--------------------------------------------------------------------------------------------------------------|--------------------------------------------------------------------------------------------------|-------------------------------------------------------------------|
| EPI_ISL_429671 | Central Public Health Laboratory/Octávio Magalhães Institute (IOM) from the Ezequiel Dias Foundation (FUNED) | Instituto Octávio Magalhães / Fundação Ezequiel Dias (IOM/Funed)                                 | Talita Adelino et al                                              |
| EPI_ISL_429672 | Central Public Health Laboratory/Octávio Magalhães Institute (IOM) from the Ezequiel Dias Foundation (FUNED) | Instituto Octávio Magalhães / Fundação Ezequiel Dias (IOM/Funed)                                 | Talita Adelino et al                                              |
| EPI_ISL_476179 | DB Diagnósticos do Brasil                                                                                    | Instituto de Medicina Tropical da Univesidade de São Paulo                                       | Samples: Nelson Gaburo Jr et al                                   |
| EPI_ISL_476194 | DB Diagnósticos do Brasil                                                                                    | Instituto de Medicina Tropical da Univesidade de São Paulo                                       | Samples: Nelson Gaburo Jr et al                                   |
| EPI_ISL_904018 | DB Diagnosticos do Brasil                                                                                    | Laboratório de Parasitologia Médica - Instituto de Medicina Tropical - Universidade de São Paulo | Discovery Diagnosis Genomics et al                                |
| EPI_ISL_672672 | DB Diagnosticos do Brasil                                                                                    | Laboratório de Parasitologia Médica - Instituto de Medicina Tropical - Universidade de São Paulo | Brazil-UK Centre for Arbovirus Discovery Diagnosis Genomics et al |
| EPI_ISL_904024 | DB Diagnosticos do Brasil                                                                                    | Laboratório de Parasitologia Médica - Instituto de Medicina Tropical - Universidade de São Paulo | Brazil-UK Centre for Arbovirus Discovery Diagnosis Genomics et al |
| EPI_ISL_904025 | DB Diagnosticos do Brasil                                                                                    | Laboratório de Parasitologia Médica - Instituto de Medicina Tropical - Universidade de São Paulo | Brazil-UK Centre for Arbovirus Discovery Diagnosis Genomics et al |
| EPI_ISL_904026 | DB Diagnosticos do Brasil                                                                                    | Laboratório de Parasitologia Médica - Instituto de Medicina Tropical - Universidade de São Paulo | Brazil-UK Centre for Arbovirus Discovery Diagnosis Genomics et al |
| EPI_ISL_904027 | DB Diagnosticos do Brasil                                                                                    | Laboratório de Parasitologia Médica - Instituto de Medicina Tropical - Universidade de São Paulo | Brazil-UK Centre for Arbovirus Discovery Diagnosis Genomics et al |
| EPI_ISL_904028 | DB Diagnosticos do Brasil                                                                                    | Laboratório de Parasitologia Médica - Instituto de Medicina Tropical - Universidade de São Paulo | Brazil-UK Centre for Arbovirus Discovery Diagnosis Genomics et al |
| EPI_ISL_904029 | DB Diagnosticos do Brasil                                                                                    | Laboratório de Parasitologia Médica - Instituto de Medicina Tropical - Universidade de São Paulo | Brazil-UK Centre for Arbovirus Discovery Diagnosis Genomics et al |
| EPI_ISL_672670 | DB Diagnosticos do Brasil                                                                                    | Laboratório de Parasitologia Médica - Instituto de Medicina Tropical - Universidade de São Paulo | Brazil-UK Centre for Arbovirus Discovery Diagnosis Genomics et al |
| EPI_ISL_672675 | DB Diagnosticos do Brasil                                                                                    | Laboratório de Parasitologia Médica - Instituto de Medicina Tropical - Universidade de São Paulo | Brazil-UK Centre for Arbovirus Discovery Diagnosis Genomics et al |
| EPI_ISL_672679 | DB Diagnosticos do Brasil                                                                                    | Laboratório de Parasitologia Médica - Instituto de Medicina Tropical - Universidade de São Paulo | Brazil-UK Centre for Arbovirus Discovery Diagnosis Genomics et al |
| EPI_ISL_470599 | Hermes Pardini                                                                                               | Bioinformatics Laboratory / LNCC                                                                 | Alexandra Gerber et al                                            |
| EPI_ISL_476290 | DB Diagnósticos do Brasil                                                                                    | Instituto de Medicina Tropical da Univesidade de São Paulo                                       | Samples: Nelson Gaburo Jr et al                                   |
| EPI_ISL_470600 | Hermes Pardini                                                                                               | Bioinformatics Laboratory / LNCC                                                                 | Alexandra Gerber et al                                            |
| EPI_ISL_470601 | Hermes Pardini                                                                                               | Bioinformatics Laboratory / LNCC                                                                 | Alexandra Gerber et al                                            |
| EPI_ISL_470602 | Hermes Pardini                                                                                               | Bioinformatics Laboratory / LNCC                                                                 | Alexandra Gerber et al                                            |
| EPI_ISL_470603 | Hermes Pardini                                                                                               | Bioinformatics Laboratory / LNCC                                                                 | Alexandra Gerber et al                                            |
| EPI_ISL_470604 | Hermes Pardini                                                                                               | Bioinformatics Laboratory / LNCC                                                                 | Alexandra Gerber et al                                            |
| EPI_ISL_470605 | Hermes Pardini                                                                                               | Bioinformatics Laboratory / LNCC                                                                 | Alexandra Gerber et al                                            |
| EPI_ISL_470606 | Hermes Pardini                                                                                               | Bioinformatics Laboratory / LNCC                                                                 | Alexandra Gerber et al                                            |
| EPI_ISL_470608 | Hermes Pardini                                                                                               | Bioinformatics Laboratory / LNCC                                                                 | Alexandra Gerber et al                                            |
| EPI_ISL_470609 | Hermes Pardini                                                                                               | Bioinformatics Laboratory / LNCC                                                                 | Alexandra Gerber et al                                            |
| EPI_ISL_470610 | Hermes Pardini                                                                                               | Bioinformatics Laboratory / LNCC                                                                 | Alexandra Gerber et al                                            |
| EPI_ISL_470611 | Hermes Pardini                                                                                               | Bioinformatics Laboratory / LNCC                                                                 | Alexandra Gerber et al                                            |
| EPI_ISL_918514 | Evandro Chagas Institute                                                                                     | Evandro Chagas Institute                                                                         | Santos et al                                                      |
| EPI_ISL_918515 | LACEN - Laboratório Central de Saúde Pública do Para                                                         | Evandro Chagas Institute                                                                         | Santos et al                                                      |
| EPI_ISL_918516 | LACEN - Laboratório Central de Saúde Pública do Para                                                         | Evandro Chagas Institute                                                                         | Santos et al                                                      |
| EPI_ISL_918517 | LACEN - Laboratório Central de Saúde Pública do Para                                                         | Evandro Chagas Institute                                                                         | Santos et al                                                      |













|                |                          |                                                                                |                                     |
|----------------|--------------------------|--------------------------------------------------------------------------------|-------------------------------------|
| EPI_ISL_792635 | LACEN-PB                 | Laboratory of Respiratory Viruses and Measles, Oswaldo Cruz Institute, FIOCRUZ | Paola Resende et al                 |
| EPI_ISL_792636 | LACEN-PB                 | Laboratory of Respiratory Viruses and Measles, Oswaldo Cruz Institute, FIOCRUZ | Paola Resende et al                 |
| EPI_ISL_792637 | LACEN-PB                 | Laboratory of Respiratory Viruses and Measles, Oswaldo Cruz Institute, FIOCRUZ | Paola Resende et al                 |
| EPI_ISL_792638 | LACEN-PB                 | Laboratory of Respiratory Viruses and Measles, Oswaldo Cruz Institute, FIOCRUZ | Paola Resende et al                 |
| EPI_ISL_524801 | Evandro Chagas Institute | Evandro Chagas Institute                                                       | Santos et al                        |
| EPI_ISL_470612 | Hermes Pardini           | Bioinformatics Laboratory / LNCC                                               | Alexandra Gerber et al              |
| EPI_ISL_502779 | LACEN/PE                 | LABBE, Federal University of Pernambuco                                        | WILSON JOSE DA SILVA JUNIOR et al   |
| EPI_ISL_502875 | LACEN/PE                 | LABBE, Federal University of Pernambuco                                        | WILSON JOSE DA SILVA JUNIOR et al   |
| EPI_ISL_861889 | Genomika Einstein        | LATE - Laboratório de Técnicas Especiais - Hospital Israelita Albert Einstein  | Deyvid Amgarten et al               |
| EPI_ISL_861911 | Genomika Einstein        | LATE - Laboratório de Técnicas Especiais - Hospital Israelita Albert Einstein  | Deyvid Amgarten et al               |
| EPI_ISL_861914 | Genomika Einstein        | LATE - Laboratório de Técnicas Especiais - Hospital Israelita Albert Einstein  | Deyvid Amgarten et al               |
| EPI_ISL_500460 | LACEN/PE                 | WallauLab, Aggeu Magalhaes Institute                                           | Marcelo Henrique Santos Paiva et al |
| EPI_ISL_500461 | LACEN/PE                 | WallauLab, Aggeu Magalhaes Institute                                           | Marcelo Henrique Santos Paiva et al |
| EPI_ISL_572373 | LACEN/PE                 | WallauLab, Aggeu Magalhaes Institute                                           | Marcelo Henrique Santos Paiva et al |
| EPI_ISL_500462 | LACEN/PE                 | WallauLab, Aggeu Magalhaes Institute                                           | Marcelo Henrique Santos Paiva et al |
| EPI_ISL_572374 | LACEN/PE                 | WallauLab, Aggeu Magalhaes Institute                                           | Marcelo Henrique Santos Paiva et al |
| EPI_ISL_572375 | LACEN/PE                 | WallauLab, Aggeu Magalhaes Institute                                           | Marcelo Henrique Santos Paiva et al |
| EPI_ISL_572334 | LACEN/PE                 | WallauLab, Aggeu Magalhaes Institute                                           | Marcelo Henrique Santos Paiva et al |
| EPI_ISL_572379 | LACEN/PE                 | WallauLab, Aggeu Magalhaes Institute                                           | Marcelo Henrique Santos Paiva et al |
| EPI_ISL_572380 | LACEN/PE                 | WallauLab, Aggeu Magalhaes Institute                                           | Marcelo Henrique Santos Paiva et al |
| EPI_ISL_572381 | LACEN/PE                 | WallauLab, Aggeu Magalhaes Institute                                           | Marcelo Henrique Santos Paiva et al |
| EPI_ISL_572382 | LACEN/PE                 | WallauLab, Aggeu Magalhaes Institute                                           | Marcelo Henrique Santos Paiva et al |
| EPI_ISL_572384 | LACEN/PE                 | WallauLab, Aggeu Magalhaes Institute                                           | Marcelo Henrique Santos Paiva et al |
| EPI_ISL_572385 | LACEN/PE                 | WallauLab, Aggeu Magalhaes Institute                                           | Marcelo Henrique Santos Paiva et al |
| EPI_ISL_572386 | LACEN/PE                 | WallauLab, Aggeu Magalhaes Institute                                           | Marcelo Henrique Santos Paiva et al |
| EPI_ISL_572388 | LACEN/PE                 | WallauLab, Aggeu Magalhaes Institute                                           | Marcelo Henrique Santos Paiva et al |
| EPI_ISL_500463 | LACEN/PE                 | WallauLab, Aggeu Magalhaes Institute                                           | Marcelo Henrique Santos Paiva et al |
| EPI_ISL_500464 | LACEN/PE                 | WallauLab, Aggeu Magalhaes Institute                                           | Marcelo Henrique Santos Paiva et al |
| EPI_ISL_572394 | LACEN/PE                 | WallauLab, Aggeu Magalhaes Institute                                           | Marcelo Henrique Santos Paiva et al |
| EPI_ISL_572396 | LACEN/PE                 | WallauLab, Aggeu Magalhaes Institute                                           | Marcelo Henrique Santos Paiva et al |
| EPI_ISL_500465 | LACEN/PE                 | WallauLab, Aggeu Magalhaes Institute                                           | Marcelo Henrique Santos Paiva et al |
| EPI_ISL_500865 | LACEN/PE                 | WallauLab, Aggeu Magalhaes Institute                                           | Marcelo Henrique Santos Paiva et al |
| EPI_ISL_500466 | LACEN/PE                 | WallauLab, Aggeu Magalhaes Institute                                           | Marcelo Henrique Santos Paiva et al |
| EPI_ISL_500866 | LACEN/PE                 | WallauLab, Aggeu Magalhaes Institute                                           | Marcelo Henrique Santos Paiva et al |
| EPI_ISL_500867 | LACEN/PE                 | WallauLab, Aggeu Magalhaes Institute                                           | Marcelo Henrique Santos Paiva et al |
| EPI_ISL_500868 | LACEN/PE                 | WallauLab, Aggeu Magalhaes Institute                                           | Marcelo Henrique Santos Paiva et al |



|                |                              |                                                                                                  |                                                                   |
|----------------|------------------------------|--------------------------------------------------------------------------------------------------|-------------------------------------------------------------------|
| EPI_ISL_572360 | LACEN/PE                     | WallauLab, Aggeu Magalhaes Institute                                                             | Marcelo Henrique Santos Paiva et al                               |
| EPI_ISL_572361 | LACEN/PE                     | WallauLab, Aggeu Magalhaes Institute                                                             | Marcelo Henrique Santos Paiva et al                               |
| EPI_ISL_572362 | LACEN/PE                     | WallauLab, Aggeu Magalhaes Institute                                                             | Marcelo Henrique Santos Paiva et al                               |
| EPI_ISL_572363 | LACEN/PE                     | WallauLab, Aggeu Magalhaes Institute                                                             | Marcelo Henrique Santos Paiva et al                               |
| EPI_ISL_572366 | LACEN/PE                     | WallauLab, Aggeu Magalhaes Institute                                                             | Marcelo Henrique Santos Paiva et al                               |
| EPI_ISL_572367 | LACEN/PE                     | WallauLab, Aggeu Magalhaes Institute                                                             | Marcelo Henrique Santos Paiva et al                               |
| EPI_ISL_572371 | LACEN/PE                     | WallauLab, Aggeu Magalhaes Institute                                                             | Marcelo Henrique Santos Paiva et al                               |
| EPI_ISL_572372 | LACEN/PE                     | WallauLab, Aggeu Magalhaes Institute                                                             | Marcelo Henrique Santos Paiva et al                               |
| EPI_ISL_476359 | DB Diagnósticos do Brasil    | Instituto de Medicina Tropical da Univesidade de São Paulo                                       | Samuel Nelson Galvão Jr et al                                     |
| EPI_ISL_672681 | DB Diagnosticos do Brasil    | Laboratório de Parasitologia Médica - Instituto de Medicina Tropical - Universidade de São Paulo | Discovery Diagnosis Genomics et al                                |
| EPI_ISL_722148 | DB Diagnosticos do Brasil    | Laboratório de Parasitologia Médica - Instituto de Medicina Tropical - Universidade de São Paulo | Brazil-UK Centre for Arbovirus Discovery Diagnosis Genomics et al |
| EPI_ISL_470613 | Hermes Pardini               | Bioinformatics Laboratory / LNCC                                                                 | Alexandra Gerber et al                                            |
| EPI_ISL_940613 | LACEN-PI DR. Costa Alvarenga | Instituto Adolfo Lutz, Interdisciplinary Procedures Center, Strategic Laboratory                 | Claudio Tavares Sacchi et al                                      |
| EPI_ISL_470614 | Hermes Pardini               | Bioinformatics Laboratory / LNCC                                                                 | Alexandra Gerber et al                                            |
| EPI_ISL_792645 | LACEN-PR                     | Laboratory of Respiratory Viruses and Measles, Oswaldo Cruz Institute, FIOCRUZ                   | Paola Resende et al                                               |
| EPI_ISL_792646 | LACEN-PR                     | Laboratory of Respiratory Viruses and Measles, Oswaldo Cruz Institute, FIOCRUZ                   | Paola Resende et al                                               |
| EPI_ISL_792647 | LACEN-PR                     | Laboratory of Respiratory Viruses and Measles, Oswaldo Cruz Institute, FIOCRUZ                   | Paola Resende et al                                               |
| EPI_ISL_792648 | LACEN-PR                     | Laboratory of Respiratory Viruses and Measles, Oswaldo Cruz Institute, FIOCRUZ                   | Paola Resende et al                                               |
| EPI_ISL_792649 | LACEN-PR                     | Laboratory of Respiratory Viruses and Measles, Oswaldo Cruz Institute, FIOCRUZ                   | Paola Resende et al                                               |
| EPI_ISL_792650 | LACEN-PR                     | Laboratory of Respiratory Viruses and Measles, Oswaldo Cruz Institute, FIOCRUZ                   | Paola Resende et al                                               |
| EPI_ISL_792651 | LACEN-PR                     | Laboratory of Respiratory Viruses and Measles, Oswaldo Cruz Institute, FIOCRUZ                   | Paola Resende et al                                               |
| EPI_ISL_792652 | LACEN-PR                     | Laboratory of Respiratory Viruses and Measles, Oswaldo Cruz Institute, FIOCRUZ                   | Paola Resende et al                                               |
| EPI_ISL_792653 | LACEN-PR                     | Laboratory of Respiratory Viruses and Measles, Oswaldo Cruz Institute, FIOCRUZ                   | Paola Resende et al                                               |
| EPI_ISL_792654 | LACEN-PR                     | Laboratory of Respiratory Viruses and Measles, Oswaldo Cruz Institute, FIOCRUZ                   | Paola Resende et al                                               |
| EPI_ISL_541340 | LACEN/PR                     | Laboratory of Respiratory Viruses and Measles, Oswaldo Cruz Institute, FIOCRUZ                   | Paola Resende et al                                               |
| EPI_ISL_541341 | LACEN/PR                     | Laboratory of Respiratory Viruses and Measles, Oswaldo Cruz Institute, FIOCRUZ                   | Paola Resende et al                                               |
| EPI_ISL_541342 | LACEN/PR                     | Laboratory of Respiratory Viruses and Measles, Oswaldo Cruz Institute, FIOCRUZ                   | Paola Resende et al                                               |
| EPI_ISL_541343 | LACEN/PR                     | Laboratory of Respiratory Viruses and Measles, Oswaldo Cruz Institute, FIOCRUZ                   | Paola Resende et al                                               |
| EPI_ISL_541344 | LACEN/PR                     | Laboratory of Respiratory Viruses and Measles, Oswaldo Cruz Institute, FIOCRUZ                   | Paola Resende et al                                               |



|                |                                                              |                                                                                                  |                                                                   |
|----------------|--------------------------------------------------------------|--------------------------------------------------------------------------------------------------|-------------------------------------------------------------------|
| EPI_ISL_541345 | LACEN/PR                                                     | Laboratory of Respiratory Viruses and Measles, Oswaldo Cruz Institute, FIOCRUZ                   | Paola Resende et al                                               |
| EPI_ISL_541346 | LACEN/PR                                                     | Laboratory of Respiratory Viruses and Measles, Oswaldo Cruz Institute, FIOCRUZ                   | Paola Resende et al                                               |
| EPI_ISL_476191 | DB Diagnósticos do Brasil                                    | Instituto de Medicina Tropical da Univesidade de São Paulo                                       | Samples: Nelson Gaburo Jr et al                                   |
| EPI_ISL_476282 | DB Diagnósticos do Brasil                                    | Instituto de Medicina Tropical da Univesidade de São Paulo                                       | Samples: Nelson Gaburo Jr et al                                   |
| EPI_ISL_476311 | DB Diagnósticos do Brasil                                    | Instituto de Medicina Tropical da Univesidade de São Paulo                                       | Samples: Nelson Gaburo Jr et al                                   |
| EPI_ISL_476312 | DB Diagnósticos do Brasil                                    | Instituto de Medicina Tropical da Univesidade de São Paulo                                       | Samples: Nelson Gaburo Jr et al                                   |
| EPI_ISL_476313 | DB Diagnósticos do Brasil                                    | Instituto de Medicina Tropical da Univesidade de São Paulo                                       | Samples: Nelson Gaburo Jr et al                                   |
| EPI_ISL_476314 | DB Diagnósticos do Brasil                                    | Instituto de Medicina Tropical da Univesidade de São Paulo                                       | Samples: Nelson Gaburo Jr et al                                   |
| EPI_ISL_476318 | DB Diagnósticos do Brasil                                    | Instituto de Medicina Tropical da Univesidade de São Paulo                                       | Samples: Nelson Gaburo Jr et al                                   |
| EPI_ISL_476370 | DB Diagnósticos do Brasil                                    | Instituto de Medicina Tropical da Univesidade de São Paulo                                       | Samples: Nelson Gaburo Jr et al                                   |
| EPI_ISL_722134 | DB Diagnosticos do Brasil                                    | Laboratório de Parasitologia Médica - Instituto de Medicina Tropical - Universidade de São Paulo | Brazil-UK Centre for Arbovirus Discovery Diagnosis Genomics et al |
| EPI_ISL_722137 | DB Diagnosticos do Brasil                                    | Laboratório de Parasitologia Médica - Instituto de Medicina Tropical - Universidade de São Paulo | Brazil-UK Centre for Arbovirus Discovery Diagnosis Genomics et al |
| EPI_ISL_722135 | DB Diagnosticos do Brasil                                    | Laboratório de Parasitologia Médica - Instituto de Medicina Tropical - Universidade de São Paulo | Brazil-UK Centre for Arbovirus Discovery Diagnosis Genomics et al |
| EPI_ISL_722149 | DB Diagnosticos do Brasil                                    | Laboratório de Parasitologia Médica - Instituto de Medicina Tropical - Universidade de São Paulo | Brazil-UK Centre for Arbovirus Discovery Diagnosis Genomics et al |
| EPI_ISL_510535 | Molecular Virology, Instituto Carlos Chagas / Fiocruz Paraná | Universidade Federal do Parana (UFPR)                                                            | Suzukawa et al                                                    |
| EPI_ISL_623106 | Laboratorio de Virologia Molecular / UFRJ                    | Bioinformatics Laboratory / LNCC                                                                 | Carolina M Voloch et al                                           |
| EPI_ISL_623107 | Laboratorio de Virologia Molecular / UFRJ                    | Bioinformatics Laboratory / LNCC                                                                 | Carolina M Voloch et al                                           |
| EPI_ISL_623108 | Laboratorio de Virologia Molecular / UFRJ                    | Bioinformatics Laboratory / LNCC                                                                 | Carolina M Voloch et al                                           |
| EPI_ISL_623110 | Laboratorio de Virologia Molecular / UFRJ                    | Bioinformatics Laboratory / LNCC                                                                 | Carolina M Voloch et al                                           |
| EPI_ISL_623111 | Laboratorio de Virologia Molecular / UFRJ                    | Bioinformatics Laboratory / LNCC                                                                 | Carolina M Voloch et al                                           |
| EPI_ISL_623112 | Laboratorio de Virologia Molecular / UFRJ                    | Bioinformatics Laboratory / LNCC                                                                 | Carolina M Voloch et al                                           |
| EPI_ISL_623113 | Laboratorio de Virologia Molecular / UFRJ                    | Bioinformatics Laboratory / LNCC                                                                 | Carolina M Voloch et al                                           |
| EPI_ISL_623114 | Laboratorio de Virologia Molecular / UFRJ                    | Bioinformatics Laboratory / LNCC                                                                 | Carolina M Voloch et al                                           |
| EPI_ISL_623116 | Laboratorio de Virologia Molecular / UFRJ                    | Bioinformatics Laboratory / LNCC                                                                 | Carolina M Voloch et al                                           |
| EPI_ISL_623117 | Laboratorio de Virologia Molecular / UFRJ                    | Bioinformatics Laboratory / LNCC                                                                 | Carolina M Voloch et al                                           |
| EPI_ISL_623118 | Laboratorio de Virologia Molecular / UFRJ                    | Bioinformatics Laboratory / LNCC                                                                 | Carolina M Voloch et al                                           |
| EPI_ISL_623119 | Laboratorio de Virologia Molecular / UFRJ                    | Bioinformatics Laboratory / LNCC                                                                 | Carolina M Voloch et al                                           |
| EPI_ISL_623120 | Laboratorio de Virologia Molecular / UFRJ                    | Bioinformatics Laboratory / LNCC                                                                 | Carolina M Voloch et al                                           |
| EPI_ISL_623121 | Laboratorio de Virologia Molecular / UFRJ                    | Bioinformatics Laboratory / LNCC                                                                 | Carolina M Voloch et al                                           |
| EPI_ISL_623122 | Laboratorio de Virologia Molecular / UFRJ                    | Bioinformatics Laboratory / LNCC                                                                 | Carolina M Voloch et al                                           |
| EPI_ISL_623123 | Laboratorio de Virologia Molecular / UFRJ                    | Bioinformatics Laboratory / LNCC                                                                 | Carolina M Voloch et al                                           |
| EPI_ISL_623124 | Laboratorio de Virologia Molecular / UFRJ                    | Bioinformatics Laboratory / LNCC                                                                 | Carolina M Voloch et al                                           |
| EPI_ISL_623125 | Laboratorio de Virologia Molecular / UFRJ                    | Bioinformatics Laboratory / LNCC                                                                 | Carolina M Voloch et al                                           |
| EPI_ISL_623126 | Laboratorio de Virologia Molecular / UFRJ                    | Bioinformatics Laboratory / LNCC                                                                 | Carolina M Voloch et al                                           |
| EPI_ISL_623127 | Laboratorio de Virologia Molecular / UFRJ                    | Bioinformatics Laboratory / LNCC                                                                 | Carolina M Voloch et al                                           |
| EPI_ISL_623128 | Laboratorio de Virologia Molecular / UFRJ                    | Bioinformatics Laboratory / LNCC                                                                 | Carolina M Voloch et al                                           |











|                |                                                           |                                                           |                         |
|----------------|-----------------------------------------------------------|-----------------------------------------------------------|-------------------------|
| EPI_ISL_717947 | Laboratorio de Virologia Molecular / UFRJ                 | Bioinformatics Laboratory / LNCC                          | Carolina M Voloch et al |
| EPI_ISL_717948 | Laboratorio de Virologia Molecular / UFRJ                 | Bioinformatics Laboratory / LNCC                          | Carolina M Voloch et al |
| EPI_ISL_717949 | Laboratorio de Virologia Molecular / UFRJ                 | Bioinformatics Laboratory / LNCC                          | Carolina M Voloch et al |
| EPI_ISL_717950 | Laboratorio de Virologia Molecular / UFRJ                 | Bioinformatics Laboratory / LNCC                          | Carolina M Voloch et al |
| EPI_ISL_717951 | Laboratorio de Virologia Molecular / UFRJ                 | Bioinformatics Laboratory / LNCC                          | Carolina M Voloch et al |
| EPI_ISL_717952 | Laboratorio de Virologia Molecular / UFRJ                 | Bioinformatics Laboratory / LNCC                          | Carolina M Voloch et al |
| EPI_ISL_717953 | Laboratorio de Virologia Molecular / UFRJ                 | Bioinformatics Laboratory / LNCC                          | Carolina M Voloch et al |
| EPI_ISL_717954 | Laboratorio de Virologia Molecular / UFRJ                 | Bioinformatics Laboratory / LNCC                          | Carolina M Voloch et al |
| EPI_ISL_717955 | Laboratorio de Virologia Molecular / UFRJ                 | Bioinformatics Laboratory / LNCC                          | Carolina M Voloch et al |
| EPI_ISL_717956 | Laboratorio de Virologia Molecular / UFRJ                 | Bioinformatics Laboratory / LNCC                          | Carolina M Voloch et al |
| EPI_ISL_717957 | Laboratorio de Virologia Molecular / UFRJ                 | Bioinformatics Laboratory / LNCC                          | Carolina M Voloch et al |
| EPI_ISL_717958 | LACEN Dr. Francisco Rimolo Neto                           | Bioinformatics Laboratory / LNCC                          | Carolina M Voloch et al |
| EPI_ISL_717959 | Laboratorio de Virologia Molecular / UFRJ                 | Bioinformatics Laboratory / LNCC                          | Carolina M Voloch et al |
| EPI_ISL_717960 | Laboratorio de Virologia Molecular / UFRJ                 | Bioinformatics Laboratory / LNCC                          | Carolina M Voloch et al |
| EPI_ISL_717961 | Laboratorio de Virologia Molecular / UFRJ                 | Bioinformatics Laboratory / LNCC                          | Carolina M Voloch et al |
| EPI_ISL_717962 | LACEN RJ - Noel Nutels                                    | Bioinformatics Laboratory / LNCC                          | Carolina M Voloch et al |
| EPI_ISL_717963 | LACEN Dr. Francisco Rimolo Neto                           | Bioinformatics Laboratory / LNCC                          | Carolina M Voloch et al |
| EPI_ISL_717964 | LACEN Dr. Francisco Rimolo Neto                           | Bioinformatics Laboratory / LNCC                          | Carolina M Voloch et al |
| EPI_ISL_636834 | Laboratório de Imunofarmacologia - Instituto Oswaldo Cruz | Laboratório de Imunofarmacologia - Instituto Oswaldo Cruz | Souza et al             |
| EPI_ISL_636835 | Laboratório de Imunofarmacologia - Instituto Oswaldo Cruz | Laboratório de Imunofarmacologia - Instituto Oswaldo Cruz | Souza et al             |
| EPI_ISL_418959 | Universidade Federal do Rio de Janeiro - UFRJ             | Bioinformatics Laboratory - LNCC                          | Filipe Romero et al     |
| EPI_ISL_417982 | Universidade Federal do Rio de Janeiro                    | Bioinformatics Laboratory - LNCC                          | Filipe Romero et al     |
| EPI_ISL_470615 | Laboratorio de Virologia Molecular / UFRJ                 | Bioinformatics Laboratory / LNCC                          | Alexandra Gerber et al  |
| EPI_ISL_470616 | Laboratorio de Virologia Molecular / UFRJ                 | Bioinformatics Laboratory / LNCC                          | Alexandra Gerber et al  |
| EPI_ISL_470617 | Laboratorio de Virologia Molecular / UFRJ                 | Bioinformatics Laboratory / LNCC                          | Alexandra Gerber et al  |
| EPI_ISL_470618 | Laboratorio de Virologia Molecular / UFRJ                 | Bioinformatics Laboratory / LNCC                          | Alexandra Gerber et al  |
| EPI_ISL_470619 | Laboratorio de Virologia Molecular / UFRJ                 | Bioinformatics Laboratory / LNCC                          | Alexandra Gerber et al  |
| EPI_ISL_470620 | Laboratorio de Virologia Molecular / UFRJ                 | Bioinformatics Laboratory / LNCC                          | Alexandra Gerber et al  |
| EPI_ISL_470621 | Laboratorio de Virologia Molecular / UFRJ                 | Bioinformatics Laboratory / LNCC                          | Alexandra Gerber et al  |
| EPI_ISL_470622 | Laboratorio de Virologia Molecular / UFRJ                 | Bioinformatics Laboratory / LNCC                          | Alexandra Gerber et al  |
| EPI_ISL_470623 | Laboratorio de Virologia Molecular / UFRJ                 | Bioinformatics Laboratory / LNCC                          | Alexandra Gerber et al  |
| EPI_ISL_470624 | Laboratorio de Virologia Molecular / UFRJ                 | Bioinformatics Laboratory / LNCC                          | Alexandra Gerber et al  |
| EPI_ISL_470625 | Laboratorio de Virologia Molecular / UFRJ                 | Bioinformatics Laboratory / LNCC                          | Alexandra Gerber et al  |
| EPI_ISL_470626 | Laboratorio de Virologia Molecular / UFRJ                 | Bioinformatics Laboratory / LNCC                          | Alexandra Gerber et al  |
| EPI_ISL_470627 | Laboratorio de Virologia Molecular / UFRJ                 | Bioinformatics Laboratory / LNCC                          | Alexandra Gerber et al  |
| EPI_ISL_470628 | Laboratorio de Virologia Molecular / UFRJ                 | Bioinformatics Laboratory / LNCC                          | Alexandra Gerber et al  |
| EPI_ISL_470629 | Laboratorio de Virologia Molecular / UFRJ                 | Bioinformatics Laboratory / LNCC                          | Alexandra Gerber et al  |
| EPI_ISL_470630 | Laboratorio de Virologia Molecular / UFRJ                 | Bioinformatics Laboratory / LNCC                          | Alexandra Gerber et al  |
| EPI_ISL_470631 | Laboratorio de Virologia Molecular / UFRJ                 | Bioinformatics Laboratory / LNCC                          | Alexandra Gerber et al  |















|                |                                                         |                                                                                                                                                                |                                                                       |
|----------------|---------------------------------------------------------|----------------------------------------------------------------------------------------------------------------------------------------------------------------|-----------------------------------------------------------------------|
| EPI_ISL_513568 | Programa de Oncovirologia, Instituto Nacional de Câncer | Programa de Oncovirologia, Instituto Nacional de Câncer                                                                                                        | Juliana D. Siqueira et al                                             |
| EPI_ISL_513569 | Programa de Oncovirologia, Instituto Nacional de Câncer | Programa de Oncovirologia, Instituto Nacional de Câncer                                                                                                        | Juliana D. Siqueira et al                                             |
| EPI_ISL_513570 | Programa de Oncovirologia, Instituto Nacional de Câncer | Programa de Oncovirologia, Instituto Nacional de Câncer                                                                                                        | Juliana D. Siqueira et al                                             |
| EPI_ISL_513571 | Programa de Oncovirologia, Instituto Nacional de Câncer | Programa de Oncovirologia, Instituto Nacional de Câncer                                                                                                        | Juliana D. Siqueira et al                                             |
| EPI_ISL_513572 | Programa de Oncovirologia, Instituto Nacional de Câncer | Programa de Oncovirologia, Instituto Nacional de Câncer                                                                                                        | Juliana D. Siqueira et al                                             |
| EPI_ISL_513573 | Programa de Oncovirologia, Instituto Nacional de Câncer | Programa de Oncovirologia, Instituto Nacional de Câncer                                                                                                        | Juliana D. Siqueira et al                                             |
| EPI_ISL_513574 | Programa de Oncovirologia, Instituto Nacional de Câncer | Programa de Oncovirologia, Instituto Nacional de Câncer                                                                                                        | Juliana D. Siqueira et al                                             |
| EPI_ISL_513575 | Programa de Oncovirologia, Instituto Nacional de Câncer | Programa de Oncovirologia, Instituto Nacional de Câncer                                                                                                        | Juliana D. Siqueira et al                                             |
| EPI_ISL_513576 | Programa de Oncovirologia, Instituto Nacional de Câncer | Programa de Oncovirologia, Instituto Nacional de Câncer                                                                                                        | Juliana D. Siqueira et al                                             |
| EPI_ISL_513577 | Programa de Oncovirologia, Instituto Nacional de Câncer | Programa de Oncovirologia, Instituto Nacional de Câncer                                                                                                        | Juliana D. Siqueira et al                                             |
| EPI_ISL_513578 | Programa de Oncovirologia, Instituto Nacional de Câncer | Programa de Oncovirologia, Instituto Nacional de Câncer                                                                                                        | Juliana D. Siqueira et al                                             |
| EPI_ISL_513579 | Programa de Oncovirologia, Instituto Nacional de Câncer | Programa de Oncovirologia, Instituto Nacional de Câncer                                                                                                        | Juliana D. Siqueira et al                                             |
| EPI_ISL_513580 | Programa de Oncovirologia, Instituto Nacional de Câncer | Programa de Oncovirologia, Instituto Nacional de Câncer                                                                                                        | Juliana D. Siqueira et al                                             |
| EPI_ISL_513581 | Programa de Oncovirologia, Instituto Nacional de Câncer | Programa de Oncovirologia, Instituto Nacional de Câncer                                                                                                        | Juliana D. Siqueira et al                                             |
| EPI_ISL_513582 | Programa de Oncovirologia, Instituto Nacional de Câncer | Programa de Oncovirologia, Instituto Nacional de Câncer                                                                                                        | Juliana D. Siqueira et al                                             |
| EPI_ISL_513583 | Programa de Oncovirologia, Instituto Nacional de Câncer | Programa de Oncovirologia, Instituto Nacional de Câncer                                                                                                        | Juliana D. Siqueira et al                                             |
| EPI_ISL_476178 | DB Diagnósticos do Brasil                               | Instituto de Medicina Tropical da Univesidade de São Paulo                                                                                                     | Samples: Nelson Gaburo Jr et al                                       |
| EPI_ISL_476180 | DB Diagnósticos do Brasil                               | Instituto de Medicina Tropical da Univesidade de São Paulo                                                                                                     | Samples: Nelson Gaburo Jr et al                                       |
| EPI_ISL_476210 | DB Diagnósticos do Brasil                               | Instituto de Medicina Tropical da Univesidade de São Paulo<br>Laboratório de Parasitologia Médica - Instituto de Medicina Tropical - Universidade de São Paulo | Samples: Nelson Gaburo Jr et al<br>Discovery Diagnosis Genomics et al |
| EPI_ISL_722147 | DB Diagnosticos do Brasil                               |                                                                                                                                                                | Gustavo M. Romário M. de Souza et al                                  |
| EPI_ISL_528539 | LVM/UFRJ                                                | LNCC                                                                                                                                                           |                                                                       |
| EPI_ISL_528637 | LVM/UFRJ                                                | Bioinformatics Laboratory / LNCC                                                                                                                               | Gustavo D. P. Silva et al                                             |
| EPI_ISL_528638 | LVM/UFRJ                                                | Bioinformatics Laboratory / LNCC                                                                                                                               | Gustavo D. P. Silva et al                                             |
| EPI_ISL_492032 | Instituto de Biologia do Exército                       | Laboratório de Metabolismo Macromolecular FirminoTorres de Castro, Instituto de Biofísica Carlos Chagas Filho, Universidade Federal do Rio de Janeiro          | Bianca Catarina Azevedo Cabral et al                                  |
| EPI_ISL_492038 | Instituto de Biologia do Exército                       | Laboratório de Metabolismo Macromolecular FirminoTorres de Castro, Instituto de Biofísica Carlos Chagas Filho, Universidade Federal do Rio de Janeiro          | Bianca Catarina Azevedo Cabral et al                                  |
| EPI_ISL_492039 | Instituto de Biologia do Exército                       | Laboratório de Metabolismo Macromolecular FirminoTorres de Castro, Instituto de Biofísica Carlos Chagas Filho, Universidade Federal do Rio de Janeiro          | Bianca Catarina Azevedo Cabral et al                                  |
| EPI_ISL_492033 | Instituto de Biologia do Exército                       | Laboratório de Metabolismo Macromolecular FirminoTorres de Castro, Instituto de Biofísica Carlos Chagas Filho, Universidade Federal do Rio de Janeiro          | Bianca Catarina Azevedo Cabral et al                                  |
| EPI_ISL_492037 | Instituto de Biologia do Exército                       | Laboratório de Metabolismo Macromolecular FirminoTorres de Castro, Instituto de Biofísica Carlos Chagas Filho, Universidade Federal do Rio de Janeiro          | Bianca Catarina Azevedo Cabral et al                                  |
| EPI_ISL_492034 | Instituto de Biologia do Exército                       | Laboratório de Metabolismo Macromolecular FirminoTorres de Castro, Instituto de Biofísica Carlos Chagas Filho, Universidade Federal do Rio de Janeiro          | Bianca Catarina Azevedo Cabral et al                                  |
| EPI_ISL_492035 | Instituto de Biologia do Exército                       | Laboratório de Metabolismo Macromolecular FirminoTorres de Castro, Instituto de Biofísica Carlos Chagas Filho, Universidade Federal do Rio de Janeiro          | Bianca Catarina Azevedo Cabral et al                                  |
| EPI_ISL_492040 | Instituto de Biologia do Exército                       | Laboratório de Metabolismo Macromolecular FirminoTorres de Castro, Instituto de Biofísica Carlos Chagas Filho, Universidade Federal do Rio de Janeiro          | Bianca Catarina Azevedo Cabral et al                                  |
| EPI_ISL_492041 | Instituto de Biologia do Exército                       | Laboratório de Metabolismo Macromolecular FirminoTorres de Castro, Instituto de Biofísica Carlos Chagas Filho, Universidade Federal do Rio de Janeiro          | Bianca Catarina Azevedo Cabral et al                                  |
| EPI_ISL_492042 | Instituto de Biologia do Exército                       | Laboratório de Metabolismo Macromolecular FirminoTorres de Castro, Instituto de Biofísica Carlos Chagas Filho, Universidade Federal do Rio de Janeiro          | Bianca Catarina Azevedo Cabral et al                                  |

|                |                                                                                                                     |                                                                                                                                                    |                                      |
|----------------|---------------------------------------------------------------------------------------------------------------------|----------------------------------------------------------------------------------------------------------------------------------------------------|--------------------------------------|
| EPI_ISL_492043 | Instituto de Biologia do Exército                                                                                   | Laboratório Metabolismo Macromolecular FirminoTorres de Castro, Instituto de Biofísica Carlos Chagas Filho, Universidade Federal do Rio de Janeiro | Bianca Catarina Azevedo Cabral et al |
| EPI_ISL_492044 | Instituto de Biologia do Exército                                                                                   | Laboratório Metabolismo Macromolecular FirminoTorres de Castro, Instituto de Biofísica Carlos Chagas Filho, Universidade Federal do Rio de Janeiro | Bianca Catarina Azevedo Cabral et al |
| EPI_ISL_492045 | Instituto de Biologia do Exército                                                                                   | Laboratório Metabolismo Macromolecular FirminoTorres de Castro, Instituto de Biofísica Carlos Chagas Filho, Universidade Federal do Rio de Janeiro | Bianca Catarina Azevedo Cabral et al |
| EPI_ISL_492046 | Instituto de Biologia do Exército                                                                                   | Laboratório Metabolismo Macromolecular FirminoTorres de Castro, Instituto de Biofísica Carlos Chagas Filho, Universidade Federal do Rio de Janeiro | Bianca Catarina Azevedo Cabral et al |
| EPI_ISL_492047 | Instituto de Biologia do Exército                                                                                   | Laboratório Metabolismo Macromolecular FirminoTorres de Castro, Instituto de Biofísica Carlos Chagas Filho, Universidade Federal do Rio de Janeiro | Bianca Catarina Azevedo Cabral et al |
| EPI_ISL_492048 | Instituto de Biologia do Exército                                                                                   | Laboratório Metabolismo Macromolecular FirminoTorres de Castro, Instituto de Biofísica Carlos Chagas Filho, Universidade Federal do Rio de Janeiro | Bianca Catarina Azevedo Cabral et al |
| EPI_ISL_492036 | Instituto de Biologia do Exército                                                                                   | Laboratório Metabolismo Macromolecular FirminoTorres de Castro, Instituto de Biofísica Carlos Chagas Filho, Universidade Federal do Rio de Janeiro | Bianca Catarina Azevedo Cabral et al |
| EPI_ISL_524798 | Evandro Chagas Institute                                                                                            | Evandro Chagas Institute                                                                                                                           | Santos et al                         |
| EPI_ISL_476326 | DB Diagnósticos do Brasil                                                                                           | Instituto de Medicina Tropical da Univesidade de São Paulo                                                                                         | Samples: Nelson Gaburo Jr et al      |
| EPI_ISL_514131 | Rondônia Central Public Health Laboratory (LACEN/RO), vinculated to State Health Secretariat of Rondônia (SESAU/RO) | Molecular Virology Laboratory of Oswaldo Cruz Foundation of Rondônia                                                                               | Luan Felipe Botelho-Souza et al      |
| EPI_ISL_514132 | Rondônia Central Public Health Laboratory (LACEN/RO), vinculated to State Health Secretariat of Rondônia (SESAU/RO) | Molecular Virology Laboratory of Oswaldo Cruz Foundation of Rondônia                                                                               | Luan Felipe Botelho-Souza et al      |
| EPI_ISL_514133 | Rondônia Central Public Health Laboratory (LACEN/RO), vinculated to State Health Secretariat of Rondônia (SESAU/RO) | Molecular Virology Laboratory of Oswaldo Cruz Foundation of Rondônia                                                                               | Luan Felipe Botelho-Souza et al      |
| EPI_ISL_514134 | Rondônia Central Public Health Laboratory (LACEN/RO), vinculated to State Health Secretariat of Rondônia (SESAU/RO) | Molecular Virology Laboratory of Oswaldo Cruz Foundation of Rondônia                                                                               | Luan Felipe Botelho-Souza et al      |
| EPI_ISL_514135 | Rondônia Central Public Health Laboratory (LACEN/RO), vinculated to State Health Secretariat of Rondônia (SESAU/RO) | Molecular Virology Laboratory of Oswaldo Cruz Foundation of Rondônia                                                                               | Luan Felipe Botelho-Souza et al      |
| EPI_ISL_514136 | Rondônia Central Public Health Laboratory (LACEN/RO), vinculated to State Health Secretariat of Rondônia (SESAU/RO) | Molecular Virology Laboratory of Oswaldo Cruz Foundation of Rondônia                                                                               | Luan Felipe Botelho-Souza et al      |
| EPI_ISL_514137 | Rondônia Central Public Health Laboratory (LACEN/RO), vinculated to State Health Secretariat of Rondônia (SESAU/RO) | Molecular Virology Laboratory of Oswaldo Cruz Foundation of Rondônia                                                                               | Luan Felipe Botelho-Souza et al      |
| EPI_ISL_514138 | Rondônia Central Public Health Laboratory (LACEN/RO), vinculated to State Health Secretariat of Rondônia (SESAU/RO) | Molecular Virology Laboratory of Oswaldo Cruz Foundation of Rondônia                                                                               | Luan Felipe Botelho-Souza et al      |
| EPI_ISL_985303 | LACEN do Estado de Goiás                                                                                            | Instituto Adolfo Lutz, Interdisciplinary Procedures Center, Strategic Laboratory                                                                   | Claudio Tavares Sacchi et al         |
| EPI_ISL_985304 | LACEN do Estado de Goiás                                                                                            | Instituto Adolfo Lutz, Interdisciplinary Procedures Center, Strategic Laboratory                                                                   | Claudio Tavares Sacchi et al         |
| EPI_ISL_985305 | LACEN do Estado de Goiás                                                                                            | Instituto Adolfo Lutz, Interdisciplinary Procedures Center, Strategic Laboratory                                                                   | Claudio Tavares Sacchi et al         |
| EPI_ISL_985306 | LACEN do Estado de Goiás                                                                                            | Instituto Adolfo Lutz, Interdisciplinary Procedures Center, Strategic Laboratory                                                                   | Claudio Tavares Sacchi et al         |
| EPI_ISL_985307 | LACEN do Estado de Goiás                                                                                            | Instituto Adolfo Lutz, Interdisciplinary Procedures Center, Strategic Laboratory                                                                   | Claudio Tavares Sacchi et al         |
| EPI_ISL_985308 | LACEN do Estado de Goiás                                                                                            | Instituto Adolfo Lutz, Interdisciplinary Procedures Center, Strategic Laboratory                                                                   | Claudio Tavares Sacchi et al         |
| EPI_ISL_985309 | LACEN do Estado de Goiás                                                                                            | Instituto Adolfo Lutz, Interdisciplinary Procedures Center, Strategic Laboratory                                                                   | Claudio Tavares Sacchi et al         |
| EPI_ISL_985310 | LACEN do Estado de Goiás                                                                                            | Instituto Adolfo Lutz, Interdisciplinary Procedures Center, Strategic Laboratory                                                                   | Claudio Tavares Sacchi et al         |
| EPI_ISL_985311 | LACEN do Estado de Goiás                                                                                            | Instituto Adolfo Lutz, Interdisciplinary Procedures Center, Strategic Laboratory                                                                   | Claudio Tavares Sacchi et al         |

|                |                                                               |                                                                                  |                              |
|----------------|---------------------------------------------------------------|----------------------------------------------------------------------------------|------------------------------|
| EPI_ISL_985312 | LACEN do Estado de Goias                                      | Instituto Adolfo Lutz, Interdisciplinary Procedures Center, Strategic Laboratory | Claudio Tavares Sacchi et al |
| EPI_ISL_985313 | LACEN do Estado de Goias                                      | Instituto Adolfo Lutz, Interdisciplinary Procedures Center, Strategic Laboratory | Claudio Tavares Sacchi et al |
| EPI_ISL_985314 | LACEN do Estado de Goias                                      | Instituto Adolfo Lutz, Interdisciplinary Procedures Center, Strategic Laboratory | Claudio Tavares Sacchi et al |
| EPI_ISL_985315 | LACEN do Estado de Goias                                      | Instituto Adolfo Lutz, Interdisciplinary Procedures Center, Strategic Laboratory | Claudio Tavares Sacchi et al |
| EPI_ISL_985316 | LACEN do Estado de Goias                                      | Instituto Adolfo Lutz, Interdisciplinary Procedures Center, Strategic Laboratory | Claudio Tavares Sacchi et al |
| EPI_ISL_985317 | LACEN do Estado de Goias                                      | Instituto Adolfo Lutz, Interdisciplinary Procedures Center, Strategic Laboratory | Claudio Tavares Sacchi et al |
| EPI_ISL_940630 | Hospital Geral de Sao Paulo                                   | Instituto Adolfo Lutz, Interdisciplinary Procedures Center, Strategic Laboratory | Claudio Tavares Sacchi et al |
| EPI_ISL_943967 | Hospital Geral de Sao Paulo                                   | Instituto Adolfo Lutz, Interdisciplinary Procedures Center, Strategic Laboratory | Claudio Tavares Sacchi et al |
| EPI_ISL_943968 | Hospital Geral de Sao Paulo                                   | Instituto Adolfo Lutz, Interdisciplinary Procedures Center, Strategic Laboratory | Claudio Tavares Sacchi et al |
| EPI_ISL_943969 | Hospital Geral de Sao Paulo                                   | Instituto Adolfo Lutz, Interdisciplinary Procedures Center, Strategic Laboratory | Claudio Tavares Sacchi et al |
| EPI_ISL_943970 | Hospital Geral de Sao Paulo                                   | Instituto Adolfo Lutz, Interdisciplinary Procedures Center, Strategic Laboratory | Claudio Tavares Sacchi et al |
| EPI_ISL_943971 | Hospital Geral de Sao Paulo                                   | Instituto Adolfo Lutz, Interdisciplinary Procedures Center, Strategic Laboratory | Claudio Tavares Sacchi et al |
| EPI_ISL_918513 | LACEN - Laboratório Central de Saúde Pública do Roraima       | Evandro Chagas Institute                                                         | Santos et al                 |
| EPI_ISL_848616 | Evandro Chagas Institute                                      | Evandro Chagas Institute                                                         | Santos et al                 |
| EPI_ISL_848586 | Evandro Chagas Institute                                      | Evandro Chagas Institute                                                         | Santos et al                 |
| EPI_ISL_848556 | Evandro Chagas Institute                                      | Evandro Chagas Institute                                                         | Santos et al                 |
| EPI_ISL_848610 | Evandro Chagas Institute                                      | Evandro Chagas Institute                                                         | Santos et al                 |
| EPI_ISL_779155 | Laboratório de Microbiologia Molecular - Universidade FEEVALE | Bioinformatics Laboratory / LNCC                                                 | Felipe Benites et al         |
| EPI_ISL_779156 | Laboratório de Microbiologia Molecular - Universidade FEEVALE | Bioinformatics Laboratory / LNCC                                                 | Felipe Benites et al         |
| EPI_ISL_770555 | Laboratório de Microbiologia Molecular - Universidade FEEVALE | Bioinformatics Laboratory / LNCC                                                 | Felipe Benites et al         |
| EPI_ISL_770556 | Laboratório de Microbiologia Molecular - Universidade FEEVALE | Bioinformatics Laboratory / LNCC                                                 | Felipe Benites et al         |
| EPI_ISL_770557 | Laboratório de Microbiologia Molecular - Universidade FEEVALE | Bioinformatics Laboratory / LNCC                                                 | Felipe Benites et al         |
| EPI_ISL_770558 | Laboratório de Microbiologia Molecular - Universidade FEEVALE | Bioinformatics Laboratory / LNCC                                                 | Felipe Benites et al         |
| EPI_ISL_770559 | Laboratório de Microbiologia Molecular - Universidade FEEVALE | Bioinformatics Laboratory / LNCC                                                 | Felipe Benites et al         |
| EPI_ISL_770560 | Laboratório de Microbiologia Molecular - Universidade FEEVALE | Bioinformatics Laboratory / LNCC                                                 | Felipe Benites et al         |
| EPI_ISL_770561 | Laboratório de Microbiologia Molecular - Universidade FEEVALE | Bioinformatics Laboratory / LNCC                                                 | Felipe Benites et al         |
| EPI_ISL_770562 | Laboratório de Microbiologia Molecular - Universidade FEEVALE | Bioinformatics Laboratory / LNCC                                                 | Felipe Benites et al         |
| EPI_ISL_770563 | Laboratório de Microbiologia Molecular - Universidade FEEVALE | Bioinformatics Laboratory / LNCC                                                 | Felipe Benites et al         |
| EPI_ISL_770564 | Laboratório de Microbiologia Molecular - Universidade FEEVALE | Bioinformatics Laboratory / LNCC                                                 | Felipe Benites et al         |
| EPI_ISL_770565 | Laboratório de Microbiologia Molecular - Universidade FEEVALE | Bioinformatics Laboratory / LNCC                                                 | Felipe Benites et al         |
| EPI_ISL_770566 | Laboratório de Microbiologia Molecular - Universidade FEEVALE | Bioinformatics Laboratory / LNCC                                                 | Felipe Benites et al         |
| EPI_ISL_770567 | Laboratório de Microbiologia Molecular - Universidade FEEVALE | Bioinformatics Laboratory / LNCC                                                 | Felipe Benites et al         |
| EPI_ISL_770568 | Laboratório de Microbiologia Molecular - Universidade FEEVALE | Bioinformatics Laboratory / LNCC                                                 | Felipe Benites et al         |







|                |                                                                                |                                                                                                               |                                   |
|----------------|--------------------------------------------------------------------------------|---------------------------------------------------------------------------------------------------------------|-----------------------------------|
| EPI_ISL_470651 | Hermes Pardini                                                                 | Bioinformatics Laboratory / LNCC                                                                              | Alexandra Gerber et al            |
| EPI_ISL_831645 | Laboratório de Microbiologia Molecular - Universidade FEEVALE                  | Universidade Federal de Ciências da Saúde de Porto Alegre                                                     | Vinícius Bonetti Franceschi et al |
| EPI_ISL_831646 | Laboratório de Microbiologia Molecular - Universidade FEEVALE                  | Universidade Federal de Ciências da Saúde de Porto Alegre                                                     | Vinícius Bonetti Franceschi et al |
| EPI_ISL_831660 | Laboratório de Microbiologia Molecular - Universidade FEEVALE                  | Universidade Federal de Ciências da Saúde de Porto Alegre                                                     | Vinícius Bonetti Franceschi et al |
| EPI_ISL_943595 | Central Laboratory of Public Health of Rio Grande do Sul (Lacen-RS)            | State Center for Health Surveillance of the Health Department of the State of Rio Grande do Sul (CEVS/SES-RS) | Aline Campos et al                |
| EPI_ISL_943596 | Central Laboratory of Public Health of Rio Grande do Sul (Lacen-RS)            | State Center for Health Surveillance of the Health Department of the State of Rio Grande do Sul (CEVS/SES-RS) | Aline Campos et al                |
| EPI_ISL_943589 | Central Laboratory of Public Health of Rio Grande do Sul (Lacen-RS)            | State Center for Health Surveillance of the Health Department of the State of Rio Grande do Sul (CEVS/SES-RS) | Aline Campos et al                |
| EPI_ISL_943597 | Central Laboratory of Public Health of Rio Grande do Sul (Lacen-RS)            | State Center for Health Surveillance of the Health Department of the State of Rio Grande do Sul (CEVS/SES-RS) | Aline Campos et al                |
| EPI_ISL_943598 | Central Laboratory of Public Health of Rio Grande do Sul (Lacen-RS)            | State Center for Health Surveillance of the Health Department of the State of Rio Grande do Sul (CEVS/SES-RS) | Aline Campos et al                |
| EPI_ISL_831681 | Laboratório de Microbiologia Molecular - Universidade FEEVALE                  | Universidade Federal de Ciências da Saúde de Porto Alegre                                                     | Vinícius Bonetti Franceschi et al |
| EPI_ISL_831683 | Laboratório de Microbiologia Molecular - Universidade FEEVALE                  | Universidade Federal de Ciências da Saúde de Porto Alegre                                                     | Vinícius Bonetti Franceschi et al |
| EPI_ISL_831685 | Laboratório de Microbiologia Molecular - Universidade FEEVALE                  | Universidade Federal de Ciências da Saúde de Porto Alegre                                                     | Vinícius Bonetti Franceschi et al |
| EPI_ISL_943590 | Central Laboratory of Public Health of Rio Grande do Sul (Lacen-RS)            | State Center for Health Surveillance of the Health Department of the State of Rio Grande do Sul (CEVS/SES-RS) | Aline Campos et al                |
| EPI_ISL_729801 | Laboratorio Central de Saude Publica do Estado do Rio Grande do Sul (LACEN-RS) | Laboratory of Respiratory Viruses and Measles, Oswaldo Cruz Institute, FIOCRUZ                                | Paola Resende et al               |
| EPI_ISL_729844 | Laboratorio Central de Saude Publica do Estado do Rio Grande do Sul (LACEN-RS) | Laboratory of Respiratory Viruses and Measles, Oswaldo Cruz Institute, FIOCRUZ                                | Paola Resende et al               |
| EPI_ISL_729850 | Laboratorio Central de Saude Publica do Estado do Rio Grande do Sul (LACEN-RS) | Laboratory of Respiratory Viruses and Measles, Oswaldo Cruz Institute, FIOCRUZ                                | Paola Resende et al               |
| EPI_ISL_729856 | Laboratorio Central de Saude Publica do Estado do Rio Grande do Sul (LACEN-RS) | Laboratory of Respiratory Viruses and Measles, Oswaldo Cruz Institute, FIOCRUZ                                | Paola Resende et al               |
| EPI_ISL_729857 | Laboratorio Central de Saude Publica do Estado do Rio Grande do Sul (LACEN-RS) | Laboratory of Respiratory Viruses and Measles, Oswaldo Cruz Institute, FIOCRUZ                                | Paola Resende et al               |
| EPI_ISL_729848 | Laboratorio Central de Saude Publica do Estado do Rio Grande do Sul (LACEN-RS) | Laboratory of Respiratory Viruses and Measles, Oswaldo Cruz Institute, FIOCRUZ                                | Paola Resende et al               |
| EPI_ISL_729845 | Laboratorio Central de Saude Publica do Estado do Rio Grande do Sul (LACEN-RS) | Laboratory of Respiratory Viruses and Measles, Oswaldo Cruz Institute, FIOCRUZ                                | Paola Resende et al               |
| EPI_ISL_729851 | Laboratorio Central de Saude Publica do Estado do Rio Grande do Sul (LACEN-RS) | Laboratory of Respiratory Viruses and Measles, Oswaldo Cruz Institute, FIOCRUZ                                | Paola Resende et al               |
| EPI_ISL_729852 | Laboratorio Central de Saude Publica do Estado do Rio Grande do Sul (LACEN-RS) | Laboratory of Respiratory Viruses and Measles, Oswaldo Cruz Institute, FIOCRUZ                                | Paola Resende et al               |
| EPI_ISL_729858 | Laboratorio Central de Saude Publica do Estado do Rio Grande do Sul (LACEN-RS) | Laboratory of Respiratory Viruses and Measles, Oswaldo Cruz Institute, FIOCRUZ                                | Paola Resende et al               |
| EPI_ISL_729802 | Laboratorio Central de Saude Publica do Estado do Rio Grande do Sul (LACEN-RS) | Laboratory of Respiratory Viruses and Measles, Oswaldo Cruz Institute, FIOCRUZ                                | Paola Resende et al               |
| EPI_ISL_729853 | Laboratorio Central de Saude Publica do Estado do Rio Grande do Sul (LACEN-RS) | Laboratory of Respiratory Viruses and Measles, Oswaldo Cruz Institute, FIOCRUZ                                | Paola Resende et al               |
| EPI_ISL_729859 | Laboratorio Central de Saude Publica do Estado do Rio Grande do Sul (LACEN-RS) | Laboratory of Respiratory Viruses and Measles, Oswaldo Cruz Institute, FIOCRUZ                                | Paola Resende et al               |
| EPI_ISL_729803 | Laboratorio Central de Saude Publica do Estado do Rio Grande do Sul (LACEN-RS) | Laboratory of Respiratory Viruses and Measles, Oswaldo Cruz Institute, FIOCRUZ                                | Paola Resende et al               |
| EPI_ISL_729860 | Laboratorio Central de Saude Publica do Estado do Rio Grande do Sul (LACEN-RS) | Laboratory of Respiratory Viruses and Measles, Oswaldo Cruz Institute, FIOCRUZ                                | Paola Resende et al               |









|                |                                                                     |                                                                                                               |                                                                   |
|----------------|---------------------------------------------------------------------|---------------------------------------------------------------------------------------------------------------|-------------------------------------------------------------------|
| EPI_ISL_943610 | Central Laboratory of Public Health of Rio Grande do Sul (Lacen-RS) | State Center for Health Surveillance of the Health Department of the State of Rio Grande do Sul (CEVS/SES-RS) | Aline Campos et al                                                |
| EPI_ISL_943612 | Central Laboratory of Public Health of Rio Grande do Sul (Lacen-RS) | State Center for Health Surveillance of the Health Department of the State of Rio Grande do Sul (CEVS/SES-RS) | Aline Campos et al                                                |
| EPI_ISL_943613 | Central Laboratory of Public Health of Rio Grande do Sul (Lacen-RS) | State Center for Health Surveillance of the Health Department of the State of Rio Grande do Sul (CEVS/SES-RS) | Aline Campos et al                                                |
| EPI_ISL_943604 | Central Laboratory of Public Health of Rio Grande do Sul (Lacen-RS) | State Center for Health Surveillance of the Health Department of the State of Rio Grande do Sul (CEVS/SES-RS) | Aline Campos et al                                                |
| EPI_ISL_983863 | Central Laboratory of Public Health of Rio Grande do Sul (Lacen-RS) | State Center for Health Surveillance of the Health Department of the State of Rio Grande do Sul (CEVS/SES-RS) | Aline Campos et al                                                |
| EPI_ISL_983864 | Central Laboratory of Public Health of Rio Grande do Sul (Lacen-RS) | State Center for Health Surveillance of the Health Department of the State of Rio Grande do Sul (CEVS/SES-RS) | Aline Campos et al                                                |
| EPI_ISL_983867 | Central Laboratory of Public Health of Rio Grande do Sul (Lacen-RS) | State Center for Health Surveillance of the Health Department of the State of Rio Grande do Sul (CEVS/SES-RS) | Aline Campos et al                                                |
| EPI_ISL_983869 | Central Laboratory of Public Health of Rio Grande do Sul (Lacen-RS) | State Center for Health Surveillance of the Health Department of the State of Rio Grande do Sul (CEVS/SES-RS) | Aline Campos et al                                                |
| EPI_ISL_983865 | Central Laboratory of Public Health of Rio Grande do Sul (Lacen-RS) | State Center for Health Surveillance of the Health Department of the State of Rio Grande do Sul (CEVS/SES-RS) | Aline Campos et al                                                |
| EPI_ISL_983868 | Central Laboratory of Public Health of Rio Grande do Sul (Lacen-RS) | State Center for Health Surveillance of the Health Department of the State of Rio Grande do Sul (CEVS/SES-RS) | Aline Campos et al                                                |
| EPI_ISL_983866 | Central Laboratory of Public Health of Rio Grande do Sul (Lacen-RS) | State Center for Health Surveillance of the Health Department of the State of Rio Grande do Sul (CEVS/SES-RS) | Aline Campos et al                                                |
| EPI_ISL_984620 | Central Laboratory of Public Health of Rio Grande do Sul (Lacen-RS) | State Center for Health Surveillance of the Health Department of the State of Rio Grande do Sul (CEVS/SES-RS) | Aline Campos et al                                                |
| EPI_ISL_984621 | Central Laboratory of Public Health of Rio Grande do Sul (Lacen-RS) | State Center for Health Surveillance of the Health Department of the State of Rio Grande do Sul (CEVS/SES-RS) | Aline Campos et al                                                |
| EPI_ISL_984619 | Central Laboratory of Public Health of Rio Grande do Sul (Lacen-RS) | State Center for Health Surveillance of the Health Department of the State of Rio Grande do Sul (CEVS/SES-RS) | Aline Campos et al                                                |
| EPI_ISL_831678 | Laboratório de Microbiologia Molecular - Universidade FEEVALE       | Universidade Federal de Ciências da Saúde de Porto Alegre                                                     | Vinícius Bonetti Franceschi et al                                 |
| EPI_ISL_476188 | DB Diagnósticos do Brasil                                           | Instituto de Medicina Tropical da Univesidade de São Paulo                                                    | Samples: Nelson Gaburo Jr et al                                   |
| EPI_ISL_476192 | DB Diagnósticos do Brasil                                           | Instituto de Medicina Tropical da Univesidade de São Paulo                                                    | Samples: Nelson Gaburo Jr et al                                   |
| EPI_ISL_476316 | DB Diagnósticos do Brasil                                           | Instituto de Medicina Tropical da Univesidade de São Paulo                                                    | Samples: Nelson Gaburo Jr et al                                   |
| EPI_ISL_476319 | DB Diagnósticos do Brasil                                           | Instituto de Medicina Tropical da Univesidade de São Paulo                                                    | Samples: Nelson Gaburo Jr et al                                   |
| EPI_ISL_476335 | DB Diagnósticos do Brasil                                           | Instituto de Medicina Tropical da Univesidade de São Paulo                                                    | Samples: Nelson Gaburo Jr et al                                   |
| EPI_ISL_672684 | DB Diagnosticos do Brasil                                           | Laboratório de Parasitologia Médica - Instituto de Medicina Tropical - Universidade de São Paulo              | Discovery Diagnosis Genomics et al                                |
| EPI_ISL_722144 | DB Diagnosticos do Brasil                                           | Laboratório de Parasitologia Médica - Instituto de Medicina Tropical - Universidade de São Paulo              | Brazil-UK Centre for Arbovirus Discovery Diagnosis Genomics et al |
| EPI_ISL_943601 | Central Laboratory of Public Health of Rio Grande do Sul (Lacen-RS) | State Center for Health Surveillance of the Health Department of the State of Rio Grande do Sul (CEVS/SES-RS) | Aline Campos et al                                                |
| EPI_ISL_470652 | Hermes Pardini                                                      | Bioinformatics Laboratory / LNCC                                                                              | Alexandra Gerber et al                                            |
| EPI_ISL_470653 | Hermes Pardini                                                      | Bioinformatics Laboratory / LNCC                                                                              | Alexandra Gerber et al                                            |
| EPI_ISL_470654 | Hermes Pardini                                                      | Bioinformatics Laboratory / LNCC                                                                              | Alexandra Gerber et al                                            |
| EPI_ISL_470655 | Hermes Pardini                                                      | Bioinformatics Laboratory / LNCC                                                                              | Alexandra Gerber et al                                            |
| EPI_ISL_985318 | LACEN de Santa Catarina                                             | Instituto Adolfo Lutz, Interdisciplinary Procedures Center, Strategic Laboratory                              | Claudio Tavares Sacchi et al                                      |
| EPI_ISL_985319 | LACEN de Santa Catarina                                             | Instituto Adolfo Lutz, Interdisciplinary Procedures Center, Strategic Laboratory                              | Claudio Tavares Sacchi et al                                      |



|                |                                                                            |                                                                                       |                                    |
|----------------|----------------------------------------------------------------------------|---------------------------------------------------------------------------------------|------------------------------------|
| EPI_ISL_427305 | LACEN-SC - Laboratorio Central de Santa Catarina                           | Instituto Oswaldo Cruz FIOCRUZ - Laboratory of Respiratory Viruses and Measles (LVRS) | Paola Resende et al                |
| EPI_ISL_427306 | LACEN-SC - Laboratorio Central de Santa Catarina                           | Instituto Oswaldo Cruz FIOCRUZ - Laboratory of Respiratory Viruses and Measles (LVRS) | Paola Resende et al                |
| EPI_ISL_541370 | LACEN/SC                                                                   | Laboratory of Respiratory Viruses and Measles, Oswaldo Cruz Institute, FIOCRUZ        | Paola Resende et al                |
| EPI_ISL_541371 | LACEN/SC                                                                   | Laboratory of Respiratory Viruses and Measles, Oswaldo Cruz Institute, FIOCRUZ        | Paola Resende et al                |
| EPI_ISL_476259 | Hospital da Clínicas da Faculdade de Medicina da Universidade de São Paulo | Instituto de Medicina Tropical da Univesidade de São Paulo                            | Samples: Ingra Morales Claro et al |
| EPI_ISL_476278 | DB Diagnósticos do Brasil                                                  | Instituto de Medicina Tropical da Univesidade de São Paulo                            | Samples: Nelson Gaburo Jr et al    |
| EPI_ISL_476292 | DB Diagnósticos do Brasil                                                  | Instituto de Medicina Tropical da Univesidade de São Paulo                            | Samples: Nelson Gaburo Jr et al    |
| EPI_ISL_476297 | DB Diagnósticos do Brasil                                                  | Instituto de Medicina Tropical da Univesidade de São Paulo                            | Samples: Nelson Gaburo Jr et al    |
| EPI_ISL_476317 | DB Diagnósticos do Brasil                                                  | Instituto de Medicina Tropical da Univesidade de São Paulo                            | Samples: Nelson Gaburo Jr et al    |
| EPI_ISL_476324 | DB Diagnósticos do Brasil                                                  | Instituto de Medicina Tropical da Univesidade de São Paulo                            | Samples: Nelson Gaburo Jr et al    |
| EPI_ISL_541372 | LACEN/SE                                                                   | Laboratory of Respiratory Viruses and Measles, Oswaldo Cruz Institute, FIOCRUZ        | Paola Resende et al                |
| EPI_ISL_541373 | LACEN/SE                                                                   | Laboratory of Respiratory Viruses and Measles, Oswaldo Cruz Institute, FIOCRUZ        | Paola Resende et al                |
| EPI_ISL_541374 | LACEN/SE                                                                   | Laboratory of Respiratory Viruses and Measles, Oswaldo Cruz Institute, FIOCRUZ        | Paola Resende et al                |
| EPI_ISL_541375 | LACEN/SE                                                                   | Laboratory of Respiratory Viruses and Measles, Oswaldo Cruz Institute, FIOCRUZ        | Paola Resende et al                |
| EPI_ISL_541376 | LACEN/SE                                                                   | Laboratory of Respiratory Viruses and Measles, Oswaldo Cruz Institute, FIOCRUZ        | Paola Resende et al                |
| EPI_ISL_541377 | LACEN/SE                                                                   | Laboratory of Respiratory Viruses and Measles, Oswaldo Cruz Institute, FIOCRUZ        | Paola Resende et al                |
| EPI_ISL_541378 | LACEN/SE                                                                   | Laboratory of Respiratory Viruses and Measles, Oswaldo Cruz Institute, FIOCRUZ        | Paola Resende et al                |
| EPI_ISL_541379 | LACEN/SE                                                                   | Laboratory of Respiratory Viruses and Measles, Oswaldo Cruz Institute, FIOCRUZ        | Paola Resende et al                |
| EPI_ISL_541380 | LACEN/SE                                                                   | Laboratory of Respiratory Viruses and Measles, Oswaldo Cruz Institute, FIOCRUZ        | Paola Resende et al                |
| EPI_ISL_541381 | LACEN/SE                                                                   | Laboratory of Respiratory Viruses and Measles, Oswaldo Cruz Institute, FIOCRUZ        | Paola Resende et al                |
| EPI_ISL_541382 | LACEN/SE                                                                   | Laboratory of Respiratory Viruses and Measles, Oswaldo Cruz Institute, FIOCRUZ        | Paola Resende et al                |
| EPI_ISL_541383 | LACEN/SE                                                                   | Laboratory of Respiratory Viruses and Measles, Oswaldo Cruz Institute, FIOCRUZ        | Paola Resende et al                |
| EPI_ISL_541384 | LACEN/SE                                                                   | Laboratory of Respiratory Viruses and Measles, Oswaldo Cruz Institute, FIOCRUZ        | Paola Resende et al                |
| EPI_ISL_541385 | LACEN/SE                                                                   | Laboratory of Respiratory Viruses and Measles, Oswaldo Cruz Institute, FIOCRUZ        | Paola Resende et al                |
| EPI_ISL_541386 | LACEN/SE                                                                   | Laboratory of Respiratory Viruses and Measles, Oswaldo Cruz Institute, FIOCRUZ        | Paola Resende et al                |
| EPI_ISL_541387 | LACEN/SE                                                                   | Laboratory of Respiratory Viruses and Measles, Oswaldo Cruz Institute, FIOCRUZ        | Paola Resende et al                |
| EPI_ISL_541388 | LACEN/SE                                                                   | Laboratory of Respiratory Viruses and Measles, Oswaldo Cruz Institute, FIOCRUZ        | Paola Resende et al                |

|                |                                                   |                                                                                  |                               |
|----------------|---------------------------------------------------|----------------------------------------------------------------------------------|-------------------------------|
| EPI_ISL_541389 | LACEN/SE                                          | Laboratory of Respiratory Viruses and Measles, Oswaldo Cruz Institute, FIOCRUZ   | Paola Resende et al           |
| EPI_ISL_541390 | LACEN/SE                                          | Laboratory of Respiratory Viruses and Measles, Oswaldo Cruz Institute, FIOCRUZ   | Paola Resende et al           |
| EPI_ISL_541391 | LACEN/SE                                          | Laboratory of Respiratory Viruses and Measles, Oswaldo Cruz Institute, FIOCRUZ   | Paola Resende et al           |
| EPI_ISL_541392 | LACEN/SE                                          | Laboratory of Respiratory Viruses and Measles, Oswaldo Cruz Institute, FIOCRUZ   | Paola Resende et al           |
| EPI_ISL_541393 | LACEN/SE                                          | Laboratory of Respiratory Viruses and Measles, Oswaldo Cruz Institute, FIOCRUZ   | Paola Resende et al           |
| EPI_ISL_541394 | LACEN/SE                                          | Laboratory of Respiratory Viruses and Measles, Oswaldo Cruz Institute, FIOCRUZ   | Paola Resende et al           |
| EPI_ISL_541395 | LACEN/SE                                          | Laboratory of Respiratory Viruses and Measles, Oswaldo Cruz Institute, FIOCRUZ   | Paola Resende et al           |
| EPI_ISL_541396 | LACEN/SE                                          | Laboratory of Respiratory Viruses and Measles, Oswaldo Cruz Institute, FIOCRUZ   | Paola Resende et al           |
| EPI_ISL_412964 | Hospital Israelita Albert Einstein                | Instituto Adolfo Lutz Interdisciplinary Procedures Center Strategic Laboratory   | Jaqueline Goes de Jesus et al |
| EPI_ISL_413016 | Hospital Israelita Albert Einstein                | Instituto Adolfo Lutz, Interdisciplinary Procedures Center, Strategic Laboratory | Jaqueline Goes de Jesus et al |
| EPI_ISL_414014 | Hospital Israelita Albert Einstein                | Instituto Adolfo Lutz, Interdisciplinary Procedures Center, Strategic Laboratory | Claudio Tavares Sacchi et al  |
| EPI_ISL_414017 | Hospital São Joaquim Beneficencia Portuguesa      | Instituto Adolfo Lutz, Interdisciplinary Procedures Center, Strategic Laboratory | Claudio Tavares Sacchi et al  |
| EPI_ISL_414016 | Hospital São Joaquim Beneficencia Portuguesa      | Instituto Adolfo Lutz, Interdisciplinary Procedures Center, Strategic Laboratory | Claudio Tavares Sacchi et al  |
| EPI_ISL_414015 | Hospital São Joaquim Beneficencia Portuguesa      | Instituto Adolfo Lutz, Interdisciplinary Procedures Center, Strategic Laboratory | Claudio Tavares Sacchi et al  |
| EPI_ISL_416028 | National Influenza Center - Instituto Adolfo Lutz | Instituto Adolfo Lutz, Interdisciplinary Procedures Center, Strategic Laboratory | Claudio Tavares Sacchi et al  |
| EPI_ISL_416029 | Laboratório Fleury                                | Instituto Adolfo Lutz, Interdisciplinary Procedures Center, Strategic Laboratory | Claudio Tavares Sacchi et al  |
| EPI_ISL_416031 | National Influenza Center - Instituto Adolfo Lutz | Instituto Adolfo Lutz, Interdisciplinary Procedures Center, Strategic Laboratory | Claudio Tavares Sacchi et al  |
| EPI_ISL_416032 | National Influenza Center - Instituto Adolfo Lutz | Instituto Adolfo Lutz, Interdisciplinary Procedures Center, Strategic Laboratory | Claudio Tavares Sacchi et al  |
| EPI_ISL_861680 | Hospital e Pronto Socorro Portinari               | Instituto Adolfo Lutz, Interdisciplinary Procedures Center, Strategic Laboratory | Claudio Tavares Sacchi et al  |
| EPI_ISL_861681 | Hospital Municipal Dr. Waldemar Tebaldi           | Instituto Adolfo Lutz, Interdisciplinary Procedures Center, Strategic Laboratory | Claudio Tavares Sacchi et al  |
| EPI_ISL_861682 | UPA Vila Santa Catarina                           | Instituto Adolfo Lutz, Interdisciplinary Procedures Center, Strategic Laboratory | Claudio Tavares Sacchi et al  |
| EPI_ISL_861683 | Complexo Hospitalar Padre Bento de Guarulhos      | Instituto Adolfo Lutz, Interdisciplinary Procedures Center, Strategic Laboratory | Claudio Tavares Sacchi et al  |
| EPI_ISL_861684 | Hospital Pronto Socorro Itaquera                  | Instituto Adolfo Lutz, Interdisciplinary Procedures Center, Strategic Laboratory | Claudio Tavares Sacchi et al  |
| EPI_ISL_861685 | Hospital Pronto Socorro Itaquera                  | Instituto Adolfo Lutz, Interdisciplinary Procedures Center, Strategic Laboratory | Claudio Tavares Sacchi et al  |
| EPI_ISL_882669 | UPA Vila Santa Catarina                           | Instituto Adolfo Lutz, Interdisciplinary Procedures Center, Strategic Laboratory | Claudio Tavares Sacchi et al  |
| EPI_ISL_882666 | UMS de Juquitiba                                  | Instituto Adolfo Lutz, Interdisciplinary Procedures Center, Strategic Laboratory | Claudio Tavares Sacchi et al  |

|                |                                                         |                                                                                  |                              |
|----------------|---------------------------------------------------------|----------------------------------------------------------------------------------|------------------------------|
| EPI_ISL_882668 | UMS de Juquitiba                                        | Instituto Adolfo Lutz, Interdisciplinary Procedures Center, Strategic Laboratory | Claudio Tavares Sacchi et al |
| EPI_ISL_882665 | Unidade de Pronto Atendimento Dra Zilda Arns            | Instituto Adolfo Lutz, Interdisciplinary Procedures Center, Strategic Laboratory | Claudio Tavares Sacchi et al |
| EPI_ISL_882670 | Hospital Samaritano Paulista                            | Instituto Adolfo Lutz, Interdisciplinary Procedures Center, Strategic Laboratory | Claudio Tavares Sacchi et al |
| EPI_ISL_882667 | Hospital de Clinicas Caieiras                           | Instituto Adolfo Lutz, Interdisciplinary Procedures Center, Strategic Laboratory | Claudio Tavares Sacchi et al |
| EPI_ISL_875689 | Hospital do Servidor Publico                            | Instituto Adolfo Lutz, Interdisciplinary Procedures Center, Strategic Laboratory | Claudio Tavares Sacchi et al |
| EPI_ISL_882671 | Hospital Municipal Dr. Guido Guida                      | Instituto Adolfo Lutz, Interdisciplinary Procedures Center, Strategic Laboratory | Claudio Tavares Sacchi et al |
| EPI_ISL_882672 | Hospital Municipal Dr. Guido Guida                      | Instituto Adolfo Lutz, Interdisciplinary Procedures Center, Strategic Laboratory | Claudio Tavares Sacchi et al |
| EPI_ISL_882673 | Hospital Municipal Dr. Guido Guida                      | Instituto Adolfo Lutz, Interdisciplinary Procedures Center, Strategic Laboratory | Claudio Tavares Sacchi et al |
| EPI_ISL_872191 | Conjunto Hospitalar do Mandaqui de Sao Paulo            | Instituto Adolfo Lutz, Interdisciplinary Procedures Center, Strategic Laboratory | Claudio Tavares Sacchi et al |
| EPI_ISL_872192 | Conjunto Hospitalar do Mandaqui de Sao Paulo            | Instituto Adolfo Lutz, Interdisciplinary Procedures Center, Strategic Laboratory | Claudio Tavares Sacchi et al |
| EPI_ISL_906068 | Instituto Adolfo Lutz - Regional de Campinas            | Instituto Adolfo Lutz, Interdisciplinary Procedures Center, Strategic Laboratory | Claudio Tavares Sacchi et al |
| EPI_ISL_906072 | UPA Dr. Akira Tada                                      | Instituto Adolfo Lutz, Interdisciplinary Procedures Center, Strategic Laboratory | Claudio Tavares Sacchi et al |
| EPI_ISL_906074 | Searom Laboratorio Diagnostico                          | Instituto Adolfo Lutz, Interdisciplinary Procedures Center, Strategic Laboratory | Claudio Tavares Sacchi et al |
| EPI_ISL_940609 | Hospital e Maternidade Celso Pierro                     | Instituto Adolfo Lutz, Interdisciplinary Procedures Center, Strategic Laboratory | Claudio Tavares Sacchi et al |
| EPI_ISL_906073 | Hospital Vila Lobos                                     | Instituto Adolfo Lutz, Interdisciplinary Procedures Center, Strategic Laboratory | Claudio Tavares Sacchi et al |
| EPI_ISL_940610 | Hospital Paulistano Paulista                            | Instituto Adolfo Lutz, Interdisciplinary Procedures Center, Strategic Laboratory | Claudio Tavares Sacchi et al |
| EPI_ISL_906079 | Hospital Paulistano Paulista                            | Instituto Adolfo Lutz, Interdisciplinary Procedures Center, Strategic Laboratory | Claudio Tavares Sacchi et al |
| EPI_ISL_940611 | Hospital Paulistano Paulista                            | Instituto Adolfo Lutz, Interdisciplinary Procedures Center, Strategic Laboratory | Claudio Tavares Sacchi et al |
| EPI_ISL_906078 | Hospital Carlos Chagas                                  | Instituto Adolfo Lutz, Interdisciplinary Procedures Center, Strategic Laboratory | Claudio Tavares Sacchi et al |
| EPI_ISL_940619 | Hospital Sao Joaquim - Beneficiencia Portuguesa         | Instituto Adolfo Lutz, Interdisciplinary Procedures Center, Strategic Laboratory | Claudio Tavares Sacchi et al |
| EPI_ISL_940621 | Hospital Sao Joaquim - Beneficiencia Portuguesa         | Instituto Adolfo Lutz, Interdisciplinary Procedures Center, Strategic Laboratory | Claudio Tavares Sacchi et al |
| EPI_ISL_940622 | Hospital Sao Joaquim - Beneficiencia Portuguesa         | Instituto Adolfo Lutz, Interdisciplinary Procedures Center, Strategic Laboratory | Claudio Tavares Sacchi et al |
| EPI_ISL_940625 | Hospital Sao Joaquim - Beneficiencia Portuguesa         | Instituto Adolfo Lutz, Interdisciplinary Procedures Center, Strategic Laboratory | Claudio Tavares Sacchi et al |
| EPI_ISL_940628 | Unidade Mista de Iguape                                 | Instituto Adolfo Lutz, Interdisciplinary Procedures Center, Strategic Laboratory | Claudio Tavares Sacchi et al |
| EPI_ISL_940629 | Hospital Municipal Josanias Castanha Braga              | Instituto Adolfo Lutz, Interdisciplinary Procedures Center, Strategic Laboratory | Claudio Tavares Sacchi et al |
| EPI_ISL_977471 | Instituto Adolfo Lutz - Regional de Presidente Prudente | Instituto Adolfo Lutz, Interdisciplinary Procedures Center, Strategic Laboratory | Claudio Tavares Sacchi et al |



|                |                                                         |                                                                                  |                              |
|----------------|---------------------------------------------------------|----------------------------------------------------------------------------------|------------------------------|
| EPI_ISL_977485 | Instituto Adolfo Lutz - Regional de Presidente Prudente | Instituto Adolfo Lutz, Interdisciplinary Procedures Center, Strategic Laboratory | Claudio Tavares Sacchi et al |
| EPI_ISL_977486 | Instituto Adolfo Lutz - Regional de Santo Andre         | Instituto Adolfo Lutz, Interdisciplinary Procedures Center, Strategic Laboratory | Claudio Tavares Sacchi et al |
| EPI_ISL_977487 | Instituto Adolfo Lutz Central                           | Instituto Adolfo Lutz, Interdisciplinary Procedures Center, Strategic Laboratory | Claudio Tavares Sacchi et al |
| EPI_ISL_977488 | Instituto Adolfo Lutz - Regional de Presidente Prudente | Instituto Adolfo Lutz, Interdisciplinary Procedures Center, Strategic Laboratory | Claudio Tavares Sacchi et al |
| EPI_ISL_515520 | Hospital Municipal do Tatuape Carmino Caricchio         | Instituto Adolfo Lutz, Interdisciplinary Procedures Center, Strategic Laboratory | Claudio Tavares Sacchi et al |
| EPI_ISL_416034 | Hospital Israelita Albert Einstein                      | Instituto Adolfo Lutz, Interdisciplinary Procedures Center, Strategic Laboratory | Claudio Tavares Sacchi et al |
| EPI_ISL_515521 | Hospital Municipal Dr Waldemar Tebaldi                  | Instituto Adolfo Lutz, Interdisciplinary Procedures Center, Strategic Laboratory | Claudio Tavares Sacchi et al |
| EPI_ISL_977489 | UPA Dr. Akira Tada                                      | Instituto Adolfo Lutz, Interdisciplinary Procedures Center, Strategic Laboratory | Claudio Tavares Sacchi et al |
| EPI_ISL_977490 | Hospital Municipal Guido Guida                          | Instituto Adolfo Lutz, Interdisciplinary Procedures Center, Strategic Laboratory | Claudio Tavares Sacchi et al |
| EPI_ISL_515522 | UPA 24HS de Itatiba                                     | Instituto Adolfo Lutz, Interdisciplinary Procedures Center, Strategic Laboratory | Claudio Tavares Sacchi et al |
| EPI_ISL_515523 | PS Municipal Dr Lauro Ribas Braga                       | Instituto Adolfo Lutz, Interdisciplinary Procedures Center, Strategic Laboratory | Claudio Tavares Sacchi et al |
| EPI_ISL_515524 | PS Municipal Dr Lauro Ribas Braga                       | Instituto Adolfo Lutz, Interdisciplinary Procedures Center, Strategic Laboratory | Claudio Tavares Sacchi et al |
| EPI_ISL_471541 | Hospital Geral Santa Marcelina                          | Instituto Adolfo Lutz, Interdisciplinary Procedures Center, Strategic Laboratory | Claudio Tavares Sacchi et al |
| EPI_ISL_471542 | Secretaria de Saude de Mogi das Cruzes                  | Instituto Adolfo Lutz, Interdisciplinary Procedures Center, Strategic Laboratory | Claudio Tavares Sacchi et al |
| EPI_ISL_523955 | Hospital Municipal do Tatuape Carmino Caricchio         | Instituto Adolfo Lutz, Interdisciplinary Procedures Center, Strategic Laboratory | Claudio Tavares Sacchi et al |
| EPI_ISL_416035 | National Influenza Center - Instituto Adolfo Lutz       | Instituto Adolfo Lutz, Interdisciplinary Procedures Center, Strategic Laboratory | Claudio Tavares Sacchi et al |
| EPI_ISL_471543 | Centro de Saude I Tacito Leite de Carvalho e Silva      | Instituto Adolfo Lutz, Interdisciplinary Procedures Center, Strategic Laboratory | Claudio Tavares Sacchi et al |
| EPI_ISL_523956 | Hospital Regional de Assis                              | Instituto Adolfo Lutz, Interdisciplinary Procedures Center, Strategic Laboratory | Claudio Tavares Sacchi et al |
| EPI_ISL_523957 | Hospital Itamaraty                                      | Instituto Adolfo Lutz, Interdisciplinary Procedures Center, Strategic Laboratory | Claudio Tavares Sacchi et al |
| EPI_ISL_515542 | Vigilância Epidemiológica de Leme                       | Instituto Adolfo Lutz, Interdisciplinary Procedures Center, Strategic Laboratory | Claudio Tavares Sacchi et al |
| EPI_ISL_515543 | Serviço de Vigilância Sanitária e Epidemiológica        | Instituto Adolfo Lutz, Interdisciplinary Procedures Center, Strategic Laboratory | Claudio Tavares Sacchi et al |
| EPI_ISL_468305 | Centro de Vigilancia a Saude de Diadema                 | Instituto Adolfo Lutz, Interdisciplinary Procedures Center, Strategic Laboratory | Claudio Tavares Sacchi et al |
| EPI_ISL_981383 | IAL Regional de Bauru                                   | Instituto Adolfo Lutz, Interdisciplinary Procedures Center, Strategic Laboratory | Claudio Tavares Sacchi et al |
| EPI_ISL_981385 | IAL Regional de Bauru                                   | Instituto Adolfo Lutz, Interdisciplinary Procedures Center, Strategic Laboratory | Claudio Tavares Sacchi et al |
| EPI_ISL_981387 | IAL Regional de Bauru                                   | Instituto Adolfo Lutz, Interdisciplinary Procedures Center, Strategic Laboratory | Claudio Tavares Sacchi et al |
| EPI_ISL_984247 | IAL Regional de Marília                                 | Instituto Adolfo Lutz, Interdisciplinary Procedures Center, Strategic Laboratory | Claudio Tavares Sacchi et al |

|                |                                                    |                                                                                  |                              |
|----------------|----------------------------------------------------|----------------------------------------------------------------------------------|------------------------------|
| EPI_ISL_984248 | IAL Regional de Marilia                            | Instituto Adolfo Lutz, Interdisciplinary Procedures Center, Strategic Laboratory | Claudio Tavares Sacchi et al |
| EPI_ISL_984249 | IAL Regional de Marilia                            | Instituto Adolfo Lutz, Interdisciplinary Procedures Center, Strategic Laboratory | Claudio Tavares Sacchi et al |
| EPI_ISL_984250 | IAL Regional de Marilia                            | Instituto Adolfo Lutz, Interdisciplinary Procedures Center, Strategic Laboratory | Claudio Tavares Sacchi et al |
| EPI_ISL_984251 | IAL Regional de Marilia                            | Instituto Adolfo Lutz, Interdisciplinary Procedures Center, Strategic Laboratory | Claudio Tavares Sacchi et al |
| EPI_ISL_984252 | IAL Regional de Marilia                            | Instituto Adolfo Lutz, Interdisciplinary Procedures Center, Strategic Laboratory | Claudio Tavares Sacchi et al |
| EPI_ISL_416036 | National Influenza Center - Instituto Adolfo Lutz  | Instituto Adolfo Lutz, Interdisciplinary Procedures Center, Strategic Laboratory | Claudio Tavares Sacchi et al |
| EPI_ISL_468307 | Centro de Vigilancia a Saude de Diadema            | Instituto Adolfo Lutz, Interdisciplinary Procedures Center, Strategic Laboratory | Claudio Tavares Sacchi et al |
| EPI_ISL_984253 | IAL Regional de Marilia                            | Instituto Adolfo Lutz, Interdisciplinary Procedures Center, Strategic Laboratory | Claudio Tavares Sacchi et al |
| EPI_ISL_984254 | IAL Regional de Marilia                            | Instituto Adolfo Lutz, Interdisciplinary Procedures Center, Strategic Laboratory | Claudio Tavares Sacchi et al |
| EPI_ISL_984255 | IAL Regional de Marilia                            | Instituto Adolfo Lutz, Interdisciplinary Procedures Center, Strategic Laboratory | Claudio Tavares Sacchi et al |
| EPI_ISL_984256 | IAL Regional de Marilia                            | Instituto Adolfo Lutz, Interdisciplinary Procedures Center, Strategic Laboratory | Claudio Tavares Sacchi et al |
| EPI_ISL_984257 | IAL Regional de Marilia                            | Instituto Adolfo Lutz, Interdisciplinary Procedures Center, Strategic Laboratory | Claudio Tavares Sacchi et al |
| EPI_ISL_984258 | IAL Regional de Marilia                            | Instituto Adolfo Lutz, Interdisciplinary Procedures Center, Strategic Laboratory | Claudio Tavares Sacchi et al |
| EPI_ISL_984259 | IAL Regional de Marilia                            | Instituto Adolfo Lutz, Interdisciplinary Procedures Center, Strategic Laboratory | Claudio Tavares Sacchi et al |
| EPI_ISL_984260 | IAL Regional de Marilia                            | Instituto Adolfo Lutz, Interdisciplinary Procedures Center, Strategic Laboratory | Claudio Tavares Sacchi et al |
| EPI_ISL_468308 | Hospital Municipal do Tatuape Carmino Caricchio    | Instituto Adolfo Lutz, Interdisciplinary Procedures Center, Strategic Laboratory | Claudio Tavares Sacchi et al |
| EPI_ISL_984261 | IAL Regional de Marilia                            | Instituto Adolfo Lutz, Interdisciplinary Procedures Center, Strategic Laboratory | Claudio Tavares Sacchi et al |
| EPI_ISL_984262 | IAL Regional de Marilia                            | Instituto Adolfo Lutz, Interdisciplinary Procedures Center, Strategic Laboratory | Claudio Tavares Sacchi et al |
| EPI_ISL_984263 | IAL Regional de Bauru                              | Instituto Adolfo Lutz, Interdisciplinary Procedures Center, Strategic Laboratory | Claudio Tavares Sacchi et al |
| EPI_ISL_468310 | Hospital Sao Paulo de Ensino da UNIFESP            | Instituto Adolfo Lutz, Interdisciplinary Procedures Center, Strategic Laboratory | Claudio Tavares Sacchi et al |
| EPI_ISL_468311 | Hospital Municipal Dr Ignacio Proenca de Gouvea    | Instituto Adolfo Lutz, Interdisciplinary Procedures Center, Strategic Laboratory | Claudio Tavares Sacchi et al |
| EPI_ISL_468312 | Hospital Municipal Dr Ignacio Proenca de Gouvea    | Instituto Adolfo Lutz, Interdisciplinary Procedures Center, Strategic Laboratory | Claudio Tavares Sacchi et al |
| EPI_ISL_468313 | Vigilancia Epidemiologica de São Bernardo do Campo | Instituto Adolfo Lutz, Interdisciplinary Procedures Center, Strategic Laboratory | Claudio Tavares Sacchi et al |
| EPI_ISL_468314 | CTA Centro de Testagem e Aconselhamento            | Instituto Adolfo Lutz, Interdisciplinary Procedures Center, Strategic Laboratory | Claudio Tavares Sacchi et al |
| EPI_ISL_515555 | Hospital Geral de Vila Nova Cachoeirinha           | Instituto Adolfo Lutz, Interdisciplinary Procedures Center, Strategic Laboratory | Claudio Tavares Sacchi et al |
| EPI_ISL_515559 | Hospital Sao Paulo de Ensino da Unifesp            | Instituto Adolfo Lutz, Interdisciplinary Procedures Center, Strategic Laboratory | Claudio Tavares Sacchi et al |

|                |                                                                    |                                                                                  |                              |
|----------------|--------------------------------------------------------------------|----------------------------------------------------------------------------------|------------------------------|
| EPI_ISL_515560 | Hospital Sao Paulo de Ensino da Unifesp                            | Instituto Adolfo Lutz, Interdisciplinary Procedures Center, Strategic Laboratory | Claudio Tavares Sacchi et al |
| EPI_ISL_515563 | Hospital Municipal Dr. Jose Soares Hungria                         | Instituto Adolfo Lutz, Interdisciplinary Procedures Center, Strategic Laboratory | Claudio Tavares Sacchi et al |
| EPI_ISL_523958 | Pronto Socorro Municipal de Perus                                  | Instituto Adolfo Lutz, Interdisciplinary Procedures Center, Strategic Laboratory | Claudio Tavares Sacchi et al |
| EPI_ISL_523959 | Pronto Socorro Municipal de Perus                                  | Instituto Adolfo Lutz, Interdisciplinary Procedures Center, Strategic Laboratory | Claudio Tavares Sacchi et al |
| EPI_ISL_523961 | Pronto Socorro Municipal 21 de Junho                               | Instituto Adolfo Lutz, Interdisciplinary Procedures Center, Strategic Laboratory | Claudio Tavares Sacchi et al |
| EPI_ISL_523963 | UBS Vila Silvia                                                    | Instituto Adolfo Lutz, Interdisciplinary Procedures Center, Strategic Laboratory | Claudio Tavares Sacchi et al |
| EPI_ISL_523965 | Hospital do Servidor Público Estadual Francisco Morato de Oliveira | Instituto Adolfo Lutz, Interdisciplinary Procedures Center, Strategic Laboratory | Claudio Tavares Sacchi et al |
| EPI_ISL_523967 | Hospital Sancta Maggiore                                           | Instituto Adolfo Lutz, Interdisciplinary Procedures Center, Strategic Laboratory | Claudio Tavares Sacchi et al |
| EPI_ISL_523969 | Hospital Sao Paulo de Ensino da Unifesp                            | Instituto Adolfo Lutz, Interdisciplinary Procedures Center, Strategic Laboratory | Claudio Tavares Sacchi et al |
| EPI_ISL_523970 | Conjunto Hospitalar do Mandaqui                                    | Instituto Adolfo Lutz, Interdisciplinary Procedures Center, Strategic Laboratory | Claudio Tavares Sacchi et al |
| EPI_ISL_523971 | Hospital Geral Santa Marcelina                                     | Instituto Adolfo Lutz, Interdisciplinary Procedures Center, Strategic Laboratory | Claudio Tavares Sacchi et al |
| EPI_ISL_523972 | Hospital do Servidor Público Estadual Francisco Morato de Oliveira | Instituto Adolfo Lutz, Interdisciplinary Procedures Center, Strategic Laboratory | Claudio Tavares Sacchi et al |
| EPI_ISL_523973 | PS Municipal Dona Maria Antonieta Ferreira de Barros               | Instituto Adolfo Lutz, Interdisciplinary Procedures Center, Strategic Laboratory | Claudio Tavares Sacchi et al |
| EPI_ISL_523974 | Hospital Municipal do Tatuape Carmino Caricchio                    | Instituto Adolfo Lutz, Interdisciplinary Procedures Center, Strategic Laboratory | Claudio Tavares Sacchi et al |
| EPI_ISL_523975 | UPA Tito Lopes                                                     | Instituto Adolfo Lutz, Interdisciplinary Procedures Center, Strategic Laboratory | Claudio Tavares Sacchi et al |
| EPI_ISL_523976 | Hospital Municipal do Tatuape Carmino Caricchio                    | Instituto Adolfo Lutz, Interdisciplinary Procedures Center, Strategic Laboratory | Claudio Tavares Sacchi et al |
| EPI_ISL_523977 | Hosp. Municipal Prof. Dr. Alípio Corrêa Netto                      | Instituto Adolfo Lutz, Interdisciplinary Procedures Center, Strategic Laboratory | Claudio Tavares Sacchi et al |
| EPI_ISL_515564 | Hosp. Municipal Prof. Dr. Alípio Corrêa Netto                      | Instituto Adolfo Lutz, Interdisciplinary Procedures Center, Strategic Laboratory | Claudio Tavares Sacchi et al |
| EPI_ISL_515565 | Hospital do Servidor Público Estadual Francisco Morato de Oliveira | Instituto Adolfo Lutz, Interdisciplinary Procedures Center, Strategic Laboratory | Claudio Tavares Sacchi et al |
| EPI_ISL_523982 | Hospital do Servidor Público Estadual Francisco Morato de Oliveira | Instituto Adolfo Lutz, Interdisciplinary Procedures Center, Strategic Laboratory | Claudio Tavares Sacchi et al |
| EPI_ISL_523983 | UPA Campo Limpo                                                    | Instituto Adolfo Lutz, Interdisciplinary Procedures Center, Strategic Laboratory | Claudio Tavares Sacchi et al |
| EPI_ISL_523984 | Ama Dr Jose Soares Hungria                                         | Instituto Adolfo Lutz, Interdisciplinary Procedures Center, Strategic Laboratory | Claudio Tavares Sacchi et al |
| EPI_ISL_523978 | Hospital do Servidor Público Estadual Francisco Morato de Oliveira | Instituto Adolfo Lutz, Interdisciplinary Procedures Center, Strategic Laboratory | Claudio Tavares Sacchi et al |
| EPI_ISL_523980 | UPA Tito Lopes                                                     | Instituto Adolfo Lutz, Interdisciplinary Procedures Center, Strategic Laboratory | Claudio Tavares Sacchi et al |
| EPI_ISL_523981 | Hospital Sao Paulo de Ensino da Unifesp                            | Instituto Adolfo Lutz, Interdisciplinary Procedures Center, Strategic Laboratory | Claudio Tavares Sacchi et al |
| EPI_ISL_523985 | Hospital Municipal Dr. Benedicto Montenegro                        | Instituto Adolfo Lutz, Interdisciplinary Procedures Center, Strategic Laboratory | Claudio Tavares Sacchi et al |

|                |                                                                    |                                                                                  |                              |
|----------------|--------------------------------------------------------------------|----------------------------------------------------------------------------------|------------------------------|
| EPI_ISL_523986 | Ama Dr Jose Soares Hungria                                         | Instituto Adolfo Lutz, Interdisciplinary Procedures Center, Strategic Laboratory | Claudio Tavares Sacchi et al |
| EPI_ISL_523988 | Hospital Sao Paulo de Ensino da Unifesp                            | Instituto Adolfo Lutz, Interdisciplinary Procedures Center, Strategic Laboratory | Claudio Tavares Sacchi et al |
| EPI_ISL_523989 | AMA Jardim Joamar                                                  | Instituto Adolfo Lutz, Interdisciplinary Procedures Center, Strategic Laboratory | Claudio Tavares Sacchi et al |
| EPI_ISL_523990 | AMA Jardim Peri                                                    | Instituto Adolfo Lutz, Interdisciplinary Procedures Center, Strategic Laboratory | Claudio Tavares Sacchi et al |
| EPI_ISL_523991 | Hospital Municipal Carmen Prudente                                 | Instituto Adolfo Lutz, Interdisciplinary Procedures Center, Strategic Laboratory | Claudio Tavares Sacchi et al |
| EPI_ISL_523992 | Hospital Municipal Carmen Prudente                                 | Instituto Adolfo Lutz, Interdisciplinary Procedures Center, Strategic Laboratory | Claudio Tavares Sacchi et al |
| EPI_ISL_523993 | UPA Campo Limpo                                                    | Instituto Adolfo Lutz, Interdisciplinary Procedures Center, Strategic Laboratory | Claudio Tavares Sacchi et al |
| EPI_ISL_527865 | Hospital e Maternidade São Cristóvão                               | Instituto Adolfo Lutz, Interdisciplinary Procedures Center, Strategic Laboratory | Claudio Tavares Sacchi et al |
| EPI_ISL_527866 | PS Municipal Dr Lauro Ribas Braga                                  | Instituto Adolfo Lutz, Interdisciplinary Procedures Center, Strategic Laboratory | Av. Dr. Arnaldo et al        |
| EPI_ISL_527867 | Pronto Socorro Municipal - Balneario São José                      | Instituto Adolfo Lutz, Interdisciplinary Procedures Center, Strategic Laboratory | Claudio Tavares Sacchi et al |
| EPI_ISL_527868 | Hospital e Maternidade do Braz                                     | Instituto Adolfo Lutz, Interdisciplinary Procedures Center, Strategic Laboratory | Claudio Tavares Sacchi et al |
| EPI_ISL_524468 | Hospital Municipal Vereador Jose Storopoli                         | Instituto Adolfo Lutz, Interdisciplinary Procedures Center, Strategic Laboratory | Claudio Tavares Sacchi et al |
| EPI_ISL_693196 | Hospital Santa Clara                                               | Instituto Adolfo Lutz, Interdisciplinary Procedures Center, Strategic Laboratory | Claudio Tavares Sacchi et al |
| EPI_ISL_693198 | Santa Casa de Misericórdia de Sao Paulo - Hospital Central         | Instituto Adolfo Lutz, Interdisciplinary Procedures Center, Strategic Laboratory | Claudio Tavares Sacchi et al |
| EPI_ISL_693199 | Hospital do Servidor Publico Estadual Francisco Morato de Oliveira | Instituto Adolfo Lutz, Interdisciplinary Procedures Center, Strategic Laboratory | Claudio Tavares Sacchi et al |
| EPI_ISL_524469 | Santa Casa de Misericórdia de Sao Paulo                            | Instituto Adolfo Lutz, Interdisciplinary Procedures Center, Strategic Laboratory | Claudio Tavares Sacchi et al |
| EPI_ISL_534319 | Hospital do Serv Pub ESTAFECO Morato de Oliveira                   | Instituto Adolfo Lutz, Interdisciplinary Procedures Center, Strategic Laboratory | Claudio Tavares Sacchi et al |
| EPI_ISL_534320 | Hospital do Serv Pub ESTAFECO Morato de Oliveira                   | Instituto Adolfo Lutz, Interdisciplinary Procedures Center, Strategic Laboratory | Claudio Tavares Sacchi et al |
| EPI_ISL_524470 | Hospital do Servidor Público Estadual Francisco Morato de Oliveira | Instituto Adolfo Lutz, Interdisciplinary Procedures Center, Strategic Laboratory | Claudio Tavares Sacchi et al |
| EPI_ISL_524466 | PS Municipal Dr Lauro Ribas Braga                                  | Instituto Adolfo Lutz, Interdisciplinary Procedures Center, Strategic Laboratory | Claudio Tavares Sacchi et al |
| EPI_ISL_524467 | Hospital Municipal Dr. Moysés Deutsch                              | Instituto Adolfo Lutz, Interdisciplinary Procedures Center, Strategic Laboratory | Claudio Tavares Sacchi et al |
| EPI_ISL_524462 | Hospital Metropolitan                                              | Instituto Adolfo Lutz, Interdisciplinary Procedures Center, Strategic Laboratory | Claudio Tavares Sacchi et al |
| EPI_ISL_524463 | Hospital Regional de Cotia                                         | Instituto Adolfo Lutz, Interdisciplinary Procedures Center, Strategic Laboratory | Claudio Tavares Sacchi et al |
| EPI_ISL_524464 | Santa Casa de Santa Isabel                                         | Instituto Adolfo Lutz, Interdisciplinary Procedures Center, Strategic Laboratory | Claudio Tavares Sacchi et al |
| EPI_ISL_527858 | Pronto Atendimento Sancta Maggiore Jardim Paulista                 | Instituto Adolfo Lutz, Interdisciplinary Procedures Center, Strategic Laboratory | Claudio Tavares Sacchi et al |
| EPI_ISL_527859 | Hospital Municipal Vereador Jose Storopoli                         | Instituto Adolfo Lutz, Interdisciplinary Procedures Center, Strategic Laboratory | Claudio Tavares Sacchi et al |



|                |                                                           |                                                                                  |                              |
|----------------|-----------------------------------------------------------|----------------------------------------------------------------------------------|------------------------------|
| EPI_ISL_527860 | Hospital Municipal de Parelheiros Josanias Castanha Braga | Instituto Adolfo Lutz, Interdisciplinary Procedures Center, Strategic Laboratory | Claudio Tavares Sacchi et al |
| EPI_ISL_527863 | Hospital Municipal do Tatuape Carmino Caricchio           | Instituto Adolfo Lutz, Interdisciplinary Procedures Center, Strategic Laboratory | Claudio Tavares Sacchi et al |
| EPI_ISL_527856 | Hospital Municipal Prof. Waldomiro de Paula               | Instituto Adolfo Lutz, Interdisciplinary Procedures Center, Strategic Laboratory | Claudio Tavares Sacchi et al |
| EPI_ISL_527857 | Hospital Regional Vale do Ribeira                         | Instituto Adolfo Lutz, Interdisciplinary Procedures Center, Strategic Laboratory | Claudio Tavares Sacchi et al |
| EPI_ISL_527862 | Hospital Municipal de Urgência                            | Instituto Adolfo Lutz, Interdisciplinary Procedures Center, Strategic Laboratory | Claudio Tavares Sacchi et al |
| EPI_ISL_527861 | Hospital e Maternidade Celso Pierro                       | Instituto Adolfo Lutz, Interdisciplinary Procedures Center, Strategic Laboratory | Av. Dr. Arnaldo et al        |
| EPI_ISL_527864 | Hospital e Pronto Socorro Comunitário Vila Iolanda        | Instituto Adolfo Lutz, Interdisciplinary Procedures Center, Strategic Laboratory | Claudio Tavares Sacchi et al |
| EPI_ISL_527869 | Hospital Municipal Carmen Prudente                        | Instituto Adolfo Lutz, Interdisciplinary Procedures Center, Strategic Laboratory | Claudio Tavares Sacchi et al |
| EPI_ISL_527870 | Hospital Municipal Mário Gatti                            | Instituto Adolfo Lutz, Interdisciplinary Procedures Center, Strategic Laboratory | Claudio Tavares Sacchi et al |
| EPI_ISL_534322 | PS Mun Julio Tupy                                         | Instituto Adolfo Lutz, Interdisciplinary Procedures Center, Strategic Laboratory | Claudio Tavares Sacchi et al |
| EPI_ISL_534323 | Hospital e Pronto Socorro Comunitario Vila Yolanda        | Instituto Adolfo Lutz, Interdisciplinary Procedures Center, Strategic Laboratory | Claudio Tavares Sacchi et al |
| EPI_ISL_534324 | Hospital Mun Ver Jose Storopoli                           | Instituto Adolfo Lutz, Interdisciplinary Procedures Center, Strategic Laboratory | Claudio Tavares Sacchi et al |
| EPI_ISL_534325 | Unidade de Vigilancia em Saude de Guarulhos               | Instituto Adolfo Lutz, Interdisciplinary Procedures Center, Strategic Laboratory | Claudio Tavares Sacchi et al |
| EPI_ISL_534311 | UPA III 26 de Agosto                                      | Instituto Adolfo Lutz, Interdisciplinary Procedures Center, Strategic Laboratory | Claudio Tavares Sacchi et al |
| EPI_ISL_547570 | PS Municipal Dr Augusto Gomes de Mattos                   | Instituto Adolfo Lutz, Interdisciplinary Procedures Center, Strategic Laboratory | Claudio Tavares Sacchi et al |
| EPI_ISL_534312 | Distrito Sanitario Sul                                    | Instituto Adolfo Lutz, Interdisciplinary Procedures Center, Strategic Laboratory | Claudio Tavares Sacchi et al |
| EPI_ISL_534313 | Hospital da Sta Casa de Sto Amaro                         | Instituto Adolfo Lutz, Interdisciplinary Procedures Center, Strategic Laboratory | Claudio Tavares Sacchi et al |
| EPI_ISL_534314 | Hospital Universitario da USP de SP                       | Instituto Adolfo Lutz, Interdisciplinary Procedures Center, Strategic Laboratory | Claudio Tavares Sacchi et al |
| EPI_ISL_534315 | Serviço de Verificação de Óbitos SVO Guarulhos            | Instituto Adolfo Lutz, Interdisciplinary Procedures Center, Strategic Laboratory | Claudio Tavares Sacchi et al |
| EPI_ISL_534316 | OS Mun Santana Lauro Ribas Braga                          | Instituto Adolfo Lutz, Interdisciplinary Procedures Center, Strategic Laboratory | Claudio Tavares Sacchi et al |
| EPI_ISL_534317 | Hospital Geral de Itapevi                                 | Instituto Adolfo Lutz, Interdisciplinary Procedures Center, Strategic Laboratory | Claudio Tavares Sacchi et al |
| EPI_ISL_534318 | Hospital Municipal Antonio Giglio                         | Instituto Adolfo Lutz, Interdisciplinary Procedures Center, Strategic Laboratory | Claudio Tavares Sacchi et al |
| EPI_ISL_534321 | PS e Maternidade Nair Fonseca Leitaó Arantes              | Instituto Adolfo Lutz, Interdisciplinary Procedures Center, Strategic Laboratory | Claudio Tavares Sacchi et al |
| EPI_ISL_534326 | Notre Dame Intermedica Saude AS                           | Instituto Adolfo Lutz, Interdisciplinary Procedures Center, Strategic Laboratory | Claudio Tavares Sacchi et al |
| EPI_ISL_547571 | Hospital Municipal Antônio Giglio                         | Instituto Adolfo Lutz, Interdisciplinary Procedures Center, Strategic Laboratory | Claudio Tavares Sacchi et al |
| EPI_ISL_547573 | Vigilância em Saúde de Cajamar                            | Instituto Adolfo Lutz, Interdisciplinary Procedures Center, Strategic Laboratory | Claudio Tavares Sacchi et al |

|                |                                                           |                                                                                  |                              |
|----------------|-----------------------------------------------------------|----------------------------------------------------------------------------------|------------------------------|
| EPI_ISL_583495 | Serviço de Verificação de Óbitos SVO Guarulhos            | Instituto Adolfo Lutz, Interdisciplinary Procedures Center, Strategic Laboratory | Claudio Tavares Sacchi et al |
| EPI_ISL_693204 | Pronto Socorro Dr. Conrado Cesarino Nuvolini              | Instituto Adolfo Lutz, Interdisciplinary Procedures Center, Strategic Laboratory | Claudio Tavares Sacchi et al |
| EPI_ISL_583496 | UPA Jandira                                               | Instituto Adolfo Lutz, Interdisciplinary Procedures Center, Strategic Laboratory | Claudio Tavares Sacchi et al |
| EPI_ISL_547574 | Hospital Universitario da USP                             | Instituto Adolfo Lutz, Interdisciplinary Procedures Center, Strategic Laboratory | Claudio Tavares Sacchi et al |
| EPI_ISL_547575 | SVO Jundiá                                                | Instituto Adolfo Lutz, Interdisciplinary Procedures Center, Strategic Laboratory | Claudio Tavares Sacchi et al |
| EPI_ISL_547576 | Secretaria Municipal de Saúde                             | Instituto Adolfo Lutz, Interdisciplinary Procedures Center, Strategic Laboratory | Claudio Tavares Sacchi et al |
| EPI_ISL_583497 | Complexo Hospitalar Ouro Verde de Campinas                | Instituto Adolfo Lutz, Interdisciplinary Procedures Center, Strategic Laboratory | Claudio Tavares Sacchi et al |
| EPI_ISL_583498 | Hospital Municipal Dr. Waldemar Tebaldi                   | Instituto Adolfo Lutz, Interdisciplinary Procedures Center, Strategic Laboratory | Claudio Tavares Sacchi et al |
| EPI_ISL_693206 | Hospital Municipal Mario Gatti                            | Instituto Adolfo Lutz, Interdisciplinary Procedures Center, Strategic Laboratory | Claudio Tavares Sacchi et al |
| EPI_ISL_693207 | Cs II Doutor Antonio Vicoso Moreira de Rezende            | Instituto Adolfo Lutz, Interdisciplinary Procedures Center, Strategic Laboratory | Claudio Tavares Sacchi et al |
| EPI_ISL_583499 | Distrito Sanitario Sul Campinas                           | Instituto Adolfo Lutz, Interdisciplinary Procedures Center, Strategic Laboratory | Claudio Tavares Sacchi et al |
| EPI_ISL_583500 | Centro de Saude I Tacito Leite de Carvalho e Silva        | Instituto Adolfo Lutz, Interdisciplinary Procedures Center, Strategic Laboratory | Claudio Tavares Sacchi et al |
| EPI_ISL_603023 | Vigilância em Saúde Visa Sul                              | Instituto Adolfo Lutz, Interdisciplinary Procedures Center, Strategic Laboratory | Claudio Tavares Sacchi et al |
| EPI_ISL_603024 | Santa Casa de Misericórdia de Araçatuba                   | Instituto Adolfo Lutz, Interdisciplinary Procedures Center, Strategic Laboratory | Claudio Tavares Sacchi et al |
| EPI_ISL_603025 | UPA Central de Caraguatatuba                              | Instituto Adolfo Lutz, Interdisciplinary Procedures Center, Strategic Laboratory | Claudio Tavares Sacchi et al |
| EPI_ISL_603026 | Santa Casa da Misericórdia de Presidente Prudente         | Instituto Adolfo Lutz, Interdisciplinary Procedures Center, Strategic Laboratory | Claudio Tavares Sacchi et al |
| EPI_ISL_603027 | Santa Casa de Misericórdia de Araçatuba                   | Instituto Adolfo Lutz, Interdisciplinary Procedures Center, Strategic Laboratory | Claudio Tavares Sacchi et al |
| EPI_ISL_574596 | CS II Dr. Antonio Vicoso Moreira de Rezende Sumare        | Instituto Adolfo Lutz, Interdisciplinary Procedures Center, Strategic Laboratory | Claudio Tavares Sacchi et al |
| EPI_ISL_574597 | Secretaria Municipal de Saude de Jarinu                   | Instituto Adolfo Lutz, Interdisciplinary Procedures Center, Strategic Laboratory | Claudio Tavares Sacchi et al |
| EPI_ISL_693213 | Hospital E Maternidade Municipal Governador Mario Covas   | Instituto Adolfo Lutz, Interdisciplinary Procedures Center, Strategic Laboratory | Claudio Tavares Sacchi et al |
| EPI_ISL_574598 | Servico de Verificacao de Obito SVO                       | Instituto Adolfo Lutz, Interdisciplinary Procedures Center, Strategic Laboratory | Claudio Tavares Sacchi et al |
| EPI_ISL_583502 | Serv de Vig Sanitaria Epidemio e CTRL de Zoonoses Guaruja | Instituto Adolfo Lutz, Interdisciplinary Procedures Center, Strategic Laboratory | Claudio Tavares Sacchi et al |
| EPI_ISL_583503 | CTA Centro de Testagem e Aconselhamento                   | Instituto Adolfo Lutz, Interdisciplinary Procedures Center, Strategic Laboratory | Claudio Tavares Sacchi et al |
| EPI_ISL_583504 | Casa de Saude Stella Maris                                | Instituto Adolfo Lutz, Interdisciplinary Procedures Center, Strategic Laboratory | Claudio Tavares Sacchi et al |
| EPI_ISL_583505 | Casa de Saude Stella Maris                                | Instituto Adolfo Lutz, Interdisciplinary Procedures Center, Strategic Laboratory | Claudio Tavares Sacchi et al |
| EPI_ISL_603028 | Hospital Municipal Santa Ana                              | Instituto Adolfo Lutz, Interdisciplinary Procedures Center, Strategic Laboratory | Claudio Tavares Sacchi et al |

|                |                                                         |                                                                                  |                              |
|----------------|---------------------------------------------------------|----------------------------------------------------------------------------------|------------------------------|
| EPI_ISL_603029 | Hospital Municipal Mário Gatti                          | Instituto Adolfo Lutz, Interdisciplinary Procedures Center, Strategic Laboratory | Claudio Tavares Sacchi et al |
| EPI_ISL_693208 | Hospital Municipal Antonio Giglio                       | Instituto Adolfo Lutz, Interdisciplinary Procedures Center, Strategic Laboratory | Claudio Tavares Sacchi et al |
| EPI_ISL_693209 | Hospital Municipal Antonio Giglio                       | Instituto Adolfo Lutz, Interdisciplinary Procedures Center, Strategic Laboratory | Claudio Tavares Sacchi et al |
| EPI_ISL_547577 | Hospital e Maternidade Nossa Senhora das Graças         | Instituto Adolfo Lutz, Interdisciplinary Procedures Center, Strategic Laboratory | Claudio Tavares Sacchi et al |
| EPI_ISL_547578 | Hospital Doutor Domingos Leonardo Cerávolo              | Instituto Adolfo Lutz, Interdisciplinary Procedures Center, Strategic Laboratory | Claudio Tavares Sacchi et al |
| EPI_ISL_693210 | Pronto-Socorro Dr. Osmar Mesquita                       | Instituto Adolfo Lutz, Interdisciplinary Procedures Center, Strategic Laboratory | Claudio Tavares Sacchi et al |
| EPI_ISL_693211 | Santa Casa de Misericórdia e Maternidade                | Instituto Adolfo Lutz, Interdisciplinary Procedures Center, Strategic Laboratory | Claudio Tavares Sacchi et al |
| EPI_ISL_547579 | Santa Casa de Misericórdia de Araçatuba                 | Instituto Adolfo Lutz, Interdisciplinary Procedures Center, Strategic Laboratory | Claudio Tavares Sacchi et al |
| EPI_ISL_547580 | Santa Casa da Misericórdia de Presidente Prudente       | Instituto Adolfo Lutz, Interdisciplinary Procedures Center, Strategic Laboratory | Claudio Tavares Sacchi et al |
| EPI_ISL_693212 | Santa Casa de Misericórdia de Braganca Paulista         | Instituto Adolfo Lutz, Interdisciplinary Procedures Center, Strategic Laboratory | Claudio Tavares Sacchi et al |
| EPI_ISL_574594 | Hospital Escola da Universidade de Taubate              | Instituto Adolfo Lutz, Interdisciplinary Procedures Center, Strategic Laboratory | Claudio Tavares Sacchi et al |
| EPI_ISL_603021 | Pronto Socorro Dr. Conrado Cesarino Nuvolini            | Instituto Adolfo Lutz, Interdisciplinary Procedures Center, Strategic Laboratory | Claudio Tavares Sacchi et al |
| EPI_ISL_603022 | Departamento de Vigilância à Saúde                      | Instituto Adolfo Lutz, Interdisciplinary Procedures Center, Strategic Laboratory | Claudio Tavares Sacchi et al |
| EPI_ISL_603030 | Hospital Domingos Leonardo Ceravolo Presidente Prudente | Instituto Adolfo Lutz, Interdisciplinary Procedures Center, Strategic Laboratory | Claudio Tavares Sacchi et al |
| EPI_ISL_603031 | Santa Casa de Presidente Epitácio                       | Instituto Adolfo Lutz, Interdisciplinary Procedures Center, Strategic Laboratory | Claudio Tavares Sacchi et al |
| EPI_ISL_603032 | Santa Casa da Misericórdia de Presidente Prudente       | Instituto Adolfo Lutz, Interdisciplinary Procedures Center, Strategic Laboratory | Claudio Tavares Sacchi et al |
| EPI_ISL_603033 | Vigilancia Epidemiologica de São Bernardo do Campo      | Instituto Adolfo Lutz, Interdisciplinary Procedures Center, Strategic Laboratory | Claudio Tavares Sacchi et al |
| EPI_ISL_603034 | Departamento de Vigilância à Saúde                      | Instituto Adolfo Lutz, Interdisciplinary Procedures Center, Strategic Laboratory | Claudio Tavares Sacchi et al |
| EPI_ISL_603035 | Secretaria Municipal de Saúde                           | Instituto Adolfo Lutz, Interdisciplinary Procedures Center, Strategic Laboratory | Claudio Tavares Sacchi et al |
| EPI_ISL_603036 | Hospital Santa Ana                                      | Instituto Adolfo Lutz, Interdisciplinary Procedures Center, Strategic Laboratory | Claudio Tavares Sacchi et al |
| EPI_ISL_603037 | Hospital Geral de Pedreira                              | Instituto Adolfo Lutz, Interdisciplinary Procedures Center, Strategic Laboratory | Claudio Tavares Sacchi et al |
| EPI_ISL_603038 | Santa Casa de Misericórdia de Araçatuba                 | Instituto Adolfo Lutz, Interdisciplinary Procedures Center, Strategic Laboratory | Claudio Tavares Sacchi et al |
| EPI_ISL_603039 | Hospital Municipal Mário Gatti                          | Instituto Adolfo Lutz, Interdisciplinary Procedures Center, Strategic Laboratory | Claudio Tavares Sacchi et al |
| EPI_ISL_574595 | Hospital Geral de Vila Penteadado Dr. Jose Pamgella     | Instituto Adolfo Lutz, Interdisciplinary Procedures Center, Strategic Laboratory | Claudio Tavares Sacchi et al |
| EPI_ISL_574577 | Hospital Municipal Dr. Ignacio Proença de Gouvea        | Instituto Adolfo Lutz, Interdisciplinary Procedures Center, Strategic Laboratory | Claudio Tavares Sacchi et al |
| EPI_ISL_583490 | Hospital Estadual Sumare                                | Instituto Adolfo Lutz, Interdisciplinary Procedures Center, Strategic Laboratory | Claudio Tavares Sacchi et al |

|                |                                                           |                                                                                  |                              |
|----------------|-----------------------------------------------------------|----------------------------------------------------------------------------------|------------------------------|
| EPI_ISL_583491 | Centro de Saude Esf IV Zona Rual Domingos de SJ Rio Pardo | Instituto Adolfo Lutz, Interdisciplinary Procedures Center, Strategic Laboratory | Claudio Tavares Sacchi et al |
| EPI_ISL_583492 | Santa Casa Anna Cintra                                    | Instituto Adolfo Lutz, Interdisciplinary Procedures Center, Strategic Laboratory | Claudio Tavares Sacchi et al |
| EPI_ISL_471539 | Hospital Universitario da USP Sao Paulo                   | Instituto Adolfo Lutz, Interdisciplinary Procedures Center, Strategic Laboratory | Claudio Tavares Sacchi et al |
| EPI_ISL_574578 | Hospital Municipal Mário Gatti                            | Instituto Adolfo Lutz, Interdisciplinary Procedures Center, Strategic Laboratory | Claudio Tavares Sacchi et al |
| EPI_ISL_574579 | Hospital Municipal Dr. Ignacio Proença de Gouvea          | Instituto Adolfo Lutz, Interdisciplinary Procedures Center, Strategic Laboratory | Claudio Tavares Sacchi et al |
| EPI_ISL_574580 | Hospital Cidade Tiradentes Carmen Prudente                | Instituto Adolfo Lutz, Interdisciplinary Procedures Center, Strategic Laboratory | Claudio Tavares Sacchi et al |
| EPI_ISL_574582 | Hospital Municipal Dr. Jose Soares Hungria                | Instituto Adolfo Lutz, Interdisciplinary Procedures Center, Strategic Laboratory | Claudio Tavares Sacchi et al |
| EPI_ISL_574583 | Secretaria Municipal de Saude de Jandira                  | Instituto Adolfo Lutz, Interdisciplinary Procedures Center, Strategic Laboratory | Claudio Tavares Sacchi et al |
| EPI_ISL_583493 | Vigilância em Saúde de Cajamar                            | Instituto Adolfo Lutz, Interdisciplinary Procedures Center, Strategic Laboratory | Claudio Tavares Sacchi et al |
| EPI_ISL_574588 | Hospital Estadual Sumare                                  | Instituto Adolfo Lutz, Interdisciplinary Procedures Center, Strategic Laboratory | Claudio Tavares Sacchi et al |
| EPI_ISL_583494 | CS II Dr. Antonio Vicoso Moreira de Rezende Sumare        | Instituto Adolfo Lutz, Interdisciplinary Procedures Center, Strategic Laboratory | Claudio Tavares Sacchi et al |
| EPI_ISL_574589 | Hospital Municipal Dr. Jose Soares Hungria                | Instituto Adolfo Lutz, Interdisciplinary Procedures Center, Strategic Laboratory | Claudio Tavares Sacchi et al |
| EPI_ISL_574590 | Unidade de Printo Atendimento UPA I Santa Isabel          | Instituto Adolfo Lutz, Interdisciplinary Procedures Center, Strategic Laboratory | Claudio Tavares Sacchi et al |
| EPI_ISL_468315 | Hospital Municipal do Tatuape Carmino Caricchio           | Instituto Adolfo Lutz, Interdisciplinary Procedures Center, Strategic Laboratory | Claudio Tavares Sacchi et al |
| EPI_ISL_468316 | UPA Vila Assis                                            | Instituto Adolfo Lutz, Interdisciplinary Procedures Center, Strategic Laboratory | Claudio Tavares Sacchi et al |
| EPI_ISL_468318 | Hospital Universitario da USP                             | Instituto Adolfo Lutz, Interdisciplinary Procedures Center, Strategic Laboratory | Claudio Tavares Sacchi et al |
| EPI_ISL_468319 | Vigilancia Epidemiologica de São Bernardo do Campo        | Instituto Adolfo Lutz, Interdisciplinary Procedures Center, Strategic Laboratory | Claudio Tavares Sacchi et al |
| EPI_ISL_468320 | Secretaria Municipal de Saude de Hortolandia              | Instituto Adolfo Lutz, Interdisciplinary Procedures Center, Strategic Laboratory | Claudio Tavares Sacchi et al |
| EPI_ISL_524465 | PS Municipal Dr. Caetano Virgílio Neto                    | Instituto Adolfo Lutz, Interdisciplinary Procedures Center, Strategic Laboratory | Claudio Tavares Sacchi et al |
| EPI_ISL_471556 | Pronto Socorro Jose Ibrahin                               | Instituto Adolfo Lutz, Interdisciplinary Procedures Center, Strategic Laboratory | Claudio Tavares Sacchi et al |
| EPI_ISL_468321 | Hospital Universitario da USP                             | Instituto Adolfo Lutz, Interdisciplinary Procedures Center, Strategic Laboratory | Claudio Tavares Sacchi et al |
| EPI_ISL_471562 | Hosp. Municipal Prof. Dr. Alípio Corrêa Netto             | Instituto Adolfo Lutz, Interdisciplinary Procedures Center, Strategic Laboratory | Claudio Tavares Sacchi et al |
| EPI_ISL_471581 | Hosp. Municipal Prof. Dr. Alípio Corrêa Netto             | Instituto Adolfo Lutz, Interdisciplinary Procedures Center, Strategic Laboratory | Claudio Tavares Sacchi et al |
| EPI_ISL_471582 | Hosp. Municipal Prof. Dr. Alípio Corrêa Netto             | Instituto Adolfo Lutz, Interdisciplinary Procedures Center, Strategic Laboratory | Claudio Tavares Sacchi et al |
| EPI_ISL_471647 | Hospital Municipal de Barueri Dr. Francisco Moran         | Instituto Adolfo Lutz, Interdisciplinary Procedures Center, Strategic Laboratory | Claudio Tavares Sacchi et al |
| EPI_ISL_471648 | UBS e Pronto Socorro Jd. Jacira                           | Instituto Adolfo Lutz, Interdisciplinary Procedures Center, Strategic Laboratory | Claudio Tavares Sacchi et al |

|                |                                                         |                                                                                  |                              |
|----------------|---------------------------------------------------------|----------------------------------------------------------------------------------|------------------------------|
| EPI_ISL_515545 | Hospital Sao Paulo de Ensino da Unifesp                 | Instituto Adolfo Lutz, Interdisciplinary Procedures Center, Strategic Laboratory | Claudio Tavares Sacchi et al |
| EPI_ISL_471546 | AMA DR Jose Soares Hungria                              | Instituto Adolfo Lutz, Interdisciplinary Procedures Center, Strategic Laboratory | Claudio Tavares Sacchi et al |
| EPI_ISL_515551 | Hospital Municipal do Tatuape Carmino Caricchio         | Instituto Adolfo Lutz, Interdisciplinary Procedures Center, Strategic Laboratory | Claudio Tavares Sacchi et al |
| EPI_ISL_471551 | Hospital Sao Paulo de Ensino da Unifesp                 | Instituto Adolfo Lutz, Interdisciplinary Procedures Center, Strategic Laboratory | Claudio Tavares Sacchi et al |
| EPI_ISL_471552 | Hospital Sancta Maggiore                                | Instituto Adolfo Lutz, Interdisciplinary Procedures Center, Strategic Laboratory | Claudio Tavares Sacchi et al |
| EPI_ISL_471554 | Hospital Bosque da Saúde                                | Instituto Adolfo Lutz, Interdisciplinary Procedures Center, Strategic Laboratory | Claudio Tavares Sacchi et al |
| EPI_ISL_574591 | Hospital Domingos Leonardo Ceravolo Presidente Prudente | Instituto Adolfo Lutz, Interdisciplinary Procedures Center, Strategic Laboratory | Claudio Tavares Sacchi et al |
| EPI_ISL_574592 | Hospital Domingos Leonardo Ceravolo Presidente Prudente | Instituto Adolfo Lutz, Interdisciplinary Procedures Center, Strategic Laboratory | Claudio Tavares Sacchi et al |
| EPI_ISL_574593 | CS II Dr. Antonio Vicoso Moreira de Rezende Sumare      | Instituto Adolfo Lutz, Interdisciplinary Procedures Center, Strategic Laboratory | Claudio Tavares Sacchi et al |
| EPI_ISL_693195 | Hospital e Pronto Socorro Portinari                     | Instituto Adolfo Lutz, Interdisciplinary Procedures Center, Strategic Laboratory | Claudio Tavares Sacchi et al |
| EPI_ISL_693200 | Hospital e Maternidade Mairipora                        | Instituto Adolfo Lutz, Interdisciplinary Procedures Center, Strategic Laboratory | Claudio Tavares Sacchi et al |
| EPI_ISL_693201 | Hospital Sao Paulo de Ensino da Unifesp                 | Instituto Adolfo Lutz, Interdisciplinary Procedures Center, Strategic Laboratory | Claudio Tavares Sacchi et al |
| EPI_ISL_693202 | Pronto Socorro Municipal Prof. Joao Catarin Mezomo      | Instituto Adolfo Lutz, Interdisciplinary Procedures Center, Strategic Laboratory | Claudio Tavares Sacchi et al |
| EPI_ISL_693203 | Hospital Municipal Doutor Arthur Ribeiro de Saboya      | Instituto Adolfo Lutz, Interdisciplinary Procedures Center, Strategic Laboratory | Claudio Tavares Sacchi et al |
| EPI_ISL_693205 | Hospital de Campanha Covid-19 Assis                     | Instituto Adolfo Lutz, Interdisciplinary Procedures Center, Strategic Laboratory | Claudio Tavares Sacchi et al |
| EPI_ISL_693214 | Unidade de Pronto Atendimento Central de Caraguatatuba  | Instituto Adolfo Lutz, Interdisciplinary Procedures Center, Strategic Laboratory | Claudio Tavares Sacchi et al |
| EPI_ISL_735396 | Hospital de Camplanha COVID 19 SER                      | Instituto Adolfo Lutz, Interdisciplinary Procedures Center, Strategic Laboratory | Claudio Tavares Sacchi et al |
| EPI_ISL_735397 | Unidade Respiratória Nova Hortolandia                   | Instituto Adolfo Lutz, Interdisciplinary Procedures Center, Strategic Laboratory | Claudio Tavares Sacchi et al |
| EPI_ISL_693215 | Secretaria Municipal de Saúde de Iracemapolis           | Instituto Adolfo Lutz, Interdisciplinary Procedures Center, Strategic Laboratory | Claudio Tavares Sacchi et al |
| EPI_ISL_693216 | Unidade de Vigilância Epidemiológica de Araras          | Instituto Adolfo Lutz, Interdisciplinary Procedures Center, Strategic Laboratory | Claudio Tavares Sacchi et al |
| EPI_ISL_693217 | Unidade de Vigilância Epidemiológica de Araras          | Instituto Adolfo Lutz, Interdisciplinary Procedures Center, Strategic Laboratory | Claudio Tavares Sacchi et al |
| EPI_ISL_693218 | Hospital Domingos Leonardo Ceravolo Presidente Prudente | Instituto Adolfo Lutz, Interdisciplinary Procedures Center, Strategic Laboratory | Claudio Tavares Sacchi et al |
| EPI_ISL_693219 | Santa Casa da Misericórdia de Presidente Prudente       | Instituto Adolfo Lutz, Interdisciplinary Procedures Center, Strategic Laboratory | Claudio Tavares Sacchi et al |
| EPI_ISL_693220 | Laboratório Municipal de Piracicaba                     | Instituto Adolfo Lutz, Interdisciplinary Procedures Center, Strategic Laboratory | Claudio Tavares Sacchi et al |
| EPI_ISL_693221 | Secretaria Municipal de Saúde de Birigui                | Instituto Adolfo Lutz, Interdisciplinary Procedures Center, Strategic Laboratory | Claudio Tavares Sacchi et al |
| EPI_ISL_693222 | Secretaria Municipal de Saúde de Birigui                | Instituto Adolfo Lutz, Interdisciplinary Procedures Center, Strategic Laboratory | Claudio Tavares Sacchi et al |

|                |                                                                    |                                                                                  |                              |
|----------------|--------------------------------------------------------------------|----------------------------------------------------------------------------------|------------------------------|
| EPI_ISL_515525 | National Influenza Center - Instituto Adolfo Lutz                  | Instituto Adolfo Lutz, Interdisciplinary Procedures Center, Strategic Laboratory | Claudio Tavares Sacchi et al |
| EPI_ISL_471545 | Hospital Sao Paulo de Ensino da Unifesp                            | Instituto Adolfo Lutz, Interdisciplinary Procedures Center, Strategic Laboratory | Claudio Tavares Sacchi et al |
| EPI_ISL_515526 | Hospital Municipal do Tatuape Carmino Caricchio                    | Instituto Adolfo Lutz, Interdisciplinary Procedures Center, Strategic Laboratory | Claudio Tavares Sacchi et al |
| EPI_ISL_471548 | Hospital do Servidor Público Estadual Francisco Morato de Oliveira | Instituto Adolfo Lutz, Interdisciplinary Procedures Center, Strategic Laboratory | Claudio Tavares Sacchi et al |
| EPI_ISL_471549 | Hospital Municipal Carmen Prudente                                 | Instituto Adolfo Lutz, Interdisciplinary Procedures Center, Strategic Laboratory | Claudio Tavares Sacchi et al |
| EPI_ISL_515552 | Hospital Municipal do Tatuape Carmino Caricchio                    | Instituto Adolfo Lutz, Interdisciplinary Procedures Center, Strategic Laboratory | Claudio Tavares Sacchi et al |
| EPI_ISL_515553 | Hospital Municipal Dr. Ignacio Proença de Gouvea                   | Instituto Adolfo Lutz, Interdisciplinary Procedures Center, Strategic Laboratory | Claudio Tavares Sacchi et al |
| EPI_ISL_515557 | Hospital Municipal Dr. Moysés Deutsch                              | Instituto Adolfo Lutz, Interdisciplinary Procedures Center, Strategic Laboratory | Claudio Tavares Sacchi et al |
| EPI_ISL_515561 | Hospital Montemagno                                                | Instituto Adolfo Lutz, Interdisciplinary Procedures Center, Strategic Laboratory | Claudio Tavares Sacchi et al |
| EPI_ISL_515562 | Hospital Municipal Doutor Alexandre Zaido                          | Instituto Adolfo Lutz, Interdisciplinary Procedures Center, Strategic Laboratory | Claudio Tavares Sacchi et al |
| EPI_ISL_515566 | PS Municipal Dr Lauro Ribas Braga                                  | Instituto Adolfo Lutz, Interdisciplinary Procedures Center, Strategic Laboratory | Claudio Tavares Sacchi et al |
| EPI_ISL_515527 | Hospital Santa Clara                                               | Instituto Adolfo Lutz, Interdisciplinary Procedures Center, Strategic Laboratory | Claudio Tavares Sacchi et al |
| EPI_ISL_515528 | Hospital Sao Paulo de Ensino da Unifesp                            | Instituto Adolfo Lutz, Interdisciplinary Procedures Center, Strategic Laboratory | Claudio Tavares Sacchi et al |
| EPI_ISL_515529 | Pronto Socorro Municipal Julio Tupy                                | Instituto Adolfo Lutz, Interdisciplinary Procedures Center, Strategic Laboratory | Claudio Tavares Sacchi et al |
| EPI_ISL_515541 | Hospital Montemagno                                                | Instituto Adolfo Lutz, Interdisciplinary Procedures Center, Strategic Laboratory | Claudio Tavares Sacchi et al |
| EPI_ISL_515544 | Ama Dr Jose Soares Hungria                                         | Instituto Adolfo Lutz, Interdisciplinary Procedures Center, Strategic Laboratory | Claudio Tavares Sacchi et al |
| EPI_ISL_515546 | Hospital Municipal do Tatuape Carmino Caricchio                    | Instituto Adolfo Lutz, Interdisciplinary Procedures Center, Strategic Laboratory | Claudio Tavares Sacchi et al |
| EPI_ISL_515547 | Centro Medico da Policia Militar do Estado de Sao Paulo            | Instituto Adolfo Lutz, Interdisciplinary Procedures Center, Strategic Laboratory | Claudio Tavares Sacchi et al |
| EPI_ISL_515548 | Hospital Municipal Dr. Jose Soares Hungria                         | Instituto Adolfo Lutz, Interdisciplinary Procedures Center, Strategic Laboratory | Claudio Tavares Sacchi et al |
| EPI_ISL_515550 | UPA Vila Santa Catarina                                            | Instituto Adolfo Lutz, Interdisciplinary Procedures Center, Strategic Laboratory | Claudio Tavares Sacchi et al |
| EPI_ISL_515554 | Pronto Socorro Municipal de Perus                                  | Instituto Adolfo Lutz, Interdisciplinary Procedures Center, Strategic Laboratory | Claudio Tavares Sacchi et al |
| EPI_ISL_693223 | Laboratório Municipal de Piracicaba                                | Instituto Adolfo Lutz, Interdisciplinary Procedures Center, Strategic Laboratory | Claudio Tavares Sacchi et al |
| EPI_ISL_693224 | Laboratório Municipal de Piracicaba                                | Instituto Adolfo Lutz, Interdisciplinary Procedures Center, Strategic Laboratory | Claudio Tavares Sacchi et al |
| EPI_ISL_693225 | Ubs Vila Rosa - Olímpia Gomes De Almeida                           | Instituto Adolfo Lutz, Interdisciplinary Procedures Center, Strategic Laboratory | Claudio Tavares Sacchi et al |
| EPI_ISL_693226 | Unidade de Pronto Atendimento Sao José                             | Instituto Adolfo Lutz, Interdisciplinary Procedures Center, Strategic Laboratory | Claudio Tavares Sacchi et al |
| EPI_ISL_693227 | UBS Vila Marchi                                                    | Instituto Adolfo Lutz, Interdisciplinary Procedures Center, Strategic Laboratory | Claudio Tavares Sacchi et al |

|                |                                                         |                                                                                  |                              |
|----------------|---------------------------------------------------------|----------------------------------------------------------------------------------|------------------------------|
| EPI_ISL_693228 | Secretaria Municipal de Sorocaba                        | Instituto Adolfo Lutz, Interdisciplinary Procedures Center, Strategic Laboratory | Claudio Tavares Sacchi et al |
| EPI_ISL_693229 | Hospital 8 de Maio                                      | Instituto Adolfo Lutz, Interdisciplinary Procedures Center, Strategic Laboratory | Claudio Tavares Sacchi et al |
| EPI_ISL_693230 | Hospital e Pronto Socorro Portinari                     | Instituto Adolfo Lutz, Interdisciplinary Procedures Center, Strategic Laboratory | Claudio Tavares Sacchi et al |
| EPI_ISL_693231 | Pronto Socorro Municipal de Santa Branca                | Instituto Adolfo Lutz, Interdisciplinary Procedures Center, Strategic Laboratory | Claudio Tavares Sacchi et al |
| EPI_ISL_693232 | Hospital e Pronto Socorro Portinari                     | Instituto Adolfo Lutz, Interdisciplinary Procedures Center, Strategic Laboratory | Claudio Tavares Sacchi et al |
| EPI_ISL_693233 | Hospital Santa Cruz                                     | Instituto Adolfo Lutz, Interdisciplinary Procedures Center, Strategic Laboratory | Claudio Tavares Sacchi et al |
| EPI_ISL_693234 | Upa Vereador Jose Da Rocha Goncalves                    | Instituto Adolfo Lutz, Interdisciplinary Procedures Center, Strategic Laboratory | Claudio Tavares Sacchi et al |
| EPI_ISL_693235 | Casmi Centro Atendimento Saude da Mulher e Infancia     | Instituto Adolfo Lutz, Interdisciplinary Procedures Center, Strategic Laboratory | Claudio Tavares Sacchi et al |
| EPI_ISL_693236 | Hospital Santa Marcelina Sao Paulo                      | Instituto Adolfo Lutz, Interdisciplinary Procedures Center, Strategic Laboratory | Claudio Tavares Sacchi et al |
| EPI_ISL_693237 | UPA Santa Isabel                                        | Instituto Adolfo Lutz, Interdisciplinary Procedures Center, Strategic Laboratory | Claudio Tavares Sacchi et al |
| EPI_ISL_693238 | Secao Centro de Diagnostico Secedi                      | Instituto Adolfo Lutz, Interdisciplinary Procedures Center, Strategic Laboratory | Claudio Tavares Sacchi et al |
| EPI_ISL_693239 | Secao Centro de Diagnostico Secedi                      | Instituto Adolfo Lutz, Interdisciplinary Procedures Center, Strategic Laboratory | Claudio Tavares Sacchi et al |
| EPI_ISL_693240 | Centro de Vigilância a Saude de Diadema                 | Instituto Adolfo Lutz, Interdisciplinary Procedures Center, Strategic Laboratory | Claudio Tavares Sacchi et al |
| EPI_ISL_693241 | Hospital e Maternidade Sao Lucas                        | Instituto Adolfo Lutz, Interdisciplinary Procedures Center, Strategic Laboratory | Claudio Tavares Sacchi et al |
| EPI_ISL_693242 | Centro de Vigilância a Saude de Diadema                 | Instituto Adolfo Lutz, Interdisciplinary Procedures Center, Strategic Laboratory | Claudio Tavares Sacchi et al |
| EPI_ISL_693247 | Secao Centro de Diagnostico Secedi                      | Instituto Adolfo Lutz, Interdisciplinary Procedures Center, Strategic Laboratory | Claudio Tavares Sacchi et al |
| EPI_ISL_693243 | Laboratório Municipal de Piracicaba                     | Instituto Adolfo Lutz, Interdisciplinary Procedures Center, Strategic Laboratory | Claudio Tavares Sacchi et al |
| EPI_ISL_693244 | Centro Médico da Polícia Militar do Estado de Sao Paulo | Instituto Adolfo Lutz, Interdisciplinary Procedures Center, Strategic Laboratory | Claudio Tavares Sacchi et al |
| EPI_ISL_693245 | UPA Santa Isabel                                        | Instituto Adolfo Lutz, Interdisciplinary Procedures Center, Strategic Laboratory | Claudio Tavares Sacchi et al |
| EPI_ISL_693246 | Laboratorio Municipal de Rio Grande da Serra            | Instituto Adolfo Lutz, Interdisciplinary Procedures Center, Strategic Laboratory | Claudio Tavares Sacchi et al |
| EPI_ISL_693248 | Centro Municipal de Epidemiologia e Imunizações         | Instituto Adolfo Lutz, Interdisciplinary Procedures Center, Strategic Laboratory | Claudio Tavares Sacchi et al |
| EPI_ISL_735398 | Laboratorio Fleury                                      | Instituto Adolfo Lutz, Interdisciplinary Procedures Center, Strategic Laboratory | Claudio Tavares Sacchi et al |
| EPI_ISL_735399 | Hospital Municiplal Dr Ignacio de gouvea                | Instituto Adolfo Lutz, Interdisciplinary Procedures Center, Strategic Laboratory | Claudio Tavares Sacchi et al |
| EPI_ISL_735400 | Instituto Adolfo Lutz - Regional de Santos              | Instituto Adolfo Lutz, Interdisciplinary Procedures Center, Strategic Laboratory | Claudio Tavares Sacchi et al |
| EPI_ISL_735401 | Instituto Adolfo Lutz - Regional de Rio Claro           | Instituto Adolfo Lutz, Interdisciplinary Procedures Center, Strategic Laboratory | Claudio Tavares Sacchi et al |
| EPI_ISL_735402 | Instituto Adolfo Lutz - Regional de Rio Claro           | Instituto Adolfo Lutz, Interdisciplinary Procedures Center, Strategic Laboratory | Claudio Tavares Sacchi et al |

|                |                                                        |                                                                                  |                              |
|----------------|--------------------------------------------------------|----------------------------------------------------------------------------------|------------------------------|
| EPI_ISL_735403 | Instituto Adolfo Lutz - Regional de Rio Claro          | Instituto Adolfo Lutz, Interdisciplinary Procedures Center, Strategic Laboratory | Claudio Tavares Sacchi et al |
| EPI_ISL_735404 | Instituto Adolfo Lutz - Regional de Rio Claro          | Instituto Adolfo Lutz, Interdisciplinary Procedures Center, Strategic Laboratory | Claudio Tavares Sacchi et al |
| EPI_ISL_735405 | Secretaria Municipal de Saude de Birigui               | Instituto Adolfo Lutz, Interdisciplinary Procedures Center, Strategic Laboratory | Claudio Tavares Sacchi et al |
| EPI_ISL_735406 | Unidade de Pronto Atendimento UPA I Sta Isabel         | Instituto Adolfo Lutz, Interdisciplinary Procedures Center, Strategic Laboratory | Claudio Tavares Sacchi et al |
| EPI_ISL_735407 | Santa Casa de Marilia                                  | Instituto Adolfo Lutz, Interdisciplinary Procedures Center, Strategic Laboratory | Claudio Tavares Sacchi et al |
| EPI_ISL_735408 | COVID 19 Centro de Combate ao Coronavirus CCC Jandira  | Instituto Adolfo Lutz, Interdisciplinary Procedures Center, Strategic Laboratory | Claudio Tavares Sacchi et al |
| EPI_ISL_735409 | Unidade de Pronto Atendimento Carlos Lourenco          | Instituto Adolfo Lutz, Interdisciplinary Procedures Center, Strategic Laboratory | Claudio Tavares Sacchi et al |
| EPI_ISL_735410 | Instituto Adolfo Lutz - Regional de Rio Claro          | Instituto Adolfo Lutz, Interdisciplinary Procedures Center, Strategic Laboratory | Claudio Tavares Sacchi et al |
| EPI_ISL_735411 | Centro de Vigilancia a Saude de Diadema                | Instituto Adolfo Lutz, Interdisciplinary Procedures Center, Strategic Laboratory | Claudio Tavares Sacchi et al |
| EPI_ISL_735412 | Hospital e Pronto Socorro Portinari                    | Instituto Adolfo Lutz, Interdisciplinary Procedures Center, Strategic Laboratory | Claudio Tavares Sacchi et al |
| EPI_ISL_735413 | Militello Centro de Diagnosticos e Biopesquisa Clinica | Instituto Adolfo Lutz, Interdisciplinary Procedures Center, Strategic Laboratory | Claudio Tavares Sacchi et al |
| EPI_ISL_735414 | Unidade de Pronto Atendimento de Agenor de Campos      | Instituto Adolfo Lutz, Interdisciplinary Procedures Center, Strategic Laboratory | Claudio Tavares Sacchi et al |
| EPI_ISL_735415 | Unidade de Pronto Atendimento de Agenor de Campos      | Instituto Adolfo Lutz, Interdisciplinary Procedures Center, Strategic Laboratory | Claudio Tavares Sacchi et al |
| EPI_ISL_735416 | Centro de Saude II Dr Jose Paione Mococa               | Instituto Adolfo Lutz, Interdisciplinary Procedures Center, Strategic Laboratory | Claudio Tavares Sacchi et al |
| EPI_ISL_735417 | Unidade de Pronto Atendimento de Agenor de Campos      | Instituto Adolfo Lutz, Interdisciplinary Procedures Center, Strategic Laboratory | Claudio Tavares Sacchi et al |
| EPI_ISL_735418 | Hospital Regional do Vale do Paraiba                   | Instituto Adolfo Lutz, Interdisciplinary Procedures Center, Strategic Laboratory | Claudio Tavares Sacchi et al |
| EPI_ISL_735419 | UBS Alvarenga                                          | Instituto Adolfo Lutz, Interdisciplinary Procedures Center, Strategic Laboratory | Claudio Tavares Sacchi et al |
| EPI_ISL_735420 | UBS Riacho Grande                                      | Instituto Adolfo Lutz, Interdisciplinary Procedures Center, Strategic Laboratory | Claudio Tavares Sacchi et al |
| EPI_ISL_735421 | UBS Sta Terezinha                                      | Instituto Adolfo Lutz, Interdisciplinary Procedures Center, Strategic Laboratory | Claudio Tavares Sacchi et al |
| EPI_ISL_735422 | UBS Dematchi                                           | Instituto Adolfo Lutz, Interdisciplinary Procedures Center, Strategic Laboratory | Claudio Tavares Sacchi et al |
| EPI_ISL_776764 | Instituto Adolfo Lutz - Regional de Santo Andre        | Instituto Adolfo Lutz, Interdisciplinary Procedures Center, Strategic Laboratory | Claudio Tavares Sacchi et al |
| EPI_ISL_776765 | Instituto Adolfo Lutz - Regional de Santo Andre        | Instituto Adolfo Lutz, Interdisciplinary Procedures Center, Strategic Laboratory | Claudio Tavares Sacchi et al |
| EPI_ISL_792115 | Instituto Adolfo Lutz - Regional de Taubate            | Instituto Adolfo Lutz, Interdisciplinary Procedures Center, Strategic Laboratory | Claudio Tavares Sacchi et al |
| EPI_ISL_792116 | Instituto Adolfo Lutz - Regional de Taubate            | Instituto Adolfo Lutz, Interdisciplinary Procedures Center, Strategic Laboratory | Claudio Tavares Sacchi et al |
| EPI_ISL_861665 | Instituto Adolfo Lutz - Regional de Taubate            | Instituto Adolfo Lutz, Interdisciplinary Procedures Center, Strategic Laboratory | Claudio Tavares Sacchi et al |
| EPI_ISL_735423 | Centro de Vigilancia a Saude de Diadema                | Instituto Adolfo Lutz, Interdisciplinary Procedures Center, Strategic Laboratory | Claudio Tavares Sacchi et al |



|                |                                               |                                                                                  |                              |
|----------------|-----------------------------------------------|----------------------------------------------------------------------------------|------------------------------|
| EPI_ISL_735424 | Centro de Vigilancia a Saude de Diadema       | Instituto Adolfo Lutz, Interdisciplinary Procedures Center, Strategic Laboratory | Claudio Tavares Sacchi et al |
| EPI_ISL_735425 | Hospital e Maternidade Sao Lucas              | Instituto Adolfo Lutz, Interdisciplinary Procedures Center, Strategic Laboratory | Claudio Tavares Sacchi et al |
| EPI_ISL_735426 | Centro de Vigilancia a Saude de Diadema       | Instituto Adolfo Lutz, Interdisciplinary Procedures Center, Strategic Laboratory | Claudio Tavares Sacchi et al |
| EPI_ISL_735427 | Instituto Adolfo Lutz - Regional de Santos    | Instituto Adolfo Lutz, Interdisciplinary Procedures Center, Strategic Laboratory | Claudio Tavares Sacchi et al |
| EPI_ISL_735428 | Hospital Nipo Brasileiro                      | Instituto Adolfo Lutz, Interdisciplinary Procedures Center, Strategic Laboratory | Claudio Tavares Sacchi et al |
| EPI_ISL_735429 | Hospital Nipo Brasileiro                      | Instituto Adolfo Lutz, Interdisciplinary Procedures Center, Strategic Laboratory | Claudio Tavares Sacchi et al |
| EPI_ISL_735430 | Instituto Adolfo Lutz - Regional de Santos    | Instituto Adolfo Lutz, Interdisciplinary Procedures Center, Strategic Laboratory | Claudio Tavares Sacchi et al |
| EPI_ISL_735431 | Hospital Nipo Brasileiro                      | Instituto Adolfo Lutz, Interdisciplinary Procedures Center, Strategic Laboratory | Claudio Tavares Sacchi et al |
| EPI_ISL_735432 | Hospital Nipo Brasileiro                      | Instituto Adolfo Lutz, Interdisciplinary Procedures Center, Strategic Laboratory | Claudio Tavares Sacchi et al |
| EPI_ISL_735433 | Posto de Atendimento Saude Cidade Pasc Cajati | Instituto Adolfo Lutz, Interdisciplinary Procedures Center, Strategic Laboratory | Claudio Tavares Sacchi et al |
| EPI_ISL_940608 | Laboratório Sao Lucas                         | Instituto Adolfo Lutz, Interdisciplinary Procedures Center, Strategic Laboratory | Claudio Tavares Sacchi et al |
| EPI_ISL_833156 | Instituto Adolfo Lutz - Regional de Sorocaba  | Instituto Adolfo Lutz, Interdisciplinary Procedures Center, Strategic Laboratory | Claudio Tavares Sacchi et al |
| EPI_ISL_861666 | PSF Dr. Antonio Pires de Almeida              | Instituto Adolfo Lutz, Interdisciplinary Procedures Center, Strategic Laboratory | Claudio Tavares Sacchi et al |
| EPI_ISL_861667 | Instituto Adolfo Lutz - Regional de Rio Claro | Instituto Adolfo Lutz, Interdisciplinary Procedures Center, Strategic Laboratory | Claudio Tavares Sacchi et al |
| EPI_ISL_833152 | Instituto Adolfo Lutz - Central               | Instituto Adolfo Lutz, Interdisciplinary Procedures Center, Strategic Laboratory | Claudio Tavares Sacchi et al |
| EPI_ISL_861625 | Instituto Adolfo Lutz - Central               | Instituto Adolfo Lutz, Interdisciplinary Procedures Center, Strategic Laboratory | Claudio Tavares Sacchi et al |
| EPI_ISL_861626 | Instituto Adolfo Lutz - Central               | Instituto Adolfo Lutz, Interdisciplinary Procedures Center, Strategic Laboratory | Claudio Tavares Sacchi et al |
| EPI_ISL_861627 | Instituto Adolfo Lutz - Central               | Instituto Adolfo Lutz, Interdisciplinary Procedures Center, Strategic Laboratory | Claudio Tavares Sacchi et al |
| EPI_ISL_861628 | Laboratorio Municipal de Guarulhos            | Instituto Adolfo Lutz, Interdisciplinary Procedures Center, Strategic Laboratory | Claudio Tavares Sacchi et al |
| EPI_ISL_861629 | Instituto Adolfo Lutz - Central               | Instituto Adolfo Lutz, Interdisciplinary Procedures Center, Strategic Laboratory | Claudio Tavares Sacchi et al |
| EPI_ISL_776750 | Instituto Adolfo Lutz - Central               | Instituto Adolfo Lutz, Interdisciplinary Procedures Center, Strategic Laboratory | Claudio Tavares Sacchi et al |
| EPI_ISL_776751 | Instituto Adolfo Lutz - Central               | Instituto Adolfo Lutz, Interdisciplinary Procedures Center, Strategic Laboratory | Claudio Tavares Sacchi et al |
| EPI_ISL_776752 | Instituto Adolfo Lutz - Central               | Instituto Adolfo Lutz, Interdisciplinary Procedures Center, Strategic Laboratory | Claudio Tavares Sacchi et al |
| EPI_ISL_776753 | Instituto Adolfo Lutz - Central               | Instituto Adolfo Lutz, Interdisciplinary Procedures Center, Strategic Laboratory | Claudio Tavares Sacchi et al |
| EPI_ISL_776754 | Instituto Adolfo Lutz - Central               | Instituto Adolfo Lutz, Interdisciplinary Procedures Center, Strategic Laboratory | Claudio Tavares Sacchi et al |
| EPI_ISL_776755 | Instituto Adolfo Lutz - Central               | Instituto Adolfo Lutz, Interdisciplinary Procedures Center, Strategic Laboratory | Claudio Tavares Sacchi et al |



|                |                                                 |                                                                                  |                              |
|----------------|-------------------------------------------------|----------------------------------------------------------------------------------|------------------------------|
| EPI_ISL_792103 | Instituto Adolfo Lutz - Regional de Santo Andre | Instituto Adolfo Lutz, Interdisciplinary Procedures Center, Strategic Laboratory | Claudio Tavares Sacchi et al |
| EPI_ISL_792104 | Instituto Adolfo Lutz - Central                 | Instituto Adolfo Lutz, Interdisciplinary Procedures Center, Strategic Laboratory | Claudio Tavares Sacchi et al |
| EPI_ISL_792105 | Instituto Adolfo Lutz - Central                 | Instituto Adolfo Lutz, Interdisciplinary Procedures Center, Strategic Laboratory | Claudio Tavares Sacchi et al |
| EPI_ISL_861630 | Instituto Adolfo Lutz - Central                 | Instituto Adolfo Lutz, Interdisciplinary Procedures Center, Strategic Laboratory | Claudio Tavares Sacchi et al |
| EPI_ISL_861633 | Instituto Adolfo Lutz - Central                 | Instituto Adolfo Lutz, Interdisciplinary Procedures Center, Strategic Laboratory | Claudio Tavares Sacchi et al |
| EPI_ISL_861634 | Instituto Adolfo Lutz - Central                 | Instituto Adolfo Lutz, Interdisciplinary Procedures Center, Strategic Laboratory | Claudio Tavares Sacchi et al |
| EPI_ISL_833153 | Instituto Adolfo Lutz - Central                 | Instituto Adolfo Lutz, Interdisciplinary Procedures Center, Strategic Laboratory | Claudio Tavares Sacchi et al |
| EPI_ISL_861635 | Hospital e Maternidade Madre Theodora           | Instituto Adolfo Lutz, Interdisciplinary Procedures Center, Strategic Laboratory | Claudio Tavares Sacchi et al |
| EPI_ISL_861636 | Hospital Geral de Sao Mateus São Paulo          | Instituto Adolfo Lutz, Interdisciplinary Procedures Center, Strategic Laboratory | Claudio Tavares Sacchi et al |
| EPI_ISL_861638 | Hospital Municipal Dr. Moyses Deutsch           | Instituto Adolfo Lutz, Interdisciplinary Procedures Center, Strategic Laboratory | Claudio Tavares Sacchi et al |
| EPI_ISL_861639 | Hospital Sao Paulo de Ensino da Unifesp         | Instituto Adolfo Lutz, Interdisciplinary Procedures Center, Strategic Laboratory | Claudio Tavares Sacchi et al |
| EPI_ISL_906067 | PS e Maternidade Nair Fonseca Leitao Arantes    | Instituto Adolfo Lutz, Interdisciplinary Procedures Center, Strategic Laboratory | Claudio Tavares Sacchi et al |
| EPI_ISL_861637 | Hospital Nipo Brasileiro                        | Instituto Adolfo Lutz, Interdisciplinary Procedures Center, Strategic Laboratory | Claudio Tavares Sacchi et al |
| EPI_ISL_906066 | Hospital Nipo Brasileiro                        | Instituto Adolfo Lutz, Interdisciplinary Procedures Center, Strategic Laboratory | Claudio Tavares Sacchi et al |
| EPI_ISL_861640 | Hospital Municipal Dr. Moyses Deutsch           | Instituto Adolfo Lutz, Interdisciplinary Procedures Center, Strategic Laboratory | Claudio Tavares Sacchi et al |
| EPI_ISL_861641 | Hospital Municipal Dr. Moyses Deutsch           | Instituto Adolfo Lutz, Interdisciplinary Procedures Center, Strategic Laboratory | Claudio Tavares Sacchi et al |
| EPI_ISL_776766 | Instituto Adolfo Lutz - Regional de Santo Andre | Instituto Adolfo Lutz, Interdisciplinary Procedures Center, Strategic Laboratory | Claudio Tavares Sacchi et al |
| EPI_ISL_776767 | Instituto Adolfo Lutz - Regional de Marília     | Instituto Adolfo Lutz, Interdisciplinary Procedures Center, Strategic Laboratory | Claudio Tavares Sacchi et al |
| EPI_ISL_776768 | Instituto Adolfo Lutz - Regional de Aracatuba   | Instituto Adolfo Lutz, Interdisciplinary Procedures Center, Strategic Laboratory | Claudio Tavares Sacchi et al |
| EPI_ISL_776769 | Instituto Adolfo Lutz - Regional de Santo Andre | Instituto Adolfo Lutz, Interdisciplinary Procedures Center, Strategic Laboratory | Claudio Tavares Sacchi et al |
| EPI_ISL_755640 | Instituto Adolfo Lutz - Central                 | Instituto Adolfo Lutz, Interdisciplinary Procedures Center, Strategic Laboratory | Claudio Tavares Sacchi et al |
| EPI_ISL_755641 | Instituto Adolfo Lutz - Regional de Santo Andre | Instituto Adolfo Lutz, Interdisciplinary Procedures Center, Strategic Laboratory | Claudio Tavares Sacchi et al |
| EPI_ISL_755642 | Instituto Adolfo Lutz - Central                 | Instituto Adolfo Lutz, Interdisciplinary Procedures Center, Strategic Laboratory | Claudio Tavares Sacchi et al |
| EPI_ISL_755643 | Instituto Adolfo Lutz - Central                 | Instituto Adolfo Lutz, Interdisciplinary Procedures Center, Strategic Laboratory | Claudio Tavares Sacchi et al |
| EPI_ISL_755644 | Lab LOC - Itapeperica da Serra                  | Instituto Adolfo Lutz, Interdisciplinary Procedures Center, Strategic Laboratory | Claudio Tavares Sacchi et al |
| EPI_ISL_755645 | Lab LOC - Itapeperica da Serra                  | Instituto Adolfo Lutz, Interdisciplinary Procedures Center, Strategic Laboratory | Claudio Tavares Sacchi et al |

|                |                                                   |                                                                                  |                              |
|----------------|---------------------------------------------------|----------------------------------------------------------------------------------|------------------------------|
| EPI_ISL_755646 | Instituto Adolfo Lutz - Regional de Santo Andre   | Instituto Adolfo Lutz, Interdisciplinary Procedures Center, Strategic Laboratory | Claudio Tavares Sacchi et al |
| EPI_ISL_755647 | Instituto Adolfo Lutz - Regional de Santo Andre   | Instituto Adolfo Lutz, Interdisciplinary Procedures Center, Strategic Laboratory | Claudio Tavares Sacchi et al |
| EPI_ISL_755648 | Instituto Adolfo Lutz - Regional de Taubate       | Instituto Adolfo Lutz, Interdisciplinary Procedures Center, Strategic Laboratory | Claudio Tavares Sacchi et al |
| EPI_ISL_755649 | Instituto Adolfo Lutz - Regional de Santo Andre   | Instituto Adolfo Lutz, Interdisciplinary Procedures Center, Strategic Laboratory | Claudio Tavares Sacchi et al |
| EPI_ISL_755650 | Instituto Adolfo Lutz - Regional de Taubate       | Instituto Adolfo Lutz, Interdisciplinary Procedures Center, Strategic Laboratory | Claudio Tavares Sacchi et al |
| EPI_ISL_755651 | Instituto Adolfo Lutz - Central                   | Instituto Adolfo Lutz, Interdisciplinary Procedures Center, Strategic Laboratory | Claudio Tavares Sacchi et al |
| EPI_ISL_755652 | Lab LOC - Itapecerica da Serra                    | Instituto Adolfo Lutz, Interdisciplinary Procedures Center, Strategic Laboratory | Claudio Tavares Sacchi et al |
| EPI_ISL_755653 | Instituto Adolfo Lutz - Central                   | Instituto Adolfo Lutz, Interdisciplinary Procedures Center, Strategic Laboratory | Claudio Tavares Sacchi et al |
| EPI_ISL_755654 | Instituto Adolfo Lutz - Central                   | Instituto Adolfo Lutz, Interdisciplinary Procedures Center, Strategic Laboratory | Claudio Tavares Sacchi et al |
| EPI_ISL_755655 | Instituto Adolfo Lutz - Regional de Campinas      | Instituto Adolfo Lutz, Interdisciplinary Procedures Center, Strategic Laboratory | Claudio Tavares Sacchi et al |
| EPI_ISL_861674 | UPA Central de Caraguatatuba                      | Instituto Adolfo Lutz, Interdisciplinary Procedures Center, Strategic Laboratory | Claudio Tavares Sacchi et al |
| EPI_ISL_861675 | UPA Central de Caraguatatuba                      | Instituto Adolfo Lutz, Interdisciplinary Procedures Center, Strategic Laboratory | Claudio Tavares Sacchi et al |
| EPI_ISL_763074 | Diagnosticos da America - DASA                    | Instituto Adolfo Lutz, Interdisciplinary Procedures Center, Strategic Laboratory | Claudio Tavares Sacchi et al |
| EPI_ISL_763075 | Diagnosticos da America - DASA                    | Instituto Adolfo Lutz, Interdisciplinary Procedures Center, Strategic Laboratory | Claudio Tavares Sacchi et al |
| EPI_ISL_861668 | Centro de Triagem Covid19                         | Instituto Adolfo Lutz, Interdisciplinary Procedures Center, Strategic Laboratory | Claudio Tavares Sacchi et al |
| EPI_ISL_833157 | Instituto Adolfo Lutz - Regional de Santo Andre   | Instituto Adolfo Lutz, Interdisciplinary Procedures Center, Strategic Laboratory | Claudio Tavares Sacchi et al |
| EPI_ISL_833158 | Instituto Adolfo Lutz - Regional de Santo Andre   | Instituto Adolfo Lutz, Interdisciplinary Procedures Center, Strategic Laboratory | Claudio Tavares Sacchi et al |
| EPI_ISL_836143 | Hospital de Campanha COVID-19 de Mairipora        | Instituto Adolfo Lutz, Interdisciplinary Procedures Center, Strategic Laboratory | Claudio Tavares Sacchi et al |
| EPI_ISL_861669 | Lab LOC - Itapecerica da Serra                    | Instituto Adolfo Lutz, Interdisciplinary Procedures Center, Strategic Laboratory | Claudio Tavares Sacchi et al |
| EPI_ISL_861670 | Instituto Adolfo Lutz - Regional de Taubate       | Instituto Adolfo Lutz, Interdisciplinary Procedures Center, Strategic Laboratory | Claudio Tavares Sacchi et al |
| EPI_ISL_836977 | Hospital Municiplal Dr. Jose de Carvalho Florence | Instituto Adolfo Lutz, Interdisciplinary Procedures Center, Strategic Laboratory | Claudio Tavares Sacchi et al |
| EPI_ISL_836978 | Irmandade da Santa Casa de Misericordia de Lorena | Instituto Adolfo Lutz, Interdisciplinary Procedures Center, Strategic Laboratory | Claudio Tavares Sacchi et al |
| EPI_ISL_837053 | UBS Darcy Alves e Robalinho                       | Instituto Adolfo Lutz, Interdisciplinary Procedures Center, Strategic Laboratory | Claudio Tavares Sacchi et al |
| EPI_ISL_837054 | UBS Jose Sabino Ferreira                          | Instituto Adolfo Lutz, Interdisciplinary Procedures Center, Strategic Laboratory | Claudio Tavares Sacchi et al |
| EPI_ISL_833159 | Instituto Adolfo Lutz - Central                   | Instituto Adolfo Lutz, Interdisciplinary Procedures Center, Strategic Laboratory | Claudio Tavares Sacchi et al |
| EPI_ISL_833160 | Instituto Adolfo Lutz - Regional de Santo Andre   | Instituto Adolfo Lutz, Interdisciplinary Procedures Center, Strategic Laboratory | Claudio Tavares Sacchi et al |

|                |                                                        |                                                                                  |                              |
|----------------|--------------------------------------------------------|----------------------------------------------------------------------------------|------------------------------|
| EPI_ISL_833161 | Instituto Adolfo Lutz - Central                        | Instituto Adolfo Lutz, Interdisciplinary Procedures Center, Strategic Laboratory | Claudio Tavares Sacchi et al |
| EPI_ISL_833162 | Lab LOC - Itapecerica da Serra                         | Instituto Adolfo Lutz, Interdisciplinary Procedures Center, Strategic Laboratory | Claudio Tavares Sacchi et al |
| EPI_ISL_833163 | Instituto Adolfo Lutz - Regional de Marilia            | Instituto Adolfo Lutz, Interdisciplinary Procedures Center, Strategic Laboratory | Claudio Tavares Sacchi et al |
| EPI_ISL_833164 | Secretaria Municipal de Saude de Santa Barbara d'oeste | Instituto Adolfo Lutz, Interdisciplinary Procedures Center, Strategic Laboratory | Claudio Tavares Sacchi et al |
| EPI_ISL_882658 | Secretaria Municipal de Saude                          | Instituto Adolfo Lutz, Interdisciplinary Procedures Center, Strategic Laboratory | Claudio Tavares Sacchi et al |
| EPI_ISL_882659 | Centro de Triagem Covid19                              | Instituto Adolfo Lutz, Interdisciplinary Procedures Center, Strategic Laboratory | Claudio Tavares Sacchi et al |
| EPI_ISL_882660 | Hospital Municipal Prefeito Waldemar Costa Filho       | Instituto Adolfo Lutz, Interdisciplinary Procedures Center, Strategic Laboratory | Claudio Tavares Sacchi et al |
| EPI_ISL_861671 | Hospital Municipal Prefeito Waldemar Costa Filho       | Instituto Adolfo Lutz, Interdisciplinary Procedures Center, Strategic Laboratory | Claudio Tavares Sacchi et al |
| EPI_ISL_861672 | Day Hospital de Ermelino Matarazzo                     | Instituto Adolfo Lutz, Interdisciplinary Procedures Center, Strategic Laboratory | Claudio Tavares Sacchi et al |
| EPI_ISL_861673 | PA Novo Osasco                                         | Instituto Adolfo Lutz, Interdisciplinary Procedures Center, Strategic Laboratory | Claudio Tavares Sacchi et al |
| EPI_ISL_906065 | Day Hospital de Ermelino Matarazzo                     | Instituto Adolfo Lutz, Interdisciplinary Procedures Center, Strategic Laboratory | Claudio Tavares Sacchi et al |
| EPI_ISL_861632 | Instituto Adolfo Lutz - Central                        | Instituto Adolfo Lutz, Interdisciplinary Procedures Center, Strategic Laboratory | Claudio Tavares Sacchi et al |
| EPI_ISL_861644 | Hospital Santa Virginia                                | Instituto Adolfo Lutz, Interdisciplinary Procedures Center, Strategic Laboratory | Claudio Tavares Sacchi et al |
| EPI_ISL_861645 | Hospital e Pronto Socorro Comunitario Vila Iolanda     | Instituto Adolfo Lutz, Interdisciplinary Procedures Center, Strategic Laboratory | Claudio Tavares Sacchi et al |
| EPI_ISL_861646 | Hospital Santa Marcelina Sao Paulo                     | Instituto Adolfo Lutz, Interdisciplinary Procedures Center, Strategic Laboratory | Claudio Tavares Sacchi et al |
| EPI_ISL_861647 | Hospital Santa Marcelina Sao Paulo                     | Instituto Adolfo Lutz, Interdisciplinary Procedures Center, Strategic Laboratory | Claudio Tavares Sacchi et al |
| EPI_ISL_861648 | Hospital e Pronto Socorro Portinari                    | Instituto Adolfo Lutz, Interdisciplinary Procedures Center, Strategic Laboratory | Claudio Tavares Sacchi et al |
| EPI_ISL_861649 | Hospital Renascença Campinas                           | Instituto Adolfo Lutz, Interdisciplinary Procedures Center, Strategic Laboratory | Claudio Tavares Sacchi et al |
| EPI_ISL_861650 | Hospital Santa Marcelina Sao Paulo                     | Instituto Adolfo Lutz, Interdisciplinary Procedures Center, Strategic Laboratory | Claudio Tavares Sacchi et al |
| EPI_ISL_861651 | AMA Jardim Brasil                                      | Instituto Adolfo Lutz, Interdisciplinary Procedures Center, Strategic Laboratory | Claudio Tavares Sacchi et al |
| EPI_ISL_861652 | AMA Wamberto Dias da Costa                             | Instituto Adolfo Lutz, Interdisciplinary Procedures Center, Strategic Laboratory | Claudio Tavares Sacchi et al |
| EPI_ISL_861653 | Hospital Santa Virginia                                | Instituto Adolfo Lutz, Interdisciplinary Procedures Center, Strategic Laboratory | Claudio Tavares Sacchi et al |
| EPI_ISL_861654 | Hospital Santa Marcelina Sao Paulo                     | Instituto Adolfo Lutz, Interdisciplinary Procedures Center, Strategic Laboratory | Claudio Tavares Sacchi et al |
| EPI_ISL_861655 | Hospital Santa Marcelina Sao Paulo                     | Instituto Adolfo Lutz, Interdisciplinary Procedures Center, Strategic Laboratory | Claudio Tavares Sacchi et al |
| EPI_ISL_861656 | UPA de Jandira                                         | Instituto Adolfo Lutz, Interdisciplinary Procedures Center, Strategic Laboratory | Claudio Tavares Sacchi et al |
| EPI_ISL_861657 | Hospital e Maternidade Sino Brasileiro                 | Instituto Adolfo Lutz, Interdisciplinary Procedures Center, Strategic Laboratory | Claudio Tavares Sacchi et al |

|                 |                                                   |                                                                                  |                              |
|-----------------|---------------------------------------------------|----------------------------------------------------------------------------------|------------------------------|
| EPI_ISL_861658  | Hospital Municipal Antônio Giglio                 | Instituto Adolfo Lutz, Interdisciplinary Procedures Center, Strategic Laboratory | Claudio Tavares Sacchi et al |
| EPI_ISL_861659  | PS e Maternidade Nair Fonseca Leitao Arantes      | Instituto Adolfo Lutz, Interdisciplinary Procedures Center, Strategic Laboratory | Claudio Tavares Sacchi et al |
| EPI_ISL_861660  | PS e Maternidade Nair Fonseca Leitao Arantes      | Instituto Adolfo Lutz, Interdisciplinary Procedures Center, Strategic Laboratory | Claudio Tavares Sacchi et al |
| EPI_ISL_861661  | PS e Maternidade Nair Fonseca Leitao Arantes      | Instituto Adolfo Lutz, Interdisciplinary Procedures Center, Strategic Laboratory | Claudio Tavares Sacchi et al |
| EPI_ISL_861662  | CS I Tacito Leite de Carvalho e Silva             | Instituto Adolfo Lutz, Interdisciplinary Procedures Center, Strategic Laboratory | Claudio Tavares Sacchi et al |
| EPI_ISL_861663  | Instituto Adolfo Lutz - Central                   | Instituto Adolfo Lutz, Interdisciplinary Procedures Center, Strategic Laboratory | Claudio Tavares Sacchi et al |
| EPI_ISL_861664  | Instituto Adolfo Lutz - Regional de Campinas      | Instituto Adolfo Lutz, Interdisciplinary Procedures Center, Strategic Laboratory | Claudio Tavares Sacchi et al |
| EPI_ISL_833165  | Hospital Samaritano                               | Instituto Adolfo Lutz, Interdisciplinary Procedures Center, Strategic Laboratory | Claudio Tavares Sacchi et al |
| EPI_ISL_833166  | Hospital Samaritano                               | Instituto Adolfo Lutz, Interdisciplinary Procedures Center, Strategic Laboratory | Claudio Tavares Sacchi et al |
| EPI_ISL_860317  | Instituto Adolfo Lutz - Regional de Sorocaba      | Instituto Adolfo Lutz, Interdisciplinary Procedures Center, Strategic Laboratory | Claudio Tavares Sacchi et al |
| EPI_ISL_860633  | Instituto Adolfo Lutz - Regional de Sorocaba      | Instituto Adolfo Lutz, Interdisciplinary Procedures Center, Strategic Laboratory | Claudio Tavares Sacchi et al |
| EPI_ISL_861676  | UPA Vila Santa Catarina                           | Instituto Adolfo Lutz, Interdisciplinary Procedures Center, Strategic Laboratory | Claudio Tavares Sacchi et al |
| EPI_ISL_861677  | Instituto Adolfo Lutz - Central                   | Instituto Adolfo Lutz, Interdisciplinary Procedures Center, Strategic Laboratory | Claudio Tavares Sacchi et al |
| EPI_ISL_861678  | Laboratorio Municipal de Guarulhos                | Instituto Adolfo Lutz, Interdisciplinary Procedures Center, Strategic Laboratory | Claudio Tavares Sacchi et al |
| EPI_ISL_861679  | Instituto Adolfo Lutz - Regional de Taubate       | Instituto Adolfo Lutz, Interdisciplinary Procedures Center, Strategic Laboratory | Claudio Tavares Sacchi et al |
| EPI_ISL_875688  | National Influenza Center - Instituto Adolfo Lutz | Instituto Adolfo Lutz, Interdisciplinary Procedures Center, Strategic Laboratory | Claudio Tavares Sacchi et al |
| EPI_ISL_1000675 | Instituto de Biotecnologia - UNESP-Botucatu-SP    | Instituto de Biotecnologia - UNESP-Botucatu-SP                                   | Leila Sabrina Ullmann et al  |
| EPI_ISL_1000673 | Instituto de Biotecnologia - UNESP-Botucatu-SP    | Instituto de Biotecnologia - UNESP-Botucatu-SP                                   | Leila Sabrina Ullmann et al  |
| EPI_ISL_1000677 | Instituto de Biotecnologia - UNESP-Botucatu-SP    | Instituto de Biotecnologia - UNESP-Botucatu-SP                                   | Leila Sabrina Ullmann et al  |
| EPI_ISL_1000671 | Instituto de Biotecnologia - UNESP-Botucatu-SP    | Instituto de Biotecnologia - UNESP-Botucatu-SP                                   | Leila Sabrina Ullmann et al  |
| EPI_ISL_875548  | Instituto de Biotecnologia - UNESP-Botucatu-SP    | Instituto de Biotecnologia - UNESP-Botucatu-SP                                   | Leila Sabrina Ullmann et al  |
| EPI_ISL_875550  | Instituto de Biotecnologia - UNESP-Botucatu-SP    | Instituto de Biotecnologia - UNESP-Botucatu-SP                                   | Leila Sabrina Ullmann et al  |
| EPI_ISL_888671  | Instituto de Biotecnologia - UNESP-Botucatu-SP    | Instituto de Biotecnologia - UNESP-Botucatu-SP                                   | Leila Sabrina Ullmann et al  |
| EPI_ISL_875544  | Instituto de Biotecnologia - UNESP-Botucatu-SP    | Instituto de Biotecnologia - UNESP-Botucatu-SP                                   | Leila Sabrina Ullmann et al  |
| EPI_ISL_875541  | Instituto de Biotecnologia - UNESP-Botucatu-SP    | Instituto de Biotecnologia - UNESP-Botucatu-SP                                   | Leila Sabrina Ullmann et al  |
| EPI_ISL_875545  | Instituto de Biotecnologia - UNESP-Botucatu-SP    | Instituto de Biotecnologia - UNESP-Botucatu-SP                                   | Leila Sabrina Ullmann et al  |
| EPI_ISL_875543  | Instituto de Biotecnologia - UNESP-Botucatu-SP    | Instituto de Biotecnologia - UNESP-Botucatu-SP                                   | Leila Sabrina Ullmann et al  |
| EPI_ISL_875549  | Instituto de Biotecnologia - UNESP-Botucatu-SP    | Instituto de Biotecnologia - UNESP-Botucatu-SP                                   | Leila Sabrina Ullmann et al  |
| EPI_ISL_875546  | Instituto de Biotecnologia - UNESP-Botucatu-SP    | Instituto de Biotecnologia - UNESP-Botucatu-SP                                   | Leila Sabrina Ullmann et al  |
| EPI_ISL_875542  | Instituto de Biotecnologia - UNESP-Botucatu-SP    | Instituto de Biotecnologia - UNESP-Botucatu-SP                                   | Leila Sabrina Ullmann et al  |
| EPI_ISL_875540  | Instituto de Biotecnologia - UNESP-Botucatu-SP    | Instituto de Biotecnologia - UNESP-Botucatu-SP                                   | Leila Sabrina Ullmann et al  |































|                |                                                                                                                                 |                                                                                                                                 |                              |
|----------------|---------------------------------------------------------------------------------------------------------------------------------|---------------------------------------------------------------------------------------------------------------------------------|------------------------------|
| EPI_ISL_613707 | Laboratory of Molecular Biology, Blood Center of Ribeirão Preto                                                                 | Laboratory of Molecular Biology, Blood Center of Ribeirão Preto, Faculty of Medicine of Ribeirão Preto, University of São Paulo | Svetoslav N Slavov et al     |
| EPI_ISL_613951 | Laboratory of Molecular Biology, Blood Center of Ribeirão Preto, Faculty of Medicine of Ribeirão Preto, University of São Paulo | Laboratory of Molecular Biology, Blood Center of Ribeirão Preto, Faculty of Medicine of Ribeirão Preto, University of São Paulo | Svetoslav N Slavov et al     |
| EPI_ISL_943973 | LACEN do Estado de Tocantins                                                                                                    | Instituto Adolfo Lutz, Interdisciplinary Procedures Center, Strategic Laboratory                                                | Claudio Tavares Sacchi et al |
| EPI_ISL_943974 | LACEN do Estado de Tocantins                                                                                                    | Instituto Adolfo Lutz, Interdisciplinary Procedures Center, Strategic Laboratory                                                | Claudio Tavares Sacchi et al |
| EPI_ISL_943975 | LACEN do Estado de Tocantins                                                                                                    | Instituto Adolfo Lutz, Interdisciplinary Procedures Center, Strategic Laboratory                                                | Claudio Tavares Sacchi et al |
| EPI_ISL_943976 | LACEN do Estado de Tocantins                                                                                                    | Instituto Adolfo Lutz, Interdisciplinary Procedures Center, Strategic Laboratory                                                | Claudio Tavares Sacchi et al |
| EPI_ISL_943977 | LACEN do Estado de Tocantins                                                                                                    | Instituto Adolfo Lutz, Interdisciplinary Procedures Center, Strategic Laboratory                                                | Claudio Tavares Sacchi et al |
| EPI_ISL_943978 | LACEN do Estado de Tocantins                                                                                                    | Instituto Adolfo Lutz, Interdisciplinary Procedures Center, Strategic Laboratory                                                | Claudio Tavares Sacchi et al |
| EPI_ISL_943979 | LACEN do Estado de Tocantins                                                                                                    | Instituto Adolfo Lutz, Interdisciplinary Procedures Center, Strategic Laboratory                                                | Claudio Tavares Sacchi et al |
| EPI_ISL_943980 | LACEN do Estado de Tocantins                                                                                                    | Instituto Adolfo Lutz, Interdisciplinary Procedures Center, Strategic Laboratory                                                | Claudio Tavares Sacchi et al |
| EPI_ISL_943981 | LACEN do Estado de Tocantins                                                                                                    | Instituto Adolfo Lutz, Interdisciplinary Procedures Center, Strategic Laboratory                                                | Claudio Tavares Sacchi et al |
| EPI_ISL_943982 | LACEN do Estado de Tocantins                                                                                                    | Instituto Adolfo Lutz, Interdisciplinary Procedures Center, Strategic Laboratory                                                | Claudio Tavares Sacchi et al |
| EPI_ISL_943983 | LACEN do Estado de Tocantins                                                                                                    | Instituto Adolfo Lutz, Interdisciplinary Procedures Center, Strategic Laboratory                                                | Claudio Tavares Sacchi et al |
| EPI_ISL_943991 | LACEN do Estado de Tocantins                                                                                                    | Instituto Adolfo Lutz, Interdisciplinary Procedures Center, Strategic Laboratory                                                | Claudio Tavares Sacchi et al |
| EPI_ISL_943985 | LACEN do Estado de Tocantins                                                                                                    | Instituto Adolfo Lutz, Interdisciplinary Procedures Center, Strategic Laboratory                                                | Claudio Tavares Sacchi et al |
| EPI_ISL_943986 | LACEN do Estado de Tocantins                                                                                                    | Instituto Adolfo Lutz, Interdisciplinary Procedures Center, Strategic Laboratory                                                | Claudio Tavares Sacchi et al |
| EPI_ISL_486427 | unknown                                                                                                                         | Clinical Laboratory, Hospital Israelita Albert Einstein                                                                         | Amgartebe et al              |
| EPI_ISL_486429 | unknown                                                                                                                         | Clinical Laboratory, Hospital Israelita Albert Einstein                                                                         | Malta et al                  |
| EPI_ISL_450506 | Clinical Laboratory, Hospital Israelita Albert Einstein                                                                         | Clinical Laboratory, Hospital Israelita Albert Einstein                                                                         | Malta et al                  |
| EPI_ISL_443187 | National Virology Reference Laboratory                                                                                          | National Public Health Laboratory, National Centre for Infectious Diseases                                                      | Mak Tze Minn et al           |
| EPI_ISL_435674 | National Virology Reference Laboratory                                                                                          | National Public Health Laboratory, National Centre for Infectious Diseases                                                      | Mak Tze Minn et al           |
| EPI_ISL_435675 | National Virology Reference Laboratory                                                                                          | National Public Health Laboratory, National Centre for Infectious Diseases                                                      | Mak Tze Minn et al           |
| EPI_ISL_435676 | National Virology Reference Laboratory                                                                                          | National Public Health Laboratory, National Centre for Infectious Diseases                                                      | Mak Tze Minn et al           |
| EPI_ISL_435677 | National Virology Reference Laboratory                                                                                          | National Public Health Laboratory, National Centre for Infectious Diseases                                                      | Mak Tze Minn et al           |
| EPI_ISL_962877 | National Virology Reference Laboratory                                                                                          | National Public Health Laboratory, National Centre for Infectious Diseases                                                      | Tze Minn Mak et al           |
| EPI_ISL_962878 | National Virology Reference Laboratory                                                                                          | National Public Health Laboratory, National Centre for Infectious Diseases                                                      | Tze Minn Mak et al           |
| EPI_ISL_480297 | National Reference Laboratory "Influenza and acute respiratory diseases"                                                        | NRL-HIV                                                                                                                         | Ivan Ivanov et al            |
| EPI_ISL_480224 | National Reference Laboratory "Influenza and acute respiratory diseases"                                                        | NRL-HIV                                                                                                                         | Ivan Ivanov et al            |
| EPI_ISL_480298 | National Reference Laboratory "Influenza and acute respiratory diseases"                                                        | NRL-HIV                                                                                                                         | Ivan Ivanov et al            |



|                |                                              |                                                                                                                                                                                                                                                          |                              |
|----------------|----------------------------------------------|----------------------------------------------------------------------------------------------------------------------------------------------------------------------------------------------------------------------------------------------------------|------------------------------|
| EPI_ISL_660521 | Laboratoire de Microbiologie CHU Souro Sanou | Centre Muraz                                                                                                                                                                                                                                             | Abdoul-Salam Ouedraogo et al |
| EPI_ISL_660507 | Laboratoire de Microbiologie CHU Souro Sanou | Centre Muraz                                                                                                                                                                                                                                             | Abdoul-Salam Ouedraogo et al |
| EPI_ISL_660488 | Laboratoire de Microbiologie CHU Souro Sanou | Centre Muraz                                                                                                                                                                                                                                             | Abdoul-Salam Ouedraogo et al |
| EPI_ISL_660468 | Laboratoire de Microbiologie CHU Souro Sanou | Centre Muraz                                                                                                                                                                                                                                             | Abdoul-Salam Ouedraogo et al |
| EPI_ISL_660511 | Laboratoire de Microbiologie CHU Souro Sanou | Centre Muraz                                                                                                                                                                                                                                             | Abdoul-Salam Ouedraogo et al |
| EPI_ISL_660489 | Laboratoire de Microbiologie CHU Souro Sanou | Centre Muraz                                                                                                                                                                                                                                             | Abdoul-Salam Ouedraogo et al |
| EPI_ISL_660497 | Laboratoire de Microbiologie CHU Souro Sanou | Centre Muraz                                                                                                                                                                                                                                             | Abdoul-Salam Ouedraogo et al |
| EPI_ISL_660495 | Laboratoire de Microbiologie CHU Souro Sanou | Centre Muraz                                                                                                                                                                                                                                             | Abdoul-Salam Ouedraogo et al |
| EPI_ISL_660471 | Laboratoire de Microbiologie CHU Souro Sanou | Centre Muraz                                                                                                                                                                                                                                             | Abdoul-Salam Ouedraogo et al |
| EPI_ISL_660472 | Laboratoire de Microbiologie CHU Souro Sanou | Centre Muraz                                                                                                                                                                                                                                             | Abdoul-Salam Ouedraogo et al |
| EPI_ISL_660473 | Laboratoire de Microbiologie CHU Souro Sanou | Centre Muraz                                                                                                                                                                                                                                             | Abdoul-Salam Ouedraogo et al |
| EPI_ISL_660519 | Laboratoire de Microbiologie CHU Souro Sanou | Centre Muraz                                                                                                                                                                                                                                             | Abdoul-Salam Ouedraogo et al |
| EPI_ISL_660474 | Laboratoire de Microbiologie CHU Souro Sanou | Centre Muraz                                                                                                                                                                                                                                             | Abdoul-Salam Ouedraogo et al |
| EPI_ISL_660475 | Laboratoire de Microbiologie CHU Souro Sanou | Centre Muraz                                                                                                                                                                                                                                             | Abdoul-Salam Ouedraogo et al |
| EPI_ISL_660476 | Laboratoire de Microbiologie CHU Souro Sanou | Centre Muraz                                                                                                                                                                                                                                             | Abdoul-Salam Ouedraogo et al |
| EPI_ISL_660516 | Laboratoire de Microbiologie CHU Souro Sanou | Centre Muraz                                                                                                                                                                                                                                             | Abdoul-Salam Ouedraogo et al |
| EPI_ISL_660477 | Laboratoire de Microbiologie CHU Souro Sanou | Centre Muraz                                                                                                                                                                                                                                             | Abdoul-Salam Ouedraogo et al |
| EPI_ISL_660522 | Laboratoire de Microbiologie CHU Souro Sanou | Centre Muraz                                                                                                                                                                                                                                             | Abdoul-Salam Ouedraogo et al |
| EPI_ISL_411902 | Virology Unit, Institut Pasteur du Cambodge. | Centre Muraz, Institut Pasteur du Cambodge (Sequencing done by: Jessica E Manning/Jennifer A Bohl at Malaria and Vector Research Research Laboratory, National Institute of Allergy and Infectious Diseases and Vida Ahyong from Chan-Zuckerberg Biohub) | Erik A Karlsson et al        |
| EPI_ISL_918376 | Virology Unit, Institut Pasteur du Cambodge  | Virology Unit, Institut Pasteur du Cambodge                                                                                                                                                                                                              | Sokhoun Yann et al           |
| EPI_ISL_918373 | Virology Unit, Institut Pasteur du Cambodge  | Virology Unit, Institut Pasteur du Cambodge                                                                                                                                                                                                              | Sokhoun Yann et al           |
| EPI_ISL_918374 | Virology Unit, Institut Pasteur du Cambodge  | Virology Unit, Institut Pasteur du Cambodge                                                                                                                                                                                                              | Sokhoun Yann et al           |
| EPI_ISL_918375 | Virology Unit, Institut Pasteur du Cambodge  | Virology Unit, Institut Pasteur du Cambodge                                                                                                                                                                                                              | Sokhoun Yann et al           |
| EPI_ISL_918367 | Virology Unit, Institut Pasteur du Cambodge  | Virology Unit, Institut Pasteur du Cambodge                                                                                                                                                                                                              | Sokhoun Yann et al           |
| EPI_ISL_918368 | Virology Unit, Institut Pasteur du Cambodge  | Virology Unit, Institut Pasteur du Cambodge                                                                                                                                                                                                              | Sokhoun Yann et al           |
| EPI_ISL_918369 | Virology Unit, Institut Pasteur du Cambodge  | Virology Unit, Institut Pasteur du Cambodge                                                                                                                                                                                                              | Sokhoun Yann et al           |
| EPI_ISL_918370 | Virology Unit, Institut Pasteur du Cambodge  | Virology Unit, Institut Pasteur du Cambodge                                                                                                                                                                                                              | Sokhoun Yann et al           |
| EPI_ISL_918371 | Virology Unit, Institut Pasteur du Cambodge  | Virology Unit, Institut Pasteur du Cambodge                                                                                                                                                                                                              | Sokhoun Yann et al           |
| EPI_ISL_918372 | Virology Unit, Institut Pasteur du Cambodge  | Virology Unit, Institut Pasteur du Cambodge                                                                                                                                                                                                              | Sokhoun Yann et al           |
| EPI_ISL_918366 | Virology Unit, Institut Pasteur du Cambodge  | Virology Unit, Institut Pasteur du Cambodge                                                                                                                                                                                                              | Sokhoun Yann et al           |
| EPI_ISL_918365 | Virology Unit, Institut Pasteur du Cambodge  | Virology Unit, Institut Pasteur du Cambodge                                                                                                                                                                                                              | Sokhoun Yann et al           |
| EPI_ISL_918359 | Virology Unit, Institut Pasteur du Cambodge  | Virology Unit, Institut Pasteur du Cambodge                                                                                                                                                                                                              | Sokhoun Yann et al           |
| EPI_ISL_918364 | Virology Unit, Institut Pasteur du Cambodge  | Virology Unit, Institut Pasteur du Cambodge                                                                                                                                                                                                              | Sokhoun Yann et al           |
| EPI_ISL_918363 | Virology Unit, Institut Pasteur du Cambodge  | Virology Unit, Institut Pasteur du Cambodge                                                                                                                                                                                                              | Sokhoun Yann et al           |
| EPI_ISL_918360 | Virology Unit, Institut Pasteur du Cambodge  | Virology Unit, Institut Pasteur du Cambodge                                                                                                                                                                                                              | Sokhoun Yann et al           |
| EPI_ISL_918362 | Virology Unit, Institut Pasteur du Cambodge  | Virology Unit, Institut Pasteur du Cambodge                                                                                                                                                                                                              | Sokhoun Yann et al           |
| EPI_ISL_918361 | Virology Unit, Institut Pasteur du Cambodge  | Virology Unit, Institut Pasteur du Cambodge                                                                                                                                                                                                              | Sokhoun Yann et al           |

|                 |                                                                                                                                                                                                                           |                                                                                                  |                          |
|-----------------|---------------------------------------------------------------------------------------------------------------------------------------------------------------------------------------------------------------------------|--------------------------------------------------------------------------------------------------|--------------------------|
| EPI_ISL_956389  | Isolation - Virology Unit, Institut Pasteur du Cambodge; Sequencing - US National Institute of Allergy and Infectious Diseases Cambodia, US Naval Medical Research Unit -2, Cambodia National Institute for Public Health | Virology Unit, Institut Pasteur du Cambodge                                                      | Vireak Heang et al       |
| EPI_ISL_956390  | Isolation - Virology Unit, Institut Pasteur du Cambodge; Sequencing - US National Institute of Allergy and Infectious Diseases Cambodia, US Naval Medical Research Unit -2, Cambodia National Institute for Public Health | Virology Unit, Institut Pasteur du Cambodge                                                      | Vireak Heang et al       |
| EPI_ISL_956392  | Isolation - Virology Unit, Institut Pasteur du Cambodge; Sequencing - US National Institute of Allergy and Infectious Diseases Cambodia, US Naval Medical Research Unit -2, Cambodia National Institute for Public Health | Virology Unit, Institut Pasteur du Cambodge                                                      | Vireak Heang et al       |
| EPI_ISL_956393  | Isolation - Virology Unit, Institut Pasteur du Cambodge; Sequencing - US National Institute of Allergy and Infectious Diseases Cambodia, US Naval Medical Research Unit -2, Cambodia National Institute for Public Health | Virology Unit, Institut Pasteur du Cambodge                                                      | Vireak Heang et al       |
| EPI_ISL_956394  | Isolation - Virology Unit, Institut Pasteur du Cambodge; Sequencing - US National Institute of Allergy and Infectious Diseases Cambodia, US Naval Medical Research Unit -2, Cambodia National Institute for Public Health | Virology Unit, Institut Pasteur du Cambodge                                                      | Vireak Heang et al       |
| EPI_ISL_956395  | Isolation - Virology Unit, Institut Pasteur du Cambodge; Sequencing - US National Institute of Allergy and Infectious Diseases Cambodia, US Naval Medical Research Unit -2, Cambodia National Institute for Public Health | Virology Unit, Institut Pasteur du Cambodge                                                      | Vireak Heang et al       |
| EPI_ISL_956396  | Isolation - Virology Unit, Institut Pasteur du Cambodge; Sequencing - US National Institute of Allergy and Infectious Diseases Cambodia, US Naval Medical Research Unit -2, Cambodia National Institute for Public Health | Virology Unit, Institut Pasteur du Cambodge                                                      | Vireak Heang et al       |
| EPI_ISL_956397  | Isolation - Virology Unit, Institut Pasteur du Cambodge; Sequencing - US National Institute of Allergy and Infectious Diseases Cambodia, US Naval Medical Research Unit -2, Cambodia National Institute for Public Health | Virology Unit, Institut Pasteur du Cambodge                                                      | Vireak Heang et al       |
| EPI_ISL_1001056 | Centre Pasteur du Cameroun                                                                                                                                                                                                | Institut Pasteur de Dakar                                                                        | Njouom Richard et al     |
| EPI_ISL_1001057 | Centre Pasteur du Cameroun                                                                                                                                                                                                | Institut Pasteur de Dakar                                                                        | Njouom Richard et al     |
| EPI_ISL_845548  | National Public Health Laboratory, Cameroon                                                                                                                                                                               | African Centre of Excellence for Genomics of Infectious Diseases (ACEGID), Redeemer's University | Oluniyi P.E. et al et al |
| EPI_ISL_845546  | National Public Health Laboratory, Cameroon                                                                                                                                                                               | African Centre of Excellence for Genomics of Infectious Diseases (ACEGID), Redeemer's University | Oluniyi P.E. et al et al |
| EPI_ISL_845549  | National Public Health Laboratory, Cameroon                                                                                                                                                                               | African Centre of Excellence for Genomics of Infectious Diseases (ACEGID), Redeemer's University | Oluniyi P.E. et al et al |
| EPI_ISL_845551  | National Public Health Laboratory, Cameroon                                                                                                                                                                               | African Centre of Excellence for Genomics of Infectious Diseases (ACEGID), Redeemer's University | Oluniyi P.E. et al et al |
| EPI_ISL_845550  | National Public Health Laboratory, Cameroon                                                                                                                                                                               | African Centre of Excellence for Genomics of Infectious Diseases (ACEGID), Redeemer's University | Oluniyi P.E. et al et al |
| EPI_ISL_845553  | National Public Health Laboratory, Cameroon                                                                                                                                                                               | African Centre of Excellence for Genomics of Infectious Diseases (ACEGID), Redeemer's University | Oluniyi P.E. et al et al |
| EPI_ISL_845552  | National Public Health Laboratory, Cameroon                                                                                                                                                                               | African Centre of Excellence for Genomics of Infectious Diseases (ACEGID), Redeemer's University | Oluniyi P.E. et al et al |
| EPI_ISL_845554  | National Public Health Laboratory, Cameroon                                                                                                                                                                               | African Centre of Excellence for Genomics of Infectious Diseases (ACEGID), Redeemer's University | Oluniyi P.E. et al et al |
| EPI_ISL_845564  | National Public Health Laboratory, Cameroon                                                                                                                                                                               | African Centre of Excellence for Genomics of Infectious Diseases (ACEGID), Redeemer's University | Oluniyi P.E. et al et al |

|                 |                                             |                                                                                                  |                          |
|-----------------|---------------------------------------------|--------------------------------------------------------------------------------------------------|--------------------------|
| EPI_ISL_845563  | National Public Health Laboratory, Cameroon | African Centre of Excellence for Genomics of Infectious Diseases (ACEGID), Redeemer's University | Oluniyi P.E. et al et al |
| EPI_ISL_845565  | National Public Health Laboratory, Cameroon | African Centre of Excellence for Genomics of Infectious Diseases (ACEGID), Redeemer's University | Oluniyi P.E. et al et al |
| EPI_ISL_845562  | National Public Health Laboratory, Cameroon | African Centre of Excellence for Genomics of Infectious Diseases (ACEGID), Redeemer's University | Oluniyi P.E. et al et al |
| EPI_ISL_845560  | National Public Health Laboratory, Cameroon | African Centre of Excellence for Genomics of Infectious Diseases (ACEGID), Redeemer's University | Oluniyi P.E. et al et al |
| EPI_ISL_845557  | National Public Health Laboratory, Cameroon | African Centre of Excellence for Genomics of Infectious Diseases (ACEGID), Redeemer's University | Oluniyi P.E. et al et al |
| EPI_ISL_845561  | National Public Health Laboratory, Cameroon | African Centre of Excellence for Genomics of Infectious Diseases (ACEGID), Redeemer's University | Oluniyi P.E. et al et al |
| EPI_ISL_845558  | National Public Health Laboratory, Cameroon | African Centre of Excellence for Genomics of Infectious Diseases (ACEGID), Redeemer's University | Oluniyi P.E. et al et al |
| EPI_ISL_1001051 | Centre Pasteur du Cameroun                  | Institut Pasteur de Dakar                                                                        | Njouom Richard et al     |
| EPI_ISL_1001052 | Centre Pasteur du Cameroun                  | Institut Pasteur de Dakar                                                                        | Njouom Richard et al     |
| EPI_ISL_1001053 | Centre Pasteur du Cameroun                  | Institut Pasteur de Dakar                                                                        | Njouom Richard et al     |
| EPI_ISL_1001068 | Centre Pasteur du Cameroun                  | Institut Pasteur de Dakar                                                                        | Njouom Richard et al     |
| EPI_ISL_1001060 | Centre Pasteur du Cameroun                  | Institut Pasteur de Dakar                                                                        | Njouom Richard et al     |
| EPI_ISL_1001062 | Centre Pasteur du Cameroun                  | Institut Pasteur de Dakar                                                                        | Njouom Richard et al     |
| EPI_ISL_1001063 | Centre Pasteur du Cameroun                  | Institut Pasteur de Dakar                                                                        | Njouom Richard et al     |
| EPI_ISL_1001064 | Centre Pasteur du Cameroun                  | Institut Pasteur de Dakar                                                                        | Njouom Richard et al     |
| EPI_ISL_1001065 | Centre Pasteur du Cameroun                  | Institut Pasteur de Dakar                                                                        | Njouom Richard et al     |
| EPI_ISL_1001067 | Centre Pasteur du Cameroun                  | Institut Pasteur de Dakar                                                                        | Njouom Richard et al     |
| EPI_ISL_1001059 | Centre Pasteur du Cameroun                  | Institut Pasteur de Dakar                                                                        | Njouom Richard et al     |
| EPI_ISL_1001044 | Centre Pasteur du Cameroun                  | Institut Pasteur de Dakar                                                                        | Njouom Richard et al     |
| EPI_ISL_1001045 | Centre Pasteur du Cameroun                  | Institut Pasteur de Dakar                                                                        | Njouom Richard et al     |
| EPI_ISL_1001048 | Centre Pasteur du Cameroun                  | Institut Pasteur de Dakar                                                                        | Njouom Richard et al     |
| EPI_ISL_1001049 | Centre Pasteur du Cameroun                  | Institut Pasteur de Dakar                                                                        | Njouom Richard et al     |
| EPI_ISL_1001050 | Centre Pasteur du Cameroun                  | Institut Pasteur de Dakar                                                                        | Njouom Richard et al     |
| EPI_ISL_1001043 | Centre Pasteur du Cameroun                  | Institut Pasteur de Dakar                                                                        | Njouom Richard et al     |
| EPI_ISL_806290  | Alberta Precision Labs (APL)                | Alberta Precision Labs (APL)                                                                     | Gordon P et al           |
| EPI_ISL_806319  | Alberta Precision Labs (APL)                | Alberta Precision Labs (APL)                                                                     | Gordon P et al           |
| EPI_ISL_806353  | Alberta Precision Labs (APL)                | Alberta Precision Labs (APL)                                                                     | Gordon P et al           |
| EPI_ISL_806126  | Alberta Precision Labs (APL)                | Alberta Precision Labs (APL)                                                                     | Gordon P et al           |
| EPI_ISL_806224  | Alberta Precision Labs (APL)                | Alberta Precision Labs (APL)                                                                     | Gordon P et al           |
| EPI_ISL_976553  | BCCDC Public Health Laboratory              | BCCDC Public Health Laboratory                                                                   | Prystajecy Natalie et al |
| EPI_ISL_976873  | BCCDC Public Health Laboratory              | BCCDC Public Health Laboratory                                                                   | Prystajecy Natalie et al |
| EPI_ISL_968946  | BCCDC Public Health Laboratory              | BCCDC Public Health Laboratory                                                                   | Prystajecy Natalie et al |
| EPI_ISL_968261  | BCCDC Public Health Laboratory              | BCCDC Public Health Laboratory                                                                   | Prystajecy Natalie et al |
| EPI_ISL_968251  | BCCDC Public Health Laboratory              | BCCDC Public Health Laboratory                                                                   | Prystajecy Natalie et al |
| EPI_ISL_968264  | BCCDC Public Health Laboratory              | BCCDC Public Health Laboratory                                                                   | Prystajecy Natalie et al |
| EPI_ISL_968378  | BCCDC Public Health Laboratory              | BCCDC Public Health Laboratory                                                                   | Prystajecy Natalie et al |



|                |                                |                                        |                           |
|----------------|--------------------------------|----------------------------------------|---------------------------|
| EPI_ISL_968379 | BCCDC Public Health Laboratory | BCCDC Public Health Laboratory         | Prystajecky Natalie et al |
| EPI_ISL_968389 | BCCDC Public Health Laboratory | BCCDC Public Health Laboratory         | Prystajecky Natalie et al |
| EPI_ISL_968465 | BCCDC Public Health Laboratory | BCCDC Public Health Laboratory         | Prystajecky Natalie et al |
| EPI_ISL_968492 | BCCDC Public Health Laboratory | BCCDC Public Health Laboratory         | Prystajecky Natalie et al |
| EPI_ISL_968518 | BCCDC Public Health Laboratory | BCCDC Public Health Laboratory         | Prystajecky Natalie et al |
| EPI_ISL_974076 | BCCDC Public Health Laboratory | BCCDC Public Health Laboratory         | Prystajecky Natalie et al |
| EPI_ISL_974568 | BCCDC Public Health Laboratory | BCCDC Public Health Laboratory         | Prystajecky Natalie et al |
| EPI_ISL_974171 | BCCDC Public Health Laboratory | BCCDC Public Health Laboratory         | Prystajecky Natalie et al |
| EPI_ISL_974172 | BCCDC Public Health Laboratory | BCCDC Public Health Laboratory         | Prystajecky Natalie et al |
| EPI_ISL_974173 | BCCDC Public Health Laboratory | BCCDC Public Health Laboratory         | Prystajecky Natalie et al |
| EPI_ISL_974174 | BCCDC Public Health Laboratory | BCCDC Public Health Laboratory         | Prystajecky Natalie et al |
| EPI_ISL_974177 | BCCDC Public Health Laboratory | BCCDC Public Health Laboratory         | Prystajecky Natalie et al |
| EPI_ISL_974178 | BCCDC Public Health Laboratory | BCCDC Public Health Laboratory         | Prystajecky Natalie et al |
| EPI_ISL_974179 | BCCDC Public Health Laboratory | BCCDC Public Health Laboratory         | Prystajecky Natalie et al |
| EPI_ISL_974180 | BCCDC Public Health Laboratory | BCCDC Public Health Laboratory         | Prystajecky Natalie et al |
| EPI_ISL_974721 | BCCDC Public Health Laboratory | BCCDC Public Health Laboratory         | Prystajecky Natalie et al |
| EPI_ISL_974262 | BCCDC Public Health Laboratory | BCCDC Public Health Laboratory         | Prystajecky Natalie et al |
| EPI_ISL_976302 | BCCDC Public Health Laboratory | BCCDC Public Health Laboratory         | Prystajecky Natalie et al |
| EPI_ISL_976243 | BCCDC Public Health Laboratory | BCCDC Public Health Laboratory         | Prystajecky Natalie et al |
| EPI_ISL_976424 | BCCDC Public Health Laboratory | BCCDC Public Health Laboratory         | Prystajecky Natalie et al |
| EPI_ISL_976425 | BCCDC Public Health Laboratory | BCCDC Public Health Laboratory         | Prystajecky Natalie et al |
| EPI_ISL_976278 | BCCDC Public Health Laboratory | BCCDC Public Health Laboratory         | Prystajecky Natalie et al |
| EPI_ISL_976439 | BCCDC Public Health Laboratory | BCCDC Public Health Laboratory         | Prystajecky Natalie et al |
| EPI_ISL_976601 | BCCDC Public Health Laboratory | BCCDC Public Health Laboratory         | Prystajecky Natalie et al |
| EPI_ISL_976423 | BCCDC Public Health Laboratory | BCCDC Public Health Laboratory         | Prystajecky Natalie et al |
| EPI_ISL_415578 | BCCDC Public Health Laboratory | BCCDC Public Health Laboratory         | Harrigan et al            |
| EPI_ISL_415580 | BCCDC Public Health Laboratory | BCCDC Public Health Laboratory         | Harrigan et al            |
| EPI_ISL_412965 | BCCDC Public Health Laboratory | BCCDC Public Health Laboratory         | Harrigan et al            |
| EPI_ISL_415577 | BCCDC Public Health Laboratory | BCCDC Public Health Laboratory         | Harrigan et al            |
| EPI_ISL_848196 | Microbiology Lab               | NBCC Sequencing Facility               | Dr. Jeff Wrana et al      |
| EPI_ISL_848197 | Microbiology Lab               | NBCC Sequencing Facility               | Dr. Jeff Wrana et al      |
| EPI_ISL_852829 | Microbiology Lab               | NBCC Sequencing Facility               | Dr. Jeff Wrana et al      |
| EPI_ISL_582392 | Cadham Provincial Laboratory   | National Microbiology Laboratory (NML) | Anna Majer et al          |
| EPI_ISL_582396 | Cadham Provincial Laboratory   | National Microbiology Laboratory (NML) | Anna Majer et al          |
| EPI_ISL_582403 | Cadham Provincial Laboratory   | National Microbiology Laboratory (NML) | Anna Majer et al          |
| EPI_ISL_582410 | Cadham Provincial Laboratory   | National Microbiology Laboratory (NML) | Anna Majer et al          |
| EPI_ISL_582411 | Cadham Provincial Laboratory   | National Microbiology Laboratory (NML) | Anna Majer et al          |
| EPI_ISL_582422 | Cadham Provincial Laboratory   | National Microbiology Laboratory (NML) | Anna Majer et al          |
| EPI_ISL_582425 | Cadham Provincial Laboratory   | National Microbiology Laboratory (NML) | Anna Majer et al          |

|                |                                                                           |                                        |                         |
|----------------|---------------------------------------------------------------------------|----------------------------------------|-------------------------|
| EPI_ISL_582431 | Cadham Provincial Laboratory                                              | National Microbiology Laboratory (NML) | Anna Majer et al        |
| EPI_ISL_582488 | Cadham Provincial Laboratory                                              | National Microbiology Laboratory (NML) | Anna Majer et al        |
| EPI_ISL_582499 | Cadham Provincial Laboratory                                              | National Microbiology Laboratory (NML) | Anna Majer et al        |
| EPI_ISL_582503 | Cadham Provincial Laboratory                                              | National Microbiology Laboratory (NML) | Anna Majer et al        |
| EPI_ISL_935774 | Cadham Provincial laboratory                                              | National Microbiology Laboratory (NML) | Anna Majer et al        |
| EPI_ISL_935791 | Cadham Provincial laboratory                                              | National Microbiology Laboratory (NML) | Anna Majer et al        |
| EPI_ISL_935858 | Cadham Provincial laboratory                                              | National Microbiology Laboratory (NML) | Anna Majer et al        |
| EPI_ISL_935868 | Cadham Provincial laboratory                                              | National Microbiology Laboratory (NML) | Anna Majer et al        |
| EPI_ISL_582263 | Cadham Provincial Laboratory                                              | National Microbiology Laboratory (NML) | Anna Majer et al        |
| EPI_ISL_582283 | Cadham Provincial Laboratory                                              | National Microbiology Laboratory (NML) | Anna Majer et al        |
| EPI_ISL_582322 | Cadham Provincial Laboratory                                              | National Microbiology Laboratory (NML) | Anna Majer et al        |
| EPI_ISL_582364 | Cadham Provincial Laboratory                                              | National Microbiology Laboratory (NML) | Anna Majer et al        |
| EPI_ISL_582368 | Cadham Provincial Laboratory                                              | National Microbiology Laboratory (NML) | Anna Majer et al        |
| EPI_ISL_593507 | Eastern Ontario Regional Laboratory Association                           | McMaster University                    | Leanne Mortimer et al   |
| EPI_ISL_593513 | Eastern Ontario Regional Laboratory Association                           | McMaster University                    | Leanne Mortimer et al   |
| EPI_ISL_593527 | Eastern Ontario Regional Laboratory Association                           | McMaster University                    | Leanne Mortimer et al   |
| EPI_ISL_593532 | Eastern Ontario Regional Laboratory Association                           | McMaster University                    | Leanne Mortimer et al   |
| EPI_ISL_538348 | Kingston Health Sciences Centre / Queen's University                      | Ontario Institute for Cancer Research  | Prameet M. Sheth et al  |
| EPI_ISL_538349 | Kingston Health Sciences Centre / Queen's University                      | Ontario Institute for Cancer Research  | Prameet M. Sheth et al  |
| EPI_ISL_538351 | Kingston Health Sciences Centre / Queen's University                      | Ontario Institute for Cancer Research  | Prameet M. Sheth et al  |
| EPI_ISL_538386 | Kingston Health Sciences Centre / Queen's University                      | Ontario Institute for Cancer Research  | Prameet M. Sheth et al  |
| EPI_ISL_853127 | Toronto Invasive Bacterial Diseases Network                               | Ontario Institute for Cancer Research  | Allison McGeer et al    |
| EPI_ISL_853120 | Toronto Invasive Bacterial Diseases Network                               | Ontario Institute for Cancer Research  | Allison McGeer et al    |
| EPI_ISL_982782 | University Health Network/Mount Sinai Hospital Department of Microbiology | Ontario Institute for Cancer Research  | Marie-Ming Aynaud et al |
| EPI_ISL_982819 | University Health Network/Mount Sinai Hospital Department of Microbiology | Ontario Institute for Cancer Research  | Marie-Ming Aynaud et al |
| EPI_ISL_983056 | University Health Network/Mount Sinai Hospital Department of Microbiology | Ontario Institute for Cancer Research  | Marie-Ming Aynaud et al |
| EPI_ISL_983221 | University Health Network/Mount Sinai Hospital Department of Microbiology | Ontario Institute for Cancer Research  | Marie-Ming Aynaud et al |
| EPI_ISL_983187 | University Health Network/Mount Sinai Hospital Department of Microbiology | Ontario Institute for Cancer Research  | Marie-Ming Aynaud et al |
| EPI_ISL_983184 | University Health Network/Mount Sinai Hospital Department of Microbiology | Ontario Institute for Cancer Research  | Marie-Ming Aynaud et al |
| EPI_ISL_983042 | University Health Network/Mount Sinai Hospital Department of Microbiology | Ontario Institute for Cancer Research  | Marie-Ming Aynaud et al |
| EPI_ISL_982981 | University Health Network/Mount Sinai Hospital Department of Microbiology | Ontario Institute for Cancer Research  | Marie-Ming Aynaud et al |
| EPI_ISL_982949 | University Health Network/Mount Sinai Hospital Department of Microbiology | Ontario Institute for Cancer Research  | Marie-Ming Aynaud et al |
| EPI_ISL_982952 | University Health Network/Mount Sinai Hospital Department of Microbiology | Ontario Institute for Cancer Research  | Marie-Ming Aynaud et al |
| EPI_ISL_591103 | Toronto Invasive Bacterial Diseases Network                               | McMaster University                    | Allison McGeer et al    |

|                |                                             |                                                                   |                        |
|----------------|---------------------------------------------|-------------------------------------------------------------------|------------------------|
| EPI_ISL_591112 | Toronto Invasive Bacterial Diseases Network | McMaster University                                               | Allison McGeer et al   |
| EPI_ISL_591115 | Toronto Invasive Bacterial Diseases Network | McMaster University                                               | Allison McGeer et al   |
| EPI_ISL_755889 | Toronto Invasive Bacterial Diseases Network | McMaster University                                               | Allison McGeer et al   |
| EPI_ISL_755898 | Toronto Invasive Bacterial Diseases Network | McMaster University                                               | Allison McGeer et al   |
| EPI_ISL_755899 | Toronto Invasive Bacterial Diseases Network | McMaster University                                               | Allison McGeer et al   |
| EPI_ISL_755758 | Toronto Invasive Bacterial Diseases Network | McMaster University                                               | Allison McGeer et al   |
| EPI_ISL_729285 | Toronto Invasive Bacterial Diseases Network | McMaster University                                               | Allison McGeer et al   |
| EPI_ISL_729310 | Toronto Invasive Bacterial Diseases Network | McMaster University                                               | Allison McGeer et al   |
| EPI_ISL_755696 | Toronto Invasive Bacterial Diseases Network | McMaster University                                               | Allison McGeer et al   |
| EPI_ISL_755699 | Toronto Invasive Bacterial Diseases Network | McMaster University                                               | Allison McGeer et al   |
| EPI_ISL_961405 | Toronto Invasive Bacterial Diseases Network | McMaster University                                               | Allison McGeer et al   |
| EPI_ISL_933638 | Toronto Invasive Bacterial Diseases Network | McMaster University                                               | Allison McGeer et al   |
| EPI_ISL_933645 | Toronto Invasive Bacterial Diseases Network | McMaster University                                               | Allison McGeer et al   |
| EPI_ISL_933647 | Toronto Invasive Bacterial Diseases Network | McMaster University                                               | Allison McGeer et al   |
| EPI_ISL_933646 | Toronto Invasive Bacterial Diseases Network | McMaster University                                               | Allison McGeer et al   |
| EPI_ISL_933651 | Toronto Invasive Bacterial Diseases Network | McMaster University                                               | Allison McGeer et al   |
| EPI_ISL_933652 | Toronto Invasive Bacterial Diseases Network | McMaster University                                               | Allison McGeer et al   |
| EPI_ISL_791502 | The Hosptial for Sick Children              | The Hospital for Sick Children                                    | Aaron Campigotto et al |
| EPI_ISL_791511 | The Hosptial for Sick Children              | The Hospital for Sick Children                                    | Aaron Campigotto et al |
| EPI_ISL_569950 | Unity Health Toronto                        | Ontario Institute for Cancer Research                             | Ramzi Fattouh et al    |
| EPI_ISL_569951 | Unity Health Toronto                        | Ontario Institute for Cancer Research                             | Ramzi Fattouh et al    |
| EPI_ISL_569959 | Unity Health Toronto                        | Ontario Institute for Cancer Research                             | Ramzi Fattouh et al    |
| EPI_ISL_569976 | Unity Health Toronto                        | Ontario Institute for Cancer Research                             | Ramzi Fattouh et al    |
| EPI_ISL_569963 | Unity Health Toronto                        | Ontario Institute for Cancer Research                             | Ramzi Fattouh et al    |
| EPI_ISL_569954 | Unity Health Toronto                        | Ontario Institute for Cancer Research                             | Ramzi Fattouh et al    |
| EPI_ISL_569974 | Unity Health Toronto                        | Ontario Institute for Cancer Research                             | Ramzi Fattouh et al    |
| EPI_ISL_570024 | Unity Health Toronto                        | Ontario Institute for Cancer Research                             | Ramzi Fattouh et al    |
| EPI_ISL_569989 | Unity Health Toronto                        | Ontario Institute for Cancer Research                             | Ramzi Fattouh et al    |
| EPI_ISL_569988 | Unity Health Toronto                        | Ontario Institute for Cancer Research                             | Ramzi Fattouh et al    |
| EPI_ISL_464019 | Unity Health Toronto                        | Ontario Institute for Cancer Research                             | Ramzi Fattouh et al    |
| EPI_ISL_526257 | Unity Health Toronto                        | Ontario Institute for Cancer Research                             | Ramzi Fattouh et al    |
| EPI_ISL_526262 | Unity Health Toronto                        | Ontario Institute for Cancer Research                             | Ramzi Fattouh et al    |
| EPI_ISL_526267 | Unity Health Toronto                        | Ontario Institute for Cancer Research                             | Ramzi Fattouh et al    |
| EPI_ISL_526282 | Unity Health Toronto                        | Ontario Institute for Cancer Research                             | Ramzi Fattouh et al    |
| EPI_ISL_526286 | Unity Health Toronto                        | Ontario Institute for Cancer Research                             | Ramzi Fattouh et al    |
| EPI_ISL_609821 | Unity Health Toronto                        | Ontario Institute for Cancer Research                             | Ramzi Fattouh et al    |
| EPI_ISL_463975 | Toronto Invasive Bacterial Diseases Network | McMaster University                                               | Allison McGeer et al   |
| EPI_ISL_463984 | Toronto Invasive Bacterial Diseases Network | McMaster University                                               | Allison McGeer et al   |
| EPI_ISL_425177 | Public Health Ontario                       | Public Health Agency of Canada - National Microbiology Laboratory | Amrit S. Boese et al   |

|                |                                                                                                                                                        |                                                                                                                         |                         |
|----------------|--------------------------------------------------------------------------------------------------------------------------------------------------------|-------------------------------------------------------------------------------------------------------------------------|-------------------------|
| EPI_ISL_450747 | Sunnybrook Health Sciences Centre                                                                                                                      | Department of Laboratory Medicine and Molecular Diagnostics, Sunnybrook Health Sciences Centre                          | Jalees A. Nasir et al   |
| EPI_ISL_413015 | Public Health Ontario Laboratory                                                                                                                       | National Microbiology Laboratory                                                                                        | Shari Tyson et al       |
| EPI_ISL_890391 | Laboratoire de santé publique du Québec                                                                                                                | Laboratoire de santé publique du Québec                                                                                 | Sandrine Moreira et al  |
| EPI_ISL_889844 | Laboratoire de santé publique du Québec                                                                                                                | Laboratoire de santé publique du Québec                                                                                 | Sandrine Moreira et al  |
| EPI_ISL_954444 | Laboratoire de santé publique du Québec                                                                                                                | Laboratoire de santé publique du Québec                                                                                 | Sandrine Moreira et al  |
| EPI_ISL_535985 | Hôpital de Rouyn-Noranda                                                                                                                               | Laboratoire de santé publique du Québec                                                                                 | Sandrine Moreira et al  |
| EPI_ISL_536132 | Hôpital de Hull                                                                                                                                        | Laboratoire de santé publique du Québec                                                                                 | Sandrine Moreira et al  |
| EPI_ISL_536169 | Hôpital de Hull                                                                                                                                        | Laboratoire de santé publique du Québec                                                                                 | Sandrine Moreira et al  |
| EPI_ISL_536274 | Hôpital du Suroît                                                                                                                                      | Laboratoire de santé publique du Québec                                                                                 | Sandrine Moreira et al  |
| EPI_ISL_536308 | Hôpital Pierre-Boucher                                                                                                                                 | Laboratoire de santé publique du Québec                                                                                 | Sandrine Moreira et al  |
| EPI_ISL_536309 | Hôpital Pierre-Boucher                                                                                                                                 | Laboratoire de santé publique du Québec                                                                                 | Sandrine Moreira et al  |
| EPI_ISL_825812 | Laboratoire de santé publique du Québec                                                                                                                | Laboratoire de santé publique du Québec                                                                                 | Sandrine Moreira et al  |
| EPI_ISL_825826 | Laboratoire de santé publique du Québec                                                                                                                | Laboratoire de santé publique du Québec                                                                                 | Sandrine Moreira et al  |
| EPI_ISL_825821 | Laboratoire de santé publique du Québec                                                                                                                | Laboratoire de santé publique du Québec                                                                                 | Sandrine Moreira et al  |
| EPI_ISL_825796 | Laboratoire de santé publique du Québec                                                                                                                | Laboratoire de santé publique du Québec                                                                                 | Sandrine Moreira et al  |
| EPI_ISL_826256 | Laboratoire de santé publique du Québec                                                                                                                | Laboratoire de santé publique du Québec                                                                                 | Sandrine Moreira et al  |
| EPI_ISL_667775 | Microbiology, Infectious Diseases and Immunology, Centre de Recherche du Centre Hospitalier de l'Université de Montreal                                | Microbiology, Infectious Diseases and Immunology, Centre de Recherche du Centre Hospitalier de l'Université de Montreal | Benoit et al            |
| EPI_ISL_667769 | Microbiology, Infectious Diseases and Immunology, Centre de Recherche du Centre Hospitalier de l'Université de Montreal                                | Microbiology, Infectious Diseases and Immunology, Centre de Recherche du Centre Hospitalier de l'Université de Montreal | Benoit et al            |
| EPI_ISL_667767 | Microbiology, Infectious Diseases and Immunology, Centre de Recherche du Centre Hospitalier de l'Université de Montreal                                | Microbiology, Infectious Diseases and Immunology, Centre de Recherche du Centre Hospitalier de l'Université de Montreal | Benoit et al            |
| EPI_ISL_667759 | Microbiology, Infectious Diseases and Immunology, Centre de Recherche du Centre Hospitalier de l'Université de Montreal                                | Microbiology, Infectious Diseases and Immunology, Centre de Recherche du Centre Hospitalier de l'Université de Montreal | Benoit et al            |
| EPI_ISL_746498 | Genetica Molecular and Subdepartamento de Virologia ISP Chile                                                                                          | Instituto de Salud Publica de Chile                                                                                     | Javier Tognarelli et al |
| EPI_ISL_746500 | Genetica Molecular and Subdepartamento de Virologia ISP Chile                                                                                          | Instituto de Salud Publica de Chile                                                                                     | Javier Tognarelli et al |
| EPI_ISL_746481 | Genetica Molecular and Subdepartamento de Virologia ISP Chile                                                                                          | Instituto de Salud Publica de Chile                                                                                     | Javier Tognarelli et al |
| EPI_ISL_746501 | Genetica Molecular and Subdepartamento de Virologia ISP Chile                                                                                          | Instituto de Salud Publica de Chile                                                                                     | Javier Tognarelli et al |
| EPI_ISL_746503 | Genetica Molecular and Subdepartamento de Virologia ISP Chile                                                                                          | Instituto de Salud Publica de Chile                                                                                     | Javier Tognarelli et al |
| EPI_ISL_468754 | Laboratorio de Biología Molecular, Facultad de Medicina, Universidad de Atacama                                                                        | Center for Mathematical Modeling and Center for Genome Regulation. Santiago, Chile                                      | Gaete A et al           |
| EPI_ISL_626554 | Laboratorio de Biología Molecular, Facultad de Medicina, Universidad de Atacama, Copiapo, Chile/ FONDAF CRG, Universidad Andrés Bello, Santiago, Chile | Center for Mathematical Modeling and Center for Genome Regulation. Santiago, Chile                                      | Echeverría C et al      |
| EPI_ISL_626555 | Laboratorio de Biología Molecular, Facultad de Medicina, Universidad de Atacama, Copiapo, Chile/ FONDAF CRG, Universidad Andrés Bello, Santiago, Chile | Center for Mathematical Modeling and Center for Genome Regulation. Santiago, Chile                                      | Echeverría C et al      |
| EPI_ISL_746506 | Genetica Molecular and Subdepartamento de Virologia ISP Chile                                                                                          | Instituto de Salud Publica de Chile                                                                                     | Javier Tognarelli et al |
| EPI_ISL_746507 | Genetica Molecular and Subdepartamento de Virologia ISP Chile                                                                                          | Instituto de Salud Publica de Chile                                                                                     | Javier Tognarelli et al |
| EPI_ISL_746508 | Genetica Molecular and Subdepartamento de Virologia ISP Chile                                                                                          | Instituto de Salud Publica de Chile                                                                                     | Javier Tognarelli et al |
| EPI_ISL_746509 | Genetica Molecular and Subdepartamento de Virologia ISP Chile                                                                                          | Instituto de Salud Publica de Chile                                                                                     | Javier Tognarelli et al |
| EPI_ISL_746511 | Genetica Molecular and Subdepartamento de Virologia ISP Chile                                                                                          | Instituto de Salud Publica de Chile                                                                                     | Javier Tognarelli et al |
| EPI_ISL_746512 | Genetica Molecular and Subdepartamento de Virologia ISP Chile                                                                                          | Instituto de Salud Publica de Chile                                                                                     | Javier Tognarelli et al |

|                |                                                                            |                                                                                    |                             |
|----------------|----------------------------------------------------------------------------|------------------------------------------------------------------------------------|-----------------------------|
| EPI_ISL_746513 | Genetica Molecular and Subdepartamento de Virologia ISP Chile              | Instituto de Salud Publica de Chile                                                | Javier Tognarelli et al     |
| EPI_ISL_746514 | Genetica Molecular and Subdepartamento de Virologia ISP Chile              | Instituto de Salud Publica de Chile                                                | Javier Tognarelli et al     |
| EPI_ISL_746516 | Genetica Molecular and Subdepartamento de Virologia ISP Chile              | Instituto de Salud Publica de Chile                                                | Javier Tognarelli et al     |
| EPI_ISL_746519 | Genetica Molecular and Subdepartamento de Virologia ISP Chile              | Instituto de Salud Publica de Chile                                                | Javier Tognarelli et al     |
| EPI_ISL_468760 | Center for Genome Regulation (CRG)                                         | Center for Mathematical Modeling and Center for Genome Regulation. Santiago, Chile | Gaete A et al               |
| EPI_ISL_445281 | HOSPITAL CLINICO DEL SUR                                                   | Instituto de Salud Publica de Chile                                                | Andrés E Castillo et al     |
| EPI_ISL_445271 | LABORATORIO CLINICA CHILLAN                                                | Instituto de Salud Publica de Chile                                                | Andrés E Castillo et al     |
| EPI_ISL_445331 | HOSPITAL HERMINDA MARTIN CHILLAN                                           | Instituto de Salud Publica de Chile                                                | Andrés E Castillo et al     |
| EPI_ISL_445378 | HOSPITAL DE BULNES                                                         | Instituto de Salud Publica de Chile                                                | Andrés E Castillo et al     |
| EPI_ISL_746530 | Genetica Molecular and Subdepartamento de Virologia ISP Chile              | Instituto de Salud Publica de Chile                                                | Javier Tognarelli et al     |
| EPI_ISL_746533 | Genetica Molecular and Subdepartamento de Virologia ISP Chile              | Instituto de Salud Publica de Chile                                                | Javier Tognarelli et al     |
| EPI_ISL_445282 | CLINICA MAGALLANES S.A.                                                    | Instituto de Salud Publica de Chile                                                | Andrés E Castillo et al     |
| EPI_ISL_746537 | Genetica Molecular and Subdepartamento de Virologia ISP Chile              | Instituto de Salud Publica de Chile                                                | Javier Tognarelli et al     |
| EPI_ISL_746538 | Genetica Molecular and Subdepartamento de Virologia ISP Chile              | Instituto de Salud Publica de Chile                                                | Javier Tognarelli et al     |
| EPI_ISL_746539 | Genetica Molecular and Subdepartamento de Virologia ISP Chile              | Instituto de Salud Publica de Chile                                                | Javier Tognarelli et al     |
| EPI_ISL_746542 | Genetica Molecular and Subdepartamento de Virologia ISP Chile              | Instituto de Salud Publica de Chile                                                | Javier Tognarelli et al     |
| EPI_ISL_746543 | Genetica Molecular and Subdepartamento de Virologia ISP Chile              | Instituto de Salud Publica de Chile                                                | Javier Tognarelli et al     |
| EPI_ISL_801852 | Laboratory of Molecular Virology, Pontificia Universidad Católica de Chile | MSSH Pathogen Surveillance Program                                                 | Leonardo I. Almonacid et al |
| EPI_ISL_746549 | Genetica Molecular and Subdepartamento de Virologia ISP Chile              | Instituto de Salud Publica de Chile                                                | Javier Tognarelli et al     |
| EPI_ISL_746551 | Genetica Molecular and Subdepartamento de Virologia ISP Chile              | Instituto de Salud Publica de Chile                                                | Javier Tognarelli et al     |
| EPI_ISL_746559 | Genetica Molecular and Subdepartamento de Virologia ISP Chile              | Instituto de Salud Publica de Chile                                                | Javier Tognarelli et al     |
| EPI_ISL_746563 | Genetica Molecular and Subdepartamento de Virologia ISP Chile              | Instituto de Salud Publica de Chile                                                | Javier Tognarelli et al     |
| EPI_ISL_746567 | Genetica Molecular and Subdepartamento de Virologia ISP Chile              | Instituto de Salud Publica de Chile                                                | Javier Tognarelli et al     |
| EPI_ISL_746573 | Genetica Molecular and Subdepartamento de Virologia ISP Chile              | Instituto de Salud Publica de Chile                                                | Javier Tognarelli et al     |
| EPI_ISL_746574 | Genetica Molecular and Subdepartamento de Virologia ISP Chile              | Instituto de Salud Publica de Chile                                                | Javier Tognarelli et al     |
| EPI_ISL_746581 | Genetica Molecular and Subdepartamento de Virologia ISP Chile              | Instituto de Salud Publica de Chile                                                | Javier Tognarelli et al     |
| EPI_ISL_746584 | Genetica Molecular and Subdepartamento de Virologia ISP Chile              | Instituto de Salud Publica de Chile                                                | Javier Tognarelli et al     |
| EPI_ISL_746602 | Genetica Molecular and Subdepartamento de Virologia ISP Chile              | Instituto de Salud Publica de Chile                                                | Javier Tognarelli et al     |
| EPI_ISL_746607 | Genetica Molecular and Subdepartamento de Virologia ISP Chile              | Instituto de Salud Publica de Chile                                                | Javier Tognarelli et al     |
| EPI_ISL_746609 | Genetica Molecular and Subdepartamento de Virologia ISP Chile              | Instituto de Salud Publica de Chile                                                | Javier Tognarelli et al     |
| EPI_ISL_746613 | Genetica Molecular and Subdepartamento de Virologia ISP Chile              | Instituto de Salud Publica de Chile                                                | Javier Tognarelli et al     |
| EPI_ISL_746616 | Genetica Molecular and Subdepartamento de Virologia ISP Chile              | Instituto de Salud Publica de Chile                                                | Javier Tognarelli et al     |
| EPI_ISL_746624 | Genetica Molecular and Subdepartamento de Virologia ISP Chile              | Instituto de Salud Publica de Chile                                                | Javier Tognarelli et al     |
| EPI_ISL_746625 | Genetica Molecular and Subdepartamento de Virologia ISP Chile              | Instituto de Salud Publica de Chile                                                | Javier Tognarelli et al     |
| EPI_ISL_746631 | Genetica Molecular and Subdepartamento de Virologia ISP Chile              | Instituto de Salud Publica de Chile                                                | Javier Tognarelli et al     |
| EPI_ISL_746640 | Genetica Molecular and Subdepartamento de Virologia ISP Chile              | Instituto de Salud Publica de Chile                                                | Javier Tognarelli et al     |
| EPI_ISL_746642 | Genetica Molecular and Subdepartamento de Virologia ISP Chile              | Instituto de Salud Publica de Chile                                                | Javier Tognarelli et al     |
| EPI_ISL_746644 | Genetica Molecular and Subdepartamento de Virologia ISP Chile              | Instituto de Salud Publica de Chile                                                | Javier Tognarelli et al     |





|                |                                                                            |                                                                                    |                             |
|----------------|----------------------------------------------------------------------------|------------------------------------------------------------------------------------|-----------------------------|
| EPI_ISL_591528 | Medicina Norte U Chile - Servicio Medico Legal                             | Center for Mathematical Modeling and Center for Genome Regulation. Santiago, Chile | Gaggero A et al             |
| EPI_ISL_591530 | Medicina Norte U Chile - Servicio Medico Legal                             | Center for Mathematical Modeling and Center for Genome Regulation. Santiago, Chile | Gaggero A et al             |
| EPI_ISL_591532 | Laboratorio de Infectologia y virologia molecular                          | Center for Mathematical Modeling and Center for Genome Regulation. Santiago, Chile | Valiente F et al            |
| EPI_ISL_445303 | CTRO.DE SALUD FAMILIAR DR. RAUL YAZIGI                                     | Instituto de Salud Publica de Chile                                                | Andrés E Castillo et al     |
| EPI_ISL_445305 | HOSPITAL DE CARABINEROS                                                    | Instituto de Salud Publica de Chile                                                | Andrés E Castillo et al     |
| EPI_ISL_445315 | CLINICA UC SAN CARLOS DE APOQUINDO                                         | Instituto de Salud Publica de Chile                                                | Andrés E Castillo et al     |
| EPI_ISL_445349 | HOSPITAL SAN JUAN DE DIOS                                                  | Instituto de Salud Publica de Chile                                                | Andrés E Castillo et al     |
| EPI_ISL_445350 | HOSPITAL SAN JUAN DE DIOS                                                  | Instituto de Salud Publica de Chile                                                | Andrés E Castillo et al     |
| EPI_ISL_445352 | HOSPITAL DEL PROFESOR                                                      | Instituto de Salud Publica de Chile                                                | Andrés E Castillo et al     |
| EPI_ISL_445367 | ASISTENCIA PUBLICA DR.ALEJANDRO DEL RIO                                    | Instituto de Salud Publica de Chile                                                | Andrés E Castillo et al     |
| EPI_ISL_445369 | HOSPITAL DE CARABINEROS                                                    | Instituto de Salud Publica de Chile                                                | Andrés E Castillo et al     |
| EPI_ISL_445370 | HOSPITAL DE CARABINEROS                                                    | Instituto de Salud Publica de Chile                                                | Andrés E Castillo et al     |
| EPI_ISL_445373 | HOSPITAL SAN JUAN DE DIOS                                                  | Instituto de Salud Publica de Chile                                                | Andrés E Castillo et al     |
| EPI_ISL_445374 | HOSPITAL SAN JUAN DE DIOS                                                  | Instituto de Salud Publica de Chile                                                | Andrés E Castillo et al     |
| EPI_ISL_445375 | HOSPITAL SAN JUAN DE DIOS                                                  | Instituto de Salud Publica de Chile                                                | Andrés E Castillo et al     |
| EPI_ISL_591524 | Medicina Norte U Chile - Servicio Medico Legal                             | Center for Mathematical Modeling and Center for Genome Regulation. Santiago, Chile | Gaggero A et al             |
| EPI_ISL_801555 | Laboratory of Molecular Virology, Pontificia Universidad Católica de Chile | MSHS Pathogen Surveillance Program                                                 | Leonardo I. Almonacid et al |
| EPI_ISL_801558 | Laboratory of Molecular Virology, Pontificia Universidad Católica de Chile | MSHS Pathogen Surveillance Program                                                 | Leonardo I. Almonacid et al |
| EPI_ISL_801559 | Laboratory of Molecular Virology, Pontificia Universidad Católica de Chile | MSHS Pathogen Surveillance Program                                                 | Leonardo I. Almonacid et al |
| EPI_ISL_801564 | Laboratory of Molecular Virology, Pontificia Universidad Católica de Chile | MSHS Pathogen Surveillance Program                                                 | Leonardo I. Almonacid et al |
| EPI_ISL_801566 | Laboratory of Molecular Virology, Pontificia Universidad Católica de Chile | MSHS Pathogen Surveillance Program                                                 | Leonardo I. Almonacid et al |
| EPI_ISL_801579 | Laboratory of Molecular Virology, Pontificia Universidad Católica de Chile | MSHS Pathogen Surveillance Program                                                 | Leonardo I. Almonacid et al |
| EPI_ISL_801606 | Laboratory of Molecular Virology, Pontificia Universidad Católica de Chile | MSHS Pathogen Surveillance Program                                                 | Leonardo I. Almonacid et al |
| EPI_ISL_801612 | Laboratory of Molecular Virology, Pontificia Universidad Católica de Chile | MSHS Pathogen Surveillance Program                                                 | Leonardo I. Almonacid et al |
| EPI_ISL_801613 | Laboratory of Molecular Virology, Pontificia Universidad Católica de Chile | MSHS Pathogen Surveillance Program                                                 | Leonardo I. Almonacid et al |
| EPI_ISL_801647 | Laboratory of Molecular Virology, Pontificia Universidad Católica de Chile | MSHS Pathogen Surveillance Program                                                 | Leonardo I. Almonacid et al |
| EPI_ISL_801663 | Laboratory of Molecular Virology, Pontificia Universidad Católica de Chile | MSHS Pathogen Surveillance Program                                                 | Leonardo I. Almonacid et al |
| EPI_ISL_801696 | Laboratory of Molecular Virology, Pontificia Universidad Católica de Chile | MSHS Pathogen Surveillance Program                                                 | Leonardo I. Almonacid et al |
| EPI_ISL_801731 | Laboratory of Molecular Virology, Pontificia Universidad Católica de Chile | MSHS Pathogen Surveillance Program                                                 | Leonardo I. Almonacid et al |
| EPI_ISL_801732 | Laboratory of Molecular Virology, Pontificia Universidad Católica de Chile | MSHS Pathogen Surveillance Program                                                 | Leonardo I. Almonacid et al |





|                |                                                                                                                                                    |                                                                                                                                                                                                                  |                               |
|----------------|----------------------------------------------------------------------------------------------------------------------------------------------------|------------------------------------------------------------------------------------------------------------------------------------------------------------------------------------------------------------------|-------------------------------|
| EPI_ISL_941152 | Centro de Investigaciones en Microbiología y Biotecnología-UR (CIMBIUR), Facultad de Ciencias Naturales, Universidad del Rosario, Bogotá, Colombia | Centro de Investigaciones en Microbiología y Biotecnología-UR (CIMBIUR), Facultad de Ciencias Naturales, Universidad del Rosario, Bogotá, Colombia Icahn School of Medicine at Mount Sinai, New York, USA        | Nathalia Ballesteros et al    |
| EPI_ISL_941161 | Centro de Investigaciones en Microbiología y Biotecnología-UR (CIMBIUR), Facultad de Ciencias Naturales, Universidad del Rosario, Bogotá, Colombia | Centro de Investigaciones en Microbiología y Biotecnología-UR (CIMBIUR), Facultad de Ciencias Naturales, Universidad del Rosario, Bogotá, Colombia Icahn School of Medicine at Mount Sinai, New York, USA        | Nathalia Ballesteros et al    |
| EPI_ISL_526951 | Instituto Nacional de Salud, Bogotá, Colombia                                                                                                      | Instituto Nacional de Salud, Bogotá, Colombia                                                                                                                                                                    | Katherine Laiton-Donato et al |
| EPI_ISL_456144 | Instituto Nacional de Salud - Unidad de Secuenciación y Análisis Genómico                                                                          | Instituto Nacional de Salud, Universidad Cooperativa de Colombia, Instituto Alexander von Humboldt, Imperial College-London, London School of Hygiene & Tropical Medicine                                        | Katherine Laiton-Donato et al |
| EPI_ISL_526949 | Instituto Nacional de Salud, Bogotá, Colombia                                                                                                      | Instituto Nacional de Salud, Bogotá, Colombia                                                                                                                                                                    | Katherine Laiton-Donato et al |
| EPI_ISL_956297 | Instituto Nacional de Salud- Dirección de Redes de Laboratorios de Salud Pública                                                                   | Instituto Nacional de Salud- Dirección de Investigación en Salud Pública                                                                                                                                         | Katherine Laiton-Donato et al |
| EPI_ISL_956287 | Instituto Nacional de Salud- Dirección de Redes de Laboratorios de Salud Pública                                                                   | Instituto Nacional de Salud- Dirección de Investigación en Salud Pública                                                                                                                                         | Katherine Laiton-Donato et al |
| EPI_ISL_956288 | Instituto Nacional de Salud- Dirección de Redes de Laboratorios de Salud Pública                                                                   | Instituto Nacional de Salud- Dirección de Investigación en Salud Pública                                                                                                                                         | Katherine Laiton-Donato et al |
| EPI_ISL_956289 | Instituto Nacional de Salud- Dirección de Redes de Laboratorios de Salud Pública                                                                   | Instituto Nacional de Salud- Dirección de Investigación en Salud Pública                                                                                                                                         | Katherine Laiton-Donato et al |
| EPI_ISL_956290 | Instituto Nacional de Salud- Dirección de Redes de Laboratorios de Salud Pública                                                                   | Instituto Nacional de Salud- Dirección de Investigación en Salud Pública                                                                                                                                         | Katherine Laiton-Donato et al |
| EPI_ISL_956291 | Instituto Nacional de Salud- Dirección de Redes de Laboratorios de Salud Pública                                                                   | Instituto Nacional de Salud- Dirección de Investigación en Salud Pública                                                                                                                                         | Katherine Laiton-Donato et al |
| EPI_ISL_956292 | Instituto Nacional de Salud- Dirección de Redes de Laboratorios de Salud Pública                                                                   | Instituto Nacional de Salud- Dirección de Investigación en Salud Pública                                                                                                                                         | Katherine Laiton-Donato et al |
| EPI_ISL_956293 | Instituto Nacional de Salud- Dirección de Redes de Laboratorios de Salud Pública                                                                   | Instituto Nacional de Salud- Dirección de Investigación en Salud Pública                                                                                                                                         | Katherine Laiton-Donato et al |
| EPI_ISL_956294 | Instituto Nacional de Salud- Dirección de Redes de Laboratorios de Salud Pública                                                                   | Instituto Nacional de Salud- Dirección de Investigación en Salud Pública                                                                                                                                         | Katherine Laiton-Donato et al |
| EPI_ISL_956295 | Instituto Nacional de Salud- Dirección de Redes de Laboratorios de Salud Pública                                                                   | Instituto Nacional de Salud- Dirección de Investigación en Salud Pública                                                                                                                                         | Katherine Laiton-Donato et al |
| EPI_ISL_447761 | Instituto Nacional de Salud, Bogotá, Colombia                                                                                                      | Centro de Investigaciones Microbiológicas-UR (GIMUR), Departamento de Biología, Facultad de Ciencias Naturales, Universidad del Rosario, Bogotá, Colombia Icahn School of Medicine at Mount Sinai, New York, USA | Juan David Ramírez et al      |
| EPI_ISL_447763 | Instituto Nacional de Salud, Bogotá, Colombia                                                                                                      | Centro de Investigaciones Microbiológicas-UR (GIMUR), Departamento de Biología, Facultad de Ciencias Naturales, Universidad del Rosario, Bogotá, Colombia Icahn School of Medicine at Mount Sinai, New York, USA | Juan David Ramírez et al      |
| EPI_ISL_653756 | Instituto Nacional de Salud, Bogotá, Colombia                                                                                                      | Instituto Nacional de Salud, Bogotá, Colombia                                                                                                                                                                    | Katherine Laiton-Donato et al |
| EPI_ISL_739680 | Instituto Nacional de Salud, Bogotá, Colombia                                                                                                      | Instituto Nacional de Salud, Bogotá, Colombia                                                                                                                                                                    | Katherine Laiton-Donato et al |
| EPI_ISL_739675 | Instituto Nacional de Salud, Bogotá, Colombia                                                                                                      | Instituto Nacional de Salud, Bogotá, Colombia                                                                                                                                                                    | Katherine Laiton-Donato et al |
| EPI_ISL_739674 | Instituto Nacional de Salud, Bogotá, Colombia                                                                                                      | Instituto Nacional de Salud, Bogotá, Colombia                                                                                                                                                                    | Katherine Laiton-Donato et al |
| EPI_ISL_739677 | Instituto Nacional de Salud, Bogotá, Colombia                                                                                                      | Instituto Nacional de Salud, Bogotá, Colombia                                                                                                                                                                    | Katherine Laiton-Donato et al |
| EPI_ISL_739676 | Instituto Nacional de Salud, Bogotá, Colombia                                                                                                      | Instituto Nacional de Salud, Bogotá, Colombia                                                                                                                                                                    | Katherine Laiton-Donato et al |
| EPI_ISL_653758 | Instituto Nacional de Salud, Bogotá, Colombia                                                                                                      | Instituto Nacional de Salud, Bogotá, Colombia                                                                                                                                                                    | Katherine Laiton-Donato et al |
| EPI_ISL_794666 | SYNLAB REGIONAL NOROCCIDENTE                                                                                                                       | Instituto Nacional de Salud - Dirección de Investigación en Salud Pública                                                                                                                                        | Katherine Laiton-Donato et al |
| EPI_ISL_794667 | SYNLAB REGIONAL NOROCCIDENTE                                                                                                                       | Instituto Nacional de Salud - Dirección de Investigación en Salud Pública                                                                                                                                        | Katherine Laiton-Donato et al |
| EPI_ISL_956300 | Laboratorio de salud publica Arauca                                                                                                                | Instituto Nacional de Salud- Dirección de Investigación en Salud Pública                                                                                                                                         | Katherine Laiton-Donato et al |

|                |                                                                                                                                                          |                                                                                                                                                                           |                               |
|----------------|----------------------------------------------------------------------------------------------------------------------------------------------------------|---------------------------------------------------------------------------------------------------------------------------------------------------------------------------|-------------------------------|
| EPI_ISL_653761 | Instituto Nacional de Salud, Bogotá, Colombia                                                                                                            | Instituto Nacional de Salud, Bogotá, Colombia                                                                                                                             | Katherine Laiton-Donato et al |
| EPI_ISL_653759 | Instituto Nacional de Salud, Bogotá, Colombia                                                                                                            | Instituto Nacional de Salud, Bogotá, Colombia                                                                                                                             | Katherine Laiton-Donato et al |
| EPI_ISL_653760 | Instituto Nacional de Salud, Bogotá, Colombia                                                                                                            | Instituto Nacional de Salud, Bogotá, Colombia                                                                                                                             | Katherine Laiton-Donato et al |
| EPI_ISL_653762 | Instituto Nacional de Salud, Bogotá, Colombia                                                                                                            | Instituto Nacional de Salud, Bogotá, Colombia                                                                                                                             | Katherine Laiton-Donato et al |
| EPI_ISL_845638 | Laboratorio de Salud Pública - Secretaría Distrital de Salud                                                                                             | Instituto Nacional de Salud - Dirección de Investigación en Salud Pública                                                                                                 | Katherine Laiton-Donato et al |
| EPI_ISL_845640 | Laboratorio de Salud Pública - Secretaría Distrital de Salud                                                                                             | Instituto Nacional de Salud - Dirección de Investigación en Salud Pública                                                                                                 | Katherine Laiton-Donato et al |
| EPI_ISL_845641 | Laboratorio de Salud Pública - Secretaría Distrital de Salud                                                                                             | Instituto Nacional de Salud - Dirección de Investigación en Salud Pública                                                                                                 | Katherine Laiton-Donato et al |
| EPI_ISL_845620 | compensar calle 63                                                                                                                                       | Instituto Nacional de Salud - Dirección de Investigación en Salud Pública                                                                                                 | Katherine Laiton-Donato et al |
| EPI_ISL_845621 | Dirección de Sanidad Ejército                                                                                                                            | Instituto Nacional de Salud - Dirección de Investigación en Salud Pública                                                                                                 | Katherine Laiton-Donato et al |
| EPI_ISL_845623 | Dirección de Sanidad Ejército                                                                                                                            | Instituto Nacional de Salud - Dirección de Investigación en Salud Pública                                                                                                 | Katherine Laiton-Donato et al |
| EPI_ISL_845627 | SYNLAB COLOMBIA S.A.S                                                                                                                                    | Instituto Nacional de Salud - Dirección de Investigación en Salud Pública                                                                                                 | Katherine Laiton-Donato et al |
| EPI_ISL_456121 | Instituto Nacional de Salud - Unidad de Secuenciación y Análisis Genómico                                                                                | Instituto Nacional de Salud, Universidad Cooperativa de Colombia, Instituto Alexander von Humboldt, Imperial College-London, London School of Hygiene & Tropical Medicine | Katherine Laiton-Donato et al |
| EPI_ISL_498161 | Instituto Nacional de Salud, Bogotá, Colombia                                                                                                            | Instituto de Investigaciones Microbiológicas-UR (GIMUR), Departamento de Biología, Facultad de Ciencias Naturales, Universidad del Rosario, Bogotá, Colombia              | Katherine Laiton-Donato et al |
| EPI_ISL_447738 | Grupo de Investigaciones Microbiológicas-UR (GIMUR), Departamento de Biología, Facultad de Ciencias Naturales, Universidad del Rosario, Bogotá, Colombia | Instituto Nacional de Salud, Colombia Icahn School of Medicine at Mount Sinai, New York, USA                                                                              | Juan David Ramírez et al      |
| EPI_ISL_447739 | Grupo de Investigaciones Microbiológicas-UR (GIMUR), Departamento de Biología, Facultad de Ciencias Naturales, Universidad del Rosario, Bogotá, Colombia | Instituto Nacional de Salud, Colombia Icahn School of Medicine at Mount Sinai, New York, USA                                                                              | Juan David Ramírez et al      |
| EPI_ISL_447740 | Grupo de Investigaciones Microbiológicas-UR (GIMUR), Departamento de Biología, Facultad de Ciencias Naturales, Universidad del Rosario, Bogotá, Colombia | Instituto Nacional de Salud, Colombia Icahn School of Medicine at Mount Sinai, New York, USA                                                                              | Juan David Ramírez et al      |
| EPI_ISL_447741 | Grupo de Investigaciones Microbiológicas-UR (GIMUR), Departamento de Biología, Facultad de Ciencias Naturales, Universidad del Rosario, Bogotá, Colombia | Instituto Nacional de Salud, Colombia Icahn School of Medicine at Mount Sinai, New York, USA                                                                              | Juan David Ramírez et al      |
| EPI_ISL_447742 | Grupo de Investigaciones Microbiológicas-UR (GIMUR), Departamento de Biología, Facultad de Ciencias Naturales, Universidad del Rosario, Bogotá, Colombia | Instituto Nacional de Salud, Colombia Icahn School of Medicine at Mount Sinai, New York, USA                                                                              | Juan David Ramírez et al      |
| EPI_ISL_498157 | Instituto Nacional de Salud, Bogotá, Colombia                                                                                                            | Instituto Nacional de Salud, Bogotá, Colombia                                                                                                                             | Katherine Laiton-Donato et al |
| EPI_ISL_498158 | Instituto Nacional de Salud, Bogotá, Colombia                                                                                                            | Instituto Nacional de Salud, Bogotá, Colombia                                                                                                                             | Katherine Laiton-Donato et al |
| EPI_ISL_794663 | Carvajal Laboratorios                                                                                                                                    | Instituto Nacional de Salud - Dirección de Investigación en Salud Pública                                                                                                 | Katherine Laiton-Donato et al |
| EPI_ISL_447734 | Grupo de Investigaciones Microbiológicas-UR (GIMUR), Departamento de Biología, Facultad de Ciencias Naturales, Universidad del Rosario, Bogotá, Colombia | Instituto Nacional de Salud, Colombia Icahn School of Medicine at Mount Sinai, New York, USA                                                                              | Juan David Ramírez et al      |
| EPI_ISL_739672 | Instituto Nacional de Salud, Bogotá, Colombia                                                                                                            | Instituto Nacional de Salud, Bogotá, Colombia                                                                                                                             | Katherine Laiton-Donato et al |
| EPI_ISL_498159 | Instituto Nacional de Salud, Bogotá, Colombia                                                                                                            | Instituto Nacional de Salud, Bogotá, Colombia                                                                                                                             | Katherine Laiton-Donato et al |
| EPI_ISL_498153 | Instituto Nacional de Salud, Bogotá, Colombia                                                                                                            | Instituto Nacional de Salud, Bogotá, Colombia                                                                                                                             | Katherine Laiton-Donato et al |
| EPI_ISL_498160 | Instituto Nacional de Salud, Bogotá, Colombia                                                                                                            | Instituto Nacional de Salud, Bogotá, Colombia                                                                                                                             | Katherine Laiton-Donato et al |

|                |                                                                                                                                                          |                                                                                                                                                                                                                                                               |                               |
|----------------|----------------------------------------------------------------------------------------------------------------------------------------------------------|---------------------------------------------------------------------------------------------------------------------------------------------------------------------------------------------------------------------------------------------------------------|-------------------------------|
| EPI_ISL_447816 | Instituto Nacional de Salud, Bogotá, Colombia                                                                                                            | Grupo de Investigaciones Microbiológicas-UR (GIMUR), Departamento de Biología, Facultad de Ciencias Naturales, Universidad del Rosario, Bogotá, Colombia Instituto Nacional de Salud, Bogotá, Colombia Icahn School of Medicine at Mount Sinai, New York, USA | Juan David Ramírez et al      |
| EPI_ISL_498163 | Instituto Nacional de Salud, Bogotá, Colombia                                                                                                            | Grupo de Investigaciones Microbiológicas-UR (GIMUR), Departamento de Biología, Facultad de Ciencias Naturales, Universidad del Rosario, Bogotá, Colombia Instituto Nacional de Salud, Bogotá, Colombia Icahn School of Medicine at Mount Sinai, New York, USA | Katherine Laiton-Donato et al |
| EPI_ISL_447744 | Grupo de Investigaciones Microbiológicas-UR (GIMUR), Departamento de Biología, Facultad de Ciencias Naturales, Universidad del Rosario, Bogotá, Colombia | Grupo de Investigaciones Microbiológicas-UR (GIMUR), Departamento de Biología, Facultad de Ciencias Naturales, Universidad del Rosario, Bogotá, Colombia Instituto Nacional de Salud, Bogotá, Colombia Icahn School of Medicine at Mount Sinai, New York, USA | Juan David Ramírez et al      |
| EPI_ISL_447800 | Instituto Nacional de Salud, Bogotá, Colombia                                                                                                            | Grupo de Investigaciones Microbiológicas-UR (GIMUR), Departamento de Biología, Facultad de Ciencias Naturales, Universidad del Rosario, Bogotá, Colombia Instituto Nacional de Salud, Bogotá, Colombia Icahn School of Medicine at Mount Sinai, New York, USA | Juan David Ramírez et al      |
| EPI_ISL_447812 | Instituto Nacional de Salud, Bogotá, Colombia                                                                                                            | Instituto Nacional de Salud, Bogotá, Colombia                                                                                                                                                                                                                 | Juan David Ramírez et al      |
| EPI_ISL_498167 | Instituto Nacional de Salud, Bogotá, Colombia                                                                                                            | Instituto Nacional de Salud, Bogotá, Colombia                                                                                                                                                                                                                 | Katherine Laiton-Donato et al |
| EPI_ISL_526969 | Instituto Nacional de Salud, Bogotá, Colombia                                                                                                            | Instituto Nacional de Salud, Bogotá, Colombia                                                                                                                                                                                                                 | Katherine Laiton-Donato et al |
| EPI_ISL_526971 | Instituto Nacional de Salud, Bogotá, Colombia                                                                                                            | Instituto Nacional de Salud, Bogotá, Colombia                                                                                                                                                                                                                 | Katherine Laiton-Donato et al |
| EPI_ISL_653745 | Instituto Nacional de Salud, Bogotá, Colombia                                                                                                            | Instituto Nacional de Salud, Bogotá, Colombia                                                                                                                                                                                                                 | Katherine Laiton-Donato et al |
| EPI_ISL_653746 | Instituto Nacional de Salud, Bogotá, Colombia                                                                                                            | Instituto Nacional de Salud, Bogotá, Colombia                                                                                                                                                                                                                 | Katherine Laiton-Donato et al |
| EPI_ISL_653747 | Instituto Nacional de Salud, Bogotá, Colombia                                                                                                            | Instituto Nacional de Salud, Bogotá, Colombia                                                                                                                                                                                                                 | Katherine Laiton-Donato et al |
| EPI_ISL_526967 | Instituto Nacional de Salud, Bogotá, Colombia                                                                                                            | Instituto Nacional de Salud, Bogotá, Colombia                                                                                                                                                                                                                 | Katherine Laiton-Donato et al |
| EPI_ISL_653754 | Instituto Nacional de Salud, Bogotá, Colombia                                                                                                            | Instituto Nacional de Salud, Bogotá, Colombia                                                                                                                                                                                                                 | Katherine Laiton-Donato et al |
| EPI_ISL_739671 | Instituto Nacional de Salud, Bogotá, Colombia                                                                                                            | Instituto Nacional de Salud, Bogotá, Colombia                                                                                                                                                                                                                 | Katherine Laiton-Donato et al |
| EPI_ISL_739673 | Instituto Nacional de Salud, Bogotá, Colombia                                                                                                            | Instituto Nacional de Salud, Bogotá, Colombia                                                                                                                                                                                                                 | Katherine Laiton-Donato et al |
| EPI_ISL_653750 | Instituto Nacional de Salud, Bogotá, Colombia                                                                                                            | Instituto Nacional de Salud, Bogotá, Colombia                                                                                                                                                                                                                 | Katherine Laiton-Donato et al |
| EPI_ISL_791084 | Instituto Nacional de Salud - Unidad de Secuenciación y Análisis Genómico                                                                                | Instituto Nacional de Salud - Dirección de Investigación en Salud Pública                                                                                                                                                                                     | Katherine Laiton-Donato et al |
| EPI_ISL_956304 | ESE INSTITUTO NACIONAL DE CANCEROLOGIA                                                                                                                   | Instituto Nacional de Salud- Dirección de Investigación en Salud Pública                                                                                                                                                                                      | Katherine Laiton-Donato et al |
| EPI_ISL_956305 | ESE INSTITUTO NACIONAL DE CANCEROLOGIA                                                                                                                   | Centro de Investigaciones en Microbiología y Biotecnología-UR (CIMBIUR), Facultad de Ciencias Naturales, Universidad del Rosario, Bogotá, Colombia                                                                                                            | Katherine Laiton-Donato et al |
| EPI_ISL_941996 | Centro de Investigaciones en Microbiología y Biotecnología-UR (CIMBIUR), Facultad de Ciencias Naturales, Universidad del Rosario, Bogotá, Colombia       | Centro de Investigaciones en Microbiología y Biotecnología-UR (CIMBIUR), Facultad de Ciencias Naturales, Universidad del Rosario, Bogotá, Colombia Instituto Nacional de Salud, Bogotá, Colombia Icahn School of Medicine at Mount Sinai, New York, USA       | Luz Helena Patiño et al       |
| EPI_ISL_942004 | Centro de Investigaciones en Microbiología y Biotecnología-UR (CIMBIUR), Facultad de Ciencias Naturales, Universidad del Rosario, Bogotá, Colombia       | Centro de Investigaciones en Microbiología y Biotecnología-UR (CIMBIUR), Facultad de Ciencias Naturales, Universidad del Rosario, Bogotá, Colombia Instituto Nacional de Salud, Bogotá, Colombia Icahn School of Medicine at Mount Sinai, New York, USA       | Luz Helena Patiño et al       |
| EPI_ISL_941997 | Centro de Investigaciones en Microbiología y Biotecnología-UR (CIMBIUR), Facultad de Ciencias Naturales, Universidad del Rosario, Bogotá, Colombia       | Centro de Investigaciones en Microbiología y Biotecnología-UR (CIMBIUR), Facultad de Ciencias Naturales, Universidad del Rosario, Bogotá, Colombia Instituto Nacional de Salud, Bogotá, Colombia Icahn School of Medicine at Mount Sinai, New York, USA       | Luz Helena Patiño et al       |
| EPI_ISL_941998 | Centro de Investigaciones en Microbiología y Biotecnología-UR (CIMBIUR), Facultad de Ciencias Naturales, Universidad del Rosario, Bogotá, Colombia       | Centro de Investigaciones en Microbiología y Biotecnología-UR (CIMBIUR), Facultad de Ciencias Naturales, Universidad del Rosario, Bogotá, Colombia Instituto Nacional de Salud, Bogotá, Colombia Icahn School of Medicine at Mount Sinai, New York, USA       | Luz Helena Patiño et al       |



|                |                                                                           |                                                                                                                                                                                                                                                            |                               |
|----------------|---------------------------------------------------------------------------|------------------------------------------------------------------------------------------------------------------------------------------------------------------------------------------------------------------------------------------------------------|-------------------------------|
| EPI_ISL_942003 | Instituto Nacional de Salud, Bogotá, Colombia                             | Centro de Investigaciones en Microbiología y Biotecnología-UR (CIMBIUR), Facultad de Ciencias Naturales, Universidad del Rosario, Bogotá, Colombia Instituto Nacional de Salud, Bogotá, Colombia Icahn School of Medicine at Mount Sinai, New York, USA    | Luz Helena Patiño et al       |
| EPI_ISL_941994 | Instituto Nacional de Salud, Bogotá, Colombia                             | Centro de Investigaciones en Microbiología y Biotecnología-UR (CIMBIUR), Facultad de Ciencias Naturales, Universidad del Rosario, Bogotá, Colombia Instituto Nacional de Salud, Bogotá, Colombia Icahn School of Medicine at Mount Sinai, New York, USA    | Luz Helena Patiño et al       |
| EPI_ISL_941951 | Instituto Nacional de Salud, Bogotá, Colombia                             | Centro de Investigaciones en Microbiología y Biotecnología-UR (CIMBIUR), Facultad de Ciencias Naturales, Universidad del Rosario, Bogotá, Colombia Instituto Nacional de Salud, Bogotá, Colombia Icahn School of Medicine at Mount Sinai, New York, USA    | Luz Helena Patiño et al       |
| EPI_ISL_526958 | Instituto Nacional de Salud, Bogotá, Colombia                             | Grupo de Investigaciones Microbiológicas (GIMUR), Departamento de Biología, Facultad de Ciencias Naturales, Universidad del Rosario, Bogotá, Colombia Instituto Nacional de Salud, Bogotá, Colombia Icahn School of Medicine at Mount Sinai, New York, USA | Katherine Laiton-Donato et al |
| EPI_ISL_447777 | Instituto Nacional de Salud, Bogotá, Colombia                             | Instituto Nacional de Salud, Universidad Cooperativa de Colombia, Instituto Alexander von Humboldt, Imperial College-London, London School of Hygiene & Tropical Medicine                                                                                  | Juan David Ramírez et al      |
| EPI_ISL_456153 | Instituto Nacional de Salud - Unidad de Secuenciación y Análisis Genómico | Instituto Nacional de Salud, Universidad Cooperativa de Colombia, Instituto Alexander von Humboldt, Imperial College-London, London School of Hygiene & Tropical Medicine                                                                                  | Katherine Laiton-Donato et al |
| EPI_ISL_456125 | Instituto Nacional de Salud - Unidad de Secuenciación y Análisis Genómico | Instituto Nacional de Salud, Bogotá, Colombia                                                                                                                                                                                                              | Katherine Laiton-Donato et al |
| EPI_ISL_498166 | Instituto Nacional de Salud, Bogotá, Colombia                             | Instituto Nacional de Salud- Dirección de Investigación en Salud Pública, Universidad de los Andes- Applied genomics research group, Vicerrectoría de Investigación y Creación, Universidad de los Andes- Systems and Computing Engineering Department     | Katherine Laiton-Donato et al |
| EPI_ISL_906535 | HOSPITAL DEPARTAMENTAL DE VILLAVICENCIO E.S.E.                            | Instituto Nacional de Salud, Bogotá, Colombia                                                                                                                                                                                                              | Katherine Laiton-Donato et al |
| EPI_ISL_498162 | Instituto Nacional de Salud, Bogotá, Colombia                             | Instituto Nacional de Salud - Dirección de Investigación en Salud Pública                                                                                                                                                                                  | Katherine Laiton-Donato et al |
| EPI_ISL_791093 | Instituto Nacional de Salud - Unidad de Secuenciación y Análisis Genómico | Instituto Nacional de Salud - Dirección de Investigación en Salud Pública                                                                                                                                                                                  | Katherine Laiton-Donato et al |
| EPI_ISL_791094 | Instituto Nacional de Salud - Unidad de Secuenciación y Análisis Genómico | Instituto Nacional de Salud- Dirección de Investigación en Salud Pública, Universidad de los Andes- Gencore                                                                                                                                                | Katherine Laiton-Donato et al |
| EPI_ISL_956306 | Laboratorio Gencore- Universidad de los Andes                             | Instituto Nacional de Salud, Bogotá, Colombia                                                                                                                                                                                                              | Katherine Laiton-Donato et al |
| EPI_ISL_497744 | Instituto Nacional de Salud, Bogotá, Colombia                             | Instituto Nacional de Salud, Universidad Cooperativa de Colombia, Instituto Alexander von Humboldt, Imperial College-London, London School of Hygiene & Tropical Medicine                                                                                  | Katherine Laiton-Donato et al |
| EPI_ISL_456155 | Instituto Nacional de Salud - Unidad de Secuenciación y Análisis Genómico | Grupo de Investigaciones Microbiológicas (GIMUR), Departamento de Biología, Facultad de Ciencias Naturales, Universidad del Rosario, Bogotá, Colombia Instituto Nacional de Salud, Bogotá, Colombia Icahn School of Medicine at Mount Sinai, New York, USA | Katherine Laiton-Donato et al |
| EPI_ISL_739663 | Instituto Nacional de Salud, Bogotá, Colombia                             | Grupo de Investigaciones Microbiológicas (GIMUR), Departamento de Biología, Facultad de Ciencias Naturales, Universidad del Rosario, Bogotá, Colombia Instituto Nacional de Salud, Bogotá, Colombia Icahn School of Medicine at Mount Sinai, New York, USA | Katherine Laiton-Donato et al |
| EPI_ISL_447756 | Instituto Nacional de Salud, Bogotá, Colombia                             | Grupo de Investigaciones Microbiológicas (GIMUR), Departamento de Biología, Facultad de Ciencias Naturales, Universidad del Rosario, Bogotá, Colombia Instituto Nacional de Salud, Bogotá, Colombia Icahn School of Medicine at Mount Sinai, New York, USA | Juan David Ramírez et al      |
| EPI_ISL_447814 | Instituto Nacional de Salud, Bogotá, Colombia                             | Instituto Nacional de Salud, Universidad Cooperativa de Colombia, Instituto Alexander von Humboldt, Imperial College-London, London School of Hygiene & Tropical Medicine                                                                                  | Juan David Ramírez et al      |
| EPI_ISL_456151 | Instituto Nacional de Salud - Unidad de Secuenciación y Análisis Genómico | Instituto Nacional de Salud, Universidad Cooperativa de Colombia, Instituto Alexander von Humboldt, Imperial College-London, London School of Hygiene & Tropical Medicine                                                                                  | Katherine Laiton-Donato et al |

|                |                                                                                  |                                                                                                                                                                                                                                                        |                               |
|----------------|----------------------------------------------------------------------------------|--------------------------------------------------------------------------------------------------------------------------------------------------------------------------------------------------------------------------------------------------------|-------------------------------|
| EPI_ISL_653751 | Instituto Nacional de Salud, Bogotá, Colombia                                    | Instituto Nacional de Salud, Bogotá, Colombia                                                                                                                                                                                                          | Katherine Laiton-Donato et al |
| EPI_ISL_906531 | Laboratorio de salud publica del Valle del Cauca                                 | Instituto Nacional de Salud- Dirección de Investigación en Salud Pública, Universidad de los Andes- Applied genomics research group, Vicerrectoria de Investigación y Creación, Universidad de los Andes- Systems and Computing Engineering Department | Katherine Laiton-Donato et al |
| EPI_ISL_956298 | Laboratorio de salud publica del Valle del Cauca                                 | Instituto Nacional de Salud - Dirección de Investigación en Salud Pública                                                                                                                                                                              | Katherine Laiton-Donato et al |
| EPI_ISL_794654 | Fundación Valle del Lili                                                         | Instituto Nacional de Salud - Dirección de Investigación en Salud Pública                                                                                                                                                                              | Katherine Laiton-Donato et al |
| EPI_ISL_956284 | Instituto Nacional de Salud- Dirección de Redes de Laboratorios de Salud Pública | Instituto Nacional de Salud- Dirección de Investigación en Salud Pública                                                                                                                                                                               | Katherine Laiton-Donato et al |
| EPI_ISL_956285 | Instituto Nacional de Salud- Dirección de Redes de Laboratorios de Salud Pública | Instituto Nacional de Salud- Dirección de Investigación en Salud Pública                                                                                                                                                                               | Katherine Laiton-Donato et al |
| EPI_ISL_956286 | Instituto Nacional de Salud- Dirección de Redes de Laboratorios de Salud Pública | Instituto Nacional de Salud- Dirección de Investigación en Salud Pública                                                                                                                                                                               | Katherine Laiton-Donato et al |
| EPI_ISL_912358 | Fondation Congolaise pour la recherche medicale (FCRM), Francine Ntoumi          | NGS Competence Center Tuebingen, Institut für Medizinische Mikrobiologie und Hygiene, Universitaetsklinikum Tübingen                                                                                                                                   | Angel Angelov et al           |
| EPI_ISL_912359 | Fondation Congolaise pour la recherche medicale (FCRM), Francine Ntoumi          | NGS Competence Center Tuebingen, Institut für Medizinische Mikrobiologie und Hygiene, Universitaetsklinikum Tübingen                                                                                                                                   | Angel Angelov et al           |
| EPI_ISL_912360 | Fondation Congolaise pour la recherche medicale (FCRM), Francine Ntoumi          | NGS Competence Center Tuebingen, Institut für Medizinische Mikrobiologie und Hygiene, Universitaetsklinikum Tübingen                                                                                                                                   | Angel Angelov et al           |
| EPI_ISL_912365 | Fondation Congolaise pour la recherche medicale (FCRM), Francine Ntoumi          | NGS Competence Center Tuebingen, Institut für Medizinische Mikrobiologie und Hygiene, Universitaetsklinikum Tübingen                                                                                                                                   | Angel Angelov et al           |
| EPI_ISL_912366 | Fondation Congolaise pour la recherche medicale (FCRM), Francine Ntoumi          | NGS Competence Center Tuebingen, Institut für Medizinische Mikrobiologie und Hygiene, Universitaetsklinikum Tübingen                                                                                                                                   | Angel Angelov et al           |
| EPI_ISL_912367 | Fondation Congolaise pour la recherche medicale (FCRM), Francine Ntoumi          | NGS Competence Center Tuebingen, Institut für Medizinische Mikrobiologie und Hygiene, Universitaetsklinikum Tübingen                                                                                                                                   | Angel Angelov et al           |
| EPI_ISL_912368 | Fondation Congolaise pour la recherche medicale (FCRM), Francine Ntoumi          | NGS Competence Center Tuebingen, Institut für Medizinische Mikrobiologie und Hygiene, Universitaetsklinikum Tübingen                                                                                                                                   | Angel Angelov et al           |
| EPI_ISL_912369 | Fondation Congolaise pour la recherche medicale (FCRM), Francine Ntoumi          | NGS Competence Center Tuebingen, Institut für Medizinische Mikrobiologie und Hygiene, Universitaetsklinikum Tübingen                                                                                                                                   | Angel Angelov et al           |
| EPI_ISL_912370 | Fondation Congolaise pour la recherche medicale (FCRM), Francine Ntoumi          | NGS Competence Center Tuebingen, Institut für Medizinische Mikrobiologie und Hygiene, Universitaetsklinikum Tübingen                                                                                                                                   | Angel Angelov et al           |
| EPI_ISL_912371 | Fondation Congolaise pour la recherche medicale (FCRM), Francine Ntoumi          | NGS Competence Center Tuebingen, Institut für Medizinische Mikrobiologie und Hygiene, Universitaetsklinikum Tübingen                                                                                                                                   | Angel Angelov et al           |
| EPI_ISL_912372 | Fondation Congolaise pour la recherche medicale (FCRM), Francine Ntoumi          | NGS Competence Center Tuebingen, Institut für Medizinische Mikrobiologie und Hygiene, Universitaetsklinikum Tübingen                                                                                                                                   | Angel Angelov et al           |
| EPI_ISL_912373 | Fondation Congolaise pour la recherche medicale (FCRM), Francine Ntoumi          | NGS Competence Center Tuebingen, Institut für Medizinische Mikrobiologie und Hygiene, Universitaetsklinikum Tübingen                                                                                                                                   | Angel Angelov et al           |
| EPI_ISL_912375 | Fondation Congolaise pour la recherche medicale (FCRM), Francine Ntoumi          | NGS Competence Center Tuebingen, Institut für Medizinische Mikrobiologie und Hygiene, Universitaetsklinikum Tübingen                                                                                                                                   | Angel Angelov et al           |
| EPI_ISL_912376 | Fondation Congolaise pour la recherche medicale (FCRM), Francine Ntoumi          | NGS Competence Center Tuebingen, Institut für Medizinische Mikrobiologie und Hygiene, Universitaetsklinikum Tübingen                                                                                                                                   | Angel Angelov et al           |
| EPI_ISL_912377 | Fondation Congolaise pour la recherche medicale (FCRM), Francine Ntoumi          | NGS Competence Center Tuebingen, Institut für Medizinische Mikrobiologie und Hygiene, Universitaetsklinikum Tübingen                                                                                                                                   | Angel Angelov et al           |
| EPI_ISL_912378 | Fondation Congolaise pour la recherche medicale (FCRM), Francine Ntoumi          | NGS Competence Center Tuebingen, Institut für Medizinische Mikrobiologie und Hygiene, Universitaetsklinikum Tübingen                                                                                                                                   | Angel Angelov et al           |
| EPI_ISL_912380 | Fondation Congolaise pour la recherche medicale (FCRM), Francine Ntoumi          | NGS Competence Center Tuebingen, Institut für Medizinische Mikrobiologie und Hygiene, Universitaetsklinikum Tübingen                                                                                                                                   | Angel Angelov et al           |
| EPI_ISL_912381 | Fondation Congolaise pour la recherche medicale (FCRM), Francine Ntoumi          | NGS Competence Center Tuebingen, Institut für Medizinische Mikrobiologie und Hygiene, Universitaetsklinikum Tübingen                                                                                                                                   | Angel Angelov et al           |
| EPI_ISL_912387 | Fondation Congolaise pour la recherche medicale (FCRM), Francine Ntoumi          | NGS Competence Center Tuebingen, Institut für Medizinische Mikrobiologie und Hygiene, Universitaetsklinikum Tübingen                                                                                                                                   | Angel Angelov et al           |

|                |                                                                                |                                                                                                                      |                           |
|----------------|--------------------------------------------------------------------------------|----------------------------------------------------------------------------------------------------------------------|---------------------------|
| EPI_ISL_912388 | Fondation Congolaise pour la recherche medicale (FCRM), Francine Ntoumi        | NGS Competence Center Tuebingen, Institut für Medizinische Mikrobiologie und Hygiene, Universitaetsklinikum Tübingen | Angel Angelov et al       |
| EPI_ISL_912389 | Fondation Congolaise pour la recherche medicale (FCRM), Francine Ntoumi        | NGS Competence Center Tuebingen, Institut für Medizinische Mikrobiologie und Hygiene, Universitaetsklinikum Tübingen | Angel Angelov et al       |
| EPI_ISL_912390 | Fondation Congolaise pour la recherche medicale (FCRM), Francine Ntoumi        | NGS Competence Center Tuebingen, Institut für Medizinische Mikrobiologie und Hygiene, Universitaetsklinikum Tübingen | Angel Angelov et al       |
| EPI_ISL_912394 | Fondation Congolaise pour la recherche medicale (FCRM), Francine Ntoumi        | NGS Competence Center Tuebingen, Institut für Medizinische Mikrobiologie und Hygiene, Universitaetsklinikum Tübingen | Angel Angelov et al       |
| EPI_ISL_581487 | Fondation Congolaise pour la recherche medicale (FCRM)                         | NGS Competence Center Tübingen, Institut für Medizinische Mikrobiologie und Hygiene, Universitätsklinikum Tübingen   | Angel Angelov et al       |
| EPI_ISL_581489 | Fondation Congolaise pour la recherche medicale (FCRM)                         | NGS Competence Center Tübingen, Institut für Medizinische Mikrobiologie und Hygiene, Universitätsklinikum Tübingen   | Angel Angelov et al       |
| EPI_ISL_581455 | Fondation Congolaise pour la recherche medicale (FCRM)                         | NGS Competence Center Tübingen, Institut für Medizinische Mikrobiologie und Hygiene, Universitätsklinikum Tübingen   | Angel Angelov et al       |
| EPI_ISL_581490 | Fondation Congolaise pour la recherche medicale (FCRM)                         | NGS Competence Center Tübingen, Institut für Medizinische Mikrobiologie und Hygiene, Universitätsklinikum Tübingen   | Angel Angelov et al       |
| EPI_ISL_581491 | Fondation Congolaise pour la recherche medicale (FCRM)                         | NGS Competence Center Tübingen, Institut für Medizinische Mikrobiologie und Hygiene, Universitätsklinikum Tübingen   | Angel Angelov et al       |
| EPI_ISL_581492 | Fondation Congolaise pour la recherche medicale (FCRM)                         | NGS Competence Center Tübingen, Institut für Medizinische Mikrobiologie und Hygiene, Universitätsklinikum Tübingen   | Angel Angelov et al       |
| EPI_ISL_581493 | Fondation Congolaise pour la recherche medicale (FCRM)                         | NGS Competence Center Tübingen, Institut für Medizinische Mikrobiologie und Hygiene, Universitätsklinikum Tübingen   | Angel Angelov et al       |
| EPI_ISL_434538 | COOPESAIN                                                                      | Incienza, Instituto Costarricense de Investigación y Enseñanza en Nutrición y Salud                                  | Francisco Duarte et al    |
| EPI_ISL_480321 | Laboratorio Clínico San José                                                   | Charité Virology-University of Costa Rica                                                                            | Andres Moreira-Soto et al |
| EPI_ISL_480322 | Hospital Nacional de Niños                                                     | Charité Virology-University of Costa Rica                                                                            | Andres Moreira-Soto et al |
| EPI_ISL_480324 | Hospital Nacional de Niños                                                     | Charité Virology-University of Costa Rica                                                                            | Andres Moreira-Soto et al |
| EPI_ISL_480326 | Hospital Nacional de Niños                                                     | Charité Virology-University of Costa Rica                                                                            | Andres Moreira-Soto et al |
| EPI_ISL_480327 | Hospital Nacional de Niños                                                     | Charité Virology-University of Costa Rica                                                                            | Andres Moreira-Soto et al |
| EPI_ISL_480328 | Laboratorio LABIN                                                              | Charité Virology-University of Costa Rica                                                                            | Andres Moreira-Soto et al |
| EPI_ISL_491437 | Area de Salud Escazu (Coopesana)                                               | Incienza, Instituto Costarricense de Investigación y Enseñanza en Nutrición y Salud                                  | Francisco Duarte et al    |
| EPI_ISL_491447 | Hospital Fernando Escalante Pradilla                                           | Incienza, Instituto Costarricense de Investigación y Enseñanza en Nutrición y Salud                                  | Francisco Duarte et al    |
| EPI_ISL_491452 | Hospital San Rafael de Alajuela                                                | Incienza, Instituto Costarricense de Investigación y Enseñanza en Nutrición y Salud                                  | Francisco Duarte et al    |
| EPI_ISL_491455 | Hospital Clinica Biblica                                                       | Incienza, Instituto Costarricense de Investigación y Enseñanza en Nutrición y Salud                                  | Francisco Duarte et al    |
| EPI_ISL_491457 | Area de Salud Los Santos                                                       | Incienza, Instituto Costarricense de Investigación y Enseñanza en Nutrición y Salud                                  | Francisco Duarte et al    |
| EPI_ISL_512654 | Hospital Dr. Rafael A. Calderon Guardia [San Jose/San Jose]                    | Incienza, Instituto Costarricense de Investigación y Enseñanza en Nutrición y Salud                                  | Francisco Duarte et al    |
| EPI_ISL_512655 | Hospital De Niños Dr. Carlos Saenz Herrera [San Jose/San Jose]                 | Incienza, Instituto Costarricense de Investigación y Enseñanza en Nutrición y Salud                                  | Francisco Duarte et al    |
| EPI_ISL_512657 | Area De Salud Tibas-Uruca-Merced - Clinica Dr. Clorito Picado [Tibas/San Jose] | Incienza, Instituto Costarricense de Investigación y Enseñanza en Nutrición y Salud                                  | Francisco Duarte et al    |
| EPI_ISL_512660 | Area De Salud Los Chiles                                                       | Incienza, Instituto Costarricense de Investigación y Enseñanza en Nutrición y Salud                                  | Francisco Duarte et al    |
| EPI_ISL_512661 | Area De Salud Los Chiles                                                       | Incienza, Instituto Costarricense de Investigación y Enseñanza en Nutrición y Salud                                  | Francisco Duarte et al    |



|                |                                                                 |                                                                                     |                        |
|----------------|-----------------------------------------------------------------|-------------------------------------------------------------------------------------|------------------------|
| EPI_ISL_512662 | Area De Salud La Cruz                                           | Incienza, Instituto Costarricense de Investigación y Enseñanza en Nutrición y Salud | Francisco Duarte et al |
| EPI_ISL_512664 | Area De Salud Alajuela Norte - Clinica Dr. Marcial Rodriguez    | Incienza, Instituto Costarricense de Investigación y Enseñanza en Nutrición y Salud | Francisco Duarte et al |
| EPI_ISL_512666 | Area De Salud La Cruz                                           | Incienza, Instituto Costarricense de Investigación y Enseñanza en Nutrición y Salud | Francisco Duarte et al |
| EPI_ISL_512667 | Area De Salud La Cruz                                           | Incienza, Instituto Costarricense de Investigación y Enseñanza en Nutrición y Salud | Francisco Duarte et al |
| EPI_ISL_512668 | Area De Salud Corredores                                        | Incienza, Instituto Costarricense de Investigación y Enseñanza en Nutrición y Salud | Francisco Duarte et al |
| EPI_ISL_512669 | Area De Salud Alajuela Norte - Clinica Dr. Marcial Rodriguez    | Incienza, Instituto Costarricense de Investigación y Enseñanza en Nutrición y Salud | Francisco Duarte et al |
| EPI_ISL_512670 | Centro Nacional De Rehabilitacion Humberto Araya Rojas (Cenare) | Incienza, Instituto Costarricense de Investigación y Enseñanza en Nutrición y Salud | Francisco Duarte et al |
| EPI_ISL_512846 | O.I.J. MORGUE JUDICIAL                                          | Incienza, Instituto Costarricense de Investigación y Enseñanza en Nutrición y Salud | Francisco Duarte et al |
| EPI_ISL_512672 | Hospital De Niños Dr. Carlos Saenz Herrera [San Jose/San Jose]  | Incienza, Instituto Costarricense de Investigación y Enseñanza en Nutrición y Salud | Francisco Duarte et al |
| EPI_ISL_512674 | Hospital De Niños Dr. Carlos Saenz Herrera [San Jose/San Jose]  | Incienza, Instituto Costarricense de Investigación y Enseñanza en Nutrición y Salud | Francisco Duarte et al |
| EPI_ISL_527739 | Hospital Mexico [San Jose/San Jose]                             | Incienza, Instituto Costarricense de Investigación y Enseñanza en Nutrición y Salud | Francisco Duarte et al |
| EPI_ISL_527740 | Area De Salud Alajuela Norte - Clinica Dr. Marcial Rodriguez    | Incienza, Instituto Costarricense de Investigación y Enseñanza en Nutrición y Salud | Francisco Duarte et al |
| EPI_ISL_527743 | Hospital Cima                                                   | Incienza, Instituto Costarricense de Investigación y Enseñanza en Nutrición y Salud | Francisco Duarte et al |
| EPI_ISL_527744 | Hospital Cima                                                   | Incienza, Instituto Costarricense de Investigación y Enseñanza en Nutrición y Salud | Francisco Duarte et al |
| EPI_ISL_527750 | Hospital De Niños Dr. Carlos Saenz Herrera [San Jose/San Jose]  | Incienza, Instituto Costarricense de Investigación y Enseñanza en Nutrición y Salud | Francisco Duarte et al |
| EPI_ISL_527751 | Area De Salud Corredores                                        | Incienza, Instituto Costarricense de Investigación y Enseñanza en Nutrición y Salud | Francisco Duarte et al |
| EPI_ISL_527755 | Centro Nacional De Rehabilitacion Humberto Araya Rojas (Cenare) | Incienza, Instituto Costarricense de Investigación y Enseñanza en Nutrición y Salud | Francisco Duarte et al |
| EPI_ISL_682235 | AREA DE SALUD ALAJUELA NORTE - CLINICA DR. MARCIAL RODRIGUEZ    | Incienza, Instituto Costarricense de Investigación y Enseñanza en Nutrición y Salud | Francisco Duarte et al |
| EPI_ISL_682237 | AREA DE SALUD CORREDORES                                        | Incienza, Instituto Costarricense de Investigación y Enseñanza en Nutrición y Salud | Francisco Duarte et al |
| EPI_ISL_682239 | HOSPITAL CIUDAD NEILY                                           | Incienza, Instituto Costarricense de Investigación y Enseñanza en Nutrición y Salud | Francisco Duarte et al |
| EPI_ISL_682254 | HOSPITAL SAN JUAN DE DIOS                                       | Incienza, Instituto Costarricense de Investigación y Enseñanza en Nutrición y Salud | Francisco Duarte et al |
| EPI_ISL_682262 | HOSPITAL SAN JUAN DE DIOS                                       | Incienza, Instituto Costarricense de Investigación y Enseñanza en Nutrición y Salud | Francisco Duarte et al |
| EPI_ISL_682263 | HOSPITAL SAN JUAN DE DIOS                                       | Incienza, Instituto Costarricense de Investigación y Enseñanza en Nutrición y Salud | Francisco Duarte et al |
| EPI_ISL_682266 | HOSPITAL SAN JUAN DE DIOS                                       | Incienza, Instituto Costarricense de Investigación y Enseñanza en Nutrición y Salud | Francisco Duarte et al |
| EPI_ISL_682267 | HOSPITAL SAN JUAN DE DIOS                                       | Incienza, Instituto Costarricense de Investigación y Enseñanza en Nutrición y Salud | Francisco Duarte et al |
| EPI_ISL_682270 | HOSPITAL SAN JUAN DE DIOS                                       | Incienza, Instituto Costarricense de Investigación y Enseñanza en Nutrición y Salud | Francisco Duarte et al |

|                |                                                              |                                                                                     |                        |
|----------------|--------------------------------------------------------------|-------------------------------------------------------------------------------------|------------------------|
| EPI_ISL_682271 | HOSPITAL SAN JUAN DE DIOS                                    | Inciensa, Instituto Costarricense de Investigación y Enseñanza en Nutrición y Salud | Francisco Duarte et al |
| EPI_ISL_682272 | HOSPITAL SAN JUAN DE DIOS                                    | Inciensa, Instituto Costarricense de Investigación y Enseñanza en Nutrición y Salud | Francisco Duarte et al |
| EPI_ISL_682273 | HOSPITAL SAN JUAN DE DIOS                                    | Inciensa, Instituto Costarricense de Investigación y Enseñanza en Nutrición y Salud | Francisco Duarte et al |
| EPI_ISL_682277 | LABORATORIOS LABIN                                           | Inciensa, Instituto Costarricense de Investigación y Enseñanza en Nutrición y Salud | Francisco Duarte et al |
| EPI_ISL_770010 | Area De Salud Escazu (Coopesana)                             | Inciensa, Instituto Costarricense de Investigación y Enseñanza en Nutrición y Salud | Francisco Duarte et al |
| EPI_ISL_770006 | Hle - Asociacion Hogar De Ancianos De Palmar Sur De Osa      | Inciensa, Instituto Costarricense de Investigación y Enseñanza en Nutrición y Salud | Francisco Duarte et al |
| EPI_ISL_769993 | Area De Salud El Guarco                                      | Inciensa, Instituto Costarricense de Investigación y Enseñanza en Nutrición y Salud | Francisco Duarte et al |
| EPI_ISL_769990 | Hospital Dr. Rafael A. Calderon Guardia                      | Inciensa, Instituto Costarricense de Investigación y Enseñanza en Nutrición y Salud | Francisco Duarte et al |
| EPI_ISL_769994 | Area De Salud Catedral Noreste                               | Inciensa, Instituto Costarricense de Investigación y Enseñanza en Nutrición y Salud | Francisco Duarte et al |
| EPI_ISL_770028 | Hospital Dr. Raul Blanco Cervantes                           | Inciensa, Instituto Costarricense de Investigación y Enseñanza en Nutrición y Salud | Francisco Duarte et al |
| EPI_ISL_769991 | Laboratorio Clínico Labin                                    | Inciensa, Instituto Costarricense de Investigación y Enseñanza en Nutrición y Salud | Francisco Duarte et al |
| EPI_ISL_770013 | Hle - Asilos De Ancianos                                     | Inciensa, Instituto Costarricense de Investigación y Enseñanza en Nutrición y Salud | Francisco Duarte et al |
| EPI_ISL_770031 | Hle-Asociacion De Atencion Integral Del Anciano San Cayetano | Inciensa, Instituto Costarricense de Investigación y Enseñanza en Nutrición y Salud | Francisco Duarte et al |
| EPI_ISL_770032 | Hle-Asociacion De Atencion Integral Del Anciano San Cayetano | Inciensa, Instituto Costarricense de Investigación y Enseñanza en Nutrición y Salud | Francisco Duarte et al |
| EPI_ISL_770007 | Area De Salud San Rafael                                     | Inciensa, Instituto Costarricense de Investigación y Enseñanza en Nutrición y Salud | Francisco Duarte et al |
| EPI_ISL_770000 | Area De Salud La Cruz                                        | Inciensa, Instituto Costarricense de Investigación y Enseñanza en Nutrición y Salud | Francisco Duarte et al |
| EPI_ISL_770004 | Clinica Biblica                                              | Inciensa, Instituto Costarricense de Investigación y Enseñanza en Nutrición y Salud | Francisco Duarte et al |
| EPI_ISL_770001 | Area De Salud La Cruz                                        | Inciensa, Instituto Costarricense de Investigación y Enseñanza en Nutrición y Salud | Francisco Duarte et al |
| EPI_ISL_770002 | Area De Salud La Cruz                                        | Inciensa, Instituto Costarricense de Investigación y Enseñanza en Nutrición y Salud | Francisco Duarte et al |
| EPI_ISL_769987 | Laboratorio Clínico Labin                                    | Inciensa, Instituto Costarricense de Investigación y Enseñanza en Nutrición y Salud | Francisco Duarte et al |
| EPI_ISL_769996 | Area De Salud San Juan-San Diego-Concepcion 2                | Inciensa, Instituto Costarricense de Investigación y Enseñanza en Nutrición y Salud | Francisco Duarte et al |
| EPI_ISL_770015 | Area De Salud San Francisco-San Antonio (Coopesana)          | Inciensa, Instituto Costarricense de Investigación y Enseñanza en Nutrición y Salud | Francisco Duarte et al |
| EPI_ISL_770025 | Area De Salud San Juan-San Diego-Concepcion 2                | Inciensa, Instituto Costarricense de Investigación y Enseñanza en Nutrición y Salud | Francisco Duarte et al |
| EPI_ISL_770017 | Area De Salud Perez Zeledon                                  | Inciensa, Instituto Costarricense de Investigación y Enseñanza en Nutrición y Salud | Francisco Duarte et al |
| EPI_ISL_770008 | Area De Salud Corredores                                     | Inciensa, Instituto Costarricense de Investigación y Enseñanza en Nutrición y Salud | Francisco Duarte et al |
| EPI_ISL_770018 | Laboratorio Cenahce                                          | Inciensa, Instituto Costarricense de Investigación y Enseñanza en Nutrición y Salud | Francisco Duarte et al |

|                |                                                                                 |                                                                                     |                        |
|----------------|---------------------------------------------------------------------------------|-------------------------------------------------------------------------------------|------------------------|
| EPI_ISL_770003 | Area De Salud La Cruz                                                           | Inciensa, Instituto Costarricense de Investigación y Enseñanza en Nutrición y Salud | Francisco Duarte et al |
| EPI_ISL_770030 | Area De Salud Buenos Aires                                                      | Inciensa, Instituto Costarricense de Investigación y Enseñanza en Nutrición y Salud | Francisco Duarte et al |
| EPI_ISL_769989 | Area De Salud San Francisco-San Antonio (Coopesana)                             | Inciensa, Instituto Costarricense de Investigación y Enseñanza en Nutrición y Salud | Francisco Duarte et al |
| EPI_ISL_770020 | Area De Salud Goicoechea 2 - Clinica Dr. Jimenez Nuñez                          | Inciensa, Instituto Costarricense de Investigación y Enseñanza en Nutrición y Salud | Francisco Duarte et al |
| EPI_ISL_770021 | Area De Salud Catedral Noreste                                                  | Inciensa, Instituto Costarricense de Investigación y Enseñanza en Nutrición y Salud | Francisco Duarte et al |
| EPI_ISL_770023 | Area De Salud San Francisco-San Antonio (Coopesana)                             | Inciensa, Instituto Costarricense de Investigación y Enseñanza en Nutrición y Salud | Francisco Duarte et al |
| EPI_ISL_770005 | Area De Salud Moravia                                                           | Inciensa, Instituto Costarricense de Investigación y Enseñanza en Nutrición y Salud | Francisco Duarte et al |
| EPI_ISL_914794 | AREA DE SALUD BUENOS AIRES                                                      | Inciensa, Instituto Costarricense de Investigación y Enseñanza en Nutrición y Salud | Francisco Duarte et al |
| EPI_ISL_914795 | HOSPITAL DR. FERNANDO ESCALANTE PRADILLA                                        | Inciensa, Instituto Costarricense de Investigación y Enseñanza en Nutrición y Salud | Francisco Duarte et al |
| EPI_ISL_914796 | TAMIZAJE COMUNITARIO - PASO CANOAS                                              | Inciensa, Instituto Costarricense de Investigación y Enseñanza en Nutrición y Salud | Francisco Duarte et al |
| EPI_ISL_914798 | AREA DE SALUD CARTAGO                                                           | Inciensa, Instituto Costarricense de Investigación y Enseñanza en Nutrición y Salud | Francisco Duarte et al |
| EPI_ISL_914800 | AREA DE SALUD SAN FRANCISCO-SAN ANTONIO (COOPESANA)                             | Inciensa, Instituto Costarricense de Investigación y Enseñanza en Nutrición y Salud | Francisco Duarte et al |
| EPI_ISL_914808 | HLE - ASOCIACION HOGAR PARA ANCIANOS PRESBITERO JAFET JIMENEZ MORALES DE GRECIA | Inciensa, Instituto Costarricense de Investigación y Enseñanza en Nutrición y Salud | Francisco Duarte et al |
| EPI_ISL_914809 | AREA DE SALUD OREAMUNO-PACAYAS-TIERRA BLANCA                                    | Inciensa, Instituto Costarricense de Investigación y Enseñanza en Nutrición y Salud | Francisco Duarte et al |
| EPI_ISL_914811 | AREA DE SALUD GOICOECHEA 2 - CLINICA DR. JIMENEZ NUÑEZ                          | Inciensa, Instituto Costarricense de Investigación y Enseñanza en Nutrición y Salud | Francisco Duarte et al |
| EPI_ISL_914812 | AREA DE SALUD GOICOECHEA 2 - CLINICA DR. JIMENEZ NUÑEZ                          | Inciensa, Instituto Costarricense de Investigación y Enseñanza en Nutrición y Salud | Francisco Duarte et al |
| EPI_ISL_914813 | TAMIZAJE COMUNITARIO - PASO CANOAS                                              | Inciensa, Instituto Costarricense de Investigación y Enseñanza en Nutrición y Salud | Francisco Duarte et al |
| EPI_ISL_914815 | HOSPITAL DE NIÑOS DR. CARLOS SAENZ HERRERA                                      | Inciensa, Instituto Costarricense de Investigación y Enseñanza en Nutrición y Salud | Francisco Duarte et al |
| EPI_ISL_914816 | HOSPITAL DE NIÑOS DR. CARLOS SAENZ HERRERA                                      | Inciensa, Instituto Costarricense de Investigación y Enseñanza en Nutrición y Salud | Francisco Duarte et al |
| EPI_ISL_914817 | HOSPITAL DE NIÑOS DR. CARLOS SAENZ HERRERA                                      | Inciensa, Instituto Costarricense de Investigación y Enseñanza en Nutrición y Salud | Francisco Duarte et al |
| EPI_ISL_914818 | HOSPITAL DE NIÑOS DR. CARLOS SAENZ HERRERA                                      | Inciensa, Instituto Costarricense de Investigación y Enseñanza en Nutrición y Salud | Francisco Duarte et al |
| EPI_ISL_914819 | HOSPITAL DE NIÑOS DR. CARLOS SAENZ HERRERA                                      | Inciensa, Instituto Costarricense de Investigación y Enseñanza en Nutrición y Salud | Francisco Duarte et al |
| EPI_ISL_914820 | AREA DE SALUD SAN JUAN-SAN DIEGO-CONCEPCION 2                                   | Inciensa, Instituto Costarricense de Investigación y Enseñanza en Nutrición y Salud | Francisco Duarte et al |
| EPI_ISL_914823 | HOSPITAL DR. ENRIQUE BALTODANO BRICEÑO                                          | Inciensa, Instituto Costarricense de Investigación y Enseñanza en Nutrición y Salud | Francisco Duarte et al |
| EPI_ISL_914824 | TAMIZAJE COMUNITARIO - PASO CANOAS                                              | Inciensa, Instituto Costarricense de Investigación y Enseñanza en Nutrición y Salud | Francisco Duarte et al |
| EPI_ISL_914829 | TAMIZAJE COMUNITARIO - PASO CANOAS                                              | Inciensa, Instituto Costarricense de Investigación y Enseñanza en Nutrición y Salud | Francisco Duarte et al |



|                |                                                                                                        |                                                                                                        |                           |
|----------------|--------------------------------------------------------------------------------------------------------|--------------------------------------------------------------------------------------------------------|---------------------------|
| EPI_ISL_614387 | Molecular diagnostic unit for viral haemorrhagic fevers and emerging viruses, Bouaké CHU Laboratory    | Project group Epidemiology of Highly Pathogenic Microorganisms, Robert Koch-Institute                  | Chantal Akoua-Koffi et al |
| EPI_ISL_614390 | Molecular diagnostic unit for viral haemorrhagic fevers and emerging viruses, Bouaké CHU Laboratory    | Project group Epidemiology of Highly Pathogenic Microorganisms, Robert Koch-Institute                  | Chantal Akoua-Koffi et al |
| EPI_ISL_614391 | Molecular diagnostic unit for viral haemorrhagic fevers and emerging viruses, Bouaké CHU Laboratory    | Project group Epidemiology of Highly Pathogenic Microorganisms, Robert Koch-Institute                  | Chantal Akoua-Koffi et al |
| EPI_ISL_614393 | Molecular diagnostic unit for viral haemorrhagic fevers and emerging viruses, Bouaké CHU Laboratory    | Project group Epidemiology of Highly Pathogenic Microorganisms, Robert Koch-Institute                  | Chantal Akoua-Koffi et al |
| EPI_ISL_614394 | Molecular diagnostic unit for viral haemorrhagic fevers and emerging viruses, Bouaké CHU Laboratory    | Project group Epidemiology of Highly Pathogenic Microorganisms, Robert Koch-Institute                  | Chantal Akoua-Koffi et al |
| EPI_ISL_614395 | Molecular diagnostic unit for viral haemorrhagic fevers and emerging viruses, Bouaké CHU Laboratory    | Project group Epidemiology of Highly Pathogenic Microorganisms, Robert Koch-Institute                  | Chantal Akoua-Koffi et al |
| EPI_ISL_681830 | Molecular diagnostic unit for viral haemorrhagic fevers and emerging viruses, Bouaké CHU Laboratory    | Project group Epidemiology of Highly Pathogenic Microorganisms, Robert Koch-Institute                  | Chantal Akoua-Koffi et al |
| EPI_ISL_614347 | Molecular diagnostic unit for viral haemorrhagic fevers and emerging viruses, Bouaké CHU Laboratory    | Project group Epidemiology of Highly Pathogenic Microorganisms, Robert Koch-Institute                  | Chantal Akoua-Koffi et al |
| EPI_ISL_733077 | HELIX LLC                                                                                              | WHO National Influenza Centre Russian Federation                                                       | Andrey Komissarov et al   |
| EPI_ISL_733078 | HELIX LLC                                                                                              | WHO National Influenza Centre Russian Federation                                                       | Andrey Komissarov et al   |
| EPI_ISL_733151 | HELIX LLC                                                                                              | WHO National Influenza Centre Russian Federation                                                       | Andrey Komissarov et al   |
| EPI_ISL_733433 | HELIX LLC                                                                                              | WHO National Influenza Centre Russian Federation                                                       | Andrey Komissarov et al   |
| EPI_ISL_733452 | HELIX LLC                                                                                              | WHO National Influenza Centre Russian Federation                                                       | Andrey Komissarov et al   |
| EPI_ISL_428901 | State Research Center of Virology and Biotechnology VECTOR, Department of Collection of Microorganisms | State Research Center of Virology and Biotechnology VECTOR, Department of Collection of Microorganisms | Sergey A. Bodnev et al    |
| EPI_ISL_454602 | Croatian Institute of Public Health                                                                    | University of Zagreb, Centre for research and knowledge transfer in biotechnology                      | Irena Tabain et al        |
| EPI_ISL_985406 | "Dr. Andrija Stampar" Teaching Institute of Public Health, Department of Clinical Microbiology         | Institute of Applied Genomics                                                                          | Jasmina Vranes et al      |
| EPI_ISL_985407 | "Dr. Andrija Stampar" Teaching Institute of Public Health, Department of Clinical Microbiology         | Institute of Applied Genomics                                                                          | Jasmina Vranes et al      |
| EPI_ISL_991178 | "Dr. Andrija Stampar" Teaching Institute of Public Health, Department of Clinical Microbiology         | Institute of Applied Genomics                                                                          | Jasmina Vranes et al      |
| EPI_ISL_994657 | "Dr. Andrija Stampar" Teaching Institute of Public Health, Department of Clinical Microbiology         | Institute of Applied Genomics                                                                          | Jasmina Vranes et al      |
| EPI_ISL_994658 | "Dr. Andrija Stampar" Teaching Institute of Public Health, Department of Clinical Microbiology         | Institute of Applied Genomics                                                                          | Jasmina Vranes et al      |
| EPI_ISL_994659 | "Dr. Andrija Stampar" Teaching Institute of Public Health, Department of Clinical Microbiology         | Institute of Applied Genomics                                                                          | Jasmina Vranes et al      |
| EPI_ISL_994662 | "Dr. Andrija Stampar" Teaching Institute of Public Health, Department of Clinical Microbiology         | Institute of Applied Genomics                                                                          | Jasmina Vranes et al      |
| EPI_ISL_994740 | "Dr. Andrija Stampar" Teaching Institute of Public Health, Department of Clinical Microbiology         | Institute of Applied Genomics                                                                          | Jasmina Vranes et al      |
| EPI_ISL_996004 | "Dr. Andrija Stampar" Teaching Institute of Public Health, Department of Clinical Microbiology         | Institute of Applied Genomics                                                                          | Jasmina Vranes et al      |
| EPI_ISL_994739 | "Dr. Andrija Stampar" Teaching Institute of Public Health, Department of Clinical Microbiology         | Institute of Applied Genomics                                                                          | Jasmina Vranes et al      |
| EPI_ISL_468656 | Institute for Public Health                                                                            | Laboratory for advanced genomics                                                                       | Filip Rokić et al         |
| EPI_ISL_454606 | Institute for Public Health                                                                            | Laboratory for advanced genomics                                                                       | Filip Rokić et al         |
| EPI_ISL_468591 | Institute for Public Health                                                                            | Laboratory for advanced genomics                                                                       | Filip Rokić et al         |
| EPI_ISL_454574 | Institute for Public Health                                                                            | Laboratory for advanced genomics                                                                       | Filip Rokić et al         |

|                |                                                                                  |                                                                                                         |                        |
|----------------|----------------------------------------------------------------------------------|---------------------------------------------------------------------------------------------------------|------------------------|
| EPI_ISL_451934 | Research Unit, University Hospital for Infectious Diseases "Dr. Fran Mihaljević" | Cicin Sain lab, Helmholtz Centre for Infection Research                                                 | Zeeshan Chaudhry et al |
| EPI_ISL_710574 | University Hospital Dubrava                                                      | Ruđer Boškovic Institute; Forensic Science Centre Ivan Vučetić; University of Zagreb Faculty of Science | Robert Belužić et al   |
| EPI_ISL_710568 | University Hospital Dubrava                                                      | Ruđer Boškovic Institute; Forensic Science Centre Ivan Vučetić; University of Zagreb Faculty of Science | Robert Belužić et al   |
| EPI_ISL_710549 | University Hospital Dubrava                                                      | Ruđer Boškovic Institute; Forensic Science Centre Ivan Vučetić; University of Zagreb Faculty of Science | Robert Belužić et al   |
| EPI_ISL_710555 | University Hospital Dubrava                                                      | Ruđer Boškovic Institute; Forensic Science Centre Ivan Vučetić; University of Zagreb Faculty of Science | Robert Belužić et al   |
| EPI_ISL_710548 | University Hospital Dubrava                                                      | Ruđer Boškovic Institute; Forensic Science Centre Ivan Vučetić; University of Zagreb Faculty of Science | Robert Belužić et al   |
| EPI_ISL_710559 | University Hospital Dubrava                                                      | Ruđer Boškovic Institute; Forensic Science Centre Ivan Vučetić; University of Zagreb Faculty of Science | Robert Belužić et al   |
| EPI_ISL_710561 | University Hospital Dubrava                                                      | Ruđer Boškovic Institute; Forensic Science Centre Ivan Vučetić; University of Zagreb Faculty of Science | Robert Belužić et al   |
| EPI_ISL_710550 | University Hospital Dubrava                                                      | Ruđer Boškovic Institute; Forensic Science Centre Ivan Vučetić; University of Zagreb Faculty of Science | Robert Belužić et al   |
| EPI_ISL_710567 | University Hospital Dubrava                                                      | Ruđer Boškovic Institute; Forensic Science Centre Ivan Vučetić; University of Zagreb Faculty of Science | Robert Belužić et al   |
| EPI_ISL_710551 | University Hospital Dubrava                                                      | Ruđer Boškovic Institute; Forensic Science Centre Ivan Vučetić; University of Zagreb Faculty of Science | Robert Belužić et al   |
| EPI_ISL_710566 | University Hospital Dubrava                                                      | Ruđer Boškovic Institute; Forensic Science Centre Ivan Vučetić; University of Zagreb Faculty of Science | Robert Belužić et al   |
| EPI_ISL_710570 | University Hospital Dubrava                                                      | Ruđer Boškovic Institute; Forensic Science Centre Ivan Vučetić; University of Zagreb Faculty of Science | Robert Belužić et al   |
| EPI_ISL_710552 | University Hospital Dubrava                                                      | Ruđer Boškovic Institute; Forensic Science Centre Ivan Vučetić; University of Zagreb Faculty of Science | Robert Belužić et al   |
| EPI_ISL_710565 | University Hospital Dubrava                                                      | Ruđer Boškovic Institute; Forensic Science Centre Ivan Vučetić; University of Zagreb Faculty of Science | Robert Belužić et al   |
| EPI_ISL_710573 | University Hospital Dubrava                                                      | Ruđer Boškovic Institute; Forensic Science Centre Ivan Vučetić; University of Zagreb Faculty of Science | Robert Belužić et al   |
| EPI_ISL_710554 | Sestre Milosrdnice University Hospital Center                                    | Ruđer Boškovic Institute; Forensic Science Centre Ivan Vučetić; University of Zagreb Faculty of Science | Robert Belužić et al   |
| EPI_ISL_710556 | University Hospital Dubrava                                                      | Ruđer Boškovic Institute; Forensic Science Centre Ivan Vučetić; University of Zagreb Faculty of Science | Robert Belužić et al   |
| EPI_ISL_710571 | University Hospital Dubrava                                                      | Ruđer Boškovic Institute; Forensic Science Centre Ivan Vučetić; University of Zagreb Faculty of Science | Robert Belužić et al   |
| EPI_ISL_710560 | University Hospital Dubrava                                                      | Ruđer Boškovic Institute; Forensic Science Centre Ivan Vučetić; University of Zagreb Faculty of Science | Robert Belužić et al   |
| EPI_ISL_710572 | University Hospital Dubrava                                                      | Ruđer Boškovic Institute; Forensic Science Centre Ivan Vučetić; University of Zagreb Faculty of Science | Robert Belužić et al   |
| EPI_ISL_710558 | University Hospital Dubrava                                                      | Ruđer Boškovic Institute; Forensic Science Centre Ivan Vučetić; University of Zagreb Faculty of Science | Robert Belužić et al   |
| EPI_ISL_513312 | Public Health, United States Air Force School of Aerospace Medicine              | Public Health, United States Air Force School of Aerospace Medicine                                     | Fries et al            |
| EPI_ISL_513313 | Public Health, United States Air Force School of Aerospace Medicine              | Public Health, United States Air Force School of Aerospace Medicine                                     | Fries et al            |
| EPI_ISL_547450 | Dutch COVID-19 response team                                                     | National Institute for Public Health and the Environment (RIVM)                                         | Adam Meijer et al      |
| EPI_ISL_547451 | Dutch COVID-19 response team                                                     | National Institute for Public Health and the Environment (RIVM)                                         | Adam Meijer et al      |
| EPI_ISL_547452 | Dutch COVID-19 response team                                                     | National Institute for Public Health and the Environment (RIVM)                                         | Adam Meijer et al      |
| EPI_ISL_547453 | Dutch COVID-19 response team                                                     | National Institute for Public Health and the Environment (RIVM)                                         | Adam Meijer et al      |









|                |                                                                          |                                                                               |                               |
|----------------|--------------------------------------------------------------------------|-------------------------------------------------------------------------------|-------------------------------|
| EPI_ISL_882951 | The National Institute of Public Health                                  | State Veterinary Institute Prague                                             | Nagy et al                    |
| EPI_ISL_960426 | The National Institute of Public Health                                  | State Veterinary Institute Prague                                             | Nagy et al                    |
| EPI_ISL_850688 | The National Institute of Public Health                                  | State Veterinary Institute Prague                                             | Nagy et al                    |
| EPI_ISL_882950 | The National Institute of Public Health                                  | State Veterinary Institute Prague                                             | Nagy et al                    |
| EPI_ISL_960431 | The National Institute of Public Health                                  | State Veterinary Institute Prague                                             | Nagy et al                    |
| EPI_ISL_471550 | The National Institute of Public Health                                  | State Veterinary Institute Prague and The National Institute of Public Health | Nagy et al                    |
| EPI_ISL_489708 | The National Institute of Public Health                                  | The National Institute of Public Health and State Veterinary Institute Prague | Nagy et al                    |
| EPI_ISL_491119 | The National Institute of Public Health                                  | The National Institute of Public Health and State Veterinary Institute Prague | Nagy et al                    |
| EPI_ISL_960421 | The National Institute of Public Health                                  | State Veterinary Institute Prague                                             | Nagy et al                    |
| EPI_ISL_960429 | The National Institute of Public Health                                  | State Veterinary Institute Prague                                             | Nagy et al                    |
| EPI_ISL_960427 | The National Institute of Public Health                                  | State Veterinary Institute Prague                                             | Nagy et al                    |
| EPI_ISL_577632 | The National Institute of Public Health                                  | State Veterinary Institute Prague                                             | Nagy et al                    |
| EPI_ISL_960422 | The National Institute of Public Health                                  | State Veterinary Institute Prague                                             | Nagy et al                    |
| EPI_ISL_541082 | The National Institute of Public Health                                  | State Veterinary Institute Prague                                             | Nagy et al                    |
| EPI_ISL_577633 | The National Institute of Public Health                                  | State Veterinary Institute Prague                                             | Nagy et al                    |
| EPI_ISL_545954 | The National Institute of Public Health                                  | State Veterinary Institute Prague                                             | Nagy et al                    |
| EPI_ISL_545956 | The National Institute of Public Health                                  | State Veterinary Institute Prague                                             | Nagy et al                    |
| EPI_ISL_547968 | The National Institute of Public Health                                  | State Veterinary Institute Prague                                             | Nagy et al                    |
| EPI_ISL_626575 | The National Institute of Public Health                                  | State Veterinary Institute Prague                                             | Nagy et al                    |
| EPI_ISL_626577 | The National Institute of Public Health                                  | State Veterinary Institute Prague                                             | Nagy et al                    |
| EPI_ISL_626578 | The National Institute of Public Health                                  | State Veterinary Institute Prague                                             | Nagy et al                    |
| EPI_ISL_626580 | The National Institute of Public Health                                  | State Veterinary Institute Prague                                             | Nagy et al                    |
| EPI_ISL_626584 | The National Institute of Public Health                                  | State Veterinary Institute Prague                                             | Nagy et al                    |
| EPI_ISL_626585 | The National Institute of Public Health                                  | State Veterinary Institute Prague                                             | Nagy et al                    |
| EPI_ISL_626571 | The National Institute of Public Health                                  | State Veterinary Institute Prague                                             | Nagy et al                    |
| EPI_ISL_626573 | The National Institute of Public Health                                  | State Veterinary Institute Prague                                             | Nagy et al                    |
| EPI_ISL_626588 | The National Institute of Public Health                                  | State Veterinary Institute Prague                                             | Nagy et al                    |
| EPI_ISL_626593 | The National Institute of Public Health                                  | State Veterinary Institute Prague                                             | Nagy et al                    |
| EPI_ISL_626594 | The National Institute of Public Health                                  | State Veterinary Institute Prague                                             | Nagy et al                    |
| EPI_ISL_626599 | The National Institute of Public Health                                  | State Veterinary Institute Prague                                             | Nagy et al                    |
| EPI_ISL_626600 | The National Institute of Public Health                                  | State Veterinary Institute Prague                                             | Nagy et al                    |
| EPI_ISL_626601 | The National Institute of Public Health                                  | State Veterinary Institute Prague                                             | Nagy et al                    |
| EPI_ISL_626605 | The National Institute of Public Health                                  | State Veterinary Institute Prague                                             | Nagy et al                    |
| EPI_ISL_626607 | The National Institute of Public Health                                  | State Veterinary Institute Prague                                             | Nagy et al                    |
| EPI_ISL_626612 | The National Institute of Public Health                                  | State Veterinary Institute Prague                                             | Nagy et al                    |
| EPI_ISL_626622 | The National Institute of Public Health                                  | State Veterinary Institute Prague                                             | Nagy et al                    |
| EPI_ISL_527489 | Viral Respiratory Lab, National Institute for Biomedical Research (INRB) | Pathogen Sequencing Lab, National Institute for Biomedical Research (INRB)    | Placide Mbala-Kingebeni et al |
| EPI_ISL_513628 | Viral Respiratory Lab, National Institute for Biomedical Research (INRB) | Pathogen Sequencing Lab, National Institute for Biomedical Research (INRB)    | Placide Mbala-Kingebeni et al |



|                |                                                                                                                                             |                                                                                       |                                         |
|----------------|---------------------------------------------------------------------------------------------------------------------------------------------|---------------------------------------------------------------------------------------|-----------------------------------------|
| EPI_ISL_636985 | Virology Lab, National Institute for Biomedical Research (INRB)                                                                             | Project group Epidemiology of Highly Pathogenic Microorganisms, Robert Koch-Institute | Jean-Jacques Muyembe Tamfum et al       |
| EPI_ISL_636987 | Virology Lab, National Institute for Biomedical Research (INRB)                                                                             | Project group Epidemiology of Highly Pathogenic Microorganisms, Robert Koch-Institute | Jean-Jacques Muyembe Tamfum et al       |
| EPI_ISL_452010 | Department of Clinical Microbiology, Copenhagen University Hospital, Hvidovre, Kettegaard Alle 30, 2650 Hvidovre.                           | Albertsen lab, Department of Chemistry and Bioscience, Aalborg University, Denmark    | Rasmus Kirkegaard et al                 |
| EPI_ISL_452024 | Department of Clinical Microbiology, Copenhagen University Hospital, Hvidovre, Kettegaard Alle 30, 2650 Hvidovre.                           | Albertsen lab, Department of Chemistry and Bioscience, Aalborg University, Denmark    | Rasmus Kirkegaard et al                 |
| EPI_ISL_452035 | Department of Clinical Microbiology, Copenhagen University Hospital, Hvidovre, Kettegaard Alle 30, 2650 Hvidovre.                           | Albertsen lab, Department of Chemistry and Bioscience, Aalborg University, Denmark    | Rasmus Kirkegaard et al                 |
| EPI_ISL_429284 | Department of Clinical Microbiology, Copenhagen University Hospital, Hvidovre, Kettegaard Alle 30, 2650 Hvidovre.                           | Albertsen lab, Department of Chemistry and Bioscience, Aalborg University, Denmark    | Rasmus Kirkegaard et al                 |
| EPI_ISL_444913 | Department of Virus and Microbiological Special Diagnostics, Statens Serum Institut, Copenhagen, Denmark, Artillerivej 5, 2300 Copenhagen S | Albertsen lab, Department of Chemistry and Bioscience, Aalborg University, Denmark    | Rasmus Kirkegaard et al                 |
| EPI_ISL_444919 | Department of Virus and Microbiological Special Diagnostics, Statens Serum Institut, Copenhagen, Denmark, Artillerivej 5, 2300 Copenhagen S | Albertsen lab, Department of Chemistry and Bioscience, Aalborg University, Denmark    | Rasmus Kirkegaard et al                 |
| EPI_ISL_429456 | Department of Virus and Microbiological Special Diagnostics, Statens Serum Institut, Copenhagen, Denmark, Artillerivej 5, 2300 Copenhagen S | Albertsen lab, Department of Chemistry and Bioscience, Aalborg University, Denmark    | Rasmus Kirkegaard et al                 |
| EPI_ISL_429484 | Department of Virus and Microbiological Special Diagnostics, Statens Serum Institut, Copenhagen, Denmark, Artillerivej 5, 2300 Copenhagen S | Albertsen lab, Department of Chemistry and Bioscience, Aalborg University, Denmark    | Rasmus Kirkegaard et al                 |
| EPI_ISL_614689 | Department of Virus and Microbiological Special Diagnostics, Statens Serum Institut, Denmark                                                | Albertsen lab, Department of Chemistry and Bioscience, Aalborg University, Denmark    | Danish Covid-19 Genome Consortia et al  |
| EPI_ISL_614510 | Department of Virus and Microbiological Special Diagnostics, Statens Serum Institut, Denmark                                                | Albertsen lab, Department of Chemistry and Bioscience, Aalborg University, Denmark    | Danish Covid-19 Genome Consortia et al  |
| EPI_ISL_614599 | Department of Virus and Microbiological Special Diagnostics, Statens Serum Institut, Denmark                                                | Albertsen lab, Department of Chemistry and Bioscience, Aalborg University, Denmark    | Danish Covid-19 Genome Consortia et al  |
| EPI_ISL_670958 | Department of Virus and Microbiological Special Diagnostics, Statens Serum Institut, Copenhagen, Denmark                                    | Albertsen Lab, Department of Chemistry and Bioscience, Aalborg University, Denmark    | Danish Covid-19 Genome Consortium et al |
| EPI_ISL_682411 | Department of Virus and Microbiological Special Diagnostics, Statens Serum Institut, Copenhagen, Denmark                                    | Albertsen Lab, Department of Chemistry and Bioscience, Aalborg University, Denmark    | Danish Covid-19 Genome Consortium et al |
| EPI_ISL_618043 | Department of Virus and Microbiological Special Diagnostics, Statens Serum Institut, Denmark                                                | Albertsen lab, Department of Chemistry and Bioscience, Aalborg University, Denmark    | Danish Covid-19 Genome Consortia et al  |
| EPI_ISL_622431 | Department of Virus and Microbiological Special Diagnostics, Statens Serum Institut, Denmark                                                | Albertsen lab, Department of Chemistry and Bioscience, Aalborg University, Denmark    | Danish Covid-19 Genome Consortia et al  |
| EPI_ISL_711079 | Department of Virus and Microbiological Special Diagnostics, Statens Serum Institut, Copenhagen, Denmark                                    | Albertsen Lab, Department of Chemistry and Bioscience, Aalborg University, Denmark    | Danish Covid-19 Genome Consortium et al |
| EPI_ISL_711070 | Department of Virus and Microbiological Special Diagnostics, Statens Serum Institut, Copenhagen, Denmark                                    | Albertsen Lab, Department of Chemistry and Bioscience, Aalborg University, Denmark    | Danish Covid-19 Genome Consortium et al |
| EPI_ISL_711080 | Department of Virus and Microbiological Special Diagnostics, Statens Serum Institut, Copenhagen, Denmark                                    | Albertsen Lab, Department of Chemistry and Bioscience, Aalborg University, Denmark    | Danish Covid-19 Genome Consortium et al |
| EPI_ISL_711081 | Department of Virus and Microbiological Special Diagnostics, Statens Serum Institut, Copenhagen, Denmark                                    | Albertsen Lab, Department of Chemistry and Bioscience, Aalborg University, Denmark    | Danish Covid-19 Genome Consortium et al |
| EPI_ISL_618092 | Department of Virus and Microbiological Special Diagnostics, Statens Serum Institut, Denmark                                                | Albertsen lab, Department of Chemistry and Bioscience, Aalborg University, Denmark    | Danish Covid-19 Genome Consortia et al  |
| EPI_ISL_713122 | Department of Virus and Microbiological Special Diagnostics, Statens Serum Institut, Copenhagen, Denmark                                    | Albertsen Lab, Department of Chemistry and Bioscience, Aalborg University, Denmark    | Danish Covid-19 Genome Consortium et al |
| EPI_ISL_713455 | Department of Virus and Microbiological Special Diagnostics, Statens Serum Institut, Copenhagen, Denmark                                    | Albertsen Lab, Department of Chemistry and Bioscience, Aalborg University, Denmark    | Danish Covid-19 Genome Consortium et al |







|                |                                                                                                           |                                                                                                   |                                        |
|----------------|-----------------------------------------------------------------------------------------------------------|---------------------------------------------------------------------------------------------------|----------------------------------------|
| EPI_ISL_617310 | Department of Virus and Microbiological Special Diagnostics, Statens Serum Institut, Denmark              | Albertsen lab, Department of Chemistry and Bioscience, Aalborg University, Denmark                | Danish Covid-19 Genome Consortia et al |
| EPI_ISL_617926 | Department of Virus and Microbiological Special Diagnostics, Statens Serum Institut, Denmark              | Albertsen lab, Department of Chemistry and Bioscience, Aalborg University, Denmark                | Danish Covid-19 Genome Consortia et al |
| EPI_ISL_618044 | Department of Virus and Microbiological Special Diagnostics, Statens Serum Institut, Denmark              | Albertsen lab, Department of Chemistry and Bioscience, Aalborg University, Denmark                | Danish Covid-19 Genome Consortia et al |
| EPI_ISL_614452 | Department of Virus and Microbiological Special Diagnostics, Statens Serum Institut, Denmark              | Albertsen lab, Department of Chemistry and Bioscience, Aalborg University, Denmark                | Danish Covid-19 Genome Consortia et al |
| EPI_ISL_416142 | Department of Virus and Microbiological Special diagnostics, Statens Serum Institut, Copenhagen, Denmark. | Statens Serum Institute                                                                           | Morten Rasmussen et al                 |
| EPI_ISL_416143 | Department of Virus and Microbiological Special diagnostics, Statens Serum Institut, Copenhagen, Denmark. | VíFU                                                                                              | Morten Rasmussen et al                 |
| EPI_ISL_416140 | Department of Virus and Microbiological Special diagnostics, Statens Serum Institut, Copenhagen, Denmark. | Statens Serum Institute                                                                           | Morten Rasmussen et al                 |
| EPI_ISL_906851 | Respiratory Viruses Branch, Centers for Disease Control and Prevention                                    | Respiratory Viruses Branch, Centers for Disease Control and Prevention                            | Tao et al                              |
| EPI_ISL_525467 | Universidad Iberoamericana                                                                                | International Centre for Genetic Engineering and Biotechnology (ICGEB) and ARGO Open Lab Platform | Robert Paulino-Ramirez et al           |
| EPI_ISL_525468 | Universidad Iberoamericana                                                                                | International Centre for Genetic Engineering and Biotechnology (ICGEB) and ARGO Open Lab Platform | Robert Paulino-Ramirez et al           |
| EPI_ISL_525469 | Universidad Iberoamericana                                                                                | International Centre for Genetic Engineering and Biotechnology (ICGEB) and ARGO Open Lab Platform | Robert Paulino-Ramirez et al           |
| EPI_ISL_523811 | Universidad Iberoamericana, Instituto de Medicina Tropical & Salud Global                                 | International Centre for Genetic Engineering and Biotechnology (ICGEB) and ARGO Open Lab Platform | Robert Paulino-Ramirez et al           |
| EPI_ISL_523812 | Universidad Iberoamericana, Instituto de Medicina Tropical & Salud Global                                 | International Centre for Genetic Engineering and Biotechnology (ICGEB) and ARGO Open Lab Platform | Robert Paulino-Ramirez et al           |
| EPI_ISL_940777 | INSPI-CRN de Influenza y otros virus respiratorios                                                        | INSPI-Centro de Investigación Multidisciplinaria de la DTIDI                                      | Leandro Patiño et al                   |
| EPI_ISL_940821 | INSPI-CRN de Influenza y otros virus respiratorios                                                        | INSPI-Centro de Investigación Multidisciplinaria de la DTIDI                                      | Leandro Patiño et al                   |
| EPI_ISL_940775 | INSPI-CRN de Influenza y otros virus respiratorios                                                        | INSPI-Centro de Investigación Multidisciplinaria de la DTIDI                                      | Leandro Patiño et al                   |
| EPI_ISL_940773 | INSPI-CRN de Influenza y otros virus respiratorios                                                        | INSPI-Centro de Investigación Multidisciplinaria de la DTIDI                                      | Leandro Patiño et al                   |
| EPI_ISL_940781 | INSPI-CRN de Influenza y otros virus respiratorios                                                        | INSPI-Centro de Investigación Multidisciplinaria de la DTIDI                                      | Leandro Patiño et al                   |
| EPI_ISL_940769 | INSPI-CRN de Influenza y otros virus respiratorios                                                        | INSPI-Centro de Investigación Multidisciplinaria de la DTIDI                                      | Leandro Patiño et al                   |
| EPI_ISL_491945 | Instituto Nacional de Investigación en Salud Pública - INSPI                                              | INSPI - Charité                                                                                   | Alfredo Bruno Caicedo et al            |
| EPI_ISL_574292 | Instituto Nacional de Investigación en Salud Pública                                                      | Instituto Nacional de Investigación en Salud Pública                                              | Leandro Patino Patino et al            |
| EPI_ISL_491944 | Instituto Nacional de Investigación en Salud Pública - INSPI                                              | INSPI - Charité                                                                                   | Alfredo Bruno Caicedo et al            |
| EPI_ISL_574294 | Instituto Nacional de Investigación en Salud Pública                                                      | Instituto Nacional de Investigación en Salud Pública                                              | Leandro Patino Patino et al            |
| EPI_ISL_574293 | Instituto Nacional de Investigación en Salud Pública                                                      | Instituto Nacional de Investigación en Salud Pública                                              | Leandro Patino Patino et al            |
| EPI_ISL_491948 | Instituto Nacional de Investigación en Salud Pública - INSPI                                              | INSPI - Charité                                                                                   | Alfredo Bruno Caicedo et al            |
| EPI_ISL_491947 | Instituto Nacional de Investigación en Salud Pública - INSPI                                              | INSPI - Charité                                                                                   | Alfredo Bruno Caicedo et al            |
| EPI_ISL_491953 | Instituto Nacional de Investigación en Salud Pública - INSPI                                              | INSPI - Charité                                                                                   | Alfredo Bruno Caicedo et al            |
| EPI_ISL_491950 | Instituto Nacional de Investigación en Salud Pública - INSPI                                              | INSPI - Charité                                                                                   | Alfredo Bruno Caicedo et al            |
| EPI_ISL_491949 | Instituto Nacional de Investigación en Salud Pública - INSPI                                              | INSPI - Charité                                                                                   | Alfredo Bruno Caicedo et al            |
| EPI_ISL_491952 | Instituto Nacional de Investigación en Salud Pública - INSPI                                              | INSPI - Charité                                                                                   | Alfredo Bruno Caicedo et al            |
| EPI_ISL_491954 | Instituto Nacional de Investigación en Salud Pública - INSPI                                              | INSPI - Charité                                                                                   | Alfredo Bruno Caicedo et al            |
| EPI_ISL_491951 | Instituto Nacional de Investigación en Salud Pública - INSPI                                              | INSPI - Charité                                                                                   | Alfredo Bruno Caicedo et al            |



|                |                                                               |                                                                                                                                                                                |                             |
|----------------|---------------------------------------------------------------|--------------------------------------------------------------------------------------------------------------------------------------------------------------------------------|-----------------------------|
| EPI_ISL_491946 | Instituto Nacional de Investigación en Salud Pública - INSPI  | INSPI - Charité                                                                                                                                                                | Alfredo Bruno Caicedo et al |
| EPI_ISL_826830 | INSPI-CRN DE INFLUENZA Y OTROS VIRUS RESPIRATORIOS            | Instituto de Salud Publica de Chile                                                                                                                                            | Javier Tognarelli et al     |
| EPI_ISL_826832 | INSPI-CRN DE INFLUENZA Y OTROS VIRUS RESPIRATORIOS            | Instituto de Salud Publica de Chile                                                                                                                                            | Javier Tognarelli et al     |
| EPI_ISL_826829 | INSPI-CRN DE INFLUENZA Y OTROS VIRUS RESPIRATORIOS            | Instituto de Salud Publica de Chile                                                                                                                                            | Javier Tognarelli et al     |
| EPI_ISL_826834 | INSPI-CRN DE INFLUENZA Y OTROS VIRUS RESPIRATORIOS            | Instituto de Salud Publica de Chile                                                                                                                                            | Javier Tognarelli et al     |
| EPI_ISL_826798 | INSPI-CRN DE INFLUENZA Y OTROS VIRUS RESPIRATORIOS            | Instituto de Salud Publica de Chile                                                                                                                                            | Javier Tognarelli et al     |
| EPI_ISL_826800 | INSPI-CRN DE INFLUENZA Y OTROS VIRUS RESPIRATORIOS            | Instituto de Salud Publica de Chile                                                                                                                                            | Javier Tognarelli et al     |
| EPI_ISL_826802 | INSPI-CRN DE INFLUENZA Y OTROS VIRUS RESPIRATORIOS            | Instituto de Salud Publica de Chile                                                                                                                                            | Javier Tognarelli et al     |
| EPI_ISL_826805 | INSPI-CRN DE INFLUENZA Y OTROS VIRUS RESPIRATORIOS            | Instituto de Salud Publica de Chile                                                                                                                                            | Javier Tognarelli et al     |
| EPI_ISL_826807 | INSPI-CRN DE INFLUENZA Y OTROS VIRUS RESPIRATORIOS            | Instituto de Salud Publica de Chile                                                                                                                                            | Javier Tognarelli et al     |
| EPI_ISL_826809 | INSPI-CRN DE INFLUENZA Y OTROS VIRUS RESPIRATORIOS            | Instituto de Salud Publica de Chile                                                                                                                                            | Javier Tognarelli et al     |
| EPI_ISL_826811 | INSPI-CRN DE INFLUENZA Y OTROS VIRUS RESPIRATORIOS            | Instituto de Salud Publica de Chile                                                                                                                                            | Javier Tognarelli et al     |
| EPI_ISL_826812 | INSPI-CRN DE INFLUENZA Y OTROS VIRUS RESPIRATORIOS            | Instituto de Salud Publica de Chile                                                                                                                                            | Javier Tognarelli et al     |
| EPI_ISL_826814 | INSPI-CRN DE INFLUENZA Y OTROS VIRUS RESPIRATORIOS            | Instituto de Salud Publica de Chile                                                                                                                                            | Javier Tognarelli et al     |
| EPI_ISL_826816 | INSPI-CRN DE INFLUENZA Y OTROS VIRUS RESPIRATORIOS            | Instituto de Salud Publica de Chile                                                                                                                                            | Javier Tognarelli et al     |
| EPI_ISL_826818 | INSPI-CRN DE INFLUENZA Y OTROS VIRUS RESPIRATORIOS            | Instituto de Salud Publica de Chile                                                                                                                                            | Javier Tognarelli et al     |
| EPI_ISL_826836 | INSPI-CRN DE INFLUENZA Y OTROS VIRUS RESPIRATORIOS            | Instituto de Salud Publica de Chile                                                                                                                                            | Javier Tognarelli et al     |
| EPI_ISL_831020 | INSPI-CRN DE INFLUENZA Y OTROS VIRUS RESPIRATORIOS            | Instituto de Salud Publica de Chile                                                                                                                                            | Javier Tognarelli et al     |
| EPI_ISL_826820 | INSPI-CRN DE INFLUENZA Y OTROS VIRUS RESPIRATORIOS            | Instituto de Salud Publica de Chile                                                                                                                                            | Javier Tognarelli et al     |
| EPI_ISL_826822 | INSPI-CRN DE INFLUENZA Y OTROS VIRUS RESPIRATORIOS            | Instituto de Salud Publica de Chile                                                                                                                                            | Javier Tognarelli et al     |
| EPI_ISL_826825 | INSPI-CRN DE INFLUENZA Y OTROS VIRUS RESPIRATORIOS            | Instituto de Salud Publica de Chile                                                                                                                                            | Javier Tognarelli et al     |
| EPI_ISL_826823 | INSPI-CRN DE INFLUENZA Y OTROS VIRUS RESPIRATORIOS            | Instituto de Salud Publica de Chile                                                                                                                                            | Javier Tognarelli et al     |
| EPI_ISL_826804 | INSPI-CRN DE INFLUENZA Y OTROS VIRUS RESPIRATORIOS            | Instituto de Salud Publica de Chile                                                                                                                                            | Javier Tognarelli et al     |
| EPI_ISL_417482 | Institute of Microbiology, Universidad San Francisco de Quito | Institute of Microbiology, Universidad San Francisco de Quito                                                                                                                  | Sully Márquez et al         |
| EPI_ISL_422563 | Institute of Microbiology Universidad San Francisco de Quito  | Institute of Microbiology Universidad San Francisco de Quito<br>Av. Julián Coronel 905 entre Esmeraldas y José Mascote Av.<br>Juan Tanca Marengo No. 100 y Av. de las Américas | Belen Prado-Vivar et al     |
| EPI_ISL_806544 | INSPI Instituto Nacional de Investigación en Salud Pública    |                                                                                                                                                                                | Leandro Patiño et al        |
| EPI_ISL_477014 | Institute of Microbiology, Universidad San Francisco de Quito | Institute of Microbiology, Universidad San Francisco de Quito                                                                                                                  | Belen Prado-Vivar et al     |
| EPI_ISL_471267 | Hospital IESS Babahoyo                                        | Institute of Microbiology, Universidad San Francisco de Quito                                                                                                                  | Sully Márquez et al         |
| EPI_ISL_481244 | Hospital IESS Babahoyo                                        | Institute of Microbiology, Universidad San Francisco de Quito                                                                                                                  | Belén Prado-Vivar et al     |
| EPI_ISL_481245 | Hospital IESS Babahoyo                                        | Institute of Microbiology, Universidad San Francisco de Quito                                                                                                                  | Belén Prado-Vivar et al     |
| EPI_ISL_471268 | Hospital IESS Babahoyo                                        | Institute of Microbiology, Universidad San Francisco de Quito                                                                                                                  | Belén Prado-Vivar et al     |
| EPI_ISL_481246 | Hospital IESS Babahoyo                                        | Institute of Microbiology, Universidad San Francisco de Quito                                                                                                                  | Belén Prado-Vivar et al     |
| EPI_ISL_481247 | Hospital IESS Babahoyo                                        | Institute of Microbiology, Universidad San Francisco de Quito                                                                                                                  | Belén Prado-Vivar et al     |
| EPI_ISL_481248 | Hospital IESS Babahoyo                                        | Institute of Microbiology, Universidad San Francisco de Quito                                                                                                                  | Belén Prado-Vivar et al     |
| EPI_ISL_477015 | Institute of Microbiology, Universidad San Francisco de Quito | Institute of Microbiology, Universidad San Francisco de Quito                                                                                                                  | Sully Márquez et al         |
| EPI_ISL_477016 | Institute of Microbiology, Universidad San Francisco de Quito | Institute of Microbiology, Universidad San Francisco de Quito                                                                                                                  | Juan José Guadalupe et al   |
| EPI_ISL_486842 | Institute of Microbiology, Universidad San Francisco de Quito | Institute of Microbiology, Universidad San Francisco de Quito                                                                                                                  | Belén Prado-Vivar et al     |
| EPI_ISL_471271 | Hospital Oncológico Solca Núcleo de Quito                     | Institute of Microbiology, Universidad San Francisco de Quito                                                                                                                  | Sully Márquez et al         |
| EPI_ISL_486843 | Institute of Microbiology, Universidad San Francisco de Quito | Institute of Microbiology, Universidad San Francisco de Quito                                                                                                                  | Belén Prado-Vivar et al     |







|                |                                                                                                                                                                                  |                                                                                                                                                                                 |                          |
|----------------|----------------------------------------------------------------------------------------------------------------------------------------------------------------------------------|---------------------------------------------------------------------------------------------------------------------------------------------------------------------------------|--------------------------|
| EPI_ISL_907083 | Biology, MCL                                                                                                                                                                     | Biology, MCL                                                                                                                                                                    | Seadawy et al            |
| EPI_ISL_907084 | Biology, MCL                                                                                                                                                                     | Biology, MCL                                                                                                                                                                    | Seadawy et al            |
| EPI_ISL_907085 | Biology, MCL                                                                                                                                                                     | Biology, MCL                                                                                                                                                                    | Seadawy et al            |
| EPI_ISL_510526 | Biological prevention, army                                                                                                                                                      | Biological prevention, army                                                                                                                                                     | Seadawy et al            |
| EPI_ISL_605780 | CEIRS Data Processing and Coordinating Center, St. Jude Center of Excellence for Influenza Research and Surveillance (CEIRS)                                                     | Center of Excellence for Influenza Research and Surveillance (CEIRS)                                                                                                            | Roshdy et al             |
| EPI_ISL_529031 | Central Molecular Microbiology Laboratory, Clinical and Chemical Pathology Department, Faculty of Medicine, CAIRO UNIVERSITY                                                     | Next Generation Sequencing Reference Laboratory, Faculty of Medicine, Cairo University and The Center for Genome and Microbiome Research, Faculty of Pharmacy, CAIRO UNIVERSITY | May Sherif Soliman et al |
| EPI_ISL_529032 | Central Molecular Microbiology Laboratory and Next Generation Sequencing Reference Laboratory, Clinical and Chemical Pathology Department, Faculty of Medicine, CAIRO UNIVERSITY | Next Generation Sequencing Reference Laboratory, Faculty of Medicine, CAIRO UNIVERSITY and The Center for Genome and Microbiome Research, Faculty of Pharmacy, CAIRO UNIVERSITY | May Sherif Soliman et al |
| EPI_ISL_528386 | Viral vaccines, VSVRI- Veterinary serum and vaccine research institute                                                                                                           | Viral vaccines, VSVRI- Veterinary serum and vaccine research institute                                                                                                          | Saleh et al              |
| EPI_ISL_812783 | Genomics Program, Children Cancer Hospital                                                                                                                                       | Genomics Program, Children Cancer Hospital                                                                                                                                      | Hatem et al              |
| EPI_ISL_812784 | Genomics Program, Children Cancer Hospital                                                                                                                                       | Genomics Program, Children Cancer Hospital                                                                                                                                      | Hatem et al              |
| EPI_ISL_812785 | Genomics Program, Children Cancer Hospital                                                                                                                                       | Genomics Program, Children Cancer Hospital                                                                                                                                      | Hatem et al              |
| EPI_ISL_812786 | Genomics Program, Children Cancer Hospital                                                                                                                                       | Genomics Program, Children Cancer Hospital                                                                                                                                      | Hatem et al              |
| EPI_ISL_812792 | Genomics Program, Children Cancer Hospital                                                                                                                                       | Genomics Program, Children Cancer Hospital                                                                                                                                      | Hatem et al              |
| EPI_ISL_812793 | Genomics Program, Children Cancer Hospital                                                                                                                                       | Genomics Program, Children Cancer Hospital                                                                                                                                      | Hatem et al              |
| EPI_ISL_812794 | Genomics Program, Children Cancer Hospital                                                                                                                                       | Genomics Program, Children Cancer Hospital                                                                                                                                      | Hatem et al              |
| EPI_ISL_812798 | Genomics Program, Children Cancer Hospital                                                                                                                                       | Genomics Program, Children Cancer Hospital                                                                                                                                      | Hatem et al              |
| EPI_ISL_812799 | Genomics Program, Children Cancer Hospital                                                                                                                                       | Genomics Program, Children Cancer Hospital                                                                                                                                      | Hatem et al              |
| EPI_ISL_812800 | Genomics Program, Children Cancer Hospital                                                                                                                                       | Genomics Program, Children Cancer Hospital                                                                                                                                      | Hatem et al              |
| EPI_ISL_812804 | Genomics Program, Children Cancer Hospital                                                                                                                                       | Genomics Program, Children Cancer Hospital                                                                                                                                      | Hatem et al              |
| EPI_ISL_812810 | Genomics Program, Children Cancer Hospital                                                                                                                                       | Genomics Program, Children Cancer Hospital                                                                                                                                      | Hatem et al              |
| EPI_ISL_812818 | Genomics Program, Children Cancer Hospital                                                                                                                                       | Genomics Program, Children Cancer Hospital                                                                                                                                      | Hatem et al              |
| EPI_ISL_812823 | Genomics Program, Children Cancer Hospital                                                                                                                                       | Genomics Program, Children Cancer Hospital                                                                                                                                      | Hatem et al              |
| EPI_ISL_812825 | Genomics Program, Children Cancer Hospital                                                                                                                                       | Genomics Program, Children Cancer Hospital                                                                                                                                      | Hatem et al              |
| EPI_ISL_812826 | Genomics Program, Children Cancer Hospital                                                                                                                                       | Genomics Program, Children Cancer Hospital                                                                                                                                      | Hatem et al              |
| EPI_ISL_812827 | Genomics Program, Children Cancer Hospital                                                                                                                                       | Genomics Program, Children Cancer Hospital                                                                                                                                      | Hatem et al              |
| EPI_ISL_812830 | Genomics Program, Children Cancer Hospital                                                                                                                                       | Genomics Program, Children Cancer Hospital                                                                                                                                      | Hatem et al              |
| EPI_ISL_812838 | Genomics Program, Children Cancer Hospital                                                                                                                                       | Genomics Program, Children Cancer Hospital                                                                                                                                      | Hatem et al              |
| EPI_ISL_812839 | Genomics Program, Children Cancer Hospital                                                                                                                                       | Genomics Program, Children Cancer Hospital                                                                                                                                      | Hatem et al              |
| EPI_ISL_812842 | Genomics Program, Children Cancer Hospital                                                                                                                                       | Genomics Program, Children Cancer Hospital                                                                                                                                      | Hatem et al              |
| EPI_ISL_812858 | Genomics Program, Children Cancer Hospital                                                                                                                                       | Genomics Program, Children Cancer Hospital                                                                                                                                      | Hatem et al              |
| EPI_ISL_812859 | Genomics Program, Children Cancer Hospital                                                                                                                                       | Genomics Program, Children Cancer Hospital                                                                                                                                      | Hatem et al              |
| EPI_ISL_812866 | Genomics Program, Children Cancer Hospital                                                                                                                                       | Genomics Program, Children Cancer Hospital                                                                                                                                      | Hatem et al              |
| EPI_ISL_812868 | Genomics Program, Children Cancer Hospital                                                                                                                                       | Genomics Program, Children Cancer Hospital                                                                                                                                      | Hatem et al              |
| EPI_ISL_812872 | Genomics Program, Children Cancer Hospital                                                                                                                                       | Genomics Program, Children Cancer Hospital                                                                                                                                      | Hatem et al              |
| EPI_ISL_794596 | Central Laboratories, Egyptian Ministry of Health and Population                                                                                                                 | Central Laboratories, Egyptian Ministry of Health and Population                                                                                                                | Roshdy et al             |
| EPI_ISL_794594 | Central Laboratories, Egyptian Ministry of Health and Population                                                                                                                 | Central Laboratories, Egyptian Ministry of Health and Population                                                                                                                | Roshdy et al             |

|                |                                                                                |                                                                                |                        |
|----------------|--------------------------------------------------------------------------------|--------------------------------------------------------------------------------|------------------------|
| EPI_ISL_794593 | Central Laboratories, Egyptian Ministry of Health and Population               | Central Laboratories, Egyptian Ministry of Health and Population               | Roshdy et al           |
| EPI_ISL_794604 | Central Laboratories, Egyptian Ministry of Health and Population               | Central Laboratories, Egyptian Ministry of Health and Population               | Kayed et al            |
| EPI_ISL_794603 | Central Laboratories, Egyptian Ministry of Health and Population               | Central Laboratories, Egyptian Ministry of Health and Population               | Kayed et al            |
| EPI_ISL_794602 | Central Laboratories, Egyptian Ministry of Health and Population               | Central Laboratories, Egyptian Ministry of Health and Population               | Kayed et al            |
| EPI_ISL_794606 | Central Public Health Laboratories, Egyptian Ministry of Health and Population | Central Public Health Laboratories, Egyptian Ministry of Health and Population | El-Shesheny et al      |
| EPI_ISL_524427 | Egyptian National Cancer Institute (ENCI)                                      | Egyptian National Cancer Institute (ENCI)                                      | Zekri et al            |
| EPI_ISL_524426 | Egyptian National Cancer Institute (ENCI)                                      | Egyptian National Cancer Institute (ENCI)                                      | Zekri et al            |
| EPI_ISL_469275 | Egyptian National Cancer Institute (ENCI)                                      | Human Genome Center                                                            | Zekri et al            |
| EPI_ISL_468045 | Egyptian National Cancer Institute (ENCI)                                      | Egyptian National Cancer Institute (ENCI)                                      | Zekri et al            |
| EPI_ISL_468053 | Egyptian National Cancer Institute (ENCI)                                      | Egyptian National Cancer Institute (ENCI)                                      | Zekri et al            |
| EPI_ISL_468059 | Egyptian National Cancer Institute (ENCI)                                      | Egyptian National Cancer Institute (ENCI)                                      | Zekri et al            |
| EPI_ISL_468060 | Egyptian National Cancer Institute (ENCI)                                      | Egyptian National Cancer Institute (ENCI)                                      | Zekri et al            |
| EPI_ISL_468056 | Egyptian National Cancer Institute (ENCI)                                      | Egyptian National Cancer Institute (ENCI)                                      | Zekri et al            |
| EPI_ISL_907097 | Cancer Biology Department, National Cancer Institute                           | Cancer Biology Department, National Cancer Institute                           | Zekri et al            |
| EPI_ISL_907098 | Cancer Biology Department, National Cancer Institute                           | Cancer Biology Department, National Cancer Institute                           | Zekri et al            |
| EPI_ISL_907106 | Cancer Biology Department, National Cancer Institute                           | Cancer Biology Department, National Cancer Institute                           | Zekri et al            |
| EPI_ISL_862800 | Cancer Biology Department, National Cancer Institute                           | Cancer Biology Department, National Cancer Institute                           | Zekri et al            |
| EPI_ISL_890216 | Cancer Biology Department, National Cancer Institute                           | Cancer Biology Department, National Cancer Institute                           | Zekri et al            |
| EPI_ISL_890218 | Cancer Biology Department, National Cancer Institute                           | Cancer Biology Department, National Cancer Institute                           | Zekri et al            |
| EPI_ISL_890219 | Cancer Biology Department, National Cancer Institute                           | Cancer Biology Department, National Cancer Institute                           | Zekri et al            |
| EPI_ISL_890223 | Cancer Biology Department, National Cancer Institute                           | Cancer Biology Department, National Cancer Institute                           | Zekri et al            |
| EPI_ISL_890226 | Cancer Biology Department, National Cancer Institute                           | Cancer Biology Department, National Cancer Institute                           | Zekri et al            |
| EPI_ISL_478672 | Egyptian National Cancer Institute (ENCI)                                      | Egyptian National Cancer Institute (ENCI)                                      | Zekri et al            |
| EPI_ISL_475723 | Egyptian National Cancer Institute (ENCI)                                      | Egyptian National Cancer Institute (ENCI)                                      | Zekri et al            |
| EPI_ISL_477161 | Egyptian National Cancer Institute (ENCI)                                      | Egyptian National Cancer Institute (ENCI)                                      | Zekri et al            |
| EPI_ISL_576373 | Cancer Biology Department, National Cancer Institute                           | Cancer Biology Department, National Cancer Institute                           | Zekri et al            |
| EPI_ISL_529143 | Egyptian National Cancer Institute (ENCI)                                      | Egyptian National Cancer Institute (ENCI)                                      | Zekri et al            |
| EPI_ISL_529144 | Egyptian National Cancer Institute (ENCI)                                      | Egyptian National Cancer Institute (ENCI)                                      | Zekri et al            |
| EPI_ISL_857335 | Cancer Biology Department, National Cancer Institute                           | Cancer Biology Department, National Cancer Institute                           | Zekri et al            |
| EPI_ISL_527002 | Biological prevention, army                                                    | Biological prevention, army                                                    | Seadawy et al          |
| EPI_ISL_794634 | Biology, MCL                                                                   | Biology, MCL                                                                   | Seadawy et al          |
| EPI_ISL_526991 | Biological prevention, army                                                    | Biological prevention, army                                                    | Seadawy et al          |
| EPI_ISL_510532 | Biological prevention, army                                                    | Biological prevention, army                                                    | Seadawy et al          |
| EPI_ISL_482759 | Medical Ain Shams Research Institute (MASRI), Ain Shams University             | Medical Ain Shams Research Institute (MASRI), Ain Shams University             | Hesham Elghazaly et al |
| EPI_ISL_482760 | Medical Ain Shams Research Institute (MASRI), Ain Shams University             | Medical Ain Shams Research Institute (MASRI), Ain Shams University             | Hesham Elghazaly et al |
| EPI_ISL_482761 | Medical Ain Shams Research Institute (MASRI), Ain Shams University             | Medical Ain Shams Research Institute (MASRI), Ain Shams University             | Hesham Elghazaly et al |
| EPI_ISL_482762 | Medical Ain Shams Research Institute (MASRI), Ain Shams University             | Medical Ain Shams Research Institute (MASRI), Ain Shams University             | Hesham Elghazaly et al |

|                |                                                                                                                                                                           |                                                                                                                                                                           |                                 |
|----------------|---------------------------------------------------------------------------------------------------------------------------------------------------------------------------|---------------------------------------------------------------------------------------------------------------------------------------------------------------------------|---------------------------------|
| EPI_ISL_482763 | Medical Ain Shams Research Institute (MASRI), Ain Shams University                                                                                                        | Medical Ain Shams Research Institute (MASRI), Ain Shams University                                                                                                        | Hesham Elghazaly et al          |
| EPI_ISL_482764 | Medical Ain Shams Research Institute (MASRI), Ain Shams University                                                                                                        | Medical Ain Shams Research Institute (MASRI), Ain Shams University                                                                                                        | Hesham Elghazaly et al          |
| EPI_ISL_482773 | Medical Ain Shams Research Institute (MASRI), Ain Shams University                                                                                                        | Medical Ain Shams Research Institute (MASRI), Ain Shams University                                                                                                        | Hesham Elghazaly et al          |
| EPI_ISL_430820 | Center of Scientific Excellence for Influenza Viruses, National Research Centre (NRC), Egypt.                                                                             | Center of Scientific Excellence for Influenza Viruses, National Research Centre (NRC), Egypt.                                                                             | Mohamed Ahmed Ali et al         |
| EPI_ISL_430819 | Center of Scientific Excellence for Influenza Viruses, National Research Centre (NRC), Egypt.                                                                             | Center of Scientific Excellence for Influenza Viruses, National Research Centre (NRC), Egypt.                                                                             | Mohamed Ahmed Ali et al         |
| EPI_ISL_671974 | Laboratorio de Virología y Microbiología Molecular, Depto. de Microbiología, Facultad de Medicina, Universidad de El Salvador/INS-laboratorio de Ref. Ministerio de Salud | Laboratorio de Virología y Microbiología Molecular, Depto. de Microbiología, Facultad de Medicina, Universidad de El Salvador/INS-laboratorio de Ref. Ministerio de Salud | Rivera NR et al                 |
| EPI_ISL_407071 | Respiratory Virus Unit, Microbiology Services Colindale, Public Health England                                                                                            | Respiratory Virus Unit, Microbiology Services Colindale, Public Health England                                                                                            | Monica Galiano et al            |
| EPI_ISL_407073 | Respiratory Virus Unit, Microbiology Services Colindale, Public Health England                                                                                            | Respiratory Virus Unit, Microbiology Services Colindale, Public Health England                                                                                            | Monica Galiano et al            |
| EPI_ISL_610245 | Virology, National Institute for Biological Standards and Control                                                                                                         | Virology, National Institute for Biological Standards and Control                                                                                                         | Mee et al                       |
| EPI_ISL_414040 | Respiratory Virus Unit, Microbiology Services Colindale, Public Health England                                                                                            | Respiratory Virus Unit, Microbiology Services Colindale, Public Health England                                                                                            | Monica Galiano et al            |
| EPI_ISL_414041 | Respiratory Virus Unit, Microbiology Services Colindale, Public Health England                                                                                            | Respiratory Virus Unit, Microbiology Services Colindale, Public Health England                                                                                            | Monica Galiano et al            |
| EPI_ISL_414042 | Respiratory Virus Unit, Microbiology Services Colindale, Public Health England                                                                                            | Respiratory Virus Unit, Microbiology Services Colindale, Public Health England                                                                                            | Monica Galiano et al            |
| EPI_ISL_414043 | Respiratory Virus Unit, Microbiology Services Colindale, Public Health England                                                                                            | Respiratory Virus Unit, Microbiology Services Colindale, Public Health England                                                                                            | Monica Galiano et al            |
| EPI_ISL_414044 | Respiratory Virus Unit, Microbiology Services Colindale, Public Health England                                                                                            | Respiratory Virus Unit, Microbiology Services Colindale, Public Health England                                                                                            | Monica Galiano et al            |
| EPI_ISL_464168 | Respiratory Virus Unit, Microbiology Services Colindale, Public Health England                                                                                            | Respiratory Virus Unit, Microbiology Services Colindale, Public Health England                                                                                            | PHE Covid Sequencing Team et al |
| EPI_ISL_464169 | Respiratory Virus Unit, Microbiology Services Colindale, Public Health England                                                                                            | Respiratory Virus Unit, Microbiology Services Colindale, Public Health England                                                                                            | PHE Covid Sequencing Team et al |
| EPI_ISL_464178 | Respiratory Virus Unit, Microbiology Services Colindale, Public Health England                                                                                            | Respiratory Virus Unit, Microbiology Services Colindale, Public Health England                                                                                            | PHE Covid Sequencing Team et al |
| EPI_ISL_464180 | Respiratory Virus Unit, Microbiology Services Colindale, Public Health England                                                                                            | Respiratory Virus Unit, Microbiology Services Colindale, Public Health England                                                                                            | PHE Covid Sequencing Team et al |
| EPI_ISL_464189 | Respiratory Virus Unit, Microbiology Services Colindale, Public Health England                                                                                            | Respiratory Virus Unit, Microbiology Services Colindale, Public Health England                                                                                            | PHE Covid Sequencing Team et al |
| EPI_ISL_414011 | Respiratory Virus Unit, Microbiology Services Colindale, Public Health England                                                                                            | Respiratory Virus Unit, Microbiology Services Colindale, Public Health England                                                                                            | Monica Galiano et al            |
| EPI_ISL_464212 | Respiratory Virus Unit, Microbiology Services Colindale, Public Health England                                                                                            | Respiratory Virus Unit, Microbiology Services Colindale, Public Health England                                                                                            | PHE Covid Sequencing Team et al |
| EPI_ISL_414013 | Respiratory Virus Unit, Microbiology Services Colindale, Public Health England                                                                                            | Respiratory Virus Unit, Microbiology Services Colindale, Public Health England                                                                                            | Monica Galiano et al            |
| EPI_ISL_417215 | Respiratory Virus Unit, Microbiology Services Colindale, Public Health England                                                                                            | Respiratory Virus Unit, Microbiology Services Colindale, Public Health England                                                                                            | Monica Galiano et al            |
| EPI_ISL_464328 | Respiratory Virus Unit, Microbiology Services Colindale, Public Health England                                                                                            | Respiratory Virus Unit, Microbiology Services Colindale, Public Health England                                                                                            | PHE Covid Sequencing Team et al |
| EPI_ISL_464684 | Respiratory Virus Unit, Microbiology Services Colindale, Public Health England                                                                                            | Respiratory Virus Unit, Microbiology Services Colindale, Public Health England                                                                                            | PHE Covid Sequencing Team et al |

|                |                                                                                                                   |                                                                                |                                           |
|----------------|-------------------------------------------------------------------------------------------------------------------|--------------------------------------------------------------------------------|-------------------------------------------|
| EPI_ISL_420728 | Respiratory Virus Unit, Microbiology Services Colindale, Public Health England                                    | Respiratory Virus Unit, Microbiology Services Colindale, Public Health England | Monica Galiano et al                      |
| EPI_ISL_747511 | Respiratory Virus Unit, National Infection Service, Public Health England                                         | COVID-19 Genomics UK (COG-UK) Consortium                                       | PHE Covid Sequencing Team et al           |
| EPI_ISL_747512 | Respiratory Virus Unit, National Infection Service, Public Health England                                         | COVID-19 Genomics UK (COG-UK) Consortium                                       | PHE Covid Sequencing Team et al           |
| EPI_ISL_988688 | Lighthouse Lab in Alderley Park                                                                                   | Wellcome Sanger Institute for the COVID-19 Genomics UK (COG-UK) Consortium     | Jacquelyn Wynn et al                      |
| EPI_ISL_987117 | Lighthouse Lab in Alderley Park                                                                                   | Wellcome Sanger Institute for the COVID-19 Genomics UK (COG-UK) Consortium     | Jacquelyn Wynn et al                      |
| EPI_ISL_986957 | Lighthouse Lab in Alderley Park                                                                                   | Wellcome Sanger Institute for the COVID-19 Genomics UK (COG-UK) Consortium     | Jacquelyn Wynn et al                      |
| EPI_ISL_559405 | Lighthouse Lab in Alderley Park                                                                                   | Wellcome Sanger Institute for the COVID-19 Genomics UK (COG-UK) consortium     | The Lighthouse Lab in Alderley Park et al |
| EPI_ISL_559486 | Lighthouse Lab in Alderley Park                                                                                   | Wellcome Sanger Institute for the COVID-19 Genomics UK (COG-UK) consortium     | The Lighthouse Lab in Alderley Park et al |
| EPI_ISL_559219 | Lighthouse Lab in Alderley Park                                                                                   | Wellcome Sanger Institute for the COVID-19 Genomics UK (COG-UK) consortium     | The Lighthouse Lab in Alderley Park et al |
| EPI_ISL_558683 | Lighthouse Lab in Alderley Park                                                                                   | Wellcome Sanger Institute for the COVID-19 Genomics UK (COG-UK) consortium     | The Lighthouse Lab in Alderley Park et al |
| EPI_ISL_558338 | Lighthouse Lab in Alderley Park                                                                                   | Wellcome Sanger Institute for the COVID-19 Genomics UK (COG-UK) consortium     | The Lighthouse Lab in Alderley Park et al |
| EPI_ISL_558120 | Lighthouse Lab in Alderley Park                                                                                   | Wellcome Sanger Institute for the COVID-19 Genomics UK (COG-UK) consortium     | The Lighthouse Lab in Alderley Park et al |
| EPI_ISL_558093 | Lighthouse Lab in Alderley Park                                                                                   | Wellcome Sanger Institute for the COVID-19 Genomics UK (COG-UK) consortium     | The Lighthouse Lab in Alderley Park et al |
| EPI_ISL_558013 | Lighthouse Lab in Alderley Park                                                                                   | Wellcome Sanger Institute for the COVID-19 Genomics UK (COG-UK) consortium     | The Lighthouse Lab in Alderley Park et al |
| EPI_ISL_555193 | Lighthouse Lab in Alderley Park                                                                                   | Wellcome Sanger Institute for the COVID-19 Genomics UK (COG-UK) consortium     | The Lighthouse Lab in Alderley Park et al |
| EPI_ISL_554428 | Lighthouse Lab in Alderley Park                                                                                   | Wellcome Sanger Institute for the COVID-19 Genomics UK (COG-UK) consortium     | The Lighthouse Lab in Alderley Park et al |
| EPI_ISL_554122 | Lighthouse Lab in Alderley Park                                                                                   | Wellcome Sanger Institute for the COVID-19 Genomics UK (COG-UK) consortium     | The Lighthouse Lab in Alderley Park et al |
| EPI_ISL_555544 | Lighthouse Lab in Alderley Park                                                                                   | Wellcome Sanger Institute for the COVID-19 Genomics UK (COG-UK) consortium     | The Lighthouse Lab in Alderley Park et al |
| EPI_ISL_575581 | Lighthouse Lab in Alderley Park                                                                                   | Wellcome Sanger Institute for the COVID-19 Genomics UK (COG-UK) consortium     | Jacquelyn Wynn et al                      |
| EPI_ISL_566178 | Lighthouse Lab in Alderley Park                                                                                   | Wellcome Sanger Institute for the COVID-19 Genomics UK (COG-UK) consortium     | Jacquelyn Wynn et al                      |
| EPI_ISL_566213 | Lighthouse Lab in Alderley Park                                                                                   | Wellcome Sanger Institute for the COVID-19 Genomics UK (COG-UK) consortium     | Jacquelyn Wynn et al                      |
| EPI_ISL_576611 | Oxford Viromics, NDM, University of Oxford; Oxford University Hospitals; Basingstoke and North Hampshire Hospital | COVID-19 Genomics UK (COG-UK) Consortium                                       | Tanya Golubchik et al                     |
| EPI_ISL_580184 | Lighthouse Lab in Alderley Park                                                                                   | Wellcome Sanger Institute for the COVID-19 Genomics UK (COG-UK) consortium     | Jacquelyn Wynn et al                      |
| EPI_ISL_703236 | Lighthouse Lab in Alderley Park                                                                                   | Wellcome Sanger Institute for the COVID-19 Genomics UK (COG-UK) Consortium     | Jacquelyn Wynn et al                      |
| EPI_ISL_834519 | Lighthouse Lab in Alderley Park                                                                                   | Wellcome Sanger Institute for the COVID-19 Genomics UK (COG-UK) Consortium     | Jacquelyn Wynn et al                      |
| EPI_ISL_529595 | University of Birmingham                                                                                          | COVID-19 Genomics UK (COG-UK) Consortium                                       | Institute of Microbiology et al           |



|                |                                                                                                                      |                                                                                                                      |                                 |
|----------------|----------------------------------------------------------------------------------------------------------------------|----------------------------------------------------------------------------------------------------------------------|---------------------------------|
| EPI_ISL_529475 | University of Birmingham                                                                                             | COVID-19 Genomics UK (COG-UK) Consortium                                                                             | Institute of Microbiology et al |
| EPI_ISL_470097 | Department of Pathology, University of Cambridge                                                                     | Wellcome Sanger Institute for the COVID-19 Genomics UK (COG-UK) consortium                                           | Luke W Meredith et al           |
| EPI_ISL_425373 | Department of Pathology, University of Cambridge                                                                     | COVID-19 Genomics UK (COG-UK) Consortium                                                                             | Luke W Meredith et al           |
| EPI_ISL_442543 | Department of Pathology, University of Cambridge                                                                     | Wellcome Sanger Institute for the COVID-19 Genomics UK (COG-UK) consortium                                           | Luke W Meredith et al           |
| EPI_ISL_980304 | Lighthouse Lab in Cambridge                                                                                          | Wellcome Sanger Institute for the COVID-19 Genomics UK (COG-UK) Consortium                                           | Rob Howes et al                 |
| EPI_ISL_989435 | Lighthouse Lab in Cambridge                                                                                          | Wellcome Sanger Institute for the COVID-19 Genomics UK (COG-UK) Consortium                                           | Rob Howes et al                 |
| EPI_ISL_988018 | Lighthouse Lab in Cambridge                                                                                          | Wellcome Sanger Institute for the COVID-19 Genomics UK (COG-UK) Consortium                                           | Rob Howes et al                 |
| EPI_ISL_987242 | Lighthouse Lab in Cambridge                                                                                          | Wellcome Sanger Institute for the COVID-19 Genomics UK (COG-UK) Consortium                                           | Rob Howes et al                 |
| EPI_ISL_987253 | Lighthouse Lab in Cambridge                                                                                          | Wellcome Sanger Institute for the COVID-19 Genomics UK (COG-UK) Consortium                                           | Rob Howes et al                 |
| EPI_ISL_987237 | Lighthouse Lab in Cambridge                                                                                          | Wellcome Sanger Institute for the COVID-19 Genomics UK (COG-UK) Consortium                                           | Rob Howes et al                 |
| EPI_ISL_986553 | Lighthouse Lab in Cambridge                                                                                          | Wellcome Sanger Institute for the COVID-19 Genomics UK (COG-UK) Consortium                                           | Rob Howes et al                 |
| EPI_ISL_597340 | Lighthouse Lab in Cambridge                                                                                          | Wellcome Sanger Institute for the COVID-19 Genomics UK (COG-UK) consortium                                           | Rob Howes et al                 |
| EPI_ISL_645920 | Lighthouse Lab in Cambridge                                                                                          | Wellcome Sanger Institute for the COVID-19 Genomics UK (COG-UK) Consortium                                           | Rob Howes et al                 |
| EPI_ISL_783520 | Lighthouse Lab in Cambridge                                                                                          | Wellcome Sanger Institute for the COVID-19 Genomics UK (COG-UK) Consortium                                           | Rob Howes et al                 |
| EPI_ISL_723979 | Oxford Viromics, NDM, University of Oxford; Oxford University Hospitals; Basingstoke and North Hampshire Hospital    | COVID-19 Genomics UK (COG-UK) Consortium                                                                             | Tanya Golubchik et al           |
| EPI_ISL_719093 | Lighthouse Lab in Cambridge                                                                                          | Wellcome Sanger Institute for the COVID-19 Genomics UK (COG-UK) Consortium                                           | Rob Howes et al                 |
| EPI_ISL_800514 | Lighthouse Lab in Cambridge                                                                                          | Wellcome Sanger Institute for the COVID-19 Genomics UK (COG-UK) Consortium                                           | Rob Howes et al                 |
| EPI_ISL_811499 | Lighthouse Lab in Cambridge                                                                                          | Wellcome Sanger Institute for the COVID-19 Genomics UK (COG-UK) Consortium                                           | Rob Howes et al                 |
| EPI_ISL_846178 | Lighthouse Lab in Cambridge                                                                                          | Wellcome Sanger Institute for the COVID-19 Genomics UK (COG-UK) Consortium                                           | Rob Howes et al                 |
| EPI_ISL_484033 | Centre for Clinical Infection and Diagnostics Research and Genomics Innovation Unit, Guy's and St. Thomas' NHS Trust | COVID-19 Genomics UK (COG-UK) Consortium                                                                             | Chloe Fisher et al              |
| EPI_ISL_484038 | Centre for Clinical Infection and Diagnostics Research and Genomics Innovation Unit, Guy's and St. Thomas' NHS Trust | COVID-19 Genomics UK (COG-UK) Consortium                                                                             | Chloe Fisher et al              |
| EPI_ISL_484077 | Centre for Clinical Infection and Diagnostics Research and Genomics Innovation Unit, Guy's and St. Thomas' NHS Trust | COVID-19 Genomics UK (COG-UK) Consortium                                                                             | Chloe Fisher et al              |
| EPI_ISL_560685 | Centre for Clinical Infection and Diagnostics Research and Genomics Innovation Unit, Guy's and St. Thomas' NHS Trust | Centre for Clinical Infection and Diagnostics Research and Genomics Innovation Unit, Guy's and St. Thomas' NHS Trust | Chloe Fisher et al              |
| EPI_ISL_478358 | University Hospitals Of Leicester NHS Trust and DeepSeq Nottingham                                                   | COVID-19 Genomics UK (COG-UK) Consortium                                                                             | Christopher Holmes et al        |
| EPI_ISL_572737 | Liverpool Clinical Laboratories                                                                                      | COVID-19 Genomics UK (COG-UK) Consortium                                                                             | Sam Haldenby et al              |
| EPI_ISL_584594 | Liverpool Clinical Laboratories                                                                                      | COVID-19 Genomics UK (COG-UK) Consortium                                                                             | Sam Haldenby et al              |
| EPI_ISL_472006 | Liverpool Clinical Laboratories                                                                                      | COVID-19 Genomics UK (COG-UK) Consortium                                                                             | Sam Haldenby et al              |
| EPI_ISL_472016 | Liverpool Clinical Laboratories                                                                                      | COVID-19 Genomics UK (COG-UK) Consortium                                                                             | Sam Haldenby et al              |

|                |                                                                                                                                                                                                 |                                                                            |                                           |
|----------------|-------------------------------------------------------------------------------------------------------------------------------------------------------------------------------------------------|----------------------------------------------------------------------------|-------------------------------------------|
| EPI_ISL_499999 | Liverpool Clinical Laboratories                                                                                                                                                                 | COVID-19 Genomics UK (COG-UK) Consortium                                   | Sam Haldenby et al                        |
| EPI_ISL_500009 | Liverpool Clinical Laboratories                                                                                                                                                                 | COVID-19 Genomics UK (COG-UK) Consortium                                   | Sam Haldenby et al                        |
| EPI_ISL_500073 | Liverpool Clinical Laboratories                                                                                                                                                                 | COVID-19 Genomics UK (COG-UK) Consortium                                   | Sam Haldenby et al                        |
| EPI_ISL_500084 | Liverpool Clinical Laboratories                                                                                                                                                                 | COVID-19 Genomics UK (COG-UK) Consortium                                   | Sam Haldenby et al                        |
| EPI_ISL_517357 | Liverpool Clinical Laboratories                                                                                                                                                                 | COVID-19 Genomics UK (COG-UK) Consortium                                   | Sam Haldenby et al                        |
| EPI_ISL_507064 | University College London Hospital                                                                                                                                                              | COVID-19 Genomics UK (COG-UK) Consortium                                   | Judith Heaney et al                       |
| EPI_ISL_507079 | University College London Hospital, Great Ormond Street Hospital for Children NHS Foundation Trust, Imperial College Healthcare NHS Trust                                                       | COVID-19 Genomics UK (COG-UK) Consortium                                   | Judith Heaney et al                       |
| EPI_ISL_949901 |                                                                                                                                                                                                 | COVID-19 Genomics UK (COG-UK) Consortium                                   | Sergi Castellano et al                    |
| EPI_ISL_986008 | Lighthouse Lab in Milton Keynes                                                                                                                                                                 | Wellcome Sanger Institute for the COVID-19 Genomics UK (COG-UK) Consortium | The Lighthouse Lab in Milton Keynes et al |
| EPI_ISL_557483 | Lighthouse Lab in Milton Keynes                                                                                                                                                                 | Wellcome Sanger Institute for the COVID-19 Genomics UK (COG-UK) consortium | The Lighthouse Lab in Milton Keynes et al |
| EPI_ISL_549833 | Lighthouse Lab in Milton Keynes                                                                                                                                                                 | Wellcome Sanger Institute for the COVID-19 Genomics UK (COG-UK) consortium | The Lighthouse Lab in Milton Keynes et al |
| EPI_ISL_550741 | Lighthouse Lab in Milton Keynes                                                                                                                                                                 | Wellcome Sanger Institute for the COVID-19 Genomics UK (COG-UK) consortium | The Lighthouse Lab in Milton Keynes et al |
| EPI_ISL_573249 | Virology Department, Royal Infirmary of Edinburgh, NHS Lothian / School of Biological Sciences, University of Edinburgh / Institute of Genetics and Molecular Medicine, University of Edinburgh | COVID-19 Genomics UK (COG-UK) Consortium                                   | McHugh M et al                            |
| EPI_ISL_550941 | Lighthouse Lab in Milton Keynes                                                                                                                                                                 | Wellcome Sanger Institute for the COVID-19 Genomics UK (COG-UK) consortium | The Lighthouse Lab in Milton Keynes et al |
| EPI_ISL_566982 | Lighthouse Lab in Milton Keynes                                                                                                                                                                 | Wellcome Sanger Institute for the COVID-19 Genomics UK (COG-UK) consortium | The Lighthouse Lab in Milton Keynes et al |
| EPI_ISL_631036 | Lighthouse Lab in Milton Keynes                                                                                                                                                                 | Wellcome Sanger Institute for the COVID-19 Genomics UK (COG-UK) consortium | The Lighthouse Lab in Milton Keynes et al |
| EPI_ISL_630998 | Lighthouse Lab in Milton Keynes                                                                                                                                                                 | Wellcome Sanger Institute for the COVID-19 Genomics UK (COG-UK) consortium | The Lighthouse Lab in Milton Keynes et al |
| EPI_ISL_629164 | Lighthouse Lab in Milton Keynes                                                                                                                                                                 | Wellcome Sanger Institute for the COVID-19 Genomics UK (COG-UK) consortium | The Lighthouse Lab in Milton Keynes et al |
| EPI_ISL_651545 | Oxford Viromics, NDM, University of Oxford; Oxford University Hospitals; Basingstoke and North Hampshire Hospital                                                                               | COVID-19 Genomics UK (COG-UK) Consortium                                   | Tanya Golubchik et al                     |
| EPI_ISL_652142 | Oxford Viromics, NDM, University of Oxford; Oxford University Hospitals; Basingstoke and North Hampshire Hospital                                                                               | COVID-19 Genomics UK (COG-UK) Consortium                                   | Tanya Golubchik et al                     |
| EPI_ISL_724804 | Oxford Viromics, NDM, University of Oxford; Oxford University Hospitals; Basingstoke and North Hampshire Hospital                                                                               | COVID-19 Genomics UK (COG-UK) Consortium                                   | Tanya Golubchik et al                     |
| EPI_ISL_724807 | Oxford Viromics, NDM, University of Oxford; Oxford University Hospitals; Basingstoke and North Hampshire Hospital                                                                               | COVID-19 Genomics UK (COG-UK) Consortium                                   | Tanya Golubchik et al                     |
| EPI_ISL_799806 | Lighthouse Lab in Milton Keynes                                                                                                                                                                 | Wellcome Sanger Institute for the COVID-19 Genomics UK (COG-UK) Consortium | The Lighthouse Lab in Milton Keynes et al |
| EPI_ISL_798339 | Lighthouse Lab in Milton Keynes                                                                                                                                                                 | Wellcome Sanger Institute for the COVID-19 Genomics UK (COG-UK) Consortium | The Lighthouse Lab in Milton Keynes et al |
| EPI_ISL_812022 | Lighthouse Lab in Milton Keynes                                                                                                                                                                 | Wellcome Sanger Institute for the COVID-19 Genomics UK (COG-UK) Consortium | The Lighthouse Lab in Milton Keynes et al |
| EPI_ISL_457344 | Quadram Institute Bioscience                                                                                                                                                                    | COVID-19 Genomics UK (COG-UK) Consortium                                   | Dave J. Baker et al                       |
| EPI_ISL_457383 | Quadram Institute Bioscience                                                                                                                                                                    | COVID-19 Genomics UK (COG-UK) Consortium                                   | Dave J. Baker et al                       |
| EPI_ISL_457462 | Quadram Institute Bioscience                                                                                                                                                                    | COVID-19 Genomics UK (COG-UK) Consortium                                   | Dave J. Baker et al                       |
| EPI_ISL_457547 | Quadram Institute Bioscience                                                                                                                                                                    | COVID-19 Genomics UK (COG-UK) Consortium                                   | Dave J. Baker et al                       |

|                |                                                                                                                                                                                  |                                                                            |                            |
|----------------|----------------------------------------------------------------------------------------------------------------------------------------------------------------------------------|----------------------------------------------------------------------------|----------------------------|
| EPI_ISL_457558 | Quadram Institute Bioscience                                                                                                                                                     | COVID-19 Genomics UK (COG-UK) Consortium                                   | Dave J. Baker et al        |
| EPI_ISL_457560 | Quadram Institute Bioscience                                                                                                                                                     | COVID-19 Genomics UK (COG-UK) Consortium                                   | Dave J. Baker et al        |
| EPI_ISL_425635 | Queens Medical Centre, Clinical Microbiology Department / DeepSeq Nottingham                                                                                                     | COVID-19 Genomics UK (COG-UK) Consortium                                   | Gemma Clark et al          |
| EPI_ISL_534783 | Oxford Viromics, NDM, University of Oxford; Oxford University Hospitals; Basingstoke and North Hampshire Hospital                                                                | COVID-19 Genomics UK (COG-UK) Consortium                                   | Tanya Golubchik et al      |
| EPI_ISL_986270 | Lighthouse Lab in Glasgow                                                                                                                                                        | Wellcome Sanger Institute for the COVID-19 Genomics UK (COG-UK) Consortium | Harper VanSteenhouse et al |
| EPI_ISL_532265 | Lighthouse Lab in Glasgow                                                                                                                                                        | Wellcome Sanger Institute for the COVID-19 Genomics UK (COG-UK) consortium | Harper VanSteenhouse et al |
| EPI_ISL_532236 | Lighthouse Lab in Glasgow                                                                                                                                                        | Wellcome Sanger Institute for the COVID-19 Genomics UK (COG-UK) consortium | Harper VanSteenhouse et al |
| EPI_ISL_533219 | Lighthouse Lab in Glasgow                                                                                                                                                        | Wellcome Sanger Institute for the COVID-19 Genomics UK (COG-UK) consortium | Harper VanSteenhouse et al |
| EPI_ISL_532011 | Lighthouse Lab in Glasgow                                                                                                                                                        | Wellcome Sanger Institute for the COVID-19 Genomics UK (COG-UK) consortium | Harper VanSteenhouse et al |
| EPI_ISL_531837 | Lighthouse Lab in Glasgow                                                                                                                                                        | Wellcome Sanger Institute for the COVID-19 Genomics UK (COG-UK) consortium | Harper VanSteenhouse et al |
| EPI_ISL_530496 | Lighthouse Lab in Glasgow                                                                                                                                                        | Wellcome Sanger Institute for the COVID-19 Genomics UK (COG-UK) consortium | Harper VanSteenhouse et al |
| EPI_ISL_530498 | Lighthouse Lab in Glasgow                                                                                                                                                        | Wellcome Sanger Institute for the COVID-19 Genomics UK (COG-UK) consortium | Harper VanSteenhouse et al |
| EPI_ISL_549528 | Oxford Viromics, NDM, University of Oxford; Oxford University Hospitals; Basingstoke and North Hampshire Hospital                                                                | COVID-19 Genomics UK (COG-UK) Consortium                                   | Tanya Golubchik et al      |
| EPI_ISL_590662 | Lighthouse Lab in Glasgow                                                                                                                                                        | Wellcome Sanger Institute for the COVID-19 Genomics UK (COG-UK) consortium | Harper VanSteenhouse et al |
| EPI_ISL_567404 | Lighthouse Lab in Glasgow                                                                                                                                                        | Wellcome Sanger Institute for the COVID-19 Genomics UK (COG-UK) consortium | Harper VanSteenhouse et al |
| EPI_ISL_567526 | Lighthouse Lab in Glasgow                                                                                                                                                        | Wellcome Sanger Institute for the COVID-19 Genomics UK (COG-UK) consortium | Harper VanSteenhouse et al |
| EPI_ISL_588724 | Lighthouse Lab in Glasgow                                                                                                                                                        | Wellcome Sanger Institute for the COVID-19 Genomics UK (COG-UK) consortium | Harper VanSteenhouse et al |
| EPI_ISL_599360 | Lighthouse Lab in Glasgow                                                                                                                                                        | Wellcome Sanger Institute for the COVID-19 Genomics UK (COG-UK) consortium | Harper VanSteenhouse et al |
| EPI_ISL_587521 | Lighthouse Lab in Glasgow                                                                                                                                                        | Wellcome Sanger Institute for the COVID-19 Genomics UK (COG-UK) consortium | Harper VanSteenhouse et al |
| EPI_ISL_706932 | Oxford Viromics, NDM, University of Oxford; Oxford University Hospitals; Basingstoke and North Hampshire Hospital                                                                | COVID-19 Genomics UK (COG-UK) Consortium                                   | Tanya Golubchik et al      |
| EPI_ISL_638782 | Oxford Viromics, NDM, University of Oxford; Oxford University Hospitals; Basingstoke and North Hampshire Hospital                                                                | COVID-19 Genomics UK (COG-UK) Consortium                                   | Tanya Golubchik et al      |
| EPI_ISL_953018 | Virology Department, Sheffield Teaching Hospitals NHS Foundation Trust/Department of Infection, Immunity and Cardiovascular Disease, The Medical School, University of Sheffield | COVID-19 Genomics UK (COG-UK) Consortium                                   | Thushan de Silva et al     |
| EPI_ISL_649155 | Laboratorio de Investigaciones de Baney                                                                                                                                          | University Hospital Basel, Clinical Bacteriology                           | Carlos Cortes et al        |
| EPI_ISL_648304 | Laboratorio de Investigaciones de Baney                                                                                                                                          | University Hospital Basel, Clinical Bacteriology                           | Carlos Cortes et al        |
| EPI_ISL_648307 | Laboratorio de Investigaciones de Baney                                                                                                                                          | University Hospital Basel, Clinical Bacteriology                           | Carlos Cortes et al        |
| EPI_ISL_648308 | Laboratorio de Investigaciones de Baney                                                                                                                                          | University Hospital Basel, Clinical Bacteriology                           | Carlos Cortes et al        |
| EPI_ISL_648309 | Laboratorio de Investigaciones de Baney                                                                                                                                          | University Hospital Basel, Clinical Bacteriology                           | Carlos Cortes et al        |
| EPI_ISL_648311 | Laboratorio de Investigaciones de Baney                                                                                                                                          | University Hospital Basel, Clinical Bacteriology                           | Carlos Cortes et al        |















|                |                                                                                                      |                                                                                          |                               |
|----------------|------------------------------------------------------------------------------------------------------|------------------------------------------------------------------------------------------|-------------------------------|
| EPI_ISL_660351 | CHU de Saint-Étienne Hôpital Nord                                                                    | CNR Virus des Infections Respiratoires - France SUD                                      | Antonin Bal et al             |
| EPI_ISL_779821 | Laboratoire de virologie, CHU de Grenoble                                                            | CNR Virus des Infections Respiratoires - France SUD                                      | Antonin Bal et al             |
| EPI_ISL_639989 | CNR Virus des Infections Respiratoires - France SUD                                                  | CNR Virus des Infections Respiratoires - France SUD                                      | Antonin Bal et al             |
| EPI_ISL_718231 | Hospital                                                                                             | National Reference Center for Viruses of Respiratory Infections, Institut Pasteur, Paris | Marion Barbet et al           |
| EPI_ISL_832194 | Laboratory Analyses Med                                                                              | National Reference Center for Viruses of Respiratory Infections, Institut Pasteur, Paris | Marion Barbet et al           |
| EPI_ISL_832195 | Laboratory Analyses Med                                                                              | National Reference Center for Viruses of Respiratory Infections, Institut Pasteur, Paris | Marion Barbet et al           |
| EPI_ISL_888828 | General practitioner office                                                                          | National Reference Center for Viruses of Respiratory Infections, Institut Pasteur, Paris | Marion Barbet et al           |
| EPI_ISL_735391 | CHU Tours                                                                                            | CNR Virus des Infections Respiratoires - France SUD                                      | Antonin Bal et al             |
| EPI_ISL_414623 | Laboratoire de Virologie Institut de Virologie - INSERM U 1109 Hôpitaux Universitaires de Strasbourg | National Reference Center for Viruses of Respiratory Infections, Institut Pasteur, Paris | Mélnie Albert et al           |
| EPI_ISL_414600 | Laboratoire de Virologie Institut de Virologie - INSERM U 1109 Hôpitaux Universitaires de Strasbourg | National Reference Center for Viruses of Respiratory Infections, Institut Pasteur, Paris | Mélnie Albert et al           |
| EPI_ISL_428348 | Maison de Santé du Val d'Ormois                                                                      | National Reference Center for Viruses of Respiratory Infections, Institut Pasteur, Paris | Mélanie Albert et al          |
| EPI_ISL_560635 | Hospital                                                                                             | National Reference Center for Viruses of Respiratory Infections, Institut Pasteur, Paris | Sylvie Behillil et al         |
| EPI_ISL_414629 | Centre Hospitalier Compiègne Laboratoire de Biologie                                                 | National Reference Center for Viruses of Respiratory Infections, Institut Pasteur, Paris | Mélnie Albert et al           |
| EPI_ISL_614284 | General practitioner                                                                                 | National Reference Center for Viruses of Respiratory Infections, Institut Pasteur, Paris | Marion Barbet et al           |
| EPI_ISL_437690 | Laboratory for Urgent Response to Biological Threats                                                 | Institut Pasteur CIBU /ERI                                                               | V. Caro et al                 |
| EPI_ISL_410720 | Department of Infectious and Tropical Diseases, Bichat Claude Bernard Hospital, Paris                | National Reference Center for Viruses of Respiratory Infections, Institut Pasteur, Paris | Mélanie Albert et al          |
| EPI_ISL_406596 | Department of Infectious and Tropical Diseases, Bichat Claude Bernard Hospital, Paris                | National Reference Center for Viruses of Respiratory Infections, Institut Pasteur, Paris | Mélanie Albert et al          |
| EPI_ISL_411220 | Department of Infectious and Tropical Diseases, Bichat Claude Bernard Hospital, Paris                | Laboratoire Virpath, CIRI U111, UCBL1, INSERM, CNRS, ENS Lyon                            | Olivier Terrier et al         |
| EPI_ISL_408431 | Sorbonne Université, Inserm et Assistance Publique-Hôpitaux de Paris (Pitié Salpêtrière)             | National Reference Center for Viruses of Respiratory Infections, Institut Pasteur, Paris | Mélanie Albert et al          |
| EPI_ISL_560637 | Labo Analyses Med                                                                                    | National Reference Center for Viruses of Respiratory Infections, Institut Pasteur, Paris | Sylvie Behillil et al         |
| EPI_ISL_560639 | Labo Analyses Med                                                                                    | National Reference Center for Viruses of Respiratory Infections, Institut Pasteur, Paris | Sylvie Behillil et al         |
| EPI_ISL_560641 | Labo Analyses Med                                                                                    | National Reference Center for Viruses of Respiratory Infections, Institut Pasteur, Paris | Sylvie Behillil et al         |
| EPI_ISL_437689 | Laboratory for Urgent Response to Biological Threats                                                 | Institut Pasteur CIBU / ERI                                                              | V. Caro et al                 |
| EPI_ISL_833195 | Hôpital Bichat Claude Bernard, Laboratoire de Virologie                                              | IAME UMR1137 Inserm, Université de Paris, Hôpital Bichat                                 | Antoine Bridier et al         |
| EPI_ISL_833197 | Hôpital Bichat Claude Bernard, Laboratoire de Virologie                                              | IAME UMR1137 Inserm, Université de Paris, Hôpital Bichat                                 | Antoine Bridier et al         |
| EPI_ISL_940274 | Hôpital Bichat Claude Bernard, Laboratoire de Virologie                                              | IAME UMR1137 Inserm, Université de Paris, Hôpital Bichat                                 | Antoine Bridier-Nahmias et al |
| EPI_ISL_940543 | Hôpital Bichat Claude Bernard, Laboratoire de Virologie                                              | IAME UMR1137 Inserm, Université de Paris, Hôpital Bichat                                 | Antoine Bridier-Nahmias et al |
| EPI_ISL_940542 | Hôpital Bichat Claude Bernard, Laboratoire de Virologie                                              | IAME UMR1137 Inserm, Université de Paris, Hôpital Bichat                                 | Antoine Bridier-Nahmias et al |
| EPI_ISL_940533 | Hôpital Bichat Claude Bernard, Laboratoire de Virologie                                              | IAME UMR1137 Inserm, Université de Paris, Hôpital Bichat                                 | Antoine Bridier-Nahmias et al |
| EPI_ISL_940293 | Hôpital Bichat Claude Bernard, Laboratoire de Virologie                                              | IAME UMR1137 Inserm, Université de Paris, Hôpital Bichat                                 | Antoine Bridier-Nahmias et al |

|                |                                                                        |                                                                                          |                               |
|----------------|------------------------------------------------------------------------|------------------------------------------------------------------------------------------|-------------------------------|
| EPI_ISL_940160 | Hôpital Bichat Claude Bernard, Laboratoire de Virologie                | IAME UMR1137 Inserm, Université de Paris, Hôpital Bichat                                 | Antoine Bridier-Nahmias et al |
| EPI_ISL_940539 | Hôpital Bichat Claude Bernard, Laboratoire de Virologie                | IAME UMR1137 Inserm, Université de Paris, Hôpital Bichat                                 | Antoine Bridier-Nahmias et al |
| EPI_ISL_940540 | Hôpital Bichat Claude Bernard, Laboratoire de Virologie                | IAME UMR1137 Inserm, Université de Paris, Hôpital Bichat                                 | Antoine Bridier-Nahmias et al |
| EPI_ISL_940196 | Hôpital Bichat Claude Bernard, Laboratoire de Virologie                | IAME UMR1137 Inserm, Université de Paris, Hôpital Bichat                                 | Antoine Bridier-Nahmias et al |
| EPI_ISL_940506 | Hôpital Bichat Claude Bernard, Laboratoire de Virologie                | IAME UMR1137 Inserm, Université de Paris, Hôpital Bichat                                 | Antoine Bridier-Nahmias et al |
| EPI_ISL_940203 | Hôpital Bichat Claude Bernard, Laboratoire de Virologie                | IAME UMR1137 Inserm, Université de Paris, Hôpital Bichat                                 | Antoine Bridier-Nahmias et al |
| EPI_ISL_940207 | Hôpital Bichat Claude Bernard, Laboratoire de Virologie                | IAME UMR1137 Inserm, Université de Paris, Hôpital Bichat                                 | Antoine Bridier-Nahmias et al |
| EPI_ISL_940177 | Hôpital Bichat Claude Bernard, Laboratoire de Virologie                | IAME UMR1137 Inserm, Université de Paris, Hôpital Bichat                                 | Antoine Bridier-Nahmias et al |
| EPI_ISL_940165 | Hôpital Bichat Claude Bernard, Laboratoire de Virologie                | IAME UMR1137 Inserm, Université de Paris, Hôpital Bichat                                 | Antoine Bridier-Nahmias et al |
| EPI_ISL_940340 | Hôpital Bichat Claude Bernard, Laboratoire de Virologie                | IAME UMR1137 Inserm, Université de Paris, Hôpital Bichat                                 | Antoine Bridier-Nahmias et al |
| EPI_ISL_649960 | CHU Bordeaux                                                           | CNR Virus des Infections Respiratoires - France SUD                                      | Antonin Bal et al             |
| EPI_ISL_649963 | CHU Bordeaux                                                           | CNR Virus des Infections Respiratoires - France SUD                                      | Antonin Bal et al             |
| EPI_ISL_663215 | CHU de Limoges                                                         | CNR Virus des Infections Respiratoires - France SUD                                      | Antonin Bal et al             |
| EPI_ISL_663216 | CHU de Limoges                                                         | CNR Virus des Infections Respiratoires - France SUD                                      | Antonin Bal et al             |
| EPI_ISL_779844 | CHU Bordeaux                                                           | CNR Virus des Infections Respiratoires - France SUD                                      | Antonin Bal et al             |
| EPI_ISL_414624 | Centre Hositalier Universitaire de Rouen Laboratoire de Virologie      | National Reference Center for Viruses of Respiratory Infections, Institut Pasteur, Paris | Mélnie Albert et al           |
| EPI_ISL_416494 | Centre Hositalier Universitaire de Rouen Laboratoire de Virologie      | National Reference Center for Viruses of Respiratory Infections, Institut Pasteur, Paris | Mélnie Albert et al           |
| EPI_ISL_593868 | CHU Purpan - Laboratoire de Virologie - Institut Fédératif de Biologie | CHU Purpan - Laboratoire de Virologie - Institut Fédératif de Biologie                   | Latour J. et al               |
| EPI_ISL_593869 | CHU Purpan - Laboratoire de Virologie - Institut Fédératif de Biologie | CHU Purpan - Laboratoire de Virologie - Institut Fédératif de Biologie                   | Latour J. et al               |
| EPI_ISL_593875 | CHU Purpan - Laboratoire de Virologie - Institut Fédératif de Biologie | CHU Purpan - Laboratoire de Virologie - Institut Fédératif de Biologie                   | Latour J. et al               |
| EPI_ISL_593876 | CHU Purpan - Laboratoire de Virologie - Institut Fédératif de Biologie | CHU Purpan - Laboratoire de Virologie - Institut Fédératif de Biologie                   | Latour J. et al               |
| EPI_ISL_593878 | CHU Purpan - Laboratoire de Virologie - Institut Fédératif de Biologie | CHU Purpan - Laboratoire de Virologie - Institut Fédératif de Biologie                   | Latour J. et al               |
| EPI_ISL_593895 | CHU Purpan - Laboratoire de Virologie - Institut Fédératif de Biologie | CHU Purpan - Laboratoire de Virologie - Institut Fédératif de Biologie                   | Latour J. et al               |
| EPI_ISL_671943 | CHU Purpan - Laboratoire de Virologie - Institut Fédératif de Biologie | CHU Purpan - Laboratoire de Virologie - Institut Fédératif de Biologie                   | Latour J. et al               |
| EPI_ISL_660708 | CHU Montpellier                                                        | CNR Virus des Infections Respiratoires - France SUD                                      | Antonin Bal et al             |
| EPI_ISL_569596 | MEPHI, Aix Marseille University                                        | MEPHI, Aix Marseille University                                                          | Anthony LEVASSEUR et al       |
| EPI_ISL_568917 | MEPHI, Aix Marseille University                                        | MEPHI, Aix Marseille University                                                          | Anthony LEVASSEUR et al       |
| EPI_ISL_568978 | MEPHI, Aix Marseille University                                        | MEPHI, Aix Marseille University                                                          | Anthony LEVASSEUR et al       |
| EPI_ISL_568994 | MEPHI, Aix Marseille University                                        | MEPHI, Aix Marseille University                                                          | Anthony LEVASSEUR et al       |
| EPI_ISL_569080 | MEPHI, Aix Marseille University                                        | MEPHI, Aix Marseille University                                                          | Anthony LEVASSEUR et al       |
| EPI_ISL_569124 | MEPHI, Aix Marseille University                                        | MEPHI, Aix Marseille University                                                          | Anthony LEVASSEUR et al       |
| EPI_ISL_569162 | MEPHI, Aix Marseille University                                        | MEPHI, Aix Marseille University                                                          | Anthony LEVASSEUR et al       |
| EPI_ISL_569165 | MEPHI, Aix Marseille University                                        | MEPHI, Aix Marseille University                                                          | Anthony LEVASSEUR et al       |
| EPI_ISL_982916 | MEPHI Aix Marseille University (AMU)                                   | MEPHI Aix Marseille University (AMU)                                                     | Anthony LEVASSEUR et al       |
| EPI_ISL_982914 | MEPHI Aix Marseille University (AMU)                                   | MEPHI Aix Marseille University (AMU)                                                     | Anthony LEVASSEUR et al       |
| EPI_ISL_900080 | MEPHI, Aix Marseille University                                        | MEPHI, Aix Marseille University                                                          | Anthony LEVASSEUR et al       |
| EPI_ISL_896138 | MEPHI, Aix Marseille University                                        | MEPHI, Aix Marseille University                                                          | Anthony LEVASSEUR et al       |
| EPI_ISL_804492 | MEPHI, Aix Marseille University                                        | MEPHI, Aix Marseille University                                                          | Anthony LEVASSEUR et al       |

|                |                                                     |                                                                                                                                  |                            |
|----------------|-----------------------------------------------------|----------------------------------------------------------------------------------------------------------------------------------|----------------------------|
| EPI_ISL_900119 | MEPHI, Aix Marseille University                     | MEPHI, Aix Marseille University                                                                                                  | Anthony LEVASSEUR et al    |
| EPI_ISL_804527 | MEPHI, Aix Marseille University                     | MEPHI, Aix Marseille University                                                                                                  | Anthony LEVASSEUR et al    |
| EPI_ISL_804532 | MEPHI, Aix Marseille University                     | MEPHI, Aix Marseille University                                                                                                  | Anthony LEVASSEUR et al    |
| EPI_ISL_804574 | MEPHI, Aix Marseille University                     | MEPHI, Aix Marseille University                                                                                                  | Anthony LEVASSEUR et al    |
| EPI_ISL_804576 | MEPHI, Aix Marseille University                     | MEPHI, Aix Marseille University                                                                                                  | Anthony LEVASSEUR et al    |
| EPI_ISL_804582 | MEPHI, Aix Marseille University                     | MEPHI, Aix Marseille University                                                                                                  | Anthony LEVASSEUR et al    |
| EPI_ISL_804478 | MEPHI, Aix Marseille University                     | MEPHI, Aix Marseille University                                                                                                  | Anthony LEVASSEUR et al    |
| EPI_ISL_644458 | MEPHI, Aix Marseille University                     | MEPHI, Aix Marseille University                                                                                                  | Anthony LEVASSEUR et al    |
| EPI_ISL_644463 | MEPHI, Aix Marseille University                     | MEPHI, Aix Marseille University                                                                                                  | Anthony LEVASSEUR et al    |
| EPI_ISL_644464 | MEPHI, Aix Marseille University                     | MEPHI, Aix Marseille University                                                                                                  | Anthony LEVASSEUR et al    |
| EPI_ISL_644478 | MEPHI, Aix Marseille University                     | MEPHI, Aix Marseille University                                                                                                  | Anthony LEVASSEUR et al    |
| EPI_ISL_644555 | MEPHI, Aix Marseille University                     | MEPHI, Aix Marseille University                                                                                                  | Anthony LEVASSEUR et al    |
| EPI_ISL_644563 | MEPHI, Aix Marseille University                     | MEPHI, Aix Marseille University                                                                                                  | Anthony LEVASSEUR et al    |
| EPI_ISL_639975 | CNR Virus des Infections Respiratoires - France SUD | CNR Virus des Infections Respiratoires - France SUD                                                                              | Antonin Bal et al          |
| EPI_ISL_644711 | Unité des Virus Émergents                           | CNR Virus des Infections Respiratoires - France SUD                                                                              | Antonin Bal et al          |
| EPI_ISL_644712 | Unité des Virus Émergents                           | CNR Virus des Infections Respiratoires - France SUD                                                                              | Antonin Bal et al          |
| EPI_ISL_660740 | Unité des Virus Émergents                           | CNR Virus des Infections Respiratoires - France SUD                                                                              | Antonin Bal et al          |
| EPI_ISL_768829 | Hôpital d'Instruction des Armées Sainte-Anne        | CNR Virus des Infections Respiratoires - France SUD                                                                              | Antonin Bal et al          |
| EPI_ISL_913666 | Cerballiance                                        | CNR Virus des Infections Respiratoires - France SUD                                                                              | Antonin Bal et al          |
| EPI_ISL_693388 | CHU de Nice - Hôpital Archet 2                      | CNR Virus des Infections Respiratoires - France SUD                                                                              | Antonin Bal et al          |
| EPI_ISL_663270 | CHU Nantes                                          | CNR Virus des Infections Respiratoires - France SUD                                                                              | Antonin Bal et al          |
| EPI_ISL_982195 | Hôpital Henri Mondor                                | Service de Virologie, Hôpital Henri Mondor, Assistance Publique Hôpitaux de Paris, Université Paris-Est Créteil, INSERM U955     | Christophe Rodriguez et al |
| EPI_ISL_981531 | Groupe LCD                                          | Département de Virologie, Hôpital Henri Mondor, Assistance Publique Hôpitaux de Paris, Université Paris-Est Créteil, INSERM U955 | Christophe Rodriguez et al |
| EPI_ISL_981516 | Groupe LCD                                          | Département de Virologie, Hôpital Henri Mondor, Assistance Publique Hôpitaux de Paris, Université Paris-Est Créteil, INSERM U955 | Christophe Rodriguez et al |
| EPI_ISL_981523 | Groupe LCD                                          | Département de Virologie, Hôpital Henri Mondor, Assistance Publique Hôpitaux de Paris, Université Paris-Est Créteil, INSERM U955 | Christophe Rodriguez et al |
| EPI_ISL_981524 | Groupe LCD                                          | Département de Virologie, Hôpital Henri Mondor, Assistance Publique Hôpitaux de Paris, Université Paris-Est Créteil, INSERM U955 | Christophe Rodriguez et al |
| EPI_ISL_981432 | Groupe LCD                                          | Département de Virologie, Hôpital Henri Mondor, Assistance Publique Hôpitaux de Paris, Université Paris-Est Créteil, INSERM U955 | Christophe Rodriguez et al |
| EPI_ISL_981423 | Groupe LCD                                          | Département de Virologie, Hôpital Henri Mondor, Assistance Publique Hôpitaux de Paris, Université Paris-Est Créteil, INSERM U955 | Christophe Rodriguez et al |
| EPI_ISL_982327 | Hôpital Henri Mondor                                | Service de Virologie, Hôpital Henri Mondor, Assistance Publique Hôpitaux de Paris, Université Paris-Est Créteil, INSERM U955     | Christophe Rodriguez et al |
| EPI_ISL_883998 | Labo Analyses Med                                   | National Reference Center for Viruses of Respiratory Infections, Institut Pasteur, Paris                                         | Marion Barbet et al        |
| EPI_ISL_890353 | Labo Analyses Med                                   | National Reference Center for Viruses of Respiratory Infections, Institut Pasteur, Paris                                         | Marion Barbet et al        |
| EPI_ISL_883999 | Labo Analyses Med                                   | National Reference Center for Viruses of Respiratory Infections, Institut Pasteur, Paris                                         | Marion Barbet et al        |
| EPI_ISL_884004 | Labo Analyses Med                                   | National Reference Center for Viruses of Respiratory Infections, Institut Pasteur, Paris                                         | Marion Barbet et al        |

|                 |                                                      |                                                                                                 |                         |
|-----------------|------------------------------------------------------|-------------------------------------------------------------------------------------------------|-------------------------|
| EPI_ISL_954098  | Outre Mer                                            | National Reference Center for Viruses of Respiratory Infections, Institut Pasteur, Paris        | Marion Barbet et al     |
| EPI_ISL_954108  | Outre Mer                                            | National Reference Center for Viruses of Respiratory Infections, Institut Pasteur, Paris        | Marion Barbet et al     |
| EPI_ISL_954100  | Outre Mer                                            | National Reference Center for Viruses of Respiratory Infections, Institut Pasteur, Paris        | Marion Barbet et al     |
| EPI_ISL_1001419 | Outre mer                                            | National Reference Center for Viruses of Respiratory Infections, Institut Pasteur, Paris        | Marion Barbet et al     |
| EPI_ISL_1001401 | Outre mer                                            | National Reference Center for Viruses of Respiratory Infections, Institut Pasteur, Paris        | Marion Barbet et al     |
| EPI_ISL_1001384 | Outre mer                                            | National Reference Center for Viruses of Respiratory Infections, Institut Pasteur, Paris        | Marion Barbet et al     |
| EPI_ISL_1001385 | Outre mer                                            | National Reference Center for Viruses of Respiratory Infections, Institut Pasteur, Paris        | Marion Barbet et al     |
| EPI_ISL_1001425 | Outre mer                                            | National Reference Center for Viruses of Respiratory Infections, Institut Pasteur, Paris        | Marion Barbet et al     |
| EPI_ISL_431180  | Fujian Center for Disease Control and Prevention     | Fujian Center for Disease Control and Prevention                                                | Lin Qi et al            |
| EPI_ISL_431240  | Fujian Center for Disease Control and Prevention     | Fujian Center for Disease Control and Prevention                                                | Lin Qi et al            |
| EPI_ISL_539573  | Centre de Recherches Medicales de Lambarene (CERMEL) | Department of Emerging Infectious Diseases, Institute of Tropical Medicine, Nagasaki University | Haruka Abe et al        |
| EPI_ISL_539574  | Centre de Recherches Medicales de Lambarene (CERMEL) | Department of Emerging Infectious Diseases, Institute of Tropical Medicine, Nagasaki University | Haruka Abe et al        |
| EPI_ISL_539575  | Centre de Recherches Medicales de Lambarene (CERMEL) | Department of Emerging Infectious Diseases, Institute of Tropical Medicine, Nagasaki University | Haruka Abe et al        |
| EPI_ISL_539576  | Centre de Recherches Medicales de Lambarene (CERMEL) | Department of Emerging Infectious Diseases, Institute of Tropical Medicine, Nagasaki University | Haruka Abe et al        |
| EPI_ISL_471158  | MRCG at LSHTM Genomics lab                           | MRCG at LSHTM Genomics lab                                                                      | Sesay et al et al       |
| EPI_ISL_471159  | MRCG at LSHTM Genomics lab                           | MRCG at LSHTM Genomics lab                                                                      | Sesay et al et al       |
| EPI_ISL_471160  | MRCG at LSHTM Genomics lab                           | MRCG at LSHTM Genomics lab                                                                      | Sesay et al et al       |
| EPI_ISL_471161  | MRCG at LSHTM Genomics lab                           | MRCG at LSHTM Genomics lab                                                                      | Sesay et al et al       |
| EPI_ISL_471162  | MRCG at LSHTM Genomics lab                           | MRCG at LSHTM Genomics lab                                                                      | Sesay et al et al       |
| EPI_ISL_471163  | MRCG at LSHTM Genomics lab                           | MRCG at LSHTM Genomics lab                                                                      | Sesay et al et al       |
| EPI_ISL_471164  | MRCG at LSHTM Genomics lab                           | MRCG at LSHTM Genomics lab                                                                      | Sesay et al et al       |
| EPI_ISL_471165  | MRCG at LSHTM Genomics lab                           | MRCG at LSHTM Genomics lab                                                                      | Sesay et al et al       |
| EPI_ISL_471167  | MRCG at LSHTM Genomics lab                           | MRCG at LSHTM Genomics lab                                                                      | Sesay et al et al       |
| EPI_ISL_471169  | MRCG at LSHTM Genomics lab                           | MRCG at LSHTM Genomics lab                                                                      | Sesay et al et al       |
| EPI_ISL_471170  | MRCG at LSHTM Genomics lab                           | MRCG at LSHTM Genomics lab                                                                      | Sesay et al et al       |
| EPI_ISL_915192  | MRCG at LSHTM Genomics lab                           | MRCG at LSHTM Genomics lab                                                                      | Abdul Karim sesay et al |
| EPI_ISL_561005  | MRCG at LSHTM Genomics lab                           | MRCG at LSHTM Genomics lab                                                                      | Abdul Karim sesay et al |
| EPI_ISL_561008  | MRCG at LSHTM Genomics lab                           | MRCG at LSHTM Genomics lab                                                                      | Abdul Karim sesay et al |
| EPI_ISL_915421  | MRCG at LSHTM Genomics lab                           | MRCG at LSHTM Genomics lab                                                                      | Abdul Karim sesay et al |
| EPI_ISL_428855  | MRCG at LSHTM Geomics lab                            | MRCG at LSHTM Genomics lab                                                                      | Sesay et al et al       |
| EPI_ISL_428856  | MRCG at LSHTM Genomics Lab                           | MRCG at LSHTM Genomics lab                                                                      | Sesay et al et al       |
| EPI_ISL_428857  | MRCG at LSHTM Genomics lab                           | MRCG at LSHTM Genomics lab                                                                      | Sesay et al et al       |
| EPI_ISL_561015  | MRCG at LSHTM Genomics lab                           | MRCG at LSHTM Genomics lab                                                                      | Abdul Karim sesay et al |





|                |                                                                                                                                                                                         |                                                                                                                                                                                         |                         |
|----------------|-----------------------------------------------------------------------------------------------------------------------------------------------------------------------------------------|-----------------------------------------------------------------------------------------------------------------------------------------------------------------------------------------|-------------------------|
| EPI_ISL_416481 | R. G. Lugar Center for Public Health Research, National Center for Disease Control and Public Health (NCDC) of Georgia.                                                                 | R. G. Lugar Center for Public Health Research, National Center for Disease Control and Public Health (NCDC) of Georgia.                                                                 | Gvantsa Chanturia et al |
| EPI_ISL_477169 | Department for Virology, Molecular Biology and Genome Research, R. G. Lugar Center for Public Health Research, National Center for Disease Control and Public Health (NCDC) of Georgia. | Department for Virology, Molecular Biology and Genome Research, R. G. Lugar Center for Public Health Research, National Center for Disease Control and Public Health (NCDC) of Georgia. | Tata Imnadze et al      |
| EPI_ISL_481380 | Department for Virology, Molecular Biology and Genome Research, R. G. Lugar Center for Public Health Research, National Center for Disease Control and Public Health (NCDC) of Georgia. | Department for Virology, Molecular Biology and Genome Research, R. G. Lugar Center for Public Health Research, National Center for Disease Control and Public Health (NCDC) of Georgia. | Ana Papkiauri et al     |
| EPI_ISL_415644 | R. G. Lugar Center for Public Health Research, National Center for Disease Control and Public Health (NCDC) of Georgia.                                                                 | R. G. Lugar Center for Public Health Research, National Center for Disease Control and Public Health (NCDC) of Georgia.                                                                 | Nato Kotaria et al      |
| EPI_ISL_754180 | Department for Virology, Molecular Biology and Genome Research, R. G. Lugar Center for Public Health Research, National Center for Disease Control and Public Health (NCDC) of Georgia. | Department for Virology, Molecular Biology and Genome Research, R. G. Lugar Center for Public Health Research, National Center for Disease Control and Public Health (NCDC) of Georgia. | Salome Javashvili et al |
| EPI_ISL_754181 | Department for Virology, Molecular Biology and Genome Research, R. G. Lugar Center for Public Health Research, National Center for Disease Control and Public Health (NCDC) of Georgia. | Department for Virology, Molecular Biology and Genome Research, R. G. Lugar Center for Public Health Research, National Center for Disease Control and Public Health (NCDC) of Georgia. | Meri Pantsulaia et al   |
| EPI_ISL_416482 | R. G. Lugar Center for Public Health Research, National Center for Disease Control and Public Health (NCDC) of Georgia.                                                                 | R. G. Lugar Center for Public Health Research, National Center for Disease Control and Public Health (NCDC) of Georgia.                                                                 | Adam Kotorashvili et al |
| EPI_ISL_887255 | Protzer Lab                                                                                                                                                                             | Protzer Lab, Gagneur Lab, Robert Koch Institut                                                                                                                                          | Ulrike Protzer et al    |
| EPI_ISL_887223 | Protzer Lab                                                                                                                                                                             | Protzer Lab, Gagneur Lab, Robert Koch Institut                                                                                                                                          | Ulrike Protzer et al    |
| EPI_ISL_887328 | Protzer Lab                                                                                                                                                                             | Protzer Lab, Gagneur Lab, Robert Koch Institut                                                                                                                                          | Ulrike Protzer et al    |
| EPI_ISL_887244 | Protzer Lab                                                                                                                                                                             | Protzer Lab, Gagneur Lab, Robert Koch Institut                                                                                                                                          | Ulrike Protzer et al    |
| EPI_ISL_887208 | Protzer Lab                                                                                                                                                                             | Protzer Lab, Gagneur Lab, Robert Koch Institut                                                                                                                                          | Ulrike Protzer et al    |
| EPI_ISL_887412 | Protzer Lab                                                                                                                                                                             | Protzer Lab, Gagneur Lab, Robert Koch Institut                                                                                                                                          | Ulrike Protzer et al    |
| EPI_ISL_763052 | Unit 17: Influenza & Other Respiratory Viruses, German National Influenza Center                                                                                                        | Project group Epidemiology of Highly Pathogenic Microorganisms, Robert Koch-Institute                                                                                                   | Ariane D ux et al       |
| EPI_ISL_806539 | Charit  Universit tsmedizin Berlin, Institut f r Virologie/Labor Berlin                                                                                                                 | Charit  Universit tsmedizin Berlin, Institut f r Virologie                                                                                                                              | Victor M Corman et al   |
| EPI_ISL_753868 | Charit  Universit tsmedizin Berlin, Institut f r Virologie/Labor Berlin                                                                                                                 | Charit  Universit tsmedizin Berlin, Institut f r Virologie                                                                                                                              | Victor M Corman et al   |
| EPI_ISL_753871 | Charit  Universit tsmedizin Berlin, Institut f r Virologie/Labor Berlin                                                                                                                 | Charit  Universit tsmedizin Berlin, Institut f r Virologie                                                                                                                              | Victor M Corman et al   |
| EPI_ISL_753787 | Charit  Universit tsmedizin Berlin, Institut f r Virologie/Labor Berlin                                                                                                                 | Charit  Universit tsmedizin Berlin, Institut f r Virologie                                                                                                                              | Victor M Corman et al   |
| EPI_ISL_753888 | Charit  Universit tsmedizin Berlin, Institut f r Virologie/Labor Berlin                                                                                                                 | Charit  Universit tsmedizin Berlin, Institut f r Virologie                                                                                                                              | Victor M Corman et al   |
| EPI_ISL_753791 | Charit  Universit tsmedizin Berlin, Institut f r Virologie/Labor Berlin                                                                                                                 | Charit  Universit tsmedizin Berlin, Institut f r Virologie                                                                                                                              | Victor M Corman et al   |
| EPI_ISL_753822 | Charit  Universit tsmedizin Berlin, Institut f r Virologie/Labor Berlin                                                                                                                 | Charit  Universit tsmedizin Berlin, Institut f r Virologie                                                                                                                              | Victor M Corman et al   |
| EPI_ISL_753945 | Charit  Universit tsmedizin Berlin, Institut f r Virologie/Labor Berlin                                                                                                                 | Charit  Universit tsmedizin Berlin, Institut f r Virologie                                                                                                                              | Victor M Corman et al   |
| EPI_ISL_753746 | Charit  Universit tsmedizin Berlin, Institut f r Virologie/Labor Berlin                                                                                                                 | Charit  Universit tsmedizin Berlin, Institut f r Virologie                                                                                                                              | Victor M Corman et al   |
| EPI_ISL_753954 | Charit  Universit tsmedizin Berlin, Institut f r Virologie/Labor Berlin                                                                                                                 | Charit  Universit tsmedizin Berlin, Institut f r Virologie                                                                                                                              | Victor M Corman et al   |
| EPI_ISL_753807 | Charit  Universit tsmedizin Berlin, Institut f r Virologie/Labor Berlin                                                                                                                 | Charit  Universit tsmedizin Berlin, Institut f r Virologie                                                                                                                              | Victor M Corman et al   |
| EPI_ISL_753968 | Charit  Universit tsmedizin Berlin, Institut f r Virologie/Labor Berlin                                                                                                                 | Charit  Universit tsmedizin Berlin, Institut f r Virologie                                                                                                                              | Victor M Corman et al   |
| EPI_ISL_753747 | Charit  Universit tsmedizin Berlin, Institut f r Virologie/Labor Berlin                                                                                                                 | Charit  Universit tsmedizin Berlin, Institut f r Virologie                                                                                                                              | Victor M Corman et al   |
| EPI_ISL_753808 | Charit  Universit tsmedizin Berlin, Institut f r Virologie/Labor Berlin                                                                                                                 | Charit  Universit tsmedizin Berlin, Institut f r Virologie                                                                                                                              | Victor M Corman et al   |
| EPI_ISL_753726 | Charit  Universit tsmedizin Berlin, Institut f r Virologie/Labor Berlin                                                                                                                 | Charit  Universit tsmedizin Berlin, Institut f r Virologie                                                                                                                              | Victor M Corman et al   |
| EPI_ISL_753809 | Charit  Universit tsmedizin Berlin, Institut f r Virologie/Labor Berlin                                                                                                                 | Charit  Universit tsmedizin Berlin, Institut f r Virologie                                                                                                                              | Victor M Corman et al   |
| EPI_ISL_753708 | Charit  Universit tsmedizin Berlin, Institut f r Virologie/Labor Berlin                                                                                                                 | Charit  Universit tsmedizin Berlin, Institut f r Virologie                                                                                                                              | Victor M Corman et al   |
| EPI_ISL_753999 | Charit  Universit tsmedizin Berlin, Institut f r Virologie/Labor Berlin                                                                                                                 | Charit  Universit tsmedizin Berlin, Institut f r Virologie                                                                                                                              | Victor M Corman et al   |



|                |                                                                                              |                                                                                                                    |                        |
|----------------|----------------------------------------------------------------------------------------------|--------------------------------------------------------------------------------------------------------------------|------------------------|
| EPI_ISL_753711 | Charité Universitätsmedizin Berlin, Institut für Virologie/Labor Berlin                      | Charité Universitätsmedizin Berlin, Institut für Virologie                                                         | Victor M Corman et al  |
| EPI_ISL_912262 | Charité Universitätsmedizin Berlin, Institut für Virologie/Labor Berlin                      | Charité Universitätsmedizin Berlin, Institut für Virologie                                                         | Victor M Corman et al  |
| EPI_ISL_912263 | Charité Universitätsmedizin Berlin, Institut für Virologie/Labor Berlin                      | Charité Universitätsmedizin Berlin, Institut für Virologie                                                         | Victor M Corman et al  |
| EPI_ISL_729555 | Charité Universitätsmedizin Berlin, Institut für Virologie/Labor Berlin                      | Charité Universitätsmedizin Berlin, Institut für Virologie                                                         | Victor M Corman et al  |
| EPI_ISL_729556 | Charité Universitätsmedizin Berlin, Institut für Virologie/Labor Berlin                      | Charité Universitätsmedizin Berlin, Institut für Virologie                                                         | Victor M Corman et al  |
| EPI_ISL_729601 | Charité Universitätsmedizin Berlin, Institut für Virologie/Labor Berlin                      | Charité Universitätsmedizin Berlin, Institut für Virologie                                                         | Victor M Corman et al  |
| EPI_ISL_803894 | Robert Koch Institut                                                                         | Robert Koch Institut                                                                                               | Annika Brinkmann et al |
| EPI_ISL_815297 | Centogene                                                                                    | Centogene                                                                                                          | Peter Bauer et al      |
| EPI_ISL_412912 | State Health Office Baden-Württemberg                                                        | Charité Universitätsmedizin Berlin, Institute of Virology                                                          | Victor M Corman et al  |
| EPI_ISL_729475 | Charité Universitätsmedizin Berlin, Institut für Virologie/Labor Berlin                      | Charité Universitätsmedizin Berlin, Institut für Virologie                                                         | Victor M Corman et al  |
| EPI_ISL_729488 | Charité Universitätsmedizin Berlin, Institut für Virologie/Labor Berlin                      | Charité Universitätsmedizin Berlin, Institut für Virologie                                                         | Victor M Corman et al  |
| EPI_ISL_852762 | Institute of Virology, Medical Center, University of Freiburg, Freiburg, Germany             | Institute of Virology, Clinical Virus Genomics, Medical Center, University of Freiburg, Freiburg, Germany          | Jonas Fuchs et al      |
| EPI_ISL_852659 | Institute of Virology, Medical Center, University of Freiburg, Freiburg, Germany             | Institute of Virology, Clinical Virus Genomics, Medical Center, University of Freiburg, Freiburg, Germany          | Jonas Fuchs et al      |
| EPI_ISL_852760 | Institute of Virology, Medical Center, University of Freiburg, Freiburg, Germany             | Institute of Virology, Clinical Virus Genomics, Medical Center, University of Freiburg, Freiburg, Germany          | Jonas Fuchs et al      |
| EPI_ISL_852751 | Institute of Virology, Medical Center, University of Freiburg, Freiburg, Germany             | Institute of Virology, Clinical Virus Genomics, Medical Center, University of Freiburg, Freiburg, Germany          | Jonas Fuchs et al      |
| EPI_ISL_852807 | Institute of Virology, Medical Center, University of Freiburg, Freiburg, Germany             | Institute of Virology, Clinical Virus Genomics, Medical Center, University of Freiburg, Freiburg, Germany          | Jonas Fuchs et al      |
| EPI_ISL_852805 | Institute of Virology, Medical Center, University of Freiburg, Freiburg, Germany             | Institute of Virology, Clinical Virus Genomics, Medical Center, University of Freiburg, Freiburg, Germany          | Jonas Fuchs et al      |
| EPI_ISL_852749 | Institute of Virology, Medical Center, University of Freiburg, Freiburg, Germany             | Institute of Virology, Clinical Virus Genomics, Medical Center, University of Freiburg, Freiburg, Germany          | Jonas Fuchs et al      |
| EPI_ISL_852696 | Institute of Virology, Medical Center, University of Freiburg, Freiburg, Germany             | Institute of Virology, Clinical Virus Genomics, Medical Center, University of Freiburg, Freiburg, Germany          | Jonas Fuchs et al      |
| EPI_ISL_640226 | MVZ Laborärzte Singen                                                                        | MVZ Laborärzte Singen                                                                                              | Jonas Schmidt et al    |
| EPI_ISL_640261 | MVZ Laborärzte Singen                                                                        | MVZ Laborärzte Singen                                                                                              | Jonas Schmidt et al    |
| EPI_ISL_640267 | MVZ Laborärzte Singen                                                                        | MVZ Laborärzte Singen                                                                                              | Jonas Schmidt et al    |
| EPI_ISL_930878 | University Hospital Basel, Clinical Virology                                                 | University Hospital Basel, Clinical Bacteriology                                                                   | Tim Roloff et al       |
| EPI_ISL_485809 | Institut für Virologie und Epidemiologie der Viruskrankheiten, Universitätsklinikum Tübingen | NGS Competence Center Tübingen, Institut für Medizinische Mikrobiologie und Hygiene, Universitätsklinikum Tübingen | Angelov et al. et al   |
| EPI_ISL_485813 | Institut für Virologie und Epidemiologie der Viruskrankheiten, Universitätsklinikum Tübingen | NGS Competence Center Tübingen, Institut für Medizinische Mikrobiologie und Hygiene, Universitätsklinikum Tübingen | Angelov et al. et al   |
| EPI_ISL_508688 | Institut für Virologie und Epidemiologie der Viruskrankheiten, Universitätsklinikum Tübingen | NGS Competence Center Tübingen, Institut für Medizinische Mikrobiologie und Hygiene, Universitätsklinikum Tübingen | Angel Angelov et al    |
| EPI_ISL_508689 | Institut für Virologie und Epidemiologie der Viruskrankheiten, Universitätsklinikum Tübingen | NGS Competence Center Tübingen, Institut für Medizinische Mikrobiologie und Hygiene, Universitätsklinikum Tübingen | Angel Angelov et al    |
| EPI_ISL_508699 | Institut für Virologie und Epidemiologie der Viruskrankheiten, Universitätsklinikum Tübingen | NGS Competence Center Tübingen, Institut für Medizinische Mikrobiologie und Hygiene, Universitätsklinikum Tübingen | Angel Angelov et al    |
| EPI_ISL_815294 | Centogene                                                                                    | Centogene                                                                                                          | Peter Bauer et al      |
| EPI_ISL_815293 | Centogene                                                                                    | Centogene                                                                                                          | Peter Bauer et al      |
| EPI_ISL_450209 | Department of Virology                                                                       | Department of Virology                                                                                             | Boehmer et al          |
| EPI_ISL_450199 | Department of Virology                                                                       | Department of Virology                                                                                             | Boehmer et al          |

|                |                                                                                                              |                                                                                                   |                         |
|----------------|--------------------------------------------------------------------------------------------------------------|---------------------------------------------------------------------------------------------------|-------------------------|
| EPI_ISL_450200 | Department of Virology                                                                                       | Department of Virology                                                                            | Boehmer et al           |
| EPI_ISL_450203 | Department of Virology                                                                                       | Department of Virology                                                                            | Boehmer et al           |
| EPI_ISL_450204 | Department of Virology                                                                                       | Department of Virology                                                                            | Boehmer et al           |
| EPI_ISL_450207 | Department of Virology                                                                                       | Department of Virology                                                                            | Boehmer et al           |
| EPI_ISL_450208 | Department of Virology                                                                                       | Department of Virology                                                                            | Boehmer et al           |
| EPI_ISL_450198 | Department of Virology                                                                                       | Department of Virology                                                                            | Boehmer et al           |
| EPI_ISL_406862 | Charité Universitätsmedizin Berlin, Institute of Virology; Institut für Mikrobiologie der Bundeswehr, Munich | Charité Universitätsmedizin Berlin, Institute of Virology                                         | Victor M Corman et al   |
| EPI_ISL_754025 | Charité Universitätsmedizin Berlin, Institut für Virologie/Labor Berlin                                      | Charité Universitätsmedizin Berlin, Institut für Virologie                                        | Victor M Corman et al   |
| EPI_ISL_802994 | Charité Universitätsmedizin Berlin, Institut für Virologie, Charitéplatz 1, 10117 Berlin, Germany            | Charité Universitätsmedizin Berlin, Institut für Virologie, Charitéplatz 1, 10117 Berlin, Germany | Victor M Corman et al   |
| EPI_ISL_802995 | Charité Universitätsmedizin Berlin, Institut für Virologie, Charitéplatz 1, 10117 Berlin, Germany            | Charité Universitätsmedizin Berlin, Institut für Virologie, Charitéplatz 1, 10117 Berlin, Germany | Victor M Corman et al   |
| EPI_ISL_912254 | Charité Universitätsmedizin Berlin, Institut für Virologie/Labor Berlin                                      | Charité Universitätsmedizin Berlin, Institut für Virologie                                        | Victor M Corman et al   |
| EPI_ISL_732541 | Bundeswehr Institute of Microbiology                                                                         | Bundeswehr Institute of Microbiology                                                              | Markus Antwerpen et al  |
| EPI_ISL_490208 | München Klinik Schwabing                                                                                     | MGZ Medical Genetics Center                                                                       | Dieter A. Wolf et al    |
| EPI_ISL_437291 | Max von Pettenkofer Institute, Virology, National Reference Center for Retroviruses, LMU München             | Laboratory for Functional Genome Analysis, Dept. Genomics, Gene Center of the LMU Munich          | Max Muenchhoff et al    |
| EPI_ISL_466906 | Max von Pettenkofer Institute, Virology, National Reference Center for Retroviruses, LMU München             | Laboratory for Functional Genome Analysis, Dept. Genomics, Gene Center of the LMU Munich          | Max Muenchhoff et al    |
| EPI_ISL_466914 | Max von Pettenkofer Institute, Virology, National Reference Center for Retroviruses, LMU München             | Laboratory for Functional Genome Analysis, Dept. Genomics, Gene Center of the LMU Munich          | Max Muenchhoff et al    |
| EPI_ISL_852565 | Max von Pettenkofer Institute, Virology, National Reference Center for Retroviruses, LMU München             | Laboratory for Functional Genome Analysis, Dept. Genomics, Gene Center of the LMU Munich          | Max Muenchhoff et al    |
| EPI_ISL_909747 | Charité Universitätsmedizin Berlin, Institut für Virologie/Labor Berlin                                      | Charité Universitätsmedizin Berlin, Institut für Virologie                                        | Victor M Corman et al   |
| EPI_ISL_452219 | Goethe University Hospital Frankfurt                                                                         | Institute for Medical Virology, Goethe University Hospital Frankfurt                              | Tuna Toptan et al       |
| EPI_ISL_815310 | Centogene                                                                                                    | Centogene                                                                                         | Peter Bauer et al       |
| EPI_ISL_959921 | University Medical Center Hamburg Eppendorf                                                                  | Heinrich Pette Institute, Leibniz Institute for Experimental Virology                             | Alexis Robitaille et al |
| EPI_ISL_960023 | University Medical Center Hamburg Eppendorf                                                                  | Heinrich Pette Institute, Leibniz Institute for Experimental Virology                             | Alexis Robitaille et al |
| EPI_ISL_959931 | University Medical Center Hamburg Eppendorf                                                                  | Heinrich Pette Institute, Leibniz Institute for Experimental Virology                             | Alexis Robitaille et al |
| EPI_ISL_960047 | University Medical Center Hamburg Eppendorf                                                                  | Heinrich Pette Institute, Leibniz Institute for Experimental Virology                             | Alexis Robitaille et al |
| EPI_ISL_960051 | University Medical Center Hamburg Eppendorf                                                                  | Heinrich Pette Institute, Leibniz Institute for Experimental Virology                             | Alexis Robitaille et al |
| EPI_ISL_960029 | University Medical Center Hamburg Eppendorf                                                                  | Heinrich Pette Institute, Leibniz Institute for Experimental Virology                             | Alexis Robitaille et al |
| EPI_ISL_960032 | University Medical Center Hamburg Eppendorf                                                                  | Heinrich Pette Institute, Leibniz Institute for Experimental Virology                             | Alexis Robitaille et al |
| EPI_ISL_960008 | University Medical Center Hamburg Eppendorf                                                                  | Heinrich Pette Institute, Leibniz Institute for Experimental Virology                             | Alexis Robitaille et al |
| EPI_ISL_960007 | University Medical Center Hamburg Eppendorf                                                                  | Heinrich Pette Institute, Leibniz Institute for Experimental Virology                             | Alexis Robitaille et al |
| EPI_ISL_960010 | University Medical Center Hamburg Eppendorf                                                                  | Heinrich Pette Institute, Leibniz Institute for Experimental Virology                             | Alexis Robitaille et al |
| EPI_ISL_960013 | University Medical Center Hamburg Eppendorf                                                                  | Heinrich Pette Institute, Leibniz Institute for Experimental Virology                             | Alexis Robitaille et al |
| EPI_ISL_960025 | University Medical Center Hamburg Eppendorf                                                                  | Heinrich Pette Institute, Leibniz Institute for Experimental Virology                             | Alexis Robitaille et al |
| EPI_ISL_960016 | University Medical Center Hamburg Eppendorf                                                                  | Heinrich Pette Institute, Leibniz Institute for Experimental Virology                             | Alexis Robitaille et al |
| EPI_ISL_776161 | University Medical Center Hamburg Eppendorf                                                                  | Heinrich Pette Institute, Leibniz Institute for Experimental Virology                             | Alexis Robitaille et al |
| EPI_ISL_776170 | University Medical Center Hamburg Eppendorf                                                                  | Heinrich Pette Institute, Leibniz Institute for Experimental Virology                             | Alexis Robitaille et al |
| EPI_ISL_776539 | University Medical Center Hamburg Eppendorf                                                                  | Heinrich Pette Institute, Leibniz Institute for Experimental Virology                             | Alexis Robitaille et al |

|                |                                                                                                                 |                                                                                                                 |                                      |
|----------------|-----------------------------------------------------------------------------------------------------------------|-----------------------------------------------------------------------------------------------------------------|--------------------------------------|
| EPI_ISL_459964 | Centogene AG                                                                                                    | Centogene AG                                                                                                    | Prof. Dr. Peter Bauer et al          |
| EPI_ISL_806536 | Charité Universitätsmedizin Berlin, Institut für Virologie/Labor Berlin                                         | Charité Universitätsmedizin Berlin, Institut für Virologie                                                      | Victor M Corman et al                |
| EPI_ISL_883176 | UK Tübingen, Medical Microbiology                                                                               | Hannover Medical School, Institute of Virology                                                                  | Lars Steinbrück et al                |
| EPI_ISL_815303 | Centogene                                                                                                       | Centogene                                                                                                       | Peter Bauer et al                    |
| EPI_ISL_729478 | Charité Universitätsmedizin Berlin, Institut für Virologie/Labor Berlin                                         | Charité Universitätsmedizin Berlin, Institut für Virologie                                                      | Victor M Corman et al                |
| EPI_ISL_860788 | Charité Universitätsmedizin Berlin, Institute of Virology, Charitéplatz 1, 10117 Berlin, Germany                | Charité Universitätsmedizin Berlin, Institute of Virology, Charitéplatz 1, 10117 Berlin, Germany                | Victor M Corman et al                |
| EPI_ISL_414497 | Center of Medical Microbiology, Virology, and Hospital Hygiene, University of Duesseldorf                       | Center of Medical Microbiology, Virology, and Hospital Hygiene, University of Duesseldorf                       | Ortwin Adams et al                   |
| EPI_ISL_414498 | Center of Medical Microbiology, Virology, and Hospital Hygiene, University of Duesseldorf                       | Center of Medical Microbiology, Virology, and Hospital Hygiene, University of Duesseldorf                       | Ortwin Adams et al                   |
| EPI_ISL_414504 | Center of Medical Microbiology, Virology, and Hospital Hygiene, University of Duesseldorf                       | Center of Medical Microbiology, Virology, and Hospital Hygiene, University of Duesseldorf                       | Ortwin Adams et al                   |
| EPI_ISL_414505 | Center of Medical Microbiology, Virology, and Hospital Hygiene, University of Duesseldorf                       | Center of Medical Microbiology, Virology, and Hospital Hygiene, University of Duesseldorf                       | Ortwin Adams et al                   |
| EPI_ISL_602475 | Institute for Virology, University Hospital Essen                                                               | Center of Medical Microbiology, Virology, and Hospital Hygiene, University of Duesseldorf                       | Olympia E. Anastasiou et al          |
| EPI_ISL_631387 | ZOTZ KLIMAS MVZ Düsseldorf-Centrum GbR ÜBAG für Labormedizin, Genetik, Zytologie, Pathologie                    | Center of Medical Microbiology, Virology, and Hospital Hygiene, University of Duesseldorf                       | Maximilian Damagnez et al            |
| EPI_ISL_770762 | ZOTZ KLIMAS MVZ Düsseldorf-Centrum GbR ÜBAG für Labormedizin, Genetik, Zytologie, Pathologie                    | Center of Medical Microbiology, Virology, and Hospital Hygiene, University of Duesseldorf                       | Maximilian Damagnez et al            |
| EPI_ISL_666637 | ZOTZ KLIMAS MVZ Düsseldorf-Centrum GbR ÜBAG für Labormedizin, Genetik, Zytologie, Pathologie                    | Center of Medical Microbiology, Virology, and Hospital Hygiene, University of Duesseldorf                       | Maximilian Damagnez et al            |
| EPI_ISL_718046 | ZOTZ KLIMAS MVZ Düsseldorf-Centrum GbR ÜBAG für Labormedizin, Genetik, Zytologie, Pathologie                    | Center of Medical Microbiology, Virology, and Hospital Hygiene, University of Duesseldorf                       | Maximilian Damagnez et al            |
| EPI_ISL_718069 | ZOTZ KLIMAS MVZ Düsseldorf-Centrum GbR ÜBAG für Labormedizin, Genetik, Zytologie, Pathologie                    | Center of Medical Microbiology, Virology, and Hospital Hygiene, University of Duesseldorf                       | Maximilian Damagnez et al            |
| EPI_ISL_718103 | ZOTZ KLIMAS MVZ Düsseldorf-Centrum GbR ÜBAG für Labormedizin, Genetik, Zytologie, Pathologie                    | Center of Medical Microbiology, Virology, and Hospital Hygiene, University of Duesseldorf                       | Maximilian Damagnez et al            |
| EPI_ISL_770694 | ZOTZ KLIMAS MVZ Düsseldorf-Centrum GbR ÜBAG für Labormedizin, Genetik, Zytologie, Pathologie                    | Center of Medical Microbiology, Virology, and Hospital Hygiene, University of Duesseldorf                       | Maximilian Damagnez et al            |
| EPI_ISL_770695 | ZOTZ KLIMAS MVZ Düsseldorf-Centrum GbR ÜBAG für Labormedizin, Genetik, Zytologie, Pathologie                    | Center of Medical Microbiology, Virology, and Hospital Hygiene, University of Duesseldorf                       | Maximilian Damagnez et al            |
| EPI_ISL_770711 | ZOTZ KLIMAS MVZ Düsseldorf-Centrum GbR ÜBAG für Labormedizin, Genetik, Zytologie, Pathologie                    | Center of Medical Microbiology, Virology, and Hospital Hygiene, University of Duesseldorf                       | Maximilian Damagnez et al            |
| EPI_ISL_572333 | Institute for Virology, University Hospital Duesseldorf, Medical Faculty, Heinrich-Heine-University Duesseldorf | Institute for Virology, University Hospital Duesseldorf, Medical Faculty, Heinrich-Heine-University Duesseldorf | Maximilian Damagnez et al            |
| EPI_ISL_572397 | Institute for Virology, University Hospital Duesseldorf, Medical Faculty, Heinrich-Heine-University Duesseldorf | Institute for Virology, University Hospital Duesseldorf, Medical Faculty, Heinrich-Heine-University Duesseldorf | Maximilian Damagnez et al            |
| EPI_ISL_573152 | Institute for Virology, University Hospital Duesseldorf, Medical Faculty, Heinrich-Heine-University Duesseldorf | Institute for Virology, University Hospital Duesseldorf, Medical Faculty, Heinrich-Heine-University Duesseldorf | Maximilian Damagnez et al            |
| EPI_ISL_574259 | Institute for Virology, University Hospital Duesseldorf, Medical Faculty, Heinrich-Heine-University Duesseldorf | Institute for Virology, University Hospital Duesseldorf, Medical Faculty, Heinrich-Heine-University Duesseldorf | Maximilian Damagnez et al            |
| EPI_ISL_864557 | Knappschafts Krankenhaus Bochum                                                                                 | Bundeswehr Institute of Microbiology                                                                            | Markus Antwerpen et al               |
| EPI_ISL_827042 | Institute of Virology, University of Cologne                                                                    | Institute of Virology, University of Cologne                                                                    | Saleta Sierra et al                  |
| EPI_ISL_831382 | Labor Krone                                                                                                     | Robert Koch Institute, Influenza and respiratory viruses FG17 & Bioinformatics MF1, Berlin, Germany             | Dr. Münstermann. Prof. Tiemann et al |
| EPI_ISL_831403 | MVZ Düsseldorf Zentrum GbR                                                                                      | Robert Koch Institute, Influenza and respiratory viruses FG17 & Bioinformatics MF1, Berlin, Germany             | Dr. Finzer et al                     |

|                |                                                                                                                                           |                                                                                                     |                              |
|----------------|-------------------------------------------------------------------------------------------------------------------------------------------|-----------------------------------------------------------------------------------------------------|------------------------------|
| EPI_ISL_763025 | Unit 17: Influenza & Other Respiratory Viruses, German National Influenza Center                                                          | Project group Epidemiology of Highly Pathogenic Microorganisms, Robert Koch-Institute               | Ariane Dux et al             |
| EPI_ISL_815299 | Centogene                                                                                                                                 | Centogene                                                                                           | Peter Bauer et al            |
| EPI_ISL_815301 | Centogene                                                                                                                                 | Centogene                                                                                           | Peter Bauer et al            |
| EPI_ISL_815300 | Centogene                                                                                                                                 | Centogene                                                                                           | Peter Bauer et al            |
| EPI_ISL_909751 | Charité Universitätsmedizin Berlin, Institut für Virologie/Labor Berlin                                                                   | Charité Universitätsmedizin Berlin, Institut für Virologie                                          | Victor M Corman et al        |
| EPI_ISL_729434 | A. Krumbholz, Labor Dr. Krause und Kollegen MVZ GmbH, Kiel                                                                                | Charité Universitätsmedizin Berlin, Institut für Virologie                                          | Victor M Corman et al        |
| EPI_ISL_729677 | A. Krumbholz, Labor Dr. Krause und Kollegen MVZ GmbH, Kiel                                                                                | Charité Universitätsmedizin Berlin, Institut für Virologie                                          | Victor M Corman et al        |
| EPI_ISL_824785 | A. Krumbholz, Labor Dr. Krause und Kollegen MVZ GmbH, Kiel                                                                                | Charité Universitätsmedizin Berlin, Institut für Virologie                                          | Victor M Corman et al        |
| EPI_ISL_849819 | A. Krumbholz, Labor Dr. Krause und Kollegen MVZ GmbH, Kiel                                                                                | Charité Universitätsmedizin Berlin, Institut für Virologie                                          | Victor M Corman et al        |
| EPI_ISL_849851 | A. Krumbholz, Labor Dr. Krause und Kollegen MVZ GmbH, Kiel                                                                                | Charité Universitätsmedizin Berlin, Institut für Virologie                                          | Victor M Corman et al        |
| EPI_ISL_729520 | A. Krumbholz, Labor Dr. Krause und Kollegen MVZ GmbH, Kiel                                                                                | Charité Universitätsmedizin Berlin, Institut für Virologie                                          | Victor M Corman et al        |
| EPI_ISL_729568 | A. Krumbholz, Labor Dr. Krause und Kollegen MVZ GmbH, Kiel                                                                                | Charité Universitätsmedizin Berlin, Institut für Virologie                                          | Victor M Corman et al        |
| EPI_ISL_729569 | A. Krumbholz, Labor Dr. Krause und Kollegen MVZ GmbH, Kiel                                                                                | Charité Universitätsmedizin Berlin, Institut für Virologie                                          | Victor M Corman et al        |
| EPI_ISL_729570 | A. Krumbholz, Labor Dr. Krause und Kollegen MVZ GmbH, Kiel                                                                                | Charité Universitätsmedizin Berlin, Institut für Virologie                                          | Victor M Corman et al        |
| EPI_ISL_729427 | A. Krumbholz, Labor Dr. Krause und Kollegen MVZ GmbH, Kiel                                                                                | Charité Universitätsmedizin Berlin, Institut für Virologie                                          | Victor M Corman et al        |
| EPI_ISL_729429 | A. Krumbholz, Labor Dr. Krause und Kollegen MVZ GmbH, Kiel                                                                                | Charité Universitätsmedizin Berlin, Institut für Virologie                                          | Victor M Corman et al        |
| EPI_ISL_729349 | A. Krumbholz, Labor Dr. Krause und Kollegen MVZ GmbH, Kiel                                                                                | Charité Universitätsmedizin Berlin, Institut für Virologie                                          | Victor M Corman et al        |
| EPI_ISL_959907 | University Medical Center Hamburg Eppendorf                                                                                               | Heinrich Pette Institute, Leibniz Institute for Experimental Virology                               | Alexis Robitaille et al      |
| EPI_ISL_831426 | Labor Dr. Krause & Kollegen MVZ GmbH<br>Institute of Medical Microbiology and Virology, University Hospital Carl Gustav Carus, TU Dresden | Robert Koch Institute, Influenza and respiratory viruses FG17 & Bioinformatics MF1, Berlin, Germany | Dr. Lorentz et al            |
| EPI_ISL_887111 | Institute of Medical Microbiology and Hospital Hygiene                                                                                    | DRESDEN-concept Genome Center, CMCB, TU Dresden                                                     | Beil J. et al                |
| EPI_ISL_887126 | Institute of Medical Microbiology and Hospital Hygiene                                                                                    | Institute of Medical Microbiology and Hospital Hygiene                                              | Prof. Dr. Achim Kaasch et al |
| EPI_ISL_960868 | Institute of Medical Microbiology and Hospital Hygiene                                                                                    | Institute of Medical Microbiology and Hospital Hygiene                                              | Prof. Dr. Achim Kaasch et al |
| EPI_ISL_960846 | Landesamt für Verbraucherschutz Sachsen Anhalt, Magdeburg                                                                                 | Institute of Medical Microbiology and Hospital Hygiene                                              | Prof. Dr. Achim Kaasch et al |
| EPI_ISL_960843 | Landesamt für Verbraucherschutz Sachsen Anhalt, Magdeburg                                                                                 | Institute of Medical Microbiology and Hospital Hygiene                                              | Prof. Dr. Achim Kaasch et al |
| EPI_ISL_960894 | Landesamt für Verbraucherschutz Sachsen Anhalt, Magdeburg                                                                                 | Institute of Medical Microbiology and Hospital Hygiene                                              | Prof. Dr. Achim Kaasch et al |
| EPI_ISL_960891 | Landesamt für Verbraucherschutz Sachsen Anhalt, Magdeburg                                                                                 | Institute of Medical Microbiology and Hospital Hygiene                                              | Prof. Dr. Achim Kaasch et al |
| EPI_ISL_960892 | Landesamt für Verbraucherschutz Sachsen Anhalt, Magdeburg                                                                                 | Institute of Medical Microbiology and Hospital Hygiene                                              | Prof. Dr. Achim Kaasch et al |
| EPI_ISL_960895 | Landesamt für Verbraucherschutz Sachsen Anhalt, Magdeburg                                                                                 | Institute of Medical Microbiology and Hospital Hygiene                                              | Prof. Dr. Achim Kaasch et al |
| EPI_ISL_960897 | Landesamt für Verbraucherschutz Sachsen Anhalt, Magdeburg                                                                                 | Institute of Medical Microbiology and Hospital Hygiene                                              | Prof. Dr. Achim Kaasch et al |
| EPI_ISL_960896 | Landesamt für Verbraucherschutz Sachsen Anhalt, Magdeburg                                                                                 | Institute of Medical Microbiology and Hospital Hygiene                                              | Prof. Dr. Achim Kaasch et al |
| EPI_ISL_960898 | Landesamt für Verbraucherschutz Sachsen Anhalt, Magdeburg                                                                                 | Institute of Medical Microbiology and Hospital Hygiene                                              | Prof. Dr. Achim Kaasch et al |
| EPI_ISL_960835 | Landesamt für Verbraucherschutz Sachsen Anhalt, Magdeburg                                                                                 | Institute of Medical Microbiology and Hospital Hygiene                                              | Prof. Dr. Achim Kaasch et al |
| EPI_ISL_960885 | Landesamt für Verbraucherschutz Sachsen Anhalt, Magdeburg                                                                                 | Institute of Medical Microbiology and Hospital Hygiene                                              | Prof. Dr. Achim Kaasch et al |
| EPI_ISL_422387 | NMIMR, Department of Virology                                                                                                             | WACCBIP, University of Ghana                                                                        | Joyce M. Ngoi et al          |
| EPI_ISL_422405 | NMIMR, Department of Virology                                                                                                             | WACCBIP, University of Ghana                                                                        | Joyce M. Ngoi et al          |
| EPI_ISL_422390 | NMIMR, Department of Virology                                                                                                             | WACCBIP, University of Ghana                                                                        | Joyce M. Ngoi et al          |
| EPI_ISL_422394 | NMIMR, Department of Virology                                                                                                             | WACCBIP, University of Ghana                                                                        | Joyce M. Ngoi et al          |
| EPI_ISL_515082 | Department of Biochemistry, Cell and Molecular Biology                                                                                    | WACCBIP, University of Ghana                                                                        | Ngoi et al                   |

|                |                                                                                                                                                     |                                                                                                                                                     |                           |
|----------------|-----------------------------------------------------------------------------------------------------------------------------------------------------|-----------------------------------------------------------------------------------------------------------------------------------------------------|---------------------------|
| EPI_ISL_515083 | Department of Biochemistry, Cell and Molecular Biology                                                                                              | WACCBIP, University of Ghana                                                                                                                        | Ngoi et al                |
| EPI_ISL_515084 | Department of Biochemistry, Cell and Molecular Biology                                                                                              | WACCBIP, University of Ghana                                                                                                                        | Ngoi et al                |
| EPI_ISL_422397 | NMIMR, Department of Virology                                                                                                                       | WACCBIP, University of Ghana                                                                                                                        | Joyce M. Ngoi et al       |
| EPI_ISL_515085 | Department of Biochemistry, Cell and Molecular Biology                                                                                              | WACCBIP, University of Ghana                                                                                                                        | Ngoi et al                |
| EPI_ISL_422402 | NMIMR, Department of Virology                                                                                                                       | WACCBIP, University of Ghana                                                                                                                        | Joyce M. Ngoi et al       |
| EPI_ISL_422403 | NMIMR, Department of Virology                                                                                                                       | WACCBIP, University of Ghana                                                                                                                        | Joyce M. Ngoi et al       |
| EPI_ISL_515091 | Department of Biochemistry, Cell and Molecular Biology                                                                                              | WACCBIP, University of Ghana                                                                                                                        | Ngoi et al                |
| EPI_ISL_515092 | Department of Biochemistry, Cell and Molecular Biology                                                                                              | WACCBIP, University of Ghana                                                                                                                        | Ngoi et al                |
| EPI_ISL_515097 | Department of Biochemistry, Cell and Molecular Biology                                                                                              | WACCBIP, University of Ghana                                                                                                                        | Ngoi et al                |
| EPI_ISL_515099 | Department of Biochemistry, Cell and Molecular Biology                                                                                              | WACCBIP, University of Ghana                                                                                                                        | Ngoi et al                |
| EPI_ISL_515100 | Department of Biochemistry, Cell and Molecular Biology                                                                                              | WACCBIP, University of Ghana                                                                                                                        | Ngoi et al                |
| EPI_ISL_515102 | Department of Biochemistry, Cell and Molecular Biology                                                                                              | WACCBIP, University of Ghana                                                                                                                        | Ngoi et al                |
| EPI_ISL_515103 | Department of Biochemistry, Cell and Molecular Biology                                                                                              | WACCBIP, University of Ghana                                                                                                                        | Ngoi et al                |
| EPI_ISL_515107 | Department of Biochemistry, Cell and Molecular Biology                                                                                              | WACCBIP, University of Ghana                                                                                                                        | Ngoi et al                |
| EPI_ISL_515108 | Department of Biochemistry, Cell and Molecular Biology                                                                                              | WACCBIP, University of Ghana                                                                                                                        | Ngoi et al                |
| EPI_ISL_515109 | Department of Biochemistry, Cell and Molecular Biology                                                                                              | WACCBIP, University of Ghana                                                                                                                        | Ngoi et al                |
| EPI_ISL_515111 | Department of Biochemistry, Cell and Molecular Biology                                                                                              | WACCBIP, University of Ghana                                                                                                                        | Ngoi et al                |
| EPI_ISL_515181 | Kumasi Centre for Collaborative Research in Tropical Medicine, Kumasi.                                                                              | Institute of Virology, Charité – Universitätsmedizin Berlin                                                                                         | Augustina Sylverken et al |
| EPI_ISL_515182 | Kumasi Centre for Collaborative Research in Tropical Medicine, Kumasi.                                                                              | Institute of Virology, Charité – Universitätsmedizin Berlin                                                                                         | Augustina Sylverken et al |
| EPI_ISL_515183 | Kumasi Centre for Collaborative Research in Tropical Medicine, Kumasi.                                                                              | Institute of Virology, Charité – Universitätsmedizin Berlin                                                                                         | Augustina Sylverken et al |
| EPI_ISL_515248 | Kumasi Centre for Collaborative Research in Tropical Medicine, Kumasi.                                                                              | Institute of Virology, Charité – Universitätsmedizin Berlin                                                                                         | Augustina Sylverken et al |
| EPI_ISL_648124 | UHAS COVID-19 Lab                                                                                                                                   | UHAS COVID-19 Lab                                                                                                                                   | Kwabena O. Duedu et al    |
| EPI_ISL_648125 | UHAS COVID-19 Lab                                                                                                                                   | UHAS COVID-19 Lab                                                                                                                                   | Kwabena O. Duedu et al    |
| EPI_ISL_628761 | UHAS COVID-19 Lab                                                                                                                                   | UHAS COVID-19 Lab                                                                                                                                   | Kwabena O. Duedu et al    |
| EPI_ISL_861460 | UHAS COVID-19 Lab                                                                                                                                   | UHAS COVID-19 Lab                                                                                                                                   | Kwabena O. Duedu et al    |
| EPI_ISL_861459 | UHAS COVID-19 Lab                                                                                                                                   | UHAS COVID-19 Lab                                                                                                                                   | Kwabena O. Duedu et al    |
| EPI_ISL_884829 | Department of Biochemistry, Cell and Molecular Biology, West African Centre for Cell Biology of Infectious Pathogens (WACCBIP), University of Ghana | Department of Biochemistry, Cell and Molecular Biology, West African Centre for Cell Biology of Infectious Pathogens (WACCBIP), University of Ghana | Ngoi et al                |
| EPI_ISL_884830 | Department of Biochemistry, Cell and Molecular Biology, West African Centre for Cell Biology of Infectious Pathogens (WACCBIP), University of Ghana | Department of Biochemistry, Cell and Molecular Biology, West African Centre for Cell Biology of Infectious Pathogens (WACCBIP), University of Ghana | Ngoi et al                |
| EPI_ISL_884833 | Department of Biochemistry, Cell and Molecular Biology, West African Centre for Cell Biology of Infectious Pathogens (WACCBIP), University of Ghana | Department of Biochemistry, Cell and Molecular Biology, West African Centre for Cell Biology of Infectious Pathogens (WACCBIP), University of Ghana | Ngoi et al                |
| EPI_ISL_944653 | Department of Biochemistry, Cell and Molecular Biology, West African Centre for Cell Biology of Infectious Pathogens (WACCBIP), University of Ghana | Department of Biochemistry, Cell and Molecular Biology, West African Centre for Cell Biology of Infectious Pathogens (WACCBIP), University of Ghana | Morang'a et al            |
| EPI_ISL_884836 | Department of Biochemistry, Cell and Molecular Biology, West African Centre for Cell Biology of Infectious Pathogens (WACCBIP), University of Ghana | Department of Biochemistry, Cell and Molecular Biology, West African Centre for Cell Biology of Infectious Pathogens (WACCBIP), University of Ghana | Ngoi et al                |



|                |                                                                                                                                      |                                                                                                                                                              |                              |
|----------------|--------------------------------------------------------------------------------------------------------------------------------------|--------------------------------------------------------------------------------------------------------------------------------------------------------------|------------------------------|
| EPI_ISL_434471 | Laboratory of Microbiology, Medical School, National and Kapodistrian University of Athens                                           | Laboratory of Biology, Department of Medicine, Democritus University of Thrace                                                                               | Kassela K. et al             |
| EPI_ISL_501248 | Hellenic Pasteur Institute, National Influenza Reference laboratory of Southern Greece & Unit of Bioinformatics and Applied Genomics | Hellenic Pasteur Institute, National Influenza Reference laboratory of Southern Greece & Unit of Bioinformatics and Applied Genomics                         | Vasiliki Pogka et al         |
| EPI_ISL_447635 | unknown                                                                                                                              | Department of Medicine, Hellenic Pasteur Institute, National Influenza Reference laboratory of Southern Greece & Unit of Bioinformatics and Applied Genomics | Kassela et al                |
| EPI_ISL_501249 | Hellenic Pasteur Institute, National Influenza Reference laboratory of Southern Greece & Unit of Bioinformatics and Applied Genomics | Department of Medicine, Hellenic Pasteur Institute, National Influenza Reference laboratory of Southern Greece & Unit of Bioinformatics and Applied Genomics | Vasiliki Pogka et al         |
| EPI_ISL_418265 | Laboratory of Microbiology, Department of Medicine, National and Kapodistrian University of Athens, Greece                           | Laboratory of Biology, Department of Medicine, Democritus University of Thrace                                                                               | Maria Bampali et al          |
| EPI_ISL_501230 | Hellenic Pasteur Institute, Public Health Laboratories                                                                               | Hellenic Pasteur Institute, National Influenza Reference laboratory of Southern Greece & Unit of Bioinformatics and Applied Genomics                         | Vasiliki Pogka et al         |
| EPI_ISL_501231 | Hellenic Pasteur Institute, National Influenza Reference laboratory of Southern Greece & Unit of Bioinformatics and Applied Genomics | Hellenic Pasteur Institute, National Influenza Reference laboratory of Southern Greece & Unit of Bioinformatics and Applied Genomics                         | Vasiliki Pogka et al         |
| EPI_ISL_501233 | Hellenic Pasteur Institute, National Influenza Reference laboratory of Southern Greece & Unit of Bioinformatics and Applied Genomics | Hellenic Pasteur Institute, National Influenza Reference laboratory of Southern Greece & Unit of Bioinformatics and Applied Genomics                         | Vasiliki Pogka et al         |
| EPI_ISL_501250 | Hellenic Pasteur Institute, National Influenza Reference laboratory of Southern Greece & Unit of Bioinformatics and Applied Genomics | Hellenic Pasteur Institute, National Influenza Reference laboratory of Southern Greece & Unit of Bioinformatics and Applied Genomics                         | Vasiliki Pogka et al         |
| EPI_ISL_501235 | Hellenic Pasteur Institute, National Influenza Reference laboratory of Southern Greece & Unit of Bioinformatics and Applied Genomics | Hellenic Pasteur Institute, National Influenza Reference laboratory of Southern Greece & Unit of Bioinformatics and Applied Genomics                         | Vasiliki Pogka et al         |
| EPI_ISL_501236 | Hellenic Pasteur Institute, National Influenza Reference laboratory of Southern Greece & Unit of Bioinformatics and Applied Genomics | Hellenic Pasteur Institute, National Influenza Reference laboratory of Southern Greece & Unit of Bioinformatics and Applied Genomics                         | Vasiliki Pogka et al         |
| EPI_ISL_437898 | Laboratory of Microbiology, Medical School, National and Kapodistrian University of Athens                                           | Laboratory of Biology, Department of Medicine, Democritus University of Thrace                                                                               | Kassela K. et al             |
| EPI_ISL_437910 | Laboratory of Microbiology, Medical School, National and Kapodistrian University of Athens                                           | Laboratory of Biology, Department of Medicine, Democritus University of Thrace                                                                               | Kassela K. et al             |
| EPI_ISL_434466 | Laboratory of Microbiology, Medical School, National and Kapodistrian University of Athens                                           | Laboratory of Biology, Department of Medicine, Democritus University of Thrace                                                                               | Kassela K. et al             |
| EPI_ISL_437911 | Laboratory of Microbiology, Medical School, National and Kapodistrian University of Athens                                           | Laboratory of Biology, Department of Medicine, Democritus University of Thrace                                                                               | Kassela K. et al             |
| EPI_ISL_487377 | Hellenic Pasteur Institute, National Influenza Reference laboratory of Southern Greece & Unit of Bioinformatics and Applied Genomics | Hellenic Pasteur Institute, National Influenza Reference laboratory of Southern Greece & Unit of Bioinformatics and Applied Genomics                         | Vasiliki Pogka et al         |
| EPI_ISL_487379 | Hellenic Pasteur Institute, National Influenza Reference laboratory of Southern Greece & Unit of Bioinformatics and Applied Genomics | Hellenic Pasteur Institute, National Influenza Reference laboratory of Southern Greece & Unit of Bioinformatics and Applied Genomics                         | Vasiliki Pogka et al         |
| EPI_ISL_476835 | National Influenza Centre for Northern Greece                                                                                        | National Influenza Centre for Northern Greece                                                                                                                | Maria Christoforidi et al    |
| EPI_ISL_794818 | Greek Genome Center, Biomedical Research Foundation of the Academy of Athens (BRFAA)                                                 | Greek Genome Center, Biomedical Research Foundation of the Academy of Athens (BRFAA)                                                                         | Emmanouil Athanasiadis et al |
| EPI_ISL_794820 | Greek Genome Center, Biomedical Research Foundation of the Academy of Athens (BRFAA)                                                 | Greek Genome Center, Biomedical Research Foundation of the Academy of Athens (BRFAA)                                                                         | Emmanouil Athanasiadis et al |
| EPI_ISL_794819 | Greek Genome Center, Biomedical Research Foundation of the Academy of Athens (BRFAA)                                                 | Greek Genome Center, Biomedical Research Foundation of the Academy of Athens (BRFAA)                                                                         | Emmanouil Athanasiadis et al |
| EPI_ISL_613419 | Institut Pasteur de la Guadeloupe                                                                                                    | Institut Pasteur de la Guadeloupe                                                                                                                            | Marion Barbet et al          |
| EPI_ISL_613423 | Institut Pasteur de la Guadeloupe                                                                                                    | Institut Pasteur de la Guadeloupe                                                                                                                            | Marion Barbet et al          |
| EPI_ISL_613424 | Institut Pasteur de la Guadeloupe                                                                                                    | Institut Pasteur de la Guadeloupe                                                                                                                            | Marion Barbet et al          |
| EPI_ISL_613431 | Institut Pasteur de la Guadeloupe                                                                                                    | Institut Pasteur de la Guadeloupe                                                                                                                            | Marion Barbet et al          |
| EPI_ISL_613432 | Institut Pasteur de la Guadeloupe                                                                                                    | Institut Pasteur de la Guadeloupe                                                                                                                            | Marion Barbet et al          |
| EPI_ISL_613433 | Institut Pasteur de la Guadeloupe                                                                                                    | Institut Pasteur de la Guadeloupe                                                                                                                            | Marion Barbet et al          |
| EPI_ISL_613434 | Institut Pasteur de la Guadeloupe                                                                                                    | Institut Pasteur de la Guadeloupe                                                                                                                            | Marion Barbet et al          |
| EPI_ISL_613435 | Institut Pasteur de la Guadeloupe                                                                                                    | Institut Pasteur de la Guadeloupe                                                                                                                            | Marion Barbet et al          |

|                |                                                                            |                                                                                   |                     |
|----------------|----------------------------------------------------------------------------|-----------------------------------------------------------------------------------|---------------------|
| EPI_ISL_613438 | Institut Pasteur de la Guadeloupe                                          | Institut Pasteur de la Guadeloupe                                                 | Marion Barbet et al |
| EPI_ISL_613443 | Institut Pasteur de la Guadeloupe                                          | Institut Pasteur de la Guadeloupe                                                 | Marion Barbet et al |
| EPI_ISL_444610 | U.S. Naval Medical Research Center Biological Defense Research Directorate | U.S. Naval Medical Research Center Biological Defense Research Directorate        | Voegtly et al       |
| EPI_ISL_444998 | Naval Health Research Center                                               | Naval Medical Research Center Biological Defense Research Directorate             | Logan Voegtly et al |
| EPI_ISL_444999 | Naval Health Research Center                                               | Naval Medical Research Center Biological Defense Research Directorate             | Logan Voegtly et al |
| EPI_ISL_445000 | Naval Health Research Center                                               | Naval Medical Research Center Biological Defense Research Directorate             | Logan Voegtly et al |
| EPI_ISL_444969 | Guangzhou Eighth People's Hospital (Jiahe Sector)                          | Institute of Human Virology, Zhongshan School of Medicine, Sun Yat-sen University | Junsong Zhang et al |
| EPI_ISL_429080 | The First Affiliated Hospital of Guangzhou Medical University              | BGI-shenzhen & The First Affiliated Hospital of Guangzhou Medical University      | et al               |
| EPI_ISL_429081 | The First Affiliated Hospital of Guangzhou Medical University              | BGI-shenzhen & The First Affiliated Hospital of Guangzhou Medical University      | et al               |
| EPI_ISL_429089 | The First Affiliated Hospital of Guangzhou Medical University              | BGI-shenzhen & The First Affiliated Hospital of Guangzhou Medical University      | Yanqun Wang et al   |
| EPI_ISL_837579 | Laboratorio Nacional de Salud                                              | Laboratory of Respiratory Viruses and Measles, Oswaldo Cruz Institute, FIOCRUZ    | Paola Resende et al |
| EPI_ISL_837580 | Laboratorio Nacional de Salud                                              | Laboratory of Respiratory Viruses and Measles, Oswaldo Cruz Institute, FIOCRUZ    | Paola Resende et al |
| EPI_ISL_837581 | Laboratorio Nacional de Salud                                              | Laboratory of Respiratory Viruses and Measles, Oswaldo Cruz Institute, FIOCRUZ    | Paola Resende et al |
| EPI_ISL_837582 | Laboratorio Nacional de Salud                                              | Laboratory of Respiratory Viruses and Measles, Oswaldo Cruz Institute, FIOCRUZ    | Paola Resende et al |
| EPI_ISL_837583 | Laboratorio Nacional de Salud                                              | Laboratory of Respiratory Viruses and Measles, Oswaldo Cruz Institute, FIOCRUZ    | Paola Resende et al |
| EPI_ISL_837551 | Laboratorio Nacional de Salud                                              | Laboratory of Respiratory Viruses and Measles, Oswaldo Cruz Institute, FIOCRUZ    | Paola Resende et al |
| EPI_ISL_837585 | Laboratorio Nacional de Salud                                              | Laboratory of Respiratory Viruses and Measles, Oswaldo Cruz Institute, FIOCRUZ    | Paola Resende et al |
| EPI_ISL_837586 | Laboratorio Nacional de Salud                                              | Laboratory of Respiratory Viruses and Measles, Oswaldo Cruz Institute, FIOCRUZ    | Paola Resende et al |
| EPI_ISL_837587 | Laboratorio Nacional de Salud                                              | Laboratory of Respiratory Viruses and Measles, Oswaldo Cruz Institute, FIOCRUZ    | Paola Resende et al |
| EPI_ISL_837588 | Laboratorio Nacional de Salud                                              | Laboratory of Respiratory Viruses and Measles, Oswaldo Cruz Institute, FIOCRUZ    | Paola Resende et al |
| EPI_ISL_837589 | Laboratorio Nacional de Salud                                              | Laboratory of Respiratory Viruses and Measles, Oswaldo Cruz Institute, FIOCRUZ    | Paola Resende et al |
| EPI_ISL_837590 | Laboratorio Nacional de Salud                                              | Laboratory of Respiratory Viruses and Measles, Oswaldo Cruz Institute, FIOCRUZ    | Paola Resende et al |
| EPI_ISL_837591 | Laboratorio Nacional de Salud                                              | Laboratory of Respiratory Viruses and Measles, Oswaldo Cruz Institute, FIOCRUZ    | Paola Resende et al |
| EPI_ISL_837593 | Laboratorio Nacional de Salud                                              | Laboratory of Respiratory Viruses and Measles, Oswaldo Cruz Institute, FIOCRUZ    | Paola Resende et al |
| EPI_ISL_837594 | Laboratorio Nacional de Salud                                              | Laboratory of Respiratory Viruses and Measles, Oswaldo Cruz Institute, FIOCRUZ    | Paola Resende et al |
| EPI_ISL_837595 | Laboratorio Nacional de Salud                                              | Laboratory of Respiratory Viruses and Measles, Oswaldo Cruz Institute, FIOCRUZ    | Paola Resende et al |
| EPI_ISL_837596 | Laboratorio Nacional de Salud                                              | Laboratory of Respiratory Viruses and Measles, Oswaldo Cruz Institute, FIOCRUZ    | Paola Resende et al |



|                |                                                                                                                                                                                                                                |                                                                                                                                                                                                                                |                           |
|----------------|--------------------------------------------------------------------------------------------------------------------------------------------------------------------------------------------------------------------------------|--------------------------------------------------------------------------------------------------------------------------------------------------------------------------------------------------------------------------------|---------------------------|
| EPI_ISL_837552 | Laboratorio Nacional de Salud                                                                                                                                                                                                  | Laboratory of Respiratory Viruses and Measles, Oswaldo Cruz Institute, FIOCRUZ                                                                                                                                                 | Paola Resende et al       |
| EPI_ISL_509695 | Guatemala Ministry of Public Health                                                                                                                                                                                            | Pathogen Discovery, Respiratory Viruses Branch, Division of Viral Diseases, Centers for Disease Control and Prevention                                                                                                         | Ying Tao et al            |
| EPI_ISL_509696 | Guatemala Ministry of Public Health                                                                                                                                                                                            | Pathogen Discovery, Respiratory Viruses Branch, Division of Viral Diseases, Centers for Disease Control and Prevention                                                                                                         | Ying Tao et al            |
| EPI_ISL_509710 | Guatemala Ministry of Public Health                                                                                                                                                                                            | Pathogen Discovery, Respiratory Viruses Branch, Division of Viral Diseases, Centers for Disease Control and Prevention                                                                                                         | Jing Zhang et al          |
| EPI_ISL_509697 | Guatemala Ministry of Public Health                                                                                                                                                                                            | Pathogen Discovery, Respiratory Viruses Branch, Division of Viral Diseases, Centers for Disease Control and Prevention                                                                                                         | Ying Tao et al            |
| EPI_ISL_509698 | Guatemala Ministry of Public Health                                                                                                                                                                                            | Pathogen Discovery, Respiratory Viruses Branch, Division of Viral Diseases, Centers for Disease Control and Prevention                                                                                                         | Ying Tao et al            |
| EPI_ISL_509699 | Guatemala Ministry of Public Health                                                                                                                                                                                            | Pathogen Discovery, Respiratory Viruses Branch, Division of Viral Diseases, Centers for Disease Control and Prevention                                                                                                         | Ying Tao et al            |
| EPI_ISL_509700 | Guatemala Ministry of Public Health                                                                                                                                                                                            | Pathogen Discovery, Respiratory Viruses Branch, Division of Viral Diseases, Centers for Disease Control and Prevention                                                                                                         | Ying Tao et al            |
| EPI_ISL_509701 | Guatemala Ministry of Public Health                                                                                                                                                                                            | Pathogen Discovery, Respiratory Viruses Branch, Division of Viral Diseases, Centers for Disease Control and Prevention                                                                                                         | Ying Tao et al            |
| EPI_ISL_509702 | Guatemala Ministry of Public Health                                                                                                                                                                                            | Pathogen Discovery, Respiratory Viruses Branch, Division of Viral Diseases, Centers for Disease Control and Prevention                                                                                                         | Ying Tao et al            |
| EPI_ISL_509703 | Guatemala Ministry of Public Health                                                                                                                                                                                            | Pathogen Discovery, Respiratory Viruses Branch, Division of Viral Diseases, Centers for Disease Control and Prevention                                                                                                         | Ying Tao et al            |
| EPI_ISL_815399 | Centogene                                                                                                                                                                                                                      | Centogene                                                                                                                                                                                                                      | Peter Bauer et al         |
| EPI_ISL_815398 | Centogene                                                                                                                                                                                                                      | Centogene                                                                                                                                                                                                                      | Peter Bauer et al         |
| EPI_ISL_788933 | Centre de Recherche et de Formation en Infectiologie Guinée                                                                                                                                                                    | TransVIHMI, IRD/INSERM/Monpellier University                                                                                                                                                                                   | Alpha Kabinet KEITA et al |
| EPI_ISL_788934 | Centre de Recherche et de Formation en Infectiologie Guinée                                                                                                                                                                    | TransVIHMI, IRD/INSERM/Monpellier University                                                                                                                                                                                   | Alpha Kabinet KEITA et al |
| EPI_ISL_788935 | Centre de Recherche et de Formation en Infectiologie Guinée                                                                                                                                                                    | TransVIHMI, IRD/INSERM/Monpellier University                                                                                                                                                                                   | Alpha Kabinet KEITA et al |
| EPI_ISL_788936 | Centre de Recherche et de Formation en Infectiologie Guinée                                                                                                                                                                    | TransVIHMI, IRD/INSERM/Monpellier University                                                                                                                                                                                   | Alpha Kabinet KEITA et al |
| EPI_ISL_788937 | Centre de Recherche et de Formation en Infectiologie Guinée                                                                                                                                                                    | TransVIHMI, IRD/INSERM/Monpellier University                                                                                                                                                                                   | Alpha Kabinet KEITA et al |
| EPI_ISL_788938 | Centre de Recherche et de Formation en Infectiologie Guinée                                                                                                                                                                    | TransVIHMI, IRD/INSERM/Monpellier University                                                                                                                                                                                   | Alpha Kabinet KEITA et al |
| EPI_ISL_999032 | Institut Pasteur de Guinée                                                                                                                                                                                                     | Institut Pasteur de Dakar                                                                                                                                                                                                      | Grayo Solene et al        |
| EPI_ISL_421232 | Hangzhou Center for Diseases Control and Prevention                                                                                                                                                                            | Hangzhou Center for Diseases Control and Prevention                                                                                                                                                                            | Jun Li et al              |
| EPI_ISL_421229 | Hangzhou Center for Diseases Control and Prevention                                                                                                                                                                            | Hangzhou Center for Diseases Control and Prevention                                                                                                                                                                            | Jun Li et al              |
| EPI_ISL_482579 | Hangzhou Center for Diseases Control and Prevention                                                                                                                                                                            | Hangzhou Center for Diseases Control and Prevention                                                                                                                                                                            | Jun Li et al              |
| EPI_ISL_482580 | Hangzhou Center for Diseases Control and Prevention                                                                                                                                                                            | Hangzhou Center for Diseases Control and Prevention                                                                                                                                                                            | Jun Li et al              |
| EPI_ISL_482581 | Hangzhou Center for Diseases Control and Prevention                                                                                                                                                                            | Hangzhou Center for Diseases Control and Prevention                                                                                                                                                                            | Jun Li et al              |
| EPI_ISL_482585 | Hangzhou Center for Diseases Control and Prevention                                                                                                                                                                            | Hangzhou Center for Diseases Control and Prevention                                                                                                                                                                            | Jun Li et al              |
| EPI_ISL_415711 | State Key Laboratory for Diagnosis and Treatment of Infectious Diseases, National Clinical Research Center for Infectious Diseases, First Affiliated Hospital, Zhejiang University School of Medicine, Hangzhou, China. 310003 | State Key Laboratory for Diagnosis and Treatment of Infectious Diseases, National Clinical Research Center for Infectious Diseases, First Affiliated Hospital, Zhejiang University School of Medicine, Hangzhou, China. 310003 | Hangping Yao et al        |
| EPI_ISL_850946 | National Institute for Viral Disease Control and Prevention, China CDC                                                                                                                                                         | National Institute for Viral Disease Control and Prevention, China CDC                                                                                                                                                         | Xiang Zhao et al          |
| EPI_ISL_796012 | Hebei Provincial Center for Disease Control and Prevention, Shijiazhuang, Hebei Province; National Institute for Viral Disease Control and Prevention, China CDC                                                               | Hebei Provincial Center for Disease Control and Prevention, Shijiazhuang, Hebei Province; National Institute for Viral Disease Control and Prevention, China CDC                                                               | Shunxiang Qi et al        |







|                |                                                          |                                                               |                          |
|----------------|----------------------------------------------------------|---------------------------------------------------------------|--------------------------|
| EPI_ISL_536411 | Medtimes Molecular Laboratory                            | Medtimes Molecular Laboratory                                 | Eric Chan et al          |
| EPI_ISL_417064 | Prince of Wales Hospital                                 | Hong Kong Department of Health                                | Alan K.L. Tsang et al    |
| EPI_ISL_412029 | Hong Kong Department of Health                           | The University of Hong Kong                                   | Dominic N.C. Tsang et al |
| EPI_ISL_412030 | Hong Kong Department of Health                           | School of Public Health, The University of Hong Kong          | Dominic N.C. Tsang et al |
| EPI_ISL_539823 | Communicable Disease Branch                              | Hong Kong Department of Health                                | Alan K.L. Tsang et al    |
| EPI_ISL_733569 | CHAI WAN FAMILIES CLINIC                                 | Hong Kong Department of Health                                | Alan K.L. Tsang et al    |
| EPI_ISL_414528 | Hong Kong Department of Health                           | School of Public Health, The University of Hong Kong          | Dominic N.C. Tsang et al |
| EPI_ISL_414569 | Hong Kong Department of Health                           | School of Public Health, The University of Hong Kong          | Dominic N.C. Tsang et al |
| EPI_ISL_414571 | Hong Kong Department of Health                           | School of Public Health, The University of Hong Kong          | Dominic N.C. Tsang et al |
| EPI_ISL_539850 | Pok Oi Hospital                                          | Hong Kong Department of Health                                | Alan K.L. Tsang et al    |
| EPI_ISL_539851 | Pok Oi Hospital                                          | Hong Kong Department of Health                                | Alan K.L. Tsang et al    |
| EPI_ISL_539803 | Queen Mary Hospital                                      | Hong Kong Department of Health                                | Alan K.L. Tsang et al    |
| EPI_ISL_539816 | Queen Mary Hospital                                      | Hong Kong Department of Health                                | Alan K.L. Tsang et al    |
| EPI_ISL_539819 | Tuen Mun Hospital                                        | Hong Kong Department of Health                                | Alan K.L. Tsang et al    |
| EPI_ISL_539818 | Tuen Mun Hospital                                        | Hong Kong Department of Health                                | Alan K.L. Tsang et al    |
| EPI_ISL_539817 | Queen Mary Hospital                                      | Hong Kong Department of Health                                | Alan K.L. Tsang et al    |
| EPI_ISL_760036 | Hong Kong Department of Health                           | School of Public Health, The University of Hong Kong          | Daniel Chu et al         |
| EPI_ISL_760037 | Hong Kong Department of Health                           | School of Public Health, The University of Hong Kong          | Daniel Chu et al         |
| EPI_ISL_760039 | Hong Kong Department of Health                           | School of Public Health, The University of Hong Kong          | Daniel Chu et al         |
| EPI_ISL_760041 | Hong Kong Department of Health                           | School of Public Health, The University of Hong Kong          | Daniel Chu et al         |
| EPI_ISL_760042 | Hong Kong Department of Health                           | School of Public Health, The University of Hong Kong          | Daniel Chu et al         |
| EPI_ISL_760047 | Hong Kong Department of Health                           | School of Public Health, The University of Hong Kong          | Daniel Chu et al         |
| EPI_ISL_760055 | Hong Kong Department of Health                           | School of Public Health, The University of Hong Kong          | Daniel Chu et al         |
| EPI_ISL_733571 | Queen Mary Hospital                                      | Hong Kong Department of Health                                | Alan K.L. Tsang et al    |
| EPI_ISL_733570 | POK OI HOSPITAL                                          | Hong Kong Department of Health                                | Alan K.L. Tsang et al    |
| EPI_ISL_759897 | United Christian Hospital                                | Hong Kong Department of Health                                | Alan K.L. Tsang et al    |
| EPI_ISL_759895 | United Christian Hospital                                | Hong Kong Department of Health                                | Alan K.L. Tsang et al    |
| EPI_ISL_759898 | United Christian Hospital                                | Hong Kong Department of Health                                | Alan K.L. Tsang et al    |
| EPI_ISL_955905 | Pamela Youde Nethersole Eastern Hospital                 | Hong Kong Department of Health                                | Alan K.L. Tsang et al    |
| EPI_ISL_435421 | Virological Research Group, Szentágothai Research Centre | Bioinformatics Research Group, Szentágothai Research Centre   | Péter Urbán et al        |
| EPI_ISL_526225 | Hungarian Defence Forces Military Medical Centre         | National Laboratory of Virology, Szentágothai Research Centre | Endre Gábor Tóth et al   |
| EPI_ISL_526219 | Hungarian Defence Forces Military Medical Centre         | National Laboratory of Virology, Szentágothai Research Centre | Endre Gábor Tóth et al   |
| EPI_ISL_526236 | Hungarian Defence Forces Military Medical Centre         | National Laboratory of Virology, Szentágothai Research Centre | Endre Gábor Tóth et al   |
| EPI_ISL_526220 | Hungarian Defence Forces Military Medical Centre         | National Laboratory of Virology, Szentágothai Research Centre | Endre Gábor Tóth et al   |
| EPI_ISL_526221 | Hungarian Defence Forces Military Medical Centre         | National Laboratory of Virology, Szentágothai Research Centre | Endre Gábor Tóth et al   |
| EPI_ISL_526222 | Hungarian Defence Forces Military Medical Centre         | National Laboratory of Virology, Szentágothai Research Centre | Endre Gábor Tóth et al   |
| EPI_ISL_526232 | Hungarian Defence Forces Military Medical Centre         | National Laboratory of Virology, Szentágothai Research Centre | Endre Gábor Tóth et al   |
| EPI_ISL_526223 | Hungarian Defence Forces Military Medical Centre         | National Laboratory of Virology, Szentágothai Research Centre | Endre Gábor Tóth et al   |
| EPI_ISL_526224 | Hungarian Defence Forces Military Medical Centre         | National Laboratory of Virology, Szentágothai Research Centre | Endre Gábor Tóth et al   |





|                |                                             |                 |                             |
|----------------|---------------------------------------------|-----------------|-----------------------------|
| EPI_ISL_827358 | deCODE genetics                             | deCODE genetics | Daniel F Gudbjartsson et al |
| EPI_ISL_827378 | deCODE genetics                             | deCODE genetics | Daniel F Gudbjartsson et al |
| EPI_ISL_417681 | The National University Hospital of Iceland | deCODE genetics | Daniel F Gudbjartsson et al |
| EPI_ISL_827401 | deCODE genetics                             | deCODE genetics | Daniel F Gudbjartsson et al |
| EPI_ISL_827437 | The National University Hospital of Iceland | deCODE genetics | Daniel F Gudbjartsson et al |
| EPI_ISL_827467 | deCODE genetics                             | deCODE genetics | Daniel F Gudbjartsson et al |
| EPI_ISL_827508 | deCODE genetics                             | deCODE genetics | Daniel F Gudbjartsson et al |
| EPI_ISL_827513 | The National University Hospital of Iceland | deCODE genetics | Daniel F Gudbjartsson et al |
| EPI_ISL_827825 | The National University Hospital of Iceland | deCODE genetics | Daniel F Gudbjartsson et al |
| EPI_ISL_827856 | deCODE genetics                             | deCODE genetics | Daniel F Gudbjartsson et al |
| EPI_ISL_827874 | deCODE genetics                             | deCODE genetics | Daniel F Gudbjartsson et al |
| EPI_ISL_827881 | The National University Hospital of Iceland | deCODE genetics | Daniel F Gudbjartsson et al |
| EPI_ISL_827896 | deCODE genetics                             | deCODE genetics | Daniel F Gudbjartsson et al |
| EPI_ISL_827897 | deCODE genetics                             | deCODE genetics | Daniel F Gudbjartsson et al |
| EPI_ISL_827924 | deCODE genetics                             | deCODE genetics | Daniel F Gudbjartsson et al |
| EPI_ISL_827931 | deCODE genetics                             | deCODE genetics | Daniel F Gudbjartsson et al |
| EPI_ISL_827933 | deCODE genetics                             | deCODE genetics | Daniel F Gudbjartsson et al |
| EPI_ISL_828009 | The National University Hospital of Iceland | deCODE genetics | Daniel F Gudbjartsson et al |
| EPI_ISL_828018 | deCODE genetics                             | deCODE genetics | Daniel F Gudbjartsson et al |
| EPI_ISL_828024 | deCODE genetics                             | deCODE genetics | Daniel F Gudbjartsson et al |
| EPI_ISL_828066 | The National University Hospital of Iceland | deCODE genetics | Daniel F Gudbjartsson et al |
| EPI_ISL_828215 | The National University Hospital of Iceland | deCODE genetics | Daniel F Gudbjartsson et al |
| EPI_ISL_828218 | deCODE genetics                             | deCODE genetics | Daniel F Gudbjartsson et al |
| EPI_ISL_828270 | The National University Hospital of Iceland | deCODE genetics | Daniel F Gudbjartsson et al |
| EPI_ISL_828295 | deCODE genetics                             | deCODE genetics | Daniel F Gudbjartsson et al |
| EPI_ISL_828477 | deCODE genetics                             | deCODE genetics | Daniel F Gudbjartsson et al |
| EPI_ISL_828503 | The National University Hospital of Iceland | deCODE genetics | Daniel F Gudbjartsson et al |
| EPI_ISL_828507 | The National University Hospital of Iceland | deCODE genetics | Daniel F Gudbjartsson et al |
| EPI_ISL_828589 | The National University Hospital of Iceland | deCODE genetics | Daniel F Gudbjartsson et al |
| EPI_ISL_828864 | deCODE genetics                             | deCODE genetics | Daniel F Gudbjartsson et al |
| EPI_ISL_828902 | deCODE genetics                             | deCODE genetics | Daniel F Gudbjartsson et al |
| EPI_ISL_828941 | deCODE genetics                             | deCODE genetics | Daniel F Gudbjartsson et al |
| EPI_ISL_417851 | The National University Hospital of Iceland | deCODE genetics | Daniel F Gudbjartsson et al |
| EPI_ISL_829002 | The National University Hospital of Iceland | deCODE genetics | Daniel F Gudbjartsson et al |
| EPI_ISL_829060 | The National University Hospital of Iceland | deCODE genetics | Daniel F Gudbjartsson et al |
| EPI_ISL_829091 | deCODE genetics                             | deCODE genetics | Daniel F Gudbjartsson et al |
| EPI_ISL_829167 | deCODE genetics                             | deCODE genetics | Daniel F Gudbjartsson et al |
| EPI_ISL_829174 | deCODE genetics                             | deCODE genetics | Daniel F Gudbjartsson et al |
| EPI_ISL_417687 | The National University Hospital of Iceland | deCODE genetics | Daniel F Gudbjartsson et al |



|                |                                                                       |                                                    |                             |
|----------------|-----------------------------------------------------------------------|----------------------------------------------------|-----------------------------|
| EPI_ISL_829202 | deCODE genetics                                                       | deCODE genetics                                    | Daniel F Gudbjartsson et al |
| EPI_ISL_829323 | deCODE genetics                                                       | deCODE genetics                                    | Daniel F Gudbjartsson et al |
| EPI_ISL_829424 | deCODE genetics                                                       | deCODE genetics                                    | Daniel F Gudbjartsson et al |
| EPI_ISL_829549 | deCODE genetics                                                       | deCODE genetics                                    | Daniel F Gudbjartsson et al |
| EPI_ISL_829683 | deCODE genetics                                                       | deCODE genetics                                    | Daniel F Gudbjartsson et al |
| EPI_ISL_829708 | The National University Hospital of Iceland                           | deCODE genetics                                    | Daniel F Gudbjartsson et al |
| EPI_ISL_829777 | deCODE genetics                                                       | deCODE genetics                                    | Daniel F Gudbjartsson et al |
| EPI_ISL_829862 | deCODE genetics                                                       | deCODE genetics                                    | Daniel F Gudbjartsson et al |
| EPI_ISL_829891 | The National University Hospital of Iceland                           | deCODE genetics                                    | Daniel F Gudbjartsson et al |
| EPI_ISL_829955 | The National University Hospital of Iceland                           | deCODE genetics                                    | Daniel F Gudbjartsson et al |
| EPI_ISL_829968 | deCODE genetics                                                       | deCODE genetics                                    | Daniel F Gudbjartsson et al |
| EPI_ISL_829972 | deCODE genetics                                                       | deCODE genetics                                    | Daniel F Gudbjartsson et al |
| EPI_ISL_830032 | deCODE genetics                                                       | deCODE genetics                                    | Daniel F Gudbjartsson et al |
| EPI_ISL_830049 | deCODE genetics                                                       | deCODE genetics                                    | Daniel F Gudbjartsson et al |
| EPI_ISL_830088 | deCODE genetics                                                       | deCODE genetics                                    | Daniel F Gudbjartsson et al |
| EPI_ISL_830191 | The National University Hospital of Iceland                           | deCODE genetics                                    | Daniel F Gudbjartsson et al |
| EPI_ISL_830209 | The National University Hospital of Iceland                           | deCODE genetics                                    | Daniel F Gudbjartsson et al |
| EPI_ISL_830226 | deCODE genetics                                                       | deCODE genetics                                    | Daniel F Gudbjartsson et al |
| EPI_ISL_830245 | The National University Hospital of Iceland                           | deCODE genetics                                    | Daniel F Gudbjartsson et al |
| EPI_ISL_830318 | deCODE genetics                                                       | deCODE genetics                                    | Daniel F Gudbjartsson et al |
| EPI_ISL_830367 | The National University Hospital of Iceland                           | deCODE genetics                                    | Daniel F Gudbjartsson et al |
| EPI_ISL_830396 | deCODE genetics                                                       | deCODE genetics                                    | Daniel F Gudbjartsson et al |
| EPI_ISL_830479 | The National University Hospital of Iceland                           | deCODE genetics                                    | Daniel F Gudbjartsson et al |
| EPI_ISL_830502 | The National University Hospital of Iceland                           | deCODE genetics                                    | Daniel F Gudbjartsson et al |
| EPI_ISL_830529 | The National University Hospital of Iceland                           | deCODE genetics                                    | Daniel F Gudbjartsson et al |
| EPI_ISL_862527 | Kurnool Medical College (KMC)                                         | CSIR Institute of Genomics and Integrative Biology | Pallavali Roja Rani et al   |
| EPI_ISL_862529 | Kurnool Medical College (KMC)                                         | CSIR Institute of Genomics and Integrative Biology | Pallavali Roja Rani et al   |
| EPI_ISL_605808 | Clinical Virology Laboratory, Institute of Liver and Biliary Sciences | ILBS - IGIB                                        | Ekta Gupta et al            |
| EPI_ISL_605813 | Clinical Virology Laboratory, Institute of Liver and Biliary Sciences | ILBS - IGIB                                        | Ekta Gupta et al            |
| EPI_ISL_459916 | Devki Devi Foundation, a unit of Max Healthcare                       | CSIR-IGIB/Max                                      | Rajesh Pandey# et al        |
| EPI_ISL_459924 | Devki Devi Foundation, a unit of Max Healthcare                       | CSIR-IGIB/Max                                      | Rajesh Pandey# et al        |
| EPI_ISL_825034 | B.J. Medical College and Civil hospital, Ahmedabad                    | Gujarat Biotechnology Research Centre              | Kamlesh J Upadhyay et al    |
| EPI_ISL_825035 | B.J. Medical College and Civil hospital, Ahmedabad                    | Gujarat Biotechnology Research Centre              | Nilima Shah et al           |
| EPI_ISL_825042 | B.J. Medical College and Civil hospital, Ahmedabad                    | Gujarat Biotechnology Research Centre              | Apurvasinh Puvar et al      |
| EPI_ISL_825043 | NHL Municipal Medical College, Ahmedabad                              | Gujarat Biotechnology Research Centre              | Jayshri Pethani et al       |
| EPI_ISL_825054 | GMERS Medical College and Hospital, Gotri, Vadodara                   | Gujarat Biotechnology Research Centre              | Kalpesh Mistry et al        |
| EPI_ISL_426414 | Sir M P Shah Government Medical College                               | Gujarat Biotechnology Research Centre              | Ramesh Pandit et al         |
| EPI_ISL_426415 | Sir M P Shah Government Medical College, Jamnagar                     | Gujarat Biotechnology Research Centre, Gandhinagar | Ramesh Pandit et al         |
| EPI_ISL_476869 | Department of MicroBiology, Government Medical College, Surat         | Gujarat Biotechnology Research Centre              | Nikha Trivedi et al         |

|                |                                                                 |                                                                                              |                                            |
|----------------|-----------------------------------------------------------------|----------------------------------------------------------------------------------------------|--------------------------------------------|
| EPI_ISL_447031 | B.J. Medical College and Civil hospital                         | Gujarat Biotechnology Research Centre                                                        | Ramesh Pandit et al                        |
| EPI_ISL_447554 | GMERS Medical College and Hospital, Gandhinagar                 | Gujarat Biotechnology Research Centre                                                        | Zuber Saiyed et al                         |
| EPI_ISL_811163 | Dharwad                                                         | CSIR Institute of Genomics and Integrative Biology                                           | Dr. Shivarudrapp B<br>Bhairappanavar et al |
| EPI_ISL_508290 | Indian Institute of Science                                     | National Institute of Biomedical Genomics                                                    | Arindam Maitra et al                       |
| EPI_ISL_995191 | RAILWAY HOSPITAL                                                | Department of Neurovirology, National Institute of Mental Health and Neurosciences (NIMHANS) | Chitra Pattabiraman et al                  |
| EPI_ISL_995709 | BANGALORE MEDICAL COLLEGE AND RESEARCH INSTITUTE                | Department of Neurovirology, National Institute of Mental Health and Neurosciences (NIMHANS) | Chitra Pattabiraman et al                  |
| EPI_ISL_995710 | BANGALORE MEDICAL COLLEGE AND RESEARCH INSTITUTE                | Department of Neurovirology, National Institute of Mental Health and Neurosciences (NIMHANS) | Chitra Pattabiraman et al                  |
| EPI_ISL_995701 | JAYANAGAR GENERAL HOSPITAL                                      | Department of Neurovirology, National Institute of Mental Health and Neurosciences (NIMHANS) | Chitra Pattabiraman et al                  |
| EPI_ISL_995711 | BANGALORE MEDICAL COLLEGE AND RESEARCH INSTITUTE                | Department of Neurovirology, National Institute of Mental Health and Neurosciences (NIMHANS) | Chitra Pattabiraman et al                  |
| EPI_ISL_995713 | KEMPEGOWDA INTERNATIONAL AIRPORT                                | Department of Neurovirology, National Institute of Mental Health and Neurosciences (NIMHANS) | Chitra Pattabiraman et al                  |
| EPI_ISL_995718 | BBMP Urban PHC                                                  | Department of Neurovirology, National Institute of Mental Health and Neurosciences (NIMHANS) | Chitra Pattabiraman et al                  |
| EPI_ISL_995719 | BBMP Urban PHC                                                  | Department of Neurovirology, National Institute of Mental Health and Neurosciences (NIMHANS) | Chitra Pattabiraman et al                  |
| EPI_ISL_995723 | RAILWAY HOSPITAL                                                | Department of Neurovirology, National Institute of Mental Health and Neurosciences (NIMHANS) | Chitra Pattabiraman et al                  |
| EPI_ISL_995728 | BBMP Urban PHC                                                  | Department of Neurovirology, National Institute of Mental Health and Neurosciences (NIMHANS) | Chitra Pattabiraman et al                  |
| EPI_ISL_995739 | BBMP Urban PHC                                                  | Department of Neurovirology, National Institute of Mental Health and Neurosciences (NIMHANS) | Chitra Pattabiraman et al                  |
| EPI_ISL_995740 | BBMP Urban PHC                                                  | Department of Neurovirology, National Institute of Mental Health and Neurosciences (NIMHANS) | Chitra Pattabiraman et al                  |
| EPI_ISL_995743 | Jayanagar General Hospital                                      | Department of Neurovirology, National Institute of Mental Health and Neurosciences (NIMHANS) | Chitra Pattabiraman et al                  |
| EPI_ISL_995747 | Railway Hospital                                                | Department of Neurovirology, National Institute of Mental Health and Neurosciences (NIMHANS) | Chitra Pattabiraman et al                  |
| EPI_ISL_995753 | RAILWAY HOSPITAL                                                | Department of Neurovirology, National Institute of Mental Health and Neurosciences (NIMHANS) | Chitra Pattabiraman et al                  |
| EPI_ISL_995756 | BBMP Urban PHC                                                  | Department of Neurovirology, National Institute of Mental Health and Neurosciences (NIMHANS) | Chitra Pattabiraman et al                  |
| EPI_ISL_995724 | BANGALORE MEDICAL COLLEGE AND RESEARCH INSTITUTE                | Department of Neurovirology, National Institute of Mental Health and Neurosciences (NIMHANS) | Chitra Pattabiraman et al                  |
| EPI_ISL_825141 | BBMP Urban PHC                                                  | Department of Neurovirology, National Institute of Mental Health and Neurosciences (NIMHANS) | Chitra Pattabiraman et al                  |
| EPI_ISL_825143 | BBMP Urban PHC                                                  | Department of Neurovirology, National Institute of Mental Health and Neurosciences (NIMHANS) | Chitra Pattabiraman et al                  |
| EPI_ISL_845877 | National Institute of Mental Health and Neurosciences (NIMHANS) | Department of Neurovirology, National Institute of Mental Health and Neurosciences (NIMHANS) | Chitra Pattabiraman et al                  |
| EPI_ISL_845883 | BBMP Urban PHC                                                  | Department of Neurovirology, National Institute of Mental Health and Neurosciences (NIMHANS) | Chitra Pattabiraman et al                  |
| EPI_ISL_860189 | BBMP Urban PHC                                                  | Department of Neurovirology, National Institute of Mental Health and Neurosciences (NIMHANS) | Chitra Pattabiraman et al                  |
| EPI_ISL_860190 | Railway Hospital                                                | Department of Neurovirology, National Institute of Mental Health and Neurosciences (NIMHANS) | Chitra Pattabiraman et al                  |

|                |                                                                                                |                                                                                                                         |                                  |
|----------------|------------------------------------------------------------------------------------------------|-------------------------------------------------------------------------------------------------------------------------|----------------------------------|
| EPI_ISL_860197 | BBMP Urban PHC                                                                                 | Department of Neurovirology, National Institute of Mental Health and Neurosciences (NIMHANS)                            | Chitra Pattabiraman et al        |
| EPI_ISL_995174 | BBMP Urban PHC                                                                                 | Department of Neurovirology, National Institute of Mental Health and Neurosciences (NIMHANS)                            | Chitra Pattabiraman et al        |
| EPI_ISL_995176 | BBMP Urban PHC                                                                                 | Department of Neurovirology, National Institute of Mental Health and Neurosciences (NIMHANS)                            | Chitra Pattabiraman et al        |
| EPI_ISL_995179 | BBMP Urban PHC                                                                                 | Department of Neurovirology, National Institute of Mental Health and Neurosciences (NIMHANS)                            | Chitra Pattabiraman et al        |
| EPI_ISL_413522 | Indian Council of Medical Research - National Institute of Virology                            | National Influenza Center, Indian Council of Medical Research - National Institute of Virology                          | Potdar V et al                   |
| EPI_ISL_413523 | Indian Council of Medical Research-National Institute of Virology                              | National Influenza Center, Indian Council of Medical Research-National Institute of Virology                            | Potdar V et al                   |
| EPI_ISL_699712 | Hematopathology Laboratory, ACTREC, TMC                                                        | Hematopathology Laboratory, ACTREC, TMC                                                                                 | Hematopathology Laboratory et al |
| EPI_ISL_699713 | Hematopathology Laboratory, ACTREC, TMC                                                        | Hematopathology Laboratory, ACTREC, TMC                                                                                 | Hematopathology Laboratory et al |
| EPI_ISL_699721 | Hematopathology Laboratory, ACTREC, TMC                                                        | Hematopathology Laboratory, ACTREC, TMC                                                                                 | Hematopathology Laboratory et al |
| EPI_ISL_700251 | Hematopathology Laboratory, ACTREC, TMC                                                        | Hematopathology Laboratory, ACTREC, TMC                                                                                 | Hematopathology Laboratory et al |
| EPI_ISL_508266 | Government Medical College                                                                     | National Institute of Biomedical Genomics                                                                               | Arindam Maitra et al             |
| EPI_ISL_528422 | TNMC & BYL NAIR CH. HOSPITAL                                                                   | Institute of Genomics and Integrative Biology - Council of Scientific and Industrial Research                           | Rajesh Pandey et al              |
| EPI_ISL_577678 | NIV Influenza                                                                                  | NIV Influenza                                                                                                           | Potdar V et al                   |
| EPI_ISL_481197 | Immunogenomics lab, Institute of Life Sciences, Bhubaneswar                                    | Immunogenomics lab, Institute of Life Sciences, Bhubaneswar                                                             | Sunil Raghav et al               |
| EPI_ISL_539751 | CSIR-Centre for Cellular and Molecular Biology                                                 | CSIR-Centre for Cellular and Molecular Biology                                                                          | Pratheusa Maccha et al           |
| EPI_ISL_539729 | CSIR-Centre for Cellular and Molecular Biology                                                 | CSIR-Centre for Cellular and Molecular Biology                                                                          | Shagufta Khan et al              |
| EPI_ISL_910178 | CSIR-Centre for Cellular and Molecular Biology                                                 | CSIR-Centre for Cellular and Molecular Biology                                                                          | Payel Mukherjee et al            |
| EPI_ISL_910282 | CSIR-Centre for Cellular and Molecular Biology                                                 | CSIR-Centre for Cellular and Molecular Biology                                                                          | Payel Mukherjee et al            |
| EPI_ISL_447557 | CSIR-Centre for Cellular and Molecular Biology                                                 | CSIR-Centre for Cellular and Molecular Biology                                                                          | Payel Mukherjee et al            |
| EPI_ISL_447560 | CSIR-Centre for Cellular and Molecular Biology                                                 | CSIR-Centre for Cellular and Molecular Biology                                                                          | Payel Mukherjee et al            |
| EPI_ISL_447562 | CSIR-Centre for Cellular and Molecular Biology                                                 | CSIR-Centre for Cellular and Molecular Biology                                                                          | Shagufta Khan et al              |
| EPI_ISL_450327 | CSIR-Centre for Cellular and Molecular Biology                                                 | CSIR-Centre for Cellular and Molecular Biology                                                                          | Sofia Banu et al                 |
| EPI_ISL_447574 | CSIR-Centre for Cellular and Molecular Biology                                                 | CSIR-Centre for Cellular and Molecular Biology                                                                          | Namami Gaur et al                |
| EPI_ISL_447564 | CSIR-Centre for Cellular and Molecular Biology                                                 | CSIR-Centre for Cellular and Molecular Biology                                                                          | Sofia Banu et al                 |
| EPI_ISL_458080 | CSIR-Centre for Cellular and Molecular Biology                                                 | CSIR-Centre for Cellular and Molecular Biology                                                                          | Sakshi Shambhavi et al           |
| EPI_ISL_447861 | CSIR-Centre for Cellular and Molecular Biology                                                 | CSIR-Centre for Cellular and Molecular Biology                                                                          | Tulasi Nagabandi et al           |
| EPI_ISL_495191 | CSIR-Centre for Cellular and Molecular Biology                                                 | CSIR-Centre for Cellular and Molecular Biology                                                                          | Nikhil Hajirnis et al            |
| EPI_ISL_495266 | CSIR-Centre for Cellular and Molecular Biology                                                 | CSIR-Centre for Cellular and Molecular Biology                                                                          | Namami Gaur et al                |
| EPI_ISL_644719 | Osmania Medical College                                                                        | CSIR-Centre for Cellular and Molecular Biology                                                                          | Dr.V.Sudha Rani et al            |
| EPI_ISL_644726 | Osmania Medical College                                                                        | CSIR-Centre for Cellular and Molecular Biology                                                                          | Dr.V.Sudha Rani et al            |
| EPI_ISL_910310 | CSIR-Centre for Cellular and Molecular Biology                                                 | CSIR-Centre for Cellular and Molecular Biology                                                                          | Payel Mukherjee et al            |
| EPI_ISL_528592 | National Genomics Core-Center for DNA Fingerprinting and Diagnostics                           | National Genomics Core-Center for DNA Fingerprinting and Diagnostics (NGC-CDFD)- DBT's PAN-INDIA-1000 Genome consortium | Heena Shah et al                 |
| EPI_ISL_438139 | Department of Microbiology,Gandhi Medical College and Hospital,Hyderabad                       | Virus Research Laboratory, Department of Zoology, Osmania University, Hyderabad, India                                  | Muttineni Radhakrishna et al     |
| EPI_ISL_426179 | National Influenza Center, Indian Council of Medical Research - National Institute of Virology | Indian Council of Medical Research-National Institute of Virology, Microbial Containment Complex                        | Pragya D. Yadav et al            |

|                |                                                                                                    |                                                                                                                          |                                     |
|----------------|----------------------------------------------------------------------------------------------------|--------------------------------------------------------------------------------------------------------------------------|-------------------------------------|
| EPI_ISL_420555 | National Influenza Center, Indian Council of Medical Research - National Institute of Virology     | Indian Council of Medical Research-National Institute of Virology, Microbial Containment Complex                         | Pragya D. Yadav. Savita Patil et al |
| EPI_ISL_636759 | National Centre for Disease control (NCDC)                                                         | NCDC/CSIR-IGIB                                                                                                           | Maresh S. Dhar1* et al              |
| EPI_ISL_636793 | National Centre for Disease control (NCDC)                                                         | NCDC/CSIR-IGIB                                                                                                           | Maresh S. Dhar1* et al              |
| EPI_ISL_578080 | CSIR-Indian Institute of Chemical Biology, MEDICA Supercpecialty Hospital Kolkata                  | CSIR-Indian Institute of Chemical Biology, MEDICA Supercpecialty Hospital Kolkata                                        | Sujay Krishna Maity et al           |
| EPI_ISL_581495 | CSIR-Indian Institute of Chemical Biology, MEDICA Supercpecialty Hospital Kolkata                  | CSIR-Indian Institute of Chemical Biology, MEDICA Supercpecialty Hospital Kolkata                                        | Sujay Krishna Maity et al           |
| EPI_ISL_581500 | CSIR-Indian Institute of Chemical Biology, MEDICA Supercpecialty Hospital Kolkata                  | CSIR-Indian Institute of Chemical Biology, MEDICA Supercpecialty Hospital Kolkata                                        | Sujay Krishna Maity et al           |
| EPI_ISL_944763 | CSIR-Indian Institute of Chemical Biology, MEDICA Supercpecialty Hospital Kolkata                  | CSIR-Indian Institute of Chemical Biology, MEDICA Supercpecialty Hospital Kolkata                                        | Sujay Krishna Maity et al           |
| EPI_ISL_944783 | CSIR-Indian Institute of Chemical Biology, MEDICA Supercpecialty Hospital Kolkata                  | CSIR-Indian Institute of Chemical Biology, MEDICA Supercpecialty Hospital Kolkata                                        | Sujay Krishna Maity et al           |
| EPI_ISL_508396 | Institute of Post Graduate Medical Education & Research                                            | National Institute of Biomedical Genomics                                                                                | Arindam Maitra et al                |
| EPI_ISL_508407 | Institute of Post Graduate Medical Education & Research                                            | National Institute of Biomedical Genomics                                                                                | Arindam Maitra et al                |
| EPI_ISL_455643 | ICMR-National Institute of Cholera and Enteric Diseases                                            | National Institute of Biomedical Genomics                                                                                | Arindam Maitra et al                |
| EPI_ISL_930840 | Virology, ICAR-National Research Centre on Equines                                                 | Virology, ICAR-National Research Centre on Equines                                                                       | Gulati et al                        |
| EPI_ISL_447902 | Osmania University                                                                                 | Osmania University                                                                                                       | Radhakrishna et al                  |
| EPI_ISL_857395 | S.M.S.Medical College, Jaipur, Rajasthan                                                           | S.M.S.Medical College, Jaipur, Rajasthan                                                                                 | Dr. Bharti Malhotra et al           |
| EPI_ISL_757287 | National Institute of Health Research and Development                                              | National Institute of Health Research and Development                                                                    | Rukminiati et al                    |
| EPI_ISL_747237 | National Institute of Health Research and Development                                              | National Institute of Health Research and Development                                                                    | Subangkit et al                     |
| EPI_ISL_833493 | RS PMI Bogor, Indonesia                                                                            | Biosafety Level-3 Laboratory, Indonesian Institute of Sciences (LIPI)                                                    | Isa Nuryana et al                   |
| EPI_ISL_833506 | RS PMI, Bogor, Indonesia                                                                           | Biosafety Level-3 Laboratory, Indonesian Institute of Sciences (LIPI)                                                    | Isa Nuryana et al                   |
| EPI_ISL_889016 | RS Mitra Husada                                                                                    | Eijkman Institute for Molecular Biology, Ministry of Research and Technology/National Agency for Research and Innovation | Iskandar Adnan et al                |
| EPI_ISL_947320 | RS Sari Asih Ciledug                                                                               | Eijkman Institute for Molecular Biology, Ministry of Research and Technology/National Agency for Research and Innovation | Sukma Oktavianthi et al             |
| EPI_ISL_947325 | RSIA PKU Muhammadiyah                                                                              | Eijkman Institute for Molecular Biology, Ministry of Research and Technology/National Agency for Research and Innovation | Sukma Oktavianthi et al             |
| EPI_ISL_947326 | RS Mitra Keluarga Gading Serpong                                                                   | Eijkman Institute for Molecular Biology, Ministry of Research and Technology/National Agency for Research and Innovation | Willy Agustine et al                |
| EPI_ISL_889003 | RS Mitra Keluarga Gading Serpong                                                                   | Eijkman Institute for Molecular Biology, Ministry of Research and Technology/National Agency for Research and Innovation | Willy Agustine et al                |
| EPI_ISL_947327 | RS Mitra Keluarga Gading Serpong                                                                   | Eijkman Institute for Molecular Biology, Ministry of Research and Technology/National Agency for Research and Innovation | Willy Agustine et al                |
| EPI_ISL_766036 | RS Mitra Keluarga Bintaro                                                                          | Eijkman Institute for Molecular Biology, Ministry of Research and Technology/National Agency for Research and Innovation | Frilasita A Yudhaputri et al        |
| EPI_ISL_888988 | RS Qadr                                                                                            | Eijkman Institute for Molecular Biology, Ministry of Research and Technology/National Agency for Research and Innovation | Frilasita A Yudhaputri et al        |
| EPI_ISL_947284 | RSIA Bunda Sejati                                                                                  | Eijkman Institute for Molecular Biology, Ministry of Research and Technology/National Agency for Research and Innovation | Hidayat Trimarsanto et al           |
| EPI_ISL_707890 | Medical Research Center, Faculty of Medicine, Syarif Hidayatullah State Islamic University Jakarta | Medical Research Center, Faculty of Medicine, Syarif Hidayatullah State Islamic University Jakarta                       | Zeti Harriyati et al                |
| EPI_ISL_933575 | Medical Research Center, Faculty of Medicine, Syarif Hidayatullah State Islamic University Jakarta | Medical Research Center, Faculty of Medicine, Syarif Hidayatullah State Islamic University Jakarta                       | Erike A Suwarsono et al             |
| EPI_ISL_882646 | Medical Research Center, Faculty of Medicine, Syarif Hidayatullah State Islamic University Jakarta | Medical Research Center, Faculty of Medicine, Syarif Hidayatullah State Islamic University Jakarta                       | Chris Adhiyanto et al               |

|                |                                                                                                                          |                                                                                                                                                                                                               |                              |
|----------------|--------------------------------------------------------------------------------------------------------------------------|---------------------------------------------------------------------------------------------------------------------------------------------------------------------------------------------------------------|------------------------------|
| EPI_ISL_882656 | Medical Research Center, Faculty of Medicine, Syarif Hidayatullah State Islamic University Jakarta                       | Medical Research Center, Faculty of Medicine, Syarif Hidayatullah State Islamic University Jakarta                                                                                                            | Erike A Suwarsono et al      |
| EPI_ISL_883957 | Medical Research Center, Faculty of Medicine, Syarif Hidayatullah State Islamic University Jakarta                       | Medical Research Center, Faculty of Medicine, Syarif Hidayatullah State Islamic University Jakarta                                                                                                            | Erike A Suwarsono et al      |
| EPI_ISL_560991 | RSUD Dr. Soetomo                                                                                                         | Institute of Tropical Disease, Universitas Airlangga                                                                                                                                                          | Rima R Prasetya et al        |
| EPI_ISL_529138 | RSAL Dr. Ramelan Surabaya                                                                                                | Institute of Tropical Disease, Universitas Airlangga                                                                                                                                                          | Jezy R Dewantari et al       |
| EPI_ISL_889018 | RSU Medika Dramaga                                                                                                       | Eijkman Institute for Molecular Biology, Ministry of Research and Technology/National Agency for Research and Innovation                                                                                      | Lydia V. Panggalo et al      |
| EPI_ISL_888997 | RSU Asyasyifaa                                                                                                           | Eijkman Institute for Molecular Biology, Ministry of Research and Technology/National Agency for Research and Innovation                                                                                      | Sukma Oktavianthi et al      |
| EPI_ISL_889005 | Eijkman Institute for Molecular Biology, Ministry of Research and Technology/National Agency for Research and Innovation | Eijkman Institute for Molecular Biology, Ministry of Research and Technology/National Agency for Research and Innovation                                                                                      | Willy Agustine et al         |
| EPI_ISL_574606 | RS Siloam Purwakarta                                                                                                     | Eijkman Institute for Molecular Biology, Ministry of Research and Technology/National Agency for Research and Innovation                                                                                      | Frilasita A Yudhaputri et al |
| EPI_ISL_889008 | RS Sentra Medika Cibinong                                                                                                | Eijkman Institute for Molecular Biology, Ministry of Research and Technology/National Agency for Research and Innovation                                                                                      | Edison Johar et al           |
| EPI_ISL_889020 | RS Omni Cikarang                                                                                                         | Eijkman Institute for Molecular Biology, Ministry of Research and Technology/National Agency for Research and Innovation                                                                                      | Edison Johar et al           |
| EPI_ISL_947249 | RS Bina Husada Cibinong                                                                                                  | Eijkman Institute for Molecular Biology, Ministry of Research and Technology/National Agency for Research and Innovation                                                                                      | Edison Johar et al           |
| EPI_ISL_947252 | RS Bina Husada Cibinong                                                                                                  | Eijkman Institute for Molecular Biology, Ministry of Research and Technology/National Agency for Research and Innovation                                                                                      | Edison Johar et al           |
| EPI_ISL_947255 | RSU Meilia                                                                                                               | Eijkman Institute for Molecular Biology, Ministry of Research and Technology/National Agency for Research and Innovation                                                                                      | Edison Johar et al           |
| EPI_ISL_888986 | RSU Bhakti Kartini                                                                                                       | Eijkman Institute for Molecular Biology, Ministry of Research and Technology/National Agency for Research and Innovation                                                                                      | Edison Johar et al           |
| EPI_ISL_889021 | RSIA Kenari Graha Medika                                                                                                 | Eijkman Institute for Molecular Biology, Ministry of Research and Technology/National Agency for Research and Innovation                                                                                      | Hidayat Trimarsanto et al    |
| EPI_ISL_889022 | RS Anna                                                                                                                  | Eijkman Institute for Molecular Biology, Ministry of Research and Technology/National Agency for Research and Innovation                                                                                      | Hidayat Trimarsanto et al    |
| EPI_ISL_947298 | RSU Medirosa                                                                                                             | Eijkman Institute for Molecular Biology, Ministry of Research and Technology/National Agency for Research and Innovation                                                                                      | Iskandar Adnan et al         |
| EPI_ISL_528748 | Dinkes Provinsi Jawa Barat                                                                                               | School of Life Sciences and Technology & School of Pharmacy-Institut Teknologi Bandung; Molecular Genetics Laboratory-Faculty of Medicine-Universitas Padjadjaran; Laboratorium Kesehatan Provinsi Jawa Barat | Azzania Fibriani et al       |
| EPI_ISL_529718 | Santo Borromeus Hospital                                                                                                 | School of Life Sciences and Technology & School of Pharmacy-Institut Teknologi Bandung; Molecular Genetics Laboratory-Faculty of Medicine-Universitas Padjadjaran                                             | Emah Rahmawati et al         |
| EPI_ISL_528759 | Santo Borromeus Hospital                                                                                                 | School of Life Sciences and Technology & School of Pharmacy-Institut Teknologi Bandung; Molecular Genetics Laboratory-Faculty of Medicine-Universitas Padjadjaran; Laboratorium Kesehatan Provinsi Jawa Barat | Husna Nugrahapraja et al     |
| EPI_ISL_528753 | Dinkes Kota Bogor                                                                                                        | Kesehatan Provinsi Jawa Barat                                                                                                                                                                                 | Azzania Fibriani et al       |
| EPI_ISL_747238 | Bogor Public Health                                                                                                      | West Java Health Laboratory; School of Life Sciences and Technology, Institut Teknologi Bandung                                                                                                               | Azzania Fibriani et al       |
| EPI_ISL_529967 | RSUD Sidoarjo                                                                                                            | Institute of Tropical Disease, Universitas Airlangga                                                                                                                                                          | Aldise M NASTRI et al        |
| EPI_ISL_529961 | Husada Utama Hospital                                                                                                    | Institute of Tropical Disease, Universitas Airlangga                                                                                                                                                          | Krisnodi Rahardjo et al      |
| EPI_ISL_529962 | Universitas Airlangga Hospital                                                                                           | Institute of Tropical Disease, Universitas Airlangga                                                                                                                                                          | Jezy R Dewantari et al       |
| EPI_ISL_458083 | Adi Husada Undaan Hospital                                                                                               | Institute of Tropical Disease, Universitas Airlangga                                                                                                                                                          | Rima R Prasetya et al        |

|                |                                                       |                                                                                                                          |                              |
|----------------|-------------------------------------------------------|--------------------------------------------------------------------------------------------------------------------------|------------------------------|
| EPI_ISL_529966 | RSUD Sidoarjo                                         | Institute of Tropical Disease, Universitas Airlangga                                                                     | Kazufumi Shimizu et al       |
| EPI_ISL_956276 | Mitra Keluarga Hospital Waru                          | Institute of Tropical Disease, Universitas Airlangga                                                                     | Maria I Lusida et al         |
| EPI_ISL_956310 | RSUD Dr. M. Soewandhie                                | Institute of Tropical Disease, Universitas Airlangga                                                                     | Aldise M Natri et al         |
| EPI_ISL_956277 | Paru Hospital                                         | Institute of Tropical Disease, Universitas Airlangga                                                                     | Krisnodi Rahardjo et al      |
| EPI_ISL_956278 | Siti Khodijah Hospital                                | Institute of Tropical Disease, Universitas Airlangga                                                                     | Aldise M Natri et al         |
| EPI_ISL_877456 | Primasatya Husada Citra Hospital                      | Institute of Tropical Disease, Universitas Airlangga                                                                     | Krisnodi Rahardjo et al      |
| EPI_ISL_882769 | Institute of Tropical Disease                         | Institute of Tropical Disease, Universitas Airlangga                                                                     | Kazufumi Shimizu et al       |
| EPI_ISL_877459 | Darmo Hospital                                        | Institute of Tropical Disease, Universitas Airlangga                                                                     | Rima R Prasetya et al        |
| EPI_ISL_759955 | Primasatya Husada Citra Hospital                      | Institute of Tropical Disease, Universitas Airlangga                                                                     | Aldise M Natri et al         |
| EPI_ISL_759956 | Husada Utama Hospital                                 | Institute of Tropical Disease, Universitas Airlangga                                                                     | Jezy R Dewantari et al       |
| EPI_ISL_759957 | Siti Khodijah Hospital                                | Institute of Tropical Disease, Universitas Airlangga                                                                     | Rima R Prasetya et al        |
| EPI_ISL_956270 | Universitas Airlangga Hospital                        | Institute of Tropical Disease, Universitas Airlangga                                                                     | Aldise M Natri et al         |
| EPI_ISL_759966 | RSUD Sidoarjo                                         | Institute of Tropical Disease, Universitas Airlangga                                                                     | Krisnodi Rahardjo et al      |
| EPI_ISL_538498 | RSUD Soediono Madiun East Java                        | National Institute of Health Research and Development                                                                    | Pawestri et al               |
| EPI_ISL_538499 | RS Lavallete Malang East Java                         | National Institute of Health Research and Development                                                                    | Pawestri et al               |
| EPI_ISL_538511 | RSUD Wahidin Sudirohusodo Mojokerto East Java         | National Institute of Health Research and Development                                                                    | Pawestri et al               |
| EPI_ISL_437190 | RS Pondok Indah Hospital – Pondok Indah               | Eijkman Institute for Molecular Biology, Ministry of Research and Technology/National Agency for Research and Innovation | Edison Johar et al           |
| EPI_ISL_437191 | RS Pondok Indah Hospital – Pondok Indah               | Eijkman Institute for Molecular Biology, Ministry of Research and Technology/National Agency for Research and Innovation | Edison Johar et al           |
| EPI_ISL_467376 | RSUP Fatmawati                                        | Eijkman Institute for Molecular Biology, Ministry of Research and Technology/National Agency for Research and Innovation | Edison Johar et al           |
| EPI_ISL_568690 | RSUP Fatmawati                                        | Eijkman Institute for Molecular Biology, Ministry of Research and Technology/National Agency for Research and Innovation | Frilasita A Yudhaputri et al |
| EPI_ISL_574609 | RSJPD Harapan Kita                                    | Eijkman Institute for Molecular Biology, Ministry of Research and Technology/National Agency for Research and Innovation | Frilasita A Yudhaputri et al |
| EPI_ISL_766040 | RS Tingkat II Moh. Ridwan Meuraksa                    | Eijkman Institute for Molecular Biology, Ministry of Research and Technology/National Agency for Research and Innovation | Frilasita A Yudhaputri et al |
| EPI_ISL_766041 | RS Polri                                              | Eijkman Institute for Molecular Biology, Ministry of Research and Technology/National Agency for Research and Innovation | Frilasita A Yudhaputri et al |
| EPI_ISL_766044 | RSUP Fatmawati                                        | Eijkman Institute for Molecular Biology, Ministry of Research and Technology/National Agency for Research and Innovation | Frilasita A Yudhaputri et al |
| EPI_ISL_574614 | RS Kramat 128                                         | Eijkman Institute for Molecular Biology, Ministry of Research and Technology/National Agency for Research and Innovation | Frilasita A Yudhaputri et al |
| EPI_ISL_833495 | Klinik Apotek Dein, Jakarta, Indonesia                | Biosafety Level-3 Laboratory, Indonesian Institute of Sciences (LIPI)                                                    | Ade Andriani et al           |
| EPI_ISL_833498 | Kartika Pulomas Hospital, Jakarta, Indonesia          | Biosafety Level-3 Laboratory, Indonesian Institute of Sciences (LIPI)                                                    | Anggia Prasetyoputri et al   |
| EPI_ISL_942971 | National Institute of Health Research and Development | National Institute of Health Research and Development                                                                    | Subangkit et al              |
| EPI_ISL_833130 | National Institute of Health Research and Development | National Institute of Health Research and Development                                                                    | Agustiningsih et al          |
| EPI_ISL_574433 | National Institute of Health Research and Development | National Institute of Health Research and Development                                                                    | Pawestri et al               |
| EPI_ISL_747233 | National Institute of Health Research and Development | National Institute of Health Research and Development                                                                    | Subangkit et al              |
| EPI_ISL_538509 | National Institute of Health Research and Development | National Institute of Health Research and Development                                                                    | Pawestri et al               |
| EPI_ISL_576387 | National Institute of Health Research and Development | National Institute of Health Research and Development                                                                    | Pawestri et al               |
| EPI_ISL_984276 | National Institute of Health Research and Development | National Institute of Health Research and Development                                                                    | Holy Arif Wibowo et al       |

|                |                                                      |                                                                                                                                                                                                                                                                                                                                                                                                                                                                                                                                                                                                                          |                              |
|----------------|------------------------------------------------------|--------------------------------------------------------------------------------------------------------------------------------------------------------------------------------------------------------------------------------------------------------------------------------------------------------------------------------------------------------------------------------------------------------------------------------------------------------------------------------------------------------------------------------------------------------------------------------------------------------------------------|------------------------------|
| EPI_ISL_568686 | RSUD Prof. DR. Margono Soekarjo                      | Eijkman Institute for Molecular Biology, Ministry of Research and Technology/National Agency for Research and Innovation<br>Public Health and Nursing Universitas Gadjah Mada (FK-KMK UGM); Disease Investigation Center Wates Ministry of Agriculture Indonesia; Department of Microbiology FK-KMK UGM; Laboratorium Diagnostik Yayasan Tahija World Mosquito Program (WMP) Yogyakarta Center for Tropical Medicine FK-KMK UGM; Integrated Research Center FK-KMK UGM; Department of Computer Science and Electronics FMIPA UGM; Balai Besar Teknik Kesehatan Lingkungan dan Pengendalian Penyakit (BBTKLPP) Yogyakarta | Frilasita A Yudhaputri et al |
| EPI_ISL_610162 | RSUD Dr. Tjitrowardojo                               | Universitas Sebelas Maret (UNS); Rumah Sakit UNS (RS-UNS); National Institute of Health Research and Development, Indonesian Ministry of Health                                                                                                                                                                                                                                                                                                                                                                                                                                                                          | Gunadi et al                 |
| EPI_ISL_763063 | RS Panti Waluyo, Surakarta                           | Universitas Sebelas Maret (UNS); Rumah Sakit Universitas Sebelas Maret (RS-UNS), Surakarta; National Institute of Health Research and Development, Indonesian Ministry of Health , Jakarta).                                                                                                                                                                                                                                                                                                                                                                                                                             | Betty Suryawati et al        |
| EPI_ISL_759705 | RSUD Bung Karno, Surakarta                           | Universitas Sebelas Maret (UNS), Rumah sakit Universitas Sebelas Maret (RS-UNS) Surakarta, National Institute of Health Research and Development, Indonesian Ministry of Health                                                                                                                                                                                                                                                                                                                                                                                                                                          | Betty Suryawati et al        |
| EPI_ISL_759702 | RS UNS Surakarta                                     | Universitas Sebelas Maret (UNS); Rumah Sakit UNS (RS-UNS); National Institute of Health Research and Development, Indonesian Ministry of Health.                                                                                                                                                                                                                                                                                                                                                                                                                                                                         | Betty Suryawati et al        |
| EPI_ISL_763064 | RS Kasih Ibu, Surakarta                              | National Institute of Health Research and Development                                                                                                                                                                                                                                                                                                                                                                                                                                                                                                                                                                    | Betty Suryawati et al        |
| EPI_ISL_833040 | RSUD Dr. Abdul Aziz Singkawang                       | Tanjungpura University Hospital                                                                                                                                                                                                                                                                                                                                                                                                                                                                                                                                                                                          | Subangkit et al              |
| EPI_ISL_902921 | Tanjungpura University Hospital                      | Tanjungpura University Hospital                                                                                                                                                                                                                                                                                                                                                                                                                                                                                                                                                                                          | Puji Astuti et al            |
| EPI_ISL_911633 | Tanjungpura University Hospital                      | Tanjungpura University Hospital                                                                                                                                                                                                                                                                                                                                                                                                                                                                                                                                                                                          | Mahyarudin et al             |
| EPI_ISL_467374 | Dinkes Samarinda                                     | Eijkman Institute for Molecular Biology, Ministry of Research and Technology/National Agency for Research and Innovation                                                                                                                                                                                                                                                                                                                                                                                                                                                                                                 | Edison Johar et al           |
| EPI_ISL_791983 | RSUD dr. Kanujoso Djatiwibowo Balikpapan             | National Institute of Health Research and Development                                                                                                                                                                                                                                                                                                                                                                                                                                                                                                                                                                    | Subangkit et al              |
| EPI_ISL_576385 | Tirta Medical Center Angsana, Banjarmasin Kalsel     | National Institute of Health Research and Development                                                                                                                                                                                                                                                                                                                                                                                                                                                                                                                                                                    | Pawestri et al               |
| EPI_ISL_538510 | RSUD Ulin Banjarmasin South Kalimantan               | National Institute of Health Research and Development                                                                                                                                                                                                                                                                                                                                                                                                                                                                                                                                                                    | Pawestri et al               |
| EPI_ISL_753699 | RSUD Ulin Banjarmasin Kalimantan Selatan             | National Institute of Health Research and Development                                                                                                                                                                                                                                                                                                                                                                                                                                                                                                                                                                    | Subangkit et al              |
| EPI_ISL_538502 | RSUD Sultan Imanudin Pangkalan Bun Center Kalimantan | National Institute of Health Research and Development                                                                                                                                                                                                                                                                                                                                                                                                                                                                                                                                                                    | Pawestri et al               |
| EPI_ISL_803876 | RSUD Tarakan Kalimantan Utara                        | National Institute of Health Research and Development                                                                                                                                                                                                                                                                                                                                                                                                                                                                                                                                                                    | Subangkit et al              |
| EPI_ISL_791978 | Balai Labkes Lampung                                 | National Institute of Health Research and Development                                                                                                                                                                                                                                                                                                                                                                                                                                                                                                                                                                    | Nugraha et al                |
| EPI_ISL_775598 | RSUD Kota Mataram                                    | National Institute of Health Research and Development                                                                                                                                                                                                                                                                                                                                                                                                                                                                                                                                                                    | Puspa et al                  |
| EPI_ISL_568693 | RS Freeport Tembagapura                              | Eijkman Institute for Molecular Biology, Ministry of Research and Technology/National Agency for Research and Innovation                                                                                                                                                                                                                                                                                                                                                                                                                                                                                                 | Frilasita A Yudhaputri et al |
| EPI_ISL_574620 | BTKLPP Kelas I Manado                                | Eijkman Institute for Molecular Biology, Ministry of Research and Technology/National Agency for Research and Innovation                                                                                                                                                                                                                                                                                                                                                                                                                                                                                                 | Hidayat Trimarsanto et al    |
| EPI_ISL_574621 | BTKLPP Kelas I Manado                                | Eijkman Institute for Molecular Biology, Ministry of Research and Technology/National Agency for Research and Innovation                                                                                                                                                                                                                                                                                                                                                                                                                                                                                                 | Hidayat Trimarsanto et al    |
| EPI_ISL_574622 | BTKLPP Kelas I Manado                                | Eijkman Institute for Molecular Biology, Ministry of Research and Technology/National Agency for Research and Innovation                                                                                                                                                                                                                                                                                                                                                                                                                                                                                                 | Hidayat Trimarsanto et al    |
| EPI_ISL_574623 | BTKLPP Kelas I Manado                                | Eijkman Institute for Molecular Biology, Ministry of Research and Technology/National Agency for Research and Innovation                                                                                                                                                                                                                                                                                                                                                                                                                                                                                                 | Hidayat Trimarsanto et al    |
| EPI_ISL_833039 | RS TK II 02.05.01 dr. AK Gani Palembang              | National Institute of Health Research and Development                                                                                                                                                                                                                                                                                                                                                                                                                                                                                                                                                                    | Subangkit et al              |
| EPI_ISL_538500 | RS Prima Husada Cipta Medan North Sumatra            | National Institute of Health Research and Development                                                                                                                                                                                                                                                                                                                                                                                                                                                                                                                                                                    | Pawestri et al               |
| EPI_ISL_538501 | RS Prima Husada Cipta Medan North Sumatra            | National Institute of Health Research and Development                                                                                                                                                                                                                                                                                                                                                                                                                                                                                                                                                                    | Pawestri et al               |

|                |                                                                                                                                                    |                                                                                                                                                                                                                                                                                                                                                                                                                                                                                                                                   |                              |
|----------------|----------------------------------------------------------------------------------------------------------------------------------------------------|-----------------------------------------------------------------------------------------------------------------------------------------------------------------------------------------------------------------------------------------------------------------------------------------------------------------------------------------------------------------------------------------------------------------------------------------------------------------------------------------------------------------------------------|------------------------------|
| EPI_ISL_766032 | RSUP Dr. Sardjito                                                                                                                                  | Eijkman Institute for Molecular Biology, Ministry of Research and Technology/National Agency for Research and Innovation, Genetics Working Group (Pojka Genetik) Faculty of Medicine, Public Health and Nursing Universitas Gadjah Mada (FK-KMK UGM); Disease Investigation Center Wates Ministry of Agriculture Indonesia; Department of Microbiology FK-KMK UGM; Laboratorium Diagnostik Yayasan Tahija World Mosquito Program (WMP) Yogyakarta Center for Tropical Medicine FK-KMK UGM; Integrated Research Center FK-KMK UGM; | Frilasita A Yudhaputri et al |
| EPI_ISL_576130 | RSUP Dr. Sardjito                                                                                                                                  | Department of Computer Science and Electronics FMIPA UGM Public Health and Nursing Universitas Gadjah Mada (FK-KMK UGM); Disease Investigation Center Wates Ministry of Agriculture Indonesia; Department of Microbiology FK-KMK UGM; Laboratorium Diagnostik Yayasan Tahija World Mosquito Program (WMP) Yogyakarta Center for Tropical Medicine FK-KMK UGM; Integrated Research Center FK-KMK UGM;                                                                                                                              | Gunadi et al                 |
| EPI_ISL_632937 | RSUD Saptosari Gunung Kidul                                                                                                                        | Balai Besar Teknik Kesehatan Lingkungan dan Pengendalian Penyakit (BBTKLPP) Yogyakarta                                                                                                                                                                                                                                                                                                                                                                                                                                            | Gunadi et al                 |
| EPI_ISL_594186 | Department of Pathology, School of Medicine, Imam Khomeini Hospital, Tehran University of Medical Sciences                                         | Genetics Research Center, University of Social Welfare and Rehabilitation Sciences                                                                                                                                                                                                                                                                                                                                                                                                                                                | Zohreh Fattahi et al         |
| EPI_ISL_582033 | Department of Pathology, School of Medicine, Imam Khomeini Hospital, Tehran University of Medical Sciences                                         | Genetics Research Center. University Of Social Welfare And Rehabilitation Sciences                                                                                                                                                                                                                                                                                                                                                                                                                                                | Zohreh Fattahi et al         |
| EPI_ISL_594187 | Department of Pathology, School of Medicine, Imam Khomeini Hospital, Tehran University of Medical Sciences                                         | Genetics Research Center, University of Social Welfare and Rehabilitation Sciences                                                                                                                                                                                                                                                                                                                                                                                                                                                | Zohreh Fattahi et al         |
| EPI_ISL_594185 | Department of Pathology, School of Medicine, Imam Khomeini Hospital, Tehran University of Medical Sciences                                         | Genetics Research Center, University of Social Welfare and Rehabilitation Sciences                                                                                                                                                                                                                                                                                                                                                                                                                                                | Zohreh Fattahi et al         |
| EPI_ISL_847827 | COVID-19 National Reference Laboratory                                                                                                             | COVID-19 National Reference Laboratory                                                                                                                                                                                                                                                                                                                                                                                                                                                                                            | Tahmineh Jalali et al        |
| EPI_ISL_594188 | Department of Pathology, School of Medicine, Imam Khomeini Hospital, Tehran University of Medical Sciences                                         | Genetics Research Center, University of Social Welfare and Rehabilitation Sciences                                                                                                                                                                                                                                                                                                                                                                                                                                                | Zohreh Fattahi et al         |
| EPI_ISL_625683 | National Reference Laboratory for COVID-19, Pasteur Institute of Iran                                                                              | National Reference Laboratory for COVID-19, Pasteur Institute of Iran                                                                                                                                                                                                                                                                                                                                                                                                                                                             | Zahra Ahmadi et al           |
| EPI_ISL_815256 | Centogene                                                                                                                                          | Centogene                                                                                                                                                                                                                                                                                                                                                                                                                                                                                                                         | Peter Bauer et al            |
| EPI_ISL_596451 | Department of Pathology, School of Medicine, Imam Khomeini Hospital, Tehran University of Medical Sciences                                         | Genetics Research Center, University of Social Welfare and Rehabilitation Sciences                                                                                                                                                                                                                                                                                                                                                                                                                                                | Zohreh Fattahi et al         |
| EPI_ISL_596453 | Booali laboratory, Qom, Iran. Department of Virology, School of Public Health, Tehran University of Medical Sciences, Tehran, Iran.                | Genetics Research Center, University of Social Welfare and Rehabilitation Sciences                                                                                                                                                                                                                                                                                                                                                                                                                                                | Zohreh Fattahi et al         |
| EPI_ISL_596454 | Infectious Disease and Tropical Medicine Research Center, Resistant Tuberculosis Institute, Zahedan University of Medical Sciences, Zahedan, Iran. | Genetics Research Center, University of Social Welfare and Rehabilitation Sciences                                                                                                                                                                                                                                                                                                                                                                                                                                                | Zohreh Fattahi et al         |
| EPI_ISL_596452 | Department of Pathology, School of Medicine, Imam Khomeini Hospital, Tehran University of Medical Sciences                                         | Genetics Research Center, University of Social Welfare and Rehabilitation Sciences                                                                                                                                                                                                                                                                                                                                                                                                                                                | Zohreh Fattahi et al         |
| EPI_ISL_596455 | Department of Pathology, School of Medicine, Imam Khomeini Hospital, Tehran University of Medical Sciences                                         | Genetics Research Center, University of Social Welfare and Rehabilitation Sciences                                                                                                                                                                                                                                                                                                                                                                                                                                                | Zohreh Fattahi et al         |
| EPI_ISL_959278 | National Influenza Center, Virology Department                                                                                                     | National Influenza Center                                                                                                                                                                                                                                                                                                                                                                                                                                                                                                         | A Nejadi et al               |
| EPI_ISL_959282 | National Influenza Center, Virology Department                                                                                                     | National Influenza Center                                                                                                                                                                                                                                                                                                                                                                                                                                                                                                         | J Yavarian et al             |
| EPI_ISL_959277 | National Influenza Center, Virology Department                                                                                                     | National Influenza Center                                                                                                                                                                                                                                                                                                                                                                                                                                                                                                         | J Yavarian et al             |
| EPI_ISL_959281 | National Influenza Center, Virology Department                                                                                                     | National Influenza Center                                                                                                                                                                                                                                                                                                                                                                                                                                                                                                         | NZ Shafiei Jandaghi et al    |
| EPI_ISL_959280 | National Influenza Center, Virology Department                                                                                                     | National Influenza Center                                                                                                                                                                                                                                                                                                                                                                                                                                                                                                         | J Yavarian et al             |
| EPI_ISL_959276 | National Influenza Center, Virology Department                                                                                                     | National Influenza Center                                                                                                                                                                                                                                                                                                                                                                                                                                                                                                         | NZ Shafiei Jandaghi et al    |
| EPI_ISL_959283 | National Influenza Center, Virology Department                                                                                                     | National Influenza Center                                                                                                                                                                                                                                                                                                                                                                                                                                                                                                         | NZ Shafiei Jandaghi et al    |



|                |                                                                                                  |                                                                                                   |                             |
|----------------|--------------------------------------------------------------------------------------------------|---------------------------------------------------------------------------------------------------|-----------------------------|
| EPI_ISL_959275 | National Influenza Center, Virology Department                                                   | National Influenza Center                                                                         | V Salimi et al              |
| EPI_ISL_442523 | Pasteur Institute of Iran                                                                        | Kawsar Human Genetic Research Company                                                             | Sirous Zeinali et al        |
| EPI_ISL_442044 | Kawsar Human Genetic Research Center                                                             | Kawsar Human Genetic Research Center                                                              | Mohammad Ali Khosravi et al |
| EPI_ISL_445088 | Human Genetic Research Center, Kawsar Biotech Company                                            | Human Genetic Research Center, Kawsar Biotech Company                                             | Abbasalipour Bashash et al  |
| EPI_ISL_833578 | National Reference Laboratory for COVID-19, Pasteur Institute of Iran                            | National Reference Laboratory for COVID-19, Pasteur Institute of Iran                             | Zahra Ahmadi et al          |
| EPI_ISL_463749 | Pasteur Institute of Iran                                                                        | Rapid Response Team                                                                               | Mahboobeh Rafigh et al      |
| EPI_ISL_637099 | Indian Council of Medical Research-National Institute of Virology, Microbial Containment Complex | Indian Council of Medical Research-National Institute of Virology, Microbial Containment Complex  | Pragya D. Yadav et al       |
| EPI_ISL_637102 | Indian Council of Medical Research-National Institute of Virology, Microbial Containment Complex | Indian Council of Medical Research-National Institute of Virology, Microbial Containment Complex  | Pragya D. Yadav et al       |
| EPI_ISL_862081 | National Influenza Center, Virology Department                                                   | National Influenza Center                                                                         | NZ Shafiei Jandaghi et al   |
| EPI_ISL_862076 | National Influenza Center, Virology Department                                                   | National Influenza Center                                                                         | NZ Shafiei Jandaghi et al   |
| EPI_ISL_862080 | National Influenza Center, Virology Department                                                   | National Influenza Center                                                                         | J Yavarian et al            |
| EPI_ISL_862079 | National Influenza Center, Virology Department                                                   | National Influenza Center                                                                         | K Sadeghi et al             |
| EPI_ISL_862075 | National Influenza Center, Virology Department                                                   | National Influenza Center                                                                         | V Salimi et al              |
| EPI_ISL_862078 | National Influenza Center, Virology Department                                                   | National Influenza Center                                                                         | A Nejadi et al              |
| EPI_ISL_862077 | National Influenza Center, Virology Department                                                   | National Influenza Center                                                                         | J Yavarian et al            |
| EPI_ISL_959284 | National Influenza Center, Virology Department                                                   | National Influenza Center                                                                         | V Salimi et al              |
| EPI_ISL_959279 | National Influenza Center, Virology Department                                                   | National Influenza Center                                                                         | K Sadeghi et al             |
| EPI_ISL_956332 | Department of Biology, University of Basrah                                                      | Department of Biology, University of Basrah                                                       | Abu-Ali et al               |
| EPI_ISL_907075 | Department of Biology, University of Basrah                                                      | Department of Biology, University of Basrah                                                       | Abu-Ali et al               |
| EPI_ISL_582030 | Biology Department, College of Science, Al-Muthanna University                                   | International Centre for Genetic Engineering and Biotechnology (ICGEB) and ARGO Open Lab Platform | Nihad Al-Rashedi et al      |
| EPI_ISL_885143 | Central public health laboratory                                                                 | Molecular Diagnostics Department, Central public health laboratory                                | Dler et al                  |
| EPI_ISL_812259 | Landstuhl Regional Medical Center                                                                | United States Air Force School of Aerospace Medicine                                              | Anthony Fries et al         |
| EPI_ISL_812260 | Landstuhl Regional Medical Center                                                                | United States Air Force School of Aerospace Medicine                                              | Anthony Fries et al         |
| EPI_ISL_812261 | Landstuhl Regional Medical Center                                                                | United States Air Force School of Aerospace Medicine                                              | Anthony Fries et al         |
| EPI_ISL_812262 | Landstuhl Regional Medical Center                                                                | United States Air Force School of Aerospace Medicine                                              | Anthony Fries et al         |
| EPI_ISL_812265 | Landstuhl Regional Medical Center                                                                | United States Air Force School of Aerospace Medicine                                              | Anthony Fries et al         |
| EPI_ISL_812266 | Landstuhl Regional Medical Center                                                                | United States Air Force School of Aerospace Medicine                                              | Anthony Fries et al         |
| EPI_ISL_812268 | Landstuhl Regional Medical Center                                                                | United States Air Force School of Aerospace Medicine                                              | Anthony Fries et al         |
| EPI_ISL_812269 | Landstuhl Regional Medical Center                                                                | United States Air Force School of Aerospace Medicine                                              | Anthony Fries et al         |
| EPI_ISL_812270 | Landstuhl Regional Medical Center                                                                | United States Air Force School of Aerospace Medicine                                              | Anthony Fries et al         |
| EPI_ISL_812277 | Landstuhl Regional Medical Center                                                                | United States Air Force School of Aerospace Medicine                                              | Anthony Fries et al         |
| EPI_ISL_812278 | Landstuhl Regional Medical Center                                                                | United States Air Force School of Aerospace Medicine                                              | Anthony Fries et al         |
| EPI_ISL_812281 | Landstuhl Regional Medical Center                                                                | United States Air Force School of Aerospace Medicine                                              | Anthony Fries et al         |
| EPI_ISL_959706 | National Virus Reference Laboratory                                                              | National Virus Reference Laboratory                                                               | Michael Carr et al          |
| EPI_ISL_525371 | National Virus Reference Laboratory                                                              | National Virus Reference Laboratory                                                               | Michael Carr et al          |
| EPI_ISL_681908 | National Virus Reference Laboratory                                                              | Irish Coronavirus Sequencing Consortium - Teagasc Moorepark                                       | Paul Cotter et al           |
| EPI_ISL_671866 | National Virus Reference Laboratory                                                              | National Virus Reference Laboratory                                                               | Michael Carr et al          |



|                 |                                     |                                                                                 |                        |
|-----------------|-------------------------------------|---------------------------------------------------------------------------------|------------------------|
| EPI_ISL_909858  | National Virus Reference Laboratory | National Virus Reference Laboratory                                             | Michael Carr et al     |
| EPI_ISL_875351  | National Virus Reference Laboratory | National Virus Reference Laboratory                                             | Michael Carr et al     |
| EPI_ISL_1001260 | National Virus Reference Laboratory | National Virus Reference Laboratory                                             | Michael Carr et al     |
| EPI_ISL_644252  | CEPHR / Mater Hospital              | Irish Coronavirus Sequencing Consortium - National Virus Reference Laboratory   | Michael Carr et al     |
| EPI_ISL_644253  | CEPHR / Mater Hospital              | Irish Coronavirus Sequencing Consortium - National Virus Reference Laboratory   | Michael Carr et al     |
| EPI_ISL_644321  | CEPHR / Vincent's Hospital          | Irish Coronavirus Sequencing Consortium - National Virus Reference Laboratory   | Michael Carr et al     |
| EPI_ISL_644273  | CEPHR / Vincent's Hospital          | Irish Coronavirus Sequencing Consortium - National Virus Reference Laboratory   | Michael Carr et al     |
| EPI_ISL_644310  | CEPHR / Vincent's Hospital          | Irish Coronavirus Sequencing Consortium - National Virus Reference Laboratory   | Michael Carr et al     |
| EPI_ISL_768762  | AIID                                | Irish Coronavirus Sequencing Consortium - National Virus Reference Laboratory   | Michael Carr et al     |
| EPI_ISL_768775  | AIID                                | Irish Coronavirus Sequencing Consortium - National Virus Reference Laboratory   | Michael Carr et al     |
| EPI_ISL_768755  | AIID                                | Irish Coronavirus Sequencing Consortium - National Virus Reference Laboratory   | Michael Carr et al     |
| EPI_ISL_768778  | AIID                                | Irish Coronavirus Sequencing Consortium - National Virus Reference Laboratory   | Michael Carr et al     |
| EPI_ISL_768779  | AIID                                | Irish Coronavirus Sequencing Consortium - National Virus Reference Laboratory   | Michael Carr et al     |
| EPI_ISL_767768  | National Virus Reference Laboratory | Irish Coronavirus Sequencing Consortium - Teagasc Moorepark                     | Calum Walsh et al      |
| EPI_ISL_767717  | National Virus Reference Laboratory | Irish Coronavirus Sequencing Consortium - Teagasc Moorepark                     | Calum Walsh et al      |
| EPI_ISL_767762  | National Virus Reference Laboratory | Irish Coronavirus Sequencing Consortium - Teagasc Moorepark                     | Calum Walsh et al      |
| EPI_ISL_767778  | National Virus Reference Laboratory | Irish Coronavirus Sequencing Consortium - Teagasc Moorepark                     | Calum Walsh et al      |
| EPI_ISL_767774  | National Virus Reference Laboratory | Irish Coronavirus Sequencing Consortium - Teagasc Moorepark                     | Calum Walsh et al      |
| EPI_ISL_666699  | National Virus Reference Lab (NVRL) | Irish Coronavirus Sequencing Consortium-Teagasc Grange                          | Matthew McCabe et al   |
| EPI_ISL_1001193 | National Virus Reference Laboratory | National Virus Reference Laboratory                                             | Michael Carr et al     |
| EPI_ISL_1001134 | National Virus Reference Laboratory | National Virus Reference Laboratory                                             | Michael Carr et al     |
| EPI_ISL_1001122 | National Virus Reference Laboratory | National Virus Reference Laboratory                                             | Michael Carr et al     |
| EPI_ISL_578277  | National Virus Reference Laboratory | National Virus Reference Laboratory                                             | Michael Carr et al     |
| EPI_ISL_671903  | National Virus Reference Laboratory | National Virus Reference Laboratory                                             | Michael Carr et al     |
| EPI_ISL_752566  | National Virus Reference Laboratory | National Virus Reference Laboratory                                             | Michael Carr et al     |
| EPI_ISL_1001221 | National Virus Reference Laboratory | National Virus Reference Laboratory                                             | Michael Carr et al     |
| EPI_ISL_848159  | National Virus Reference Laboratory | Irish Coronavirus Sequencing Consortium - National University of Ireland Galway | Kate Reddington et al  |
| EPI_ISL_981259  | National Virus Reference Laboratory | Irish Coronavirus Sequencing Consortium - Helixworks                            | Sachin Chalapati et al |
| EPI_ISL_512090  | National Virus Reference Laboratory | National Virus Reference Laboratory                                             | Michael Carr et al     |
| EPI_ISL_512091  | National Virus Reference Laboratory | National Virus Reference Laboratory                                             | Michael Carr et al     |
| EPI_ISL_512097  | National Virus Reference Laboratory | National Virus Reference Laboratory                                             | Michael Carr et al     |
| EPI_ISL_512105  | National Virus Reference Laboratory | National Virus Reference Laboratory                                             | Michael Carr et al     |
| EPI_ISL_525363  | National Virus Reference Laboratory | National Virus Reference Laboratory                                             | Michael Carr et al     |
| EPI_ISL_525377  | National Virus Reference Laboratory | National Virus Reference Laboratory                                             | Michael Carr et al     |

|                 |                                     |                                                             |                        |
|-----------------|-------------------------------------|-------------------------------------------------------------|------------------------|
| EPI_ISL_752511  | National Virus Reference Laboratory | National Virus Reference Laboratory                         | Michael Carr et al     |
| EPI_ISL_767796  | National Virus Reference Laboratory | Irish Coronavirus Sequencing Consortium - Teagasc Moorepark | Calum Walsh et al      |
| EPI_ISL_767801  | National Virus Reference Laboratory | Irish Coronavirus Sequencing Consortium - Teagasc Moorepark | Calum Walsh et al      |
| EPI_ISL_789091  | National Virus Reference Laboratory | National Virus Reference Laboratory                         | Michael Carr et al     |
| EPI_ISL_789070  | National Virus Reference Laboratory | National Virus Reference Laboratory                         | Michael Carr et al     |
| EPI_ISL_789067  | National Virus Reference Laboratory | National Virus Reference Laboratory                         | Michael Carr et al     |
| EPI_ISL_732460  | National Virus Reference Laboratory | National Virus Reference Laboratory                         | Michael Carr et al     |
| EPI_ISL_911245  | National Virus Reference Laboratory | National Virus Reference Laboratory                         | Michael Carr et al     |
| EPI_ISL_501260  | National Virus Reference Laboratory | National Virus Reference Laboratory                         | Michael Carr et al     |
| EPI_ISL_578309  | National Virus Reference Laboratory | National Virus Reference Laboratory                         | Michael Carr et al     |
| EPI_ISL_578211  | National Virus Reference Laboratory | National Virus Reference Laboratory                         | Michael Carr et al     |
| EPI_ISL_639861  | National Virus Reference Laboratory | National Virus Reference Laboratory                         | Michael Carr et al     |
| EPI_ISL_639854  | National Virus Reference Laboratory | National Virus Reference Laboratory                         | Michael Carr et al     |
| EPI_ISL_639841  | National Virus Reference Laboratory | National Virus Reference Laboratory                         | Michael Carr et al     |
| EPI_ISL_837380  | National Virus Reference Laboratory | National Virus Reference Laboratory                         | Michael Carr et al     |
| EPI_ISL_837365  | National Virus Reference Laboratory | National Virus Reference Laboratory                         | Michael Carr et al     |
| EPI_ISL_875471  | National Virus Reference Laboratory | National Virus Reference Laboratory                         | Michael Carr et al     |
| EPI_ISL_578315  | National Virus Reference Laboratory | National Virus Reference Laboratory                         | Michael Carr et al     |
| EPI_ISL_767724  | National Virus Reference Laboratory | Irish Coronavirus Sequencing Consortium - Teagasc Moorepark | Calum Walsh et al      |
| EPI_ISL_512099  | National Virus Reference Laboratory | National Virus Reference Laboratory                         | Michael Carr et al     |
| EPI_ISL_525386  | National Virus Reference Laboratory | National Virus Reference Laboratory                         | Michael Carr et al     |
| EPI_ISL_525365  | National Virus Reference Laboratory | National Virus Reference Laboratory                         | Michael Carr et al     |
| EPI_ISL_732473  | National Virus Reference Laboratory | National Virus Reference Laboratory                         | Michael Carr et al     |
| EPI_ISL_752516  | National Virus Reference Laboratory | National Virus Reference Laboratory                         | Michael Carr et al     |
| EPI_ISL_981263  | National Virus Reference Laboratory | Irish Coronavirus Sequencing Consortium - Helixworks        | Sachin Chalapati et al |
| EPI_ISL_666693  | National Virus Reference Lab (NVRL) | Irish Coronavirus Sequencing Consortium-Teagasc Grange      | Matthew McCabe et al   |
| EPI_ISL_666710  | National Virus Reference Lab (NVRL) | Irish Coronavirus Sequencing Consortium-Teagasc Grange      | Matthew McCabe et al   |
| EPI_ISL_525354  | National Virus Reference Laboratory | National Virus Reference Laboratory                         | Michael Carr et al     |
| EPI_ISL_525360  | National Virus Reference Laboratory | National Virus Reference Laboratory                         | Michael Carr et al     |
| EPI_ISL_525391  | National Virus Reference Laboratory | National Virus Reference Laboratory                         | Michael Carr et al     |
| EPI_ISL_837394  | National Virus Reference Laboratory | National Virus Reference Laboratory                         | Michael Carr et al     |
| EPI_ISL_605059  | National Virus Reference Laboratory | Irish Coronavirus Sequencing Consortium - Helixworks        | Sachin Chalapati et al |
| EPI_ISL_981223  | National Virus Reference Laboratory | Irish Coronavirus Sequencing Consortium - Helixworks        | Sachin Chalapati et al |
| EPI_ISL_909848  | National Virus Reference Laboratory | National Virus Reference Laboratory                         | Michael Carr et al     |
| EPI_ISL_1001262 | National Virus Reference Laboratory | National Virus Reference Laboratory                         | Michael Carr et al     |
| EPI_ISL_681924  | National Virus Reference Laboratory | Irish Coronavirus Sequencing Consortium - Teagasc Moorepark | Paul Cotter et al      |
| EPI_ISL_981269  | National Virus Reference Laboratory | Irish Coronavirus Sequencing Consortium - Helixworks        | Sachin Chalapati et al |
| EPI_ISL_875352  | National Virus Reference Laboratory | National Virus Reference Laboratory                         | Michael Carr et al     |
| EPI_ISL_981207  | National Virus Reference Laboratory | Irish Coronavirus Sequencing Consortium - Helixworks        | Sachin Chalapati et al |

|                |                                                                                                                            |                                                             |                         |
|----------------|----------------------------------------------------------------------------------------------------------------------------|-------------------------------------------------------------|-------------------------|
| EPI_ISL_671349 | National Virus Reference Laboratory                                                                                        | Irish Coronavirus Sequencing Consortium - Teagasc Moorepark | Calm Walsh et al        |
| EPI_ISL_525369 | National Virus Reference Laboratory                                                                                        | National Virus Reference Laboratory                         | Michael Carr et al      |
| EPI_ISL_447466 | Clinical Microbiology Laboratory, Sheba Medical Center                                                                     | Stern Lab                                                   | Stern Lab et al         |
| EPI_ISL_447462 | Clinical Microbiology Laboratory, Sheba Medical Center                                                                     | Stern Lab                                                   | Stern Lab et al         |
| EPI_ISL_447459 | Clinical Microbiology Laboratory, Sheba Medical Center                                                                     | Stern Lab                                                   | Stern Lab et al         |
| EPI_ISL_447457 | Clinical Microbiology Laboratory, Sheba Medical Center                                                                     | Stern Lab                                                   | Stern Lab et al         |
| EPI_ISL_447455 | Clinical Microbiology Laboratory, Sheba Medical Center                                                                     | Stern Lab                                                   | Stern Lab et al         |
| EPI_ISL_447328 | Clinical Virology Laboratory, Soroka Medical Center and the Faculty of Health Sciences, Ben-Gurion University of the Negev | Stern Lab                                                   | Stern Lab et al         |
| EPI_ISL_944469 | Israel Central Virology laboratory                                                                                         | Israel National Consortium for SARS-CoV-2 sequencing        | Neta Zuckerman et al    |
| EPI_ISL_944471 | Israel Central Virology laboratory                                                                                         | Israel National Consortium for SARS-CoV-2 sequencing        | Neta Zuckerman et al    |
| EPI_ISL_944522 | Israel Central Virology laboratory                                                                                         | Israel National Consortium for SARS-CoV-2 sequencing        | Neta Zuckerman et al    |
| EPI_ISL_944525 | Israel Central Virology laboratory                                                                                         | Israel National Consortium for SARS-CoV-2 sequencing        | Neta Zuckerman et al    |
| EPI_ISL_944529 | Israel Central Virology laboratory                                                                                         | Israel National Consortium for SARS-CoV-2 sequencing        | Neta Zuckerman et al    |
| EPI_ISL_944530 | Israel Central Virology laboratory                                                                                         | Israel National Consortium for SARS-CoV-2 sequencing        | Neta Zuckerman et al    |
| EPI_ISL_944538 | Israel Central Virology laboratory                                                                                         | Israel National Consortium for SARS-CoV-2 sequencing        | Neta Zuckerman et al    |
| EPI_ISL_944494 | Israel Central Virology laboratory                                                                                         | Israel National Consortium for SARS-CoV-2 sequencing        | Neta Zuckerman et al    |
| EPI_ISL_944495 | Israel Central Virology laboratory                                                                                         | Israel National Consortium for SARS-CoV-2 sequencing        | Neta Zuckerman et al    |
| EPI_ISL_944514 | Israel Central Virology laboratory                                                                                         | Israel National Consortium for SARS-CoV-2 sequencing        | Neta Zuckerman et al    |
| EPI_ISL_944542 | Israel Central Virology laboratory                                                                                         | Israel National Consortium for SARS-CoV-2 sequencing        | Neta Zuckerman et al    |
| EPI_ISL_889051 | Israel Central Virology laboratory                                                                                         | Israel National Consortium for SARS-CoV-2 sequencing        | Neta Zuckerman et al    |
| EPI_ISL_944199 | Israel Central Virology laboratory                                                                                         | Israel National Consortium for SARS-CoV-2 sequencing        | Neta Zuckerman et al    |
| EPI_ISL_889061 | Israel Central Virology laboratory                                                                                         | Israel National Consortium for SARS-CoV-2 sequencing        | Neta Zuckerman et al    |
| EPI_ISL_944441 | Israel Central Virology laboratory                                                                                         | Israel National Consortium for SARS-CoV-2 sequencing        | Neta Zuckerman et al    |
| EPI_ISL_944443 | Israel Central Virology laboratory                                                                                         | Israel National Consortium for SARS-CoV-2 sequencing        | Neta Zuckerman et al    |
| EPI_ISL_737204 | Central Virology Laboratory, Israel Ministry of Health                                                                     | Central Virology Laboratory, Israel Ministry of Health      | Neta S. Zuckerman et al |
| EPI_ISL_944245 | Israel Central Virology laboratory                                                                                         | Israel National Consortium for SARS-CoV-2 sequencing        | Neta Zuckerman et al    |
| EPI_ISL_889070 | Israel Central Virology laboratory                                                                                         | Israel National Consortium for SARS-CoV-2 sequencing        | Neta Zuckerman et al    |
| EPI_ISL_804141 | Israel Central Virology laboratory                                                                                         | Israel National Consortium for SARS-CoV-2 sequencing        | Neta Zuckerman et al    |
| EPI_ISL_889141 | Israel Central Virology laboratory                                                                                         | Israel National Consortium for SARS-CoV-2 sequencing        | Neta Zuckerman et al    |
| EPI_ISL_889144 | Israel Central Virology laboratory                                                                                         | Israel National Consortium for SARS-CoV-2 sequencing        | Neta Zuckerman et al    |
| EPI_ISL_474965 | Israel Central Virology laboratory                                                                                         | Israel Central Virology laboratory                          | Neta Zuckerman et al    |
| EPI_ISL_474961 | Israel Central Virology laboratory                                                                                         | Israel Central Virology laboratory                          | Neta Zuckerman et al    |
| EPI_ISL_474999 | Israel Central Virology laboratory                                                                                         | Israel Central Virology laboratory                          | Neta Zuckerman et al    |
| EPI_ISL_474959 | Israel Central Virology laboratory                                                                                         | Israel Central Virology laboratory                          | Neta Zuckerman et al    |
| EPI_ISL_475008 | Israel Central Virology laboratory                                                                                         | Israel Central Virology laboratory                          | Neta Zuckerman et al    |
| EPI_ISL_474970 | Israel Central Virology laboratory                                                                                         | Israel Central Virology laboratory                          | Neta Zuckerman et al    |
| EPI_ISL_514313 | Israel Central Virology laboratory                                                                                         | Israel Central Virology laboratory                          | Neta Zuckerman et al    |
| EPI_ISL_516889 | Israel Central Virology laboratory                                                                                         | Israel Central Virology laboratory                          | Neta Zuckerman et al    |
| EPI_ISL_516891 | Israel Central Virology laboratory                                                                                         | Israel Central Virology laboratory                          | Neta Zuckerman et al    |

|                |                                          |                                                                           |                         |
|----------------|------------------------------------------|---------------------------------------------------------------------------|-------------------------|
| EPI_ISL_516892 | Israeli Central Virology laboratory      | Israel Central Virology laboratory                                        | Neta Zuckerman et al    |
| EPI_ISL_516895 | Israel Central Virology laboratory       | Israel Central Virology laboratory                                        | Neta Zuckerman et al    |
| EPI_ISL_516897 | Israel Central Virology laboratory       | Israel Central Virology laboratory                                        | Neta Zuckerman et al    |
| EPI_ISL_516899 | Israel Central Virology laboratory       | Israel Central Virology laboratory                                        | Neta Zuckerman et al    |
| EPI_ISL_649093 | Israel Central Virology laboratory       | Israel Central Virology laboratory                                        | Neta Zuckerman et al    |
| EPI_ISL_649086 | Israel Central Virology laboratory       | Israel Central Virology laboratory                                        | Neta Zuckerman et al    |
| EPI_ISL_514283 | Israel Central Virology laboratory       | Israel Central Virology laboratory                                        | Neta Zuckerman et al    |
| EPI_ISL_514284 | Israel Central Virology laboratory       | Israel Central Virology laboratory                                        | Neta Zuckerman et al    |
| EPI_ISL_514286 | Israel Central Virology laboratory       | Israel Central Virology laboratory                                        | Neta Zuckerman et al    |
| EPI_ISL_514288 | Israel Central Virology laboratory       | Israel Central Virology laboratory                                        | Neta Zuckerman et al    |
| EPI_ISL_514294 | Israel Central Virology laboratory       | Israel Central Virology laboratory                                        | Neta Zuckerman et al    |
| EPI_ISL_514297 | Israel Central Virology laboratory       | Israel Central Virology laboratory                                        | Neta Zuckerman et al    |
| EPI_ISL_514299 | Israel Central Virology laboratory       | Israel Central Virology laboratory                                        | Neta Zuckerman et al    |
| EPI_ISL_514300 | Israel Central Virology laboratory       | Israel Central Virology laboratory                                        | Neta Zuckerman et al    |
| EPI_ISL_649073 | Israel Central Virology laboratory       | Israel Central Virology laboratory                                        | Neta Zuckerman et al    |
| EPI_ISL_649102 | Israel Central Virology laboratory       | Israel Central Virology laboratory                                        | Neta Zuckerman et al    |
| EPI_ISL_649068 | Israel Central Virology laboratory       | Israel Central Virology laboratory                                        | Neta Zuckerman et al    |
| EPI_ISL_649072 | Israel Central Virology laboratory       | Israel Central Virology laboratory                                        | Neta Zuckerman et al    |
| EPI_ISL_649094 | Israel Central Virology laboratory       | Israel Central Virology laboratory                                        | Neta Zuckerman et al    |
| EPI_ISL_575332 | Israel Central Virology laboratory       | Israel Central Virology laboratory                                        | Neta Zuckerman et al    |
| EPI_ISL_575333 | Israel Central Virology laboratory       | Israel Central Virology laboratory                                        | Neta Zuckerman et al    |
| EPI_ISL_575334 | Israel Central Virology laboratory       | Israel Central Virology laboratory                                        | Neta Zuckerman et al    |
| EPI_ISL_516920 | Israel Central Virology laboratory       | Israel Central Virology laboratory                                        | Neta Zuckerman et al    |
| EPI_ISL_419210 | The Chaim Sheba Medical Center           | Israel Institute for Biological Research                                  | Inbar Cohen-Gihon et al |
| EPI_ISL_419211 | Central Virology Laboratory              | Israel Institute for Biological Research                                  | Inbar Cohen-Gihon et al |
| EPI_ISL_594159 | Israel Institute for Biological Research | Israel Institute for Biological Research                                  | Galia Zaide et al       |
| EPI_ISL_594160 | Israel Institute for Biological Research | Israel Institute for Biological Research                                  | Galia Zaide et al       |
| EPI_ISL_594162 | Israel Institute for Biological Research | Israel Institute for Biological Research                                  | Galia Zaide et al       |
| EPI_ISL_594161 | Israel Institute for Biological Research | Israel Institute for Biological Research                                  | Galia Zaide et al       |
| EPI_ISL_483725 | Israel Central Virology laboratory       | Israel Central Virology laboratory                                        | Neta Zuckerman et al    |
| EPI_ISL_806798 | SIESP CHIETI - DRIVE IN ORTONA           | Istituto Zooprofilattico Sperimentale dell'Abruzzo e Molise "G. Caporale" | Lorusso A et al         |
| EPI_ISL_961072 | SIESP CHIETI - DRIVE IN CHIETI           | Istituto Zooprofilattico Sperimentale dell'Abruzzo e Molise "G. Caporale" | Lorusso A et al         |
| EPI_ISL_965266 | SIESP CHIETI                             | Istituto Zooprofilattico Sperimentale dell'Abruzzo e Molise "G. Caporale" | Lorusso A et al         |
| EPI_ISL_961738 | SIESP CHIETI DRIVE IN LANCIANO           | Istituto Zooprofilattico Sperimentale dell'Abruzzo e Molise "G. Caporale" | Lorusso A et al         |
| EPI_ISL_961721 | SIESP CHIETI - DRIVE IN ORTONA           | Istituto Zooprofilattico Sperimentale dell'Abruzzo e Molise "G. Caporale" | Lorusso A et al         |
| EPI_ISL_961722 | SIESP CHIETI - DRIVE IN ORTONA           | Istituto Zooprofilattico Sperimentale dell'Abruzzo e Molise "G. Caporale" | Lorusso A et al         |
| EPI_ISL_961744 | SIESP CHIETI - DRIVE IN ORTONA           | Istituto Zooprofilattico Sperimentale dell'Abruzzo e Molise "G. Caporale" | Lorusso A et al         |
| EPI_ISL_961719 | SIESP CHIETI - DRIVE IN ORTONA           | Istituto Zooprofilattico Sperimentale dell'Abruzzo e Molise "G. Caporale" | Lorusso A et al         |
| EPI_ISL_965261 | SIESP CHIETI                             | Istituto Zooprofilattico Sperimentale dell'Abruzzo e Molise "G. Caporale" | Lorusso A et al         |

|                 |                                                                                                                  |                                                                                                              |                    |
|-----------------|------------------------------------------------------------------------------------------------------------------|--------------------------------------------------------------------------------------------------------------|--------------------|
| EPI_ISL_849662  | Servizio di igiene epidemiologia e sanità pubblica (SIESP)-Chieti                                                | Istituto Zooprofilattico Sperimentale dell'Abruzzo e Molise "G. Caporale"                                    | Lorusso A et al    |
| EPI_ISL_875566  | SIESP L'AQUILA                                                                                                   | Istituto Zooprofilattico Sperimentale dell'Abruzzo e Molise "G. Caporale"                                    | Lorusso A et al    |
| EPI_ISL_875567  | SIESP L'AQUILA                                                                                                   | Istituto Zooprofilattico Sperimentale dell'Abruzzo e Molise "G. Caporale"                                    | Lorusso A et al    |
| EPI_ISL_875568  | SIESP L'AQUILA                                                                                                   | Istituto Zooprofilattico Sperimentale dell'Abruzzo e Molise "G. Caporale"                                    | Lorusso A et al    |
| EPI_ISL_529022  | Ospedale "Ss. Annunziata"                                                                                        | Istituto Zooprofilattico Sperimentale dell'Abruzzo e Molise "G. Caporale"                                    | Lorusso A et al    |
| EPI_ISL_529023  | Servizio di igiene epidemiologia e sanità pubblica (SIESP)-Chieti                                                | Istituto Zooprofilattico Sperimentale dell'Abruzzo e Molise "G. Caporale"                                    | Lorusso A et al    |
| EPI_ISL_529024  | Servizio di igiene epidemiologia e sanità pubblica (SIESP)-Chieti                                                | Istituto Zooprofilattico Sperimentale dell'Abruzzo e Molise "G. Caporale"                                    | Lorusso A et al    |
| EPI_ISL_529025  | Servizio di igiene epidemiologia e sanità pubblica (SIESP)-Chieti                                                | Istituto Zooprofilattico Sperimentale dell'Abruzzo e Molise "G. Caporale"                                    | Lorusso A et al    |
| EPI_ISL_528924  | Ospedale "Giuseppe Mazzini"-Teramo                                                                               | Istituto Zooprofilattico Sperimentale dell'Abruzzo e Molise "G. Caporale"                                    | Lorusso A et al    |
| EPI_ISL_429226  | Presidio Ospedaliero Santo Spirito                                                                               | Istituto Zooprofilattico Sperimentale dell'Abruzzo e Molise "G. Caporale"                                    | Lorusso A et al    |
| EPI_ISL_849654  | Servizio Igiene Epidemiologia e Sanità Pubblica (SIESP)-L'Aquila                                                 | Istituto Zooprofilattico Sperimentale dell'Abruzzo e Molise "G. Caporale"                                    | Lorusso A et al    |
| EPI_ISL_529010  | Servizio Igiene Epidemiologia e Sanità Pubblica (SIESP)-L'Aquila                                                 | Istituto Zooprofilattico Sperimentale dell'Abruzzo e Molise "G. Caporale"                                    | Lorusso A et al    |
| EPI_ISL_529012  | Servizio Igiene Epidemiologia e Sanità Pubblica (SIESP)-L'Aquila                                                 | Istituto Zooprofilattico Sperimentale dell'Abruzzo e Molise "G. Caporale"                                    | Lorusso A et al    |
| EPI_ISL_529013  | Presidio Ospedaliero "S. Filippo e Nicola"-Avezzano                                                              | Istituto Zooprofilattico Sperimentale dell'Abruzzo e Molise "G. Caporale"                                    | Lorusso A et al    |
| EPI_ISL_849650  | Servizio di igiene epidemiologia e sanità pubblica (SIESP)-Chieti                                                | Istituto Zooprofilattico Sperimentale dell'Abruzzo e Molise "G. Caporale"                                    | Lorusso A et al    |
| EPI_ISL_849652  | Servizio di igiene epidemiologia e sanità pubblica (SIESP)-Chieti                                                | Istituto Zooprofilattico Sperimentale dell'Abruzzo e Molise "G. Caporale"                                    | Lorusso A et al    |
| EPI_ISL_529014  | Ospedale "Ss. Annunziata"                                                                                        | Istituto Zooprofilattico Sperimentale dell'Abruzzo e Molise "G. Caporale"                                    | Lorusso A et al    |
| EPI_ISL_529015  | Ospedale "Ss. Annunziata"                                                                                        | Istituto Zooprofilattico Sperimentale dell'Abruzzo e Molise "G. Caporale"                                    | Lorusso A et al    |
| EPI_ISL_722897  | Dipartimento di Scienze Biomediche e Oncologia Umana - Azienda Ospedaliero Universitaria Consorziata Policlinico | Istituto Zooprofilattico Sperimentale della Puglia e della Basilicata                                        | Parisi A. et al    |
| EPI_ISL_722856  | Dipartimento di Scienze Biomediche e Oncologia Umana - Azienda Ospedaliero Universitaria Consorziata Policlinico | Istituto Zooprofilattico Sperimentale della Puglia e della Basilicata                                        | Parisi A. et al    |
| EPI_ISL_722857  | Dipartimento di Scienze Biomediche e Oncologia Umana - Azienda Ospedaliero Universitaria Consorziata Policlinico | Istituto Zooprofilattico Sperimentale della Puglia e della Basilicata                                        | Parisi A. et al    |
| EPI_ISL_722872  | Dipartimento di Scienze Biomediche e Oncologia Umana - Azienda Ospedaliero Universitaria Consorziata Policlinico | Istituto Zooprofilattico Sperimentale della Puglia e della Basilicata                                        | Parisi A. et al    |
| EPI_ISL_722858  | Dipartimento di Scienze Biomediche e Oncologia Umana - Azienda Ospedaliero Universitaria Consorziata Policlinico | Istituto Zooprofilattico Sperimentale della Puglia e della Basilicata                                        | Parisi A. et al    |
| EPI_ISL_722871  | I.R.C.C.S. "S. De Bellis" - Ente Ospedaliero                                                                     | Istituto Zooprofilattico Sperimentale della Puglia e della Basilicata                                        | Parisi A. et al    |
| EPI_ISL_653818  | I.R.C.C.S. "S. De Bellis" - Ente Ospedaliero                                                                     | Istituto Zooprofilattico Sperimentale della Puglia e della Basilicata                                        | Parisi A. et al    |
| EPI_ISL_794748  | SISP ASL BA AREA SUD                                                                                             | Istituto Zooprofilattico Sperimentale della Puglia e della Basilicata                                        | Parisi A. et al    |
| EPI_ISL_794788  | Istituto Zooprofilattico Sperimentale della Puglia e della Basilicata                                            | Istituto Zooprofilattico Sperimentale della Puglia e della Basilicata                                        | Parisi A. et al    |
| EPI_ISL_1000969 | Presidio di Brindisi Di Summa - Perrino                                                                          | Istituto Zooprofilattico Sperimentale della Puglia e della Basilicata                                        | Parisi A. et al    |
| EPI_ISL_788967  | Ospedale "Di Venere"                                                                                             | Beaconlab (Bioinformatics, Evolution and Comparative Genomics lab), Dept of Biosciences, University on Milan | Iacobellis M et al |
| EPI_ISL_788960  | Ospedale "Di Venere"                                                                                             | Beaconlab (Bioinformatics, Evolution and Comparative Genomics lab), Dept of Biosciences, University on Milan | Iacobellis M et al |
| EPI_ISL_949182  | University of Bari Biomedical Sciences and Human Oncology                                                        | University of Bari Biomedical Sciences and Human Oncology                                                    | Chironna M. et al  |
| EPI_ISL_949184  | University of Bari Biomedical Sciences and Human Oncology                                                        | University of Bari Biomedical Sciences and Human Oncology                                                    | Chironna M. et al  |
| EPI_ISL_949188  | University of Bari Biomedical Sciences and Human Oncology                                                        | University of Bari Biomedical Sciences and Human Oncology                                                    | Chironna A. et al  |

|                |                                                                                                                                                                                                                                                                                                                                                                                                                                                                                               |                                                                                                                                                                        |                                              |
|----------------|-----------------------------------------------------------------------------------------------------------------------------------------------------------------------------------------------------------------------------------------------------------------------------------------------------------------------------------------------------------------------------------------------------------------------------------------------------------------------------------------------|------------------------------------------------------------------------------------------------------------------------------------------------------------------------|----------------------------------------------|
| EPI_ISL_525563 | Istituto Zooprofilattico Sperimentale Puglia e Basilicata; Dipartimento di Bioscienze, Biotecnologie e Biofarmaceutica dell'Università degli Studi di Bari "A.Moro"; Istituto di Biomembrane. Bioenergetica e Biotecnologie Molecolari del Consiglio Nazionale delle Ricerche di Bari                                                                                                                                                                                                         | Beaconlab (Bioinformatics, Evolution and Comparative Genomics lab), Dept of Biosciences, University on Milan                                                           | Parisi A. et al                              |
| EPI_ISL_525567 | Istituto Zooprofilattico Sperimentale Puglia e Basilicata; Dipartimento di Bioscienze, Biotecnologie e Biofarmaceutica dell'Università degli Studi di Bari "A.Moro"; Istituto di Biomembrane. Bioenergetica e Biotecnologie Molecolari del Consiglio Nazionale delle Ricerche di Bari                                                                                                                                                                                                         | Beaconlab (Bioinformatics, Evolution and Comparative Genomics lab), Dept of Biosciences, University on Milan                                                           | Parisi A. et al                              |
| EPI_ISL_477195 | Istituto Zooprofilattico Sperimentale Puglia e Basilicata;                                                                                                                                                                                                                                                                                                                                                                                                                                    | Beaconlab (Bioinformatics, Evolution and Comparative Genomics lab), Dept of Biosciences, University on Milan                                                           | Parisi A. et al                              |
| EPI_ISL_969131 | Laboratorio Microbiologia e Virologia P.O. Cotugno A.O. dei Colli                                                                                                                                                                                                                                                                                                                                                                                                                             | Laboratorio Microbiologia e Virologia P.O. Cotugno A.O. dei Colli                                                                                                      | Luigi Atripaldi et al                        |
| EPI_ISL_969227 | Laboratorio Microbiologia e Virologia P.O. Cotugno A.O. dei Colli                                                                                                                                                                                                                                                                                                                                                                                                                             | Laboratorio Microbiologia e Virologia P.O. Cotugno A.O. dei Colli                                                                                                      | Luigi Atripaldi et al                        |
| EPI_ISL_877022 | 1.AO Universitaria 'S. Giovanni di Dio e Ruggi D'Aragona, Scuola Medica Salernitana' Hospital / 2.UOC di Virologia e Microbiologia, Università della Campania 'L. Vanvitelli' / 3.AO Universitaria 'Federico II' Napoli Hospital / 4.AORN 'San Giuseppe Moscati' Avellino Hospital / 5.AO 'San Pio - presidio G. Rummo' Benevento Hospital / 6.AO 'Sant'Anna e San Sebastiano' Caserta Hospital / 7.PO 'Maria Santissima Addolorata' Eboli Hospital / 8.Biogem Istituto di Ricerche Genetiche | 1. Genome Research Center for Health (CRGS) / 2. Laboratory of Molecular Medicine and Genomics(LMMGe) / 3. Center for Research in Pure and Applied Mathematics (CRMPA) | Giorgio Giurato (Corresponding Author) et al |
| EPI_ISL_935108 | 1.AO Universitaria 'S. Giovanni di Dio e Ruggi D'Aragona, Scuola Medica Salernitana' Hospital / 2.UOC di Virologia e Microbiologia, Università della Campania 'L. Vanvitelli' / 3.AO Universitaria 'Federico II' Napoli Hospital / 4.AORN 'San Giuseppe Moscati' Avellino Hospital / 5.AO 'San Pio - presidio G. Rummo' Benevento Hospital / 6.AO 'Sant'Anna e San Sebastiano' Caserta Hospital / 7.PO 'Maria Santissima Addolorata' Eboli Hospital / 8.Biogem Istituto di Ricerche Genetiche | 1. Genome Research Center for Health (CRGS) / 2. Laboratory of Molecular Medicine and Genomics(LMMGe) / 3. Center for Research in Pure and Applied Mathematics (CRMPA) | Giorgio Giurato (Corresponding Author) et al |
| EPI_ISL_935109 | 1.AO Universitaria 'S. Giovanni di Dio e Ruggi D'Aragona, Scuola Medica Salernitana' Hospital / 2.UOC di Virologia e Microbiologia, Università della Campania 'L. Vanvitelli' / 3.AO Universitaria 'Federico II' Napoli Hospital / 4.AORN 'San Giuseppe Moscati' Avellino Hospital / 5.AO 'San Pio - presidio G. Rummo' Benevento Hospital / 6.AO 'Sant'Anna e San Sebastiano' Caserta Hospital / 7.PO 'Maria Santissima Addolorata' Eboli Hospital / 8.Biogem Istituto di Ricerche Genetiche | 1. Genome Research Center for Health (CRGS) / 2. Laboratory of Molecular Medicine and Genomics(LMMGe) / 3. Center for Research in Pure and Applied Mathematics (CRMPA) | Giorgio Giurato (Corresponding Author) et al |
| EPI_ISL_935110 | 1.AO Universitaria 'S. Giovanni di Dio e Ruggi D'Aragona, Scuola Medica Salernitana' Hospital / 2.UOC di Virologia e Microbiologia, Università della Campania 'L. Vanvitelli' / 3.AO Universitaria 'Federico II' Napoli Hospital / 4.AORN 'San Giuseppe Moscati' Avellino Hospital / 5.AO 'San Pio - presidio G. Rummo' Benevento Hospital / 6.AO 'Sant'Anna e San Sebastiano' Caserta Hospital / 7.PO 'Maria Santissima Addolorata' Eboli Hospital / 8.Biogem Istituto di Ricerche Genetiche | 1. Genome Research Center for Health (CRGS) / 2. Laboratory of Molecular Medicine and Genomics(LMMGe) / 3. Center for Research in Pure and Applied Mathematics (CRMPA) | Giorgio Giurato (Corresponding Author) et al |
| EPI_ISL_935112 | 1.AO Universitaria 'S. Giovanni di Dio e Ruggi D'Aragona, Scuola Medica Salernitana' Hospital / 2.UOC di Virologia e Microbiologia, Università della Campania 'L. Vanvitelli' / 3.AO Universitaria 'Federico II' Napoli Hospital / 4.AORN 'San Giuseppe Moscati' Avellino Hospital / 5.AO 'San Pio - presidio G. Rummo' Benevento Hospital / 6.AO 'Sant'Anna e San Sebastiano' Caserta Hospital / 7.PO 'Maria Santissima Addolorata' Eboli Hospital / 8.Biogem Istituto di Ricerche Genetiche | 1. Genome Research Center for Health (CRGS) / 2. Laboratory of Molecular Medicine and Genomics(LMMGe) / 3. Center for Research in Pure and Applied Mathematics (CRMPA) | Giorgio Giurato (Corresponding Author) et al |



|                |                                                                                                                                                                                                                                                                                                                                                                                                                                                                                               |                                                                                                                                                                        |                                              |
|----------------|-----------------------------------------------------------------------------------------------------------------------------------------------------------------------------------------------------------------------------------------------------------------------------------------------------------------------------------------------------------------------------------------------------------------------------------------------------------------------------------------------|------------------------------------------------------------------------------------------------------------------------------------------------------------------------|----------------------------------------------|
| EPI_ISL_935116 | 1.AO Universitaria 'S. Giovanni di Dio e Ruggi D'Aragona, Scuola Medica Salernitana' Hospital / 2.UOC di Virologia e Microbiologia, Università della Campania 'L. Vanvitelli' / 3.AO Universitaria 'Federico II' Napoli Hospital / 4.AORN 'San Giuseppe Moscati' Avellino Hospital / 5.AO 'San Pio - presidio G. Rummo' Benevento Hospital / 6.AO 'Sant'Anna e San Sebastiano' Caserta Hospital / 7.PO 'Maria Santissima Addolorata' Eboli Hospital / 8.Biogem Istituto di Ricerche Genetiche | 1. Genome Research Center for Health (CRGS) / 2. Laboratory of Molecular Medicine and Genomics(LMMGe) / 3. Center for Research in Pure and Applied Mathematics (CRMPA) | Giorgio Giurato (Corresponding Author) et al |
| EPI_ISL_918458 | 1.AO Universitaria 'S. Giovanni di Dio e Ruggi D'Aragona, Scuola Medica Salernitana' Hospital / 2.UOC di Virologia e Microbiologia, Università della Campania 'L. Vanvitelli' / 3.AO Universitaria 'Federico II' Napoli Hospital / 4.AORN 'San Giuseppe Moscati' Avellino Hospital / 5.AO 'San Pio - presidio G. Rummo' Benevento Hospital / 6.AO 'Sant'Anna e San Sebastiano' Caserta Hospital / 7.PO 'Maria Santissima Addolorata' Eboli Hospital / 8.Biogem Istituto di Ricerche Genetiche | 1. Genome Research Center for Health (CRGS) / 2. Laboratory of Molecular Medicine and Genomics(LMMGe) / 3. Center for Research in Pure and Applied Mathematics (CRMPA) | Giorgio Giurato (Corresponding Author) et al |
| EPI_ISL_935119 | 1.AO Universitaria 'S. Giovanni di Dio e Ruggi D'Aragona, Scuola Medica Salernitana' Hospital / 2.UOC di Virologia e Microbiologia, Università della Campania 'L. Vanvitelli' / 3.AO Universitaria 'Federico II' Napoli Hospital / 4.AORN 'San Giuseppe Moscati' Avellino Hospital / 5.AO 'San Pio - presidio G. Rummo' Benevento Hospital / 6.AO 'Sant'Anna e San Sebastiano' Caserta Hospital / 7.PO 'Maria Santissima Addolorata' Eboli Hospital / 8.Biogem Istituto di Ricerche Genetiche | 1. Genome Research Center for Health (CRGS) / 2. Laboratory of Molecular Medicine and Genomics(LMMGe) / 3. Center for Research in Pure and Applied Mathematics (CRMPA) | Giorgio Giurato (Corresponding Author) et al |
| EPI_ISL_935124 | 1.AO Universitaria 'S. Giovanni di Dio e Ruggi D'Aragona, Scuola Medica Salernitana' Hospital / 2.UOC di Virologia e Microbiologia, Università della Campania 'L. Vanvitelli' / 3.AO Universitaria 'Federico II' Napoli Hospital / 4.AORN 'San Giuseppe Moscati' Avellino Hospital / 5.AO 'San Pio - presidio G. Rummo' Benevento Hospital / 6.AO 'Sant'Anna e San Sebastiano' Caserta Hospital / 7.PO 'Maria Santissima Addolorata' Eboli Hospital / 8.Biogem Istituto di Ricerche Genetiche | 1. Genome Research Center for Health (CRGS) / 2. Laboratory of Molecular Medicine and Genomics(LMMGe) / 3. Center for Research in Pure and Applied Mathematics (CRMPA) | Giorgio Giurato (Corresponding Author) et al |
| EPI_ISL_935128 | 1.AO Universitaria 'S. Giovanni di Dio e Ruggi D'Aragona, Scuola Medica Salernitana' Hospital / 2.UOC di Virologia e Microbiologia, Università della Campania 'L. Vanvitelli' / 3.AO Universitaria 'Federico II' Napoli Hospital / 4.AORN 'San Giuseppe Moscati' Avellino Hospital / 5.AO 'San Pio - presidio G. Rummo' Benevento Hospital / 6.AO 'Sant'Anna e San Sebastiano' Caserta Hospital / 7.PO 'Maria Santissima Addolorata' Eboli Hospital / 8.Biogem Istituto di Ricerche Genetiche | 1. Genome Research Center for Health (CRGS) / 2. Laboratory of Molecular Medicine and Genomics(LMMGe) / 3. Center for Research in Pure and Applied Mathematics (CRMPA) | Giorgio Giurato (Corresponding Author) et al |
| EPI_ISL_935132 | 1.AO Universitaria 'S. Giovanni di Dio e Ruggi D'Aragona, Scuola Medica Salernitana' Hospital / 2.UOC di Virologia e Microbiologia, Università della Campania 'L. Vanvitelli' / 3.AO Universitaria 'Federico II' Napoli Hospital / 4.AORN 'San Giuseppe Moscati' Avellino Hospital / 5.AO 'San Pio - presidio G. Rummo' Benevento Hospital / 6.AO 'Sant'Anna e San Sebastiano' Caserta Hospital / 7.PO 'Maria Santissima Addolorata' Eboli Hospital / 8.Biogem Istituto di Ricerche Genetiche | 1. Genome Research Center for Health (CRGS) / 2. Laboratory of Molecular Medicine and Genomics(LMMGe) / 3. Center for Research in Pure and Applied Mathematics (CRMPA) | Giorgio Giurato (Corresponding Author) et al |

|                |                                                                                                                                                                                                                                                                                                                                                                                                                                                                                               |                                                                                                                                                                        |                                              |
|----------------|-----------------------------------------------------------------------------------------------------------------------------------------------------------------------------------------------------------------------------------------------------------------------------------------------------------------------------------------------------------------------------------------------------------------------------------------------------------------------------------------------|------------------------------------------------------------------------------------------------------------------------------------------------------------------------|----------------------------------------------|
| EPI_ISL_935136 | 1.AO Universitaria 'S. Giovanni di Dio e Ruggi D'Aragona, Scuola Medica Salernitana' Hospital / 2.UOC di Virologia e Microbiologia, Università della Campania 'L. Vanvitelli' / 3.AO Universitaria 'Federico II' Napoli Hospital / 4.AORN 'San Giuseppe Moscati' Avellino Hospital / 5.AO 'San Pio - presidio G. Rummo' Benevento Hospital / 6.AO 'Sant'Anna e San Sebastiano' Caserta Hospital / 7.PO 'Maria Santissima Addolorata' Eboli Hospital / 8.Biogem Istituto di Ricerche Genetiche | 1. Genome Research Center for Health (CRGS) / 2. Laboratory of Molecular Medicine and Genomics(LMMGe) / 3. Center for Research in Pure and Applied Mathematics (CRMPA) | Giorgio Giurato (Corresponding Author) et al |
| EPI_ISL_935139 | 1.AO Universitaria 'S. Giovanni di Dio e Ruggi D'Aragona, Scuola Medica Salernitana' Hospital / 2.UOC di Virologia e Microbiologia, Università della Campania 'L. Vanvitelli' / 3.AO Universitaria 'Federico II' Napoli Hospital / 4.AORN 'San Giuseppe Moscati' Avellino Hospital / 5.AO 'San Pio - presidio G. Rummo' Benevento Hospital / 6.AO 'Sant'Anna e San Sebastiano' Caserta Hospital / 7.PO 'Maria Santissima Addolorata' Eboli Hospital / 8.Biogem Istituto di Ricerche Genetiche | 1. Genome Research Center for Health (CRGS) / 2. Laboratory of Molecular Medicine and Genomics(LMMGe) / 3. Center for Research in Pure and Applied Mathematics (CRMPA) | Giorgio Giurato (Corresponding Author) et al |
| EPI_ISL_935140 | 1.AO Universitaria 'S. Giovanni di Dio e Ruggi D'Aragona, Scuola Medica Salernitana' Hospital / 2.UOC di Virologia e Microbiologia, Università della Campania 'L. Vanvitelli' / 3.AO Universitaria 'Federico II' Napoli Hospital / 4.AORN 'San Giuseppe Moscati' Avellino Hospital / 5.AO 'San Pio - presidio G. Rummo' Benevento Hospital / 6.AO 'Sant'Anna e San Sebastiano' Caserta Hospital / 7.PO 'Maria Santissima Addolorata' Eboli Hospital / 8.Biogem Istituto di Ricerche Genetiche | 1. Genome Research Center for Health (CRGS) / 2. Laboratory of Molecular Medicine and Genomics(LMMGe) / 3. Center for Research in Pure and Applied Mathematics (CRMPA) | Giorgio Giurato (Corresponding Author) et al |
| EPI_ISL_935141 | 1.AO Universitaria 'S. Giovanni di Dio e Ruggi D'Aragona, Scuola Medica Salernitana' Hospital / 2.UOC di Virologia e Microbiologia, Università della Campania 'L. Vanvitelli' / 3.AO Universitaria 'Federico II' Napoli Hospital / 4.AORN 'San Giuseppe Moscati' Avellino Hospital / 5.AO 'San Pio - presidio G. Rummo' Benevento Hospital / 6.AO 'Sant'Anna e San Sebastiano' Caserta Hospital / 7.PO 'Maria Santissima Addolorata' Eboli Hospital / 8.Biogem Istituto di Ricerche Genetiche | 1. Genome Research Center for Health (CRGS) / 2. Laboratory of Molecular Medicine and Genomics(LMMGe) / 3. Center for Research in Pure and Applied Mathematics (CRMPA) | Giorgio Giurato (Corresponding Author) et al |
| EPI_ISL_935143 | 1.AO Universitaria 'S. Giovanni di Dio e Ruggi D'Aragona, Scuola Medica Salernitana' Hospital / 2.UOC di Virologia e Microbiologia, Università della Campania 'L. Vanvitelli' / 3.AO Universitaria 'Federico II' Napoli Hospital / 4.AORN 'San Giuseppe Moscati' Avellino Hospital / 5.AO 'San Pio - presidio G. Rummo' Benevento Hospital / 6.AO 'Sant'Anna e San Sebastiano' Caserta Hospital / 7.PO 'Maria Santissima Addolorata' Eboli Hospital / 8.Biogem Istituto di Ricerche Genetiche | 1. Genome Research Center for Health (CRGS) / 2. Laboratory of Molecular Medicine and Genomics(LMMGe) / 3. Center for Research in Pure and Applied Mathematics (CRMPA) | Giorgio Giurato (Corresponding Author) et al |
| EPI_ISL_935144 | 1.AO Universitaria 'S. Giovanni di Dio e Ruggi D'Aragona, Scuola Medica Salernitana' Hospital / 2.UOC di Virologia e Microbiologia, Università della Campania 'L. Vanvitelli' / 3.AO Universitaria 'Federico II' Napoli Hospital / 4.AORN 'San Giuseppe Moscati' Avellino Hospital / 5.AO 'San Pio - presidio G. Rummo' Benevento Hospital / 6.AO 'Sant'Anna e San Sebastiano' Caserta Hospital / 7.PO 'Maria Santissima Addolorata' Eboli Hospital / 8.Biogem Istituto di Ricerche Genetiche | 1. Genome Research Center for Health (CRGS) / 2. Laboratory of Molecular Medicine and Genomics(LMMGe) / 3. Center for Research in Pure and Applied Mathematics (CRMPA) | Giorgio Giurato (Corresponding Author) et al |

|                |                                                                                                                                                                                                                                                                                                                                                                                                                                                                                               |                                                                                                                                                                        |                                              |
|----------------|-----------------------------------------------------------------------------------------------------------------------------------------------------------------------------------------------------------------------------------------------------------------------------------------------------------------------------------------------------------------------------------------------------------------------------------------------------------------------------------------------|------------------------------------------------------------------------------------------------------------------------------------------------------------------------|----------------------------------------------|
| EPI_ISL_935145 | 1.AO Universitaria 'S. Giovanni di Dio e Ruggi D'Aragona, Scuola Medica Salernitana' Hospital / 2.UOC di Virologia e Microbiologia, Università della Campania 'L. Vanvitelli' / 3.AO Universitaria 'Federico II' Napoli Hospital / 4.AORN 'San Giuseppe Moscati' Avellino Hospital / 5.AO 'San Pio - presidio G. Rummo' Benevento Hospital / 6.AO 'Sant'Anna e San Sebastiano' Caserta Hospital / 7.PO 'Maria Santissima Addolorata' Eboli Hospital / 8.Biogem Istituto di Ricerche Genetiche | 1. Genome Research Center for Health (CRGS) / 2. Laboratory of Molecular Medicine and Genomics(LMMGe) / 3. Center for Research in Pure and Applied Mathematics (CRMPA) | Giorgio Giurato (Corresponding Author) et al |
| EPI_ISL_935148 | 1.AO Universitaria 'S. Giovanni di Dio e Ruggi D'Aragona, Scuola Medica Salernitana' Hospital / 2.UOC di Virologia e Microbiologia, Università della Campania 'L. Vanvitelli' / 3.AO Universitaria 'Federico II' Napoli Hospital / 4.AORN 'San Giuseppe Moscati' Avellino Hospital / 5.AO 'San Pio - presidio G. Rummo' Benevento Hospital / 6.AO 'Sant'Anna e San Sebastiano' Caserta Hospital / 7.PO 'Maria Santissima Addolorata' Eboli Hospital / 8.Biogem Istituto di Ricerche Genetiche | 1. Genome Research Center for Health (CRGS) / 2. Laboratory of Molecular Medicine and Genomics(LMMGe) / 3. Center for Research in Pure and Applied Mathematics (CRMPA) | Giorgio Giurato (Corresponding Author) et al |
| EPI_ISL_925098 | 1.AO Universitaria 'S. Giovanni di Dio e Ruggi D'Aragona, Scuola Medica Salernitana' Hospital / 2.UOC di Virologia e Microbiologia, Università della Campania 'L. Vanvitelli' / 3.AO Universitaria 'Federico II' Napoli Hospital / 4.AORN 'San Giuseppe Moscati' Avellino Hospital / 5.AO 'San Pio - presidio G. Rummo' Benevento Hospital / 6.AO 'Sant'Anna e San Sebastiano' Caserta Hospital / 7.PO 'Maria Santissima Addolorata' Eboli Hospital / 8.Biogem Istituto di Ricerche Genetiche | 1. Genome Research Center for Health (CRGS) / 2. Laboratory of Molecular Medicine and Genomics(LMMGe) / 3. Center for Research in Pure and Applied Mathematics (CRMPA) | Giorgio Giurato et al                        |
| EPI_ISL_882686 | 1.AO Universitaria 'S. Giovanni di Dio e Ruggi D'Aragona, Scuola Medica Salernitana' Hospital / 2.UOC di Virologia e Microbiologia, Università della Campania 'L. Vanvitelli' / 3.AO Universitaria 'Federico II' Napoli Hospital / 4.AORN 'San Giuseppe Moscati' Avellino Hospital / 5.AO 'San Pio - presidio G. Rummo' Benevento Hospital / 6.AO 'Sant'Anna e San Sebastiano' Caserta Hospital / 7.PO 'Maria Santissima Addolorata' Eboli Hospital / 8.Biogem Istituto di Ricerche Genetiche | 1. Genome Research Center for Health (CRGS) / 2. Laboratory of Molecular Medicine and Genomics(LMMGe) / 3. Center for Research in Pure and Applied Mathematics (CRMPA) | Giorgio Giurato et al                        |
| EPI_ISL_925099 | 1.AO Universitaria 'S. Giovanni di Dio e Ruggi D'Aragona, Scuola Medica Salernitana' Hospital / 2.UOC di Virologia e Microbiologia, Università della Campania 'L. Vanvitelli' / 3.AO Universitaria 'Federico II' Napoli Hospital / 4.AORN 'San Giuseppe Moscati' Avellino Hospital / 5.AO 'San Pio - presidio G. Rummo' Benevento Hospital / 6.AO 'Sant'Anna e San Sebastiano' Caserta Hospital / 7.PO 'Maria Santissima Addolorata' Eboli Hospital / 8.Biogem Istituto di Ricerche Genetiche | 1. Genome Research Center for Health (CRGS) / 2. Laboratory of Molecular Medicine and Genomics(LMMGe) / 3. Center for Research in Pure and Applied Mathematics (CRMPA) | Giorgio Giurato et al                        |
| EPI_ISL_925100 | 1.AO Universitaria 'S. Giovanni di Dio e Ruggi D'Aragona, Scuola Medica Salernitana' Hospital / 2.UOC di Virologia e Microbiologia, Università della Campania 'L. Vanvitelli' / 3.AO Universitaria 'Federico II' Napoli Hospital / 4.AORN 'San Giuseppe Moscati' Avellino Hospital / 5.AO 'San Pio - presidio G. Rummo' Benevento Hospital / 6.AO 'Sant'Anna e San Sebastiano' Caserta Hospital / 7.PO 'Maria Santissima Addolorata' Eboli Hospital / 8.Biogem Istituto di Ricerche Genetiche | 1. Genome Research Center for Health (CRGS) / 2. Laboratory of Molecular Medicine and Genomics(LMMGe) / 3. Center for Research in Pure and Applied Mathematics (CRMPA) | Giorgio Giurato et al                        |

|                |                                                                                                                                                                                                                                                                                                                                                                                                                                                                                               |                                                                                                                                                                        |                                              |
|----------------|-----------------------------------------------------------------------------------------------------------------------------------------------------------------------------------------------------------------------------------------------------------------------------------------------------------------------------------------------------------------------------------------------------------------------------------------------------------------------------------------------|------------------------------------------------------------------------------------------------------------------------------------------------------------------------|----------------------------------------------|
| EPI_ISL_876975 | 1.AO Universitaria 'S. Giovanni di Dio e Ruggi D'Aragona, Scuola Medica Salernitana' Hospital / 2.UOC di Virologia e Microbiologia, Università della Campania 'L. Vanvitelli' / 3.AO Universitaria 'Federico II' Napoli Hospital / 4.AORN 'San Giuseppe Moscati' Avellino Hospital / 5.AO 'San Pio - presidio G. Rummo' Benevento Hospital / 6.AO 'Sant'Anna e San Sebastiano' Caserta Hospital / 7.PO 'Maria Santissima Addolorata' Eboli Hospital / 8.Biogem Istituto di Ricerche Genetiche | 1. Genome Research Center for Health (CRGS) / 2. Laboratory of Molecular Medicine and Genomics(LMMGe) / 3. Center for Research in Pure and Applied Mathematics (CRMPA) | Giorgio Giurato (Corresponding Author) et al |
| EPI_ISL_925107 | 1.AO Universitaria 'S. Giovanni di Dio e Ruggi D'Aragona, Scuola Medica Salernitana' Hospital / 2.UOC di Virologia e Microbiologia, Università della Campania 'L. Vanvitelli' / 3.AO Universitaria 'Federico II' Napoli Hospital / 4.AORN 'San Giuseppe Moscati' Avellino Hospital / 5.AO 'San Pio - presidio G. Rummo' Benevento Hospital / 6.AO 'Sant'Anna e San Sebastiano' Caserta Hospital / 7.PO 'Maria Santissima Addolorata' Eboli Hospital / 8.Biogem Istituto di Ricerche Genetiche | 1. Genome Research Center for Health (CRGS) / 2. Laboratory of Molecular Medicine and Genomics(LMMGe) / 3. Center for Research in Pure and Applied Mathematics (CRMPA) | Giorgio Giurato et al                        |
| EPI_ISL_918417 | 1.AO Universitaria 'S. Giovanni di Dio e Ruggi D'Aragona, Scuola Medica Salernitana' Hospital / 2.UOC di Virologia e Microbiologia, Università della Campania 'L. Vanvitelli' / 3.AO Universitaria 'Federico II' Napoli Hospital / 4.AORN 'San Giuseppe Moscati' Avellino Hospital / 5.AO 'San Pio - presidio G. Rummo' Benevento Hospital / 6.AO 'Sant'Anna e San Sebastiano' Caserta Hospital / 7.PO 'Maria Santissima Addolorata' Eboli Hospital / 8.Biogem Istituto di Ricerche Genetiche | 1. Genome Research Center for Health (CRGS) / 2. Laboratory of Molecular Medicine and Genomics(LMMGe) / 3. Center for Research in Pure and Applied Mathematics (CRMPA) | Giorgio Giurato (Corresponding Author) et al |
| EPI_ISL_876972 | 1.AO Universitaria 'S. Giovanni di Dio e Ruggi D'Aragona, Scuola Medica Salernitana' Hospital / 2.UOC di Virologia e Microbiologia, Università della Campania 'L. Vanvitelli' / 3.AO Universitaria 'Federico II' Napoli Hospital / 4.AORN 'San Giuseppe Moscati' Avellino Hospital / 5.AO 'San Pio - presidio G. Rummo' Benevento Hospital / 6.AO 'Sant'Anna e San Sebastiano' Caserta Hospital / 7.PO 'Maria Santissima Addolorata' Eboli Hospital / 8.Biogem Istituto di Ricerche Genetiche | 1. Genome Research Center for Health (CRGS) / 2. Laboratory of Molecular Medicine and Genomics(LMMGe) / 3. Center for Research in Pure and Applied Mathematics (CRMPA) | Giorgio Giurato (Corresponding Author) et al |
| EPI_ISL_918479 | 1.AO Universitaria 'S. Giovanni di Dio e Ruggi D'Aragona, Scuola Medica Salernitana' Hospital / 2.UOC di Virologia e Microbiologia, Università della Campania 'L. Vanvitelli' / 3.AO Universitaria 'Federico II' Napoli Hospital / 4.AORN 'San Giuseppe Moscati' Avellino Hospital / 5.AO 'San Pio - presidio G. Rummo' Benevento Hospital / 6.AO 'Sant'Anna e San Sebastiano' Caserta Hospital / 7.PO 'Maria Santissima Addolorata' Eboli Hospital / 8.Biogem Istituto di Ricerche Genetiche | 1. Genome Research Center for Health (CRGS) / 2. Laboratory of Molecular Medicine and Genomics(LMMGe) / 3. Center for Research in Pure and Applied Mathematics (CRMPA) | Giorgio Giurato (Corresponding Author) et al |
| EPI_ISL_877025 | 1.AO Universitaria 'S. Giovanni di Dio e Ruggi D'Aragona, Scuola Medica Salernitana' Hospital / 2.UOC di Virologia e Microbiologia, Università della Campania 'L. Vanvitelli' / 3.AO Universitaria 'Federico II' Napoli Hospital / 4.AORN 'San Giuseppe Moscati' Avellino Hospital / 5.AO 'San Pio - presidio G. Rummo' Benevento Hospital / 6.AO 'Sant'Anna e San Sebastiano' Caserta Hospital / 7.PO 'Maria Santissima Addolorata' Eboli Hospital / 8.Biogem Istituto di Ricerche Genetiche | 1. Genome Research Center for Health (CRGS) / 2. Laboratory of Molecular Medicine and Genomics(LMMGe) / 3. Center for Research in Pure and Applied Mathematics (CRMPA) | Giorgio Giurato (Corresponding Author) et al |
| EPI_ISL_738128 | IZSM-U.O.C. Virologia                                                                                                                                                                                                                                                                                                                                                                                                                                                                         | Istituto Zooprofilattico Sperimentale del Mezzogiorno                                                                                                                  | Maurizio Viscardi et al                      |
| EPI_ISL_837296 | Istituto Zooprofilattico Sperimentale del Mezzogiorno                                                                                                                                                                                                                                                                                                                                                                                                                                         | TIGEM                                                                                                                                                                  | Patrizia Annunziata et al                    |
| EPI_ISL_837301 | Istituto Zooprofilattico Sperimentale del Mezzogiorno                                                                                                                                                                                                                                                                                                                                                                                                                                         | TIGEM                                                                                                                                                                  | Patrizia Annunziata et al                    |
| EPI_ISL_837315 | Istituto Zooprofilattico Sperimentale del Mezzogiorno                                                                                                                                                                                                                                                                                                                                                                                                                                         | TIGEM                                                                                                                                                                  | Patrizia Annunziata et al                    |
| EPI_ISL_837312 | Istituto Zooprofilattico Sperimentale del Mezzogiorno                                                                                                                                                                                                                                                                                                                                                                                                                                         | TIGEM                                                                                                                                                                  | Patrizia Annunziata et al                    |

|                |                                                                                                                                                                                                          |                                          |                           |
|----------------|----------------------------------------------------------------------------------------------------------------------------------------------------------------------------------------------------------|------------------------------------------|---------------------------|
| EPI_ISL_736864 | Istituto Zooprofilattico Sperimentale del Mezzogiorno                                                                                                                                                    | TIGEM                                    | Patrizia Annunziata et al |
| EPI_ISL_960485 | Istituto Zooprofilattico Sperimentale del Mezzogiorno                                                                                                                                                    | TIGEM                                    | Patrizia Annunziata et al |
| EPI_ISL_776897 | Istituto Zooprofilattico Sperimentale del Mezzogiorno                                                                                                                                                    | TIGEM                                    | Patrizia Annunziata et al |
| EPI_ISL_776898 | Istituto Zooprofilattico Sperimentale del Mezzogiorno                                                                                                                                                    | TIGEM                                    | Patrizia Annunziata et al |
| EPI_ISL_776956 | Istituto Zooprofilattico Sperimentale del Mezzogiorno                                                                                                                                                    | TIGEM                                    | Patrizia Annunziata et al |
| EPI_ISL_776952 | Istituto Zooprofilattico Sperimentale del Mezzogiorno                                                                                                                                                    | TIGEM                                    | Patrizia Annunziata et al |
| EPI_ISL_776926 | Istituto Zooprofilattico Sperimentale del Mezzogiorno                                                                                                                                                    | TIGEM                                    | Patrizia Annunziata et al |
| EPI_ISL_776933 | Istituto Zooprofilattico Sperimentale del Mezzogiorno                                                                                                                                                    | TIGEM                                    | Patrizia Annunziata et al |
| EPI_ISL_776989 | Istituto Zooprofilattico Sperimentale del Mezzogiorno                                                                                                                                                    | TIGEM                                    | Patrizia Annunziata et al |
| EPI_ISL_776977 | Istituto Zooprofilattico Sperimentale del Mezzogiorno                                                                                                                                                    | TIGEM                                    | Patrizia Annunziata et al |
| EPI_ISL_776984 | Istituto Zooprofilattico Sperimentale del Mezzogiorno                                                                                                                                                    | TIGEM                                    | Patrizia Annunziata et al |
| EPI_ISL_778762 | Istituto Zooprofilattico Sperimentale del Mezzogiorno                                                                                                                                                    | TIGEM                                    | Patrizia Annunziata et al |
| EPI_ISL_778682 | Istituto Zooprofilattico Sperimentale del Mezzogiorno                                                                                                                                                    | TIGEM                                    | Patrizia Annunziata et al |
| EPI_ISL_833564 | Istituto Zooprofilattico Sperimentale del Mezzogiorno                                                                                                                                                    | TIGEM                                    | Patrizia Annunziata et al |
| EPI_ISL_833551 | Istituto Zooprofilattico Sperimentale del Mezzogiorno                                                                                                                                                    | TIGEM                                    | Patrizia Annunziata et al |
| EPI_ISL_833455 | SC (UCO) Igiene e Sanità Pubblica (funzione integrata con SC Microbiologia e Virologia) e Laboratory of Molecular Virology of the International Centre for Genetic Engineering and Biotechnology (ICGEB) | ARGO Laboratorio Genomica ed Epigenomica | Licastro D et al          |
| EPI_ISL_833454 | SC (UCO) Igiene e Sanità Pubblica (funzione integrata con SC Microbiologia e Virologia) e Laboratory of Molecular Virology of the International Centre for Genetic Engineering and Biotechnology (ICGEB) | ARGO Laboratorio Genomica ed Epigenomica | Licastro D et al          |
| EPI_ISL_833453 | SC (UCO) Igiene e Sanità Pubblica (funzione integrata con SC Microbiologia e Virologia) e Laboratory of Molecular Virology of the International Centre for Genetic Engineering and Biotechnology (ICGEB) | ARGO Laboratorio Genomica ed Epigenomica | Licastro D et al          |
| EPI_ISL_833452 | SC (UCO) Igiene e Sanità Pubblica (funzione integrata con SC Microbiologia e Virologia) e Laboratory of Molecular Virology of the International Centre for Genetic Engineering and Biotechnology (ICGEB) | ARGO Laboratorio Genomica ed Epigenomica | Licastro D et al          |
| EPI_ISL_833451 | SC (UCO) Igiene e Sanità Pubblica (funzione integrata con SC Microbiologia e Virologia) e Laboratory of Molecular Virology of the International Centre for Genetic Engineering and Biotechnology (ICGEB) | ARGO Laboratorio Genomica ed Epigenomica | Licastro D et al          |
| EPI_ISL_833450 | SC (UCO) Igiene e Sanità Pubblica (funzione integrata con SC Microbiologia e Virologia) e Laboratory of Molecular Virology of the International Centre for Genetic Engineering and Biotechnology (ICGEB) | ARGO Laboratorio Genomica ed Epigenomica | Licastro D et al          |
| EPI_ISL_833449 | SC (UCO) Igiene e Sanità Pubblica (funzione integrata con SC Microbiologia e Virologia) e Laboratory of Molecular Virology of the International Centre for Genetic Engineering and Biotechnology (ICGEB) | ARGO Laboratorio Genomica ed Epigenomica | Licastro D et al          |
| EPI_ISL_833448 | SC (UCO) Igiene e Sanità Pubblica (funzione integrata con SC Microbiologia e Virologia) e Laboratory of Molecular Virology of the International Centre for Genetic Engineering and Biotechnology (ICGEB) | ARGO Laboratorio Genomica ed Epigenomica | Licastro D et al          |

|                |                                                                                                                                                                                                                                                                                      |                                                                                        |                             |
|----------------|--------------------------------------------------------------------------------------------------------------------------------------------------------------------------------------------------------------------------------------------------------------------------------------|----------------------------------------------------------------------------------------|-----------------------------|
| EPI_ISL_833440 | SC (UCO) Igiene e Sanità Pubblica (funzione integrata con SC Microbiologia e Virologia) e Laboratory of Molecular Virology of the International Centre for Genetic Engineering and Biotechnology (ICGEB)                                                                             | ARGO Laboratorio Genomica ed Epigenomica                                               | Licastro D et al            |
| EPI_ISL_882635 | SC (UCO) Igiene e Sanità Pubblica (funzione integrata con SC Microbiologia e Virologia) e Laboratory of Molecular Virology of the International Centre for Genetic Engineering and Biotechnology (ICGEB)                                                                             | ARGO Laboratorio Genomica ed Epigenomica                                               | Licastro D et al            |
| EPI_ISL_833438 | SC (UCO) Igiene e Sanità Pubblica (funzione integrata con SC Microbiologia e Virologia) e Laboratory of Molecular Virology of the International Centre for Genetic Engineering and Biotechnology (ICGEB)                                                                             | ARGO Laboratorio Genomica ed Epigenomica                                               | Licastro D et al            |
| EPI_ISL_833437 | SC (UCO) Igiene e Sanità Pubblica (funzione integrata con SC Microbiologia e Virologia) e Laboratory of Molecular Virology of the International Centre for Genetic Engineering and Biotechnology (ICGEB)                                                                             | ARGO Laboratorio Genomica ed Epigenomica                                               | Licastro D et al            |
| EPI_ISL_525496 | Laboratory of Molecular Virology of the International Centre for Genetic Engineering and Biotechnology (ICGEB)                                                                                                                                                                       | ARGO Open Lab Platform for Genome Sequencing                                           | Licastro D et al            |
| EPI_ISL_498563 | Laboratory of Molecular Virology International Center for Genetic Engineering and Biotechnology (ICGEB)                                                                                                                                                                              | ARGO Open Lab Platform for Genome Sequencing                                           | Licastro D et al            |
| EPI_ISL_417423 | Laboratory of Molecular Virology International Center for Genetic Engineering and Biotechnology (ICGEB)                                                                                                                                                                              | ARGO Open Lab Platform for Genome sequencing                                           | Licastro D et al            |
| EPI_ISL_875687 | Department of Infectious Diseases, Istituto Superiore di Sanità, Rome, Italy; UCO Igiene e Sanità Pubblica, ASUGI, Trieste, Italy; Laboratorio di Genomica ed Epigenomica sistema Argo, Area SciencePark, Trieste, Italy; Laboratorio di Virologia Molecolare, ICGEB, Trieste, Italy | Istituto Superiore di Sanità (ISS)                                                     | Paola Stefanelli et al      |
| EPI_ISL_877765 | UCO Igiene e Sanità Pubblica, ASUGI, Trieste, Italy; Laboratorio di Virologia Molecolare, ICGEB, Trieste, Italy                                                                                                                                                                      | Laboratorio di Genomica ed Epigenomica sistema Argo, Area SciencePark, Trieste, Italy; | Pierlanfranco D'Agaro et al |
| EPI_ISL_803898 | National Institute for Infectious Diseases, INMI, "L. Spallanzani" IRCCS                                                                                                                                                                                                             | National Institute for Infectious Diseases, INMI, "L. Spallanzani" IRCCS               | C.E.M Gruber et al          |
| EPI_ISL_590696 | INMI Lazzaro Spallanzani IRCCS                                                                                                                                                                                                                                                       | INMI Lazzaro Spallanzani IRCCS                                                         | Cesare E.M. Gruber et al    |
| EPI_ISL_941336 | Ospedale San Camillo De Lellis di Rieti                                                                                                                                                                                                                                              | INMI Lazzaro Spallanzani IRCCS                                                         | Cesare E.M. Gruber et al    |
| EPI_ISL_941337 | Ospedale San Camillo De Lellis di Rieti                                                                                                                                                                                                                                              | INMI Lazzaro Spallanzani IRCCS                                                         | Ornella Butera et al        |
| EPI_ISL_590697 | INMI Lazzaro Spallanzani IRCCS                                                                                                                                                                                                                                                       | INMI Lazzaro Spallanzani IRCCS                                                         | Martina Rueca et al         |
| EPI_ISL_603143 | INMI Lazzaro Spallanzani IRCCS                                                                                                                                                                                                                                                       | INMI Lazzaro Spallanzani IRCCS                                                         | Martina Rueca et al         |
| EPI_ISL_603144 | INMI Lazzaro Spallanzani IRCCS                                                                                                                                                                                                                                                       | INMI Lazzaro Spallanzani IRCCS                                                         | Cesare E.M. Gruber et al    |
| EPI_ISL_603147 | INMI Lazzaro Spallanzani IRCCS                                                                                                                                                                                                                                                       | INMI Lazzaro Spallanzani IRCCS                                                         | Cesare E.M. Gruber et al    |
| EPI_ISL_603149 | INMI Lazzaro Spallanzani IRCCS                                                                                                                                                                                                                                                       | INMI Lazzaro Spallanzani IRCCS                                                         | Francesco Messina et al     |
| EPI_ISL_603154 | INMI Lazzaro Spallanzani IRCCS                                                                                                                                                                                                                                                       | INMI Lazzaro Spallanzani IRCCS                                                         | Martina Rueca et al         |
| EPI_ISL_603155 | INMI Lazzaro Spallanzani IRCCS                                                                                                                                                                                                                                                       | INMI Lazzaro Spallanzani IRCCS                                                         | Martina Rueca et al         |
| EPI_ISL_603157 | INMI Lazzaro Spallanzani IRCCS                                                                                                                                                                                                                                                       | INMI Lazzaro Spallanzani IRCCS                                                         | Francesco Messina et al     |
| EPI_ISL_603158 | INMI Lazzaro Spallanzani IRCCS                                                                                                                                                                                                                                                       | INMI Lazzaro Spallanzani IRCCS                                                         | Barbara Bartolini et al     |
| EPI_ISL_609989 | INMI Lazzaro Spallanzani IRCCS                                                                                                                                                                                                                                                       | INMI Lazzaro Spallanzani IRCCS                                                         | C.E.M Gruber et al          |
| EPI_ISL_412974 | Department of Infectious Diseases, Istituto Superiore di Sanità, Rome, Italy                                                                                                                                                                                                         | Virology Laboratory, Scientific Department, Army Medical Center                        | Paola Stefanelli et al      |
| EPI_ISL_410546 | INMI Lazzaro Spallanzani IRCCS                                                                                                                                                                                                                                                       | Laboratory of Virology, INMI Lazzaro Spallanzani IRCCS                                 | Maria R. Capobianchi et al  |
| EPI_ISL_410545 | INMI Lazzaro Spallanzani IRCCS                                                                                                                                                                                                                                                       | Laboratory of Virology, INMI Lazzaro Spallanzani IRCCS                                 | Maria R. Capobianchi et al  |

|                |                                                                                                                                                          |                                                                                                                                                                                |                                                      |
|----------------|----------------------------------------------------------------------------------------------------------------------------------------------------------|--------------------------------------------------------------------------------------------------------------------------------------------------------------------------------|------------------------------------------------------|
| EPI_ISL_451302 | Laboratory of Virology, INMI Lazzaro Spallanzani IRCCS<br>Molecular Virology Unit, Fondazione IRCCS Policlinico San Matteo ,<br>Pavia                    | Laboratory of Virology, INMI Lazzaro Spallanzani IRCCS                                                                                                                         | Cesare E.M. Gruber et al                             |
| EPI_ISL_460085 | Molecular Virology Unit, Fondazione IRCCS Policlinico San Matteo ,<br>Pavia                                                                              | Laboratory of Virology, INMI Lazzaro Spallanzani IRCCS                                                                                                                         | Cesare E.M. Gruber et al                             |
| EPI_ISL_451306 | Molecular Virology Unit, Fondazione IRCCS Policlinico San Matteo ,<br>Pavia                                                                              | Laboratory of Virology, INMI Lazzaro Spallanzani IRCCS                                                                                                                         | Antonio Piralla et al                                |
| EPI_ISL_460091 | Molecular Virology Unit, Fondazione IRCCS Policlinico San Matteo ,<br>Pavia                                                                              | Laboratory of Virology, INMI Lazzaro Spallanzani IRCCS                                                                                                                         | Antonino Di Caro et al                               |
| EPI_ISL_460087 | Molecular Virology Unit, Fondazione IRCCS Policlinico San Matteo ,<br>Pavia                                                                              | Laboratory of Virology, INMI Lazzaro Spallanzani IRCCS                                                                                                                         | Cesare E.M. Gruber et al                             |
| EPI_ISL_460089 | Molecular Virology Unit, Fondazione IRCCS Policlinico San Matteo ,<br>Pavia                                                                              | Laboratory of Virology, INMI Lazzaro Spallanzani IRCCS                                                                                                                         | Antonino Di Caro et al                               |
| EPI_ISL_542246 | ASST GOM Niguarda<br>Laboratory of Infectious Diseases, Department of Biomedical and<br>Clinical Sciences L. Sacco, University of Milan                  | Dep. Of Oncology and Hemato-Oncology University of Milan<br>Laboratory of Infectious Diseases, Department of Biomedical and<br>Clinical Sciences L. Sacco, University of Milan | Claudia Alteri et al<br>Gianguglielmo Zehender et al |
| EPI_ISL_417447 | Laboratorio Biologia Molecolare Sars Cov2 - UOC Laboratorio Analisi<br>- Servizio Medicina di Laboratorio, Ospedale "San Francesco" - ATS-<br>ASSL Nuoro | Laboratorio specialistico UOC Ematologia - Ospedale "San<br>Francesco" - ATS-ASSL Nuoro                                                                                        | Piras Giovanna et al                                 |
| EPI_ISL_613955 | Molecular Biology, IZS Sicilia                                                                                                                           | Molecular Biology, IZS Sicilia                                                                                                                                                 | Reale et al                                          |
| EPI_ISL_849763 | ULSS 7 Pedemontana - Distretto 2                                                                                                                         | Istituto Zooprofilattico Sperimentale delle Venezie                                                                                                                            | Adelaide Milani et al                                |
| EPI_ISL_794827 | Microbiologia e Virologia                                                                                                                                | Istituto Zooprofilattico Sperimentale delle Venezie                                                                                                                            | Adelaide Milani et al                                |
| EPI_ISL_977171 | Microbiologia e Virologia                                                                                                                                | Istituto Zooprofilattico Sperimentale delle Venezie                                                                                                                            | Adelaide Milani et al                                |
| EPI_ISL_977172 | ULSS 2 Treviso                                                                                                                                           | Istituto Zooprofilattico Sperimentale delle Venezie                                                                                                                            | Adelaide Milani et al                                |
| EPI_ISL_977191 | Microbiologia e Virologia                                                                                                                                | Istituto Zooprofilattico Sperimentale delle Venezie                                                                                                                            | Adelaide Milani et al                                |
| EPI_ISL_977246 | IRCCS Sacro Cuore Don Calabria Hospital, Department of Infectious,<br>Tropical Diseases & Microbiology                                                   | University of Verona, Department of Biotechnology                                                                                                                              | Antonio Mori et al                                   |
| EPI_ISL_751409 | IRCCS Sacro Cuore Don Calabria Hospital, Department of Infectious,<br>Tropical Diseases & Microbiology                                                   | University of Verona, Department of Biotechnology                                                                                                                              | Antonio Mori et al                                   |
| EPI_ISL_751412 | IRCCS Sacro Cuore Don Calabria Hospital, Department of Infectious,<br>Tropical Diseases & Microbiology                                                   | University of Verona, Department of Biotechnology                                                                                                                              | Antonio Mori et al                                   |
| EPI_ISL_751331 | IRCCS Sacro Cuore Don Calabria Hospital, Department of Infectious,<br>Tropical Diseases & Microbiology                                                   | University of Verona, Department of Biotechnology                                                                                                                              | Antonio Mori et al                                   |
| EPI_ISL_751323 | IRCCS Sacro Cuore Don Calabria Hospital, Department of Infectious,<br>Tropical Diseases & Microbiology                                                   | University of Verona, Department of Biotechnology                                                                                                                              | Antonio Mori et al                                   |
| EPI_ISL_751324 | IRCCS Sacro Cuore Don Calabria Hospital, Department of Infectious,<br>Tropical Diseases & Microbiology                                                   | University of Verona, Department of Biotechnology                                                                                                                              | Antonio Mori et al                                   |
| EPI_ISL_751389 | IRCCS Sacro Cuore Don Calabria Hospital, Department of Infectious,<br>Tropical Diseases & Microbiology                                                   | University of Verona, Department of Biotechnology                                                                                                                              | Antonio Mori et al                                   |
| EPI_ISL_756367 | The Caribbean Public Health Agency                                                                                                                       | Carrington Lab, Department of PreClinical Sciences, Faculty of<br>Medical Sciences, The University of the West Indies                                                          | Nikita S. D. Sahadeo et al                           |
| EPI_ISL_450792 | Jamaica Ministry of Health and Wellness                                                                                                                  | Pathogen Discovery, Respiratory Viruses Branch, Division of<br>Viral Diseases, Centers for Disease Control and Prevention                                                      | Krista Queen et al                                   |
| EPI_ISL_450793 | Jamaica Ministry of Health and Wellness                                                                                                                  | Pathogen Discovery, Respiratory Viruses Branch, Division of<br>Viral Diseases, Centers for Disease Control and Prevention                                                      | Yan Li et al                                         |
| EPI_ISL_450795 | Jamaica Ministry of Health and Wellness                                                                                                                  | Pathogen Discovery, Respiratory Viruses Branch, Division of<br>Viral Diseases, Centers for Disease Control and Prevention                                                      | Yan Li et al                                         |
| EPI_ISL_450796 | Jamaica Ministry of Health and Wellness                                                                                                                  | Pathogen Discovery, Respiratory Viruses Branch, Division of<br>Viral Diseases, Centers for Disease Control and Prevention                                                      | Yan Li et al                                         |
| EPI_ISL_450797 | Jamaica Ministry of Health and Wellness                                                                                                                  | Pathogen Discovery, Respiratory Viruses Branch, Division of<br>Viral Diseases, Centers for Disease Control and Prevention                                                      | Yan Li et al                                         |
| EPI_ISL_450798 | Jamaica Ministry of Health and Wellness                                                                                                                  | Pathogen Discovery, Respiratory Viruses Branch, Division of<br>Viral Diseases, Centers for Disease Control and Prevention                                                      | Krista Queen et al                                   |

|                |                                                                       |                                                                                                                           |                         |
|----------------|-----------------------------------------------------------------------|---------------------------------------------------------------------------------------------------------------------------|-------------------------|
| EPI_ISL_450799 | Jamaica Ministry of Health and Wellness                               | Pathogen Discovery, Respiratory Viruses Branch, Division of<br>Viral Diseases, Centers for Disease Control and Prevention | Yan Li et al            |
| EPI_ISL_407084 | Department of Virology III, National Institute of Infectious Diseases | Pathogen Genomics Center, National Institute of Infectious Diseases                                                       | Tsuyoshi Sekizuka et al |
| EPI_ISL_416569 | Japanese Quarantine Stations                                          | Pathogen Genomics Center, National Institute of Infectious Diseases                                                       | Tsuyoshi Sekizuka et al |
| EPI_ISL_416572 | Japanese Quarantine Stations                                          | Pathogen Genomics Center, National Institute of Infectious Diseases                                                       | Tsuyoshi Sekizuka et al |
| EPI_ISL_416573 | Japanese Quarantine Stations                                          | Pathogen Genomics Center, National Institute of Infectious Diseases                                                       | Tsuyoshi Sekizuka et al |
| EPI_ISL_416575 | Japanese Quarantine Stations                                          | Pathogen Genomics Center, National Institute of Infectious Diseases                                                       | Tsuyoshi Sekizuka et al |
| EPI_ISL_416576 | Japanese Quarantine Stations                                          | Pathogen Genomics Center, National Institute of Infectious Diseases                                                       | Tsuyoshi Sekizuka et al |
| EPI_ISL_416577 | Japanese Quarantine Stations                                          | Pathogen Genomics Center, National Institute of Infectious Diseases                                                       | Tsuyoshi Sekizuka et al |
| EPI_ISL_416580 | Japanese Quarantine Stations                                          | Pathogen Genomics Center, National Institute of Infectious Diseases                                                       | Tsuyoshi Sekizuka et al |
| EPI_ISL_416586 | Japanese Quarantine Stations                                          | Pathogen Genomics Center, National Institute of Infectious Diseases                                                       | Tsuyoshi Sekizuka et al |
| EPI_ISL_416592 | Japanese Quarantine Stations                                          | Pathogen Genomics Center, National Institute of Infectious Diseases                                                       | Tsuyoshi Sekizuka et al |
| EPI_ISL_416595 | Japanese Quarantine Stations                                          | Pathogen Genomics Center, National Institute of Infectious Diseases                                                       | Tsuyoshi Sekizuka et al |
| EPI_ISL_416606 | Japanese Quarantine Stations                                          | Pathogen Genomics Center, National Institute of Infectious Diseases                                                       | Tsuyoshi Sekizuka et al |
| EPI_ISL_416631 | Japanese Quarantine Stations                                          | Pathogen Genomics Center, National Institute of Infectious Diseases                                                       | Tsuyoshi Sekizuka et al |
| EPI_ISL_416634 | Japanese Quarantine Stations                                          | Pathogen Genomics Center, National Institute of Infectious Diseases                                                       | Tsuyoshi Sekizuka et al |
| EPI_ISL_860127 | Keio University School of Medicine                                    | Keio University School of Medicine                                                                                        | Kenjiro Kosaki et al    |
| EPI_ISL_860128 | Keio University School of Medicine                                    | Keio University School of Medicine                                                                                        | Kenjiro Kosaki et al    |
| EPI_ISL_860130 | Keio University School of Medicine                                    | Keio University School of Medicine                                                                                        | Kenjiro Kosaki et al    |
| EPI_ISL_860133 | Keio University School of Medicine                                    | Keio University School of Medicine                                                                                        | Kenjiro Kosaki et al    |
| EPI_ISL_860136 | Keio University School of Medicine                                    | Keio University School of Medicine                                                                                        | Kenjiro Kosaki et al    |
| EPI_ISL_860151 | Keio University School of Medicine                                    | Keio University School of Medicine                                                                                        | Kenjiro Kosaki et al    |
| EPI_ISL_860153 | Keio University School of Medicine                                    | Keio University School of Medicine                                                                                        | Kenjiro Kosaki et al    |
| EPI_ISL_860161 | Keio University School of Medicine                                    | Keio University School of Medicine                                                                                        | Kenjiro Kosaki et al    |
| EPI_ISL_860180 | Keio University School of Medicine                                    | Keio University School of Medicine                                                                                        | Kenjiro Kosaki et al    |
| EPI_ISL_915366 | Keio University School of Medicine                                    | Keio University School of Medicine                                                                                        | Kenjiro Kosaki et al    |
| EPI_ISL_915372 | Keio University School of Medicine                                    | Keio University School of Medicine                                                                                        | Kenjiro Kosaki et al    |
| EPI_ISL_915374 | Keio University School of Medicine                                    | Keio University School of Medicine                                                                                        | Kenjiro Kosaki et al    |
| EPI_ISL_915382 | Keio University School of Medicine                                    | Keio University School of Medicine                                                                                        | Kenjiro Kosaki et al    |
| EPI_ISL_915383 | Keio University School of Medicine                                    | Keio University School of Medicine                                                                                        | Kenjiro Kosaki et al    |
| EPI_ISL_915401 | Keio University School of Medicine                                    | Keio University School of Medicine                                                                                        | Kenjiro Kosaki et al    |
| EPI_ISL_915405 | Keio University School of Medicine                                    | Keio University School of Medicine                                                                                        | Kenjiro Kosaki et al    |
| EPI_ISL_915411 | Keio University School of Medicine                                    | Keio University School of Medicine                                                                                        | Kenjiro Kosaki et al    |
| EPI_ISL_469287 | Keio University Hospital                                              | Keio University Hospital                                                                                                  | Kenjiro Kosaki et al    |
| EPI_ISL_469288 | Keio University Hospital                                              | Keio University Hospital                                                                                                  | Kenjiro Kosaki et al    |
| EPI_ISL_469290 | Keio University Hospital                                              | Keio University Hospital                                                                                                  | Kenjiro Kosaki et al    |
| EPI_ISL_469291 | Keio University Hospital                                              | Keio University Hospital                                                                                                  | Kenjiro Kosaki et al    |
| EPI_ISL_469292 | Keio University Hospital                                              | Keio University Hospital                                                                                                  | Kenjiro Kosaki et al    |
| EPI_ISL_469294 | Keio University Hospital                                              | Keio University Hospital                                                                                                  | Kenjiro Kosaki et al    |
| EPI_ISL_469295 | Keio University Hospital                                              | Keio University Hospital                                                                                                  | Kenjiro Kosaki et al    |







|                |                                                                                                        |                                                                                |                         |
|----------------|--------------------------------------------------------------------------------------------------------|--------------------------------------------------------------------------------|-------------------------|
| EPI_ISL_637020 | Department of Infectious Diseases and Immunology, National Hospital Organization Nagoya Medical Center | Clinical Research Center, National Hospital Organization Nagoya Medical Center | Yoshihiro Nakata et al  |
| EPI_ISL_637021 | Department of Infectious Diseases and Immunology, National Hospital Organization Nagoya Medical Center | Clinical Research Center, National Hospital Organization Nagoya Medical Center | Yoshihiro Nakata et al  |
| EPI_ISL_918169 | Department of Infectious Diseases and Immunology, National Hospital Organization Nagoya Medical Center | Clinical Research Center, National Hospital Organization Nagoya Medical Center | Yoshihiro Nakata et al  |
| EPI_ISL_918170 | Department of Infectious Diseases and Immunology, National Hospital Organization Nagoya Medical Center | Clinical Research Center, National Hospital Organization Nagoya Medical Center | Yoshihiro Nakata et al  |
| EPI_ISL_918171 | Department of Infectious Diseases and Immunology, National Hospital Organization Nagoya Medical Center | Clinical Research Center, National Hospital Organization Nagoya Medical Center | Yoshihiro Nakata et al  |
| EPI_ISL_918174 | Department of Infectious Diseases and Immunology, National Hospital Organization Nagoya Medical Center | Clinical Research Center, National Hospital Organization Nagoya Medical Center | Yoshihiro Nakata et al  |
| EPI_ISL_918176 | Department of Infectious Diseases and Immunology, National Hospital Organization Nagoya Medical Center | Clinical Research Center, National Hospital Organization Nagoya Medical Center | Yoshihiro Nakata et al  |
| EPI_ISL_410532 | Dept. of Pathology, National Institute of Infectious Diseases                                          | Pathogen Genomics Center, National Institute of Infectious Diseases            | Tsuyoshi Sekizuka et al |
| EPI_ISL_479799 | Sapporo City Institute of Public Health                                                                | Pathogen Genomics Center, National Institute of Infectious Diseases            | Tsuyoshi Sekizuka et al |
| EPI_ISL_479800 | Sapporo City Institute of Public Health                                                                | Pathogen Genomics Center, National Institute of Infectious Diseases            | Tsuyoshi Sekizuka et al |
| EPI_ISL_479961 | Tokyo Metropolitan Institute of Public Health                                                          | Pathogen Genomics Center, National Institute of Infectious Diseases            | Tsuyoshi Sekizuka et al |
| EPI_ISL_479972 | Fukui Prefectural Institute of Public Health and Environmental Science                                 | Pathogen Genomics Center, National Institute of Infectious Diseases            | Tsuyoshi Sekizuka et al |
| EPI_ISL_480033 | Tochigi Prefectural Institute of Public Health and Environmental Science                               | Pathogen Genomics Center, National Institute of Infectious Diseases            | Tsuyoshi Sekizuka et al |
| EPI_ISL_480037 | Tochigi Prefectural Institute of Public Health and Environmental Science                               | Pathogen Genomics Center, National Institute of Infectious Diseases            | Tsuyoshi Sekizuka et al |
| EPI_ISL_480066 | Sakai City Institute of Public Health                                                                  | Pathogen Genomics Center, National Institute of Infectious Diseases            | Tsuyoshi Sekizuka et al |
| EPI_ISL_480097 | Department of Infectious Diseases, Kobe Institute of Health                                            | Pathogen Genomics Center, National Institute of Infectious Diseases            | Tsuyoshi Sekizuka et al |
| EPI_ISL_480108 | Koshigaya City Public Health Center                                                                    | Pathogen Genomics Center, National Institute of Infectious Diseases            | Tsuyoshi Sekizuka et al |
| EPI_ISL_480124 | Fukui Prefectural Institute of Public Health and Environmental Science                                 | Pathogen Genomics Center, National Institute of Infectious Diseases            | Tsuyoshi Sekizuka et al |
| EPI_ISL_480128 | Fukui Prefectural Institute of Public Health and Environmental Science                                 | Pathogen Genomics Center, National Institute of Infectious Diseases            | Tsuyoshi Sekizuka et al |
| EPI_ISL_480133 | Fukui Prefectural Institute of Public Health and Environmental Science                                 | Pathogen Genomics Center, National Institute of Infectious Diseases            | Tsuyoshi Sekizuka et al |
| EPI_ISL_480216 | Department of Infectious Diseases, Kobe Institute of Health                                            | Pathogen Genomics Center, National Institute of Infectious Diseases            | Tsuyoshi Sekizuka et al |
| EPI_ISL_408665 | Dept. of Virology III, National Institute of Infectious Diseases                                       | Pathogen Genomics Center, National Institute of Infectious Diseases            | Tsuyoshi Sekizuka et al |
| EPI_ISL_408666 | Dept. of Virology III, National Institute of Infectious Diseases                                       | Pathogen Genomics Center, National Institute of Infectious Diseases            | Tsuyoshi Sekizuka et al |
| EPI_ISL_408667 | Dept. of Virology III, National Institute of Infectious Diseases                                       | Pathogen Genomics Center, National Institute of Infectious Diseases            | Tsuyoshi Sekizuka et al |
| EPI_ISL_978917 | Genome Analysis Center, Yamanashi Central Hospital                                                     | Genome Analysis Center, Yamanashi Central Hospital                             | Yosuke Hirotsu et al    |
| EPI_ISL_635778 | Biolab Diagnostic Laboratories                                                                         | Andersen lab at Scripps Research                                               | Issa Abu-Dayyeh et al   |
| EPI_ISL_635781 | Biolab Diagnostic Laboratories                                                                         | Andersen lab at Scripps Research                                               | Issa Abu-Dayyeh et al   |
| EPI_ISL_635782 | Biolab Diagnostic Laboratories                                                                         | Andersen lab at Scripps Research                                               | Issa Abu-Dayyeh et al   |
| EPI_ISL_730266 | Biolab Diagnostic Laboratories                                                                         | Andersen lab at Scripps Research                                               | Issa Abu-Dayyeh et al   |
| EPI_ISL_730282 | Biolab Diagnostic Laboratories                                                                         | Andersen lab at Scripps Research                                               | Issa Abu-Dayyeh et al   |
| EPI_ISL_730393 | Biolab Diagnostic Laboratories                                                                         | Andersen lab at Scripps Research                                               | Issa Abu-Dayyeh et al   |
| EPI_ISL_730518 | Biolab Diagnostic Laboratories                                                                         | Andersen lab at Scripps Research                                               | Issa Abu-Dayyeh et al   |



|                |                                                                                                                 |                                                                                                                                                                                                                                                       |                               |
|----------------|-----------------------------------------------------------------------------------------------------------------|-------------------------------------------------------------------------------------------------------------------------------------------------------------------------------------------------------------------------------------------------------|-------------------------------|
| EPI_ISL_755143 | Biolab Diagnostic Laboratories                                                                                  | Andersen lab at Scripps Research                                                                                                                                                                                                                      | Issa Abu-Dayyeh et al         |
| EPI_ISL_755254 | Biolab Diagnostic Laboratories                                                                                  | Andersen lab at Scripps Research                                                                                                                                                                                                                      | Issa Abu-Dayyeh et al         |
| EPI_ISL_755255 | Biolab Diagnostic Laboratories                                                                                  | Andersen lab at Scripps Research                                                                                                                                                                                                                      | Issa Abu-Dayyeh et al         |
| EPI_ISL_755256 | Biolab Diagnostic Laboratories                                                                                  | Andersen lab at Scripps Research                                                                                                                                                                                                                      | Issa Abu-Dayyeh et al         |
| EPI_ISL_755258 | Biolab Diagnostic Laboratories                                                                                  | Andersen lab at Scripps Research                                                                                                                                                                                                                      | Issa Abu-Dayyeh et al         |
| EPI_ISL_755131 | Biolab Diagnostic Laboratories                                                                                  | Andersen lab at Scripps Research                                                                                                                                                                                                                      | Issa Abu-Dayyeh et al         |
| EPI_ISL_755264 | Biolab Diagnostic Laboratories                                                                                  | Andersen lab at Scripps Research                                                                                                                                                                                                                      | Issa Abu-Dayyeh et al         |
| EPI_ISL_755265 | Biolab Diagnostic Laboratories                                                                                  | Andersen lab at Scripps Research                                                                                                                                                                                                                      | Issa Abu-Dayyeh et al         |
| EPI_ISL_755266 | Biolab Diagnostic Laboratories                                                                                  | Andersen lab at Scripps Research                                                                                                                                                                                                                      | Issa Abu-Dayyeh et al         |
| EPI_ISL_755267 | Biolab Diagnostic Laboratories                                                                                  | Andersen lab at Scripps Research                                                                                                                                                                                                                      | Issa Abu-Dayyeh et al         |
| EPI_ISL_755268 | Biolab Diagnostic Laboratories                                                                                  | Andersen lab at Scripps Research                                                                                                                                                                                                                      | Issa Abu-Dayyeh et al         |
| EPI_ISL_429992 | Biolab Diagnostic Laboratories                                                                                  | Andersen lab at Scripps Research                                                                                                                                                                                                                      | Issa Abu-Dayyeh et al         |
| EPI_ISL_450186 | Biolab Diagnostic Laboratories                                                                                  | Andersen lab at Scripps Research                                                                                                                                                                                                                      | Issa Abu-Dayyeh et al         |
| EPI_ISL_450187 | Biolab Diagnostic Laboratories                                                                                  | Andersen lab at Scripps Research                                                                                                                                                                                                                      | Issa Abu-Dayyeh et al         |
| EPI_ISL_450188 | Biolab Diagnostic Laboratories                                                                                  | Andersen lab at Scripps Research                                                                                                                                                                                                                      | Issa Abu-Dayyeh et al         |
| EPI_ISL_450189 | Biolab Diagnostic Laboratories                                                                                  | Andersen lab at Scripps Research                                                                                                                                                                                                                      | Issa Abu-Dayyeh et al         |
| EPI_ISL_429995 | Biolab Diagnostic Laboratories                                                                                  | Andersen lab at Scripps Research                                                                                                                                                                                                                      | Issa Abu-Dayyeh et al         |
| EPI_ISL_429996 | Biolab Diagnostic Laboratories                                                                                  | Andersen lab at Scripps Research                                                                                                                                                                                                                      | Issa Abu-Dayyeh et al         |
| EPI_ISL_429997 | Biolab Diagnostic Laboratories                                                                                  | Andersen lab at Scripps Research                                                                                                                                                                                                                      | Issa Abu-Dayyeh et al         |
| EPI_ISL_430000 | Biolab Diagnostic Laboratories                                                                                  | Andersen lab at Scripps Research                                                                                                                                                                                                                      | Issa Abu-Dayyeh et al         |
| EPI_ISL_430001 | Biolab Diagnostic Laboratories                                                                                  | Andersen lab at Scripps Research                                                                                                                                                                                                                      | Issa Abu-Dayyeh et al         |
| EPI_ISL_430006 | Biolab Diagnostic Laboratories                                                                                  | Andersen lab at Scripps Research                                                                                                                                                                                                                      | Issa Abu-Dayyeh et al         |
| EPI_ISL_430008 | Biolab Diagnostic Laboratories                                                                                  | Andersen lab at Scripps Research                                                                                                                                                                                                                      | Issa Abu-Dayyeh et al         |
| EPI_ISL_430011 | Biolab Diagnostic Laboratories                                                                                  | Andersen lab at Scripps Research                                                                                                                                                                                                                      | Issa Abu-Dayyeh et al         |
| EPI_ISL_430013 | Biolab Diagnostic Laboratories                                                                                  | Andersen lab at Scripps Research                                                                                                                                                                                                                      | Issa Abu-Dayyeh et al         |
| EPI_ISL_430014 | Biolab Diagnostic Laboratories                                                                                  | Andersen lab at Scripps Research                                                                                                                                                                                                                      | Issa Abu-Dayyeh et al         |
| EPI_ISL_434516 | Biolab Diagnostic Laboratories                                                                                  | Andersen lab at Scripps Research                                                                                                                                                                                                                      | Issa Abu-Dayyeh et al         |
| EPI_ISL_904015 | Molecular Biology and Virology lab, Faculty of Veterinary Medicine, Jordan University of Science and Technology | Molecular Biology and Virology lab, Faculty of Veterinary Medicine, Jordan University of Science and Technology                                                                                                                                       | Mohammad Hussien Alboom et al |
| EPI_ISL_904016 | Molecular Biology and Virology lab, Faculty of Veterinary Medicine, Jordan University of Science and Technology | Molecular Biology and Virology lab, Faculty of Veterinary Medicine, Jordan University of Science and Technology                                                                                                                                       | Mohammad Hussien Alboom et al |
| EPI_ISL_850950 | National Institute for Viral Disease Control and Prevention, China CDC                                          | National Institute for Viral Disease Control and Prevention, China CDC                                                                                                                                                                                | Xiang Zhao et al              |
| EPI_ISL_454497 | RSE "National Center for Biotechnology"                                                                         | RSE "National Center for Biotechnology", National Center of Expertise, Kazakhstan National Center for Biotechnology, Laboratory of molecular-genetic research, National Center of Expertise, Kazakhstan National Center for Biotechnology, Kazakhstan | Alexandr Shevtsov et al       |
| EPI_ISL_454576 | Laboratory of virology, National Center of Expertise                                                            | Laboratory of molecular-genetic research, National Center of Expertise, Kazakhstan National Center for Biotechnology, Kazakhstan                                                                                                                      | Abdaliyev Askar et al         |
| EPI_ISL_454577 | Laboratory of virology, National Center of Expertise                                                            | Laboratory of molecular-genetic research, National Center of Expertise, Kazakhstan National Center for Biotechnology, Kazakhstan                                                                                                                      | Abdaliyev Askar et al         |
| EPI_ISL_454579 | Laboratory of virology, National Center of Expertise                                                            | Laboratory of molecular-genetic research, National Center of Expertise, Kazakhstan National Center for Biotechnology, Kazakhstan                                                                                                                      | Abdaliyev Askar et al         |
| EPI_ISL_454500 | RSE "National Center for Biotechnology"                                                                         | RSE "National Center for Biotechnology", National Center of Expertise, Kazakhstan National Center for Biotechnology, Kazakhstan                                                                                                                       | Alexandr Shevtsov et al       |
| EPI_ISL_454580 | Laboratory of virology, National Center of Expertise                                                            | Laboratory of molecular-genetic research, National Center of Expertise, Kazakhstan National Center for Biotechnology, Kazakhstan                                                                                                                      | Abdaliyev Askar et al         |









|                |                                                                                                                                        |                                                                |                         |
|----------------|----------------------------------------------------------------------------------------------------------------------------------------|----------------------------------------------------------------|-------------------------|
| EPI_ISL_422424 | Jaber Al Ahmad Al Sabah Hospital                                                                                                       | Dasman diabetes Institute                                      | Fahd Al-Mulla et al     |
| EPI_ISL_422427 | JABER AL AHMAD AL SABAH HOSPITAL – KUWAIT CITY<br>Virology laboratory Ministry of Health Kuwait sequenced at Dasman Diabetes Institute | Dasman Diabetes Institute                                      | Fahd Al-Mulla et al     |
| EPI_ISL_416458 | Dasman Diabetes Institute                                                                                                              | Dasman Diabetes Institute                                      | Fahd Al-Mulla et al     |
| EPI_ISL_416542 | Dasman Diabetes Institute                                                                                                              | Dasman Diabetes Institute                                      | Fahd Al-Mulla et al     |
| EPI_ISL_903381 | MOH - Jaber Al-Ahmad Hospital (Innovation Research Laboratory)                                                                         | MOH - Jaber Al-Ahmad Hospital (Innovation Research Laboratory) | Salman Al-Sabah et al   |
| EPI_ISL_903380 | MOH - Jaber Al-Ahmad Hospital (Innovation Research Laboratory)                                                                         | MOH - Jaber Al-Ahmad Hospital (Innovation Research Laboratory) | Salman Al-Sabah et al   |
| EPI_ISL_903389 | MOH - Jaber Al-Ahmad Hospital (Innovation Research Laboratory)                                                                         | MOH - Jaber Al-Ahmad Hospital (Innovation Research Laboratory) | Salman Al-Sabah et al   |
| EPI_ISL_903375 | MOH - Jaber Al-Ahmad Hospital (Innovation Research Laboratory)                                                                         | MOH - Jaber Al-Ahmad Hospital (Innovation Research Laboratory) | Salman Al-Sabah et al   |
| EPI_ISL_903383 | MOH - Jaber Al-Ahmad Hospital (Innovation Research Laboratory)                                                                         | MOH - Jaber Al-Ahmad Hospital (Innovation Research Laboratory) | Salman Al-Sabah et al   |
| EPI_ISL_903376 | MOH - Jaber Al-Ahmad Hospital (Innovation Research Laboratory)                                                                         | MOH - Jaber Al-Ahmad Hospital (Innovation Research Laboratory) | Salman Al-Sabah et al   |
| EPI_ISL_903378 | MOH - Jaber Al-Ahmad Hospital (Innovation Research Laboratory)                                                                         | MOH - Jaber Al-Ahmad Hospital (Innovation Research Laboratory) | Salman Al-Sabah et al   |
| EPI_ISL_903382 | MOH - Jaber Al-Ahmad Hospital (Innovation Research Laboratory)                                                                         | MOH - Jaber Al-Ahmad Hospital (Innovation Research Laboratory) | Salman Al-Sabah et al   |
| EPI_ISL_903388 | MOH - Jaber Al-Ahmad Hospital (Innovation Research Laboratory)                                                                         | MOH - Jaber Al-Ahmad Hospital (Innovation Research Laboratory) | Salman Al-Sabah et al   |
| EPI_ISL_903379 | MOH - Jaber Al-Ahmad Hospital (Innovation Research Laboratory)                                                                         | MOH - Jaber Al-Ahmad Hospital (Innovation Research Laboratory) | Salman Al-Sabah et al   |
| EPI_ISL_903384 | MOH - Jaber Al-Ahmad Hospital (Innovation Research Laboratory)                                                                         | MOH - Jaber Al-Ahmad Hospital (Innovation Research Laboratory) | Salman Al-Sabah et al   |
| EPI_ISL_903377 | MOH - Jaber Al-Ahmad Hospital (Innovation Research Laboratory)                                                                         | MOH - Jaber Al-Ahmad Hospital (Innovation Research Laboratory) | Salman Al-Sabah et al   |
| EPI_ISL_437090 | Latvijas Infektoloģijas centrs                                                                                                         | Latvian Biomedical Research and Study Centre                   | Ivars Silamiķelis et al |
| EPI_ISL_450518 | E. Gulbja Laboratorija                                                                                                                 | Latvian Biomedical Research and Study Centre                   | Ivars Silamiķelis et al |
| EPI_ISL_450519 | E. Gulbja Laboratorija                                                                                                                 | Latvian Biomedical Research and Study Centre                   | Ivars Silamiķelis et al |
| EPI_ISL_450523 | Centrālā Laboratorija                                                                                                                  | Latvian Biomedical Research and Study Centre                   | Ivars Silamiķelis et al |
| EPI_ISL_450524 | Centrālā Laboratorija                                                                                                                  | Latvian Biomedical Research and Study Centre                   | Ivars Silamiķelis et al |
| EPI_ISL_486391 | Centrālā laboratorija                                                                                                                  | Latvian Biomedical Research and Study Centre                   | Ivars Silamiķelis et al |
| EPI_ISL_486410 | Centrala laboratorija                                                                                                                  | Latvian Biomedical Research and Study Centre                   | Ivars Silamiķelis et al |
| EPI_ISL_486411 | Centrālā laboratorija                                                                                                                  | Latvian Biomedical Research and Study Centre                   | Ivars Silamiķelis et al |
| EPI_ISL_486412 | Centrālā laboratorija                                                                                                                  | Latvian Biomedical Research and Study Centre                   | Ivars Silamiķelis et al |
| EPI_ISL_421655 | E. Gulbja Laboratorija                                                                                                                 | Latvian Biomedical Research and Study Centre                   | Ivars Silamiķelis et al |
| EPI_ISL_486413 | Centrālā laboratorija                                                                                                                  | Latvian Biomedical Research and Study Centre                   | Ivars Silamiķelis et al |
| EPI_ISL_486414 | Centrālā laboratorija                                                                                                                  | Latvian Biomedical Research and Study Centre                   | Ivars Silamiķelis et al |
| EPI_ISL_486415 | Centrālā laboratorija                                                                                                                  | Latvian Biomedical Research and Study Centre                   | Ivars Silamiķelis et al |
| EPI_ISL_486416 | Centrālā laboratorija                                                                                                                  | Latvian Biomedical Research and Study Centre                   | Ivars Silamiķelis et al |
| EPI_ISL_486417 | Centrala laboratorija                                                                                                                  | Latvian Biomedical Research and Study Centre                   | Ivars Silamiķelis et al |
| EPI_ISL_486418 | Centrālā laboratorija                                                                                                                  | Latvian Biomedical Research and Study Centre                   | Ivars Silamiķelis et al |
| EPI_ISL_486423 | Latvijas Infektoloģijas centrs                                                                                                         | Latvian Biomedical Research and Study Centre                   | Ivars Silamiķelis et al |
| EPI_ISL_486425 | Latvijas Infektoloģijas centrs                                                                                                         | Latvian Biomedical Research and Study Centre                   | Ivars Silamiķelis et al |
| EPI_ISL_492988 | Centrālā laboratorija                                                                                                                  | Latvian Biomedical Research and Study Centre                   | Ivars Silamiķelis et al |
| EPI_ISL_486428 | Latvijas Infektoloģijas centrs                                                                                                         | Latvian Biomedical Research and Study Centre                   | Ivars Silamiķelis et al |
| EPI_ISL_486431 | Latvijas Infektoloģijas centrs                                                                                                         | Latvian Biomedical Research and Study Centre                   | Ivars Silamiķelis et al |
| EPI_ISL_486433 | Latvijas Infektoloģijas centrs                                                                                                         | Latvian Biomedical Research and Study Centre                   | Ivars Silamiķelis et al |
| EPI_ISL_426285 | E. Gulbja Laboratorija                                                                                                                 | Latvian Biomedical Research and Study Centre                   | Ivars Silamiķelis et al |



|                |                                                                           |                                                                           |                         |
|----------------|---------------------------------------------------------------------------|---------------------------------------------------------------------------|-------------------------|
| EPI_ISL_639682 | E. Gulbja Laboratorija                                                    | Latvian Biomedical Research and Study Centre                              | Ivars Silamiķelis et al |
| EPI_ISL_639686 | E. Gulbja Laboratorija                                                    | Latvian Biomedical Research and Study Centre                              | Ivars Silamiķelis et al |
| EPI_ISL_639687 | E. Gulbja Laboratorija                                                    | Latvian Biomedical Research and Study Centre                              | Ivars Silamiķelis et al |
| EPI_ISL_639688 | E. Gulbja Laboratorija                                                    | Latvian Biomedical Research and Study Centre                              | Ivars Silamiķelis et al |
| EPI_ISL_639690 | E. Gulbja Laboratorija                                                    | Latvian Biomedical Research and Study Centre                              | Ivars Silamiķelis et al |
| EPI_ISL_639692 | E. Gulbja Laboratorija                                                    | Latvian Biomedical Research and Study Centre                              | Ivars Silamiķelis et al |
| EPI_ISL_639693 | E. Gulbja Laboratorija                                                    | Latvian Biomedical Research and Study Centre                              | Ivars Silamiķelis et al |
| EPI_ISL_639694 | E. Gulbja Laboratorija                                                    | Latvian Biomedical Research and Study Centre                              | Ivars Silamiķelis et al |
| EPI_ISL_770044 | E. Gulbja Laboratorija                                                    | Latvian Biomedical Research and Study Centre                              | Ivars Silamiķelis et al |
| EPI_ISL_770046 | E. Gulbja Laboratorija                                                    | Latvian Biomedical Research and Study Centre                              | Ivars Silamiķelis et al |
| EPI_ISL_770057 | E. Gulbja Laboratorija                                                    | Latvian Biomedical Research and Study Centre                              | Ivars Silamiķelis et al |
| EPI_ISL_856707 | MFD Veselības centrs "Dziedniecība"                                       | Latvian Biomedical Research and Study Centre                              | Ivars Silamiķelis et al |
| EPI_ISL_856708 | MFD Veselības centrs "Dziedniecība"                                       | Latvian Biomedical Research and Study Centre                              | Ivars Silamiķelis et al |
| EPI_ISL_856710 | MFD Veselības centrs "Dziedniecība"                                       | Latvian Biomedical Research and Study Centre                              | Ivars Silamiķelis et al |
| EPI_ISL_961808 | E. Gulbja laboratorija                                                    | Latvian Biomedical Research and Study Centre                              | Janis Pjalkovskis et al |
| EPI_ISL_961864 | E. Gulbja laboratorija                                                    | Latvian Biomedical Research and Study Centre                              | Janis Pjalkovskis et al |
| EPI_ISL_961858 | E. Gulbja laboratorija                                                    | Latvian Biomedical Research and Study Centre                              | Janis Pjalkovskis et al |
| EPI_ISL_961810 | Centrālā laboratorija                                                     | Latvian Biomedical Research and Study Centre                              | Janis Pjalkovskis et al |
| EPI_ISL_961852 | Latvijas Infektoloģijas Centrs                                            | Latvian Biomedical Research and Study Centre                              | Janis Pjalkovskis et al |
| EPI_ISL_961834 | Centrālā laboratorija                                                     | Latvian Biomedical Research and Study Centre                              | Janis Pjalkovskis et al |
| EPI_ISL_961839 | Centrālā laboratorija                                                     | Latvian Biomedical Research and Study Centre                              | Janis Pjalkovskis et al |
| EPI_ISL_961847 | Centrālā laboratorija                                                     | Latvian Biomedical Research and Study Centre                              | Janis Pjalkovskis et al |
| EPI_ISL_498226 | LIC                                                                       | LIC                                                                       | LIC et al               |
| EPI_ISL_982298 | School of Pharmacy                                                        | St. Jude Children's Research Hospital Infectious Diseases                 | Ahmed Kandeil et al     |
| EPI_ISL_637110 | Rafik Hariri University Hospital                                          | Microbial Pathogenomics Lab                                               | Georgi Merhi et al      |
| EPI_ISL_637112 | Rafik Hariri University Hospital                                          | Microbial Pathogenomics Lab                                               | Georgi Merhi et al      |
| EPI_ISL_637113 | Rafik Hariri University Hospital                                          | Microbial Pathogenomics Lab                                               | Georgi Merhi et al      |
| EPI_ISL_498554 | Lebanese American University                                              | Lebanese American University                                              | Abi Habib et al         |
| EPI_ISL_498552 | Lebanese American University                                              | Lebanese American University                                              | Abi Habib et al         |
| EPI_ISL_498556 | Lebanese American University                                              | Lebanese American University                                              | Abi Habib et al         |
| EPI_ISL_498551 | Lebanese American University                                              | Lebanese American University                                              | Abi Habib et al         |
| EPI_ISL_450508 | Rafik Hariri University Hospital                                          | Rafik Hariri University Hospital                                          | Rita Feghali et al      |
| EPI_ISL_450509 | Rafik Hariri University Hospital                                          | Rafik Hariri University Hospital                                          | Rita Feghali et al      |
| EPI_ISL_450511 | Rafik Hariri University Hospital                                          | Rafik Hariri University Hospital                                          | Rita Feghali et al      |
| EPI_ISL_450512 | Rafik Hariri University Hospital                                          | Rafik Hariri University Hospital                                          | Rita Feghali et al      |
| EPI_ISL_450514 | Rafik Hariri University Hospital                                          | Rafik Hariri University Hospital                                          | Rita Feghali et al      |
| EPI_ISL_450515 | Rafik Hariri University Hospital                                          | Rafik Hariri University Hospital                                          | Rita Feghali et al      |
| EPI_ISL_498692 | National Institute for Viral Disease Control and Prevention, China<br>CDC | National Institute for Viral Disease Control and Prevention, China<br>CDC | Xiang Zhao et al        |























|                |                                                             |                                                             |                         |
|----------------|-------------------------------------------------------------|-------------------------------------------------------------|-------------------------|
| EPI_ISL_977593 | Malaysia Genome Institute                                   | Malaysia Genome Institute                                   | Mohd Noor Mat Isa et al |
| EPI_ISL_416829 | National Public Health Laboratory                           | Malaysia Genome Institute                                   | Mohd Noor Mat Isa et al |
| EPI_ISL_416866 | National Public Health Laboratory                           | Malaysia Genome Institute                                   | Mohd Noor Mat Isa et al |
| EPI_ISL_416884 | National Public Health Laboratory                           | Malaysia Genome Institute                                   | Mohd Noor Mat Isa et al |
| EPI_ISL_416885 | National Public Health Laboratory                           | Malaysia Genome Institute                                   | Mohd Noor Mat Isa et al |
| EPI_ISL_416886 | National Public Health Laboratory                           | Malaysia Genome Institute                                   | Mohd Noor Mat Isa et al |
| EPI_ISL_416907 | National Public Health Laboratory                           | Malaysia Genome Institute                                   | Mohd Noor Mat Isa et al |
| EPI_ISL_718163 | Ministry of Health Hospitals                                | Institute of Health and Community Medicine                  | David Perera et al      |
| EPI_ISL_718140 | Ministry of Health Hospitals                                | Institute of Health and Community Medicine                  | David Perera et al      |
| EPI_ISL_718148 | Ministry of Health Hospitals                                | Institute of Health and Community Medicine                  | David Perera et al      |
| EPI_ISL_718132 | Ministry of Health Hospitals                                | Institute of Health and Community Medicine                  | David Perera et al      |
| EPI_ISL_718149 | Ministry of Health Hospitals                                | Institute of Health and Community Medicine                  | David Perera et al      |
| EPI_ISL_718146 | Ministry of Health Hospitals                                | Institute of Health and Community Medicine                  | David Perera et al      |
| EPI_ISL_718143 | Ministry of Health Hospitals                                | Institute of Health and Community Medicine                  | David Perera et al      |
| EPI_ISL_718219 | Ministry of Health Hospitals                                | Institute of Health and Community Medicine                  | David Perera et al      |
| EPI_ISL_718168 | Ministry of Health Hospitals                                | Institute of Health and Community Medicine                  | David Perera et al      |
| EPI_ISL_718169 | Ministry of Health Hospitals                                | Institute of Health and Community Medicine                  | David Perera et al      |
| EPI_ISL_718170 | Ministry of Health Hospitals                                | Institute of Health and Community Medicine                  | David Perera et al      |
| EPI_ISL_718220 | Ministry of Health Hospitals                                | Institute of Health and Community Medicine                  | David Perera et al      |
| EPI_ISL_718139 | Ministry of Health Hospitals                                | Institute of Health and Community Medicine                  | David Perera et al      |
| EPI_ISL_718156 | Ministry of Health Hospitals                                | Institute of Health and Community Medicine                  | David Perera et al      |
| EPI_ISL_718154 | Ministry of Health Hospitals                                | Institute of Health and Community Medicine                  | David Perera et al      |
| EPI_ISL_487447 | CICM-Mali                                                   | Bundeswehr Institut of Microbiology                         | Kouriba et al           |
| EPI_ISL_487448 | CICM-Mali                                                   | Bundeswehr Institut of Microbiology                         | Kouriba et al           |
| EPI_ISL_487449 | CICM-Mali                                                   | Bundeswehr Institut of Microbiology                         | Kouriba et al           |
| EPI_ISL_487451 | CICM-Mali                                                   | Bundeswehr Institut of Microbiology                         | Kouriba et al           |
| EPI_ISL_487454 | CICM-Mali                                                   | Bundeswehr Institut of Microbiology                         | Kouriba et al           |
| EPI_ISL_487455 | CICM-Mali                                                   | Bundeswehr Institut of Microbiology                         | Kouriba et al           |
| EPI_ISL_487456 | CICM-Mali                                                   | Bundeswehr Institut of Microbiology                         | Kouriba et al           |
| EPI_ISL_487457 | CICM-Mali                                                   | Bundeswehr Institut of Microbiology                         | Kouriba et al           |
| EPI_ISL_487458 | CICM-Mali                                                   | Bundeswehr Institut of Microbiology                         | Kouriba et al           |
| EPI_ISL_487459 | CICM-Mali                                                   | Bundeswehr Institut of Microbiology                         | Kouriba et al           |
| EPI_ISL_487460 | CICM-Mali                                                   | Bundeswehr Institut of Microbiology                         | Kouriba et al           |
| EPI_ISL_487465 | CICM-Mali                                                   | Bundeswehr Institut of Microbiology                         | Kouriba et al           |
| EPI_ISL_683835 | CICM                                                        | Malaria Research and Training Center (MRTC-Parasito)        | Antoine Dara et al      |
| EPI_ISL_812967 | University Clinical Research Center, University of Sciences | University Clinical Research Center, University of Sciences | Diarra et al            |
| EPI_ISL_812966 | University Clinical Research Center, University of Sciences | University Clinical Research Center, University of Sciences | Diarra et al            |
| EPI_ISL_576117 | Laboratory, The Bio Arte Limited                            | Laboratory, The Bio Arte Limited                            | Biazzo et al            |
| EPI_ISL_576118 | Laboratory, The Bio Arte Limited                            | Laboratory, The Bio Arte Limited                            | Biazzo et al            |

|                |                                             |                                  |                                                                  |
|----------------|---------------------------------------------|----------------------------------|------------------------------------------------------------------|
| EPI_ISL_576119 | Laboratory, The Bio Arte Limited            | Laboratory, The Bio Arte Limited | Biazzo et al                                                     |
| EPI_ISL_576120 | Laboratory, The Bio Arte Limited            | Laboratory, The Bio Arte Limited | Biazzo et al                                                     |
| EPI_ISL_576121 | Laboratory, The Bio Arte Limited            | Laboratory, The Bio Arte Limited | Biazzo et al                                                     |
| EPI_ISL_576122 | Laboratory, The Bio Arte Limited            | Laboratory, The Bio Arte Limited | Biazzo et al                                                     |
| EPI_ISL_576123 | Laboratory, The Bio Arte Limited            | Laboratory, The Bio Arte Limited | Biazzo et al                                                     |
| EPI_ISL_576124 | Laboratory, The Bio Arte Limited            | Laboratory, The Bio Arte Limited | Biazzo et al                                                     |
| EPI_ISL_576125 | Laboratory, The Bio Arte Limited            | Laboratory, The Bio Arte Limited | Biazzo et al                                                     |
| EPI_ISL_496354 | Infectolab                                  | Andersen lab at Scripps Research | SEARCH Alliance San Diego with Samuel Navarro Alvarez et al      |
| EPI_ISL_496365 | Infectolab                                  | Andersen lab at Scripps Research | SEARCH Alliance San Diego with Samuel Navarro Alvarez et al      |
| EPI_ISL_496367 | Infectolab                                  | Andersen lab at Scripps Research | SEARCH Alliance San Diego with Samuel Navarro Alvarez et al      |
| EPI_ISL_496373 | Infectolab                                  | Andersen lab at Scripps Research | SEARCH Alliance San Diego with Samuel Navarro Alvarez et al      |
| EPI_ISL_496374 | Infectolab                                  | Andersen lab at Scripps Research | SEARCH Alliance San Diego with Samuel Navarro Alvarez et al      |
| EPI_ISL_635486 | Centro de Diagnóstico COVID-19 UABC Tijuana | Andersen lab at Scripps Research | SEARCH Alliance San Diego with Idanya Rubí Serafín Higuera et al |
| EPI_ISL_635495 | Centro de Diagnóstico COVID-19 UABC Tijuana | Andersen lab at Scripps Research | SEARCH Alliance San Diego with Idanya Rubí Serafín Higuera et al |
| EPI_ISL_635500 | Centro de Diagnóstico COVID-19 UABC Tijuana | Andersen lab at Scripps Research | SEARCH Alliance San Diego with Idanya Rubí Serafín Higuera et al |
| EPI_ISL_635510 | Centro de Diagnóstico COVID-19 UABC Tijuana | Andersen lab at Scripps Research | SEARCH Alliance San Diego with Idanya Rubí Serafín Higuera et al |
| EPI_ISL_635515 | Centro de Diagnóstico COVID-19 UABC Tijuana | Andersen lab at Scripps Research | SEARCH Alliance San Diego with Idanya Rubí Serafín Higuera et al |
| EPI_ISL_635517 | Centro de Diagnóstico COVID-19 UABC Tijuana | Andersen lab at Scripps Research | SEARCH Alliance San Diego with Idanya Rubí Serafín Higuera et al |
| EPI_ISL_635521 | Centro de Diagnóstico COVID-19 UABC Tijuana | Andersen lab at Scripps Research | SEARCH Alliance San Diego with Idanya Rubí Serafín Higuera et al |
| EPI_ISL_635528 | Centro de Diagnóstico COVID-19 UABC Tijuana | Andersen lab at Scripps Research | SEARCH Alliance San Diego with Idanya Rubí Serafín Higuera et al |
| EPI_ISL_635540 | Centro de Diagnóstico COVID-19 UABC Tijuana | Andersen lab at Scripps Research | SEARCH Alliance San Diego with Idanya Rubí Serafín Higuera et al |
| EPI_ISL_635545 | Centro de Diagnóstico COVID-19 UABC Tijuana | Andersen lab at Scripps Research | SEARCH Alliance San Diego with Idanya Rubí Serafín Higuera et al |
| EPI_ISL_635560 | Centro de Diagnóstico COVID-19 UABC Tijuana | Andersen lab at Scripps Research | SEARCH Alliance San Diego with Idanya Rubí Serafín Higuera et al |
| EPI_ISL_635569 | Centro de Diagnóstico COVID-19 UABC Tijuana | Andersen lab at Scripps Research | SEARCH Alliance San Diego with Idanya Rubí Serafín Higuera et al |
| EPI_ISL_636113 | Sharp HealthCare Laboratory                 | Andersen lab at Scripps Research | SEARCH Alliance San Diego with Aaron Harding et al               |
| EPI_ISL_636114 | Sharp HealthCare Laboratory                 | Andersen lab at Scripps Research | SEARCH Alliance San Diego with Aaron Harding et al               |
| EPI_ISL_730130 | Sharp HealthCare Laboratory                 | Andersen lab at Scripps Research | SEARCH Alliance San Diego with Aaron Harding et al               |
| EPI_ISL_730133 | Sharp HealthCare Laboratory                 | Andersen lab at Scripps Research | SEARCH Alliance San Diego with Aaron Harding et al               |

|                |                                                               |                                                                                                                                                                                                                   |                                                               |
|----------------|---------------------------------------------------------------|-------------------------------------------------------------------------------------------------------------------------------------------------------------------------------------------------------------------|---------------------------------------------------------------|
| EPI_ISL_730135 | Sharp HealthCare Laboratory                                   | Andersen lab at Scripps Research                                                                                                                                                                                  | SEARCH Alliance San Diego with Aaron Harding et al            |
| EPI_ISL_730226 | Genomica Lab Molecular, Mv©xico                               | Andersen lab at Scripps Research<br>Pathogen Laboratory (BSL3), Biomedical Innovation Department, Experimental and Applied Biology Division, Scientific Research Center and High Education from Ensenada (CICESE) | SEARCH Alliance San Diego with Jonathan Gonzalez Garcia et al |
| EPI_ISL_747243 | General Hospital Laboratory                                   |                                                                                                                                                                                                                   | Cervantes-Luevano K. et al                                    |
| EPI_ISL_493345 | Instituto de Diagnostico y Referencia Epidemiologicos (INDRE) | Instituto de Diagnostico y Referencia Epidemiologicos (INDRE)                                                                                                                                                     | Ernesto Ramirez-Gonzalez et al                                |
| EPI_ISL_493346 | Instituto de Diagnostico y Referencia Epidemiologicos (INDRE) | Instituto de Diagnostico y Referencia Epidemiologicos (INDRE)                                                                                                                                                     | Ernesto Ramirez-Gonzalez et al                                |
| EPI_ISL_493338 | Instituto de Diagnostico y Referencia Epidemiologicos (INDRE) | Instituto de Diagnostico y Referencia Epidemiologicos (INDRE)                                                                                                                                                     | Gisela Barrera-Badillo et al                                  |
| EPI_ISL_837609 | Instituto Nacional de Enfermedades Respiratorias (INER)       | Instituto Nacional de Enfermedades Respiratorias (INER)                                                                                                                                                           | Celia Boukadida et al                                         |
| EPI_ISL_837641 | Instituto Nacional de Enfermedades Respiratorias (INER)       | Instituto Nacional de Enfermedades Respiratorias (INER)                                                                                                                                                           | Celia Boukadida et al                                         |
| EPI_ISL_837692 | Instituto Nacional de Enfermedades Respiratorias (INER)       | Instituto Nacional de Enfermedades Respiratorias (INER)                                                                                                                                                           | Celia Boukadida et al                                         |
| EPI_ISL_837732 | Instituto Nacional de Enfermedades Respiratorias (INER)       | Instituto Nacional de Enfermedades Respiratorias (INER)                                                                                                                                                           | Celia Boukadida et al                                         |
| EPI_ISL_837788 | Instituto Nacional de Enfermedades Respiratorias (INER)       | Instituto Nacional de Enfermedades Respiratorias (INER)                                                                                                                                                           | Celia Boukadida et al                                         |
| EPI_ISL_837792 | Instituto Nacional de Enfermedades Respiratorias (INER)       | Instituto Nacional de Enfermedades Respiratorias (INER)                                                                                                                                                           | Celia Boukadida et al                                         |
| EPI_ISL_837798 | Instituto Nacional de Enfermedades Respiratorias (INER)       | Instituto Nacional de Enfermedades Respiratorias (INER)                                                                                                                                                           | Celia Boukadida et al                                         |
| EPI_ISL_837804 | Instituto Nacional de Enfermedades Respiratorias (INER)       | Instituto Nacional de Enfermedades Respiratorias (INER)                                                                                                                                                           | Celia Boukadida et al                                         |
| EPI_ISL_837810 | Instituto Nacional de Enfermedades Respiratorias (INER)       | Instituto Nacional de Enfermedades Respiratorias (INER)                                                                                                                                                           | Celia Boukadida et al                                         |
| EPI_ISL_837811 | Instituto Nacional de Enfermedades Respiratorias (INER)       | Instituto Nacional de Enfermedades Respiratorias (INER)                                                                                                                                                           | Celia Boukadida et al                                         |
| EPI_ISL_837812 | Instituto Nacional de Enfermedades Respiratorias (INER)       | Instituto Nacional de Enfermedades Respiratorias (INER)                                                                                                                                                           | Celia Boukadida et al                                         |
| EPI_ISL_837813 | Instituto Nacional de Enfermedades Respiratorias (INER)       | Instituto Nacional de Enfermedades Respiratorias (INER)                                                                                                                                                           | Celia Boukadida et al                                         |
| EPI_ISL_837814 | Instituto Nacional de Enfermedades Respiratorias (INER)       | Instituto Nacional de Enfermedades Respiratorias (INER)                                                                                                                                                           | Celia Boukadida et al                                         |
| EPI_ISL_985157 | Instituto Nacional de Medicina Genomica                       | Instituto Nacional de Medicina Genomica                                                                                                                                                                           | Hidalgo-Miranda A et al                                       |
| EPI_ISL_944614 | Instituto Nacional de Medicina Genomica                       | Instituto Nacional de Medicina Genomica                                                                                                                                                                           | Hidalgo-Miranda A et al                                       |
| EPI_ISL_944617 | Instituto Nacional de Medicina Genomica                       | Instituto Nacional de Medicina Genomica                                                                                                                                                                           | Hidalgo-Miranda A et al                                       |
| EPI_ISL_944618 | Instituto Nacional de Medicina Genomica                       | Instituto Nacional de Medicina Genomica                                                                                                                                                                           | Hidalgo-Miranda A et al                                       |
| EPI_ISL_944623 | Instituto Nacional de Medicina Genomica                       | Instituto Nacional de Medicina Genomica                                                                                                                                                                           | Hidalgo-Miranda A et al                                       |
| EPI_ISL_944625 | Instituto Nacional de Medicina Genomica                       | Instituto Nacional de Medicina Genomica                                                                                                                                                                           | Hidalgo-Miranda A et al                                       |
| EPI_ISL_944627 | Instituto Nacional de Medicina Genomica                       | Instituto Nacional de Medicina Genomica                                                                                                                                                                           | Hidalgo-Miranda A et al                                       |
| EPI_ISL_944632 | Instituto Nacional de Medicina Genomica                       | Instituto Nacional de Medicina Genomica                                                                                                                                                                           | Hidalgo-Miranda A et al                                       |
| EPI_ISL_522874 | Instituto Nacional de Medicina Genomica                       | Instituto Nacional de Medicina Genomica                                                                                                                                                                           | Hidalgo-Miranda A et al                                       |
| EPI_ISL_522875 | Instituto Nacional de Medicina Genomica                       | Instituto Nacional de Medicina Genomica                                                                                                                                                                           | Hidalgo-Miranda A et al                                       |
| EPI_ISL_522878 | Instituto Nacional de Medicina Genomica                       | Instituto Nacional de Medicina Genomica                                                                                                                                                                           | Hidalgo-Miranda A et al                                       |
| EPI_ISL_933520 | Instituto Nacional de Medicina Genomica                       | Instituto Nacional de Medicina Genomica                                                                                                                                                                           | Hidalgo-Miranda A et al                                       |
| EPI_ISL_933522 | Instituto Nacional de Medicina Genomica                       | Instituto Nacional de Medicina Genomica                                                                                                                                                                           | Hidalgo-Miranda A et al                                       |
| EPI_ISL_933531 | Instituto Nacional de Medicina Genomica                       | Instituto Nacional de Medicina Genomica                                                                                                                                                                           | Hidalgo-Miranda A et al                                       |
| EPI_ISL_955196 | Instituto Nacional de Medicina Genomica                       | Instituto Nacional de Medicina Genomica                                                                                                                                                                           | Hidalgo-Miranda A et al                                       |
| EPI_ISL_955192 | Instituto Nacional de Medicina Genomica                       | Instituto Nacional de Medicina Genomica                                                                                                                                                                           | Hidalgo-Miranda A et al                                       |
| EPI_ISL_955203 | Instituto Nacional de Medicina Genomica                       | Instituto Nacional de Medicina Genomica                                                                                                                                                                           | Hidalgo-Miranda A et al                                       |
| EPI_ISL_955208 | Instituto Nacional de Medicina Genomica                       | Instituto Nacional de Medicina Genomica                                                                                                                                                                           | Hidalgo-Miranda A et al                                       |



|                |                                                                                                                                                                                                      |                                                                                                                                                   |                                 |
|----------------|------------------------------------------------------------------------------------------------------------------------------------------------------------------------------------------------------|---------------------------------------------------------------------------------------------------------------------------------------------------|---------------------------------|
| EPI_ISL_522984 | Instituto Nacional de Medicina Genómica                                                                                                                                                              | Instituto Nacional de Medicina Genómica                                                                                                           | Hidalgo-Miranda A et al         |
| EPI_ISL_412972 | Instituto Nacional de Enfermedades Respiratorias                                                                                                                                                     | Instituto de Diagnostico y Referencia Epidemiologicos (INDRE)                                                                                     | Ramirez-Gonzalez Ernesto et al  |
| EPI_ISL_452139 | Instituto de Diagnostico y Referencia Epidemiologicos (INDRE)                                                                                                                                        | Instituto de diagnóstico y Referencia Epidemiologicos (INDRE)                                                                                     | Ramirez-Gonzalez Ernesto et al  |
| EPI_ISL_913967 | INDRE_RNLSP<br>Instituto de Diagnostico y Referencia Epidemiologicos                                                                                                                                 | Instituto de Diagnostico y Referencia Epidemiologicos (INDRE)                                                                                     | Claudia Wong-Arambula et al     |
| EPI_ISL_933684 | INDRE_RNLSP<br>Instituto de Diagnostico y Referencia Epidemiologicos                                                                                                                                 | Instituto de Diagnostico y Referencia Epidemiologicos (INDRE)                                                                                     | Claudia Wong-Arambula et al     |
| EPI_ISL_933685 | INDRE_RNLSP<br>Instituto de Diagnostico y Referencia Epidemiologicos                                                                                                                                 | Instituto de Diagnostico y Referencia Epidemiologicos (INDRE)                                                                                     | Claudia Wong-Arambula et al     |
| EPI_ISL_933686 | INDRE_RNLSP<br>Instituto de Diagnostico y Referencia Epidemiologicos                                                                                                                                 | Instituto de Diagnostico y Referencia Epidemiologicos (INDRE)                                                                                     | Claudia Wong-Arambula et al     |
| EPI_ISL_933691 | INDRE_RNLSP<br>Instituto de Diagnostico y Referencia Epidemiologicos                                                                                                                                 | Instituto de Diagnostico y Referencia Epidemiologicos (INDRE)                                                                                     | Claudia Wong-Arambula et al     |
| EPI_ISL_933693 | INDRE_RNLSP<br>Instituto de Diagnostico y Referencia Epidemiologicos                                                                                                                                 | Instituto de Diagnostico y Referencia Epidemiologicos (INDRE)                                                                                     | Claudia Wong-Arambula et al     |
| EPI_ISL_933695 | INDRE_RNLSP<br>Instituto de Diagnostico y Referencia Epidemiologicos                                                                                                                                 | Instituto de Diagnostico y Referencia Epidemiologicos (INDRE)                                                                                     | Claudia Wong-Arambula et al     |
| EPI_ISL_933700 | INDRE_RNLSP<br>Instituto de Diagnostico y Referencia Epidemiologicos                                                                                                                                 | Instituto de Diagnostico y Referencia Epidemiologicos (INDRE)                                                                                     | Claudia Wong-Arambula et al     |
| EPI_ISL_933707 | INDRE_RNLSP                                                                                                                                                                                          | Instituto de Diagnostico y Referencia Epidemiologicos (INDRE)                                                                                     | Claudia Wong-Arambula et al     |
| EPI_ISL_658901 | Instituto de Diagnostico y Referencia Epidemiologicos (INDRE)                                                                                                                                        | Instituto de Diagnostico y Referencia Epidemiologicos (INDRE)                                                                                     | Ernesto Ramirez-Gonzalez et al  |
| EPI_ISL_913927 | INDRE_RNLSP<br>Instituto de Diagnostico y Referencia Epidemiologicos                                                                                                                                 | Instituto de Diagnostico y Referencia Epidemiologicos (INDRE)                                                                                     | Claudia Wong-Arambula et al     |
| EPI_ISL_913965 | INDRE_RNLSP<br>Instituto de Diagnostico y Referencia Epidemiologicos                                                                                                                                 | Instituto de Diagnostico y Referencia Epidemiologicos (INDRE)                                                                                     | Claudia Wong-Arambula et al     |
| EPI_ISL_913971 | INDRE_RNLSP<br>Instituto de Diagnostico y Referencia Epidemiologicos                                                                                                                                 | Instituto de Diagnostico y Referencia Epidemiologicos (INDRE)                                                                                     | Claudia Wong-Arambula et al     |
| EPI_ISL_913978 | INDRE_RNLSP<br>Instituto de Diagnostico y Referencia Epidemiologicos                                                                                                                                 | Instituto de Diagnostico y Referencia Epidemiologicos (INDRE)                                                                                     | Claudia Wong-Arambula et al     |
| EPI_ISL_913922 | INDRE_RNLSP<br>Instituto de Diagnostico y Referencia Epidemiologicos                                                                                                                                 | Instituto de Diagnostico y Referencia Epidemiologicos (INDRE)                                                                                     | Claudia Wong-Arambula et al     |
| EPI_ISL_913973 | INDRE_RNLSP<br>Instituto de Diagnostico y Referencia Epidemiologicos                                                                                                                                 | Instituto de Diagnostico y Referencia Epidemiologicos (INDRE)                                                                                     | Claudia Wong-Arambula et al     |
| EPI_ISL_913926 | INDRE_RNLSP                                                                                                                                                                                          | Instituto de Diagnostico y Referencia Epidemiologicos (INDRE)                                                                                     | Claudia Wong-Arambula et al     |
| EPI_ISL_779169 | Laboratorio de Infectología, Servicio de Infectología, Hospital Universitario Dr. José Eleuterio González - Universidad Autónoma de Nuevo León                                                       | Laboratorio de Infectología Molecular, Departamento de Bioquímica y Medicina Molecular, Facultad de Medicina - Universidad Autónoma de Nuevo León | Kame A. Galán-Huerta et al      |
| EPI_ISL_979343 | Laboratorio Estatal de Salud Pública de Nuevo León<br>Laboratorio de Infectología, Servicio de Infectología, Hospital Universitario Dr. José Eleuterio González - Universidad Autónoma de Nuevo León | Laboratorio de Infectología Molecular, Departamento de Bioquímica y Medicina Molecular, Facultad de Medicina - Universidad Autónoma de Nuevo León | Kame A. Galán-Huerta et al      |
| EPI_ISL_961794 | Laboratorio de Infectología, Servicio de Infectología, Hospital Universitario Dr. José Eleuterio González - Universidad Autónoma de Nuevo León                                                       | Laboratorio de Infectología Molecular, Departamento de Bioquímica y Medicina Molecular, Facultad de Medicina - Universidad Autónoma de Nuevo León | Kame A. Galán-Huerta et al      |
| EPI_ISL_961773 | Laboratorio de Infectología, Servicio de Infectología, Hospital Universitario Dr. José Eleuterio González - Universidad Autónoma de Nuevo León                                                       | Laboratorio de Infectología Molecular, Departamento de Bioquímica y Medicina Molecular, Facultad de Medicina - Universidad Autónoma de Nuevo León | Kame A. Galán-Huerta et al      |
| EPI_ISL_961766 | Laboratorio de Infectología Servicio de Infectología Hospital Universitario Dr. José Eleuterio González - Universidad Autónoma de Nuevo León                                                         | Laboratorio de Infectología Molecular Departamento de Bioquímica y Medicina Molecular Facultad de Medicina - Universidad Autónoma de Nuevo León   | Kame A. Galán-Huerta et al      |
| EPI_ISL_648595 | Laboratorio de Infectología Servicio de Infectología Hospital Universitario Dr. José Eleuterio González - Universidad Autónoma de Nuevo León                                                         | Laboratorio de Infectología Molecular Departamento de Bioquímica y Medicina Molecular Facultad de Medicina - Universidad Autónoma de Nuevo León   | Kame A. Galán-Huerta et al      |
| EPI_ISL_648597 | Laboratorio Estatal de Salud Publica del Estado de Puebla                                                                                                                                            | Instituto de Diagnostico y Referencia Epidemiologicos                                                                                             | Fabiola Garcés Ayala et al      |
| EPI_ISL_424672 | Laboratorio Estatal de Salud Publica del Estado de Puebla                                                                                                                                            | Instituto de Diagnostico y Referencia Epidemiologicos (INDRE)                                                                                     | Rodriguez-Maldonado Abril et al |
| EPI_ISL_455455 | Instituto de Diagnostico y Referencia Epidemiologicos (INDRE)                                                                                                                                        | Instituto de Diagnostico y Referencia Epidemiologicos (INDRE)                                                                                     | Claudia Wong-Arambula et al     |
| EPI_ISL_913931 | INDRE_RNLSP<br>Instituto de Diagnostico y Referencia Epidemiologicos                                                                                                                                 | Instituto de Diagnostico y Referencia Epidemiologicos (INDRE)                                                                                     | Claudia Wong-Arambula et al     |
| EPI_ISL_913932 | INDRE_RNLSP                                                                                                                                                                                          | Instituto de Diagnostico y Referencia Epidemiologicos (INDRE)                                                                                     | Claudia Wong-Arambula et al     |

|                |                                                                                                                 |                                                                                                                         |                                 |
|----------------|-----------------------------------------------------------------------------------------------------------------|-------------------------------------------------------------------------------------------------------------------------|---------------------------------|
| EPI_ISL_913959 | Instituto de Diagnostico y Referencia Epidemiologicos<br>INDRE_RNLSP                                            | Instituto de Diagnostico y Referencia Epidemiologicos (INDRE)                                                           | Claudia Wong-Arambula et al     |
| EPI_ISL_933667 | Instituto de Diagnostico y Referencia Epidemiologicos<br>INDRE_RNLSP                                            | Instituto de Diagnostico y Referencia Epidemiologicos (INDRE)                                                           | Claudia Wong-Arambula et al     |
| EPI_ISL_658904 | Instituto de Diagnostico y Referencia Epidemiologicos (INDRE)                                                   | Instituto de Diagnostico y Referencia Epidemiologicos (INDRE)                                                           | Ernesto Ramirez-Gonzalez et al  |
| EPI_ISL_872093 | Instituto de Diagnostico y Referencia Epidemiologicos (INDRE)                                                   | Instituto de Diagnostico y Referencia Epidemiologicos (INDRE)                                                           | Edgar Mendieta-Condado et al    |
| EPI_ISL_913923 | INDRE_RNLSP                                                                                                     | Instituto de Diagnostico y Referencia Epidemiologicos (INDRE)                                                           | Claudia Wong-Arambula et al     |
| EPI_ISL_933666 | INDRE_RNLSP                                                                                                     | Instituto de Diagnostico y Referencia Epidemiologicos (INDRE)                                                           | Claudia Wong-Arambula et al     |
| EPI_ISL_913929 | Instituto de Diagnostico y Referencia Epidemiologicos<br>INDRE_RNLSP                                            | Instituto de Diagnostico y Referencia Epidemiologicos (INDRE)                                                           | Claudia Wong-Arambula et al     |
| EPI_ISL_872097 | Instituto de Diagnostico y Referencia Epidemiologicos (INDRE)                                                   | Instituto de Diagnostico y Referencia Epidemiologicos (INDRE)                                                           | Abril Rodriguez-Maldonado et al |
| EPI_ISL_576269 | Instituto de Diagnostico y Referencia Epidemiologicos (INDRE)                                                   | Instituto de Diagnostico y Referencia Epidemiologicos (INDRE)                                                           | Ernesto Ramirez-Gonzalez et al  |
| EPI_ISL_576270 | Instituto de Diagnostico y Referencia Epidemiologicos (INDRE)                                                   | Instituto de Diagnostico y Referencia Epidemiologicos (INDRE)                                                           | Ernesto Ramirez-Gonzalez et al  |
| EPI_ISL_913915 | INDRE_RNLSP                                                                                                     | Instituto de Diagnostico y Referencia Epidemiologicos (INDRE)                                                           | Claudia Wong-Arambula et al     |
| EPI_ISL_913920 | INDRE_RNLSP                                                                                                     | Instituto de Diagnostico y Referencia Epidemiologicos (INDRE)                                                           | Claudia Wong-Arambula et al     |
| EPI_ISL_913921 | INDRE_RNLSP                                                                                                     | Instituto de Diagnostico y Referencia Epidemiologicos (INDRE)                                                           | Claudia Wong-Arambula et al     |
| EPI_ISL_913970 | Instituto de Diagnostico y Referencia Epidemiologicos<br>INDRE_RNLSP                                            | Instituto de Diagnostico y Referencia Epidemiologicos (INDRE)                                                           | Claudia Wong-Arambula et al     |
| EPI_ISL_523960 | National Agency for Public Health, Republic of Moldova                                                          | Charite Universitätsmedizin Berlin, Institute of Virology                                                               | Victor M Corman et al           |
| EPI_ISL_523962 | National Agency for Public Health, Republic of Moldova                                                          | Charite Universitätsmedizin Berlin, Institute of Virology                                                               | Victor M Corman et al           |
| EPI_ISL_523964 | National Agency for Public Health, Republic of Moldova                                                          | Charite Universitätsmedizin Berlin, Institute of Virology                                                               | Victor M Corman et al           |
| EPI_ISL_523968 | National Agency for Public Health, Republic of Moldova                                                          | Charite Universitätsmedizin Berlin, Institute of Virology                                                               | Victor M Corman et al           |
| EPI_ISL_523966 | National Agency for Public Health, Republic of Moldova                                                          | Charite Universitätsmedizin Berlin, Institute of Virology                                                               | Victor M Corman et al           |
| EPI_ISL_516934 | Nicolae Testemitanu State University of Medicine and Pharmacy                                                   | International Centre for Genetic Engineering and Biotechnology (ICGEB) and ARGO Open Lab Platform for Genome Sequencing | Ulinici M et al                 |
| EPI_ISL_516938 | Nicolae Testemitanu State University of Medicine and Pharmacy                                                   | International Centre for Genetic Engineering and Biotechnology (ICGEB) and ARGO Open Lab Platform for Genome Sequencing | Ulinici M et al                 |
| EPI_ISL_516936 | Nicolae Testemitanu State University of Medicine and Pharmacy                                                   | International Centre for Genetic Engineering and Biotechnology (ICGEB) and ARGO Open Lab Platform for Genome Sequencing | Ulinici M et al                 |
| EPI_ISL_626569 | National Centre for Communicable Disease (NCCD) National Influenza Center                                       | National Centre for Communicable Disease (NCCD) National Influenza Center                                               | Naranzul Ts et al               |
| EPI_ISL_626566 | National Centre for Communication Disease (NCCD) National Influenza Center                                      | National Centre for Communication Disease (NCCD) National Influenza Center                                              | Naranzul Ts et al               |
| EPI_ISL_626626 | National Centre for Communicable Disease (NCCD) National Influenza Center                                       | National Centre for Communicable Disease (NCCD) National Influenza Center                                               | Naranzul Ts et al               |
| EPI_ISL_626627 | National Centre for Communicable Disease (NCCD) National Influenza Center                                       | National Centre for Communicable Disease (NCCD) National Influenza Center                                               | Naranzul Ts et al               |
| EPI_ISL_467666 | Virology lab, NIC, NCCD, Ulaanbaatar, Mongolia                                                                  | National Centre for Communicable Deseases (NCCD)                                                                        | Naranzul Ts et al               |
| EPI_ISL_516922 | Department for Molecular Diagnostics, Centre for Medical Microbiology, Institute of Public Health of Montenegro | Charité Universitätsmedizin Berlin, Institut für Virologie                                                              | Victor M Corman et al           |
| EPI_ISL_516923 | Department for Molecular Diagnostics, Centre for Medical Microbiology, Institute of Public Health of Montenegro | Charité Universitätsmedizin Berlin, Institut für Virologie                                                              | Victor M Corman et al           |
| EPI_ISL_516924 | Department for Molecular Diagnostics, Centre for Medical Microbiology, Institute of Public Health of Montenegro | Charité Universitätsmedizin Berlin, Institut für Virologie                                                              | Victor M Corman et al           |
| EPI_ISL_516925 | Department for Molecular Diagnostics, Centre for Medical Microbiology, Institute of Public Health of Montenegro | Charité Universitätsmedizin Berlin, Institut für Virologie                                                              | Victor M Corman et al           |
| EPI_ISL_516926 | Department for Molecular Diagnostics, Centre for Medical Microbiology, Institute of Public Health of Montenegro | Charité Universitätsmedizin Berlin, Institut für Virologie                                                              | Victor M Corman et al           |

|                |                                                                                                                        |                                                                                                                                  |                       |
|----------------|------------------------------------------------------------------------------------------------------------------------|----------------------------------------------------------------------------------------------------------------------------------|-----------------------|
| EPI_ISL_516927 | Department for Molecular Diagnostics, Centre for Medical Microbiology, Institute of Public Health of Montenegro        | Charité Universitätsmedizin Berlin, Institut für Virologie                                                                       | Victor M Corman et al |
| EPI_ISL_516928 | Department for Molecular Diagnostics, Centre for Medical Microbiology, Institute of Public Health of Montenegro        | Charité Universitätsmedizin Berlin, Institut für Virologie                                                                       | Victor M Corman et al |
| EPI_ISL_516929 | Department for Molecular Diagnostics, Centre for Medical Microbiology, Institute of Public Health of Montenegro        | Charité Universitätsmedizin Berlin, Institut für Virologie                                                                       | Victor M Corman et al |
| EPI_ISL_516930 | Department for Molecular Diagnostics, Centre for Medical Microbiology, Institute of Public Health of Montenegro        | Charité Universitätsmedizin Berlin, Institut für Virologie                                                                       | Victor M Corman et al |
| EPI_ISL_516931 | Department for Molecular Diagnostics, Centre for Medical Microbiology, Institute of Public Health of Montenegro        | Charité Universitätsmedizin Berlin, Institut für Virologie                                                                       | Victor M Corman et al |
| EPI_ISL_516932 | Department for Molecular Diagnostics, Centre for Medical Microbiology, Institute of Public Health of Montenegro        | Charité Universitätsmedizin Berlin, Institut für Virologie                                                                       | Victor M Corman et al |
| EPI_ISL_516933 | Department for Molecular Diagnostics, Centre for Medical Microbiology, Institute of Public Health of Montenegro        | Charité Universitätsmedizin Berlin, Institut für Virologie                                                                       | Victor M Corman et al |
| EPI_ISL_458150 | ANOUAL                                                                                                                 | ANOUAL                                                                                                                           | Jouali Farah et al    |
| EPI_ISL_459965 | Institut Pasteur du Maroc                                                                                              | Institut Pasteur du Maroc                                                                                                        | Marion Barbet et al   |
| EPI_ISL_459966 | Institut Pasteur du Maroc                                                                                              | Institut Pasteur du Maroc                                                                                                        | Marion Barbet et al   |
| EPI_ISL_459967 | Institut Pasteur du Maroc                                                                                              | Institut Pasteur du Maroc                                                                                                        | Marion Barbet et al   |
| EPI_ISL_459968 | Institut Pasteur du Maroc                                                                                              | Institut Pasteur du Maroc                                                                                                        | Marion Barbet et al   |
| EPI_ISL_459969 | Institut Pasteur du Maroc                                                                                              | Institut Pasteur du Maroc                                                                                                        | Marion Barbet et al   |
| EPI_ISL_459970 | Institut Pasteur du Maroc                                                                                              | Institut Pasteur du Maroc                                                                                                        | Marion Barbet et al   |
| EPI_ISL_459972 | Institut Pasteur du Maroc                                                                                              | Institut Pasteur du Maroc                                                                                                        | Marion Barbet et al   |
| EPI_ISL_459980 | Institut Pasteur du Maroc                                                                                              | Institut Pasteur du Maroc                                                                                                        | Marion Barbet et al   |
| EPI_ISL_459981 | Institut Pasteur du Maroc                                                                                              | Institut Pasteur du Maroc                                                                                                        | Marion Barbet et al   |
| EPI_ISL_459984 | Institut Pasteur du Maroc                                                                                              | Institut Pasteur du Maroc                                                                                                        | Marion Barbet et al   |
| EPI_ISL_775219 | Laboratoire Biolife                                                                                                    | Laboratoire de Biotechnologie                                                                                                    | Mouna Ouadghiri et al |
| EPI_ISL_775222 | Laboratoire Biolife                                                                                                    | Laboratoire de Biotechnologie                                                                                                    | Mouna Ouadghiri et al |
| EPI_ISL_775225 | Laboratoire Biolife                                                                                                    | Laboratoire de Biotechnologie                                                                                                    | Mouna Ouadghiri et al |
| EPI_ISL_966940 | Technical Support Units for Scientific Research (UATRS), National Centre for Scientific and Technical Research (CNRST) | Technical Support Units for Scientific Research (UATRS), National Centre for Scientific and Technical Research (CNRST)           | Touil et al           |
| EPI_ISL_471457 | Centre de Virologie des Maladies Tropicales                                                                            | National Genomic Platform Service Analyses Biologique/UATRS/ Centre National Pour la Recherche Scientifique Et Technique (CNRST) | Hicham EL ANNAZ et al |
| EPI_ISL_471458 | Centre de Virologie des Maladies Tropicales                                                                            | National Genomic Platform Service Analyses Biologique/UATRS/ Centre National Pour la Recherche Scientifique Et Technique (CNRST) | Hicham EL ANNAZ et al |
| EPI_ISL_471459 | Centre de Virologie des Maladies Tropicales                                                                            | National Genomic Platform Service Analyses Biologique/UATRS/ Centre National Pour la Recherche Scientifique Et Technique (CNRST) | Hicham EL ANNAZ et al |
| EPI_ISL_471460 | Centre de Virologie des Maladies Tropicales                                                                            | National Genomic Platform Service Analyses Biologique/UATRS/ Centre National Pour la Recherche Scientifique Et Technique (CNRST) | Hicham EL ANNAZ et al |
| EPI_ISL_971451 | Cell culture Unit at CV-MIT belonging to HIMMV                                                                         | Functional Genomic Platform UATRS-biology, CNRST                                                                                 | Nadia Touil et al     |
| EPI_ISL_469049 | LNR National Reference Laboratory, Mohammed VI University of Health Sciences                                           | Medical Biotechnology Laboratory, Rabat Medical and Pharmacy School, Mohammed The Vth University in Rabat                        | Meriem LAAMARTI et al |
| EPI_ISL_469051 | LNR National Reference Laboratory, Mohammed VI University of Health Sciences                                           | Medical Biotechnology Laboratory, Rabat Medical and Pharmacy School, Mohammed The Vth University in Rabat                        | Meriem LAAMARTI et al |
| EPI_ISL_469053 | LNR National Reference Laboratory, Mohammed VI University of Health Sciences                                           | Medical Biotechnology Laboratory, Rabat Medical and Pharmacy School, Mohammed The Vth University in Rabat                        | Meriem LAAMARTI et al |
| EPI_ISL_482740 | LNR National Reference Laboratory, Mohammed VI University of Health Sciences                                           | Medical Biotechnology Laboratory, Rabat Medical and Pharmacy School, Mohammed The Vth University in Rabat                        | Meriem LAAMARTI et al |

|                |                                                          |                                                                                                                                      |                              |
|----------------|----------------------------------------------------------|--------------------------------------------------------------------------------------------------------------------------------------|------------------------------|
| EPI_ISL_978535 | Centre de Virologie des Maladies infectueuses Tropicales | Functional Genomic Platform UATRS-biology, CNRST                                                                                     | Tahar BAJJOU et al           |
| EPI_ISL_978552 | Centre de Virologie des Maladies infectueuses Tropicales | Functional Genomic Platform UATRS-biology, CNRST                                                                                     | Sanaa ALAOUI-Amine et al     |
| EPI_ISL_978538 | Centre de Virologie des Maladies infectueuses Tropicales | Functional Genomic Platform UATRS-biology, CNRST                                                                                     | Mly Abdelaziz ELALAOUI et al |
| EPI_ISL_978540 | Centre de Virologie des Maladies infectueuses Tropicales | Functional Genomic Platform UATRS-biology, CNRST                                                                                     | Abdelilah LARAQUI et al      |
| EPI_ISL_978541 | Centre de Virologie des Maladies infectueuses Tropicales | Functional Genomic Platform UATRS-biology, CNRST                                                                                     | Marouane MELLOUL et al       |
| EPI_ISL_978543 | Centre de Virologie des Maladies infectueuses Tropicales | Functional Genomic Platform UATRS-biology, CNRST                                                                                     | Yassine SEKHSOKH et al       |
| EPI_ISL_978544 | Centre de Virologie des Maladies infectueuses Tropicales | Functional Genomic Platform UATRS-biology, CNRST                                                                                     | Elmostafa EL FAHIME et al    |
| EPI_ISL_476559 | unknown                                                  | Functional Genomic Platform UATRS-biology, CNRST) Institut Supérieur des Sciences de la Santé Université Hassan 1er, Settat, Morocco | Hajar Lemriss et al          |
| EPI_ISL_815255 | Centogene                                                | Centogene                                                                                                                            | Peter Bauer et al            |
| EPI_ISL_887457 | Instituto Nacional de Saude (INS), Mozambique            | KRISP, KZN Research Innovation and Sequencing Platform                                                                               | Nalia Ismael et al           |
| EPI_ISL_887458 | Instituto Nacional de Saude (INS), Mozambique            | KRISP, KZN Research Innovation and Sequencing Platform                                                                               | Nalia Ismael et al           |
| EPI_ISL_887438 | Instituto Nacional de Saude (INS), Mozambique            | KRISP, KZN Research Innovation and Sequencing Platform                                                                               | Nalia Ismael et al           |
| EPI_ISL_887461 | Instituto Nacional de Saude (INS), Mozambique            | KRISP, KZN Research Innovation and Sequencing Platform                                                                               | Nalia Ismael et al           |
| EPI_ISL_887463 | Instituto Nacional de Saude (INS), Mozambique            | KRISP, KZN Research Innovation and Sequencing Platform                                                                               | Nalia Ismael et al           |
| EPI_ISL_887465 | Instituto Nacional de Saude (INS), Mozambique            | KRISP, KZN Research Innovation and Sequencing Platform                                                                               | Nalia Ismael et al           |
| EPI_ISL_887466 | Instituto Nacional de Saude (INS), Mozambique            | KRISP, KZN Research Innovation and Sequencing Platform                                                                               | Nalia Ismael et al           |
| EPI_ISL_887489 | Instituto Nacional de Saude (INS), Mozambique            | KRISP, KZN Research Innovation and Sequencing Platform                                                                               | Nalia Ismael et al           |
| EPI_ISL_887490 | Instituto Nacional de Saude (INS), Mozambique            | KRISP, KZN Research Innovation and Sequencing Platform                                                                               | Nalia Ismael et al           |
| EPI_ISL_887491 | Instituto Nacional de Saude (INS), Mozambique            | KRISP, KZN Research Innovation and Sequencing Platform                                                                               | Nalia Ismael et al           |
| EPI_ISL_887499 | Instituto Nacional de Saude (INS), Mozambique            | KRISP, KZN Research Innovation and Sequencing Platform                                                                               | Nalia Ismael et al           |
| EPI_ISL_887420 | Instituto Nacional de Saude (INS), Mozambique            | KRISP, KZN Research Innovation and Sequencing Platform                                                                               | Nalia Ismael et al           |
| EPI_ISL_887500 | Instituto Nacional de Saude (INS), Mozambique            | KRISP, KZN Research Innovation and Sequencing Platform                                                                               | Nalia Ismael et al           |
| EPI_ISL_887501 | Instituto Nacional de Saude (INS), Mozambique            | KRISP, KZN Research Innovation and Sequencing Platform                                                                               | Nalia Ismael et al           |
| EPI_ISL_887421 | Instituto Nacional de Saude (INS), Mozambique            | KRISP, KZN Research Innovation and Sequencing Platform                                                                               | Nalia Ismael et al           |
| EPI_ISL_887434 | Instituto Nacional de Saude (INS), Mozambique            | KRISP, KZN Research Innovation and Sequencing Platform                                                                               | Nalia Ismael et al           |
| EPI_ISL_887431 | Instituto Nacional de Saude (INS), Mozambique            | KRISP, KZN Research Innovation and Sequencing Platform                                                                               | Nalia Ismael et al           |
| EPI_ISL_887426 | Instituto Nacional de Saude (INS), Mozambique            | KRISP, KZN Research Innovation and Sequencing Platform                                                                               | Nalia Ismael et al           |
| EPI_ISL_887502 | Instituto Nacional de Saude (INS), Mozambique            | KRISP, KZN Research Innovation and Sequencing Platform                                                                               | Nalia Ismael et al           |
| EPI_ISL_887503 | Instituto Nacional de Saude (INS), Mozambique            | KRISP, KZN Research Innovation and Sequencing Platform                                                                               | Nalia Ismael et al           |
| EPI_ISL_887429 | Instituto Nacional de Saude (INS), Mozambique            | KRISP, KZN Research Innovation and Sequencing Platform                                                                               | Nalia Ismael et al           |
| EPI_ISL_887430 | Instituto Nacional de Saude (INS), Mozambique            | KRISP, KZN Research Innovation and Sequencing Platform                                                                               | Nalia Ismael et al           |
| EPI_ISL_887504 | Instituto Nacional de Saude (INS), Mozambique            | KRISP, KZN Research Innovation and Sequencing Platform                                                                               | Nalia Ismael et al           |
| EPI_ISL_887423 | Instituto Nacional de Saude (INS), Mozambique            | KRISP, KZN Research Innovation and Sequencing Platform                                                                               | Nalia Ismael et al           |
| EPI_ISL_964937 | Instituto Nacional de Saude (INS), Mozambique            | KRISP, KZN Research Innovation and Sequencing Platform                                                                               | Nalia Ismael et al           |
| EPI_ISL_964943 | Instituto Nacional de Saude (INS), Mozambique            | KRISP, KZN Research Innovation and Sequencing Platform                                                                               | Nalia Ismael et al           |
| EPI_ISL_964944 | Instituto Nacional de Saude (INS), Mozambique            | KRISP, KZN Research Innovation and Sequencing Platform                                                                               | Nalia Ismael et al           |
| EPI_ISL_964945 | Instituto Nacional de Saude (INS), Mozambique            | KRISP, KZN Research Innovation and Sequencing Platform                                                                               | Nalia Ismael et al           |
| EPI_ISL_964919 | Instituto Nacional de Saude (INS), Mozambique            | KRISP, KZN Research Innovation and Sequencing Platform                                                                               | Nalia Ismael et al           |
| EPI_ISL_964918 | Instituto Nacional de Saude (INS), Mozambique            | KRISP, KZN Research Innovation and Sequencing Platform                                                                               | Nalia Ismael et al           |

|                |                                                                                        |                                                                                        |                           |
|----------------|----------------------------------------------------------------------------------------|----------------------------------------------------------------------------------------|---------------------------|
| EPI_ISL_964946 | Instituto Nacional de Saude (INS), Mozambique                                          | KRISP, KZN Research Innovation and Sequencing Platform                                 | Nalia Ismael et al        |
| EPI_ISL_964947 | Instituto Nacional de Saude (INS), Mozambique                                          | KRISP, KZN Research Innovation and Sequencing Platform                                 | Nalia Ismael et al        |
| EPI_ISL_964931 | Instituto Nacional de Saude (INS), Mozambique                                          | KRISP, KZN Research Innovation and Sequencing Platform                                 | Nalia Ismael et al        |
| EPI_ISL_964948 | Instituto Nacional de Saude (INS), Mozambique                                          | KRISP, KZN Research Innovation and Sequencing Platform                                 | Nalia Ismael et al        |
| EPI_ISL_964928 | Instituto Nacional de Saude (INS), Mozambique                                          | KRISP, KZN Research Innovation and Sequencing Platform                                 | Nalia Ismael et al        |
| EPI_ISL_636979 | HP Pemba                                                                               | KRISP, KZN Research Innovation and Sequencing Platform                                 | Ismael N et al            |
| EPI_ISL_636975 | HP Pemba                                                                               | KRISP, KZN Research Innovation and Sequencing Platform                                 | Ismael N et al            |
| EPI_ISL_636981 | City of Chimoio                                                                        | KRISP, KZN Research Innovation and Sequencing Platform                                 | Ismael N et al            |
| EPI_ISL_636977 | HP Pemba                                                                               | KRISP, KZN Research Innovation and Sequencing Platform                                 | Ismael N et al            |
| EPI_ISL_636978 | HP Pemba                                                                               | KRISP, KZN Research Innovation and Sequencing Platform                                 | Ismael N et al            |
| EPI_ISL_636980 | CS Xai Xai                                                                             | KRISP, KZN Research Innovation and Sequencing Platform                                 | Ismael N et al            |
| EPI_ISL_636976 | HP Pemba                                                                               | KRISP, KZN Research Innovation and Sequencing Platform                                 | Ismael N et al            |
| EPI_ISL_833041 | Defence Services Medical Research Center, Biological Research Laboratory               | Defence Services Medical Research Center, Biological Research Laboratory               | Khine Zaw Oo et al        |
| EPI_ISL_849736 | Special Operations Medical Research Division, Defence Services Medical Research Centre | Special Operations Medical Research Division, Defence Services Medical Research Centre | Oo et al                  |
| EPI_ISL_849737 | Special Operations Medical Research Division, Defence Services Medical Research Centre | Special Operations Medical Research Division, Defence Services Medical Research Centre | Oo et al                  |
| EPI_ISL_849738 | Special Operations Medical Research Division, Defence Services Medical Research Centre | Special Operations Medical Research Division, Defence Services Medical Research Centre | Oo et al                  |
| EPI_ISL_849740 | Special Operations Medical Research Division, Defence Services Medical Research Centre | Special Operations Medical Research Division, Defence Services Medical Research Centre | Oo et al                  |
| EPI_ISL_849742 | Special Operations Medical Research Division, Defence Services Medical Research Centre | Special Operations Medical Research Division, Defence Services Medical Research Centre | Oo et al                  |
| EPI_ISL_849743 | Special Operations Medical Research Division, Defence Services Medical Research Centre | Special Operations Medical Research Division, Defence Services Medical Research Centre | Oo et al                  |
| EPI_ISL_512844 | Department of Medical Research                                                         | DMR_Myanmar                                                                            | Myat Htut Nyunt et al     |
| EPI_ISL_754068 | Nepal Korea Friendship Municipality Hospital                                           | Nepal Health Research Council                                                          | Pradip Gyanwali et al     |
| EPI_ISL_754069 | Nepal Korea Friendship Municipality Hospital                                           | Nepal Health Research Council                                                          | Pradip Gyanwali et al     |
| EPI_ISL_410301 | National Influenza Centre, National Public Health Laboratory, Kathmandu, Nepal         | The University of Hong Kong                                                            | Ranjit Sah et al          |
| EPI_ISL_754062 | Kathmandu University                                                                   | Nepal Health Research Council                                                          | Pradip Gyanwali et al     |
| EPI_ISL_754064 | Kathmandu University                                                                   | Nepal Health Research Council                                                          | Pradip Gyanwali et al     |
| EPI_ISL_754065 | Kathmandu University                                                                   | Nepal Health Research Council                                                          | Pradip Gyanwali et al     |
| EPI_ISL_754073 | National Public Health Laboratory                                                      | Nepal Health Research Council                                                          | Pradip Gyanwali et al     |
| EPI_ISL_754071 | Nepal Korea Friendship Municipality Hospital                                           | Nepal Health Research Council                                                          | Pradip Gyanwali et al     |
| EPI_ISL_413570 | RIVM                                                                                   | Erasmus Medical Center                                                                 | David Nieuwenhuijse et al |
| EPI_ISL_965529 | Dutch COVID-19 response team                                                           | Medical Microbiology, Maastricht University Medical Centre                             | Jozef Dingemans* et al    |
| EPI_ISL_523177 | Dutch COVID-19 response team                                                           | Erasmus Medical Center                                                                 | Bas Oude Munnink et al    |
| EPI_ISL_523196 | Dutch COVID-19 response team                                                           | Erasmus Medical Center                                                                 | Bas Oude Munnink et al    |
| EPI_ISL_523211 | Dutch COVID-19 response team                                                           | Erasmus Medical Center                                                                 | Bas Oude Munnink et al    |
| EPI_ISL_801455 | Dutch COVID-19 response team                                                           | Erasmus Medical Center                                                                 | Bas Oude Munnink et al    |
| EPI_ISL_636533 | Dutch COVID-19 response team                                                           | National Institute for Public Health and the Environment (RIVM)                        | Adam Meijer et al         |

|                |                              |                                                                 |                           |
|----------------|------------------------------|-----------------------------------------------------------------|---------------------------|
| EPI_ISL_723369 | Dutch COVID-19 response team | National Institute for Public Health and the Environment (RIVM) | Adam Meijer et al         |
| EPI_ISL_728741 | Dutch COVID-19 response team | National Institute for Public Health and the Environment (RIVM) | Adam Meijer et al         |
| EPI_ISL_413574 | MHC West-Brabant             | Erasmus Medical Center                                          | David Nieuwenhuijse et al |
| EPI_ISL_722726 | Dutch COVID-19 response team | Erasmus Medical Center                                          | Bas Oude Munnink et al    |
| EPI_ISL_722727 | Dutch COVID-19 response team | Erasmus Medical Center                                          | Bas Oude Munnink et al    |
| EPI_ISL_722719 | Dutch COVID-19 response team | Erasmus Medical Center                                          | Bas Oude Munnink et al    |
| EPI_ISL_722698 | Dutch COVID-19 response team | Erasmus Medical Center                                          | Bas Oude Munnink et al    |
| EPI_ISL_722732 | Dutch COVID-19 response team | Erasmus Medical Center                                          | Bas Oude Munnink et al    |
| EPI_ISL_904434 | Dutch COVID-19 response team | Erasmus Medical Center                                          | Bas Oude Munnink et al    |
| EPI_ISL_965670 | Dutch COVID-19 response team | Medical Microbiology, Maastricht University Medical Centre      | Jozef Dingemans* et al    |
| EPI_ISL_965609 | Dutch COVID-19 response team | Medical Microbiology, Maastricht University Medical Centre      | Jozef Dingemans* et al    |
| EPI_ISL_965611 | Dutch COVID-19 response team | Medical Microbiology, Maastricht University Medical Centre      | Jozef Dingemans* et al    |
| EPI_ISL_965603 | Dutch COVID-19 response team | Medical Microbiology, Maastricht University Medical Centre      | Jozef Dingemans* et al    |
| EPI_ISL_965542 | Dutch COVID-19 response team | Medical Microbiology, Maastricht University Medical Centre      | Jozef Dingemans* et al    |
| EPI_ISL_965645 | Dutch COVID-19 response team | Medical Microbiology, Maastricht University Medical Centre      | Jozef Dingemans* et al    |
| EPI_ISL_965678 | Dutch COVID-19 response team | Medical Microbiology, Maastricht University Medical Centre      | Jozef Dingemans* et al    |
| EPI_ISL_965679 | Dutch COVID-19 response team | Medical Microbiology, Maastricht University Medical Centre      | Jozef Dingemans* et al    |
| EPI_ISL_455127 | Dutch COVID-19 response team | Erasmus Medical Center                                          | Bas Oude Munnink et al    |
| EPI_ISL_455159 | Dutch COVID-19 response team | Erasmus Medical Center                                          | Bas Oude Munnink et al    |
| EPI_ISL_455177 | Dutch COVID-19 response team | Erasmus Medical Center                                          | Bas Oude Munnink et al    |
| EPI_ISL_455226 | Dutch COVID-19 response team | Erasmus Medical Center                                          | Bas Oude Munnink et al    |
| EPI_ISL_455227 | Dutch COVID-19 response team | Erasmus Medical Center                                          | Bas Oude Munnink et al    |
| EPI_ISL_455228 | Dutch COVID-19 response team | Erasmus Medical Center                                          | Bas Oude Munnink et al    |
| EPI_ISL_455231 | Dutch COVID-19 response team | Erasmus Medical Center                                          | Bas Oude Munnink et al    |
| EPI_ISL_455232 | Dutch COVID-19 response team | Erasmus Medical Center                                          | Bas Oude Munnink et al    |
| EPI_ISL_455234 | Dutch COVID-19 response team | Erasmus Medical Center                                          | Bas Oude Munnink et al    |
| EPI_ISL_455289 | Dutch COVID-19 response team | Erasmus Medical Center                                          | Bas Oude Munnink et al    |
| EPI_ISL_461085 | Dutch COVID-19 response team | Erasmus Medical Center                                          | Bas Oude Munnink et al    |
| EPI_ISL_461143 | Dutch COVID-19 response team | Erasmus Medical Center                                          | Bas Oude Munnink et al    |
| EPI_ISL_523372 | Dutch COVID-19 response team | Erasmus Medical Center                                          | Bas Oude Munnink et al    |
| EPI_ISL_523373 | Dutch COVID-19 response team | Erasmus Medical Center                                          | Bas Oude Munnink et al    |
| EPI_ISL_722811 | Dutch COVID-19 response team | Erasmus Medical Center                                          | Bas Oude Munnink et al    |
| EPI_ISL_904838 | Dutch COVID-19 response team | National Institute for Public Health and the Environment (RIVM) | Adam Meijer et al         |
| EPI_ISL_943398 | Dutch COVID-19 response team | National Institute for Public Health and the Environment (RIVM) | Adam Meijer et al         |
| EPI_ISL_577859 | Dutch COVID-19 response team | Erasmus Medical Center                                          | Bas Oude Munnink et al    |
| EPI_ISL_632340 | Dutch COVID-19 response team | Erasmus Medical Center                                          | Bas Oude Munnink et al    |
| EPI_ISL_547499 | Dutch COVID-19 response team | National Institute for Public Health and the Environment (RIVM) | Adam Meijer et al         |
| EPI_ISL_804443 | Dutch COVID-19 response team | National Institute for Public Health and the Environment (RIVM) | Adam Meijer et al         |
| EPI_ISL_804405 | Dutch COVID-19 response team | National Institute for Public Health and the Environment (RIVM) | Adam Meijer et al         |



|                |                                |                                                                 |                        |
|----------------|--------------------------------|-----------------------------------------------------------------|------------------------|
| EPI_ISL_523682 | Dutch COVID-19 response team   | Erasmus Medical Center                                          | Bas Oude Munnink et al |
| EPI_ISL_523749 | Dutch COVID-19 response team   | Erasmus Medical Center                                          | Bas Oude Munnink et al |
| EPI_ISL_523761 | Dutch COVID-19 response team   | Erasmus Medical Center                                          | Bas Oude Munnink et al |
| EPI_ISL_523765 | Dutch COVID-19 response team   | Erasmus Medical Center                                          | Bas Oude Munnink et al |
| EPI_ISL_523776 | Dutch COVID-19 response team   | Erasmus Medical Center                                          | Bas Oude Munnink et al |
| EPI_ISL_523803 | Dutch COVID-19 response team   | Erasmus Medical Center                                          | Bas Oude Munnink et al |
| EPI_ISL_577950 | Dutch COVID-19 response team   | Erasmus Medical Center                                          | Bas Oude Munnink et al |
| EPI_ISL_577951 | Dutch COVID-19 response team   | Erasmus Medical Center                                          | Bas Oude Munnink et al |
| EPI_ISL_577953 | Dutch COVID-19 response team   | Erasmus Medical Center                                          | Bas Oude Munnink et al |
| EPI_ISL_577954 | Dutch COVID-19 response team   | Erasmus Medical Center                                          | Bas Oude Munnink et al |
| EPI_ISL_578060 | Dutch COVID-19 response team   | Erasmus Medical Center                                          | Bas Oude Munnink et al |
| EPI_ISL_632494 | Dutch COVID-19 response team   | Erasmus Medical Center                                          | Bas Oude Munnink et al |
| EPI_ISL_632414 | Dutch COVID-19 response team   | Erasmus Medical Center                                          | Bas Oude Munnink et al |
| EPI_ISL_632377 | Dutch COVID-19 response team   | Erasmus Medical Center                                          | Bas Oude Munnink et al |
| EPI_ISL_632701 | Dutch COVID-19 response team   | Erasmus Medical Center                                          | Bas Oude Munnink et al |
| EPI_ISL_722360 | Dutch COVID-19 response team   | Erasmus Medical Center                                          | Bas Oude Munnink et al |
| EPI_ISL_943262 | Dutch COVID-19 response team   | National Institute for Public Health and the Environment (RIVM) | Adam Meijer et al      |
| EPI_ISL_824158 | Dutch COVID-19 response team   | National Institute for Public Health and the Environment (RIVM) | Adam Meijer et al      |
| EPI_ISL_461255 | Dutch COVID-19 response team   | Erasmus Medical Center                                          | Bas Oude Munnink et al |
| EPI_ISL_461279 | Dutch COVID-19 response team   | Erasmus Medical Center                                          | Bas Oude Munnink et al |
| EPI_ISL_461323 | Dutch COVID-19 response team   | Erasmus Medical Center                                          | Bas Oude Munnink et al |
| EPI_ISL_461362 | Dutch COVID-19 response team   | Erasmus Medical Center                                          | Bas Oude Munnink et al |
| EPI_ISL_422924 | Dutch COVID-19 response team   | Erasmus Medical Center                                          | Bas Oude Munnink et al |
| EPI_ISL_523508 | Dutch COVID-19 response team   | Erasmus Medical Center                                          | Bas Oude Munnink et al |
| EPI_ISL_523511 | Dutch COVID-19 response team   | Erasmus Medical Center                                          | Bas Oude Munnink et al |
| EPI_ISL_548104 | LabTests                       | Institute of Environmental Science and Research (ESR)           | Xiaoyun Ren et al      |
| EPI_ISL_548105 | LabTests                       | Institute of Environmental Science and Research (ESR)           | Xiaoyun Ren et al      |
| EPI_ISL_547977 | LabTests                       | Institute of Environmental Science and Research (ESR)           | Xiaoyun Ren et al      |
| EPI_ISL_547984 | Canterbury Health Laboratories | Institute of Environmental Science and Research (ESR)           | Xiaoyun Ren et al      |
| EPI_ISL_547986 | LabTests                       | Institute of Environmental Science and Research (ESR)           | Xiaoyun Ren et al      |
| EPI_ISL_547993 | LabTests                       | Institute of Environmental Science and Research (ESR)           | Xiaoyun Ren et al      |
| EPI_ISL_548002 | Middlemore Hospital            | Institute of Environmental Science and Research (ESR)           | Xiaoyun Ren et al      |
| EPI_ISL_548004 | Middlemore Hospital            | Institute of Environmental Science and Research (ESR)           | Xiaoyun Ren et al      |
| EPI_ISL_548005 | Middlemore Hospital            | Institute of Environmental Science and Research (ESR)           | Xiaoyun Ren et al      |
| EPI_ISL_548011 | Middlemore Hospital            | Institute of Environmental Science and Research (ESR)           | Xiaoyun Ren et al      |
| EPI_ISL_548023 | LabPLUS                        | Institute of Environmental Science and Research (ESR)           | Xiaoyun Ren et al      |
| EPI_ISL_548040 | LabPLUS                        | Institute of Environmental Science and Research (ESR)           | Xiaoyun Ren et al      |
| EPI_ISL_548049 | LabPLUS                        | Institute of Environmental Science and Research (ESR)           | Xiaoyun Ren et al      |
| EPI_ISL_548064 | Waikato Hospital               | Institute of Environmental Science and Research (ESR)           | Xiaoyun Ren et al      |





|                |                                 |                                                       |                   |
|----------------|---------------------------------|-------------------------------------------------------|-------------------|
| EPI_ISL_707798 | LabPLUS                         | Institute of Environmental Science and Research (ESR) | Xiaoyun Ren et al |
| EPI_ISL_707801 | LabPLUS                         | Institute of Environmental Science and Research (ESR) | Xiaoyun Ren et al |
| EPI_ISL_707805 | LabPLUS                         | Institute of Environmental Science and Research (ESR) | Xiaoyun Ren et al |
| EPI_ISL_707806 | Middlemore Hospital             | Institute of Environmental Science and Research (ESR) | Xiaoyun Ren et al |
| EPI_ISL_707807 | Middlemore Hospital             | Institute of Environmental Science and Research (ESR) | Xiaoyun Ren et al |
| EPI_ISL_732968 | Middlemore Hospital             | Institute of Environmental Science and Research (ESR) | Xiaoyun Ren et al |
| EPI_ISL_732970 | Middlemore Hospital             | Institute of Environmental Science and Research (ESR) | Xiaoyun Ren et al |
| EPI_ISL_755624 | Middlemore Hospital             | Institute of Environmental Science and Research (ESR) | Xiaoyun Ren et al |
| EPI_ISL_755626 | PathLab Bay of Plenty           | Institute of Environmental Science and Research (ESR) | Xiaoyun Ren et al |
| EPI_ISL_755630 | LabPLUS                         | Institute of Environmental Science and Research (ESR) | Xiaoyun Ren et al |
| EPI_ISL_755632 | LabPLUS                         | Institute of Environmental Science and Research (ESR) | Xiaoyun Ren et al |
| EPI_ISL_413490 | Auckland Hospital               | Institute of Environmental Science and Research (ESR) | Matt Storey et al |
| EPI_ISL_579118 | Waikato Hospital                | Institute of Environmental Science and Research (ESR) | Xiaoyun Ren et al |
| EPI_ISL_456168 | Waikato Hospital                | Institute of Environmental Science and Research (ESR) | Matt Storey et al |
| EPI_ISL_456181 | Southern Community Labs Dunedin | Institute of Environmental Science and Research (ESR) | Matt Storey et al |
| EPI_ISL_456197 | LabPLUS                         | Institute of Environmental Science and Research (ESR) | Matt Storey et al |
| EPI_ISL_456202 | LabPLUS                         | Institute of Environmental Science and Research (ESR) | Matt Storey et al |
| EPI_ISL_456251 | Southern Community Labs Dunedin | Institute of Environmental Science and Research (ESR) | Matt Storey et al |
| EPI_ISL_456258 | Middlemore Hospital             | Institute of Environmental Science and Research (ESR) | Matt Storey et al |
| EPI_ISL_579138 | Southern Community Labs Dunedin | Institute of Environmental Science and Research (ESR) | Xiaoyun Ren et al |
| EPI_ISL_579139 | Southern Community Labs Dunedin | Institute of Environmental Science and Research (ESR) | Xiaoyun Ren et al |
| EPI_ISL_456301 | PathLab Bay of Plenty           | Institute of Environmental Science and Research (ESR) | Matt Storey et al |
| EPI_ISL_579174 | Southern Community Labs Dunedin | Institute of Environmental Science and Research (ESR) | Xiaoyun Ren et al |
| EPI_ISL_579220 | Canterbury Health Laboratories  | Institute of Environmental Science and Research (ESR) | Xiaoyun Ren et al |
| EPI_ISL_548124 | Middlemore Hospital             | Institute of Environmental Science and Research (ESR) | Xiaoyun Ren et al |
| EPI_ISL_456384 | LabPLUS                         | Institute of Environmental Science and Research (ESR) | Matt Storey et al |
| EPI_ISL_579305 | Middlemore Hospital             | Institute of Environmental Science and Research (ESR) | Xiaoyun Ren et al |
| EPI_ISL_456388 | LabPLUS                         | Institute of Environmental Science and Research (ESR) | Matt Storey et al |
| EPI_ISL_456393 | LabPLUS                         | Institute of Environmental Science and Research (ESR) | Matt Storey et al |
| EPI_ISL_456394 | LabPLUS                         | Institute of Environmental Science and Research (ESR) | Matt Storey et al |
| EPI_ISL_579403 | LabPLUS                         | Institute of Environmental Science and Research (ESR) | Xiaoyun Ren et al |
| EPI_ISL_579406 | North Shore Hospital            | Institute of Environmental Science and Research (ESR) | Xiaoyun Ren et al |
| EPI_ISL_579407 | North Shore Hospital            | Institute of Environmental Science and Research (ESR) | Xiaoyun Ren et al |
| EPI_ISL_579422 | LabTests                        | Institute of Environmental Science and Research (ESR) | Xiaoyun Ren et al |
| EPI_ISL_579425 | LabPLUS                         | Institute of Environmental Science and Research (ESR) | Xiaoyun Ren et al |
| EPI_ISL_579426 | Canterbury Health Laboratories  | Institute of Environmental Science and Research (ESR) | Xiaoyun Ren et al |
| EPI_ISL_579458 | Canterbury Health Laboratories  | Institute of Environmental Science and Research (ESR) | Xiaoyun Ren et al |
| EPI_ISL_579465 | Canterbury Health Laboratories  | Institute of Environmental Science and Research (ESR) | Xiaoyun Ren et al |
| EPI_ISL_579466 | Canterbury Health Laboratories  | Institute of Environmental Science and Research (ESR) | Xiaoyun Ren et al |

|                |                                                |                                                                                                                            |                             |
|----------------|------------------------------------------------|----------------------------------------------------------------------------------------------------------------------------|-----------------------------|
| EPI_ISL_579496 | Canterbury Health Laboratories                 | Institute of Environmental Science and Research (ESR)                                                                      | Xiaoyun Ren et al           |
| EPI_ISL_548130 | Middlemore Hospital                            | Institute of Environmental Science and Research (ESR)                                                                      | Xiaoyun Ren et al           |
| EPI_ISL_548132 | Middlemore Hospital                            | Institute of Environmental Science and Research (ESR)                                                                      | Xiaoyun Ren et al           |
| EPI_ISL_548133 | Middlemore Hospital                            | Institute of Environmental Science and Research (ESR)                                                                      | Xiaoyun Ren et al           |
| EPI_ISL_548138 | Canterbury Health Laboratories                 | Institute of Environmental Science and Research (ESR)                                                                      | Xiaoyun Ren et al           |
| EPI_ISL_548139 | Canterbury Health Laboratories                 | Institute of Environmental Science and Research (ESR)                                                                      | Xiaoyun Ren et al           |
| EPI_ISL_548140 | Canterbury Health Laboratories                 | Institute of Environmental Science and Research (ESR)                                                                      | Xiaoyun Ren et al           |
| EPI_ISL_548145 | Middlemore Hospital                            | Institute of Environmental Science and Research (ESR)                                                                      | Xiaoyun Ren et al           |
| EPI_ISL_548101 | Waikato Hospital                               | Institute of Environmental Science and Research (ESR)                                                                      | Xiaoyun Ren et al           |
| EPI_ISL_843193 | LabPLUS                                        | Institute of Environmental Science and Research (ESR)                                                                      | Xiaoyun Ren et al           |
| EPI_ISL_794612 | LabPLUS                                        | Institute of Environmental Science and Research (ESR)                                                                      | Xiaoyun Ren et al           |
| EPI_ISL_794613 | LabPLUS                                        | Institute of Environmental Science and Research (ESR)                                                                      | Xiaoyun Ren et al           |
| EPI_ISL_794615 | LabPLUS                                        | Institute of Environmental Science and Research (ESR)                                                                      | Xiaoyun Ren et al           |
| EPI_ISL_794616 | LabPLUS                                        | Institute of Environmental Science and Research (ESR)                                                                      | Xiaoyun Ren et al           |
| EPI_ISL_794617 | LabPLUS                                        | Institute of Environmental Science and Research (ESR)                                                                      | Xiaoyun Ren et al           |
| EPI_ISL_794618 | LabPLUS                                        | Institute of Environmental Science and Research (ESR)                                                                      | Xiaoyun Ren et al           |
| EPI_ISL_794619 | LabPLUS                                        | Institute of Environmental Science and Research (ESR)                                                                      | Xiaoyun Ren et al           |
| EPI_ISL_794625 | Middlemore Hospital                            | Institute of Environmental Science and Research (ESR)                                                                      | Xiaoyun Ren et al           |
| EPI_ISL_794627 | Canterbury Health Laboratories                 | Institute of Environmental Science and Research (ESR)                                                                      | Xiaoyun Ren et al           |
| EPI_ISL_843195 | Canterbury Health Laboratories                 | Institute of Environmental Science and Research (ESR)                                                                      | Xiaoyun Ren et al           |
| EPI_ISL_877205 | LabPLUS                                        | Institute of Environmental Science and Research (ESR)                                                                      | Xiaoyun Ren et al           |
| EPI_ISL_877209 | LabPLUS                                        | Institute of Environmental Science and Research (ESR)                                                                      | Xiaoyun Ren et al           |
| EPI_ISL_877211 | LabPLUS                                        | Institute of Environmental Science and Research (ESR)                                                                      | Xiaoyun Ren et al           |
| EPI_ISL_877212 | LabPLUS                                        | Institute of Environmental Science and Research (ESR)                                                                      | Xiaoyun Ren et al           |
| EPI_ISL_877216 | Middlemore Hospital                            | Institute of Environmental Science and Research (ESR)                                                                      | Xiaoyun Ren et al           |
| EPI_ISL_877220 | Canterbury Health Laboratories                 | Institute of Environmental Science and Research (ESR)                                                                      | Xiaoyun Ren et al           |
| EPI_ISL_877221 | LabPLUS                                        | Institute of Environmental Science and Research (ESR)                                                                      | Xiaoyun Ren et al           |
| EPI_ISL_877223 | LabPLUS                                        | Institute of Environmental Science and Research (ESR)                                                                      | Xiaoyun Ren et al           |
| EPI_ISL_877224 | LabPLUS                                        | Institute of Environmental Science and Research (ESR)                                                                      | Xiaoyun Ren et al           |
| EPI_ISL_877226 | LabPLUS                                        | Institute of Environmental Science and Research (ESR)                                                                      | Xiaoyun Ren et al           |
| EPI_ISL_729952 | Nigeria Centre for Disease Control (NCDC)      | Nigeria Centre of Excellence for Genomics of Infectious Diseases (ACEGID), Redeemer's University, Ede, Osun State, Nigeria | Oluniyi P.E. et al et al    |
| EPI_ISL_729953 | Nigeria Centre for Disease Control (NCDC)      | Nigeria Centre of Excellence for Genomics of Infectious Diseases (ACEGID), Redeemer's University, Ede, Osun State, Nigeria | Oluniyi P.E. et al et al    |
| EPI_ISL_729955 | Nigeria Centre for Disease Control (NCDC)      | Nigeria Centre of Excellence for Genomics of Infectious Diseases (ACEGID), Redeemer's University, Ede, Osun State, Nigeria | Oluniyi P.E. et al et al    |
| EPI_ISL_729956 | Nigeria Centre for Disease Control (NCDC)      | Nigeria Centre of Excellence for Genomics of Infectious Diseases (ACEGID), Redeemer's University, Ede, Osun State, Nigeria | Oluniyi P.E. et al et al    |
| EPI_ISL_729993 | Nigeria Centre for Disease Control (NCDC)      | Nigeria Centre of Excellence for Genomics of Infectious Diseases (ACEGID), Redeemer's University, Ede, Osun State, Nigeria | Oluniyi P.E. et al et al    |
| EPI_ISL_985129 | Biorepository and Clinical Virology Laboratory | Ozer Lab                                                                                                                   | Ramon Lorenzo-Redondo et al |
| EPI_ISL_985237 | Biorepository and Clinical Virology Laboratory | Ozer Lab                                                                                                                   | Ramon Lorenzo-Redondo et al |



|                |                                                                                                                                                                                                                     |                                                                                                                            |                          |
|----------------|---------------------------------------------------------------------------------------------------------------------------------------------------------------------------------------------------------------------|----------------------------------------------------------------------------------------------------------------------------|--------------------------|
| EPI_ISL_729933 | Nigeria Centre for Disease Control (NCDC)                                                                                                                                                                           | African Centre of Excellence for Genomics of Infectious Diseases (ACEGID), Redeemer's University, Ede, Osun State, Nigeria | Oluniyi P.E. et al et al |
| EPI_ISL_730020 | Nigeria Centre for Disease Control (NCDC)                                                                                                                                                                           | African Centre of Excellence for Genomics of Infectious Diseases (ACEGID), Redeemer's University, Ede, Osun State, Nigeria | Oluniyi P.E. et al et al |
| EPI_ISL_730025 | Nigeria Centre for Disease Control (NCDC)                                                                                                                                                                           | African Centre of Excellence for Genomics of Infectious Diseases (ACEGID), Redeemer's University, Ede, Osun State, Nigeria | Oluniyi P.E. et al et al |
| EPI_ISL_730026 | Nigeria Centre for Disease Control (NCDC)                                                                                                                                                                           | African Centre of Excellence for Genomics of Infectious Diseases (ACEGID), Redeemer's University, Ede, Osun State, Nigeria | Oluniyi P.E. et al et al |
| EPI_ISL_872601 | Nigeria Centre for Disease Control (NCDC)                                                                                                                                                                           | African Centre of Excellence for Genomics of Infectious Diseases (ACEGID), Redeemer's University                           | Oluniyi P.E. et al et al |
| EPI_ISL_872602 | Nigeria Centre for Disease Control (NCDC)                                                                                                                                                                           | African Centre of Excellence for Genomics of Infectious Diseases (ACEGID), Redeemer's University                           | Oluniyi P.E. et al et al |
| EPI_ISL_872603 | Nigeria Centre for Disease Control (NCDC)                                                                                                                                                                           | African Centre of Excellence for Genomics of Infectious Diseases (ACEGID), Redeemer's University                           | Oluniyi P.E. et al et al |
| EPI_ISL_872604 | Nigeria Centre for Disease Control (NCDC)                                                                                                                                                                           | African Centre of Excellence for Genomics of Infectious Diseases (ACEGID), Redeemer's University                           | Oluniyi P.E. et al et al |
| EPI_ISL_872606 | Nigeria Centre for Disease Control (NCDC)                                                                                                                                                                           | African Centre of Excellence for Genomics of Infectious Diseases (ACEGID), Redeemer's University                           | Oluniyi P.E. et al et al |
| EPI_ISL_872607 | Nigeria Centre for Disease Control (NCDC)                                                                                                                                                                           | African Centre of Excellence for Genomics of Infectious Diseases (ACEGID), Redeemer's University                           | Oluniyi P.E. et al et al |
| EPI_ISL_872608 | Nigeria Centre for Disease Control (NCDC)                                                                                                                                                                           | African Centre of Excellence for Genomics of Infectious Diseases (ACEGID), Redeemer's University                           | Oluniyi P.E. et al et al |
| EPI_ISL_872611 | Nigeria Centre for Disease Control (NCDC)                                                                                                                                                                           | African Centre of Excellence for Genomics of Infectious Diseases (ACEGID), Redeemer's University                           | Oluniyi P.E. et al et al |
| EPI_ISL_872614 | Nigeria Centre for Disease Control (NCDC)                                                                                                                                                                           | African Centre of Excellence for Genomics of Infectious Diseases (ACEGID), Redeemer's University                           | Oluniyi P.E. et al et al |
| EPI_ISL_872615 | Nigeria Centre for Disease Control (NCDC)                                                                                                                                                                           | African Centre of Excellence for Genomics of Infectious Diseases (ACEGID), Redeemer's University                           | Oluniyi P.E. et al et al |
| EPI_ISL_872616 | Nigeria Centre for Disease Control (NCDC)                                                                                                                                                                           | African Centre of Excellence for Genomics of Infectious Diseases (ACEGID), Redeemer's University                           | Oluniyi P.E. et al et al |
| EPI_ISL_872623 | Nigeria Centre for Disease Control (NCDC)                                                                                                                                                                           | African Centre of Excellence for Genomics of Infectious Diseases (ACEGID), Redeemer's University                           | Oluniyi P.E. et al et al |
| EPI_ISL_730048 | Nigeria Centre for Disease Control (NCDC)                                                                                                                                                                           | African Centre of Excellence for Genomics of Infectious Diseases (ACEGID), Redeemer's University, Ede, Osun State, Nigeria | Oluniyi P.E. et al et al |
| EPI_ISL_455362 | Nigeria Centre for Disease Control (NCDC)                                                                                                                                                                           | African Centre of Excellence for Genomics of Infectious Diseases (ACEGID), Redeemer's University, Ede, Osun State, Nigeria | Oluniyi P.E. et al       |
| EPI_ISL_729945 | Nigeria Centre for Disease Control (NCDC)                                                                                                                                                                           | African Centre of Excellence for Genomics of Infectious Diseases (ACEGID), Redeemer's University, Ede, Osun State, Nigeria | Oluniyi P.E. et al et al |
| EPI_ISL_729946 | Nigeria Centre for Disease Control (NCDC)                                                                                                                                                                           | African Centre of Excellence for Genomics of Infectious Diseases (ACEGID), Redeemer's University, Ede, Osun State, Nigeria | Oluniyi P.E. et al et al |
| EPI_ISL_729950 | Nigeria Centre for Disease Control (NCDC)                                                                                                                                                                           | African Centre of Excellence for Genomics of Infectious Diseases (ACEGID), Redeemer's University, Ede, Osun State, Nigeria | Oluniyi P.E. et al et al |
| EPI_ISL_730042 | Nigeria Centre for Disease Control (NCDC)                                                                                                                                                                           | African Centre of Excellence for Genomics of Infectious Diseases (ACEGID), Redeemer's University, Ede, Osun State, Nigeria | Oluniyi P.E. et al et al |
| EPI_ISL_413550 | Centre for Human and Zoonotic Virology (CHAZVY), College of Medicine University of Lagos/Lagos University Teaching Hospital (LUTH), part of the Laboratory Network of the Nigeria Centre for Disease Control (NCDC) | African Centre of Excellence for Genomics of Infectious Diseases (ACEGID), Redeemer's University, Ede, Osun State, Nigeria | Oluniyi P.E. et al       |
| EPI_ISL_737200 | National Reference Laboratory, Nigeria Centre for Disease Control.                                                                                                                                                  | National Reference Laboratory, Nigeria Centre for Disease Control, Gaduwa, Abuja, Nigeria                                  | Dr Ndodo Nnaemeka et al  |
| EPI_ISL_766051 | Nigeria Centre For Disease Control,                                                                                                                                                                                 | National reference Laboratory, NCDC, Gaduwa, Abuja                                                                         | Dr Ndodo Nnaemeka et al  |

|                |                                                  |                                                                                                                    |                          |
|----------------|--------------------------------------------------|--------------------------------------------------------------------------------------------------------------------|--------------------------|
| EPI_ISL_825714 | Nigeria Centre For Disease Control               | Nigeria National Reference Laboratory, NCDC, Gashua, Abuja                                                         | Dr Ndodo Nnaemeka et al  |
| EPI_ISL_729922 | Nigeria Centre for Disease Control (NCDC)        | Nigeria Centre of Excellence for Genomics of Infectious Diseases (ACEGID), Redeemer's University, Ede, Osun State, | Oluniyi P.E. et al et al |
| EPI_ISL_729929 | Nigeria Centre for Disease Control (NCDC)        | Nigeria Centre of Excellence for Genomics of Infectious Diseases (ACEGID), Redeemer's University, Ede, Osun State, | Oluniyi P.E. et al et al |
| EPI_ISL_729944 | Nigeria Centre for Disease Control (NCDC)        | Nigeria Centre of Excellence for Genomics of Infectious Diseases (ACEGID), Redeemer's University, Ede, Osun State, | Oluniyi P.E. et al et al |
| EPI_ISL_455412 | Nigeria Centre for Disease Control (NCDC)        | Nigeria Centre of Excellence for Genomics of Infectious Diseases (ACEGID), Redeemer's University, Ede, Osun State, | Oluniyi P.E. et al       |
| EPI_ISL_487106 | Nigeria Centre for Disease Control (NCDC)        | Nigeria Centre of Excellence for Genomics of Infectious Diseases (ACEGID), Redeemer's University, Ede, Osun State, | Oluniyi P.E. et al       |
| EPI_ISL_527889 | Nigeria Centre for Disease Control (NCDC)        | Nigeria Centre of Excellence for Genomics of Infectious Diseases (ACEGID), Redeemer's University, Ede, Osun State, | Oluniyi P.E. et al et al |
| EPI_ISL_527892 | Nigeria Centre for Disease Control (NCDC)        | Nigeria Centre of Excellence for Genomics of Infectious Diseases (ACEGID), Redeemer's University, Ede, Osun State, | Oluniyi P.E. et al et al |
| EPI_ISL_729968 | Nigeria Centre for Disease Control (NCDC)        | Nigeria Centre of Excellence for Genomics of Infectious Diseases (ACEGID), Redeemer's University, Ede, Osun State, | Oluniyi P.E. et al et al |
| EPI_ISL_729970 | Nigeria Centre for Disease Control (NCDC)        | Nigeria Centre of Excellence for Genomics of Infectious Diseases (ACEGID), Redeemer's University, Ede, Osun State, | Oluniyi P.E. et al et al |
| EPI_ISL_729972 | Nigeria Centre for Disease Control (NCDC)        | Nigeria Centre of Excellence for Genomics of Infectious Diseases (ACEGID), Redeemer's University, Ede, Osun State, | Oluniyi P.E. et al et al |
| EPI_ISL_729974 | Nigeria Centre for Disease Control (NCDC)        | Nigeria Centre of Excellence for Genomics of Infectious Diseases (ACEGID), Redeemer's University, Ede, Osun State, | Oluniyi P.E. et al et al |
| EPI_ISL_729977 | Nigeria Centre for Disease Control (NCDC)        | Nigeria Centre of Excellence for Genomics of Infectious Diseases (ACEGID), Redeemer's University, Ede, Osun State, | Oluniyi P.E. et al et al |
| EPI_ISL_729978 | Nigeria Centre for Disease Control (NCDC)        | Nigeria Centre of Excellence for Genomics of Infectious Diseases (ACEGID), Redeemer's University, Ede, Osun State, | Oluniyi P.E. et al et al |
| EPI_ISL_729979 | Nigeria Centre for Disease Control (NCDC)        | Nigeria Centre of Excellence for Genomics of Infectious Diseases (ACEGID), Redeemer's University, Ede, Osun State, | Oluniyi P.E. et al et al |
| EPI_ISL_729980 | Nigeria Centre for Disease Control (NCDC)        | Nigeria Centre of Excellence for Genomics of Infectious Diseases (ACEGID), Redeemer's University, Ede, Osun State, | Oluniyi P.E. et al et al |
| EPI_ISL_729982 | Nigeria Centre for Disease Control (NCDC)        | Nigeria Centre of Excellence for Genomics of Infectious Diseases (ACEGID), Redeemer's University, Ede, Osun State, | Oluniyi P.E. et al et al |
| EPI_ISL_729984 | Nigeria Centre for Disease Control (NCDC)        | Nigeria Centre of Excellence for Genomics of Infectious Diseases (ACEGID), Redeemer's University, Ede, Osun State, | Oluniyi P.E. et al et al |
| EPI_ISL_729985 | Nigeria Centre for Disease Control (NCDC)        | Nigeria Centre of Excellence for Genomics of Infectious Diseases (ACEGID), Redeemer's University, Ede, Osun State, | Oluniyi P.E. et al et al |
| EPI_ISL_455413 | Nigeria Centre for Disease Control (NCDC)        | Nigeria Centre of Excellence for Genomics of Infectious Diseases (ACEGID), Redeemer's University, Ede, Osun State, | Oluniyi P.E. et al       |
| EPI_ISL_527893 | Nigeria Centre for Disease Control (NCDC)        | Nigeria Centre of Excellence for Genomics of Infectious Diseases (ACEGID), Redeemer's University, Ede, Osun State, | Oluniyi P.E. et al et al |
| EPI_ISL_487110 | Nigeria Centre for Disease Control (NCDC)        | Nigeria Centre of Excellence for Genomics of Infectious Diseases (ACEGID), Redeemer's University, Ede, Osun State, | Oluniyi P.E. et al       |
| EPI_ISL_487109 | Nigeria Centre for Disease Control (NCDC)        | Nigeria Centre of Excellence for Genomics of Infectious Diseases (ACEGID), Redeemer's University, Ede, Osun State, | Oluniyi P.E. et al       |
| EPI_ISL_455429 | Nigeria Centre for Disease Control (NCDC)        | Nigeria Centre of Excellence for Genomics of Infectious Diseases (ACEGID), Redeemer's University, Ede, Osun State, | Oluniyi P.E. et al       |
| EPI_ISL_455431 | Nigeria Centre for Disease Control (NCDC)        | Nigeria Research Center for Genetic Engineering and Biotechnology                                                  | Oluniyi P.E. et al       |
| EPI_ISL_678251 | Institute for Lung Diseases in Children - Skopje | "Georgi D. Efremov" , Macedonian Academy of Sciences and Arts                                                      | RCGEB - MASA et al       |

|                |                                                  |                                                                                                                        |                              |
|----------------|--------------------------------------------------|------------------------------------------------------------------------------------------------------------------------|------------------------------|
| EPI_ISL_678252 | General Hospital - Kumanovo                      | Research Center for Genetic Engineering and Biotechnology "Georgi D. Efremov", Macedonian Academy of Sciences and Arts | RCGEB - MASA et al           |
| EPI_ISL_678253 | Institute for Lung Diseases in Children - Skopje | Research Center for Genetic Engineering and Biotechnology "Georgi D. Efremov", Macedonian Academy of Sciences and Arts | RCGEB - MASA et al           |
| EPI_ISL_678254 | General Hospital - Strumica                      | Research Center for Genetic Engineering and Biotechnology "Georgi D. Efremov", Macedonian Academy of Sciences and Arts | RCGEB - MASA et al           |
| EPI_ISL_678255 | General Hospital - Ohrid                         | Research Center for Genetic Engineering and Biotechnology "Georgi D. Efremov", Macedonian Academy of Sciences and Arts | RCGEB - MASA et al           |
| EPI_ISL_678256 | General Hospital - Ohrid                         | Research Center for Genetic Engineering and Biotechnology "Georgi D. Efremov", Macedonian Academy of Sciences and Arts | RCGEB - MASA et al           |
| EPI_ISL_678257 | PHI Institute of Nephrology - Struga             | Research Center for Genetic Engineering and Biotechnology "Georgi D. Efremov", Macedonian Academy of Sciences and Arts | RCGEB - MASA et al           |
| EPI_ISL_678258 | General Hospital - Prilep                        | Research Center for Genetic Engineering and Biotechnology "Georgi D. Efremov", Macedonian Academy of Sciences and Arts | RCGEB - MASA et al           |
| EPI_ISL_678260 | General Hospital - Struga                        | Research Center for Genetic Engineering and Biotechnology "Georgi D. Efremov", Macedonian Academy of Sciences and Arts | RCGEB - MASA et al           |
| EPI_ISL_956404 | General Hospital - Strumica                      | Research Center for Genetic Engineering and Biotechnology "Georgi D. Efremov", Macedonian Academy of Sciences and Arts | Aleksandar J. Dimovski et al |
| EPI_ISL_909736 | General Hospital - Struga                        | Research Center for Genetic Engineering and Biotechnology "Georgi D. Efremov", Macedonian Academy of Sciences and Arts | RCGEB - MASA et al           |
| EPI_ISL_909738 | General Hospital - Bitola                        | Research Center for Genetic Engineering and Biotechnology "Georgi D. Efremov", Macedonian Academy of Sciences and Arts | RCGEB - MASA et al           |
| EPI_ISL_909739 | General Hospital - Prilep                        | Research Center for Genetic Engineering and Biotechnology "Georgi D. Efremov", Macedonian Academy of Sciences and Arts | RCGEB - MASA et al           |
| EPI_ISL_909740 | General Hospital - Ohrid                         | Research Center for Genetic Engineering and Biotechnology "Georgi D. Efremov", Macedonian Academy of Sciences and Arts | RCGEB - MASA et al           |
| EPI_ISL_939644 | Laboratory of Virology and Molecular Diagnostics | Institute of Public Health of Republic of North Macedonia<br>Laboratory of Virology and Molecular Diagnostics          | Maja Kuzmanovska et al       |
| EPI_ISL_910327 | General Hospital - Kumanovo                      | Research Center for Genetic Engineering and Biotechnology "Georgi D. Efremov", Macedonian Academy of Sciences and Arts | RCGEB - MASA et al           |
| EPI_ISL_918486 | General Hospital - Struga                        | Research Center for Genetic Engineering and Biotechnology "Georgi D. Efremov", Macedonian Academy of Sciences and Arts | RCGEB - MASA et al           |
| EPI_ISL_939649 | Laboratory of Virology and Molecular Diagnostics | Institute of Public Health of Republic of North Macedonia<br>Laboratory of Virology and Molecular Diagnostics          | Maja Kuzmanovska et al       |
| EPI_ISL_946913 | Laboratory of Virology and Molecular Diagnostics | Institute of Public Health of Republic of North Macedonia<br>Laboratory of Virology and Molecular Diagnostics          | Maja Kuzmanovska et al       |
| EPI_ISL_933713 | General Hospital - Prilep                        | Research Center for Genetic Engineering and Biotechnology "Georgi D. Efremov", Macedonian Academy of Sciences and Arts | RCGEB - MASA et al           |
| EPI_ISL_933720 | General Hospital - Tetovo                        | Research Center for Genetic Engineering and Biotechnology "Georgi D. Efremov", Macedonian Academy of Sciences and Arts | RCGEB - MASA et al           |
| EPI_ISL_933732 | Institution of Nefrology-Struga                  | Research Center for Genetic Engineering and Biotechnology "Georgi D. Efremov", Macedonian Academy of Sciences and Arts | RCGEB - MASA et al           |
| EPI_ISL_933775 | General Hospital - Ohrid                         | Research Center for Genetic Engineering and Biotechnology "Georgi D. Efremov", Macedonian Academy of Sciences and Arts | RCGEB - MASA et al           |
| EPI_ISL_933804 | Institute for Lung Diseases in Children - Skopje | Research Center for Genetic Engineering and Biotechnology "Georgi D. Efremov", Macedonian Academy of Sciences and Arts | RCGEB - MASA et al           |
| EPI_ISL_956416 | Laboratory of Virology and Molecular Diagnostics | Institute of Public Health of Republic of North Macedonia<br>Laboratory of Virology and Molecular Diagnostics          | Maja Kuzmanovska et al       |
| EPI_ISL_934314 | General Hospital - Bitola                        | Research Center for Genetic Engineering and Biotechnology "Georgi D. Efremov", Macedonian Academy of Sciences and Arts | RCGEB - MASA et al           |
| EPI_ISL_677675 | General Hospital - Veles                         | Research Center for Genetic Engineering and Biotechnology "Georgi D. Efremov", Macedonian Academy of Sciences and Arts | RCGEB - MASA et al           |

|                |                                                  |                                                                                                                        |                              |
|----------------|--------------------------------------------------|------------------------------------------------------------------------------------------------------------------------|------------------------------|
| EPI_ISL_934413 | General Hospital - Shtip                         | Research Center for Genetic Engineering and Biotechnology "Georgi D. Efremov", Macedonian Academy of Sciences and Arts | RCGEB - MASA et al           |
| EPI_ISL_934416 | Macedonian Academy of Sciences and Arts          | Research Center for Genetic Engineering and Biotechnology "Georgi D. Efremov", Macedonian Academy of Sciences and Arts | RCGEB - MASA et al           |
| EPI_ISL_514354 | General Hospital - Prilep                        | Research Center for Genetic Engineering and Biotechnology "Georgi D. Efremov", Macedonian Academy of Sciences and Arts | RCGEB - MASA et al           |
| EPI_ISL_677700 | Center for public health - Skopje                | Research Center for Genetic Engineering and Biotechnology "Georgi D. Efremov", Macedonian Academy of Sciences and Arts | RCGEB - MASA et al           |
| EPI_ISL_516414 | Center for public health - Skopje                | Research Center for Genetic Engineering and Biotechnology "Georgi D. Efremov", Macedonian Academy of Sciences and Arts | RCGEB - MASA et al           |
| EPI_ISL_934418 | General Hospital - Bitola                        | Research Center for Genetic Engineering and Biotechnology "Georgi D. Efremov", Macedonian Academy of Sciences and Arts | RCGEB - MASA et al           |
| EPI_ISL_943994 | General Hospital - Strumica                      | Research Center for Genetic Engineering and Biotechnology "Georgi D. Efremov", Macedonian Academy of Sciences and Arts | Aleksandar J. Dimovski et al |
| EPI_ISL_516415 | Center for public health - Skopje                | Research Center for Genetic Engineering and Biotechnology "Georgi D. Efremov", Macedonian Academy of Sciences and Arts | RCGEB - MASA et al           |
| EPI_ISL_943996 | General Hospital - Tetovo                        | Research Center for Genetic Engineering and Biotechnology "Georgi D. Efremov", Macedonian Academy of Sciences and Arts | Aleksandar J. Dimovski et al |
| EPI_ISL_944105 | General Hospital - Strumica                      | Research Center for Genetic Engineering and Biotechnology "Georgi D. Efremov", Macedonian Academy of Sciences and Arts | Aleksandar J. Dimovski et al |
| EPI_ISL_516416 | Center for public health - Skopje                | Research Center for Genetic Engineering and Biotechnology "Georgi D. Efremov", Macedonian Academy of Sciences and Arts | RCGEB - MASA et al           |
| EPI_ISL_516417 | Center for public health - Skopje                | Research Center for Genetic Engineering and Biotechnology "Georgi D. Efremov", Macedonian Academy of Sciences and Arts | RCGEB - MASA et al           |
| EPI_ISL_947678 | General Hospital - Tetovo                        | Research Center for Genetic Engineering and Biotechnology "Georgi D. Efremov", Macedonian Academy of Sciences and Arts | Aleksandar J. Dimovski et al |
| EPI_ISL_954265 | General Hospital - Prilep                        | Research Center for Genetic Engineering and Biotechnology "Georgi D. Efremov", Macedonian Academy of Sciences and Arts | Aleksandar J. Dimovski et al |
| EPI_ISL_954301 | Institute for Lung Diseases in Children - Skopje | Research Center for Genetic Engineering and Biotechnology "Georgi D. Efremov", Macedonian Academy of Sciences and Arts | Aleksandar J. Dimovski et al |
| EPI_ISL_954745 | General Hospital - Ohrid                         | Research Center for Genetic Engineering and Biotechnology "Georgi D. Efremov", Macedonian Academy of Sciences and Arts | Aleksandar J. Dimovski et al |
| EPI_ISL_959546 | Laboratory of Virology and Molecular Diagnostics | Institute of Public Health of Republic of North Macedonia Laboratory of Virology and Molecular Diagnostics             | Kuzmanovska M. et al         |
| EPI_ISL_956668 | General Hospital - Kumanovo                      | Research Center for Genetic Engineering and Biotechnology "Georgi D. Efremov", Macedonian Academy of Sciences and Arts | Aleksandar J. Dimovski et al |
| EPI_ISL_957423 | General Hospital - Bitola                        | Research Center for Genetic Engineering and Biotechnology "Georgi D. Efremov", Macedonian Academy of Sciences and Arts | Aleksandar J. Dimovski et al |
| EPI_ISL_677706 | Center for public health - Skopje                | Research Center for Genetic Engineering and Biotechnology "Georgi D. Efremov", Macedonian Academy of Sciences and Arts | RCGEB - MASA et al           |
| EPI_ISL_516421 | Center for public health - Skopje                | Research Center for Genetic Engineering and Biotechnology "Georgi D. Efremov", Macedonian Academy of Sciences and Arts | RCGEB - MASA et al           |
| EPI_ISL_959289 | General Hospital - Ohrid                         | Research Center for Genetic Engineering and Biotechnology "Georgi D. Efremov", Macedonian Academy of Sciences and Arts | Aleksandar J. Dimovski et al |
| EPI_ISL_959291 | General Hospital - Ohrid                         | Research Center for Genetic Engineering and Biotechnology "Georgi D. Efremov", Macedonian Academy of Sciences and Arts | Aleksandar J. Dimovski et al |
| EPI_ISL_962893 | Laboratory of Virology and Molecular Diagnostics | Institute of Public Health of Republic of North Macedonia Laboratory of Virology and Molecular Diagnostics             | Kuzmanovska M. et al         |
| EPI_ISL_962890 | Laboratory of Virology and Molecular Diagnostics | Institute of Public Health of Republic of North Macedonia Laboratory of Virology and Molecular Diagnostics             | Kuzmanovska M. et al         |
| EPI_ISL_516427 | Clinical Hospital - Shtip                        | Research Center for Genetic Engineering and Biotechnology "Georgi D. Efremov", Macedonian Academy of Sciences and Arts | RCGEB - MASA et al           |



|                |                                                                                          |                                                                                                                           |                               |
|----------------|------------------------------------------------------------------------------------------|---------------------------------------------------------------------------------------------------------------------------|-------------------------------|
| EPI_ISL_953426 | Laboratory of Virology and Molecular Diagnostics                                         | Institute of Public Health of Republic of North Macedonia<br>Laboratory of Virology and Molecular Diagnostics             | M. Kuzmanovska et al          |
| EPI_ISL_677715 | Clinical Hospital - Bitola                                                               | Research Center for Genetic Engineering and Biotechnology<br>"Georgi D. Efremov", Macedonian Academy of Sciences and Arts | RCGEB - MASA et al            |
| EPI_ISL_516430 | Clinical Hospital - Shtip                                                                | Research Center for Genetic Engineering and Biotechnology<br>"Georgi D. Efremov", Macedonian Academy of Sciences and Arts | RCGEB - MASA et al            |
| EPI_ISL_516431 | Clinical Hospital - Shtip                                                                | Research Center for Genetic Engineering and Biotechnology<br>"Georgi D. Efremov", Macedonian Academy of Sciences and Arts | RCGEB - MASA et al            |
| EPI_ISL_677717 | Clinical Hospital - Shtip                                                                | Research Center for Genetic Engineering and Biotechnology<br>"Georgi D. Efremov", Macedonian Academy of Sciences and Arts | RCGEB - MASA et al            |
| EPI_ISL_677718 | Clinical Hospital - Bitola                                                               | Research Center for Genetic Engineering and Biotechnology<br>"Georgi D. Efremov", Macedonian Academy of Sciences and Arts | RCGEB - MASA et al            |
| EPI_ISL_940766 | Laboratory of Virology and Molecular Diagnostics                                         | Institute of Public Health of Republic of North Macedonia<br>Laboratory of Virology and Molecular Diagnostics             | Maja Kuzmanovska et al        |
| EPI_ISL_677719 | General Hospital - Struga                                                                | Research Center for Genetic Engineering and Biotechnology<br>"Georgi D. Efremov", Macedonian Academy of Sciences and Arts | RCGEB - MASA et al            |
| EPI_ISL_677674 | General Hospital - Prilep                                                                | Research Center for Genetic Engineering and Biotechnology<br>"Georgi D. Efremov", Macedonian Academy of Sciences and Arts | RCGEB - MASA et al            |
| EPI_ISL_677720 | Clinical Hospital - Shtip                                                                | Research Center for Genetic Engineering and Biotechnology<br>"Georgi D. Efremov", Macedonian Academy of Sciences and Arts | RCGEB - MASA et al            |
| EPI_ISL_677721 | Clinical Hospital - Shtip                                                                | Research Center for Genetic Engineering and Biotechnology<br>"Georgi D. Efremov", Macedonian Academy of Sciences and Arts | RCGEB - MASA et al            |
| EPI_ISL_677722 | General Hospital - Ohrid                                                                 | Research Center for Genetic Engineering and Biotechnology<br>"Georgi D. Efremov", Macedonian Academy of Sciences and Arts | RCGEB - MASA et al            |
| EPI_ISL_677723 | Institute for Lung Diseases in Children - Skopje                                         | Research Center for Genetic Engineering and Biotechnology<br>"Georgi D. Efremov", Macedonian Academy of Sciences and Arts | RCGEB - MASA et al            |
| EPI_ISL_677724 | Clinical Hospital - Shtip                                                                | Research Center for Genetic Engineering and Biotechnology<br>"Georgi D. Efremov", Macedonian Academy of Sciences and Arts | RCGEB - MASA et al            |
| EPI_ISL_677725 | General Hospital - Ohrid                                                                 | Research Center for Genetic Engineering and Biotechnology<br>"Georgi D. Efremov", Macedonian Academy of Sciences and Arts | RCGEB - MASA et al            |
| EPI_ISL_677726 | General Hospital - Ohrid                                                                 | Research Center for Genetic Engineering and Biotechnology<br>"Georgi D. Efremov", Macedonian Academy of Sciences and Arts | RCGEB - MASA et al            |
| EPI_ISL_678248 | Center for public health - Skopje                                                        | Research Center for Genetic Engineering and Biotechnology<br>"Georgi D. Efremov", Macedonian Academy of Sciences and Arts | RCGEB - MASA et al            |
| EPI_ISL_678249 | Center for public health - Skopje                                                        | Research Center for Genetic Engineering and Biotechnology<br>"Georgi D. Efremov", Macedonian Academy of Sciences and Arts | RCGEB - MASA et al            |
| EPI_ISL_678250 | Clinical Hospital - Shtip                                                                | Research Center for Genetic Engineering and Biotechnology<br>"Georgi D. Efremov", Macedonian Academy of Sciences and Arts | RCGEB - MASA et al            |
| EPI_ISL_492075 | Institute for Public Health of the Republic of North Macedonia                           | Charite Universitätsmedizin Berlin, Institute of Virology                                                                 | Victor M Corman et al         |
| EPI_ISL_492083 | Institute for Public Health of the Republic of North Macedonia                           | Charite Universitätsmedizin Berlin, Institute of Virology                                                                 | Victor M Corman et al         |
| EPI_ISL_933568 | Macedonian Academy of Sciences and Arts                                                  | Research Center for Genetic Engineering and Biotechnology<br>"Georgi D. Efremov", Macedonian Academy of Sciences and Arts | RCGEB - MASA et al            |
| EPI_ISL_735392 | Laboratory of Genetics and Personalized Medicine, Zan Mitrev Clinic                      | Laboratory of Genetics and Personalized Medicine, Zan Mitrev Clinic                                                       | Kungulovski et al. et al      |
| EPI_ISL_906829 | Akershus University Hospital, Department for Microbiology and Infectious Disease Control | Norwegian Institute of Public Health, Department of Virology                                                              | Kathrine Stene-Johansen et al |
| EPI_ISL_860285 | Department of Medical Microbiology, St. Olavs hospital                                   | Norwegian Institute of Public Health, Department of Virology                                                              | Kathrine Stene-Johansen et al |
| EPI_ISL_860287 | Department of Medical Microbiology, St. Olavs hospital                                   | Norwegian Institute of Public Health, Department of Virology                                                              | Kathrine Stene-Johansen et al |
| EPI_ISL_964265 | Norwegian Institute of Public Health, Department of Virology                             | Norwegian Institute of Public Health, Department of Virology                                                              | Kathrine Stene-Johansen et al |
| EPI_ISL_964267 | Norwegian Institute of Public Health, Department of Virology                             | Norwegian Institute of Public Health, Department of Virology                                                              | Kathrine Stene-Johansen et al |

|                |                                                                                                                     |                                                              |                               |
|----------------|---------------------------------------------------------------------------------------------------------------------|--------------------------------------------------------------|-------------------------------|
| EPI_ISL_964292 | Oslo University Hospital, Department of Medical Microbiology                                                        | Norwegian Institute of Public Health, Department of Virology | Kathrine Stene-Johansen et al |
| EPI_ISL_417483 | Oslo University Hospital, Department of Medical Microbiology                                                        | Norwegian Institute of Public Health                         | Kathrine Stene-Johansen et al |
| EPI_ISL_417484 | Oslo University Hospital, Department of Medical Microbiology                                                        | Norwegian Institute of Public Health, Department of Virology | Kathrine Stene-Johansen et al |
| EPI_ISL_965002 | Furst Medical Laboratory                                                                                            | Norwegian Institute of Public Health, Department of Virology | Kathrine Stene-Johansen et al |
| EPI_ISL_965003 | Furst Medical Laboratory                                                                                            | Norwegian Institute of Public Health, Department of Virology | Kathrine Stene-Johansen et al |
| EPI_ISL_417490 | Oslo University Hospital, Department of Medical Microbiology                                                        | Norwegian Institute of Public Health, Department of Virology | Kathrine Stene-Johansen et al |
| EPI_ISL_420135 | Oslo University Hospital, Department of Medical Microbiology                                                        | Norwegian Institute of Public Health, Department of Virology | Kathrine Stene-Johansen et al |
| EPI_ISL_965010 | Nordland Hospital - Bodo, Laboratory Department, Molecular Biology Unit                                             | Norwegian Institute of Public Health, Department of Virology | Kathrine Stene-Johansen et al |
| EPI_ISL_417488 | Oslo University Hospital, Department of Medical Microbiology                                                        | Norwegian Institute of Public Health, Department of Virology | Kathrine Stene-Johansen et al |
| EPI_ISL_417489 | Oslo University Hospital, Department of Medical Microbiology                                                        | Norwegian Institute of Public Health, Department of Virology | Kathrine Stene-Johansen et al |
| EPI_ISL_420134 | Akershus University Hospital, Department for Microbiology and Infectious Disease Control                            | Norwegian Institute of Public Health, Department of Virology | Kathrine Stene-Johansen et al |
| EPI_ISL_420143 | Unilabs Laboratory Medicine                                                                                         | Norwegian Institute of Public Health, Department of Virology | Kathrine Stene-Johansen et al |
| EPI_ISL_420147 | Hospital of Southern Norway - Kristiansand, Department of Medical Microbiology                                      | Norwegian Institute of Public Health, Department of Virology | Kathrine Stene-Johansen et al |
| EPI_ISL_420148 | Ostfold Hospital Trust -Kalnes Centre for Laboratory Medicine Section for gene technology and infection serology    | Norwegian Institute of Public Health, Department of Virology | Kathrine Stene-Johansen et al |
| EPI_ISL_420151 | Nordland Hospital - Bodo, Laboratory Department, Molecular Biology Unit                                             | Norwegian Institute of Public Health, Department of Virology | Kathrine Stene-Johansen et al |
| EPI_ISL_420152 | University Hospital of Northern Norway, Department for Microbiology and Infectious Disease Control                  | Norwegian Institute of Public Health, Department of Virology | Kathrine Stene-Johansen et al |
| EPI_ISL_449786 | Ostfold Hospital Trust - Kalnes, Centre for Laboratory Medicine, Section for gene technology and infection serology | Norwegian Institute of Public Health, Department of Virology | Kathrine Stene-Johansen et al |
| EPI_ISL_449792 | Dept. of Medical Microbiology, Stavanger University Hospital, Helse Stavanger HF                                    | Norwegian Institute of Public Health, Department of Virology | Kathrine Stene-Johansen et al |
| EPI_ISL_449794 | Dept. of Medical Microbiology, Stavanger University Hospital, Helse Stavanger HF                                    | Norwegian Institute of Public Health, Department of Virology | Kathrine Stene-Johansen et al |
| EPI_ISL_481209 | Ostfold Hospital Trust - Kalnes, Centre for Laboratory Medicine, Section for gene technology and infection serology | Norwegian Institute of Public Health, Department of Virology | Kathrine Stene-Johansen et al |
| EPI_ISL_481210 | Ostfold Hospital Trust - Kalnes, Centre for Laboratory Medicine, Section for gene technology and infection serology | Norwegian Institute of Public Health, Department of Virology | Kathrine Stene-Johansen et al |
| EPI_ISL_493351 | Oslo University Hospital, Department of Medical Microbiology                                                        | Norwegian Institute of Public Health, Department of Virology | Kathrine Stene-Johansen et al |
| EPI_ISL_471176 | Hospital of Southern Norway - Kristiansand, Department of Medical Microbiology                                      | Norwegian Institute of Public Health, Department of Virology | Kathrine Stene-Johansen et al |
| EPI_ISL_471177 | Oslo University Hospital, Department of Medical Microbiology                                                        | Norwegian Institute of Public Health, Department of Virology | Kathrine Stene-Johansen et al |
| EPI_ISL_481207 | Ostfold Hospital Trust - Kalnes, Centre for Laboratory Medicine, Section for gene technology and infection serology | Norwegian Institute of Public Health, Department of Virology | Kathrine Stene-Johansen et al |
| EPI_ISL_481213 | Ostfold Hospital Trust - Kalnes, Centre for Laboratory Medicine, Section for gene technology and infection serology | Norwegian Institute of Public Health, Department of Virology | Kathrine Stene-Johansen et al |
| EPI_ISL_481215 | Oslo University Hospital, Department of Medical Microbiology                                                        | Norwegian Institute of Public Health, Department of Virology | Kathrine Stene-Johansen et al |
| EPI_ISL_493357 | Furst Medical Laboratory                                                                                            | Norwegian Institute of Public Health, Department of Virology | Kathrine Stene-Johansen et al |
| EPI_ISL_493358 | Furst Medical Laboratory                                                                                            | Norwegian Institute of Public Health, Department of Virology | Kathrine Stene-Johansen et al |
| EPI_ISL_493359 | Furst Medical Laboratory                                                                                            | Norwegian Institute of Public Health, Department of Virology | Kathrine Stene-Johansen et al |
| EPI_ISL_493360 | Furst Medical Laboratory                                                                                            | Norwegian Institute of Public Health, Department of Virology | Kathrine Stene-Johansen et al |
| EPI_ISL_493367 | Furst Medical Laboratory                                                                                            | Norwegian Institute of Public Health, Department of Virology | Kathrine Stene-Johansen et al |

|                |                                                                                                                     |                                                              |                               |
|----------------|---------------------------------------------------------------------------------------------------------------------|--------------------------------------------------------------|-------------------------------|
| EPI_ISL_493368 | Furst Medical Laboratory                                                                                            | Norwegian Institute of Public Health, Department of Virology | Kathrine Stene-Johansen et al |
| EPI_ISL_493369 | Furst Medical Laboratory                                                                                            | Norwegian Institute of Public Health, Department of Virology | Kathrine Stene-Johansen et al |
| EPI_ISL_493371 | Furst Medical Laboratory                                                                                            | Norwegian Institute of Public Health, Department of Virology | Kathrine Stene-Johansen et al |
| EPI_ISL_493373 | Furst Medical Laboratory                                                                                            | Norwegian Institute of Public Health, Department of Virology | Kathrine Stene-Johansen et al |
| EPI_ISL_493374 | Furst Medical Laboratory                                                                                            | Norwegian Institute of Public Health, Department of Virology | Kathrine Stene-Johansen et al |
| EPI_ISL_493375 | Furst Medical Laboratory                                                                                            | Norwegian Institute of Public Health, Department of Virology | Kathrine Stene-Johansen et al |
| EPI_ISL_493378 | Furst Medical Laboratory                                                                                            | Norwegian Institute of Public Health, Department of Virology | Kathrine Stene-Johansen et al |
| EPI_ISL_493383 | Medical Microbiology Unit, Department for Laboratory Medicine, Drammen Hospital, Vestre Viken Health Trust,         | Norwegian Institute of Public Health, Department of Virology | Kathrine Stene-Johansen et al |
| EPI_ISL_493387 | Oslo University Hospital, Department of Medical Microbiology                                                        | Norwegian Institute of Public Health, Department of Virology | Kathrine Stene-Johansen et al |
| EPI_ISL_500768 | Furst Medical Laboratory                                                                                            | Norwegian Institute of Public Health, Department of Virology | Kathrine Stene-Johansen et al |
| EPI_ISL_500770 | Furst Medical Laboratory                                                                                            | Norwegian Institute of Public Health, Department of Virology | Kathrine Stene-Johansen et al |
| EPI_ISL_500774 | Furst Medical Laboratory                                                                                            | Norwegian Institute of Public Health, Department of Virology | Kathrine Stene-Johansen et al |
| EPI_ISL_500782 | Akershus University Hospital, Department for Microbiology and Infectious Disease Control                            | Norwegian Institute of Public Health, Department of Virology | Kathrine Stene-Johansen et al |
| EPI_ISL_500785 | Furst Medical Laboratory                                                                                            | Norwegian Institute of Public Health, Department of Virology | Kathrine Stene-Johansen et al |
| EPI_ISL_500786 | Furst Medical Laboratory                                                                                            | Norwegian Institute of Public Health, Department of Virology | Kathrine Stene-Johansen et al |
| EPI_ISL_549171 | Akershus University Hospital, Department for Microbiology and Infectious Disease Control                            | Norwegian Institute of Public Health, Department of Virology | Kathrine Stene-Johansen et al |
| EPI_ISL_549059 | Medical Microbiology Unit, Department for Laboratory Medicine, Drammen Hospital, Vestre Viken Health Trust,         | Norwegian Institute of Public Health, Department of Virology | Kathrine Stene-Johansen et al |
| EPI_ISL_549101 | Ostfold Hospital Trust - Kalnes, Centre for Laboratory Medicine, Section for gene technology and infection serology | Norwegian Institute of Public Health, Department of Virology | Kathrine Stene-Johansen et al |
| EPI_ISL_549067 | Furst Medical Laboratory                                                                                            | Norwegian Institute of Public Health, Department of Virology | Kathrine Stene-Johansen et al |
| EPI_ISL_549119 | Furst Medical Laboratory                                                                                            | Norwegian Institute of Public Health, Department of Virology | Kathrine Stene-Johansen et al |
| EPI_ISL_549076 | Furst Medical Laboratory                                                                                            | Norwegian Institute of Public Health, Department of Virology | Kathrine Stene-Johansen et al |
| EPI_ISL_549084 | Akershus University Hospital, Department for Microbiology and Infectious Disease Control                            | Norwegian Institute of Public Health, Department of Virology | Kathrine Stene-Johansen et al |
| EPI_ISL_549125 | Unilabs Laboratory Medicine                                                                                         | Norwegian Institute of Public Health, Department of Virology | Kathrine Stene-Johansen et al |
| EPI_ISL_549031 | Oslo University Hospital, Department of Medical Microbiology                                                        | Norwegian Institute of Public Health, Department of Virology | Kathrine Stene-Johansen et al |
| EPI_ISL_549034 | Oslo University Hospital, Department of Medical Microbiology                                                        | Norwegian Institute of Public Health, Department of Virology | Kathrine Stene-Johansen et al |
| EPI_ISL_549040 | Medical Microbiology Unit, Department for Laboratory Medicine, Drammen Hospital, Vestre Viken Health Trust,         | Norwegian Institute of Public Health, Department of Virology | Kathrine Stene-Johansen et al |
| EPI_ISL_590883 | Foerde Hospital, Department of Microbiology                                                                         | Norwegian Institute of Public Health, Department of Virology | Kathrine Stene-Johansen et al |
| EPI_ISL_590936 | Hospital of Southern Norway - Kristiansand, Department of Medical Microbiology                                      | Norwegian Institute of Public Health, Department of Virology | Kathrine Stene-Johansen et al |
| EPI_ISL_635113 | University Hospital of Northern Norway, Department for Microbiology and Infectious Disease Control                  | Norwegian Institute of Public Health, Department of Virology | Kathrine Stene-Johansen et al |
| EPI_ISL_590941 | University Hospital of Northern Norway, Department for Microbiology and Infectious Disease Control                  | Norwegian Institute of Public Health, Department of Virology | Kathrine Stene-Johansen et al |
| EPI_ISL_635116 | Ostfold Hospital Trust - Kalnes, Centre for Laboratory Medicine, Section for gene technology and infection serology | Norwegian Institute of Public Health, Department of Virology | Kathrine Stene-Johansen et al |
| EPI_ISL_668438 | Ostfold Hospital Trust - Kalnes, Centre for Laboratory Medicine, Section for gene technology and infection serology | Norwegian Institute of Public Health, Department of Virology | Kathrine Stene-Johansen et al |

|                |                                                                                                    |                                                              |                               |
|----------------|----------------------------------------------------------------------------------------------------|--------------------------------------------------------------|-------------------------------|
| EPI_ISL_590976 | Dept. of Medical Microbiology, Stavanger University Hospital, Helse Stavanger HF                   | Norwegian Institute of Public Health, Department of Virology | Kathrine Stene-Johansen et al |
| EPI_ISL_591018 | Department of Medical Microbiology - section Molde, Molde Hospital                                 | Norwegian Institute of Public Health, Department of Virology | Kathrine Stene-Johansen et al |
| EPI_ISL_591019 | Department of Medical Microbiology - section Molde, Molde Hospital                                 | Norwegian Institute of Public Health, Department of Virology | Kathrine Stene-Johansen et al |
| EPI_ISL_590959 | Dept. of Medical Microbiology, Stavanger University Hospital, Helse Stavanger HF                   | Norwegian Institute of Public Health, Department of Virology | Kathrine Stene-Johansen et al |
| EPI_ISL_590960 | Dept. of Medical Microbiology, Stavanger University Hospital, Helse Stavanger HF                   | Norwegian Institute of Public Health, Department of Virology | Kathrine Stene-Johansen et al |
| EPI_ISL_590964 | Dept. of Medical Microbiology, Stavanger University Hospital, Helse Stavanger HF                   | Norwegian Institute of Public Health, Department of Virology | Kathrine Stene-Johansen et al |
| EPI_ISL_590969 | Dept. of Medical Microbiology, Stavanger University Hospital, Helse Stavanger HF                   | Norwegian Institute of Public Health, Department of Virology | Kathrine Stene-Johansen et al |
| EPI_ISL_590971 | Dept. of Medical Microbiology, Stavanger University Hospital, Helse Stavanger HF                   | Norwegian Institute of Public Health, Department of Virology | Kathrine Stene-Johansen et al |
| EPI_ISL_590975 | Dept. of Medical Microbiology, Stavanger University Hospital, Helse Stavanger HF                   | Norwegian Institute of Public Health, Department of Virology | Kathrine Stene-Johansen et al |
| EPI_ISL_775467 | Department of Medical Microbiology - section Molde, Molde Hospital                                 | Norwegian Institute of Public Health, Department of Virology | Kathrine Stene-Johansen et al |
| EPI_ISL_635131 | Innlandet Hospital Trust, Division Lillehammer, Department for Medical Microbiology                | Norwegian Institute of Public Health, Department of Virology | Kathrine Stene-Johansen et al |
| EPI_ISL_775440 | Innlandet Hospital Trust, Division Lillehammer, Department for Medical Microbiology                | Norwegian Institute of Public Health, Department of Virology | Kathrine Stene-Johansen et al |
| EPI_ISL_635184 | Haukeland University Hospital, Department of Medical Microbiology                                  | Norwegian Institute of Public Health, Department of Virology | Kathrine Stene-Johansen et al |
| EPI_ISL_775478 | Unilabs Laboratory Medicine                                                                        | Norwegian Institute of Public Health, Department of Virology | Kathrine Stene-Johansen et al |
| EPI_ISL_775479 | Akershus University Hospital, Department for Microbiology and Infectious Disease Control           | Norwegian Institute of Public Health, Department of Virology | Kathrine Stene-Johansen et al |
| EPI_ISL_635071 | University Hospital of Northern Norway, Department for Microbiology and Infectious Disease Control | Norwegian Institute of Public Health, Department of Virology | Kathrine Stene-Johansen et al |
| EPI_ISL_668402 | Oslo University Hospital, Department of Medical Microbiology                                       | Norwegian Institute of Public Health, Department of Virology | Kathrine Stene-Johansen et al |
| EPI_ISL_668424 | University Hospital of Northern Norway, Department for Microbiology and Infectious Disease Control | Norwegian Institute of Public Health, Department of Virology | Kathrine Stene-Johansen et al |
| EPI_ISL_668425 | University Hospital of Northern Norway, Department for Microbiology and Infectious Disease Control | Norwegian Institute of Public Health, Department of Virology | Kathrine Stene-Johansen et al |
| EPI_ISL_775460 | Norwegian Institute of Public Health, Department of Virology                                       | Norwegian Institute of Public Health, Department of Virology | Kathrine Stene-Johansen et al |
| EPI_ISL_708070 | University Hospital of Northern Norway, Department for Microbiology and Infectious Disease Control | Norwegian Institute of Public Health, Department of Virology | Kathrine Stene-Johansen et al |
| EPI_ISL_775452 | University Hospital of Northern Norway, Department for Microbiology and Infectious Disease Control | Norwegian Institute of Public Health, Department of Virology | Kathrine Stene-Johansen et al |
| EPI_ISL_775453 | University Hospital of Northern Norway, Department for Microbiology and Infectious Disease Control | Norwegian Institute of Public Health, Department of Virology | Kathrine Stene-Johansen et al |
| EPI_ISL_708142 | Department of Medical Microbiology, St. Olavs hospital                                             | Norwegian Institute of Public Health, Department of Virology | Kathrine Stene-Johansen et al |
| EPI_ISL_708146 | Department of Medical Microbiology, St. Olavs hospital                                             | Norwegian Institute of Public Health, Department of Virology | Kathrine Stene-Johansen et al |
| EPI_ISL_775483 | Vestfold Hospital, Toensberg Department of Microbiology                                            | Norwegian Institute of Public Health, Department of Virology | Kathrine Stene-Johansen et al |
| EPI_ISL_775374 | Nordland Hospital - Bodo, Laboratory Department, Molecular Biology Unit                            | Norwegian Institute of Public Health, Department of Virology | Kathrine Stene-Johansen et al |
| EPI_ISL_775528 | Akershus University Hospital, Department for Microbiology and Infectious Disease Control           | Norwegian Institute of Public Health, Department of Virology | Kathrine Stene-Johansen et al |
| EPI_ISL_775529 | Akershus University Hospital, Department for Microbiology and Infectious Disease Control           | Norwegian Institute of Public Health, Department of Virology | Kathrine Stene-Johansen et al |

|                |                                                                                                                     |                                                                              |                               |
|----------------|---------------------------------------------------------------------------------------------------------------------|------------------------------------------------------------------------------|-------------------------------|
| EPI_ISL_77530  | Akershus University Hospital, Department for Microbiology and Infectious Disease Control                            | Norwegian Institute of Public Health, Department of Virology                 | Kathrine Stene-Johansen et al |
| EPI_ISL_775420 | Oslo University Hospital, Department of Medical Microbiology                                                        | Norwegian Institute of Public Health, Department of Virology                 | Kathrine Stene-Johansen et al |
| EPI_ISL_738313 | Foerde Hospital, Department of Microbiology                                                                         | Norwegian Institute of Public Health, Department of Virology                 | Kathrine Stene-Johansen et al |
| EPI_ISL_860206 | Ostfold Hospital Trust - Kalnes, Centre for Laboratory Medicine, Section for gene technology and infection serology | Norwegian Institute of Public Health, Department of Virology                 | Kathrine Stene-Johansen et al |
| EPI_ISL_860207 | Ostfold Hospital Trust - Kalnes, Centre for Laboratory Medicine, Section for gene technology and infection serology | Norwegian Institute of Public Health, Department of Virology                 | Kathrine Stene-Johansen et al |
| EPI_ISL_860218 | Ostfold Hospital Trust - Kalnes, Centre for Laboratory Medicine, Section for gene technology and infection serology | Norwegian Institute of Public Health, Department of Virology                 | Kathrine Stene-Johansen et al |
| EPI_ISL_664103 | Dept. of Microbiology and Infection Control, Akershus University Hospital HF                                        | Dept. of Microbiology and Infection Control, Akershus University Hospital HF | Hege Vangstein Aamot et al    |
| EPI_ISL_664106 | Dept. of Microbiology and Infection Control, Akershus University Hospital HF                                        | Dept. of Microbiology and Infection Control, Akershus University Hospital HF | Hege Vangstein Aamot et al    |
| EPI_ISL_665256 | Dept. of Microbiology and Infection Control, Akershus University Hospital HF                                        | Dept. of Microbiology and Infection Control, Akershus University Hospital HF | Hege Vangstein Aamot et al    |
| EPI_ISL_665258 | Dept. of Microbiology and Infection Control, Akershus University Hospital HF                                        | Dept. of Microbiology and Infection Control, Akershus University Hospital HF | Hege Vangstein Aamot et al    |
| EPI_ISL_665259 | Dept. of Microbiology and Infection Control, Akershus University Hospital HF                                        | Dept. of Microbiology and Infection Control, Akershus University Hospital HF | Hege Vangstein Aamot et al    |
| EPI_ISL_666603 | Dept. of Microbiology and Infection Control, Akershus University Hospital HF                                        | Dept. of Microbiology and Infection Control, Akershus University Hospital HF | Hege Vangstein Aamot et al    |
| EPI_ISL_666604 | Dept. of Microbiology and Infection Control, Akershus University Hospital HF                                        | Dept. of Microbiology and Infection Control, Akershus University Hospital HF | Hege Vangstein Aamot et al    |
| EPI_ISL_666606 | Dept. of Microbiology and Infection Control, Akershus University Hospital HF                                        | Dept. of Microbiology and Infection Control, Akershus University Hospital HF | Hege Vangstein Aamot et al    |
| EPI_ISL_666607 | Dept. of Microbiology and Infection Control, Akershus University Hospital HF                                        | Dept. of Microbiology and Infection Control, Akershus University Hospital HF | Hege Vangstein Aamot et al    |
| EPI_ISL_666608 | Dept. of Microbiology and Infection Control, Akershus University Hospital HF                                        | Dept. of Microbiology and Infection Control, Akershus University Hospital HF | Hege Vangstein Aamot et al    |
| EPI_ISL_666610 | Dept. of Microbiology and Infection Control, Akershus University Hospital HF                                        | Dept. of Microbiology and Infection Control, Akershus University Hospital HF | Hege Vangstein Aamot et al    |
| EPI_ISL_450351 | St.Olavs hospital/NTNU                                                                                              | Institute of Genomics Core Facility, University of Tartu                     | Aleksandr Ianevski et al      |
| EPI_ISL_491161 | Oman-National Influenza Center                                                                                      | Biotechnology & OMICs Laboratory                                             | Sajjad Asaf et al             |
| EPI_ISL_766569 | Oman-National Influenza Center                                                                                      | Oman-National Influenza Center                                               | Samiha Al-Kharusi et al       |
| EPI_ISL_457703 | Oman-NIC                                                                                                            | Department of Microbiology and Immunology- SQUH                              | Fahad Zadjali et al           |
| EPI_ISL_458119 | Oman National Influenza Centre                                                                                      | Department of Microbiology and Immunology-SQUH                               | Fahad Zadjali et al           |
| EPI_ISL_458121 | Oman National Influenza Centre                                                                                      | Department of Microbiology and Immunology-SQUH                               | Fahad Zadjali et al           |
| EPI_ISL_458116 | Oman National Influenza Centre                                                                                      | Department of Microbiology and Immunology-SQUH                               | Fahad Zadjali et al           |
| EPI_ISL_457705 | OMAN-NIC                                                                                                            | Department of Microbiology and Immunology- SQUH                              | Fahad Zadjali et al           |
| EPI_ISL_491969 | Oman-NIC                                                                                                            | Department of Microbiology and Immunology-SQUH                               | Fahad Zadjali et al           |
| EPI_ISL_491979 | Oman-NIC                                                                                                            | Department of Microbiology and Immunology-SQUH                               | Fahad Zadjali et al           |
| EPI_ISL_491985 | Oman-NIC                                                                                                            | Department of Microbiology and Immunology-SQUH                               | Fahad Zadjali et al           |
| EPI_ISL_491986 | Oman-NIC                                                                                                            | Department of Microbiology and Immunology-SQUH                               | Fahad Zadjali et al           |
| EPI_ISL_492014 | Oman-NIC                                                                                                            | Department of Microbiology and Immunology-SQUH                               | Fahad Zadjali et al           |
| EPI_ISL_492017 | Oman-NIC                                                                                                            | Department of Microbiology and Immunology-SQUH                               | Fahad Zadjali et al           |

|                |                                |                                                                                                                                                      |                         |
|----------------|--------------------------------|------------------------------------------------------------------------------------------------------------------------------------------------------|-------------------------|
| EPI_ISL_492019 | Oman-NIC                       | Department of Microbiology and Immunology-SQUH                                                                                                       | Fahad Zadjali et al     |
| EPI_ISL_492021 | Oman-NIC                       | Department of Microbiology and Immunology-SQUH                                                                                                       | Fahad Zadjali et al     |
| EPI_ISL_492022 | Oman-NIC                       | Department of Microbiology and Immunology-SQUH                                                                                                       | Fahad Zadjali et al     |
| EPI_ISL_492023 | Oman-NIC                       | Department of Microbiology and Immunology-SQUH                                                                                                       | Fahad Zadjali et al     |
| EPI_ISL_492024 | Oman-NIC                       | Department of Microbiology and Immunology-SQUH                                                                                                       | Fahad Zadjali et al     |
| EPI_ISL_492025 | Oman-NIC                       | Department of Microbiology and Immunology-SQUH                                                                                                       | Fahad Zadjali et al     |
| EPI_ISL_492026 | Oman-NIC                       | Department of Microbiology and Immunology-SQUH                                                                                                       | Fahad Zadjali et al     |
| EPI_ISL_492065 | Oman-National Influenza Center | Department of Microbiology and Immunology-SQUH Department of Microbiology and Immunology, Sultan Qaboos University Hopsital, P.O 35, Postal code 123 | Samira Al-Maruqi et al  |
| EPI_ISL_491128 | Oman-National Influenza Center | Biotechnology & OMICs Laboratory                                                                                                                     | Samira Al-Mahruqi et al |
| EPI_ISL_491130 | Oman-National Influenza Center | Biotechnology & OMICs Laboratory                                                                                                                     | Samira Al-Mahruqi et al |
| EPI_ISL_491131 | Oman-National Influenza Center | Biotechnology & OMICs Laboratory                                                                                                                     | Samira Al-Mahruqi et al |
| EPI_ISL_491166 | Oman-National Influenza Center | Biotechnology & OMICs Laboratory                                                                                                                     | Sajjad Asaf et al       |
| EPI_ISL_491133 | Oman-National Influenza Center | Biotechnology & OMICs Laboratory                                                                                                                     | Samiha Al-Kharusi et al |
| EPI_ISL_457938 | Oman-NIC                       | Oman-NIC                                                                                                                                             | Samira Al-Maruqi et al  |
| EPI_ISL_457939 | Oman-NIC                       | Oman-NIC                                                                                                                                             | Samira Al-Maruqi et al  |
| EPI_ISL_457974 | Oman-NIC                       | Oman-NIC                                                                                                                                             | Samira Al-Maruqi et al  |
| EPI_ISL_457975 | Oman-NIC                       | Oman-NIC                                                                                                                                             | Samira Al-Maruqi et al  |
| EPI_ISL_457976 | Oman-NIC                       | Oman-NIC                                                                                                                                             | Samira Al-Maruqi et al  |
| EPI_ISL_457977 | Oman-NIC                       | Oman-NIC                                                                                                                                             | Samira Al-Maruqi et al  |
| EPI_ISL_457978 | Oman-NIC                       | Oman-NIC                                                                                                                                             | Samira Al-Maruqi et al  |
| EPI_ISL_457979 | Oman-NIC                       | Oman-NIC                                                                                                                                             | Samira Al-Maruqi et al  |
| EPI_ISL_457985 | Oman-NIC                       | Oman-NIC                                                                                                                                             | Samira Al-Maruqi et al  |
| EPI_ISL_457986 | Oman-NIC                       | Oman-NIC                                                                                                                                             | Samira Al-Maruqi et al  |
| EPI_ISL_457987 | Oman-NIC                       | Oman-NIC                                                                                                                                             | Samira Al-Maruqi et al  |
| EPI_ISL_457988 | Oman-NIC                       | Oman-NIC                                                                                                                                             | Samira Al-Maruqi et al  |
| EPI_ISL_518822 | Oman-National Influenza Center | Biotechnology & OMICs Laboratory, Natural & Medical Sciences Research Center, University of Nizwa                                                    | Samira Al-Mahruqi et al |
| EPI_ISL_457990 | Oman-NIC                       | Oman-NIC                                                                                                                                             | Samira Al-Maruqi et al  |
| EPI_ISL_457991 | Oman-NIC                       | Oman-NIC                                                                                                                                             | Samira Al-Maruqi et al  |
| EPI_ISL_457992 | Oman-NIC                       | Oman-NIC                                                                                                                                             | Samira Al-Maruqi et al  |
| EPI_ISL_518823 | Oman-National Influenza Center | Biotechnology & OMICs Laboratory, Natural & Medical Sciences Research Center, University of Nizwa                                                    | Samira Al-Mahruqi et al |
| EPI_ISL_457993 | Oman-NIC                       | Oman-NIC                                                                                                                                             | Samira Al-Maruqi et al  |
| EPI_ISL_491116 | Oman-National Influenza Center | Biotechnology & OMICs Laboratory                                                                                                                     | Samira Al-Mahruqi et al |
| EPI_ISL_457995 | Oman-NIC                       | Oman-NIC                                                                                                                                             | Samira Al-Maruqi et al  |
| EPI_ISL_457997 | Oman-NIC                       | Oman-NIC                                                                                                                                             | Samira Al-Maruqi et al  |
| EPI_ISL_457701 | Oman-NIC                       | Oman-NIC                                                                                                                                             | Samira Al-Maruqi et al  |
| EPI_ISL_457704 | Oman-NIC                       | Oman-NIC                                                                                                                                             | Samira Al-Maruqi et al  |
| EPI_ISL_525426 | Oman-National Influenza Center | Biotechnology & OMICs Laboratory                                                                                                                     | Sajjad Asaf et al       |



|                |                                                                                                                                                                                            |                                                                                                                                                                                            |                        |
|----------------|--------------------------------------------------------------------------------------------------------------------------------------------------------------------------------------------|--------------------------------------------------------------------------------------------------------------------------------------------------------------------------------------------|------------------------|
| EPI_ISL_779285 | Jamil-ur-Rahman Center for Genome Research, Dr. Panjwani Center for Molecular Medicine and Drug Research                                                                                   | Jamil-ur-Rahman Center for Genome Research, Dr. Panjwani Center for Molecular Medicine and Drug Research                                                                                   | Shakeel et al          |
| EPI_ISL_779281 | Jamil-ur-Rahman Center for Genome Research, Dr. Panjwani Center for Molecular Medicine and Drug Research                                                                                   | Jamil-ur-Rahman Center for Genome Research, Dr. Panjwani Center for Molecular Medicine and Drug Research                                                                                   | Shakeel et al          |
| EPI_ISL_451958 | Jamil-ur-Rahman Center for Genome Research, Dr. Panjwani Center for Molecular Medicine and Drug Research, International Center for Chemical and Biological Sciences, University of Karachi | Jamil-ur-Rahman Center for Genome Research, Dr. Panjwani Center for Molecular Medicine and Drug Research, International Center for Chemical and Biological Sciences, University of Karachi | Shakeel et al          |
| EPI_ISL_632908 | Genomic Sciences, Rehman Medical Institute                                                                                                                                                 | Genomic Sciences, Rehman Medical Institute                                                                                                                                                 | Ali et al              |
| EPI_ISL_757285 | Department of Virology, Public Health Laboratories Division                                                                                                                                | Department of Virology, Public Health Laboratories Division                                                                                                                                | Massab Umair et al     |
| EPI_ISL_757286 | Department of Virology, Public Health Laboratories Division                                                                                                                                | Department of Virology, Public Health Laboratories Division                                                                                                                                | Massab Umair et al     |
| EPI_ISL_708839 | National Institute of Blood Diseases (NIBD), Molecular Biology Lab                                                                                                                         | Genomics Lab NIBD                                                                                                                                                                          | Samina Naz Mukry et al |
| EPI_ISL_709542 | National Institute of Blood Diseases (NIBD), Molecular Biology Lab                                                                                                                         | Genomics Lab NIBD                                                                                                                                                                          | Samina Naz Mukry et al |
| EPI_ISL_548942 | Institute of Microbiology, University of Veterinary and Animal sciences                                                                                                                    | Institute of Microbiology, University of Veterinary and Animal sciences                                                                                                                    | Yaqub et al            |
| EPI_ISL_548943 | Institute of Microbiology, University of Veterinary and Animal sciences                                                                                                                    | Institute of Microbiology, University of Veterinary and Animal sciences                                                                                                                    | Yaqub et al            |
| EPI_ISL_548944 | Institute of Microbiology, University of Veterinary and Animal sciences                                                                                                                    | Institute of Microbiology, University of Veterinary and Animal sciences                                                                                                                    | Yaqub et al            |
| EPI_ISL_548945 | Institute of Microbiology, University of Veterinary and Animal sciences                                                                                                                    | Institute of Microbiology, University of Veterinary and Animal sciences                                                                                                                    | Yaqub et al            |
| EPI_ISL_596507 | Palestinian Ministry of Health                                                                                                                                                             | Molecular Genetics Lab                                                                                                                                                                     | Nouar Qutob et al      |
| EPI_ISL_596501 | Palestinian Ministry of Health                                                                                                                                                             | Molecular Genetics Lab                                                                                                                                                                     | Nouar Qutob et al      |
| EPI_ISL_596502 | Palestinian Ministry of Health                                                                                                                                                             | Molecular Genetics Lab                                                                                                                                                                     | Nouar Qutob et al      |
| EPI_ISL_596503 | Palestinian Ministry of Health                                                                                                                                                             | Molecular Genetics Lab                                                                                                                                                                     | Nouar Qutob et al      |
| EPI_ISL_596504 | Palestinian Ministry of Health                                                                                                                                                             | Molecular Genetics Lab                                                                                                                                                                     | Nouar Qutob et al      |
| EPI_ISL_596505 | Palestinian Ministry of Health                                                                                                                                                             | Molecular Genetics Lab                                                                                                                                                                     | Nouar Qutob et al      |
| EPI_ISL_596506 | Palestinian Ministry of Health                                                                                                                                                             | Molecular Genetics Lab                                                                                                                                                                     | Nouar Qutob et al      |
| EPI_ISL_596514 | Palestinian Ministry of Health                                                                                                                                                             | Molecular Genetics Lab                                                                                                                                                                     | Nouar Qutob et al      |
| EPI_ISL_596508 | Palestinian Ministry of Health                                                                                                                                                             | Molecular Genetics Lab                                                                                                                                                                     | Nouar Qutob et al      |
| EPI_ISL_596509 | Palestinian Ministry of Health                                                                                                                                                             | Molecular Genetics Lab                                                                                                                                                                     | Nouar Qutob et al      |
| EPI_ISL_596510 | Palestinian Ministry of Health                                                                                                                                                             | Molecular Genetics Lab                                                                                                                                                                     | Nouar Qutob et al      |
| EPI_ISL_596511 | Palestinian Ministry of Health                                                                                                                                                             | Molecular Genetics Lab                                                                                                                                                                     | Nouar Qutob et al      |
| EPI_ISL_596512 | Palestinian Ministry of Health                                                                                                                                                             | Molecular Genetics Lab                                                                                                                                                                     | Nouar Qutob et al      |
| EPI_ISL_596522 | Palestinian Ministry of Health                                                                                                                                                             | Molecular Genetics Lab                                                                                                                                                                     | Nouar Qutob et al      |
| EPI_ISL_596516 | Palestinian Ministry of Health                                                                                                                                                             | Molecular Genetics Lab                                                                                                                                                                     | Nouar Qutob et al      |
| EPI_ISL_596517 | Palestinian Ministry of Health                                                                                                                                                             | Molecular Genetics Lab                                                                                                                                                                     | Nouar Qutob et al      |
| EPI_ISL_596520 | Palestinian Ministry of Health                                                                                                                                                             | Molecular Genetics Lab                                                                                                                                                                     | Nouar Qutob et al      |
| EPI_ISL_596533 | Palestinian Ministry of Health                                                                                                                                                             | Molecular Genetics Lab                                                                                                                                                                     | Nouar Qutob et al      |
| EPI_ISL_596523 | Palestinian Ministry of Health                                                                                                                                                             | Molecular Genetics Lab                                                                                                                                                                     | Nouar Qutob et al      |
| EPI_ISL_596526 | Palestinian Ministry of Health                                                                                                                                                             | Molecular Genetics Lab                                                                                                                                                                     | Nouar Qutob et al      |
| EPI_ISL_596527 | Palestinian Ministry of Health                                                                                                                                                             | Molecular Genetics Lab                                                                                                                                                                     | Nouar Qutob et al      |
| EPI_ISL_596528 | Palestinian Ministry of Health                                                                                                                                                             | Molecular Genetics Lab                                                                                                                                                                     | Nouar Qutob et al      |
| EPI_ISL_596529 | Palestinian Ministry of Health                                                                                                                                                             | Molecular Genetics Lab                                                                                                                                                                     | Nouar Qutob et al      |



|                |                                                                     |                                                                     |                     |
|----------------|---------------------------------------------------------------------|---------------------------------------------------------------------|---------------------|
| EPI_ISL_596535 | Palestinian Ministry of Health                                      | Molecular Genetics Lab                                              | Nouar Qutob et al   |
| EPI_ISL_596537 | Palestinian Ministry of Health                                      | Molecular Genetics Lab                                              | Nouar Qutob et al   |
| EPI_ISL_596538 | Palestinian Ministry of Health                                      | Molecular Genetics Lab                                              | Nouar Qutob et al   |
| EPI_ISL_596543 | Palestinian Ministry of Health                                      | Molecular Genetics Lab                                              | Nouar Qutob et al   |
| EPI_ISL_596544 | Palestinian Ministry of Health                                      | Molecular Genetics Lab                                              | Nouar Qutob et al   |
| EPI_ISL_596545 | Palestinian Ministry of Health                                      | Molecular Genetics Lab                                              | Nouar Qutob et al   |
| EPI_ISL_596555 | Palestinian Ministry of Health                                      | Molecular Genetics Lab                                              | Nouar Qutob et al   |
| EPI_ISL_596549 | Palestinian Ministry of Health                                      | Molecular Genetics Lab                                              | Nouar Qutob et al   |
| EPI_ISL_596553 | Palestinian Ministry of Health                                      | Molecular Genetics Lab                                              | Nouar Qutob et al   |
| EPI_ISL_596556 | Palestinian Ministry of Health                                      | Molecular Genetics Lab                                              | Nouar Qutob et al   |
| EPI_ISL_596557 | Palestinian Ministry of Health                                      | Molecular Genetics Lab                                              | Nouar Qutob et al   |
| EPI_ISL_596559 | Palestinian Ministry of Health                                      | Molecular Genetics Lab                                              | Nouar Qutob et al   |
| EPI_ISL_596562 | Palestinian Ministry of Health                                      | Molecular Genetics Lab                                              | Nouar Qutob et al   |
| EPI_ISL_596563 | Palestinian Ministry of Health                                      | Molecular Genetics Lab                                              | Nouar Qutob et al   |
| EPI_ISL_596565 | Palestinian Ministry of Health                                      | Molecular Genetics Lab                                              | Nouar Qutob et al   |
| EPI_ISL_710483 | Department of Medical Laboratory Sciences, Arab American University | Department of Medical Laboratory Sciences, Arab American University | Al-Jawabreh et al   |
| EPI_ISL_710484 | Department of Medical Laboratory Sciences, Arab American University | Department of Medical Laboratory Sciences, Arab American University | Al-Jawabreh et al   |
| EPI_ISL_739659 | Al-Quds Nutrition and Health Research Institute, Al-Quds University | Al-Quds Nutrition and Health Research Institute, Al-Quds University | Nasereddin et al    |
| EPI_ISL_752605 | Faculty of Medicine, Al-Quds University                             | Faculty of Medicine, Al-Quds University                             | Ereqat et al        |
| EPI_ISL_739661 | Al-Quds Nutrition and Health Research Institute, Al-Quds University | Al-Quds Nutrition and Health Research Institute, Al-Quds University | Nasereddin et al    |
| EPI_ISL_739660 | Al-Quds Nutrition and Health Research Institute, Al-Quds University | Al-Quds Nutrition and Health Research Institute, Al-Quds University | Nasereddin et al    |
| EPI_ISL_873164 | Medical Laboratory Sciences, Arab American University               | Medical Laboratory Sciences, Arab American University               | Dumaidi et al       |
| EPI_ISL_873165 | Medical Laboratory Sciences, Arab American University               | Medical Laboratory Sciences, Arab American University               | Dumaidi et al       |
| EPI_ISL_649153 | Al-Quds Nutrition and Health Research Institute, Al-Quds University | Al-Quds Nutrition and Health Research Institute, Al-Quds University | Nasereddin et al    |
| EPI_ISL_661272 | Al-Quds Nutrition and Health Research Institute, Al-Quds University | Al-Quds Nutrition and Health Research Institute, Al-Quds University | Ereqat et al        |
| EPI_ISL_496604 | Gorgas Memorial Laboratory of Health Studies                        | Gorgas Memorial Laboratory of Health Studies                        | Danilo Franco et al |
| EPI_ISL_496605 | Gorgas Memorial Laboratory of Health Studies                        | Gorgas Memorial Laboratory of Health Studies                        | Danilo Franco et al |
| EPI_ISL_496606 | Gorgas Memorial Laboratory of Health Studies                        | Gorgas Memorial Laboratory of Health Studies                        | Danilo Franco et al |
| EPI_ISL_496607 | Gorgas Memorial Laboratory of Health Studies                        | Gorgas Memorial Laboratory of Health Studies                        | Danilo Franco et al |
| EPI_ISL_496609 | Gorgas Memorial Laboratory of Health Studies                        | Gorgas Memorial Laboratory of Health Studies                        | Danilo Franco et al |
| EPI_ISL_496611 | Gorgas Memorial Laboratory of Health Studies                        | Gorgas Memorial Laboratory of Health Studies                        | Danilo Franco et al |
| EPI_ISL_496612 | Gorgas Memorial Laboratory of Health Studies                        | Gorgas Memorial Laboratory of Health Studies                        | Danilo Franco et al |
| EPI_ISL_496615 | Gorgas Memorial Laboratory of Health Studies                        | Gorgas Memorial Laboratory of Health Studies                        | Danilo Franco et al |
| EPI_ISL_496617 | Gorgas Memorial Laboratory of Health Studies                        | Gorgas Memorial Laboratory of Health Studies                        | Danilo Franco et al |
| EPI_ISL_496627 | Gorgas Memorial Laboratory of Health Studies                        | Gorgas Memorial Laboratory of Health Studies                        | Danilo Franco et al |
| EPI_ISL_496632 | Gorgas Memorial Laboratory of Health Studies                        | Gorgas Memorial Laboratory of Health Studies                        | Danilo Franco et al |
| EPI_ISL_496634 | Gorgas Memorial Laboratory of Health Studies                        | Gorgas Memorial Laboratory of Health Studies                        | Danilo Franco et al |
| EPI_ISL_496636 | Gorgas Memorial Laboratory of Health Studies                        | Gorgas Memorial Laboratory of Health Studies                        | Danilo Franco et al |





|                |                                                                                                                               |                                                                                                                                               |                                  |
|----------------|-------------------------------------------------------------------------------------------------------------------------------|-----------------------------------------------------------------------------------------------------------------------------------------------|----------------------------------|
| EPI_ISL_536480 | Instituto Nacional de Salud                                                                                                   | Laboratorio de Infecciones Respiratorias Agudas                                                                                               | Eduardo Juscamayta Lopez et al   |
| EPI_ISL_536481 | Instituto Nacional de Salud                                                                                                   | Laboratorio de Infecciones Respiratorias Agudas                                                                                               | Eduardo Juscamayta Lopez et al   |
| EPI_ISL_536502 | Instituto Nacional de Salud                                                                                                   | Laboratorio de Infecciones Respiratorias Agudas                                                                                               | Eduardo Juscamayta Lopez et al   |
| EPI_ISL_536503 | Instituto Nacional de Salud                                                                                                   | Laboratorio de Infecciones Respiratorias Agudas                                                                                               | Eduardo Juscamayta Lopez et al   |
| EPI_ISL_536504 | Instituto Nacional de Salud                                                                                                   | Laboratorio de Infecciones Respiratorias Agudas                                                                                               | Eduardo Juscamayta Lopez et al   |
| EPI_ISL_540946 | Laboratorio de Referencia Nacional de Virus Respiratorios, Instituto Nacional de Salud Peru                                   | Laboratorio de Genómica Microbiana, Universidad Peruana Cayetano Heredia                                                                      | Pablo Tsukayama et al            |
| EPI_ISL_536505 | Instituto Nacional de Salud                                                                                                   | Laboratorio de Infecciones Respiratorias Agudas                                                                                               | Eduardo Juscamayta Lopez et al   |
| EPI_ISL_536506 | Instituto Nacional de Salud                                                                                                   | Laboratorio de Infecciones Respiratorias Agudas                                                                                               | Eduardo Juscamayta Lopez et al   |
| EPI_ISL_536507 | Instituto Nacional de Salud                                                                                                   | Laboratorio de Infecciones Respiratorias Agudas                                                                                               | Eduardo Juscamayta Lopez et al   |
| EPI_ISL_536559 | Instituto Nacional de Salud                                                                                                   | Laboratorio de Infecciones Respiratorias Agudas                                                                                               | Eduardo Juscamayta Lopez et al   |
| EPI_ISL_593774 | HOSPITAL REGIONAL LAMBAYEQUE                                                                                                  | GENOMA MAYOR                                                                                                                                  | Franklin R. Aguilar-Gamboa et al |
| EPI_ISL_593776 | HOSPITAL REGIONAL LAMBAYEQUE                                                                                                  | GENOMA MAYOR                                                                                                                                  | Franklin R. Aguilar-Gamboa et al |
| EPI_ISL_593772 | HOSPITAL REGIONAL LAMBAYEQUE                                                                                                  | GENOMA MAYOR                                                                                                                                  | Franklin R. Aguilar-Gamboa et al |
| EPI_ISL_514265 | Laboratorio de Referencia Nacional de Virus Respiratorio. Instituto Nacional de Salud. Perú                                   | Laboratorio de Referencia Nacional de Biotecnología y Biología Molecular. Instituto Nacional de Salud Perú                                    | Carlos Padilla Rojas et al       |
| EPI_ISL_523954 | Laboratorio de Referencia Nacional de Virus Respiratorio. Centro Nacional de Salud Publica. Instituto Nacional de Salud Peru. | Laboratorio de Referencia Nacional de Biotecnología y Biología Molecular. Centro Nacional de Salud Publica. Instituto Nacional de Salud Peru. | Carlos Padilla Rojas et al       |
| EPI_ISL_536524 | Instituto Nacional de Salud                                                                                                   | Laboratorio de Infecciones Respiratorias Agudas                                                                                               | Eduardo Juscamayta Lopez et al   |
| EPI_ISL_536562 | Instituto Nacional de Salud                                                                                                   | Laboratorio de Infecciones Respiratorias Agudas                                                                                               | Eduardo Juscamayta Lopez et al   |
| EPI_ISL_529067 | Laboratorio de Referencia Nacional de Virus Respiratorios, Instituto Nacional de Salud Peru                                   | Laboratorio de Genómica Microbiana, Universidad Peruana Cayetano Heredia                                                                      | Pablo Tsukayama et al            |
| EPI_ISL_545955 | Laboratorio de Infecciones Respiratorias Agudas. Centro Nacional de Salud Publica, Instituto Nacional de Salud                | Laboratorio de Infecciones Respiratorias Agudas. Centro Nacional de Salud Publica, Instituto Nacional de Salud                                | Juscamayta et al                 |
| EPI_ISL_490976 | Laboratorio de Referencia Nacional de Virus Respiratorio. Instituto Nacional de Salud Perú                                    | Laboratorio de Referencia Nacional de Biotecnología y Biología Molecular. Instituto Nacional de Salud Perú                                    | Carlos Padilla Rojas et al       |
| EPI_ISL_491428 | Laboratorio de Referencia Nacional de Virus Respiratorio. Instituto Nacional de Salud Perú                                    | Laboratorio de Referencia Nacional de Biotecnología y Biología Molecular. Instituto Nacional de Salud Perú                                    | Carlos Padilla Rojas et al       |
| EPI_ISL_491433 | Laboratorio de Referencia Nacional de Virus Respiratorio. Instituto Nacional de Salud Perú                                    | Laboratorio de Referencia Nacional de Biotecnología y Biología Molecular. Instituto Nacional de Salud Perú                                    | Carlos Padilla Rojas et al       |
| EPI_ISL_491434 | Laboratorio de Referencia Nacional de Virus Respiratorio. Instituto Nacional de Salud Perú                                    | Laboratorio de Referencia Nacional de Biotecnología y Biología Molecular. Instituto Nacional de Salud Perú                                    | Carlos Padilla Rojas et al       |
| EPI_ISL_491436 | Laboratorio de Referencia Nacional de Virus Respiratorio. Instituto Nacional de Salud Perú                                    | Laboratorio de Referencia Nacional de Biotecnología y Biología Molecular. Instituto Nacional de Salud Perú                                    | Carlos Padilla Rojas et al       |
| EPI_ISL_491458 | Laboratorio de Referencia Nacional de Virus Respiratorio. Instituto Nacional de Salud Perú                                    | Laboratorio de Referencia Nacional de Biotecnología y Biología Molecular. Instituto Nacional de Salud Perú                                    | Carlos Padilla Rojas et al       |
| EPI_ISL_516721 | Laboratorio de Referencia Nacional de Virus Respiratorio. Centro Nacional de Salud Publica. Instituto Nacional de Salud Peru. | Laboratorio de Referencia Nacional de Biotecnología y Biología Molecular. Centro Nacional de Salud Publica. Instituto Nacional de Salud Peru. | Carlos Padilla Rojas et al       |
| EPI_ISL_536477 | Instituto Nacional de Salud                                                                                                   | Laboratorio de Infecciones Respiratorias Agudas                                                                                               | Eduardo Juscamayta Lopez et al   |
| EPI_ISL_536478 | Instituto Nacional de Salud                                                                                                   | Laboratorio de Infecciones Respiratorias Agudas                                                                                               | Eduardo Juscamayta Lopez et al   |
| EPI_ISL_536485 | Instituto Nacional de Salud                                                                                                   | Laboratorio de Infecciones Respiratorias Agudas                                                                                               | Eduardo Juscamayta Lopez et al   |
| EPI_ISL_536486 | Instituto Nacional de Salud                                                                                                   | Laboratorio de Infecciones Respiratorias Agudas                                                                                               | Eduardo Juscamayta Lopez et al   |
| EPI_ISL_536487 | Instituto Nacional de Salud                                                                                                   | Laboratorio de Infecciones Respiratorias Agudas                                                                                               | Eduardo Juscamayta Lopez et al   |
| EPI_ISL_536488 | Instituto Nacional de Salud                                                                                                   | Laboratorio de Infecciones Respiratorias Agudas                                                                                               | Eduardo Juscamayta Lopez et al   |
| EPI_ISL_536489 | Instituto Nacional de Salud                                                                                                   | Laboratorio de Infecciones Respiratorias Agudas                                                                                               | Eduardo Juscamayta Lopez et al   |











|                |                                                                                                                   |                                                                                                                                  |                          |
|----------------|-------------------------------------------------------------------------------------------------------------------|----------------------------------------------------------------------------------------------------------------------------------|--------------------------|
| EPI_ISL_491298 | Rural Health Unit - Calauan, Laguna                                                                               | Research Institute for Tropical Medicine                                                                                         | Tujan et al              |
| EPI_ISL_491474 | Research Institute for Tropical Medicine                                                                          | Research Institute for Tropical Medicine                                                                                         | Ma. Angelica Tujan et al |
| EPI_ISL_833336 | Bureau of Quarantine                                                                                              | Research Institute for Tropical Medicine                                                                                         | Hannah Leah Morito et al |
| EPI_ISL_833338 | Siniloan Rural Health Unit                                                                                        | Research Institute for Tropical Medicine                                                                                         | Hannah Leah Morito et al |
| EPI_ISL_833334 | Batangas City Health Office                                                                                       | Research Institute for Tropical Medicine                                                                                         | Hannah Leah Morito et al |
| EPI_ISL_833333 | Batangas City Health Office                                                                                       | Research Institute for Tropical Medicine                                                                                         | Hannah Leah Morito et al |
| EPI_ISL_833340 | Batangas City Health Office                                                                                       | Research Institute for Tropical Medicine                                                                                         | Hannah Leah Morito et al |
| EPI_ISL_430456 | Rizal Medical Center                                                                                              | Research Institute for Tropical Medicine                                                                                         | Medado et al             |
| EPI_ISL_430843 | Bethany Hospital                                                                                                  | Research Institute for Tropical Medicine                                                                                         | Medado et al             |
| EPI_ISL_430845 | Pasig City General Hospital                                                                                       | Research Institute for Tropical Medicine                                                                                         | Medado et al             |
| EPI_ISL_428236 | Hematology Laboratory, Section of Molecular Diagnostics, University Clinical Centre, Medical University of Gdansk | Department of Virology, Faculty of Medicine, University of Helsinki, Helsinki, Finland                                           | Marlena Robakowska et al |
| EPI_ISL_512296 | Hematology Laboratory, Section of Molecular Diagnostics, University Clinical Centre, Medical University of Gdansk | Department of Virology, Faculty of Medicine, University of Helsinki, Helsinki, Finland                                           | Maciej Grzybek et al     |
| EPI_ISL_512297 | Hematology Laboratory, Section of Molecular Diagnostics, University Clinical Centre, Medical University of Gdansk | Department of Virology, Faculty of Medicine, University of Helsinki, Helsinki, Finland                                           | Maciej Grzybek et al     |
| EPI_ISL_512299 | Hematology Laboratory, Section of Molecular Diagnostics, University Clinical Centre, Medical University of Gdansk | Department of Virology, Faculty of Medicine, University of Helsinki, Helsinki, Finland                                           | Maciej Grzybek et al     |
| EPI_ISL_512301 | Hematology Laboratory, Section of Molecular Diagnostics, University Clinical Centre, Medical University of Gdansk | Department of Virology, Faculty of Medicine, University of Helsinki, Helsinki, Finland                                           | Maciej Grzybek et al     |
| EPI_ISL_876024 | Laboratory of Molecular Biology, Diagnostyka sp. z o.o.                                                           | genXone SA, Research & Development Laboratory                                                                                    | Maciej Sykulski et al    |
| EPI_ISL_980808 | genXone SA, Molecular Diagnostics Laboratory / NZOZ                                                               | genXone SA, Research & Development Laboratory                                                                                    | Maciej Sykulski et al    |
| EPI_ISL_875982 | Laboratory of Molecular Biology, Diagnostyka sp. z o.o.                                                           | genXone SA, Research & Development Laboratory                                                                                    | Maciej Sykulski et al    |
| EPI_ISL_925036 | Laboratory of Molecular Biology, Diagnostyka sp. z o.o.                                                           | genXone SA, Research & Development Laboratory                                                                                    | Maciej Sykulski et al    |
| EPI_ISL_875985 | Laboratory of Molecular Biology, Diagnostyka sp. z o.o.                                                           | genXone SA, Research & Development Laboratory                                                                                    | Maciej Sykulski et al    |
| EPI_ISL_876006 | Laboratory of Molecular Biology, Diagnostyka sp. z o.o.                                                           | genXone SA, Research & Development Laboratory                                                                                    | Maciej Sykulski et al    |
| EPI_ISL_875991 | Laboratory of Molecular Biology, Diagnostyka sp. z o.o.                                                           | genXone SA, Research & Development Laboratory                                                                                    | Maciej Sykulski et al    |
| EPI_ISL_875992 | Laboratory of Molecular Biology, Diagnostyka sp. z o.o.                                                           | genXone SA, Research & Development Laboratory                                                                                    | Maciej Sykulski et al    |
| EPI_ISL_876023 | Laboratory of Molecular Biology, Diagnostyka sp. z o.o.                                                           | genXone SA, Research & Development Laboratory                                                                                    | Maciej Sykulski et al    |
| EPI_ISL_582031 | Institute of Human Genetics, Polish Academy of Sciences                                                           | Institute of Human Genetics, Polish Academy of Sciences                                                                          | Szymon Hryhorowicz et al |
| EPI_ISL_462480 | Institute of Human Genetics, Polish Academy of Sciences                                                           | Institute of Human Genetics, Polish Academy of Sciences                                                                          | Szymon Hryhorowicz et al |
| EPI_ISL_485399 | Institute of Human Genetics, Polish Academy of Sciences                                                           | Institute of Human Genetics, Polish Academy of Sciences                                                                          | Szymon Hryhorowicz et al |
| EPI_ISL_754904 | Laboratory Diagnostics and Clinical Immunology of Developmental Age, Medical University of Warsaw                 | genXone SA, Research & Development Laboratory; The Faculty of Mathematics, Informatics and Mechanics of the University of Warsaw | Maciej Sykulski et al    |
| EPI_ISL_754906 | Laboratory Diagnostics and Clinical Immunology of Developmental Age, Medical University of Warsaw                 | genXone SA, Research & Development Laboratory; The Faculty of Mathematics, Informatics and Mechanics of the University of Warsaw | Maciej Sykulski et al    |
| EPI_ISL_754905 | Laboratory Diagnostics and Clinical Immunology of Developmental Age, Medical University of Warsaw                 | genXone SA, Research & Development Laboratory; The Faculty of Mathematics, Informatics and Mechanics of the University of Warsaw | Maciej Sykulski et al    |
| EPI_ISL_754913 | Laboratory Diagnostics and Clinical Immunology of Developmental Age, Medical University of Warsaw                 | genXone SA, Research & Development Laboratory; The Faculty of Mathematics, Informatics and Mechanics of the University of Warsaw | Maciej Sykulski et al    |
| EPI_ISL_754909 | Laboratory Diagnostics and Clinical Immunology of Developmental Age, Medical University of Warsaw                 | genXone SA, Research & Development Laboratory; The Faculty of Mathematics, Informatics and Mechanics of the University of Warsaw | Maciej Sykulski et al    |
| EPI_ISL_754910 | Laboratory Diagnostics and Clinical Immunology of Developmental Age, Medical University of Warsaw                 | genXone SA, Research & Development Laboratory; The Faculty of Mathematics, Informatics and Mechanics of the University of Warsaw | Maciej Sykulski et al    |
| EPI_ISL_882957 | Specjalistyczny Szpital im. Dra A. Sokołowskiego                                                                  | National Institute of Public Health - National Institute of Hygiene                                                              | Wolkowicz Tomasz et al   |

|                |                                                                                                                                                                                                                                                                                                 |                                                                                                                                                                                                                                                                                                  |                           |
|----------------|-------------------------------------------------------------------------------------------------------------------------------------------------------------------------------------------------------------------------------------------------------------------------------------------------|--------------------------------------------------------------------------------------------------------------------------------------------------------------------------------------------------------------------------------------------------------------------------------------------------|---------------------------|
| EPI_ISL_882960 | Laboratorium Diagnostyki Mikrobiologicznej z Pracownią Prątką Gruźlicy SPSzW im. Jana Bożego w Lublinie                                                                                                                                                                                         | National Institute of Public Health - National Institute of Hygiene                                                                                                                                                                                                                              | Wołkowicz Tomasz et al    |
| EPI_ISL_882961 | Laboratorium Diagnostyki Mikrobiologicznej z Pracownią Prątką Gruźlicy SPSzW im. Jana Bożego w Lublinie                                                                                                                                                                                         | National Institute of Public Health - National Institute of Hygiene                                                                                                                                                                                                                              | Wołkowicz Tomasz et al    |
| EPI_ISL_882962 | National Institute of Public Health - National Institute of Hygiene                                                                                                                                                                                                                             | National Institute of Public Health - National Institute of Hygiene                                                                                                                                                                                                                              | Wołkowicz Tomasz et al    |
| EPI_ISL_905733 | National Institute of Public Health - National Institute of Hygiene                                                                                                                                                                                                                             | National Institute of Public Health - National Institute of Hygiene                                                                                                                                                                                                                              | Wołkowicz Tomasz et al    |
| EPI_ISL_905738 | National Institute of Public Health - National Institute of Hygiene                                                                                                                                                                                                                             | National Institute of Public Health - National Institute of Hygiene                                                                                                                                                                                                                              | Wołkowicz Tomasz et al    |
| EPI_ISL_905744 | National Institute of Public Health - National Institute of Hygiene                                                                                                                                                                                                                             | National Institute of Public Health - National Institute of Hygiene                                                                                                                                                                                                                              | Wołkowicz Tomasz et al    |
| EPI_ISL_905758 | National Institute of Public Health - National Institute of Hygiene                                                                                                                                                                                                                             | National Institute of Public Health - National Institute of Hygiene                                                                                                                                                                                                                              | Wołkowicz Tomasz et al    |
| EPI_ISL_645025 | Human Genome Variation Research Group, Malopolska Centre of Biotechnology                                                                                                                                                                                                                       | Human Genome Variation Research Group, Malopolska Centre of Biotechnology                                                                                                                                                                                                                        | Kowalski et al            |
| EPI_ISL_645043 | Human Genome Variation Research Group, Malopolska Centre of Biotechnology                                                                                                                                                                                                                       | Human Genome Variation Research Group, Malopolska Centre of Biotechnology                                                                                                                                                                                                                        | Kowalski et al            |
| EPI_ISL_645057 | Human Genome Variation Research Group, Malopolska Centre of Biotechnology                                                                                                                                                                                                                       | Human Genome Variation Research Group, Malopolska Centre of Biotechnology                                                                                                                                                                                                                        | Kowalski et al            |
| EPI_ISL_645060 | Human Genome Variation Research Group, Malopolska Centre of Biotechnology                                                                                                                                                                                                                       | Human Genome Variation Research Group, Malopolska Centre of Biotechnology                                                                                                                                                                                                                        | Kowalski et al            |
| EPI_ISL_645061 | Human Genome Variation Research Group, Malopolska Centre of Biotechnology                                                                                                                                                                                                                       | Human Genome Variation Research Group, Malopolska Centre of Biotechnology                                                                                                                                                                                                                        | Kowalski et al            |
| EPI_ISL_645062 | Human Genome Variation Research Group, Malopolska Centre of Biotechnology                                                                                                                                                                                                                       | Human Genome Variation Research Group, Malopolska Centre of Biotechnology                                                                                                                                                                                                                        | Kowalski et al            |
| EPI_ISL_645064 | Human Genome Variation Research Group, Malopolska Centre of Biotechnology                                                                                                                                                                                                                       | Human Genome Variation Research Group, Malopolska Centre of Biotechnology                                                                                                                                                                                                                        | Kowalski et al            |
| EPI_ISL_416488 | ViroGenetics - BSL3 Laboratory of Virology; Human Genome Variation Research Group & Genomics Centre MCB; Bioinformatics Research Group Department of Virology                                                                                                                                   | ViroGenetics - BSL3 Laboratory of Virology; Human Genome Variation Research Group & Genomics Centre MCB; Bioinformatics Research Group Department of Virology                                                                                                                                    | Aleksandra Milewska et al |
| EPI_ISL_455442 | 1. ViroGenetics - BSL3 Laboratory of Virology, Małopolska Centre of Biotechnology, Jagiellonian University; 2. II Department of Internal Medicine, Faculty of Medicine, Jagiellonian University Medical College; 3. Narodowy Instytut Zdrowia Publicznego – Państwowy Zakład Higieny (NIZP-PZH) | 1. ViroGenetics - BSL3 Laboratory of Virology, Małopolska Centre of Biotechnology, Jagiellonian University; 2. II Department of Internal Medicine, Faculty of Medicine, Jagiellonian University Medical College; 3. Narodowy Instytut Zdrowia Publicznego – Państwowy Zakład Higieny (NIZP-PZH). | Katarzyna Pancer et al    |
| EPI_ISL_455444 | 1. ViroGenetics - BSL3 Laboratory of Virology, Małopolska Centre of Biotechnology, Jagiellonian University; 2. II Department of Internal Medicine, Faculty of Medicine, Jagiellonian University Medical College; 3. Narodowy Instytut Zdrowia Publicznego – Państwowy Zakład Higieny (NIZP-PZH) | 1. ViroGenetics - BSL3 Laboratory of Virology, Małopolska Centre of Biotechnology, Jagiellonian University; 2. II Department of Internal Medicine, Faculty of Medicine, Jagiellonian University Medical College; 3. Narodowy Instytut Zdrowia Publicznego – Państwowy Zakład Higieny (NIZP-PZH). | Katarzyna Pancer et al    |
| EPI_ISL_455451 | 1. ViroGenetics - BSL3 Laboratory of Virology, Małopolska Centre of Biotechnology, Jagiellonian University; 2. II Department of Internal Medicine, Faculty of Medicine, Jagiellonian University Medical College; 3. Narodowy Instytut Zdrowia Publicznego – Państwowy Zakład Higieny (NIZP-PZH) | 1. ViroGenetics - BSL3 Laboratory of Virology, Małopolska Centre of Biotechnology, Jagiellonian University; 2. II Department of Internal Medicine, Faculty of Medicine, Jagiellonian University Medical College; 3. Narodowy Instytut Zdrowia Publicznego – Państwowy Zakład Higieny (NIZP-PZH). | Katarzyna Pancer et al    |
| EPI_ISL_428209 | Laboratory of Molecular Biology, Diagnostyka sp. z o.o.                                                                                                                                                                                                                                         | Laboratory of Recombinant Vaccines                                                                                                                                                                                                                                                               | Lukasz Rabalski et al     |
| EPI_ISL_451644 | Laboratory of Molecular Biology, Diagnostyka sp. z o.o.                                                                                                                                                                                                                                         | Laboratory of Recombinant Vaccines                                                                                                                                                                                                                                                               | Lukasz Rabalski et al     |
| EPI_ISL_451645 | Laboratory of Molecular Biology, Diagnostyka sp. z o.o.                                                                                                                                                                                                                                         | Laboratory of Recombinant Vaccines                                                                                                                                                                                                                                                               | Lukasz Rabalski et al     |
| EPI_ISL_451648 | Hematology Laboratory, Section of Molecular Diagnostics, University Clinical Centre, Medical University of Gdansk                                                                                                                                                                               | Laboratory of Recombinant Vaccines                                                                                                                                                                                                                                                               | Lukasz Rabalski et al     |
| EPI_ISL_451650 | Hematology Laboratory, Section of Molecular Diagnostics, University Clinical Centre, Medical University of Gdansk                                                                                                                                                                               | Laboratory of Recombinant Vaccines                                                                                                                                                                                                                                                               | Lukasz Rabalski et al     |
| EPI_ISL_906711 | Hematology Laboratory, Section of Molecular Diagnostics, University Clinical Centre, Medical University of Gdansk                                                                                                                                                                               | Laboratory of Recombinant Vaccines                                                                                                                                                                                                                                                               | Lukasz Rabalski et al     |

|                |                                                                                                                                                                                              |                                                                                                                       |                       |
|----------------|----------------------------------------------------------------------------------------------------------------------------------------------------------------------------------------------|-----------------------------------------------------------------------------------------------------------------------|-----------------------|
| EPI_ISL_930784 | Hematology Laboratory, Section of Molecular Diagnostics, University Clinical Centre, Medical University of Gdansk                                                                            | Laboratory of Recombinant Vaccines                                                                                    | Lukasz Rabalski et al |
| EPI_ISL_906731 | Hematology Laboratory, Section of Molecular Diagnostics, University Clinical Centre, Medical University of Gdansk                                                                            | Laboratory of Recombinant Vaccines                                                                                    | Lukasz Rabalski et al |
| EPI_ISL_906752 | Hematology Laboratory, Section of Molecular Diagnostics, University Clinical Centre, Medical University of Gdansk                                                                            | Laboratory of Recombinant Vaccines                                                                                    | Lukasz Rabalski et al |
| EPI_ISL_437625 | Laboratory of Genomics & Bioinformatics, Institute of Immunology and Experimental Therapy, Polish Academy of Sciences Oddzial Mikrobiologii Wojewodzkiej Stacji Sanitarno-Epidemiologicznej. | Laboratory of Genomics & Bioinformatics, Institute of Immunology and Experimental Therapy, Polish Academy of Sciences | Dorota Kujawa et al   |
| EPI_ISL_491185 | Instituto Gulbenkian de Ciéncia                                                                                                                                                              | Instituto Gulbenkian de Ciéncia                                                                                       | João Costa et al      |
| EPI_ISL_491189 | Instituto Gulbenkian de Ciéncia                                                                                                                                                              | Instituto Gulbenkian de Ciéncia                                                                                       | João Costa et al      |
| EPI_ISL_491190 | Instituto Gulbenkian de Ciéncia                                                                                                                                                              | Instituto Gulbenkian de Ciéncia                                                                                       | João Costa et al      |
| EPI_ISL_491202 | Instituto Gulbenkian de Ciéncia                                                                                                                                                              | Instituto Gulbenkian de Ciéncia                                                                                       | Cathy Paulino et al   |
| EPI_ISL_491203 | Instituto Gulbenkian de Ciéncia                                                                                                                                                              | Instituto Gulbenkian de Ciéncia                                                                                       | Cathy Paulino et al   |
| EPI_ISL_491224 | Instituto Gulbenkian de Ciéncia                                                                                                                                                              | Instituto Gulbenkian de Ciéncia                                                                                       | Cathy Paulino et al   |
| EPI_ISL_491228 | Instituto Gulbenkian de Ciéncia                                                                                                                                                              | Instituto Gulbenkian de Ciéncia                                                                                       | Cathy Paulino et al   |
| EPI_ISL_491231 | Instituto Gulbenkian de Ciéncia                                                                                                                                                              | Instituto Gulbenkian de Ciéncia                                                                                       | Joao Sobral et al     |
| EPI_ISL_491242 | Instituto Gulbenkian de Ciéncia                                                                                                                                                              | Instituto Gulbenkian de Ciéncia                                                                                       | Joao Sobral et al     |
| EPI_ISL_491246 | Instituto Gulbenkian de Ciéncia                                                                                                                                                              | Instituto Gulbenkian de Ciéncia                                                                                       | Joao Sobral et al     |
| EPI_ISL_491248 | Instituto Gulbenkian de Ciéncia                                                                                                                                                              | Instituto Gulbenkian de Ciéncia                                                                                       | Joao Sobral et al     |
| EPI_ISL_491258 | Instituto Gulbenkian de Ciéncia                                                                                                                                                              | Instituto Gulbenkian de Ciéncia                                                                                       | Joao Sobral et al     |
| EPI_ISL_491259 | Instituto Gulbenkian de Ciéncia                                                                                                                                                              | Instituto Gulbenkian de Ciéncia                                                                                       | Joao Sobral et al     |
| EPI_ISL_491262 | Instituto Gulbenkian de Ciéncia                                                                                                                                                              | Instituto Gulbenkian de Ciéncia                                                                                       | Joao Sobral et al     |
| EPI_ISL_960703 | Germano de sousa                                                                                                                                                                             | Instituto Gulbenkian de Ciencia                                                                                       | Cathy Paulino et al   |
| EPI_ISL_960728 | Germano de sousa                                                                                                                                                                             | Instituto Gulbenkian de Ciencia                                                                                       | Cathy Paulino et al   |
| EPI_ISL_960776 | Germano de sousa                                                                                                                                                                             | Instituto Gulbenkian de Ciencia                                                                                       | João Costa et al      |
| EPI_ISL_960829 | Germano de sousa                                                                                                                                                                             | Instituto Gulbenkian de Ciencia                                                                                       | João Costa et al      |
| EPI_ISL_960813 | Germano de sousa                                                                                                                                                                             | Instituto Gulbenkian de Ciencia                                                                                       | João Sobral et al     |
| EPI_ISL_960707 | Germano de sousa                                                                                                                                                                             | Instituto Gulbenkian de Ciencia                                                                                       | João Sobral et al     |
| EPI_ISL_421449 | H Dr. Nelio Mendonca - Funchal                                                                                                                                                               | Instituto Nacional de Saude (INSA)                                                                                    | Guiomar et al et al   |
| EPI_ISL_421483 | CH VN Gaia - Espinho                                                                                                                                                                         | Instituto Nacional de Saude (INSA)                                                                                    | Guiomar et al et al   |
| EPI_ISL_453816 | unknown                                                                                                                                                                                      | Instituto Nacional de Saude (INSA)                                                                                    | Borges et al et al    |
| EPI_ISL_453850 | unknown                                                                                                                                                                                      | Instituto Nacional de Saude (INSA)                                                                                    | Borges et al et al    |
| EPI_ISL_453993 | unknown                                                                                                                                                                                      | Instituto Nacional de Saude (INSA)                                                                                    | Borges et al et al    |
| EPI_ISL_453996 | unknown                                                                                                                                                                                      | Instituto Nacional de Saude (INSA)                                                                                    | Borges et al et al    |
| EPI_ISL_454162 | unknown                                                                                                                                                                                      | Instituto Nacional de Saude (INSA)                                                                                    | Borges et al et al    |
| EPI_ISL_454163 | unknown                                                                                                                                                                                      | Instituto Nacional de Saude (INSA)                                                                                    | Borges et al et al    |
| EPI_ISL_454164 | unknown                                                                                                                                                                                      | Instituto Nacional de Saude (INSA)                                                                                    | Borges et al et al    |
| EPI_ISL_454175 | unknown                                                                                                                                                                                      | Instituto Nacional de Saude (INSA)                                                                                    | Borges et al et al    |
| EPI_ISL_454221 | unknown                                                                                                                                                                                      | Instituto Nacional de Saude (INSA)                                                                                    | Borges et al et al    |
| EPI_ISL_454225 | unknown                                                                                                                                                                                      | Instituto Nacional de Saude (INSA)                                                                                    | Borges et al et al    |
| EPI_ISL_454325 | unknown                                                                                                                                                                                      | Instituto Nacional de Saude (INSA)                                                                                    | Borges et al et al    |





|                |                                                                                                                  |                                                                                                 |                       |
|----------------|------------------------------------------------------------------------------------------------------------------|-------------------------------------------------------------------------------------------------|-----------------------|
| EPI_ISL_941896 | Instituto Nacional de Saude (INSA) and Instituto Gulbenkian de Ciencia (IGC)                                     | Instituto Nacional de Saude (INSA) and Instituto Gulbenkian de Ciencia (IGC)                    | Borges et al et al    |
| EPI_ISL_491268 | Instituto Gulbenkian de Ciêncïa                                                                                  | Instituto Gulbenkian de Ciêncïa                                                                 | Susana Ladeiro et al  |
| EPI_ISL_491275 | Instituto Gulbenkian de Ciêncïa                                                                                  | Instituto Gulbenkian de Ciêncïa                                                                 | Susana Ladeiro et al  |
| EPI_ISL_491288 | Instituto Gulbenkian de Ciêncïa                                                                                  | Instituto Gulbenkian de Ciêncïa                                                                 | Susana Ladeiro et al  |
| EPI_ISL_491289 | Instituto Gulbenkian de Ciêncïa                                                                                  | Instituto Gulbenkian de Ciêncïa                                                                 | Susana Ladeiro et al  |
| EPI_ISL_491291 | Instituto Gulbenkian de Ciêncïa                                                                                  | Instituto Gulbenkian de Ciêncïa                                                                 | Susana Ladeiro et al  |
| EPI_ISL_491294 | Instituto Gulbenkian de Ciêncïa                                                                                  | Instituto Gulbenkian de Ciêncïa                                                                 | Susana Ladeiro et al  |
| EPI_ISL_491297 | Instituto Gulbenkian de Ciêncïa                                                                                  | Instituto Gulbenkian de Ciêncïa                                                                 | Susana Ladeiro et al  |
| EPI_ISL_850949 | National Institute for Viral Disease Control and Prevention, China CDC                                           | National Institute for Viral Disease Control and Prevention, China CDC                          | Xiang Zhao et al      |
| EPI_ISL_591270 | National Institute for Viral Disease Control and Prevention, China CDC                                           | National Institute for Viral Disease Control and Prevention, China CDC                          | Huilai Ma et al       |
| EPI_ISL_591271 | National Institute for Viral Disease Control and Prevention, China CDC                                           | National Institute for Viral Disease Control and Prevention, China CDC                          | Huilai Ma et al       |
| EPI_ISL_807155 | Deva County Emergency Hospital                                                                                   | National Institute of Infectious Diseases-Prof. Dr. Matei Bals Molecular Diagnostics Laboratory | Leontina Banica et al |
| EPI_ISL_807156 | Deva County Emergency Hospital                                                                                   | National Institute of Infectious Diseases-Prof. Dr. Matei Bals Molecular Diagnostics Laboratory | Leontina Banica et al |
| EPI_ISL_455469 | Laboratory for Respiratory Viruses, Cantacuzino National Military-Medical Institute for Research and Development | Cantacuzino Institute                                                                           | M.Lazar et al         |
| EPI_ISL_455472 | Laboratory for Respiratory Viruses, Cantacuzino National Military-Medical Institute for Research and Development | Cantacuzino Institute                                                                           | M.Lazar et al         |
| EPI_ISL_455468 | Laboratory for Respiratory Viruses, Cantacuzino National Military-Medical Institute for Research and Development | Cantacuzino Institute                                                                           | M.Lazar et al         |
| EPI_ISL_455471 | Laboratory for Respiratory Viruses, Cantacuzino National Military-Medical Institute for Research and Development | Cantacuzino Institute                                                                           | M.Lazar et al         |
| EPI_ISL_455476 | Laboratory for Respiratory Viruses, Cantacuzino National Military-Medical Institute for Research and Development | Cantacuzino Institute                                                                           | M.Lazar et al         |
| EPI_ISL_807154 | Deva County Emergency Hospital                                                                                   | National Institute of Infectious Diseases-Prof. Dr. Matei Bals Molecular Diagnostics Laboratory | Leontina Banica et al |
| EPI_ISL_885153 | National Institute of Infectious Diseases-Prof. Dr. Matei Bals Molecular Diagnostics Laboratory                  | National Institute of Infectious Diseases-Prof. Dr. Matei Bals Molecular Diagnostics Laboratory | Leontina Banica et al |
| EPI_ISL_885154 | National Institute of Infectious Diseases-Prof. Dr. Matei Bals Molecular Diagnostics Laboratory                  | National Institute of Infectious Diseases-Prof. Dr. Matei Bals Molecular Diagnostics Laboratory | Leontina Banica et al |
| EPI_ISL_979799 | National Institute of Infectious Diseases-Prof. Dr. Matei Bals Molecular Diagnostics Laboratory                  | National Institute of Infectious Diseases-Prof. Dr. Matei Bals Molecular Diagnostics Laboratory | Leontina Banica et al |
| EPI_ISL_979964 | National Institute of Infectious Diseases-Prof. Dr. Matei Bals Molecular Diagnostics Laboratory                  | National Institute of Infectious Diseases-Prof. Dr. Matei Bals Molecular Diagnostics Laboratory | Leontina Banica et al |
| EPI_ISL_979965 | National Institute of Infectious Diseases-Prof. Dr. Matei Bals Molecular Diagnostics Laboratory                  | National Institute of Infectious Diseases-Prof. Dr. Matei Bals Molecular Diagnostics Laboratory | Leontina Banica et al |
| EPI_ISL_979968 | National Institute of Infectious Diseases-Prof. Dr. Matei Bals Molecular Diagnostics Laboratory                  | National Institute of Infectious Diseases-Prof. Dr. Matei Bals Molecular Diagnostics Laboratory | Leontina Banica et al |
| EPI_ISL_979969 | National Institute of Infectious Diseases-Prof. Dr. Matei Bals Molecular Diagnostics Laboratory                  | National Institute of Infectious Diseases-Prof. Dr. Matei Bals Molecular Diagnostics Laboratory | Leontina Banica et al |
| EPI_ISL_862832 | National Institute of Infectious Diseases-Prof. Dr. Matei Bals Molecular Diagnostics Laboratory                  | National Institute of Infectious Diseases-Prof. Dr. Matei Bals Molecular Diagnostics Laboratory | Leontina Banica et al |
| EPI_ISL_468151 | [Romania, Bucharest] National Institute for Infectious Diseases "Prof. Dr. Matei Balş"                           | [Romania, Bucharest] National Institute for Infectious Diseases "Prof. Dr. Matei Balş"          | Leontina Banica et al |

|                |                                                                                                                                             |                                                                                                 |                                                                                                 |                       |
|----------------|---------------------------------------------------------------------------------------------------------------------------------------------|-------------------------------------------------------------------------------------------------|-------------------------------------------------------------------------------------------------|-----------------------|
| EPI_ISL_468153 | [Romania, Bucharest] National Institute for Infectious Diseases "Prof. Dr. Matei Balş"                                                      | [Romania, Bucharest] National Institute for Infectious Diseases "Prof. Dr. Matei Balş"          | [Romania, Bucharest] National Institute for Infectious Diseases "Prof. Dr. Matei Balş"          | Leontina Banica et al |
| EPI_ISL_468155 | [Romania, Bucharest] National Institute for Infectious Diseases "Prof. Dr. Matei Balş"                                                      | [Romania, Bucharest] National Institute for Infectious Diseases "Prof. Dr. Matei Balş"          | [Romania, Bucharest] National Institute for Infectious Diseases "Prof. Dr. Matei Balş"          | Leontina Banica et al |
| EPI_ISL_471420 | Laboratory for Respiratory Viruses, National Influenza Centre, Cantacuzino National Military-Medical Institute for Research and Development | Cantacuzino Institute                                                                           | Cantacuzino Institute                                                                           | Luiza Ustea et al     |
| EPI_ISL_471422 | Laboratory for Respiratory Viruses, National Influenza Centre, Cantacuzino National Military-Medical Institute for Research and Development | Cantacuzino Institute                                                                           | Cantacuzino Institute                                                                           | Luiza Ustea et al     |
| EPI_ISL_468134 | [Romania, Bucharest] National Institute for Infectious Diseases "Prof. Dr. Matei Balş"                                                      | [Romania, Bucharest] National Institute for Infectious Diseases "Prof. Dr. Matei Balş"          | [Romania, Bucharest] National Institute for Infectious Diseases "Prof. Dr. Matei Balş"          | Leontina Banica et al |
| EPI_ISL_468135 | [Romania, Bucharest] National Institute for Infectious Diseases "Prof. Dr. Matei Balş"                                                      | [Romania, Bucharest] National Institute for Infectious Diseases "Prof. Dr. Matei Balş"          | [Romania, Bucharest] National Institute for Infectious Diseases "Prof. Dr. Matei Balş"          | Leontina Banica et al |
| EPI_ISL_468145 | [Romania, Bucharest] National Institute for Infectious Diseases "Prof. Dr. Matei Balş"                                                      | [Romania, Bucharest] National Institute for Infectious Diseases "Prof. Dr. Matei Balş"          | [Romania, Bucharest] National Institute for Infectious Diseases "Prof. Dr. Matei Balş"          | Leontina Banica et al |
| EPI_ISL_888678 | Laboratory for Respiratory Viruses, Cantacuzino National Military-Medical Institute for Research and Development                            | Cantacuzino Institute Virology                                                                  | Cantacuzino Institute Virology                                                                  | Luiza Ustea et al     |
| EPI_ISL_910336 | Laboratory for Respiratory Viruses, Cantacuzino National Military-Medical Institute for Research and Development                            | Cantacuzino Institute Virology                                                                  | Cantacuzino Institute Virology                                                                  | Luiza Ustea et al     |
| EPI_ISL_940554 | Laboratory for Respiratory Viruses, Cantacuzino National Military-Medical Institute for Research and Development                            | Cantacuzino Institute Virology                                                                  | Cantacuzino Institute Virology                                                                  | Luiza Ustea et al     |
| EPI_ISL_940144 | Laboratory for Respiratory Viruses, Cantacuzino National Military-Medical Institute for Research and Development                            | Cantacuzino Institute Virology                                                                  | Cantacuzino Institute Virology                                                                  | Luiza Ustea et al     |
| EPI_ISL_471416 | Laboratory for Respiratory Viruses, National Influenza Centre, Cantacuzino National Military-Medical Institute for Research and Development | Cantacuzino Institute                                                                           | Cantacuzino Institute                                                                           | Luiza Ustea et al     |
| EPI_ISL_471423 | Laboratory for Respiratory Viruses, National Influenza Centre, Cantacuzino National Military-Medical Institute for Research and Development | Cantacuzino Institute                                                                           | Cantacuzino Institute                                                                           | Luiza Ustea et al     |
| EPI_ISL_471417 | Laboratory for Respiratory Viruses, National Influenza Centre, Cantacuzino National Military-Medical Institute for Research and Development | Cantacuzino Institute                                                                           | Cantacuzino Institute                                                                           | Luiza Ustea et al     |
| EPI_ISL_471419 | Laboratory for Respiratory Viruses, National Influenza Centre, Cantacuzino National Military-Medical Institute for Research and Development | Cantacuzino Institute                                                                           | Cantacuzino Institute                                                                           | Luiza Ustea et al     |
| EPI_ISL_979967 | National Institute of Infectious Diseases-Prof. Dr. Matei Bals Molecular Diagnostics Laboratory                                             | National Institute of Infectious Diseases-Prof. Dr. Matei Bals Molecular Diagnostics Laboratory | National Institute of Infectious Diseases-Prof. Dr. Matei Bals Molecular Diagnostics Laboratory | Leontina Banica et al |
| EPI_ISL_815390 | Centogene                                                                                                                                   | Centogene                                                                                       | Centogene                                                                                       | Peter Bauer et al     |
| EPI_ISL_815391 | Centogene                                                                                                                                   | Centogene                                                                                       | Centogene                                                                                       | Peter Bauer et al     |
| EPI_ISL_467781 | National Influenza Centre Romania                                                                                                           | Charite Universitätsmedizin Berlin, Institute of Virology                                       | Charite Universitätsmedizin Berlin, Institute of Virology                                       | Victor M Corman et al |
| EPI_ISL_981372 | Laboratory for Respiratory Viruses, "Cantacuzino" National Military-Medical Institute for Research and Development                          | Cantacuzino Institute Virology                                                                  | Cantacuzino Institute Virology                                                                  | Luiza Ustea et al     |
| EPI_ISL_471418 | Laboratory for Respiratory Viruses, National Influenza Centre, Cantacuzino National Military-Medical Institute for Research and Development | Cantacuzino Institute                                                                           | Cantacuzino Institute                                                                           | Luiza Ustea et al     |
| EPI_ISL_794744 | National Institute of Infectious Diseases-Prof. Dr. Matei Bals Molecular Diagnostics Laboratory                                             | National Institute of Infectious Diseases-Prof. Dr. Matei Bals Molecular Diagnostics Laboratory | National Institute of Infectious Diseases-Prof. Dr. Matei Bals Molecular Diagnostics Laboratory | Leontina Banica et al |
| EPI_ISL_862835 | National Institute of Infectious Diseases-Prof. Dr. Matei Bals Molecular Diagnostics Laboratory                                             | National Institute of Infectious Diseases-Prof. Dr. Matei Bals Molecular Diagnostics Laboratory | National Institute of Infectious Diseases-Prof. Dr. Matei Bals Molecular Diagnostics Laboratory | Leontina Banica et al |

|                |                                                                                                                                                   |                                                                                                    |                            |
|----------------|---------------------------------------------------------------------------------------------------------------------------------------------------|----------------------------------------------------------------------------------------------------|----------------------------|
| EPI_ISL_979798 | National Institute of Infectious Diseases-Prof. Dr. Matei Bals<br>Molecular Diagnostics Laboratory                                                | National Institute of Infectious Diseases-Prof. Dr. Matei Bals<br>Molecular Diagnostics Laboratory | Leontina Banica et al      |
| EPI_ISL_471421 | Laboratory for Respiratory Viruses, National Influenza Centre,<br>Cantacuzino National Military-Medical Institute for Research and<br>Development | Cantacuzino Institute                                                                              | Luiza Ustea et al          |
| EPI_ISL_468156 | [Romania, Bucharest] National Institute for Infectious Diseases "Prof.<br>Dr. Matei Balș"                                                         | [Romania, Bucharest] National Institute for Infectious Diseases<br>"Prof. Dr. Matei Balș"          | Leontina Banica et al      |
| EPI_ISL_491039 | Suceava County Emergency Hospital                                                                                                                 | "Stefan cel Mare" University Metagenomics Lab                                                      | Lobiuc Andrei et al. et al |
| EPI_ISL_491041 | Suceava County Emergency Hospital                                                                                                                 | "Stefan cel Mare" University Metagenomics Lab                                                      | Lobiuc Andrei et al. et al |
| EPI_ISL_491043 | Suceava County Emergency Hospital                                                                                                                 | "Stefan cel Mare" University Metagenomics Lab                                                      | Lobiuc Andrei et al        |
| EPI_ISL_491044 | Suceava County Emergency Hospital                                                                                                                 | "Stefan cel Mare" University Metagenomics Lab                                                      | Lobiuc Andrei et al. et al |
| EPI_ISL_491046 | Suceava County Emergency Hospital                                                                                                                 | "Stefan cel Mare" University Metagenomics Lab                                                      | Lobiuc Andrei et al        |
| EPI_ISL_491047 | Suceava County Emergency Hospital                                                                                                                 | "Stefan cel Mare" University Metagenomics Lab                                                      | Lobiuc Andrei et al        |
| EPI_ISL_486854 | Emergency County Hospital Suceava                                                                                                                 | Stefan cel Mare, University Metagenomics lab                                                       | Lobiuc Andrei et al. et al |
| EPI_ISL_491049 | Suceava County Emergency Hospital                                                                                                                 | "Stefan cel Mare" University Metagenomics Lab                                                      | Lobiuc Andrei et al        |
| EPI_ISL_491053 | Suceava County Emergency Hospital                                                                                                                 | "Stefan cel Mare" University Metagenomics Lab                                                      | Lobiuc Andrei et al. et al |
| EPI_ISL_896373 | University of Medicine and Pharmacy of Craiova                                                                                                    | "Stefan cel Mare" University Metagenomics Lab                                                      | Lobiuc Andrei et al        |
| EPI_ISL_896374 | University of Medicine and Pharmacy of Craiova                                                                                                    | "Stefan cel Mare" University Metagenomics Lab                                                      | Lobiuc Andrei et al        |
| EPI_ISL_896375 | University of Medicine and Pharmacy of Craiova                                                                                                    | "Stefan cel Mare" University Metagenomics Lab                                                      | Lobiuc Andrei et al        |
| EPI_ISL_891221 | University of Medicine and Pharmacy of Craiova                                                                                                    | "Stefan cel Mare" University Metagenomics Lab                                                      | Lobiuc Andrei et al        |
| EPI_ISL_896376 | University of Medicine and Pharmacy of Craiova                                                                                                    | "Stefan cel Mare" University Metagenomics Lab                                                      | Lobiuc Andrei et al        |
| EPI_ISL_891228 | University of Medicine and Pharmacy of Craiova                                                                                                    | "Stefan cel Mare" University Metagenomics Lab                                                      | Lobiuc Andrei et al        |
| EPI_ISL_891227 | The Oncology Institute "Prof. Dr. Ion Chiricuta" Cluj Napoca                                                                                      | "Stefan cel Mare" University Metagenomics Lab                                                      | Lobiuc Andrei et al        |
| EPI_ISL_891224 | The Oncology Institute "Prof. Dr. Ion Chiricuta" Cluj Napoca                                                                                      | "Stefan cel Mare" University Metagenomics Lab                                                      | Lobiuc Andrei et al        |
| EPI_ISL_891226 | The Oncology Institute "Prof. Dr. Ion Chiricuta" Cluj Napoca                                                                                      | "Stefan cel Mare" University Metagenomics Lab                                                      | Lobiuc Andrei et al        |
| EPI_ISL_891225 | The Oncology Institute "Prof. Dr. Ion Chiricuta" Cluj Napoca                                                                                      | "Stefan cel Mare" University Metagenomics Lab                                                      | Lobiuc Andrei et al        |
| EPI_ISL_896377 | University of Medicine and Pharmacy of Craiova                                                                                                    | "Stefan cel Mare" University Metagenomics Lab                                                      | Lobiuc Andrei et al        |
| EPI_ISL_468138 | [Romania, Bucharest] National Institute for Infectious Diseases "Prof.<br>Dr. Matei Balș"                                                         | [Romania, Bucharest] National Institute for Infectious Diseases<br>"Prof. Dr. Matei Balș"          | Leontina Banica et al      |
| EPI_ISL_468140 | [Romania, Bucharest] National Institute for Infectious Diseases "Prof.<br>Dr. Matei Balș"                                                         | [Romania, Bucharest] National Institute for Infectious Diseases<br>"Prof. Dr. Matei Balș"          | Leontina Banica et al      |
| EPI_ISL_468142 | [Romania, Bucharest] National Institute for Infectious Diseases "Prof.<br>Dr. Matei Balș"                                                         | [Romania, Bucharest] National Institute for Infectious Diseases<br>"Prof. Dr. Matei Balș"          | Leontina Banica et al      |
| EPI_ISL_468144 | [Romania, Bucharest] National Institute for Infectious Diseases "Prof.<br>Dr. Matei Balș"                                                         | [Romania, Bucharest] National Institute for Infectious Diseases<br>"Prof. Dr. Matei Balș"          | Leontina Banica et al      |
| EPI_ISL_738319 | Landstuhl Regional Medical Center                                                                                                                 | United States Air Force School of Aerospace Medicine                                               | Anthony Fries et al        |
| EPI_ISL_738324 | Landstuhl Regional Medical Center                                                                                                                 | United States Air Force School of Aerospace Medicine                                               | Anthony Fries et al        |
| EPI_ISL_738326 | Landstuhl Regional Medical Center                                                                                                                 | United States Air Force School of Aerospace Medicine                                               | Anthony Fries et al        |
| EPI_ISL_738341 | Landstuhl Regional Medical Center                                                                                                                 | United States Air Force School of Aerospace Medicine                                               | Anthony Fries et al        |
| EPI_ISL_738342 | Landstuhl Regional Medical Center                                                                                                                 | United States Air Force School of Aerospace Medicine                                               | Anthony Fries et al        |
| EPI_ISL_738343 | Landstuhl Regional Medical Center                                                                                                                 | United States Air Force School of Aerospace Medicine                                               | Anthony Fries et al        |
| EPI_ISL_738344 | Landstuhl Regional Medical Center                                                                                                                 | United States Air Force School of Aerospace Medicine                                               | Anthony Fries et al        |



|                |                                                                                                                                                                                                                |                                                                                                        |                         |
|----------------|----------------------------------------------------------------------------------------------------------------------------------------------------------------------------------------------------------------|--------------------------------------------------------------------------------------------------------|-------------------------|
| EPI_ISL_935017 | Laboratory for Respiratory Viruses, Cantacuzino National Military-Medical Institute for Research and Development                                                                                               | Cantacuzino Institute Virology                                                                         | Luiza Ustea et al       |
| EPI_ISL_733164 | Pathogenic Microorganisms Variability Laboratory                                                                                                                                                               | WHO National Influenza Centre Russian Federation                                                       | Andrey Komissarov et al |
| EPI_ISL_733170 | Pathogenic Microorganisms Variability Laboratory                                                                                                                                                               | WHO National Influenza Centre Russian Federation                                                       | Andrey Komissarov et al |
| EPI_ISL_733174 | Pathogenic Microorganisms Variability Laboratory                                                                                                                                                               | WHO National Influenza Centre Russian Federation                                                       | Andrey Komissarov et al |
| EPI_ISL_733180 | Pathogenic Microorganisms Variability Laboratory                                                                                                                                                               | WHO National Influenza Centre Russian Federation                                                       | Andrey Komissarov et al |
| EPI_ISL_733221 | Pathogenic Microorganisms Variability Laboratory                                                                                                                                                               | WHO National Influenza Centre Russian Federation                                                       | Andrey Komissarov et al |
| EPI_ISL_428894 | State Research Center of Virology and Biotechnology VECTOR, Department of Collection of Microorganisms                                                                                                         | State Research Center of Virology and Biotechnology VECTOR, Department of Collection of Microorganisms | Oleg V. Pyankov et al   |
| EPI_ISL_428899 | State Research Center of Virology and Biotechnology VECTOR, Department of Collection of Microorganisms                                                                                                         | State Research Center of Virology and Biotechnology VECTOR, Department of Collection of Microorganisms | Sergey A. Bodnev et al  |
| EPI_ISL_428920 | State Research Center of Virology and Biotechnology VECTOR, Department of Collection of Microorganisms                                                                                                         | State Research Center of Virology and Biotechnology VECTOR, Department of Collection of Microorganisms | Sergey A. Bodnev et al  |
| EPI_ISL_428911 | State Research Center of Virology and Biotechnology VECTOR, Department of Collection of Microorganisms                                                                                                         | State Research Center of Virology and Biotechnology VECTOR, Department of Collection of Microorganisms | Oleg V. Pyankov et al   |
| EPI_ISL_602414 | WHO National Influenza Centre Russian Federation                                                                                                                                                               | WHO National Influenza Centre Russian Federation                                                       | Andrey Komissarov et al |
| EPI_ISL_610227 | Molecular diagnostic laboratory of Federal Budget Institution of Science "Central Research Institute of Epidemiology" of The Federal Service on Customers' Rights Protection and Human Well-being Surveillance | Group of Genomics and Postgenomic Technologies of Central Research Institute of Epidemiology           | Samoilov AE et al       |
| EPI_ISL_534338 | Molecular diagnostic laboratory of Federal Budget Institution of Science "Central Research Institute of Epidemiology" of The Federal Service on Customers' Rights Protection and Human Well-being Surveillance | Group of Genomics and Postgenomic Technologies of Central Research Institute of Epidemiology           | Speranskaya AS et al    |
| EPI_ISL_610232 | Molecular diagnostic laboratory of Federal Budget Institution of Science "Central Research Institute of Epidemiology" of The Federal Service on Customers' Rights Protection and Human Well-being Surveillance | Group of Genomics and Postgenomic Technologies of Central Research Institute of Epidemiology           | Samoilov AE et al       |
| EPI_ISL_872907 | WHO National Influenza Centre Russian Federation                                                                                                                                                               | WHO National Influenza Centre Russian Federation                                                       | Andrey Komissarov et al |
| EPI_ISL_872929 | WHO National Influenza Centre Russian Federation                                                                                                                                                               | WHO National Influenza Centre Russian Federation                                                       | Andrey Komissarov et al |
| EPI_ISL_872936 | WHO National Influenza Centre Russian Federation                                                                                                                                                               | WHO National Influenza Centre Russian Federation                                                       | Andrey Komissarov et al |
| EPI_ISL_872938 | WHO National Influenza Centre Russian Federation                                                                                                                                                               | WHO National Influenza Centre Russian Federation                                                       | Andrey Komissarov et al |
| EPI_ISL_602456 | HELIX LLC                                                                                                                                                                                                      | WHO National Influenza Centre Russian Federation                                                       | Andrey Komissarov et al |
| EPI_ISL_872951 | WHO National Influenza Centre Russian Federation                                                                                                                                                               | WHO National Influenza Centre Russian Federation                                                       | Andrey Komissarov et al |
| EPI_ISL_733120 | HELIX LLC                                                                                                                                                                                                      | WHO National Influenza Centre Russian Federation                                                       | Andrey Komissarov et al |
| EPI_ISL_733252 | WHO National Influenza Centre Russian Federation                                                                                                                                                               | WHO National Influenza Centre Russian Federation                                                       | Andrey Komissarov et al |
| EPI_ISL_733300 | WHO National Influenza Centre Russian Federation                                                                                                                                                               | WHO National Influenza Centre Russian Federation                                                       | Andrey Komissarov et al |
| EPI_ISL_770633 | WHO National Influenza Centre Russian Federation                                                                                                                                                               | WHO National Influenza Centre Russian Federation                                                       | Andrey Komissarov et al |
| EPI_ISL_770674 | WHO National Influenza Centre Russian Federation                                                                                                                                                               | WHO National Influenza Centre Russian Federation                                                       | Andrey Komissarov et al |
| EPI_ISL_428910 | State Research Center of Virology and Biotechnology VECTOR, Department of Collection of Microorganisms                                                                                                         | State Research Center of Virology and Biotechnology VECTOR, Department of Collection of Microorganisms | Oleg V. Pyankov et al   |
| EPI_ISL_872990 | HELIX LLC                                                                                                                                                                                                      | WHO National Influenza Centre Russian Federation                                                       | Andrey Komissarov et al |
| EPI_ISL_873013 | HELIX LLC                                                                                                                                                                                                      | WHO National Influenza Centre Russian Federation                                                       | Andrey Komissarov et al |
| EPI_ISL_873018 | HELIX LLC                                                                                                                                                                                                      | WHO National Influenza Centre Russian Federation                                                       | Andrey Komissarov et al |

|                |                                                                                                                                                                                                                |                                                                                                        |                         |
|----------------|----------------------------------------------------------------------------------------------------------------------------------------------------------------------------------------------------------------|--------------------------------------------------------------------------------------------------------|-------------------------|
| EPI_ISL_754210 | Molecular diagnostic laboratory of Federal Budget Institution of Science "Central Research Institute of Epidemiology" of The Federal Service on Customers' Rights Protection and Human Well-being Surveillance | Group of Genomics and Postgenomic Technologies of Central Research Institute of Epidemiology           | Samoilov AE et al       |
| EPI_ISL_984630 | Laboratory of Virology of Federal Budget Health Care Institution "Center of Hygiene and Epidemiology in Arkhangelsk region"                                                                                    | Group of Genomics and Postgenomic Technologies of Central Research Institute of Epidemiology           | Samoilov AE et al       |
| EPI_ISL_602459 | HELIX LLC                                                                                                                                                                                                      | WHO National Influenza Centre Russian Federation                                                       | Andrey Komissarov et al |
| EPI_ISL_596323 | Pathogenic Microorganisms Variability Laboratory                                                                                                                                                               | WHO National Influenza Centre Russian Federation                                                       | Andrey Komissarov et al |
| EPI_ISL_596342 | Pathogenic Microorganisms Variability Laboratory                                                                                                                                                               | WHO National Influenza Centre Russian Federation                                                       | Andrey Komissarov et al |
| EPI_ISL_596343 | Pathogenic Microorganisms Variability Laboratory                                                                                                                                                               | WHO National Influenza Centre Russian Federation                                                       | Andrey Komissarov et al |
| EPI_ISL_596345 | Pathogenic Microorganisms Variability Laboratory                                                                                                                                                               | WHO National Influenza Centre Russian Federation                                                       | Andrey Komissarov et al |
| EPI_ISL_733049 | HELIX LLC                                                                                                                                                                                                      | WHO National Influenza Centre Russian Federation                                                       | Andrey Komissarov et al |
| EPI_ISL_733052 | HELIX LLC                                                                                                                                                                                                      | WHO National Influenza Centre Russian Federation                                                       | Andrey Komissarov et al |
| EPI_ISL_733054 | HELIX LLC                                                                                                                                                                                                      | WHO National Influenza Centre Russian Federation                                                       | Andrey Komissarov et al |
| EPI_ISL_733072 | HELIX LLC                                                                                                                                                                                                      | WHO National Influenza Centre Russian Federation                                                       | Andrey Komissarov et al |
| EPI_ISL_733132 | HELIX LLC                                                                                                                                                                                                      | WHO National Influenza Centre Russian Federation                                                       | Andrey Komissarov et al |
| EPI_ISL_733432 | HELIX LLC                                                                                                                                                                                                      | WHO National Influenza Centre Russian Federation                                                       | Andrey Komissarov et al |
| EPI_ISL_602408 | HELIX LLC                                                                                                                                                                                                      | WHO National Influenza Centre Russian Federation                                                       | Andrey Komissarov et al |
| EPI_ISL_733362 | HELIX LLC                                                                                                                                                                                                      | WHO National Influenza Centre Russian Federation                                                       | Andrey Komissarov et al |
| EPI_ISL_733377 | HELIX LLC                                                                                                                                                                                                      | WHO National Influenza Centre Russian Federation                                                       | Andrey Komissarov et al |
| EPI_ISL_428881 | State Research Center of Virology and Biotechnology VECTOR, Department of Collection of Microorganisms                                                                                                         | State Research Center of Virology and Biotechnology VECTOR, Department of Collection of Microorganisms | Sergey A. Bodnev et al  |
| EPI_ISL_428882 | State Research Center of Virology and Biotechnology VECTOR, Department of Collection of Microorganisms                                                                                                         | State Research Center of Virology and Biotechnology VECTOR, Department of Collection of Microorganisms | Oleg V. Pyankov et al   |
| EPI_ISL_733373 | HELIX LLC                                                                                                                                                                                                      | WHO National Influenza Centre Russian Federation                                                       | Andrey Komissarov et al |
| EPI_ISL_733385 | HELIX LLC                                                                                                                                                                                                      | WHO National Influenza Centre Russian Federation                                                       | Andrey Komissarov et al |
| EPI_ISL_507214 | Department of Experimental Modeling and Pathogenesis of Infectious Diseases                                                                                                                                    | WHO National Influenza Centre Russian Federation                                                       | Andrey Komissarov et al |
| EPI_ISL_569841 | Omsk Research Institute of Natural Focal Infections                                                                                                                                                            | WHO National Influenza Centre Russian Federation                                                       | Artem Fadeev et al      |
| EPI_ISL_569814 | Omsk Research Institute of Natural Focal Infections                                                                                                                                                            | WHO National Influenza Centre Russian Federation                                                       | Artem Fadeev et al      |
| EPI_ISL_569767 | Omsk Research Institute of Natural Focal Infections                                                                                                                                                            | WHO National Influenza Centre Russian Federation                                                       | Artem Fadeev et al      |
| EPI_ISL_569825 | Omsk Research Institute of Natural Focal Infections                                                                                                                                                            | WHO National Influenza Centre Russian Federation                                                       | Artem Fadeev et al      |
| EPI_ISL_569810 | Omsk Research Institute of Natural Focal Infections                                                                                                                                                            | WHO National Influenza Centre Russian Federation                                                       | Artem Fadeev et al      |
| EPI_ISL_569771 | Omsk Research Institute of Natural Focal Infections                                                                                                                                                            | WHO National Influenza Centre Russian Federation                                                       | Artem Fadeev et al      |
| EPI_ISL_569848 | Omsk Research Institute of Natural Focal Infections                                                                                                                                                            | WHO National Influenza Centre Russian Federation                                                       | Artem Fadeev et al      |
| EPI_ISL_569855 | Omsk Research Institute of Natural Focal Infections                                                                                                                                                            | WHO National Influenza Centre Russian Federation                                                       | Artem Fadeev et al      |
| EPI_ISL_639934 | Omsk Research Institute of Natural Focal Infections                                                                                                                                                            | WHO National Influenza Centre Russian Federation                                                       | Artem Fadeev et al      |
| EPI_ISL_569739 | Omsk Research Institute of Natural Focal Infections                                                                                                                                                            | WHO National Influenza Centre Russian Federation                                                       | Artem Fadeev et al      |
| EPI_ISL_639940 | Omsk Research Institute of Natural Focal Infections                                                                                                                                                            | WHO National Influenza Centre Russian Federation                                                       | Artem Fadeev et al      |
| EPI_ISL_569747 | Omsk Research Institute of Natural Focal Infections                                                                                                                                                            | WHO National Influenza Centre Russian Federation                                                       | Artem Fadeev et al      |
| EPI_ISL_596355 | WHO National Influenza Centre Russian Federation                                                                                                                                                               | WHO National Influenza Centre Russian Federation                                                       | Andrey Komissarov et al |
| EPI_ISL_733007 | WHO National Influenza Centre Russian Federation                                                                                                                                                               | WHO National Influenza Centre Russian Federation                                                       | Andrey Komissarov et al |



|                |                                                             |                                                  |                         |
|----------------|-------------------------------------------------------------|--------------------------------------------------|-------------------------|
| EPI_ISL_450253 | WHO National Influenza Centre Russian Federation            | WHO National Influenza Centre Russian Federation | Andrey Komissarov et al |
| EPI_ISL_733133 | HELIX LLC                                                   | WHO National Influenza Centre Russian Federation | Andrey Komissarov et al |
| EPI_ISL_707789 | Rwanda National Reference Laboratory                        | Rwanda National Reference Laboratory             | Enatha Mukantwari et al |
| EPI_ISL_735436 | Nucleic Acid Testing - Rwanda National Reference Laboratory | GIGA Medical Genomics                            | Yvan Butera et al       |
| EPI_ISL_735437 | Nucleic Acid Testing - Rwanda National Reference Laboratory | GIGA Medical Genomics                            | Yvan Butera et al       |
| EPI_ISL_735444 | Nucleic Acid Testing - Rwanda National Reference Laboratory | GIGA Medical Genomics                            | Yvan Butera et al       |
| EPI_ISL_735445 | Rwanda National Reference Laboratory                        | GIGA Medical Genomics                            | Yvan Butera et al       |
| EPI_ISL_735446 | Nucleic Acid Testing - Rwanda National Reference Laboratory | GIGA Medical Genomics                            | Yvan Butera et al       |
| EPI_ISL_735447 | Nucleic Acid Testing - Rwanda National Reference Laboratory | GIGA Medical Genomics                            | Yvan Butera et al       |
| EPI_ISL_735448 | Nucleic Acid Testing - Rwanda National Reference Laboratory | GIGA Medical Genomics                            | Yvan Butera et al       |
| EPI_ISL_925848 | Nucleic Acid Testing, National Reference Laboratory         | GIGA Medical Genomics                            | Yvan Butera et al       |
| EPI_ISL_925849 | Nucleic Acid Testing, National Reference Laboratory         | GIGA Medical Genomics                            | Yvan Butera et al       |
| EPI_ISL_925860 | Nucleic Acid Testing, National Reference Laboratory         | GIGA Medical Genomics                            | Yvan Butera et al       |
| EPI_ISL_925865 | Nucleic Acid Testing, National Reference Laboratory         | GIGA Medical Genomics                            | Yvan Butera et al       |
| EPI_ISL_925883 | Nucleic Acid Testing, National Reference Laboratory         | GIGA Medical Genomics                            | Yvan Butera et al       |
| EPI_ISL_925886 | Nucleic Acid Testing, National Reference Laboratory         | GIGA Medical Genomics                            | Yvan Butera et al       |
| EPI_ISL_925889 | Nucleic Acid Testing, National Reference Laboratory         | GIGA Medical Genomics                            | Yvan Butera et al       |
| EPI_ISL_925894 | Nucleic Acid Testing, National Reference Laboratory         | GIGA Medical Genomics                            | Yvan Butera et al       |
| EPI_ISL_925895 | Nucleic Acid Testing, National Reference Laboratory         | GIGA Medical Genomics                            | Yvan Butera et al       |
| EPI_ISL_925900 | Nucleic Acid Testing, National Reference Laboratory         | GIGA Medical Genomics                            | Yvan Butera et al       |
| EPI_ISL_925901 | Nucleic Acid Testing, National Reference Laboratory         | GIGA Medical Genomics                            | Yvan Butera et al       |
| EPI_ISL_925902 | Nucleic Acid Testing, National Reference Laboratory         | GIGA Medical Genomics                            | Yvan Butera et al       |
| EPI_ISL_925903 | Nucleic Acid Testing, National Reference Laboratory         | GIGA Medical Genomics                            | Yvan Butera et al       |
| EPI_ISL_925904 | Nucleic Acid Testing, National Reference Laboratory         | GIGA Medical Genomics                            | Yvan Butera et al       |
| EPI_ISL_925906 | Nucleic Acid Testing, National Reference Laboratory         | GIGA Medical Genomics                            | Yvan Butera et al       |
| EPI_ISL_925907 | Nucleic Acid Testing, National Reference Laboratory         | GIGA Medical Genomics                            | Yvan Butera et al       |
| EPI_ISL_960228 | Nucleic Acid Testing, National Reference Laboratory         | GIGA Medical Genomics                            | Yvan Butera et al       |
| EPI_ISL_960283 | Nucleic Acid Testing, National Reference Laboratory         | GIGA Medical Genomics                            | Yvan Butera et al       |
| EPI_ISL_960276 | Nucleic Acid Testing, National Reference Laboratory         | GIGA Medical Genomics                            | Yvan Butera et al       |
| EPI_ISL_960265 | Nucleic Acid Testing, National Reference Laboratory         | GIGA Medical Genomics                            | Yvan Butera et al       |
| EPI_ISL_960236 | Nucleic Acid Testing, National Reference Laboratory         | GIGA Medical Genomics                            | Yvan Butera et al       |
| EPI_ISL_960237 | Nucleic Acid Testing, National Reference Laboratory         | GIGA Medical Genomics                            | Yvan Butera et al       |
| EPI_ISL_960302 | Nucleic Acid Testing, National Reference Laboratory         | GIGA Medical Genomics                            | Yvan Butera et al       |
| EPI_ISL_960301 | Nucleic Acid Testing, National Reference Laboratory         | GIGA Medical Genomics                            | Yvan Butera et al       |
| EPI_ISL_960300 | Nucleic Acid Testing, National Reference Laboratory         | GIGA Medical Genomics                            | Yvan Butera et al       |
| EPI_ISL_960294 | Nucleic Acid Testing, National Reference Laboratory         | GIGA Medical Genomics                            | Yvan Butera et al       |
| EPI_ISL_960290 | Nucleic Acid Testing, National Reference Laboratory         | GIGA Medical Genomics                            | Yvan Butera et al       |
| EPI_ISL_613429 | Institut Pasteur de la Guadeloupe                           | Institut Pasteur de la Guadeloupe                | Marion Barbet et al     |
| EPI_ISL_613446 | Institut Pasteur de la Guadeloupe                           | Institut Pasteur de la Guadeloupe                | Marion Barbet et al     |

|                |                                                                                 |                                                                                                                                          |                            |
|----------------|---------------------------------------------------------------------------------|------------------------------------------------------------------------------------------------------------------------------------------|----------------------------|
| EPI_ISL_872193 | Caribbean Public Health Agency                                                  | Carrington Lab, Department of Building 36, First Floor Biochemistry Unit, Faculty of Medical Sciences, The University of the West Indies | Nikita S. D. Sahadeo et al |
| EPI_ISL_872194 | Caribbean Public Health Agency                                                  | Carrington Lab, Department of PreClinical Sciences, Faculty of Medical Sciences, The University of the West Indies                       | Nikita S. D. Sahadeo et al |
| EPI_ISL_872195 | Caribbean Public Health Agency                                                  | Carrington Lab, Department of PreClinical Sciences, Faculty of Medical Sciences, The University of the West Indies                       | Nikita S. D. Sahadeo et al |
| EPI_ISL_872196 | Caribbean Public Health Agency                                                  | Carrington Lab, Department of PreClinical Sciences, Faculty of Medical Sciences, The University of the West Indies                       | Nikita S. D. Sahadeo et al |
| EPI_ISL_977581 | Caribbean Public Health Agency                                                  | Carrington Lab, Department of PreClinical Sciences                                                                                       | Nikita S. D. Sahadeo et al |
| EPI_ISL_977583 | Caribbean Public Health Agency                                                  | Carrington Lab, Department of PreClinical Sciences                                                                                       | Nikita S. D. Sahadeo et al |
| EPI_ISL_977584 | Caribbean Public Health Agency                                                  | Carrington Lab, Department of PreClinical Sciences                                                                                       | Nikita S. D. Sahadeo et al |
| EPI_ISL_977594 | Caribbean Public Health Agency                                                  | Carrington Lab, Department of PreClinical Sciences                                                                                       | Nikita S. D. Sahadeo et al |
| EPI_ISL_977538 | Caribbean Public Health Agency                                                  | Carrington Lab, Department of PreClinical Sciences                                                                                       | Nikita S. D. Sahadeo et al |
| EPI_ISL_977539 | Caribbean Public Health Agency                                                  | Carrington Lab, Department of PreClinical Sciences                                                                                       | Nikita S. D. Sahadeo et al |
| EPI_ISL_613447 | Institut Pasteur de la Guadeloupe                                               | Institut Pasteur de la Guadeloupe                                                                                                        | Marion Barbet et al        |
| EPI_ISL_613448 | Institut Pasteur de la Guadeloupe                                               | Institut Pasteur de la Guadeloupe                                                                                                        | Marion Barbet et al        |
| EPI_ISL_613449 | Institut Pasteur de la Guadeloupe                                               | Institut Pasteur de la Guadeloupe                                                                                                        | Marion Barbet et al        |
| EPI_ISL_613450 | Institut Pasteur de la Guadeloupe                                               | Institut Pasteur de la Guadeloupe                                                                                                        | Marion Barbet et al        |
| EPI_ISL_613451 | Institut Pasteur de la Guadeloupe                                               | Institut Pasteur de la Guadeloupe                                                                                                        | Marion Barbet et al        |
| EPI_ISL_613452 | Institut Pasteur de la Guadeloupe                                               | Institut Pasteur de la Guadeloupe                                                                                                        | Marion Barbet et al        |
| EPI_ISL_613453 | Institut Pasteur de la Guadeloupe                                               | Institut Pasteur de la Guadeloupe                                                                                                        | Marion Barbet et al        |
| EPI_ISL_613454 | Institut Pasteur de la Guadeloupe                                               | Institut Pasteur de la Guadeloupe                                                                                                        | Marion Barbet et al        |
| EPI_ISL_613455 | Institut Pasteur de la Guadeloupe                                               | Institut Pasteur de la Guadeloupe                                                                                                        | Marion Barbet et al        |
| EPI_ISL_613456 | Institut Pasteur de la Guadeloupe                                               | Institut Pasteur de la Guadeloupe                                                                                                        | Marion Barbet et al        |
| EPI_ISL_489997 | King Fahad Medical City                                                         | King Fahad Medical City                                                                                                                  | Alosaimi et al             |
| EPI_ISL_489998 | King Fahad Medical City                                                         | King Fahad Medical City                                                                                                                  | Alosaimi et al             |
| EPI_ISL_490001 | King Fahad Medical City                                                         | King Fahad Medical City                                                                                                                  | Alosaimi et al             |
| EPI_ISL_490005 | King Fahad Medical City                                                         | King Fahad Medical City                                                                                                                  | Alosaimi et al             |
| EPI_ISL_490006 | King Fahad Medical City                                                         | King Fahad Medical City                                                                                                                  | Alosaimi et al             |
| EPI_ISL_490007 | King Fahad Medical City                                                         | King Fahad Medical City                                                                                                                  | Alosaimi et al             |
| EPI_ISL_490008 | King Fahad Medical City                                                         | King Fahad Medical City                                                                                                                  | Alosaimi et al             |
| EPI_ISL_490009 | King Fahad Medical City                                                         | King Fahad Medical City                                                                                                                  | Alosaimi et al             |
| EPI_ISL_490010 | King Fahad Medical City                                                         | King Fahad Medical City                                                                                                                  | Alosaimi et al             |
| EPI_ISL_490011 | King Fahad Medical City                                                         | King Fahad Medical City                                                                                                                  | Alosaimi et al             |
| EPI_ISL_507027 | unknown                                                                         | Infectious Diseases Research, King Abdullah International Medical Research Center (KAIMRC)                                               | Alghoribi et al            |
| EPI_ISL_512890 | Pathogen Genomics Lab King Abdullah University of Science and Technology(KAUST) | Pathogen Genomics Lab King Abdullah University of Science and Technology(KAUST)                                                          | Raece Naeem et al          |
| EPI_ISL_512898 | Pathogen Genomics Lab King Abdullah University of Science and Technology(KAUST) | Pathogen Genomics Lab King Abdullah University of Science and Technology(KAUST)                                                          | Raece Naeem et al          |
| EPI_ISL_636966 | Pathogen Genomics Lab King Abdullah University of Science and Technology(KAUST) | Pathogen Genomics Lab King Abdullah University of Science and Technology(KAUST)                                                          | Fathia Ben Rached et al    |
| EPI_ISL_677911 | Pathogen Genomics Lab King Abdullah University of Science and Technology(KAUST) | Pathogen Genomics Lab King Abdullah University of Science and Technology(KAUST)                                                          | Muhammad Shuaib et al      |



|                |                                                                                                                                                                                                 |                                                                                 |                            |
|----------------|-------------------------------------------------------------------------------------------------------------------------------------------------------------------------------------------------|---------------------------------------------------------------------------------|----------------------------|
| EPI_ISL_513203 | Pathogen Genomics Lab King Abdullah University of Science and Technology(KAUST)                                                                                                                 | Pathogen Genomics Lab King Abdullah University of Science and Technology(KAUST) | Rahul P Salunke et al      |
| EPI_ISL_678049 | Pathogen Genomics Lab King Abdullah University of Science and Technology(KAUST)                                                                                                                 | Pathogen Genomics Lab King Abdullah University of Science and Technology(KAUST) | Muhammad Shuaib et al      |
| EPI_ISL_678095 | Pathogen Genomics Lab King Abdullah University of Science and Technology(KAUST)                                                                                                                 | Pathogen Genomics Lab King Abdullah University of Science and Technology(KAUST) | Olga Douvropoulou et al    |
| EPI_ISL_678101 | Pathogen Genomics Lab King Abdullah University of Science and Technology(KAUST)                                                                                                                 | Pathogen Genomics Lab King Abdullah University of Science and Technology(KAUST) | Amanda Ooi et al           |
| EPI_ISL_678231 | Pathogen Genomics Lab King Abdullah University of Science and Technology(KAUST)                                                                                                                 | Pathogen Genomics Lab King Abdullah University of Science and Technology(KAUST) | Amit Kumar Subudhi et al   |
| EPI_ISL_678137 | Pathogen Genomics Lab King Abdullah University of Science and Technology(KAUST)                                                                                                                 | Pathogen Genomics Lab King Abdullah University of Science and Technology(KAUST) | Sharif Hala et al          |
| EPI_ISL_437491 | Pathogen Genomics Lab King Abdullah University of Science and Technology(KAUST)                                                                                                                 | Pathogen Genomics Lab King Abdullah University of Science and Technology(KAUST) | Sara Mfarrej et al         |
| EPI_ISL_437463 | Pathogen Genomics Lab King Abdullah University of Science and Technology(KAUST)                                                                                                                 | Pathogen Genomics Lab King Abdullah University of Science and Technology(KAUST) | Sharif Hala et al          |
| EPI_ISL_437697 | Pathogen Genomics Lab King Abdullah University of Science and Technology(KAUST)                                                                                                                 | Pathogen Genomics Lab King Abdullah University of Science and Technology(KAUST) | Sharif Hala et al          |
| EPI_ISL_437468 | Pathogen Genomics Lab King Abdullah University of Science and Technology(KAUST)                                                                                                                 | Pathogen Genomics Lab King Abdullah University of Science and Technology(KAUST) | Sharif Hala et al          |
| EPI_ISL_678244 | Pathogen Genomics Lab King Abdullah University of Science and Technology(KAUST)                                                                                                                 | Pathogen Genomics Lab King Abdullah University of Science and Technology(KAUST) | Sara Mfarrej et al         |
| EPI_ISL_678238 | Pathogen Genomics Lab King Abdullah University of Science and Technology(KAUST)                                                                                                                 | Pathogen Genomics Lab King Abdullah University of Science and Technology(KAUST) | Muhammad Shuaib et al      |
| EPI_ISL_678174 | Pathogen Genomics Lab King Abdullah University of Science and Technology(KAUST)                                                                                                                 | Pathogen Genomics Lab King Abdullah University of Science and Technology(KAUST) | Muhammad Shuaib et al      |
| EPI_ISL_678239 | Pathogen Genomics Lab King Abdullah University of Science and Technology(KAUST)                                                                                                                 | Pathogen Genomics Lab King Abdullah University of Science and Technology(KAUST) | Muhammad Shuaib et al      |
| EPI_ISL_678220 | Pathogen Genomics Lab King Abdullah University of Science and Technology(KAUST)                                                                                                                 | Pathogen Genomics Lab King Abdullah University of Science and Technology(KAUST) | Sara Mfarrej et al         |
| EPI_ISL_678185 | Pathogen Genomics Lab King Abdullah University of Science and Technology(KAUST)                                                                                                                 | Pathogen Genomics Lab King Abdullah University of Science and Technology(KAUST) | Sara Mfarrej et al         |
| EPI_ISL_678224 | Pathogen Genomics Lab King Abdullah University of Science and Technology(KAUST)                                                                                                                 | Pathogen Genomics Lab King Abdullah University of Science and Technology(KAUST) | Sara Mfarrej et al         |
| EPI_ISL_448132 | West of Scotland Specialist Virology Centre, NHSGGC / MRC-University of Glasgow Centre for Virus Research                                                                                       | COVID-19 Genomics UK (COG-UK) Consortium                                        | Ana da Silva Filipe et al  |
| EPI_ISL_478249 | Virology Department, Royal Infirmary of Edinburgh, NHS Lothian / School of Biological Sciences, University of Edinburgh / Institute of Genetics and Molecular Medicine, University of Edinburgh | COVID-19 Genomics UK (COG-UK) Consortium                                        | McHugh M et al             |
| EPI_ISL_950825 | Oxford Viromics, NDM, University of Oxford; Oxford University Hospitals; Basingstoke and North Hampshire Hospital                                                                               | COVID-19 Genomics UK (COG-UK) Consortium                                        | Tanya Golubchik et al      |
| EPI_ISL_916514 | Lighthouse Lab in Glasgow                                                                                                                                                                       | Wellcome Sanger Institute for the COVID-19 Genomics UK (COG-UK) Consortium      | Harper VanSteenhouse et al |
| EPI_ISL_858536 | Lighthouse Lab in Glasgow                                                                                                                                                                       | Wellcome Sanger Institute for the COVID-19 Genomics UK (COG-UK) Consortium      | Harper VanSteenhouse et al |
| EPI_ISL_858571 | Lighthouse Lab in Glasgow                                                                                                                                                                       | Wellcome Sanger Institute for the COVID-19 Genomics UK (COG-UK) Consortium      | Harper VanSteenhouse et al |
| EPI_ISL_858520 | Lighthouse Lab in Glasgow                                                                                                                                                                       | Wellcome Sanger Institute for the COVID-19 Genomics UK (COG-UK) Consortium      | Harper VanSteenhouse et al |
| EPI_ISL_858275 | Lighthouse Lab in Glasgow                                                                                                                                                                       | Wellcome Sanger Institute for the COVID-19 Genomics UK (COG-UK) Consortium      | Harper VanSteenhouse et al |





|                |                                                                  |                                                                                                           |                 |
|----------------|------------------------------------------------------------------|-----------------------------------------------------------------------------------------------------------|-----------------|
| EPI_ISL_904005 | Scientific Veterinary Institute Novi Sad                         | Veterinary Specialized Institute "Kraljevo", Serbia                                                       | Vidanovic et al |
| EPI_ISL_904006 | Scientific Veterinary Institute Novi Sad                         | Veterinary Specialized Institute "Kraljevo", Serbia                                                       | Vidanovic et al |
| EPI_ISL_955158 | Institute for Biocides and Medical Ecology                       | Institute of microbiology and Immunology, Faculty of Medicine, University of Belgrade                     | Knezevic et al  |
| EPI_ISL_955159 | Institute for Biocides and Medical Ecology                       | Institute of microbiology and Immunology, Faculty of Medicine, University of Belgrade                     | Knezevic et al  |
| EPI_ISL_955161 | Institute for Biocides and Medical Ecology                       | Institute of microbiology and Immunology, Faculty of Medicine, University of Belgrade                     | Knezevic et al  |
| EPI_ISL_955163 | Institute for Biocides and Medical Ecology                       | Institute of microbiology and Immunology, Faculty of Medicine, University of Belgrade                     | Knezevic et al  |
| EPI_ISL_955164 | Institute for Biocides and Medical Ecology                       | Institute of microbiology and Immunology, Faculty of Medicine, University of Belgrade                     | Knezevic et al  |
| EPI_ISL_955165 | Institute for Biocides and Medical Ecology                       | Institute of microbiology and Immunology, Faculty of Medicine, University of Belgrade                     | Knezevic et al  |
| EPI_ISL_955166 | Institute for Biocides and Medical Ecology                       | Institute of microbiology and Immunology, Faculty of Medicine, University of Belgrade                     | Knezevic et al  |
| EPI_ISL_955168 | Institute for Biocides and Medical Ecology                       | Institute of microbiology and Immunology, Faculty of Medicine, University of Belgrade                     | Knezevic et al  |
| EPI_ISL_955167 | Institute for Biocides and Medical Ecology                       | Institute of microbiology and Immunology, Faculty of Medicine, University of Belgrade                     | Knezevic et al  |
| EPI_ISL_891269 | Institute of Biocides and Medical Ecology, Belgarde, Serbia      | Virology department Institute of microbiology and immunology Faculty of Medicine University of Belgrade   | Banko Ana et al |
| EPI_ISL_891272 | Institute of Biocides and Medical Ecology, Belgarde, Serbia      | Virology department Institute of microbiology and immunology Faculty of Medicine University of Belgrade   | Banko Ana et al |
| EPI_ISL_918411 | Institute of Biocides and Medical Ecology                        | Virology Department Institute of Microbiology and Immunology Faculty of Medicine University of Belgrade   | Banko Ana et al |
| EPI_ISL_904007 | Veterinary Specialized Institute Kraljevo                        | Veterinary Specialized Institute "Kraljevo", Serbia                                                       | Vidanovic et al |
| EPI_ISL_541651 | Laboratory Diagnostic, Veterinary Specialized Institute Kraljevo | Laboratory Diagnostic, Veterinary Specialized Institute Kraljevo                                          | Vidanovic et al |
| EPI_ISL_541658 | Laboratory Diagnostic, Veterinary Specialized Institute Kraljevo | Laboratory Diagnostic, Veterinary Specialized Institute Kraljevo                                          | Vidanovic et al |
| EPI_ISL_541657 | Laboratory Diagnostic, Veterinary Specialized Institute Kraljevo | Laboratory Diagnostic, Veterinary Specialized Institute Kraljevo                                          | Vidanovic et al |
| EPI_ISL_541655 | Laboratory Diagnostic, Veterinary Specialized Institute Kraljevo | Laboratory Diagnostic, Veterinary Specialized Institute Kraljevo                                          | Vidanovic et al |
| EPI_ISL_462437 | unknown                                                          | Laboratory Diagnostic                                                                                     | Vidanovic et al |
| EPI_ISL_661189 | Scientific Veterinary Institute Novi Sad                         | Veterinary Specialized Institute "Kraljevo", Serbia                                                       | Vidanovic et al |
| EPI_ISL_644565 | Veterinary Specialized Institute "Kraljevo", Serbia              | Veterinary Specialized Institute "Kraljevo", Serbia                                                       | Vidanovic et al |
| EPI_ISL_582530 | Veterinary Specialized Institute "Kraljevo", Serbia              | Veterinary Specialized Institute "Kraljevo", Serbia                                                       | Vidanovic et al |
| EPI_ISL_644566 | Veterinary Specialized Institute "Kraljevo", Serbia              | Veterinary Specialized Institute "Kraljevo", Serbia                                                       | Vidanovic et al |
| EPI_ISL_644567 | Veterinary Specialized Institute "Kraljevo", Serbia              | Veterinary Specialized Institute "Kraljevo", Serbia                                                       | Vidanovic et al |
| EPI_ISL_904008 | Veterinary Specialized Institute Kraljevo                        | Veterinary Specialized Institute "Kraljevo", Serbia                                                       | Vidanovic et al |
| EPI_ISL_644571 | Veterinary Specialized Institute "Kraljevo", Serbia              | Veterinary Specialized Institute "Kraljevo", Serbia                                                       | Vidanovic et al |
| EPI_ISL_644575 | Veterinary Specialized Institute "Kraljevo", Serbia              | Veterinary Specialized Institute "Kraljevo", Serbia                                                       | Vidanovic et al |
| EPI_ISL_644577 | Veterinary Specialized Institute "Kraljevo", Serbia              | Veterinary Specialized Institute "Kraljevo", Serbia                                                       | Vidanovic et al |
| EPI_ISL_644578 | Veterinary Specialized Institute "Kraljevo", Serbia              | Veterinary Specialized Institute "Kraljevo", Serbia                                                       | Vidanovic et al |
| EPI_ISL_891267 | Institute of Biocides and Medical Ecology, Belgarde, Serbia      | Virology department Institute of microbiology and immunology Faculty of Medicine University of Belgrade   | Banko Ana et al |
| EPI_ISL_909737 | Institute of Biocides and Medical Ecology, Belgrade, Serbia      | Virology Department, Institute of microbiology and immunology, Faculty of Medicine University of Blegrade | Banko Ana et al |

|                |                                                                  |                                                                                                            |                 |
|----------------|------------------------------------------------------------------|------------------------------------------------------------------------------------------------------------|-----------------|
| EPI_ISL_891271 | Institute of Biocides and Medical Ecology, Belgrade, Serbia      | Virology department Institute of microbiology and immunology<br>Faculty of Medicine University of Belgrade | Banko Ana et al |
| EPI_ISL_904010 | Veterinary Specialized Institute Kraljevo                        | Veterinary Specialized Institute "Kraljevo", Serbia                                                        | Vidanovic et al |
| EPI_ISL_891268 | Institute of Biocides and Medical Ecology, Belgrade, Serbia      | Virology department Institute of microbiology and immunology<br>Faculty of Medicine University of Belgrade | Banko Ana et al |
| EPI_ISL_541649 | Laboratory Diagnostic, Veterinary Specialized Institute Kraljevo | Laboratory Diagnostic, Veterinary Specialized Institute Kraljevo                                           | Vidanovic et al |
| EPI_ISL_541661 | Laboratory Diagnostic, Veterinary Specialized Institute Kraljevo | Laboratory Diagnostic, Veterinary Specialized Institute Kraljevo                                           | Vidanovic et al |
| EPI_ISL_833511 | Veterinary Specialized Institute "Nis"                           | Veterinary Specialized Institute "Kraljevo", Serbia                                                        | Vidanovic et al |
| EPI_ISL_833519 | Veterinary Specialized Institute "Nis"                           | Veterinary Specialized Institute "Kraljevo", Serbia                                                        | Vidanovic et al |
| EPI_ISL_644580 | Veterinary Specialized Institute "Kraljevo", Serbia              | Veterinary Specialized Institute "Kraljevo", Serbia                                                        | Vidanovic et al |
| EPI_ISL_644581 | Veterinary Specialized Institute "Kraljevo", Serbia              | Veterinary Specialized Institute "Kraljevo", Serbia                                                        | Vidanovic et al |
| EPI_ISL_676580 | Scientific Veterinary Institute Novi Sad                         | Veterinary Specialized Institute "Kraljevo", Serbia                                                        | Vidanovic et al |
| EPI_ISL_676578 | Scientific Veterinary Institute Novi Sad                         | Veterinary Specialized Institute "Kraljevo", Serbia                                                        | Vidanovic et al |
| EPI_ISL_676588 | Scientific Veterinary Institute Novi Sad                         | Veterinary Specialized Institute "Kraljevo", Serbia                                                        | Vidanovic et al |
| EPI_ISL_676590 | Scientific Veterinary Institute Novi Sad                         | Veterinary Specialized Institute "Kraljevo", Serbia                                                        | Vidanovic et al |
| EPI_ISL_676591 | Scientific Veterinary Institute Novi Sad                         | Veterinary Specialized Institute "Kraljevo", Serbia                                                        | Vidanovic et al |
| EPI_ISL_676592 | Scientific Veterinary Institute Novi Sad                         | Veterinary Specialized Institute "Kraljevo", Serbia                                                        | Vidanovic et al |
| EPI_ISL_676584 | Scientific Veterinary Institute Novi Sad                         | Veterinary Specialized Institute "Kraljevo", Serbia                                                        | Vidanovic et al |
| EPI_ISL_833572 | Veterinary Specialized Institute "Nis"                           | Scientific Veterinary Institute "Novi Sad"                                                                 | Vidanovic et al |
| EPI_ISL_904009 | Scientific Veterinary Institute Novi Sad                         | Veterinary Specialized Institute "Kraljevo", Serbia                                                        | Vidanovic et al |
| EPI_ISL_904004 | Scientific Veterinary Institute Novi Sad                         | Veterinary Specialized Institute "Kraljevo", Serbia                                                        | Vidanovic et al |
| EPI_ISL_676576 | Scientific Veterinary Institute Novi Sad                         | Veterinary Specialized Institute "Kraljevo", Serbia                                                        | Vidanovic et al |
| EPI_ISL_676594 | Scientific Veterinary Institute Novi Sad                         | Veterinary Specialized Institute "Kraljevo", Serbia                                                        | Vidanovic et al |
| EPI_ISL_676586 | Scientific Veterinary Institute Novi Sad                         | Veterinary Specialized Institute "Kraljevo", Serbia                                                        | Vidanovic et al |
| EPI_ISL_661184 | Scientific Veterinary Institute Novi Sad                         | Veterinary Specialized Institute "Kraljevo", Serbia                                                        | Vidanovic et al |
| EPI_ISL_833520 | Veterinary Specialized Institute "Nis"                           | Veterinary Specialized Institute "Kraljevo", Serbia                                                        | Vidanovic et al |
| EPI_ISL_661193 | Scientific Veterinary Institute Novi Sad                         | Veterinary Specialized Institute "Kraljevo", Serbia                                                        | Vidanovic et al |
| EPI_ISL_678486 | Veterinary Specialized Institute "Sabac", Serbia                 | Veterinary Specialized Institute "Kraljevo", Serbia                                                        | Vidanovic et al |
| EPI_ISL_678489 | Veterinary Specialized Institute "Sabac", Serbia                 | Veterinary Specialized Institute "Kraljevo", Serbia                                                        | Vidanovic et al |
| EPI_ISL_833575 | Veterinary Specialized Institute "Nis"                           | Veterinary Specialized Institute "Sabac", Serbia                                                           | Vidanovic et al |
| EPI_ISL_678491 | Veterinary Specialized Institute "Sabac", Serbia                 | Veterinary Specialized Institute "Kraljevo", Serbia                                                        | Vidanovic et al |
| EPI_ISL_678492 | Veterinary Specialized Institute "Sabac", Serbia                 | Veterinary Specialized Institute "Kraljevo", Serbia                                                        | Vidanovic et al |
| EPI_ISL_678493 | Veterinary Specialized Institute "Sabac", Serbia                 | Veterinary Specialized Institute "Kraljevo", Serbia                                                        | Vidanovic et al |
| EPI_ISL_676596 | Scientific Veterinary Institute Novi Sad                         | Veterinary Specialized Institute "Kraljevo", Serbia                                                        | Vidanovic et al |
| EPI_ISL_904011 | Veterinary Specialized Institute Kraljevo                        | Veterinary Specialized Institute "Kraljevo", Serbia                                                        | Vidanovic et al |
| EPI_ISL_676585 | Scientific Veterinary Institute Novi Sad                         | Veterinary Specialized Institute "Kraljevo", Serbia                                                        | Vidanovic et al |
| EPI_ISL_676589 | Scientific Veterinary Institute Novi Sad                         | Veterinary Specialized Institute "Kraljevo", Serbia                                                        | Vidanovic et al |
| EPI_ISL_661179 | Scientific Veterinary Institute Novi Sad                         | Veterinary Specialized Institute "Kraljevo", Serbia                                                        | Vidanovic et al |
| EPI_ISL_514430 | Laboratory Diagnostic, Veterinary Specialized Institute Kraljevo | Laboratory Diagnostic, Veterinary Specialized Institute Kraljevo                                           | Vidanovic et al |
| EPI_ISL_482744 | Laboratory Diagnostic, Veterinary Specialized Institute Kraljevo | Laboratory Diagnostic, Veterinary Specialized Institute Kraljevo                                           | Vidanovic et al |

|                |                                                                                                                            |                                                                                                                                                                                         |                             |
|----------------|----------------------------------------------------------------------------------------------------------------------------|-----------------------------------------------------------------------------------------------------------------------------------------------------------------------------------------|-----------------------------|
| EPI_ISL_644583 | Veterinary Specialized Institute "Kraljevo", Serbia                                                                        | Veterinary Specialized Institute "Kraljevo", Serbia                                                                                                                                     | Vidanovic et al             |
| EPI_ISL_676587 | Scientific Veterinary Institute Novi Sad                                                                                   | Veterinary Specialized Institute "Kraljevo", Serbia                                                                                                                                     | Vidanovic et al             |
| EPI_ISL_661186 | Scientific Veterinary Institute Novi Sad                                                                                   | Veterinary Specialized Institute "Kraljevo", Serbia                                                                                                                                     | Vidanovic et al             |
| EPI_ISL_416376 | Shanghai Public Health Clinical Center, Shanghai Medical College, Fudan University                                         | National Research Center for Translational Medicine (Shanghai), Ruijin Hospital affiliated to Shanghai Jiao Tong University School of Medicine & Shanghai Public Health Clinical Center | Shengyue Wang et al         |
| EPI_ISL_416404 | Shanghai Public Health Clinical Center, Shanghai Medical College, Fudan University                                         | National Research Center for Translational Medicine (Shanghai), Ruijin Hospital affiliated to Shanghai Jiao Tong University School of Medicine & Shanghai Public Health Clinical Center | Shengyue Wang et al         |
| EPI_ISL_850947 | National Institute for Viral Disease Control and Prevention, China CDC                                                     | National Institute for Viral Disease Control and Prevention, China CDC                                                                                                                  | Xiang Zhao et al            |
| EPI_ISL_661271 | Research platform for Transfusion-transmitted Disease, Institute of Blood Transfusion, Chinese Academy of Medical Sciences | Research platform for Transfusion-transmitted Disease, Institute of Blood Transfusion, Chinese Academy of Medical Sciences                                                              | He et al                    |
| EPI_ISL_451345 | West China Hospital of Sichuan University                                                                                  | State Key Laboratory of Biotherapy of Sichuan University                                                                                                                                | Baowen Du et al             |
| EPI_ISL_512811 | Kenema Government Hospital, Ministry of Health and Sanitation                                                              | Kenema Government Hospital, Ministry of Health and Sanitation                                                                                                                           | Goba et al                  |
| EPI_ISL_512812 | Kenema Government Hospital, Ministry of Health and Sanitation                                                              | Kenema Government Hospital, Ministry of Health and Sanitation                                                                                                                           | Goba et al                  |
| EPI_ISL_512813 | Kenema Government Hospital, Ministry of Health and Sanitation                                                              | Kenema Government Hospital, Ministry of Health and Sanitation                                                                                                                           | Goba et al                  |
| EPI_ISL_512814 | Kenema Government Hospital, Ministry of Health and Sanitation                                                              | Kenema Government Hospital, Ministry of Health and Sanitation                                                                                                                           | Goba et al                  |
| EPI_ISL_512815 | Kenema Government Hospital, Ministry of Health and Sanitation                                                              | Kenema Government Hospital, Ministry of Health and Sanitation                                                                                                                           | Goba et al                  |
| EPI_ISL_512816 | Kenema Government Hospital, Ministry of Health and Sanitation                                                              | Kenema Government Hospital, Ministry of Health and Sanitation                                                                                                                           | Goba et al                  |
| EPI_ISL_512817 | Kenema Government Hospital, Ministry of Health and Sanitation                                                              | Kenema Government Hospital, Ministry of Health and Sanitation                                                                                                                           | Goba et al                  |
| EPI_ISL_512818 | Kenema Government Hospital, Ministry of Health and Sanitation                                                              | Kenema Government Hospital, Ministry of Health and Sanitation                                                                                                                           | Goba et al                  |
| EPI_ISL_512819 | Kenema Government Hospital, Ministry of Health and Sanitation                                                              | Kenema Government Hospital, Ministry of Health and Sanitation                                                                                                                           | Goba et al                  |
| EPI_ISL_512820 | Kenema Government Hospital, Ministry of Health and Sanitation                                                              | Kenema Government Hospital, Ministry of Health and Sanitation                                                                                                                           | Goba et al                  |
| EPI_ISL_512821 | Kenema Government Hospital, Ministry of Health and Sanitation                                                              | Kenema Government Hospital, Ministry of Health and Sanitation                                                                                                                           | Goba et al                  |
| EPI_ISL_406973 | Singapore General Hospital                                                                                                 | National Public Health Laboratory                                                                                                                                                       | Mak et al                   |
| EPI_ISL_574491 | Programme in Emerging Infectious Diseases, Duke-NUS Medical School                                                         | National Public Health Laboratory, National Centre for Infectious Diseases                                                                                                              | Tze Minn Mak et al          |
| EPI_ISL_574498 | National Public Health Laboratory, National Centre for Infectious Diseases                                                 | National Public Health Laboratory, National Centre for Infectious Diseases                                                                                                              | Tze Minn Mak et al          |
| EPI_ISL_583895 | Singapore General Hospital                                                                                                 | Department of Microbiology                                                                                                                                                              | Nurdyana Abdul Rahman et al |
| EPI_ISL_596459 | National Public Health Laboratory, National Centre for Infectious Diseases                                                 | National Public Health Laboratory, National Centre for Infectious Diseases                                                                                                              | Tze Minn Mak et al          |
| EPI_ISL_596463 | National Public Health Laboratory, National Centre for Infectious Diseases                                                 | National Public Health Laboratory, National Centre for Infectious Diseases                                                                                                              | Tze Minn Mak et al          |
| EPI_ISL_596467 | National Public Health Laboratory, National Centre for Infectious Diseases                                                 | National Public Health Laboratory, National Centre for Infectious Diseases                                                                                                              | Tze Minn Mak et al          |
| EPI_ISL_596469 | National Public Health Laboratory, National Centre for Infectious Diseases                                                 | National Public Health Laboratory, National Centre for Infectious Diseases                                                                                                              | Tze Minn Mak et al          |
| EPI_ISL_596482 | National Public Health Laboratory, National Centre for Infectious Diseases                                                 | National Public Health Laboratory, National Centre for Infectious Diseases                                                                                                              | Tze Minn Mak et al          |
| EPI_ISL_596486 | National Public Health Laboratory, National Centre for Infectious Diseases                                                 | National Public Health Laboratory, National Centre for Infectious Diseases                                                                                                              | Tze Minn Mak et al          |
| EPI_ISL_596497 | National Public Health Laboratory, National Centre for Infectious Diseases                                                 | National Public Health Laboratory, National Centre for Infectious Diseases                                                                                                              | Tze Minn Mak et al          |
| EPI_ISL_605818 | National Public Health Laboratory, National Centre for Infectious Diseases                                                 | National Public Health Laboratory, National Centre for Infectious Diseases                                                                                                              | Tze Minn Mak et al          |





|                |                                                                            |                                                                                                |                             |
|----------------|----------------------------------------------------------------------------|------------------------------------------------------------------------------------------------|-----------------------------|
| EPI_ISL_995296 | National Public Health Laboratory, National Centre for Infectious Diseases | National Public Health Laboratory, National Centre for Infectious Diseases                     | Tze Minn Mak et al          |
| EPI_ISL_995300 | National Public Health Laboratory, National Centre for Infectious Diseases | National Public Health Laboratory, National Centre for Infectious Diseases                     | Tze Minn Mak et al          |
| EPI_ISL_995304 | National Public Health Laboratory, National Centre for Infectious Diseases | National Public Health Laboratory, National Centre for Infectious Diseases                     | Tze Minn Mak et al          |
| EPI_ISL_995306 | National Public Health Laboratory, National Centre for Infectious Diseases | National Public Health Laboratory, National Centre for Infectious Diseases                     | Tze Minn Mak et al          |
| EPI_ISL_482678 | Singapore General Hospital                                                 | Department of Microbiology, Programme in Emerging Infectious Diseases, Duke-NUS Medical School | Nurdyana Abdul Rahman et al |
| EPI_ISL_407987 | Singapore General Hospital                                                 | Department of Microbiology, Programme in Emerging Infectious Diseases, Duke-NUS Medical School | Danielle E Anderson et al   |
| EPI_ISL_418993 | National Public Health Laboratory, National Centre for Infectious Diseases | National Public Health Laboratory, National Centre for Infectious Diseases                     | Mak TM et al                |
| EPI_ISL_462357 | National Public Health Laboratory, National Centre for Infectious Diseases | National Public Health Laboratory, National Centre for Infectious Diseases                     | Mak TM et al                |
| EPI_ISL_462366 | National Public Health Laboratory, National Centre for Infectious Diseases | National Public Health Laboratory, National Centre for Infectious Diseases                     | Mak TM et al                |
| EPI_ISL_462368 | National Public Health Laboratory, National Centre for Infectious Diseases | National Public Health Laboratory, National Centre for Infectious Diseases                     | Mak TM et al                |
| EPI_ISL_482679 | Singapore General Hospital                                                 | Department of Microbiology, Programme in Emerging Infectious Diseases, Duke-NUS Medical School | Nurdyana Abdul Rahman et al |
| EPI_ISL_407988 | National Centre for Infectious Diseases                                    | Department of Microbiology, Programme in Emerging Infectious Diseases, Duke-NUS Medical School | Danielle E Anderson et al   |
| EPI_ISL_422428 | National Public Health Laboratory, National Centre for Infectious Diseases | National Public Health Laboratory, National Centre for Infectious Diseases                     | Mak TM et al                |
| EPI_ISL_422429 | National Public Health Laboratory, National Centre for Infectious Diseases | National Public Health Laboratory, National Centre for Infectious Diseases                     | Mak TM et al                |
| EPI_ISL_538435 | Department of Laboratory Medicine, Tan Tock Seng Hospital                  | Department of Laboratory Medicine, Tan Tock Seng Hospital                                      | Chen YYC et al              |
| EPI_ISL_469125 | National Public Health Laboratory, National Centre for Infectious Diseases | National Public Health Laboratory, National Centre for Infectious Diseases                     | Mak TM et al                |
| EPI_ISL_418994 | National Public Health Laboratory, National Centre for Infectious Diseases | National Public Health Laboratory, National Centre for Infectious Diseases                     | Mak TM et al                |
| EPI_ISL_475992 | National Public Health Laboratory, National Centre for Infectious Diseases | National Public Health Laboratory, National Centre for Infectious Diseases                     | Mak TM et al                |
| EPI_ISL_475997 | National Public Health Laboratory, National Centre for Infectious Diseases | National Public Health Laboratory, National Centre for Infectious Diseases                     | Mak TM et al                |
| EPI_ISL_476795 | Department of Laboratory Medicine, Tan Tock Seng Hospital                  | Department of Laboratory Medicine, Tan Tock Seng Hospital                                      | Chen YYC et al              |
| EPI_ISL_477170 | Department of Laboratory, Medicine Tan Tock Seng Hospital                  | Department of Laboratory Medicine Tan Tock Seng Hospital                                       | Chen YYC et al              |
| EPI_ISL_574492 | Programme in Emerging Infectious Diseases, Duke-NUS Medical School         | National Public Health Laboratory, National Centre for Infectious Diseases                     | Tze Minn Mak et al          |
| EPI_ISL_476817 | Department of Laboratory Medicine, Tan Tock Seng Hospital                  | Department of Laboratory Medicine, Tan Tock Seng Hospital                                      | Chen YYC et al              |
| EPI_ISL_428828 | National Public Health Laboratory, National Centre for Infectious Diseases | National Public Health Laboratory, National Centre for Infectious Diseases                     | Mak TM et al                |
| EPI_ISL_833376 | National Public Health Laboratory, National Centre for Infectious Diseases | National Public Health Laboratory, National Centre for Infectious Diseases                     | Tze Minn Mak et al          |
| EPI_ISL_574480 | Programme in Emerging Infectious Diseases, Duke-NUS Medical School         | National Public Health Laboratory, National Centre for Infectious Diseases                     | Tze Minn Mak et al          |
| EPI_ISL_482697 | Singapore General Hospital                                                 | Department of Microbiology                                                                     | Nurdyana Abdul Rahman et al |
| EPI_ISL_833384 | National Public Health Laboratory, National Centre for Infectious Diseases | National Public Health Laboratory, National Centre for Infectious Diseases                     | Tze Minn Mak et al          |
| EPI_ISL_483593 | National Public Health Laboratory, National Centre for Infectious Diseases | National Public Health Laboratory, National Centre for Infectious Diseases                     | Mak TM et al                |

|                |                                                                            |                                                                            |                             |
|----------------|----------------------------------------------------------------------------|----------------------------------------------------------------------------|-----------------------------|
| EPI_ISL_410537 | Singapore General Hospital, Molecular Laboratory, Division of Pathology    | Programme in Emerging Infectious Diseases, Duke-NUS Medical School         | Danielle E Anderson et al   |
| EPI_ISL_490050 | National Public Health Laboratory, National Centre for Infectious Diseases | National Public Health Laboratory, National Centre for Infectious Diseases | Mak TM et al                |
| EPI_ISL_490055 | National Public Health Laboratory, National Centre for Infectious Diseases | National Public Health Laboratory, National Centre for Infectious Diseases | Mak TM et al                |
| EPI_ISL_490057 | National Public Health Laboratory, National Centre for Infectious Diseases | National Public Health Laboratory, National Centre for Infectious Diseases | Mak TM et al                |
| EPI_ISL_490078 | National Public Health Laboratory, National Centre for Infectious Diseases | National Public Health Laboratory, National Centre for Infectious Diseases | Mak TM et al                |
| EPI_ISL_493396 | National Public Health Laboratory, National Centre for Infectious Diseases | National Public Health Laboratory, National Centre for Infectious Diseases | Mak TM et al                |
| EPI_ISL_493404 | National Public Health Laboratory, National Centre for Infectious Diseases | National Public Health Laboratory, National Centre for Infectious Diseases | Mak TM et al                |
| EPI_ISL_498564 | National Public Health Laboratory, National Centre for Infectious Diseases | National Public Health Laboratory, National Centre for Infectious Diseases | Mak TM et al                |
| EPI_ISL_498571 | National Public Health Laboratory, National Centre for Infectious Diseases | National Public Health Laboratory, National Centre for Infectious Diseases | Mak TM et al                |
| EPI_ISL_498573 | National Public Health Laboratory, National Centre for Infectious Diseases | National Public Health Laboratory, National Centre for Infectious Diseases | Mak TM et al                |
| EPI_ISL_498575 | National Public Health Laboratory, National Centre for Infectious Diseases | National Public Health Laboratory, National Centre for Infectious Diseases | Mak TM et al                |
| EPI_ISL_498577 | National Public Health Laboratory, National Centre for Infectious Diseases | National Public Health Laboratory, National Centre for Infectious Diseases | Mak TM et al                |
| EPI_ISL_498578 | National Public Health Laboratory, National Centre for Infectious Diseases | National Public Health Laboratory, National Centre for Infectious Diseases | Mak TM et al                |
| EPI_ISL_498582 | National Public Health Laboratory, National Centre for Infectious Diseases | National Public Health Laboratory, National Centre for Infectious Diseases | Mak TM et al                |
| EPI_ISL_498585 | National Public Health Laboratory, National Centre for Infectious Diseases | National Public Health Laboratory, National Centre for Infectious Diseases | Mak TM et al                |
| EPI_ISL_498589 | National Public Health Laboratory, National Centre for Infectious Diseases | National Public Health Laboratory, National Centre for Infectious Diseases | Mak TM et al                |
| EPI_ISL_498596 | National Public Health Laboratory, National Centre for Infectious Diseases | National Public Health Laboratory, National Centre for Infectious Diseases | Mak TM et al                |
| EPI_ISL_482680 | Singapore General Hospital                                                 | Department of Microbiology                                                 | Nurdyana Abdul Rahman et al |
| EPI_ISL_410713 | National Public Health Laboratory, National Centre for Infectious Diseases | National Public Health Laboratory, National Centre for Infectious Diseases | Octavia S et al             |
| EPI_ISL_500561 | Singapore General Hospital                                                 | Department of Microbiology                                                 | Nurdyana Abdul Rahman et al |
| EPI_ISL_507004 | Department of Laboratory Medicine, Tan Tock Seng Hospital                  | Department of Laboratory Medicine, Tan Tock Seng Hospital                  | Chen YYC et al              |
| EPI_ISL_512831 | National Public Health Laboratory, National Centre for Infectious Diseases | National Public Health Laboratory, National Centre for Infectious Diseases | Mak TM et al                |
| EPI_ISL_862821 | National Public Health Laboratory, National Centre for Infectious Diseases | National Public Health Laboratory, National Centre for Infectious Diseases | Tze Minn Mak et al          |
| EPI_ISL_862819 | National Public Health Laboratory, National Centre for Infectious Diseases | National Public Health Laboratory, National Centre for Infectious Diseases | Tze Minn Mak et al          |
| EPI_ISL_516810 | National Public Health Laboratory, National Centre for Infectious Diseases | National Public Health Laboratory, National Centre for Infectious Diseases | Mak TM et al                |
| EPI_ISL_516813 | National Public Health Laboratory, National Centre for Infectious Diseases | National Public Health Laboratory, National Centre for Infectious Diseases | Mak TM et al                |
| EPI_ISL_516814 | National Public Health Laboratory, National Centre for Infectious Diseases | National Public Health Laboratory, National Centre for Infectious Diseases | Mak TM et al                |















|                |                                                                                          |                                                        |                   |
|----------------|------------------------------------------------------------------------------------------|--------------------------------------------------------|-------------------|
| EPI_ISL_678588 | Netcare                                                                                  | KRISP, KZN Research Innovation and Sequencing Platform | Giandhari J et al |
| EPI_ISL_509330 | NHLS-IALCH                                                                               | KRISP, KZN Research Innovation and Sequencing Platform | Giandhari J et al |
| EPI_ISL_509360 | NHLS-IALCH                                                                               | KRISP, KZN Research Innovation and Sequencing Platform | Giandhari J et al |
| EPI_ISL_515863 | Medical Disagnostics Services (MDS)                                                      | KRISP, KZN Research Innovation and Sequencing Platform | Giandhari J et al |
| EPI_ISL_515611 | NHLS-IALCH                                                                               | KRISP, KZN Research Innovation and Sequencing Platform | Giandhari J et al |
| EPI_ISL_515774 | NHLS-IALCH                                                                               | KRISP, KZN Research Innovation and Sequencing Platform | Giandhari J et al |
| EPI_ISL_515780 | NHLS-IALCH                                                                               | KRISP, KZN Research Innovation and Sequencing Platform | Giandhari J et al |
| EPI_ISL_535444 | NHLS-IALCH                                                                               | KRISP, KZN Research Innovation and Sequencing Platform | Giandhari J et al |
| EPI_ISL_535461 | NHLS-IALCH                                                                               | KRISP, KZN Research Innovation and Sequencing Platform | Giandhari J et al |
| EPI_ISL_529732 | NHLS-IALCH                                                                               | KRISP, KZN Research Innovation and Sequencing Platform | Giandhari J et al |
| EPI_ISL_529761 | NHLS-IALCH                                                                               | KRISP, KZN Research Innovation and Sequencing Platform | Giandhari J et al |
| EPI_ISL_529788 | NHLS-IALCH                                                                               | KRISP, KZN Research Innovation and Sequencing Platform | Giandhari J et al |
| EPI_ISL_602659 | NHLS-IALCH                                                                               | KRISP, KZN Research Innovation and Sequencing Platform | Giandhari J et al |
| EPI_ISL_602668 | NHLS-IALCH                                                                               | KRISP, KZN Research Innovation and Sequencing Platform | Giandhari J et al |
| EPI_ISL_602669 | NHLS-IALCH                                                                               | KRISP, KZN Research Innovation and Sequencing Platform | Giandhari J et al |
| EPI_ISL_602716 | NHLS-IALCH                                                                               | KRISP, KZN Research Innovation and Sequencing Platform | Giandhari J et al |
| EPI_ISL_602717 | NHLS-IALCH                                                                               | KRISP, KZN Research Innovation and Sequencing Platform | Giandhari J et al |
| EPI_ISL_602720 | NHLS-IALCH                                                                               | KRISP, KZN Research Innovation and Sequencing Platform | Giandhari J et al |
| EPI_ISL_602788 | NHLS-IALCH                                                                               | KRISP, KZN Research Innovation and Sequencing Platform | Giandhari J et al |
| EPI_ISL_602799 | NHLS-IALCH                                                                               | KRISP, KZN Research Innovation and Sequencing Platform | Giandhari J et al |
| EPI_ISL_602811 | NHLS-IALCH                                                                               | KRISP, KZN Research Innovation and Sequencing Platform | Giandhari J et al |
| EPI_ISL_602820 | NHLS-IALCH                                                                               | KRISP, KZN Research Innovation and Sequencing Platform | Giandhari J et al |
| EPI_ISL_602832 | NHLS-IALCH                                                                               | KRISP, KZN Research Innovation and Sequencing Platform | Giandhari J et al |
| EPI_ISL_602833 | NHLS-IALCH                                                                               | KRISP, KZN Research Innovation and Sequencing Platform | Giandhari J et al |
| EPI_ISL_602863 | NHLS-IALCH                                                                               | KRISP, KZN Research Innovation and Sequencing Platform | Giandhari J et al |
| EPI_ISL_602624 | AHRI-Sigal                                                                               | KRISP, KZN Research Innovation and Sequencing Platform | Gazy I et al      |
| EPI_ISL_602625 | AHRI-Sigal                                                                               | KRISP, KZN Research Innovation and Sequencing Platform | Gazy I et al      |
| EPI_ISL_602882 | NHLS-IALCH                                                                               | KRISP, KZN Research Innovation and Sequencing Platform | Giandhari J et al |
| EPI_ISL_602902 | NHLS-IALCH                                                                               | KRISP, KZN Research Innovation and Sequencing Platform | Giandhari J et al |
| EPI_ISL_635020 | National Health Laboratory Service - Inkosi Albert Luthuli Central Hospital (NHLS-IALCH) | KRISP, KZN Research Innovation and Sequencing Platform | Giandhari J et al |
| EPI_ISL_635031 | National Health Laboratory Service - Inkosi Albert Luthuli Central Hospital (NHLS-IALCH) | KRISP, KZN Research Innovation and Sequencing Platform | Giandhari J et al |
| EPI_ISL_635041 | National Health Laboratory Service - Inkosi Albert Luthuli Central Hospital (NHLS-IALCH) | KRISP, KZN Research Innovation and Sequencing Platform | Giandhari J et al |
| EPI_ISL_660215 | NHLS-IALCH                                                                               | KRISP, KZN Research Innovation and Sequencing Platform | Giandhari J et al |
| EPI_ISL_660236 | NHLS-IALCH                                                                               | KRISP, KZN Research Innovation and Sequencing Platform | Giandhari J et al |
| EPI_ISL_660623 | NHLS-IALCH                                                                               | KRISP, KZN Research Innovation and Sequencing Platform | Giandhari J et al |
| EPI_ISL_660634 | NHLS-IALCH                                                                               | KRISP, KZN Research Innovation and Sequencing Platform | Giandhari J et al |
| EPI_ISL_660642 | NHLS-IALCH                                                                               | KRISP, KZN Research Innovation and Sequencing Platform | Giandhari J et al |
| EPI_ISL_660645 | NHLS-IALCH                                                                               | KRISP, KZN Research Innovation and Sequencing Platform | Giandhari J et al |

|                |                                                                                                          |                                                                                        |                         |
|----------------|----------------------------------------------------------------------------------------------------------|----------------------------------------------------------------------------------------|-------------------------|
| EPI_ISL_660650 | NHLS-IALCH                                                                                               | KRISP, KZN Research Innovation and Sequencing Platform                                 | Giandhari J et al       |
| EPI_ISL_660651 | NHLS-IALCH                                                                                               | KRISP, KZN Research Innovation and Sequencing Platform                                 | Giandhari J et al       |
| EPI_ISL_660259 | Molecular Diagnostic Services (MDS)                                                                      | KRISP, KZN Research Innovation and Sequencing Platform                                 | Giandhari J et al       |
| EPI_ISL_678613 | NHLS-IALCH                                                                                               | KRISP, KZN Research Innovation and Sequencing Platform                                 | Giandhari J et al       |
| EPI_ISL_678614 | NHLS-IALCH                                                                                               | KRISP, KZN Research Innovation and Sequencing Platform                                 | Giandhari J et al       |
| EPI_ISL_678622 | NHLS-IALCH                                                                                               | KRISP, KZN Research Innovation and Sequencing Platform                                 | Giandhari J et al       |
| EPI_ISL_860587 | NHLS-IALCH                                                                                               | KRISP, KZN Research Innovation and Sequencing Platform                                 | Giandhari J et al       |
| EPI_ISL_944125 | National Health Laboratory Service, South Africa                                                         | KRISP, KZN Research Innovation and Sequencing Platform                                 | Laguda-Akingba O et al  |
| EPI_ISL_944156 | National Health Laboratory Service, South Africa                                                         | KRISP, KZN Research Innovation and Sequencing Platform                                 | Laguda-Akingba O et al  |
| EPI_ISL_944168 | National Health Laboratory Service, South Africa                                                         | KRISP, KZN Research Innovation and Sequencing Platform                                 | Laguda-Akingba O et al  |
| EPI_ISL_700567 | Dr Abdurahman CDC wc DAC                                                                                 | NHLS/UCT                                                                               | Arash Iranzadeh et al   |
| EPI_ISL_700512 | Guguletu CHC wc GDH                                                                                      | NHLS/UCT                                                                               | Arash Iranzadeh et al   |
| EPI_ISL_700508 | Heideveld CDC wc HVP                                                                                     | NHLS/UCT                                                                               | Arash Iranzadeh et al   |
| EPI_ISL_700582 | Dr Abdurahman CDC wc DAC                                                                                 | NHLS/UCT                                                                               | Arash Iranzadeh et al   |
| EPI_ISL_700584 | Heideveld Emergency Centre                                                                               | NHLS/UCT                                                                               | Arash Iranzadeh et al   |
| EPI_ISL_700566 | Hanover Park CHC wc HPH                                                                                  | NHLS/UCT                                                                               | Arash Iranzadeh et al   |
| EPI_ISL_700462 | Vanguard CHC wc VGC                                                                                      | NHLS/UCT                                                                               | Arash Iranzadeh et al   |
| EPI_ISL_700592 | Dr Abdurahman CDC wc DAC                                                                                 | NHLS/UCT                                                                               | Arash Iranzadeh et al   |
| EPI_ISL_640060 | Groote Schuur Hospital wc GSH                                                                            | NHLS/UCT                                                                               | Arash Iranzadeh et al   |
| EPI_ISL_640040 | Groote Schuur Hospital wc GSH                                                                            | NHLS/UCT                                                                               | Arash Iranzadeh et al   |
| EPI_ISL_640044 | District 6 CDC wc DSI                                                                                    | NHLS/UCT                                                                               | Arash Iranzadeh et al   |
| EPI_ISL_700537 | Kwanokuthula CDC wc KWA                                                                                  | NHLS/UCT                                                                               | Arash Iranzadeh et al   |
| EPI_ISL_700416 | Zoar Clinic wc ZOA                                                                                       | NHLS/UCT                                                                               | Arash Iranzadeh et al   |
| EPI_ISL_700528 | Plettenberg Bay Clinic wc PLC                                                                            | NHLS/UCT                                                                               | Arash Iranzadeh et al   |
| EPI_ISL_700495 | Kwanokuthula CDC wc KWA                                                                                  | NHLS/UCT                                                                               | Arash Iranzadeh et al   |
| EPI_ISL_640080 | Mfuleni CDC wc MFU                                                                                       | NHLS/UCT                                                                               | Arash Iranzadeh et al   |
| EPI_ISL_700480 | Hanover Park CHC wc HPH                                                                                  | NHLS/UCT                                                                               | Arash Iranzadeh et al   |
| EPI_ISL_430297 | National Institute for Communicable Diseases of the National Health Laboratory Service                   | National Institute for Communicable Diseases of the National Health Laboratory Service | Allam M et al           |
| EPI_ISL_470879 | National Institute for Communicable Diseases of the National Health Laboratory Service                   | National Institute for Communicable Diseases of the National Health Laboratory Service | Allam M et al           |
| EPI_ISL_622931 | National Institute for Communicable Diseases of the National Health Laboratory Service                   | National Institute for Communicable Diseases of the National Health Laboratory Service | Allam M et al           |
| EPI_ISL_940140 | National Institute for Communicable Diseases, National Health Laboratory Services, Gauteng, South Africa | National Institute for Communicable Diseases of the National Health Laboratory Service | Amoako DG et al         |
| EPI_ISL_745187 | Port Nolloth Hospital                                                                                    | National Health Laboratory Service (NHLS), Tygerberg                                   | Susan Engelbrecht et al |
| EPI_ISL_745162 | Elsies River CHC wc ERP                                                                                  | National Health Laboratory Service (NHLS), Tygerberg                                   | Susan Engelbrecht et al |
| EPI_ISL_745168 | Bishop Lavis CDC wc BLP                                                                                  | National Health Laboratory Service (NHLS), Tygerberg                                   | Susan Engelbrecht et al |
| EPI_ISL_745140 | Tygerberg Hospital wc TBH                                                                                | National Health Laboratory Service (NHLS), Tygerberg                                   | Susan Engelbrecht et al |
| EPI_ISL_745185 | Tygerberg Hospital wc TBH                                                                                | National Health Laboratory Service (NHLS), Tygerberg                                   | Susan Engelbrecht et al |
| EPI_ISL_912401 | PathCare                                                                                                 | National Health Laboratory Service (NHLS), Tygerberg                                   | Susan Engelbrecht et al |















|                |                                                                                                                                        |                                                                                                                                        |                                                                                                             |
|----------------|----------------------------------------------------------------------------------------------------------------------------------------|----------------------------------------------------------------------------------------------------------------------------------------|-------------------------------------------------------------------------------------------------------------|
| EPI_ISL_995319 | Division of Emerging Infectious Diseases, Bureau of Infectious Diseases Diagnosis Control, Korea Disease Control and Prevention Agency | Division of Emerging Infectious Diseases, Bureau of Infectious Diseases Diagnosis Control, Korea Disease Control and Prevention Agency | Ae Kyung Park et al                                                                                         |
| EPI_ISL_995788 | Division of Emerging Infectious Diseases, Bureau of Infectious Diseases Diagnosis Control, Korea Disease Control and Prevention Agency | Division of Emerging Infectious Diseases, Bureau of Infectious Diseases Diagnosis Control, Korea Disease Control and Prevention Agency | Ae Kyung Park et al                                                                                         |
| EPI_ISL_995793 | Division of Emerging Infectious Diseases, Bureau of Infectious Diseases Diagnosis Control, Korea Disease Control and Prevention Agency | Division of Emerging Infectious Diseases, Bureau of Infectious Diseases Diagnosis Control, Korea Disease Control and Prevention Agency | Ae Kyung Park et al                                                                                         |
| EPI_ISL_995812 | Division of Emerging Infectious Diseases, Bureau of Infectious Diseases Diagnosis Control, Korea Disease Control and Prevention Agency | Division of Emerging Infectious Diseases, Bureau of Infectious Diseases Diagnosis Control, Korea Disease Control and Prevention Agency | Ae Kyung Park et al                                                                                         |
| EPI_ISL_995827 | Division of Emerging Infectious Diseases, Bureau of Infectious Diseases Diagnosis Control, Korea Disease Control and Prevention Agency | Division of Emerging Infectious Diseases, Bureau of Infectious Diseases Diagnosis Control, Korea Disease Control and Prevention Agency | Ae Kyung Park et al                                                                                         |
| EPI_ISL_995830 | Division of Emerging Infectious Diseases, Bureau of Infectious Diseases Diagnosis Control, Korea Disease Control and Prevention Agency | Division of Emerging Infectious Diseases, Bureau of Infectious Diseases Diagnosis Control, Korea Disease Control and Prevention Agency | Ae Kyung Park et al                                                                                         |
| EPI_ISL_995831 | Division of Emerging Infectious Diseases, Bureau of Infectious Diseases Diagnosis Control, Korea Disease Control and Prevention Agency | Division of Emerging Infectious Diseases, Bureau of Infectious Diseases Diagnosis Control, Korea Disease Control and Prevention Agency | Ae Kyung Park et al                                                                                         |
| EPI_ISL_995836 | Division of Emerging Infectious Diseases, Bureau of Infectious Diseases Diagnosis Control, Korea Disease Control and Prevention Agency | Division of Emerging Infectious Diseases, Bureau of Infectious Diseases Diagnosis Control, Korea Disease Control and Prevention Agency | Ae Kyung Park et al                                                                                         |
| EPI_ISL_995837 | Division of Emerging Infectious Diseases, Bureau of Infectious Diseases Diagnosis Control, Korea Disease Control and Prevention Agency | Division of Emerging Infectious Diseases, Bureau of Infectious Diseases Diagnosis Control, Korea Disease Control and Prevention Agency | Ae Kyung Park et al                                                                                         |
| EPI_ISL_485395 | University of Ulsan College of Medicine and Asan Medical Center                                                                        | University of Ulsan College of Medicine and Asan Medical Center                                                                        | Kuenyoul Park et al                                                                                         |
| EPI_ISL_485396 | University of Ulsan College of Medicine and Asan Medical Center                                                                        | University of Ulsan College of Medicine and Asan Medical Center                                                                        | Kuenyoul Park et al                                                                                         |
| EPI_ISL_452436 | Servicio de Microbiología. HRU de Málaga. Servicio Andaluz de Salud.                                                                   | SeqCOVID-SPAIN consortium/IBV(CSIC)                                                                                                    | Inmaculada de Toro Peinado et al                                                                            |
| EPI_ISL_452402 | Servicio de Microbiología. HRU de Málaga. Servicio Andaluz de Salud.                                                                   | SeqCOVID-SPAIN consortium/IBV(CSIC)                                                                                                    | Inmaculada de Toro Peinado et al                                                                            |
| EPI_ISL_452398 | Servicio de Microbiología. HRU de Málaga. Servicio Andaluz de Salud.                                                                   | SeqCOVID-SPAIN consortium/IBV(CSIC)                                                                                                    | Inmaculada de Toro Peinado et al                                                                            |
| EPI_ISL_452371 | Servicio de Microbiología. HRU de Málaga. Servicio Andaluz de Salud                                                                    | SeqCOVID-SPAIN consortium/IBV(CSIC)                                                                                                    | Inmaculada de Toro Peinado et al                                                                            |
| EPI_ISL_474893 | Hospital Universitario Virgen de las Nieves de Granada-SAS                                                                             | SeqCOVID-SPAIN consortium/IBV(CSIC)                                                                                                    | Mrs Mercedes Pérez Ruiz et al.                                                                              |
| EPI_ISL_510044 | Servicio de Microbiología. HRU de Málaga. Servicio Andaluz de Salud                                                                    | SeqCOVID-SPAIN consortium/IBV(CSIC)                                                                                                    | Inmaculada de Toro Peinado.<br>M <sup>ra</sup> Concepción Mediavilla<br>Gradolph. Begoña Palop Borrás et al |
| EPI_ISL_510063 | Servicio de Microbiología. HRU de Málaga. Servicio Andaluz de Salud                                                                    | SeqCOVID-SPAIN consortium/IBV(CSIC)                                                                                                    | Inmaculada de Toro Peinado.<br>M <sup>ra</sup> Concepción Mediavilla<br>Gradolph. Begoña Palop Borrás et al |
| EPI_ISL_538141 | Servicio de Microbiología y Parasitología clínica. UCEIMP. Hospital Universitario Virgen del Rocío/IBIS/CSIC/US                        | SeqCOVID-SPAIN consortium/IBV(CSIC)                                                                                                    | Guillermo Martín Gutiérrez et al                                                                            |
| EPI_ISL_538158 | Servicio de Microbiología y Parasitología clínica. UCEIMP. Hospital Universitario Virgen del Rocío/IBIS/CSIC/US                        | SeqCOVID-SPAIN consortium/IBV(CSIC)                                                                                                    | Guillermo Martín Gutiérrez et al                                                                            |
| EPI_ISL_578188 | Hospital Virgen de las Nieves                                                                                                          | Instituto de Salud Carlos III                                                                                                          | Iglesias-Caballero et al                                                                                    |
| EPI_ISL_578187 | Hospital Virgen de las Nieves                                                                                                          | Instituto de Salud Carlos III                                                                                                          | Iglesias-Caballero et al                                                                                    |
| EPI_ISL_537323 | Universidad de León                                                                                                                    | SeqCOVID-SPAIN consortium/IBV(CSIC)                                                                                                    | Ana Carvajal et al                                                                                          |
| EPI_ISL_862637 | Hospital Nuestra Señora de Sonsoles                                                                                                    | Instituto de Salud Carlos III                                                                                                          | Iglesias-Caballero et al                                                                                    |
| EPI_ISL_862638 | Hospital Nuestra Señora de Sonsoles                                                                                                    | Instituto de Salud Carlos III                                                                                                          | Iglesias-Caballero et al                                                                                    |

|                 |                                                                                                                                                                                            |                                                                                                                         |                                 |
|-----------------|--------------------------------------------------------------------------------------------------------------------------------------------------------------------------------------------|-------------------------------------------------------------------------------------------------------------------------|---------------------------------|
| EPI_ISL_962930  | Hospital Universitario de Gran Canaria Dr. Negrín                                                                                                                                          | SeqCOVID-SPAIN consortium/IBV(CSIC)                                                                                     | M. Carmen Pérez González et al  |
| EPI_ISL_962931  | Hospital Universitario de Gran Canaria Dr. Negrín                                                                                                                                          | SeqCOVID-SPAIN consortium/IBV(CSIC)                                                                                     | M. Carmen Pérez González et al  |
| EPI_ISL_962932  | Hospital Universitario de Gran Canaria Dr. Negrín                                                                                                                                          | SeqCOVID-SPAIN consortium/IBV(CSIC)                                                                                     | M. Carmen Pérez González et al  |
| EPI_ISL_1000974 | Hospital Universitario de Gran Canaria Dr. Negrín                                                                                                                                          | SeqCOVID-SPAIN consortium/IBV(CSIC)                                                                                     | M. Carmen Pérez González et al  |
| EPI_ISL_962942  | Hospital Universitario de Gran Canaria Dr. Negrín                                                                                                                                          | SeqCOVID-SPAIN consortium/IBV(CSIC)                                                                                     | M. Carmen Pérez González et al  |
| EPI_ISL_962965  | Hospital Universitario de Gran Canaria Dr. Negrín                                                                                                                                          | SeqCOVID-SPAIN consortium/IBV(CSIC)                                                                                     | M. Carmen Pérez González et al  |
| EPI_ISL_962970  | Hospital Universitario de Gran Canaria Dr. Negrín                                                                                                                                          | SeqCOVID-SPAIN consortium/IBV(CSIC)                                                                                     | M. Carmen Pérez González et al  |
| EPI_ISL_962973  | Hospital Universitario de Gran Canaria Dr. Negrín                                                                                                                                          | SeqCOVID-SPAIN consortium/IBV(CSIC)                                                                                     | M. Carmen Pérez González et al  |
| EPI_ISL_825335  | Hospital Universitari Vall d'Hebron - Vall d'Hebron Institut de Recerca                                                                                                                    | Hospital Universitari Vall d'Hebron                                                                                     | Cristina Andrés et al           |
| EPI_ISL_819355  | Hospital Universitari Vall d'Hebron - Vall d'Hebron Institut de Recerca                                                                                                                    | Hospital Universitari Vall d'Hebron                                                                                     | Cristina Andrés et al           |
| EPI_ISL_824425  | Hospital Universitari Vall d'Hebron - Vall d'Hebron Institut de Recerca                                                                                                                    | Hospital Universitari Vall d'Hebron                                                                                     | Cristina Andrés et al           |
| EPI_ISL_824446  | Hospital Universitari Vall d'Hebron - Vall d'Hebron Institut de Recerca                                                                                                                    | Hospital Universitari Vall d'Hebron                                                                                     | Cristina Andrés et al           |
| EPI_ISL_824503  | Hospital Universitari Vall d'Hebron - Vall d'Hebron Institut de Recerca                                                                                                                    | Hospital Universitari Vall d'Hebron                                                                                     | Cristina Andrés et al           |
| EPI_ISL_824437  | Hospital Universitari Vall d'Hebron - Vall d'Hebron Institut de Recerca                                                                                                                    | Hospital Universitari Vall d'Hebron                                                                                     | Cristina Andrés et al           |
| EPI_ISL_824442  | Hospital Universitari Vall d'Hebron - Vall d'Hebron Institut de Recerca                                                                                                                    | Hospital Universitari Vall d'Hebron                                                                                     | Cristina Andrés et al           |
| EPI_ISL_444977  | Hospital Universitari Vall d'Hebron - Vall d'Hebron Institut de Recerca                                                                                                                    | Hospital Universitari Vall d'Hebron                                                                                     | Cristina Andrés et al           |
| EPI_ISL_444990  | Hospital Universitari Vall d'Hebron - Vall d'Hebron Institut de Recerca                                                                                                                    | Hospital Universitari Vall d'Hebron                                                                                     | Cristina Andrés et al           |
| EPI_ISL_444985  | Hospital Universitari Vall d'Hebron - Vall d'Hebron Institut de Recerca                                                                                                                    | Hospital Universitari Vall d'Hebron                                                                                     | Cristina Andrés et al           |
| EPI_ISL_510512  | Servicio de Microbiología, Laboratori Clínic Metropolitana Nord. Hospital Universitari Germans Trias i Pujol. Institut d'Investigació en Ciències de la Salut Germans Trias i Pujol (IGTP) | SeqCOVID-SPAIN consortium/IBV(CSIC)                                                                                     | Elisa Martró et al              |
| EPI_ISL_541069  | Hospital de la Santa Creu i Sant Pau. Servicio de Microbiología                                                                                                                            | SeqCOVID-SPAIN consortium/Institute of Biomedicine of Valencia, IBV-CSIC                                                | Ferran Navarro et al            |
| EPI_ISL_802730  | Hospital Clínic de Barcelona                                                                                                                                                               | Instituto de Salud Carlos III                                                                                           | Iglesias-Caballero et al        |
| EPI_ISL_802728  | Hospital Clínic de Barcelona                                                                                                                                                               | Instituto de Salud Carlos III                                                                                           | Iglesias-Caballero et al        |
| EPI_ISL_510327  | Hospital San Pedro de Alcántara (Cáceres)                                                                                                                                                  | SeqCOVID-SPAIN consortium/IBV(CSIC)                                                                                     | Cristina Muñoz Cuevas et al     |
| EPI_ISL_862654  | Hospital San Pedro de Alcántara                                                                                                                                                            | Instituto de Salud Carlos III                                                                                           | Iglesias-Caballero et al        |
| EPI_ISL_871974  | Hospital Infanta Cristina                                                                                                                                                                  | Instituto de Salud Carlos III                                                                                           | Iglesias-Caballero et al        |
| EPI_ISL_541038  | Hospital Clínico Universitario de Santiago de Compostela                                                                                                                                   | SeqCOVID-SPAIN consortium/Institute of Biomedicine of Valencia, IBV-CSIC                                                | José Javier Costa Alcalde et al |
| EPI_ISL_541066  | Hospital Clínico Universitario de Santiago de Compostela                                                                                                                                   | SeqCOVID-SPAIN consortium/Institute of Biomedicine of Valencia, IBV-CSIC                                                | José Javier Costa Alcalde et al |
| EPI_ISL_468337  | Microbiology Service, University Hospital of A Coruna-Biomedical Research Institute                                                                                                        | Genomes & Disease, Center for Research in Molecular Medicine and Chronic Diseases, University of Santiago de Compostela | Kelly Conde et al               |
| EPI_ISL_529983  | Hospital Universitario 12 de Octubre                                                                                                                                                       | Hospital Universitario 12 de Octubre                                                                                    | Raúl Recio et al                |
| EPI_ISL_428680  | Hospital Universitario La Paz                                                                                                                                                              | Hospital Universitario 12 de Octubre                                                                                    | Eliás Dahdouh et al             |
| EPI_ISL_803855  | Hospital General Universitario Gregorio Marañón                                                                                                                                            | Hospital General Universitario Gregorio Marañón                                                                         | Sergio Buenestado Serrano et al |
| EPI_ISL_803856  | Hospital General Universitario Gregorio Marañón                                                                                                                                            | Hospital General Universitario Gregorio Marañón                                                                         | Sergio Buenestado Serrano et al |
| EPI_ISL_803863  | Hospital General Universitario Gregorio Marañón                                                                                                                                            | Hospital General Universitario Gregorio Marañón                                                                         | Sergio Buenestado Serrano et al |
| EPI_ISL_985404  | Hospital General Universitario Gregorio Marañón                                                                                                                                            | Hospital General Universitario Gregorio Marañón                                                                         | Sergio Buenestado Serrano et al |

|                |                                                                                              |                                                 |                                      |
|----------------|----------------------------------------------------------------------------------------------|-------------------------------------------------|--------------------------------------|
| EPI_ISL_985408 | Hospital General Universitario Gregorio Marañón                                              | Hospital General Universitario Gregorio Marañón | Sergio Buenestado Serrano et al      |
| EPI_ISL_985409 | Hospital General Universitario Gregorio Marañón                                              | Hospital General Universitario Gregorio Marañón | Sergio Buenestado Serrano et al      |
| EPI_ISL_530069 | Hospital Universitario La Paz                                                                | Hospital Universitario La Paz                   | Elias Dahdouh et al                  |
| EPI_ISL_530072 | Hospital Universitario La Paz                                                                | Hospital Universitario La Paz                   | María Rodríguez et al                |
| EPI_ISL_530081 | Hospital Universitario La Paz                                                                | Hospital Universitario La Paz                   | María Rodríguez et al                |
| EPI_ISL_530090 | Hospital Universitario La Paz                                                                | Hospital Universitario La Paz                   | María Rodríguez et al                |
| EPI_ISL_417961 | Hospital Universitario 12 de Octubre                                                         | Hospital Universitario La Paz                   | Elias Dahdouh et al                  |
| EPI_ISL_452534 | Clínica Universidad de Navarra. Servicio de Enfermedades Infecciosas y Microbiología clínica | SeqCOVID-SPAIN consortium/IBV(CSIC)             | Mirian Fernández-Alonso et al        |
| EPI_ISL_452529 | Clínica Universidad de Navarra. Servicio de Enfermedades Infecciosas y Microbiología clínica | SeqCOVID-SPAIN consortium/IBV(CSIC)             | Mirian Fernández-Alonso et al        |
| EPI_ISL_467189 | Hospital General Universitario Gregorio Marañón                                              | SeqCOVID-SPAIN consortium/IBV(CSIC)             | Laura Pérez-Lago et al               |
| EPI_ISL_467257 | Hospital General Universitario Gregorio Marañón                                              | SeqCOVID-SPAIN consortium/IBV(CSIC)             | Laura Pérez-Lago et al               |
| EPI_ISL_481099 | Hospital General Universitario Gregorio Marañón                                              | SeqCOVID-SPAIN consortium/IBV(CSIC)             | Laura Pérez-Lago et al               |
| EPI_ISL_779747 | IdISSC/Hospital Clínico San Carlos de Madrid                                                 | SeqCOVID-SPAIN consortium/IBV(CSIC)             | Alberto Delgado-Iribarren et al      |
| EPI_ISL_654369 | Hospital General Universitario Gregorio Marañón                                              | SeqCOVID-SPAIN consortium/IBV(CSIC)             | Darío García de Viedma et al         |
| EPI_ISL_779969 | Hospital General Universitario Gregorio Marañón                                              | SeqCOVID-SPAIN consortium/IBV(CSIC)             | Darío García de Viedma et al         |
| EPI_ISL_780047 | Hospital General Universitario Gregorio Marañón                                              | SeqCOVID-SPAIN consortium/IBV(CSIC)             | Darío García de Viedma et al         |
| EPI_ISL_813997 | Hospital General Universitario Gregorio Marañón                                              | SeqCOVID-SPAIN consortium/IBV(CSIC)             | Darío García de Viedma et al         |
| EPI_ISL_831071 | Hospital Universitario La Paz (Madrid)                                                       | SeqCOVID-SPAIN consortium/IBV(CSIC)             | María Rodríguez-Tejedor et al        |
| EPI_ISL_831093 | Hospital Universitario La Paz (Madrid)                                                       | SeqCOVID-SPAIN consortium/IBV(CSIC)             | María Rodríguez-Tejedor et al        |
| EPI_ISL_853009 | Hospital General Universitario Gregorio Marañón                                              | SeqCOVID-SPAIN consortium/IBV(CSIC)             | Darío García de Viedma et al         |
| EPI_ISL_852976 | Hospital General Universitario Gregorio Marañón                                              | SeqCOVID-SPAIN consortium/IBV(CSIC)             | Darío García de Viedma et al         |
| EPI_ISL_871973 | Hospital Universitario Severo Ochoa                                                          | Instituto de Salud Carlos III                   | Iglesias-Caballero et al             |
| EPI_ISL_539568 | Hospital Comarcal de Melilla                                                                 | Instituto de Salud Carlos III                   | Iglesias-Caballero et al             |
| EPI_ISL_804952 | Hospital Comarcal de Melilla                                                                 | Instituto de Salud Carlos III                   | Iglesias-Caballero et al             |
| EPI_ISL_804957 | Hospital Comarcal de Melilla                                                                 | Instituto de Salud Carlos III                   | Iglesias-Caballero et al             |
| EPI_ISL_804970 | Hospital Comarcal de Melilla                                                                 | Instituto de Salud Carlos III                   | Iglesias-Caballero et al             |
| EPI_ISL_804966 | Hospital Comarcal de Melilla                                                                 | Instituto de Salud Carlos III                   | Iglesias-Caballero et al             |
| EPI_ISL_804959 | Hospital Comarcal de Melilla                                                                 | Instituto de Salud Carlos III                   | Iglesias-Caballero et al             |
| EPI_ISL_804956 | Hospital Comarcal de Melilla                                                                 | Instituto de Salud Carlos III                   | Iglesias-Caballero et al             |
| EPI_ISL_862589 | Hospital Comarcal de Melilla                                                                 | Instituto de Salud Carlos III                   | Iglesias-Caballero et al             |
| EPI_ISL_804963 | Hospital Comarcal de Melilla                                                                 | Instituto de Salud Carlos III                   | Iglesias-Caballero et al             |
| EPI_ISL_804975 | Hospital Comarcal de Melilla                                                                 | Instituto de Salud Carlos III                   | Iglesias-Caballero et al             |
| EPI_ISL_862599 | Hospital Comarcal de Melilla                                                                 | Instituto de Salud Carlos III                   | Iglesias-Caballero et al             |
| EPI_ISL_862604 | Hospital Comarcal de Melilla                                                                 | Instituto de Salud Carlos III                   | Iglesias-Caballero et al             |
| EPI_ISL_862597 | Hospital Comarcal de Melilla                                                                 | Instituto de Salud Carlos III                   | Iglesias-Caballero et al             |
| EPI_ISL_804964 | Hospital Comarcal de Melilla                                                                 | Instituto de Salud Carlos III                   | Iglesias-Caballero et al             |
| EPI_ISL_862590 | Hospital Comarcal de Melilla                                                                 | Instituto de Salud Carlos III                   | Iglesias-Caballero et al             |
| EPI_ISL_490204 | Clinical Microbiology Laboratory- Basurto University Hospital                                | Biocruces-Bizkaia                               | Mikel J. Urutkoetxea-Gutierrez et al |



|                |                                                                                                                                                                                                                                 |                                                                                                        |                                        |
|----------------|---------------------------------------------------------------------------------------------------------------------------------------------------------------------------------------------------------------------------------|--------------------------------------------------------------------------------------------------------|----------------------------------------|
| EPI_ISL_483572 | Clinical Microbiology Laboratory- Basurto University Hospital                                                                                                                                                                   | Biocruces-Bizkaia                                                                                      | Mikel J. Urrutikoetxea-Gutierrez et al |
| EPI_ISL_452772 | Hospital Universitario Araba. Vitoria-Gasteiz,                                                                                                                                                                                  | SeqCOVID-SPAIN consortium/IBV(CSIC)                                                                    | Silvia Hernández Crespo et al          |
| EPI_ISL_452692 | Hospital Universitario Araba. Vitoria-Gasteiz,                                                                                                                                                                                  | SeqCOVID-SPAIN consortium/IBV(CSIC)                                                                    | Silvia Hernández Crespo et al          |
| EPI_ISL_509642 | Servicio de Microbiología. Hospital Universitario Donostia. OSI Donostialdea. Área de Enfermedades Infecciosas, Grupo de Infección Respiratoria y Resistencia Antimicrobiana. Instituto de Investigación Sanitaria Biodonostia  | SeqCOVID-SPAIN consortium/IBV(CSIC)                                                                    | Gustavo Cilla et al                    |
| EPI_ISL_468945 | Servicio de Microbiología. Hospital Universitario Donostia. OSI Donostialdea. Área de Enfermedades Infecciosas, Grupo de Infección Respiratoria y Resistencia Antimicrobiana. Instituto de Investigación Sanitaria Biodonostia. | SeqCOVID-SPAIN consortium/IBV(CSIC)                                                                    | Gustavo Cilla et al                    |
| EPI_ISL_582079 | Servicio de Microbiología. Hospital Universitario Donostia. OSI Donostialdea. Área de Enfermedades Infecciosas, Grupo de Infección Respiratoria y Resistencia Antimicrobiana. Instituto de Investigación Sanitaria Biodonostia  | SeqCOVID-SPAIN consortium/IBV(CSIC)                                                                    | Gustavo Cilla et al                    |
| EPI_ISL_654579 | Servicio de Microbiología. Hospital Universitario Donostia. OSI Donostialdea. Área de Enfermedades Infecciosas, Grupo de Infección Respiratoria y Resistencia Antimicrobiana. Instituto de Investigación Sanitaria Biodonostia  | SeqCOVID-SPAIN consortium/IBV(CSIC)                                                                    | Gustavo Cilla Eguiluz et al            |
| EPI_ISL_455351 | Hospital Txagorritxu                                                                                                                                                                                                            | Instituto de Salud Carlos III                                                                          | Iglesias-Caballero et al               |
| EPI_ISL_455336 | Hospital San Pedro                                                                                                                                                                                                              | Instituto de Salud Carlos III                                                                          | Iglesias-Caballero et al               |
| EPI_ISL_436227 | Servicio de Microbiología. Consorcio Hospital General Universitario de Valencia                                                                                                                                                 | Sequencing and Bioinformatics Service and Molecular Epidemiology Research Group. FISABIO-Public Health | Griselda De Marco et al                |
| EPI_ISL_419687 | Servicio de Microbiología. Consorcio Hospital General Universitario de Valencia                                                                                                                                                 | Sequencing and Bioinformatics Service and Molecular Epidemiology Research Group. FISABIO-Public Health | Giuseppe D'Auria et al                 |
| EPI_ISL_436361 | Servicio de Microbiología. Consorcio Hospital General Universitario de Valencia                                                                                                                                                 | Sequencing and Bioinformatics Service and Molecular Epidemiology Research Group. FISABIO-Public Health | Neris Garcia-Gonzalez et al            |
| EPI_ISL_416483 | Servicio de Microbiología. Consorcio Hospital General Universitario de Valencia                                                                                                                                                 | Sequencing and Bioinformatics Service and Molecular Epidemiology Research Group. FISABIO-Public Health | Maria Alma Bracho et al                |
| EPI_ISL_416484 | Servicio de Microbiología. Consorcio Hospital General Universitario de Valencia                                                                                                                                                 | Sequencing and Bioinformatics Service and Molecular Epidemiology Research Group. FISABIO-Public Health | Maria Dolores Ocete et al              |
| EPI_ISL_425178 | Servicio de Microbiología. Consorcio Hospital General Universitario de Valencia                                                                                                                                                 | Sequencing and Bioinformatics Service and Molecular Epidemiology Research Group. FISABIO-Public Health | David Navarro et al                    |
| EPI_ISL_416485 | Servicio de Microbiología. Consorcio Hospital General Universitario de Valencia                                                                                                                                                 | Sequencing and Bioinformatics Service and Molecular Epidemiology Research Group. FISABIO-Public Health | Griselda De Marco et al                |
| EPI_ISL_941192 | Servicio de Microbiología. Hospital Clínico Universitario de Valencia                                                                                                                                                           | SeqCOVID-SPAIN consortium/IBV(CSIC)                                                                    | David Navarro Ortega et al             |
| EPI_ISL_941193 | Servicio de Microbiología. Hospital Clínico Universitario de Valencia                                                                                                                                                           | SeqCOVID-SPAIN consortium/IBV(CSIC)                                                                    | David Navarro Ortega et al             |
| EPI_ISL_941198 | Servicio de Microbiología. Hospital Clínico Universitario de Valencia                                                                                                                                                           | SeqCOVID-SPAIN consortium/IBV(CSIC)                                                                    | David Navarro Ortega et al             |
| EPI_ISL_941199 | Servicio de Microbiología. Hospital Clínico Universitario de Valencia                                                                                                                                                           | SeqCOVID-SPAIN consortium/IBV(CSIC)                                                                    | David Navarro Ortega et al             |
| EPI_ISL_941203 | Servicio de Microbiología. Hospital Clínico Universitario de Valencia                                                                                                                                                           | SeqCOVID-SPAIN consortium/IBV(CSIC)                                                                    | David Navarro Ortega et al             |
| EPI_ISL_941205 | Servicio de Microbiología. Hospital Clínico Universitario de Valencia                                                                                                                                                           | SeqCOVID-SPAIN consortium/IBV(CSIC)                                                                    | David Navarro Ortega et al             |
| EPI_ISL_941206 | Servicio de Microbiología. Hospital Clínico Universitario de Valencia                                                                                                                                                           | SeqCOVID-SPAIN consortium/IBV(CSIC)                                                                    | David Navarro Ortega et al             |
| EPI_ISL_961223 | Hospital General Universitario de Alicante - Instituto de Investigación Sanitaria y Biomédica de Alicante                                                                                                                       | SeqCOVID-SPAIN consortium/IBV(CSIC)                                                                    | Maripaz Ventero Martín et al           |
| EPI_ISL_862717 | Centre for Dengue Research and AICBU, Department of Immunology and Molecular Medicine                                                                                                                                           | Centre for Dengue Research and AICBU, Department of Immunology and Molecular Medicine                  | Chandima Jeewandara et al              |
| EPI_ISL_862719 | Centre for Dengue Research and AICBU, Department of Immunology and Molecular Medicine                                                                                                                                           | Centre for Dengue Research and AICBU, Department of Immunology and Molecular Medicine                  | Chandima Jeewandara et al              |





|                |                                                                                         |                                                                                         |                                  |
|----------------|-----------------------------------------------------------------------------------------|-----------------------------------------------------------------------------------------|----------------------------------|
| EPI_ISL_517651 | Academic Hospital Paramaribo                                                            | Erasmus Medical Center                                                                  | Bas Oude Munnink et al           |
| EPI_ISL_517652 | Academic Hospital Paramaribo                                                            | Erasmus Medical Center                                                                  | Bas Oude Munnink et al           |
| EPI_ISL_517653 | Academic Hospital Paramaribo                                                            | Erasmus Medical Center                                                                  | Bas Oude Munnink et al           |
| EPI_ISL_517654 | Academic Hospital Paramaribo                                                            | Erasmus Medical Center                                                                  | Bas Oude Munnink et al           |
| EPI_ISL_517657 | Academic Hospital Paramaribo                                                            | Erasmus Medical Center                                                                  | Bas Oude Munnink et al           |
| EPI_ISL_517658 | Academic Hospital Paramaribo                                                            | Erasmus Medical Center                                                                  | Bas Oude Munnink et al           |
| EPI_ISL_517659 | Academic Hospital Paramaribo                                                            | Erasmus Medical Center                                                                  | Bas Oude Munnink et al           |
| EPI_ISL_517660 | Academic Hospital Paramaribo                                                            | Erasmus Medical Center                                                                  | Bas Oude Munnink et al           |
| EPI_ISL_518800 | Academic Hospital Paramaribo                                                            | Erasmus Medical Center                                                                  | Bas Oude Munnink et al           |
| EPI_ISL_518801 | Academic Hospital Paramaribo                                                            | Erasmus Medical Center                                                                  | Bas Oude Munnink et al           |
| EPI_ISL_518803 | Academic Hospital Paramaribo                                                            | Erasmus Medical Center                                                                  | Bas Oude Munnink et al           |
| EPI_ISL_518805 | Academic Hospital Paramaribo                                                            | Erasmus Medical Center                                                                  | Bas Oude Munnink et al           |
| EPI_ISL_518807 | Academic Hospital Paramaribo                                                            | Erasmus Medical Center                                                                  | Bas Oude Munnink et al           |
| EPI_ISL_518808 | Academic Hospital Paramaribo                                                            | Erasmus Medical Center                                                                  | Bas Oude Munnink et al           |
| EPI_ISL_518809 | Academic Hospital Paramaribo                                                            | Erasmus Medical Center                                                                  | Bas Oude Munnink et al           |
| EPI_ISL_518810 | Academic Hospital Paramaribo                                                            | Erasmus Medical Center                                                                  | Bas Oude Munnink et al           |
| EPI_ISL_518811 | Academic Hospital Paramaribo                                                            | Erasmus Medical Center                                                                  | Bas Oude Munnink et al           |
| EPI_ISL_518812 | Academic Hospital Paramaribo                                                            | Erasmus Medical Center                                                                  | Bas Oude Munnink et al           |
| EPI_ISL_517661 | Academic Hospital Paramaribo                                                            | Erasmus Medical Center                                                                  | Bas Oude Munnink et al           |
| EPI_ISL_517662 | Academic Hospital Paramaribo                                                            | Erasmus Medical Center                                                                  | Bas Oude Munnink et al           |
| EPI_ISL_411951 | Unit for Laboratory Development and Technology Transfer, Public Health Agency of Sweden | Unit for Laboratory Development and Technology Transfer, Public Health Agency of Sweden | Bengner et al                    |
| EPI_ISL_476139 | Folkhalsomyndigheten                                                                    | The Public Health Agency of Sweden                                                      | Oskar Karlsson Lindsjo et al     |
| EPI_ISL_430847 | HS mikrobiologi virus                                                                   | The Public Health Agency of Sweden                                                      | Zhibing Yun et al                |
| EPI_ISL_475544 | Karolinska Universitetslaboratoriet                                                     | The Public Health Agency of Sweden                                                      | Oskar Karlsson Lindsjo et al     |
| EPI_ISL_475545 | Karolinska Universitetslaboratoriet                                                     | The Public Health Agency of Sweden                                                      | Oskar Karlsson Lindsjo et al     |
| EPI_ISL_475546 | Karolinska Universitetslaboratoriet                                                     | The Public Health Agency of Sweden                                                      | Oskar Karlsson Lindsjo et al     |
| EPI_ISL_475547 | Karolinska Universitetslaboratoriet                                                     | The Public Health Agency of Sweden                                                      | Oskar Karlsson Lindsjo et al     |
| EPI_ISL_445224 | Narhalsan Olskroken VC                                                                  | The Public Health Agency of Sweden                                                      | Mahin Ghoroghi et al             |
| EPI_ISL_434655 | Uppsala Narakut Aleris                                                                  | The Public Health Agency of Sweden                                                      | Annika Nilsson et al             |
| EPI_ISL_434657 | Kristianstadkliniken                                                                    | The Public Health Agency of Sweden                                                      | Mia Settergren Hammer et al      |
| EPI_ISL_445231 | Uppsala Narakut Aleris                                                                  | The Public Health Agency of Sweden                                                      | Annika Nilsson et al             |
| EPI_ISL_475548 | Halmstad klinisk mikrobiologi                                                           | The Public Health Agency of Sweden                                                      | Oskar Karlsson Lindsjo et al     |
| EPI_ISL_454461 | Karolinska Universitetslaboratoriet                                                     | The Public Health Agency of Sweden                                                      | Anna-Malin Linde et al           |
| EPI_ISL_548248 | Ostersund klinisk mikrobiologi                                                          | The Public Health Agency of Sweden                                                      | Anna-Malin Linde et al           |
| EPI_ISL_475557 | Halmstad klinisk mikrobiologi                                                           | The Public Health Agency of Sweden                                                      | Oskar Karlsson Lindsjo et al     |
| EPI_ISL_510815 | NA                                                                                      | The Public Health Agency of Sweden                                                      | Oskar Karlsson Lindsjo et al     |
| EPI_ISL_534229 | Skanes universitetssjukhus Lund                                                         | The Public Health Agency of Sweden                                                      | Anna-Malin Linde et al           |
| EPI_ISL_676520 | Klinisk mikrobiologi                                                                    | The Public Health Agency of Sweden                                                      | Department of Microbiology et al |
| EPI_ISL_648181 | The Public Health Agency of Sweden                                                      | The Public Health Agency of Sweden                                                      | Anna-Malin Linde et al           |

|                |                                                |                                    |                                  |
|----------------|------------------------------------------------|------------------------------------|----------------------------------|
| EPI_ISL_676512 | Klinsisk mikrobiologi Linköping                | The Public Health Agency of Sweden | Department of Microbiology et al |
| EPI_ISL_594152 | Klinsisk mikrobiologi Linköping                | The Public Health Agency of Sweden | Anna-Malin Linde et al           |
| EPI_ISL_676489 | Klinisk mikrobiologi                           | The Public Health Agency of Sweden | Department of Microbiology et al |
| EPI_ISL_676490 | Klinisk mikrobiologi                           | The Public Health Agency of Sweden | Department of Microbiology et al |
| EPI_ISL_766694 | Klinisk mikrobiologi                           | The Public Health Agency of Sweden | Department of Microbiology et al |
| EPI_ISL_913311 | Klinisk mikrobiologi                           | The Public Health Agency of Sweden | Anna-Malin Linde et al           |
| EPI_ISL_450829 | Narhalsan Sjöbo vardcentral                    | The Public Health Agency of Sweden | Lovisa Hjerten et al             |
| EPI_ISL_469058 | Narhalsan Sjöbo vardcentral                    | The Public Health Agency of Sweden | Oskar Karlsson Lindsjö et al     |
| EPI_ISL_475516 | Uppsala Narakut Aleris                         | The Public Health Agency of Sweden | Oskar Karlsson Lindsjö et al     |
| EPI_ISL_469062 | Huddinge VC                                    | The Public Health Agency of Sweden | Oskar Karlsson Lindsjö et al     |
| EPI_ISL_676525 | Uppsala klinisk mikrobiologi                   | The Public Health Agency of Sweden | Department of Microbiology et al |
| EPI_ISL_676528 | Uppsala klinisk mikrobiologi                   | The Public Health Agency of Sweden | Department of Microbiology et al |
| EPI_ISL_582783 | Uppsala klinisk mikrobiologi                   | The Public Health Agency of Sweden | Anna-Malin Linde et al           |
| EPI_ISL_582791 | Orebro klinisk mikrobiologi                    | The Public Health Agency of Sweden | Anna-Malin Linde et al           |
| EPI_ISL_660378 | Orebro klinisk mikrobiologi                    | The Public Health Agency of Sweden | Anna-Malin Linde et al           |
| EPI_ISL_660380 | Orebro klinisk mikrobiologi                    | The Public Health Agency of Sweden | Anna-Malin Linde et al           |
| EPI_ISL_660413 | Klinsisk mikrobiologi Linköping                | The Public Health Agency of Sweden | Anna-Malin Linde et al           |
| EPI_ISL_648156 | The Public Health Agency of Sweden             | The Public Health Agency of Sweden | Anna-Malin Linde et al           |
| EPI_ISL_455850 | Karolinska Universitetslaboratoriet            | The Public Health Agency of Sweden | Anna-Malin Linde et al           |
| EPI_ISL_454881 | Karolinska Universitetslaboratoriet            | The Public Health Agency of Sweden | Anna-Malin Linde et al           |
| EPI_ISL_454883 | Karolinska Universitetslaboratoriet            | The Public Health Agency of Sweden | Anna-Malin Linde et al           |
| EPI_ISL_455860 | Karolinska Universitetslaboratoriet            | The Public Health Agency of Sweden | Anna-Malin Linde et al           |
| EPI_ISL_475558 | Karolinska Universitetslaboratoriet            | The Public Health Agency of Sweden | Oskar Karlsson Lindsjö et al     |
| EPI_ISL_455892 | Karolinska Universitetslaboratoriet            | The Public Health Agency of Sweden | Anna-Malin Linde et al           |
| EPI_ISL_455894 | Karolinska Universitetslaboratoriet            | The Public Health Agency of Sweden | Anna-Malin Linde et al           |
| EPI_ISL_455904 | Klinisk mikrobiologi, UAS                      | The Public Health Agency of Sweden | Anna-Malin Linde et al           |
| EPI_ISL_475158 | Halmstad klinisk mikrobiologi                  | The Public Health Agency of Sweden | Oskar Karlsson Lindsjö et al     |
| EPI_ISL_475126 | Umeå klinisk mikrobiologi                      | The Public Health Agency of Sweden | Oskar Karlsson Lindsjö et al     |
| EPI_ISL_510822 | Klinisk mikrobiologi centralsjukhuset Karlstad | The Public Health Agency of Sweden | Oskar Karlsson Lindsjö et al     |
| EPI_ISL_510823 | Klinisk mikrobiologi centralsjukhuset Karlstad | The Public Health Agency of Sweden | Oskar Karlsson Lindsjö et al     |
| EPI_ISL_455110 | Scania Halsocenter, B288                       | The Public Health Agency of Sweden | Christina Lergin et al           |
| EPI_ISL_615088 | Karolinska Universitetslaboratoriet            | The Public Health Agency of Sweden | Anna-Malin Linde et al           |
| EPI_ISL_510838 | Karolinska Universitetslaboratoriet            | The Public Health Agency of Sweden | Oskar Karlsson Lindsjö et al     |
| EPI_ISL_548250 | Klinisk mikrobiologi NAL Trollhättan           | The Public Health Agency of Sweden | Anna-Malin Linde et al           |
| EPI_ISL_548251 | Klinisk mikrobiologi NAL Trollhättan           | The Public Health Agency of Sweden | Anna-Malin Linde et al           |
| EPI_ISL_510861 | Karolinska Universitetslaboratoriet            | The Public Health Agency of Sweden | Oskar Karlsson Lindsjö et al     |
| EPI_ISL_582795 | Unilabs Eskilstuna                             | The Public Health Agency of Sweden | Anna-Malin Linde et al           |
| EPI_ISL_623086 | Halmstad klinisk mikrobiologi                  | The Public Health Agency of Sweden | Anna-Malin Linde et al           |
| EPI_ISL_623087 | Klinisk mikrobiologi NAL Trollhättan           | The Public Health Agency of Sweden | Anna-Malin Linde et al           |

|                |                                                     |                                    |                                  |
|----------------|-----------------------------------------------------|------------------------------------|----------------------------------|
| EPI_ISL_548253 | Klinisk mikrobiologi NAL Trollhattan                | The Public Health Agency of Sweden | Anna-Malin Linde et al           |
| EPI_ISL_623088 | Klinisk mikrobiologi NAL Trollhattan                | The Public Health Agency of Sweden | Anna-Malin Linde et al           |
| EPI_ISL_560983 | Karolinska universitetslaboratoriet SOLNA           | The Public Health Agency of Sweden | Anna-Malin Linde et al           |
| EPI_ISL_534235 | Karolinska universitetslaboratoriet SOLNA           | The Public Health Agency of Sweden | Anna-Malin Linde et al           |
| EPI_ISL_534237 | Lanssjukhuset Kalmar                                | The Public Health Agency of Sweden | Anna-Malin Linde et al           |
| EPI_ISL_560986 | Sundsvalls sjukhus                                  | The Public Health Agency of Sweden | Anna-Malin Linde et al           |
| EPI_ISL_534245 | Kliniskt mikrobiologiska laboratoriet               | The Public Health Agency of Sweden | Anna-Malin Linde et al           |
| EPI_ISL_534250 | Gavle Sjukhus                                       | The Public Health Agency of Sweden | Anna-Malin Linde et al           |
| EPI_ISL_676514 | Gavleborg                                           | The Public Health Agency of Sweden | Department of Microbiology et al |
| EPI_ISL_660417 | Klinisk mikrobiologi                                | The Public Health Agency of Sweden | Anna-Malin Linde et al           |
| EPI_ISL_660419 | Klinisk mikrobiologi                                | The Public Health Agency of Sweden | Anna-Malin Linde et al           |
| EPI_ISL_660421 | Klinisk mikrobiologi                                | The Public Health Agency of Sweden | Anna-Malin Linde et al           |
| EPI_ISL_615100 | Klinisk mikrobiologi Lanssjukhuset Ryhov, Jonkoping | The Public Health Agency of Sweden | Anna-Malin Linde et al           |
| EPI_ISL_648132 | The Public Health Agency of Sweden                  | The Public Health Agency of Sweden | Anna-Malin Linde et al           |
| EPI_ISL_582840 | Narhalsan Fjallbacka VC                             | The Public Health Agency of Sweden | Anna-Malin Linde et al           |
| EPI_ISL_648163 | Gavle klinisk mikrobiologi                          | The Public Health Agency of Sweden | Anna-Malin Linde et al           |
| EPI_ISL_615105 | Halmstad klinisk mikrobiologi                       | The Public Health Agency of Sweden | Anna-Malin Linde et al           |
| EPI_ISL_766625 | Klinisk mikrobiologi                                | The Public Health Agency of Sweden | Department of Microbiology et al |
| EPI_ISL_766627 | Klinisk mikrobiologi                                | The Public Health Agency of Sweden | Department of Microbiology et al |
| EPI_ISL_831961 | Orebro klinisk mikrobiologi                         | The Public Health Agency of Sweden | Department of Microbiology et al |
| EPI_ISL_648140 | Gavle klinisk mikrobiologi                          | The Public Health Agency of Sweden | Anna-Malin Linde et al           |
| EPI_ISL_648143 | The Public Health Agency of Sweden                  | The Public Health Agency of Sweden | Anna-Malin Linde et al           |
| EPI_ISL_654498 | The Public Health Agency of Sweden                  | The Public Health Agency of Sweden | Anna-Malin Linde et al           |
| EPI_ISL_648171 | The Public Health Agency of Sweden                  | The Public Health Agency of Sweden | Anna-Malin Linde et al           |
| EPI_ISL_648167 | Eskilstuna                                          | The Public Health Agency of Sweden | Anna-Malin Linde et al           |
| EPI_ISL_654502 | The Public Health Agency of Sweden                  | The Public Health Agency of Sweden | Anna-Malin Linde et al           |
| EPI_ISL_648166 | Eskilstuna                                          | The Public Health Agency of Sweden | Anna-Malin Linde et al           |
| EPI_ISL_676516 | Laboratoriemedicin, Klinisk mikrobiologi            | The Public Health Agency of Sweden | Department of Microbiology et al |
| EPI_ISL_710593 | MLF Care AB                                         | The Public Health Agency of Sweden | Department of Microbiology et al |
| EPI_ISL_676517 | Laboratoriemedicin, Klinisk mikrobiologi            | The Public Health Agency of Sweden | Department of Microbiology et al |
| EPI_ISL_676539 | Laboratoriemedicin, Klinisk mikrobiologi            | The Public Health Agency of Sweden | Department of Microbiology et al |
| EPI_ISL_676518 | Klinisk Mikrobiologi                                | The Public Health Agency of Sweden | Department of Microbiology et al |
| EPI_ISL_676500 | Klinisk Mikrobiologi                                | The Public Health Agency of Sweden | Department of Microbiology et al |
| EPI_ISL_766611 | Klinisk mikrobiologi                                | The Public Health Agency of Sweden | Department of Microbiology et al |
| EPI_ISL_766619 | Klinisk mikrobiologi                                | The Public Health Agency of Sweden | Department of Microbiology et al |
| EPI_ISL_766638 | Klinisk mikrobiologi                                | The Public Health Agency of Sweden | Department of Microbiology et al |
| EPI_ISL_775546 | Klinisk Mikrobiologi                                | The Public Health Agency of Sweden | Department of Microbiology et al |
| EPI_ISL_775584 | Klinisk mikrobiologi                                | The Public Health Agency of Sweden | Department of Microbiology et al |
| EPI_ISL_789030 | Klinisk mikrobiologi, Laboratoriemedicin            | The Public Health Agency of Sweden | Department of Microbiology et al |

|                |                                           |                                                              |                                  |
|----------------|-------------------------------------------|--------------------------------------------------------------|----------------------------------|
| EPI_ISL_789031 | Klinisk mikrobiologi, Laboratoriemedicin  | The Public Health Agency of Sweden                           | Department of Microbiology et al |
| EPI_ISL_766693 | Klinisk mikrobiologi, Laboratoriemedicin  | The Public Health Agency of Sweden                           | Department of Microbiology et al |
| EPI_ISL_766692 | Klinisk mikrobiologi, Laboratoriemedicin  | The Public Health Agency of Sweden                           | Department of Microbiology et al |
| EPI_ISL_913490 | Klinisk mikrobiologi                      | The Public Health Agency of Sweden                           | Anna-Malin Linde et al           |
| EPI_ISL_913310 | Klinisk mikrobiologi                      | The Public Health Agency of Sweden                           | Anna-Malin Linde et al           |
| EPI_ISL_934331 | Klinisk mikrobiologi                      | The Public Health Agency of Sweden                           | Anna-Malin Linde et al           |
| EPI_ISL_934332 | Klinisk mikrobiologi                      | The Public Health Agency of Sweden                           | Anna-Malin Linde et al           |
| EPI_ISL_934333 | Klinisk mikrobiologi                      | The Public Health Agency of Sweden                           | Anna-Malin Linde et al           |
| EPI_ISL_913313 | Klinisk mikrobiologi                      | The Public Health Agency of Sweden                           | Anna-Malin Linde et al           |
| EPI_ISL_934338 | Klinisk mikrobiologi                      | The Public Health Agency of Sweden                           | Anna-Malin Linde et al           |
| EPI_ISL_913325 | Klinisk mikrobiologi                      | The Public Health Agency of Sweden                           | Anna-Malin Linde et al           |
| EPI_ISL_913312 | Mikrobiologen                             | The Public Health Agency of Sweden                           | Anna-Malin Linde et al           |
| EPI_ISL_913260 | Klinisk mikrobiologi                      | The Public Health Agency of Sweden                           | Anna-Malin Linde et al           |
| EPI_ISL_913272 | Klinisk mikrobiologi                      | The Public Health Agency of Sweden                           | Anna-Malin Linde et al           |
| EPI_ISL_913273 | Klinisk mikrobiologi                      | The Public Health Agency of Sweden                           | Anna-Malin Linde et al           |
| EPI_ISL_913264 | Klinisk mikrobiologi                      | The Public Health Agency of Sweden                           | Anna-Malin Linde et al           |
| EPI_ISL_913265 | Klinisk mikrobiologi                      | The Public Health Agency of Sweden                           | Anna-Malin Linde et al           |
| EPI_ISL_934345 | Klinisk mikrobiologi                      | The Public Health Agency of Sweden                           | Anna-Malin Linde et al           |
| EPI_ISL_934350 | Klinisk mikrobiologi                      | The Public Health Agency of Sweden                           | Anna-Malin Linde et al           |
| EPI_ISL_934360 | Klinisk mikrobiologi                      | The Public Health Agency of Sweden                           | Anna-Malin Linde et al           |
| EPI_ISL_913467 | Synlab Medilab, Mikrobiologi              | The Public Health Agency of Sweden                           | Anna-Malin Linde et al           |
| EPI_ISL_934379 | Klinisk mikrobiologi                      | The Public Health Agency of Sweden                           | Anna-Malin Linde et al           |
| EPI_ISL_913457 | Klinisk mikrobiologi                      | The Public Health Agency of Sweden                           | Anna-Malin Linde et al           |
| EPI_ISL_985056 | Klinisk mikrobiologi, Region Västerbotten | CBRN Defence and Security, Swedish Defence Research Agency   | Andreas Sjödin et al             |
| EPI_ISL_985335 | Klinisk mikrobiologi, Region Västerbotten | CBRN Defence and Security, Swedish Defence Research Agency   | Andreas Sjödin et al             |
| EPI_ISL_985338 | Klinisk mikrobiologi, Region Västerbotten | CBRN Defence and Security, Swedish Defence Research Agency   | Andreas Sjödin et al             |
| EPI_ISL_985343 | Klinisk mikrobiologi, Region Västerbotten | CBRN Defence and Security, Swedish Defence Research Agency   | Andreas Sjödin et al             |
| EPI_ISL_985346 | Klinisk mikrobiologi, Region Västerbotten | CBRN Defence and Security, Swedish Defence Research Agency   | Andreas Sjödin et al             |
| EPI_ISL_985347 | Klinisk mikrobiologi, Region Västerbotten | CBRN Defence and Security, Swedish Defence Research Agency   | Andreas Sjödin et al             |
| EPI_ISL_985348 | Klinisk mikrobiologi, Region Västerbotten | CBRN Defence and Security, Swedish Defence Research Agency   | Andreas Sjödin et al             |
| EPI_ISL_985353 | Klinisk mikrobiologi, Region Västerbotten | CBRN Defence and Security, Swedish Defence Research Agency   | Andreas Sjödin et al             |
| EPI_ISL_985361 | Klinisk mikrobiologi, Region Västerbotten | CBRN Defence and Security, Swedish Defence Research Agency   | Andreas Sjödin et al             |
| EPI_ISL_985367 | Klinisk mikrobiologi, Region Västerbotten | CBRN Defence and Security, Swedish Defence Research Agency   | Andreas Sjödin et al             |
| EPI_ISL_985368 | Klinisk mikrobiologi, Region Västerbotten | CBRN Defence and Security, Swedish Defence Research Agency   | Andreas Sjödin et al             |
| EPI_ISL_985381 | Klinisk mikrobiologi, Region Västerbotten | CBRN Defence and Security, Swedish Defence Research Agency   | Andreas Sjödin et al             |
| EPI_ISL_985383 | Klinisk mikrobiologi, Region Västerbotten | CBRN Defence and Security, Swedish Defence Research Agency   | Andreas Sjödin et al             |
| EPI_ISL_985386 | Klinisk mikrobiologi, Region Västerbotten | CBRN Defence and Security, Swedish Defence Research Agency   | Andreas Sjödin et al             |
| EPI_ISL_486527 | Viollier AG                               | Department of Biosystems Science and Engineering, ETH Zürich | Christian Beisel et al           |
| EPI_ISL_539436 | Viollier AG                               | Department of Biosystems Science and Engineering, ETH Zürich | Christian Beisel et al           |

|                 |                                                            |                                                              |                        |
|-----------------|------------------------------------------------------------|--------------------------------------------------------------|------------------------|
| EPI_ISL_560419  | Viollier AG                                                | Department of Biosystems Science and Engineering, ETH Zürich | Christian Beisel et al |
| EPI_ISL_560420  | Viollier AG                                                | Department of Biosystems Science and Engineering, ETH Zürich | Christian Beisel et al |
| EPI_ISL_721719  | Viollier AG                                                | Department of Biosystems Science and Engineering, ETH Zürich | Christian Beisel et al |
| EPI_ISL_721671  | Viollier AG                                                | Department of Biosystems Science and Engineering, ETH Zürich | Christian Beisel et al |
| EPI_ISL_1004133 | Viollier AG                                                | Department of Biosystems Science and Engineering, ETH Zürich | Chaoran Chen et al     |
| EPI_ISL_415457  | University Hospitals of Geneva Laboratory of Virology      | University Hospitals of Geneva Laboratory of Virology        | Laubscher F. et al     |
| EPI_ISL_524474  | Department of Infectious Diseases, Cantonal Hospital Baden | Institute of Medical Virology, University of Zurich          | Stefan Schmutz et al   |
| EPI_ISL_524481  | Department of Infectious Diseases, Cantonal Hospital Baden | Institute of Medical Virology, University of Zurich          | Stefan Schmutz et al   |
| EPI_ISL_468247  | Viollier AG                                                | Department of Biosystems Science and Engineering, ETH Zürich | Christian Beisel et al |
| EPI_ISL_476095  | Viollier AG                                                | Department of Biosystems Science and Engineering, ETH Zürich | Christian Beisel et al |
| EPI_ISL_476097  | Viollier AG                                                | Department of Biosystems Science and Engineering, ETH Zürich | Christian Beisel et al |
| EPI_ISL_476099  | Viollier AG                                                | Department of Biosystems Science and Engineering, ETH Zürich | Christian Beisel et al |
| EPI_ISL_483651  | Viollier AG                                                | Department of Biosystems Science and Engineering, ETH Zürich | Christian Beisel et al |
| EPI_ISL_483654  | Viollier AG                                                | Department of Biosystems Science and Engineering, ETH Zürich | Christian Beisel et al |
| EPI_ISL_510798  | Viollier AG                                                | Department of Biosystems Science and Engineering, ETH Zürich | Christian Beisel et al |
| EPI_ISL_539447  | Viollier AG                                                | Department of Biosystems Science and Engineering, ETH Zürich | Christian Beisel et al |
| EPI_ISL_541433  | Viollier AG                                                | Department of Biosystems Science and Engineering, ETH Zürich | Christian Beisel et al |
| EPI_ISL_541434  | Viollier AG                                                | Department of Biosystems Science and Engineering, ETH Zürich | Christian Beisel et al |
| EPI_ISL_560429  | Viollier AG                                                | Department of Biosystems Science and Engineering, ETH Zürich | Christian Beisel et al |
| EPI_ISL_721764  | Viollier AG                                                | Department of Biosystems Science and Engineering, ETH Zürich | Christian Beisel et al |
| EPI_ISL_737636  | Viollier AG                                                | Department of Biosystems Science and Engineering, ETH Zürich | Chaoran Chen et al     |
| EPI_ISL_768012  | Viollier AG                                                | Department of Biosystems Science and Engineering, ETH Zürich | Chaoran Chen et al     |
| EPI_ISL_899290  | Viollier AG                                                | Department of Biosystems Science and Engineering, ETH Zürich | Christian Beisel et al |
| EPI_ISL_1002780 | Viollier AG                                                | Department of Biosystems Science and Engineering, ETH Zürich | Chaoran Chen et al     |
| EPI_ISL_467006  | Viollier AG                                                | Department of Biosystems Science and Engineering, ETH Zürich | Christian Beisel et al |
| EPI_ISL_476101  | Viollier AG                                                | Department of Biosystems Science and Engineering, ETH Zürich | Christian Beisel et al |
| EPI_ISL_476106  | Viollier AG                                                | Department of Biosystems Science and Engineering, ETH Zürich | Christian Beisel et al |
| EPI_ISL_500920  | Viollier AG                                                | Department of Biosystems Science and Engineering, ETH Zürich | Christian Beisel et al |
| EPI_ISL_500933  | Viollier AG                                                | Department of Biosystems Science and Engineering, ETH Zürich | Christian Beisel et al |
| EPI_ISL_535598  | Viollier AG                                                | Department of Biosystems Science and Engineering, ETH Zürich | Christian Beisel et al |
| EPI_ISL_560456  | Viollier AG                                                | Department of Biosystems Science and Engineering, ETH Zürich | Christian Beisel et al |
| EPI_ISL_603455  | Viollier AG                                                | Department of Biosystems Science and Engineering, ETH Zürich | Christian Beisel et al |
| EPI_ISL_1003962 | Viollier AG                                                | Department of Biosystems Science and Engineering, ETH Zürich | Chaoran Chen et al     |
| EPI_ISL_1004046 | Viollier AG                                                | Department of Biosystems Science and Engineering, ETH Zürich | Chaoran Chen et al     |
| EPI_ISL_1004144 | Viollier AG                                                | Department of Biosystems Science and Engineering, ETH Zürich | Chaoran Chen et al     |
| EPI_ISL_581675  | University Hospital Basel, Clinical Virology               | University Hospital Basel, Clinical Bacteriology             | Madlen Stange et al    |
| EPI_ISL_581703  | University Hospital Basel, Clinical Virology               | University Hospital Basel, Clinical Bacteriology             | Madlen Stange et al    |
| EPI_ISL_581893  | University Hospital Basel, Clinical Virology               | University Hospital Basel, Clinical Bacteriology             | Madlen Stange et al    |
| EPI_ISL_830870  | University Hospital Basel, Clinical Virology               | University Hospital Basel, Clinical Bacteriology             | Tim Roloff et al       |





|                 |                                                        |                                                              |                                |
|-----------------|--------------------------------------------------------|--------------------------------------------------------------|--------------------------------|
| EPI_ISL_548159  | Laboratoire de Virologie, HUG                          | Swiss National Reference Centre for Influenza                | LAUBSCHER F. et al             |
| EPI_ISL_548237  | Laboratoire de Virologie, HUG                          | Swiss National Reference Centre for Influenza                | LAUBSCHER F. et al             |
| EPI_ISL_476132  | Viollier AG                                            | Department of Biosystems Science and Engineering, ETH Zürich | Christian Beisel et al         |
| EPI_ISL_486515  | Viollier AG                                            | Department of Biosystems Science and Engineering, ETH Zürich | Christian Beisel et al         |
| EPI_ISL_486531  | Viollier AG                                            | Department of Biosystems Science and Engineering, ETH Zürich | Christian Beisel et al         |
| EPI_ISL_541465  | Viollier AG                                            | Department of Biosystems Science and Engineering, ETH Zürich | Christian Beisel et al         |
| EPI_ISL_857524  | Swiss National Reference Centre for Influenza          | Swiss National Reference Centre for Influenza                | Tim Roloff et al               |
| EPI_ISL_512002  | Viollier AG                                            | Department of Biosystems Science and Engineering, ETH Zürich | Christian Beisel et al         |
| EPI_ISL_581715  | University Hospital Basel, Clinical Virology           | University Hospital Basel, Clinical Bacteriology             | Madlen Stange et al            |
| EPI_ISL_489974  | Viollier AG                                            | Department of Biosystems Science and Engineering, ETH Zürich | Christian Beisel et al         |
| EPI_ISL_1003974 | Viollier AG                                            | Department of Biosystems Science and Engineering, ETH Zürich | Chaoran Chen et al             |
| EPI_ISL_693929  | Viollier AG                                            | Department of Biosystems Science and Engineering, ETH Zürich | Christian Beisel et al         |
| EPI_ISL_737620  | Viollier AG                                            | Department of Biosystems Science and Engineering, ETH Zürich | Chaoran Chen et al             |
| EPI_ISL_721683  | Viollier AG                                            | Department of Biosystems Science and Engineering, ETH Zürich | Christian Beisel et al         |
| EPI_ISL_603644  | Viollier AG                                            | Department of Biosystems Science and Engineering, ETH Zürich | Christian Beisel et al         |
| EPI_ISL_590832  | Institute of Medical Virology, University of Zurich    | Institute of Medical Virology, University of Zurich          | Marie O. Pohl et al            |
| EPI_ISL_413996  | Laboratoire de Virologie, HUG                          | Swiss National Reference Centre for Influenza                | LAUBSCHER Florian et al. et al |
| EPI_ISL_468295  | Viollier AG                                            | Department of Biosystems Science and Engineering, ETH Zürich | Christian Beisel et al         |
| EPI_ISL_603391  | Viollier AG                                            | Department of Biosystems Science and Engineering, ETH Zürich | Christian Beisel et al         |
| EPI_ISL_847855  | University Hospitals of Geneva, Laboratory of Virology | HUG, Laboratory of Virology and the Health2030 Genome Center | Samuel Cordey et al            |
| EPI_ISL_467004  | Viollier AG                                            | Department of Biosystems Science and Engineering, ETH Zürich | Christian Beisel et al         |
| EPI_ISL_483656  | Viollier AG                                            | Department of Biosystems Science and Engineering, ETH Zürich | Christian Beisel et al         |
| EPI_ISL_486533  | Viollier AG                                            | Department of Biosystems Science and Engineering, ETH Zürich | Christian Beisel et al         |
| EPI_ISL_541476  | Viollier AG                                            | Department of Biosystems Science and Engineering, ETH Zürich | Christian Beisel et al         |
| EPI_ISL_541489  | Viollier AG                                            | Department of Biosystems Science and Engineering, ETH Zürich | Christian Beisel et al         |
| EPI_ISL_693886  | Viollier AG                                            | Department of Biosystems Science and Engineering, ETH Zürich | Christian Beisel et al         |
| EPI_ISL_1004116 | Viollier AG                                            | Department of Biosystems Science and Engineering, ETH Zürich | Chaoran Chen et al             |
| EPI_ISL_486503  | Viollier AG                                            | Department of Biosystems Science and Engineering, ETH Zürich | Christian Beisel et al         |
| EPI_ISL_486504  | Viollier AG                                            | Department of Biosystems Science and Engineering, ETH Zürich | Christian Beisel et al         |
| EPI_ISL_693969  | Viollier AG                                            | Department of Biosystems Science and Engineering, ETH Zürich | Christian Beisel et al         |
| EPI_ISL_500880  | Viollier AG                                            | Department of Biosystems Science and Engineering, ETH Zürich | Christian Beisel et al         |
| EPI_ISL_510716  | Viollier AG                                            | Department of Biosystems Science and Engineering, ETH Zürich | Christian Beisel et al         |
| EPI_ISL_512044  | Viollier AG                                            | Department of Biosystems Science and Engineering, ETH Zürich | Christian Beisel et al         |
| EPI_ISL_516552  | Viollier AG                                            | Department of Biosystems Science and Engineering, ETH Zürich | Christian Beisel et al         |
| EPI_ISL_516553  | Viollier AG                                            | Department of Biosystems Science and Engineering, ETH Zürich | Christian Beisel et al         |
| EPI_ISL_535609  | Viollier AG                                            | Department of Biosystems Science and Engineering, ETH Zürich | Christian Beisel et al         |
| EPI_ISL_541513  | Viollier AG                                            | Department of Biosystems Science and Engineering, ETH Zürich | Christian Beisel et al         |
| EPI_ISL_614979  | Viollier AG                                            | Department of Biosystems Science and Engineering, ETH Zürich | Christian Beisel et al         |
| EPI_ISL_693828  | Viollier AG                                            | Department of Biosystems Science and Engineering, ETH Zürich | Christian Beisel et al         |

|                |                                                             |                                                                                           |                      |
|----------------|-------------------------------------------------------------|-------------------------------------------------------------------------------------------|----------------------|
| EPI_ISL_796326 | Viollier AG                                                 | Department of Biosystems Science and Engineering, ETH Zürich                              | Chaoran Chen et al   |
| EPI_ISL_413021 | Klinik Hirslanden Zurich                                    | Institute of Medical Virology, University of Zurich                                       | Stefan Schmutz et al |
| EPI_ISL_524482 | University Hospital Zürich                                  | Institute of Medical Virology, University of Zurich                                       | Verena Kufner et al  |
| EPI_ISL_939662 | Division of Infectious Diseases, University Hospital Zürich | Institute of Medical Virology, University of Zurich                                       | Stefan Schmutz et al |
| EPI_ISL_939667 | Division of Infectious Diseases, University Hospital Zürich | Institute of Medical Virology, University of Zurich                                       | Stefan Schmutz et al |
| EPI_ISL_939668 | Division of Infectious Diseases, University Hospital Zürich | Institute of Medical Virology, University of Zurich                                       | Stefan Schmutz et al |
| EPI_ISL_590824 | Institute of Medical Virology, University of Zurich         | Institute of Medical Virology, University of Zurich                                       | Marie O. Pohl et al  |
| EPI_ISL_847939 | University Hospitals of Geneva, Laboratory of Virology      | HUG, Laboratory of Virology and the Health2030 Genome Center                              | Samuel Cordey et al  |
| EPI_ISL_406031 | Centers for Disease Control, R.O.C. (Taiwan)                | Centers for Disease Control, R.O.C. (Taiwan)                                              | Ji-Rong Yang et al   |
| EPI_ISL_411926 | Taiwan Centers for Disease Control                          | Taiwan Centers for Disease Control                                                        | Ji-Rong Yang et al   |
| EPI_ISL_411927 | Taiwan Centers for Disease Control                          | Taiwan Centers for Disease Control                                                        | Ji-Rong Yang et al   |
| EPI_ISL_428489 | Centers for Disease Control, R.O.C. (Taiwan)                | Centers for Disease Control, R.O.C. (Taiwan)                                              | Ji-Rong Yang et al   |
| EPI_ISL_428488 | Centers for Disease Control, R.O.C. (Taiwan)                | Centers for Disease Control, R.O.C. (Taiwan)                                              | Ji-Rong Yang et al   |
| EPI_ISL_857314 | Centers for Disease Control, R.O.C. (Taiwan)                | Centers for Disease Control, R.O.C. (Taiwan)                                              | Ji-Rong Yang et al   |
| EPI_ISL_411915 | Laboratory Medicine                                         | Department of Laboratory Medicine, Lin-Kou Chang Gung Memorial Hospital, Taoyuan, Taiwan. | Kuo-Chien Tsao et al |
| EPI_ISL_417518 | Laboratory Medicine                                         | Department of Laboratory Medicine, Lin-Kou Chang Gung Memorial Hospital, Taoyuan, Taiwan  | Kuo-Chien Tsao et al |
| EPI_ISL_415741 | Laboratory Medicine                                         | Department of Laboratory Medicine, Lin-Kou Chang Gung Memorial Hospital, Taoyuan, Taiwan  | Kuo-Chien Tsao et al |
| EPI_ISL_415742 | Laboratory Medicine                                         | Department of Laboratory Medicine, Lin-Kou Chang Gung Memorial Hospital, Taoyuan, Taiwan  | Kuo-Chien Tsao et al |
| EPI_ISL_415743 | Laboratory Medicine                                         | Department of Laboratory Medicine, Lin-Kou Chang Gung Memorial Hospital, Taoyuan, Taiwan  | Kuo-Chien Tsao et al |
| EPI_ISL_417522 | Laboratory Medicine                                         | Department of Laboratory Medicine, Lin-Kou Chang Gung Memorial Hospital, Taoyuan, Taiwan  | Kuo-Chien Tsao et al |
| EPI_ISL_424975 | Laboratory Medicine                                         | Department of Laboratory Medicine, Lin-Kou Chang Gung Memorial Hospital, Taoyuan, Taiwan  | Kuo-Chien Tsao et al |
| EPI_ISL_444274 | Laboratory Medicine                                         | Department of Laboratory Medicine, Lin-Kou Chang Gung Memorial Hospital, Taoyuan, Taiwan  | Kuo-Chien Tsao et al |
| EPI_ISL_452178 | Laboratory Medicine                                         | Department of Laboratory Medicine, Lin-Kou Chang Gung Memorial Hospital, Taoyuan, Taiwan  | Kuo-Chien Tsao et al |
| EPI_ISL_452179 | Laboratory Medicine                                         | Department of Laboratory Medicine, Lin-Kou Chang Gung Memorial Hospital, Taoyuan, Taiwan  | Kuo-Chien Tsao et al |
| EPI_ISL_464093 | Laboratory Medicine                                         | Department of Laboratory Medicine, Lin-Kou Chang Gung Memorial Hospital, Taoyuan, Taiwan  | Kuo-Chien Tsao et al |
| EPI_ISL_464094 | Laboratory Medicine                                         | Department of Laboratory Medicine, Lin-Kou Chang Gung Memorial Hospital, Taoyuan, Taiwan  | Kuo-Chien Tsao et al |
| EPI_ISL_660543 | Laboratory Medicine                                         | Department of Laboratory Medicine, Lin-Kou Chang Gung Memorial Hospital, Taoyuan, Taiwan  | Kuo-Chien Tsao et al |
| EPI_ISL_660544 | Laboratory Medicine                                         | Department of Laboratory Medicine, Lin-Kou Chang Gung Memorial Hospital, Taoyuan, Taiwan  | Kuo-Chien Tsao et al |
| EPI_ISL_660545 | Laboratory Medicine                                         | Department of Laboratory Medicine, Lin-Kou Chang Gung Memorial Hospital, Taoyuan, Taiwan  | Kuo-Chien Tsao et al |
| EPI_ISL_667809 | Laboratory Medicine                                         | Department of Laboratory Medicine, Lin-Kou Chang Gung Memorial Hospital, Taoyuan, Taiwan  | Kuo-Chien Tsao et al |



|                |                                                                        |                                                                                                                                                                                                                  |                                |
|----------------|------------------------------------------------------------------------|------------------------------------------------------------------------------------------------------------------------------------------------------------------------------------------------------------------|--------------------------------|
| EPI_ISL_872597 | Department of Laboratory Medicine, National Taiwan University Hospital | Microbial Genomics Core Lab, National Taiwan University Centers of Genomic and Precision Medicine                                                                                                                | Shiou-Hwei Yeh et al           |
| EPI_ISL_872598 | Department of Laboratory Medicine, National Taiwan University Hospital | Microbial Genomics Core Lab, National Taiwan University Centers of Genomic and Precision Medicine                                                                                                                | Shiou-Hwei Yeh et al           |
| EPI_ISL_872599 | Department of Laboratory Medicine, National Taiwan University Hospital | Microbial Genomics Core Lab, National Taiwan University Centers of Genomic and Precision Medicine                                                                                                                | Shiou-Hwei Yeh et al           |
| EPI_ISL_426629 | TSGH-CP molecular lab                                                  | TSGH-CP molecular lab                                                                                                                                                                                            | Cherng-Lih Perng et al         |
| EPI_ISL_436108 | TSGH-CP molecular lab                                                  | TSGH-CP molecular lab                                                                                                                                                                                            | Cherng-Lih Perng et al         |
| EPI_ISL_436099 | TSGH-CP molecular lab                                                  | TSGH-CP molecular lab                                                                                                                                                                                            | Cherng-Lih Perng et al         |
| EPI_ISL_447252 | TSGH-CP molecular lab                                                  | TSGH-CP molecular lab                                                                                                                                                                                            | Cherng-Lih Perng et al         |
| EPI_ISL_447257 | TSGH-CP molecular lab                                                  | TSGH-CP molecular lab                                                                                                                                                                                            | Cherng-Lih Perng et al         |
| EPI_ISL_447593 | TSGH-CP molecular lab                                                  | TSGH-CP molecular lab                                                                                                                                                                                            | Cherng-Lih Perng et al         |
| EPI_ISL_457726 | TSGH-CP molecular lab                                                  | TSGH-CP molecular lab                                                                                                                                                                                            | Cherng-Lih Perng et al         |
| EPI_ISL_457730 | TSGH-CP molecular lab                                                  | TSGH-CP molecular lab                                                                                                                                                                                            | Cherng-Lih Perng et al         |
| EPI_ISL_457733 | TSGH-CP molecular lab                                                  | TSGH-CP molecular lab                                                                                                                                                                                            | Cherng-Lih Perng et al         |
| EPI_ISL_403962 | Bamrasnaradura Hospital                                                | Department of Medical Sciences, Ministry of Public Health, Thailand 2. Thai Red Cross Emerging Infectious Diseases - Health Science Centre 3. Department of Disease Control, Ministry of Public Health, Thailand | Pilailuk et al                 |
| EPI_ISL_403963 | Bamrasnaradura Hospital                                                | Department of Medical Sciences, Ministry of Public Health, Thailand 2. Thai Red Cross Emerging Infectious Diseases - Health Science Centre 3. Department of Disease Control, Ministry of Public Health, Thailand | Pilailuk et al                 |
| EPI_ISL_882796 | Office of Diseases Prevention and Control Region 4 Saraburi            | COVID-19 Network Investigations (CONI) Alliance                                                                                                                                                                  | Kamolthip Atsawawaranunt et al |
| EPI_ISL_882799 | Office of Diseases Prevention and Control Region 4 Saraburi            | COVID-19 Network Investigations (CONI) Alliance                                                                                                                                                                  | Kamolthip Atsawawaranunt et al |
| EPI_ISL_445380 | Ramathibodi Hospital                                                   | COVID-19 Network Investigations (CONI) Alliance                                                                                                                                                                  | Elizabeth Batty et al          |
| EPI_ISL_447018 | Ramathibodi Hospital                                                   | COVID-19 Network Investigations (CONI) Alliance                                                                                                                                                                  | Elizabeth Batty et al          |
| EPI_ISL_447019 | Ramathibodi Hospital                                                   | COVID-19 Network Investigations (CONI) Alliance                                                                                                                                                                  | Elizabeth Batty et al          |
| EPI_ISL_447022 | Ramathibodi Hospital                                                   | COVID-19 Network Investigations (CONI) Alliance                                                                                                                                                                  | Elizabeth Batty et al          |
| EPI_ISL_447027 | Ramathibodi Hospital                                                   | COVID-19 Network Investigations (CONI) Alliance                                                                                                                                                                  | Elizabeth Batty et al          |
| EPI_ISL_708815 | Urban Institute for Disease Prevention and Control                     | National Institute of Health, Department of Medical Sciences, Ministry of Public Health, Thailand                                                                                                                | Pilailuk Okada et al           |
| EPI_ISL_708818 | Urban Institute for Disease Prevention and Control                     | National Institute of Health, Department of Medical Sciences, Ministry of Public Health, Thailand                                                                                                                | Pilailuk Okada et al           |
| EPI_ISL_708816 | Urban Institute for Disease Prevention and Control                     | National Institute of Health, Department of Medical Sciences, Ministry of Public Health, Thailand                                                                                                                | Pilailuk Okada et al           |
| EPI_ISL_708817 | Urban Institute for Disease Prevention and Control                     | National Institute of Health, Department of Medical Sciences, Ministry of Public Health, Thailand                                                                                                                | Pilailuk Okada et al           |
| EPI_ISL_708820 | Vajira Hospital                                                        | National Institute of Health, Department of Medical Sciences, Ministry of Public Health, Thailand                                                                                                                | Pilailuk Okada et al           |
| EPI_ISL_458028 | Hospital for Tropical Diseases                                         | COVID-19 Network Investigations (CONI) Alliance                                                                                                                                                                  | Elizabeth Batty et al          |
| EPI_ISL_455919 | Ramathibodi Hospital                                                   | COVID-19 Network Investigations (CONI) Alliance                                                                                                                                                                  | Elizabeth Batty et al          |
| EPI_ISL_455920 | Ramathibodi Hospital                                                   | COVID-19 Network Investigations (CONI) Alliance                                                                                                                                                                  | Elizabeth Batty et al          |
| EPI_ISL_455921 | Ramathibodi Hospital                                                   | COVID-19 Network Investigations (CONI) Alliance                                                                                                                                                                  | Elizabeth Batty et al          |
| EPI_ISL_455922 | Ramathibodi Hospital                                                   | COVID-19 Network Investigations (CONI) Alliance                                                                                                                                                                  | Elizabeth Batty et al          |
| EPI_ISL_498257 | Hospital for Tropical Diseases                                         | COVID-19 Network Investigations (CONI) Alliance                                                                                                                                                                  | Elizabeth Batty et al          |
| EPI_ISL_498260 | Hospital for Tropical Diseases                                         | COVID-19 Network Investigations (CONI) Alliance                                                                                                                                                                  | Elizabeth Batty et al          |

|                |                                                                                                                                          |                                                                                                      |                                |
|----------------|------------------------------------------------------------------------------------------------------------------------------------------|------------------------------------------------------------------------------------------------------|--------------------------------|
| EPI_ISL_512872 | Ramathibodi Hospital                                                                                                                     | COVID-19 Network Investigations (CONI) Alliance                                                      | Elizabeth Batty et al          |
| EPI_ISL_707707 | Institute for Urban Disease Control and Prevention                                                                                       | COVID-19 Network Investigations (CONI) Alliance                                                      | Kamolthip Atsawawaranunt et al |
| EPI_ISL_707709 | Hospital for Tropical Diseases                                                                                                           | COVID-19 Network Investigations (CONI) Alliance                                                      | Elizabeth Batty et al          |
| EPI_ISL_707710 | Hospital for Tropical Diseases                                                                                                           | COVID-19 Network Investigations (CONI) Alliance                                                      | Elizabeth Batty et al          |
| EPI_ISL_882784 | Institute for Urban Disease Control and Prevention                                                                                       | COVID-19 Network Investigations (CONI) Alliance                                                      | Kamolthip Atsawawaranunt et al |
| EPI_ISL_882775 | Institute for Urban Disease Control and Prevention                                                                                       | COVID-19 Network Investigations (CONI) Alliance                                                      | Kamolthip Atsawawaranunt et al |
| EPI_ISL_882785 | Institute for Urban Disease Control and Prevention                                                                                       | COVID-19 Network Investigations (CONI) Alliance                                                      | Kamolthip Atsawawaranunt et al |
| EPI_ISL_882776 | Institute for Urban Disease Control and Prevention                                                                                       | COVID-19 Network Investigations (CONI) Alliance                                                      | Kamolthip Atsawawaranunt et al |
| EPI_ISL_882778 | Institute for Urban Disease Control and Prevention                                                                                       | COVID-19 Network Investigations (CONI) Alliance                                                      | Kamolthip Atsawawaranunt et al |
| EPI_ISL_708813 | World Medical Hospital                                                                                                                   | National Institute of Health, Department of Medical Sciences, Ministry of Public Health, Thailand    | Pilailuk Okada et al           |
| EPI_ISL_708822 | Emergency Operation Center, (EOC)                                                                                                        | National Institute of Health, Department of Medical Sciences, Ministry of Public Health, Thailand    | Pilailuk Okada et al           |
| EPI_ISL_708812 | World Medical Hospital                                                                                                                   | National Institute of Health, Department of Medical Sciences, Ministry of Public Health, Thailand    | Pilailuk Okada et al           |
| EPI_ISL_708821 | Synphaet Hospital                                                                                                                        | National Institute of Health, Department of Medical Sciences, Ministry of Public Health, Thailand    | Pilailuk Okada et al           |
| EPI_ISL_708823 | Vibharam Hospital                                                                                                                        | National Institute of Health, Department of Medical Sciences, Ministry of Public Health, Thailand    | Pilailuk Okada et al           |
| EPI_ISL_447920 | n/a                                                                                                                                      | National Institute of Health, Department of medical Sciences, Ministry of Public Health, Thailand    | Pilailuk et al                 |
| EPI_ISL_447915 | n/a                                                                                                                                      | National Institute of Health, Department of medical Sciences, Ministry of Public Health, Thailand    | Pilailuk et al                 |
| EPI_ISL_447916 | n/a                                                                                                                                      | National Institute of Health, Department of medical Sciences, Ministry of Public Health, Thailand    | Pilailuk et al                 |
| EPI_ISL_447918 | n/a                                                                                                                                      | National Institute of Health, Department of medical Sciences, Ministry of Public Health, Thailand    | Pilailuk et al                 |
| EPI_ISL_937535 | Thai Red Cross Emerging Infectious Diseases Health Science Centre, Chulalongkorn Hospital, Faculty of Medicine, Chulalongkorn University | Thai Red Cross Emerging Infectious Diseases Center and Faculty of Medicine, Chulalongkorn University | Opass Putcharoen et al         |
| EPI_ISL_937532 | Thai Red Cross Emerging Infectious Diseases Health Science Centre, Chulalongkorn Hospital, Faculty of Medicine, Chulalongkorn University | Thai Red Cross Emerging Infectious Diseases Center and Faculty of Medicine, Chulalongkorn University | Opass Putcharoen et al         |
| EPI_ISL_976906 | Thai Red Cross Emerging Infectious Diseases Health Science Centre, Chulalongkorn Hospital, Faculty of Medicine, Chulalongkorn University | Thai Red Cross Emerging Infectious Diseases Center and Faculty of Medicine, Chulalongkorn University | Opass Putcharoen et al         |
| EPI_ISL_937536 | Thai Red Cross Emerging Infectious Diseases Health Science Centre, Chulalongkorn Hospital, Faculty of Medicine, Chulalongkorn University | Thai Red Cross Emerging Infectious Diseases Center and Faculty of Medicine, Chulalongkorn University | Opass Putcharoen et al         |
| EPI_ISL_937538 | Thai Red Cross Emerging Infectious Diseases Health Science Centre, Chulalongkorn Hospital, Faculty of Medicine, Chulalongkorn University | Thai Red Cross Emerging Infectious Diseases Center and Faculty of Medicine, Chulalongkorn University | Opass Putcharoen et al         |
| EPI_ISL_937537 | Thai Red Cross Emerging Infectious Diseases Health Science Centre, Chulalongkorn Hospital, Faculty of Medicine, Chulalongkorn University | Thai Red Cross Emerging Infectious Diseases Center and Faculty of Medicine, Chulalongkorn University | Opass Putcharoen et al         |
| EPI_ISL_976907 | Thai Red Cross Emerging Infectious Diseases Health Science Centre, Chulalongkorn Hospital, Faculty of Medicine, Chulalongkorn University | Thai Red Cross Emerging Infectious Diseases Center and Faculty of Medicine, Chulalongkorn University | Opass Putcharoen et al         |



|                |                                                                                                   |                                                                                                   |                                |
|----------------|---------------------------------------------------------------------------------------------------|---------------------------------------------------------------------------------------------------|--------------------------------|
| EPI_ISL_768610 | Regional medical sciences center 6 Chonburi                                                       | National Institute of Health, Department of Medical Sciences, Ministry of Public Health, Thailand | Pilailuk Okada et al           |
| EPI_ISL_768611 | Regional medical sciences center 6 Chonburi                                                       | National Institute of Health, Department of Medical Sciences, Ministry of Public Health, Thailand | Pilailuk Okada et al           |
| EPI_ISL_493137 | Center for Research and Innovation, Faculty of Medical Technology, Mahidol University             | Center for Research and Innovation, Faculty of Medical Technology, Mahidol University             | Kantima Sangsiriwut et al      |
| EPI_ISL_434692 | Bamrasnaradura hospital                                                                           | National Institute of Health. Department of medical Sciences, Ministry of Public Health, Thailand | Pilailuk et al                 |
| EPI_ISL_434694 | Bamrasnaradura hospital                                                                           | National Institute of Health. Department of medical Sciences, Ministry of Public Health, Thailand | Pilailuk et al                 |
| EPI_ISL_434693 | Bamrasnaradura hospital                                                                           | National Institute of Health. Department of medical Sciences, Ministry of Public Health, Thailand | Pilailuk et al                 |
| EPI_ISL_450197 | National Institute of Health. Department of medical Sciences, Ministry of Public Health, Thailand | National Institute of Health. Department of medical Sciences, Ministry of Public Health, Thailand | Pilailuk et al                 |
| EPI_ISL_447917 | n/a                                                                                               | National Institute of Health. Department of medical Sciences, Ministry of Public Health, Thailand | Pilailuk et al                 |
| EPI_ISL_447909 | n/a                                                                                               | National Institute of Health. Department of medical Sciences, Ministry of Public Health, Thailand | Pilailuk et al                 |
| EPI_ISL_447910 | n/a                                                                                               | National Institute of Health. Department of medical Sciences, Ministry of Public Health, Thailand | Pilailuk et al                 |
| EPI_ISL_447914 | n/a                                                                                               | National Institute of Health. Department of medical Sciences, Ministry of Public Health, Thailand | Pilailuk et al                 |
| EPI_ISL_437623 | unknown                                                                                           | Faculty of Medicine                                                                               | Rodpan et al                   |
| EPI_ISL_437622 | unknown                                                                                           | Faculty of Medicine                                                                               | Rodpan et al                   |
| EPI_ISL_437621 | unknown                                                                                           | Faculty of Medicine                                                                               | Rodpan et al                   |
| EPI_ISL_437619 | unknown                                                                                           | Faculty of Medicine                                                                               | Rodpan et al                   |
| EPI_ISL_437624 | unknown                                                                                           | Faculty of Medicine                                                                               | Rodpan et al                   |
| EPI_ISL_437617 | unknown                                                                                           | Faculty of Medicine                                                                               | Rodpan et al                   |
| EPI_ISL_437616 | unknown                                                                                           | Faculty of Medicine                                                                               | Rodpan et al                   |
| EPI_ISL_437615 | unknown                                                                                           | Faculty of Medicine                                                                               | Rodpan et al                   |
| EPI_ISL_437614 | unknown                                                                                           | Faculty of Medicine                                                                               | Rodpan et al                   |
| EPI_ISL_437613 | unknown                                                                                           | Faculty of Medicine                                                                               | Rodpan et al                   |
| EPI_ISL_733542 | Institute for Urban Disease Control and Prevention                                                | COVID-19 Network Investigations (CONI) Alliance                                                   | Kamolthip Atsawawaranunt et al |
| EPI_ISL_733548 | Institute for Urban Disease Control and Prevention                                                | COVID-19 Network Investigations (CONI) Alliance                                                   | Kamolthip Atsawawaranunt et al |
| EPI_ISL_733566 | Institute for Urban Disease Control and Prevention                                                | COVID-19 Network Investigations (CONI) Alliance                                                   | Kamolthip Atsawawaranunt et al |
| EPI_ISL_812939 | Institute for Urban Disease Control and Prevention                                                | COVID-19 Network Investigations (CONI) Alliance                                                   | Kamolthip Atsawawaranunt et al |
| EPI_ISL_812944 | Institute for Urban Disease Control and Prevention                                                | COVID-19 Network Investigations (CONI) Alliance                                                   | Kamolthip Atsawawaranunt et al |
| EPI_ISL_812949 | Institute for Urban Disease Control and Prevention                                                | COVID-19 Network Investigations (CONI) Alliance                                                   | Kamolthip Atsawawaranunt et al |
| EPI_ISL_812954 | Institute for Urban Disease Control and Prevention                                                | COVID-19 Network Investigations (CONI) Alliance                                                   | Kamolthip Atsawawaranunt et al |
| EPI_ISL_768531 | Regional Medical Sciences Center 5 Samut Songkhram                                                | National Institute of Health, Department of Medical Sciences, Ministry of Public Health, Thailand | Pilailuk Okada et al           |
| EPI_ISL_447919 | n/a                                                                                               | National Institute of Health. Department of medical Sciences, Ministry of Public Health, Thailand | Pilailuk et al                 |
| EPI_ISL_708811 | Regional medical sciences center 2 Phitsanulok                                                    | National Institute of Health, Department of Medical Sciences, Ministry of Public Health, Thailand | Pilailuk Okada et al           |



|                |                                                                             |                                                                                                                    |                            |
|----------------|-----------------------------------------------------------------------------|--------------------------------------------------------------------------------------------------------------------|----------------------------|
| EPI_ISL_708810 | Regional medical sciences center 2 Phitsanulok                              | National Institute of Health, Department of Medical Sciences, Ministry of Public Health, Thailand                  | Pilailuk Okada et al       |
| EPI_ISL_456597 | National Health Laboratory, Timor-Leste                                     | Microbiological Diagnostic Unit Public Health Laboratory, The Peter Doherty Institute for Infection and Immunity   | Soares da Silva et al      |
| EPI_ISL_456606 | National Health Laboratory, Timor-Leste                                     | Microbiological Diagnostic Unit Public Health Laboratory, The Peter Doherty Institute for Infection and Immunity   | Soares da Silva et al      |
| EPI_ISL_456601 | National Health Laboratory, Timor-Leste                                     | Microbiological Diagnostic Unit Public Health Laboratory, The Peter Doherty Institute for Infection and Immunity   | Soares da Silva et al      |
| EPI_ISL_456602 | National Health Laboratory, Timor-Leste                                     | Microbiological Diagnostic Unit Public Health Laboratory, The Peter Doherty Institute for Infection and Immunity   | Soares da Silva et al      |
| EPI_ISL_456608 | National Health Laboratory, Timor-Leste                                     | Microbiological Diagnostic Unit Public Health Laboratory, The Peter Doherty Institute for Infection and Immunity   | Soares da Silva et al      |
| EPI_ISL_456610 | National Health Laboratory, Timor-Leste                                     | Microbiological Diagnostic Unit Public Health Laboratory, The Peter Doherty Institute for Infection and Immunity   | Soares da Silva et al      |
| EPI_ISL_456599 | National Health Laboratory, Timor-Leste                                     | Microbiological Diagnostic Unit Public Health Laboratory, The Peter Doherty Institute for Infection and Immunity   | Soares da Silva et al      |
| EPI_ISL_456607 | National Health Laboratory, Timor-Leste                                     | Microbiological Diagnostic Unit Public Health Laboratory, The Peter Doherty Institute for Infection and Immunity   | Soares da Silva et al      |
| EPI_ISL_456612 | National Health Laboratory, Timor-Leste                                     | Microbiological Diagnostic Unit Public Health Laboratory, The Peter Doherty Institute for Infection and Immunity   | Soares da Silva et al      |
| EPI_ISL_456611 | National Health Laboratory, Timor-Leste                                     | Microbiological Diagnostic Unit Public Health Laboratory, The Peter Doherty Institute for Infection and Immunity   | Soares da Silva et al      |
| EPI_ISL_456600 | National Health Laboratory, Timor-Leste                                     | Microbiological Diagnostic Unit Public Health Laboratory, The Peter Doherty Institute for Infection and Immunity   | Soares da Silva et al      |
| EPI_ISL_717694 | Trinidad Public Health Laboratory                                           | Carrington Lab, Department of PreClinical Sciences, Faculty of Medical Sciences, The University of the West Indies | Nikita S. D. Sahadeo et al |
| EPI_ISL_756362 | Trinidad Public Health Laboratory                                           | Carrington Lab, Department of PreClinical Sciences, Faculty of Medical Sciences, The University of the West Indies | Nikita S. D. Sahadeo et al |
| EPI_ISL_717695 | Trinidad Public Health Laboratory                                           | Carrington Lab, Department of PreClinical Sciences, Faculty of Medical Sciences, The University of the West Indies | Nikita S. D. Sahadeo et al |
| EPI_ISL_717699 | Trinidad Public Health Laboratory                                           | Carrington Lab, Department of PreClinical Sciences, Faculty of Medical Sciences, The University of the West Indies | Nikita S. D. Sahadeo et al |
| EPI_ISL_756311 | The Caribbean Public Health Agency                                          | Carrington Lab, Department of PreClinical Sciences, Faculty of Medical Sciences, The University of the West Indies | Nikita S. D. Sahadeo et al |
| EPI_ISL_756357 | The Caribbean Public Health Agency                                          | Carrington Lab, Department of PreClinical Sciences, Faculty of Medical Sciences, The University of the West Indies | Nikita S. D. Sahadeo et al |
| EPI_ISL_717697 | Trinidad Public Health Laboratory                                           | Carrington Lab, Department of PreClinical Sciences, Faculty of Medical Sciences, The University of the West Indies | Nikita S. D. Sahadeo et al |
| EPI_ISL_756363 | Trinidad Public Health Laboratory                                           | Carrington Lab, Department of PreClinical Sciences, Faculty of Medical Sciences, The University of the West Indies | Nikita S. D. Sahadeo et al |
| EPI_ISL_717692 | Trinidad Public Health Laboratory                                           | Carrington Lab, Department of PreClinical Sciences, Faculty of Medical Sciences, The University of the West Indies | Nikita S. D. Sahadeo et al |
| EPI_ISL_717696 | Trinidad Public Health Laboratory                                           | Carrington Lab, Department of PreClinical Sciences, Faculty of Medical Sciences, The University of the West Indies | Nikita S. D. Sahadeo et al |
| EPI_ISL_717700 | Trinidad Public Health Laboratory                                           | Carrington Lab, Department of PreClinical Sciences, Faculty of Medical Sciences, The University of the West Indies | Nikita S. D. Sahadeo et al |
| EPI_ISL_717698 | Trinidad Public Health Laboratory                                           | Carrington Lab, Department of PreClinical Sciences, Faculty of Medical Sciences, The University of the West Indies | Nikita S. D. Sahadeo et al |
| EPI_ISL_855561 | Department of Virology, Principal Military Hospital of Instruction of Tunis | Bundeswehr Institute of Microbiology                                                                               | Susann Handrick et al      |
| EPI_ISL_855569 | Department of Virology, Principal Military Hospital of Instruction of Tunis | Bundeswehr Institute of Microbiology                                                                               | Susann Handrick et al      |





|                |                                                                                                                                                                       |                                                                                                                                                                                                                                                                                                                  |                                  |
|----------------|-----------------------------------------------------------------------------------------------------------------------------------------------------------------------|------------------------------------------------------------------------------------------------------------------------------------------------------------------------------------------------------------------------------------------------------------------------------------------------------------------|----------------------------------|
| EPI_ISL_699655 | 1-Laboratory of Microbiology, National Reference Lab, Charles Nicolle Hospital; 2-University of Tunis ElManar, Faculty of Medicine of Tunis, LR99ES09, Tunis, Tunisia | National Center of Pharmacovigilance, University of Tunis El Manar, Tunis, Tunisia. 2-Neurodegenerative diseases and psychiatric troubles, LR18SP03, Razi Hospital, University of Tunis El Manar, Tunis, Tunisia. 3- Ministry of Health, National Observatory of New and Emerging Diseases, 1006, Tunis, Tunisia | Ilhem Boutiba-Ben Boubaker et al |
| EPI_ISL_733499 | 1-Laboratory of Microbiology, National Reference Lab, Charles Nicolle Hospital; 2-University of Tunis ElManar, Faculty of Medicine of Tunis, LR99ES09, Tunis, Tunisia | National Center of Pharmacovigilance, University of Tunis El Manar, Tunis, Tunisia. 2-Neurodegenerative diseases and psychiatric troubles, LR18SP03, Razi Hospital, University of Tunis El Manar, Tunis, Tunisia. 3- Ministry of Health, National Observatory of New and Emerging Diseases, 1006, Tunis, Tunisia | Ilhem Boutiba-Ben Boubaker et al |
| EPI_ISL_707792 | 1-Laboratory of Microbiology, National Reference Lab, Charles Nicolle Hospital; 2-University of Tunis ElManar, Faculty of Medicine of Tunis, LR99ES09, Tunis, Tunisia | National Center of Pharmacovigilance, University of Tunis El Manar, Tunis, Tunisia. 2-Neurodegenerative diseases and psychiatric troubles, LR18SP03, Razi Hospital, University of Tunis El Manar, Tunis, Tunisia. 3- Ministry of Health, National Observatory of New and Emerging Diseases, 1006, Tunis, Tunisia | Ilhem Boutiba-Ben Boubaker et al |
| EPI_ISL_763065 | 1-Laboratory of Microbiology, National Reference Lab, Charles Nicolle Hospital; 2-University of Tunis ElManar, Faculty of Medicine of Tunis, LR99ES09, Tunis, Tunisia | National Center of Pharmacovigilance, University of Tunis El Manar, Tunis, Tunisia. 2-Neurodegenerative diseases and psychiatric troubles, LR18SP03, Razi Hospital, University of Tunis El Manar, Tunis, Tunisia. 3- Ministry of Health, National Observatory of New and Emerging Diseases, 1006, Tunis, Tunisia | Ilhem Boutiba-Ben Boubaker et al |
| EPI_ISL_796782 | Laboratory of Microbiology, National Reference Lab, Charles Nicolle Hospital; 2-University of Tunis ElManar, Faculty of Medicine of Tunis, LR99ES09, Tunis, Tunisia   | National Center of Pharmacovigilance, University of Tunis El Manar, Tunis, Tunisia. 2-Neurodegenerative diseases and psychiatric troubles, LR18SP03, Razi Hospital, University of Tunis El Manar, Tunis, Tunisia. 3- Ministry of Health, National Observatory of New and Emerging Diseases, 1006, Tunis, Tunisia | Ilhem Boutiba-Ben Boubaker et al |
| EPI_ISL_763067 | 1-Laboratory of Microbiology, National Reference Lab, Charles Nicolle Hospital; 2-University of Tunis ElManar, Faculty of Medicine of Tunis, LR99ES09, Tunis, Tunisia | National Center of Pharmacovigilance, University of Tunis El Manar, Tunis, Tunisia. 2-Neurodegenerative diseases and psychiatric troubles, LR18SP03, Razi Hospital, University of Tunis El Manar, Tunis, Tunisia. 3- Ministry of Health, National Observatory of New and Emerging Diseases, 1006, Tunis, Tunisia | Ilhem Boutiba-Ben Boubaker et al |
| EPI_ISL_707793 | 1-Laboratory of Microbiology, National Reference Lab, Charles Nicolle Hospital; 2-University of Tunis ElManar, Faculty of Medicine of Tunis, LR99ES09, Tunis, Tunisia | National Center of Pharmacovigilance, University of Tunis El Manar, Tunis, Tunisia. 2-Neurodegenerative diseases and psychiatric troubles, LR18SP03, Razi Hospital, University of Tunis El Manar, Tunis, Tunisia. 3- Ministry of Health, National Observatory of New and Emerging Diseases, 1006, Tunis, Tunisia | Ilhem Boutiba-Ben Boubaker et al |
| EPI_ISL_712568 | Laboratoire de Microbiologie- CHU Habib Bourguiba – Sfax adresse                                                                                                      | Laboratoire des Procédés de Criblage Moléculaire et Cellulaire-Centre de Biotechnologie de Sfax                                                                                                                                                                                                                  | Souissi et al                    |
| EPI_ISL_710575 | Hôpital Fattouma-Bourguiba de Monastir                                                                                                                                | Laboratoire des Procédés de Criblage Moléculaire et Cellulaire-Centre de Biotechnologie de Sfax                                                                                                                                                                                                                  | Souissi et al                    |
| EPI_ISL_710537 | Hôpital Fattouma-Bourguiba de Monastir                                                                                                                                | Laboratoire des Procédés de Criblage Moléculaire et Cellulaire-Centre de Biotechnologie de Sfax                                                                                                                                                                                                                  | Souissi et al                    |
| EPI_ISL_710534 | Hôpital Fattouma-Bourguiba de Monastir                                                                                                                                | Laboratoire des Procédés de Criblage Moléculaire et Cellulaire-Centre de Biotechnologie de Sfax                                                                                                                                                                                                                  | Souissi et al                    |
| EPI_ISL_710540 | Hôpital Fattouma-Bourguiba de Monastir                                                                                                                                | Laboratoire des Procédés de Criblage Moléculaire et Cellulaire-Centre de Biotechnologie de Sfax                                                                                                                                                                                                                  | Souissi et al                    |
| EPI_ISL_710541 | Hôpital Fattouma-Bourguiba de Monastir                                                                                                                                | Laboratoire des Procédés de Criblage Moléculaire et Cellulaire-Centre de Biotechnologie de Sfax                                                                                                                                                                                                                  | Souissi et al                    |
| EPI_ISL_711057 | Hôpital Fattouma-Bourguiba de Monastir                                                                                                                                | Laboratoire des Procédés de Criblage Moléculaire et Cellulaire-Centre de Biotechnologie de Sfax                                                                                                                                                                                                                  | Souissi et al                    |
| EPI_ISL_712060 | Hôpital Fattouma-Bourguiba de Monastir                                                                                                                                | Laboratoire des Procédés de Criblage Moléculaire et Cellulaire-Centre de Biotechnologie de Sfax                                                                                                                                                                                                                  | Souissi et al                    |
| EPI_ISL_712064 | Laboratoire de Microbiologie- CHU Habib Bourguiba – Sfax adresse                                                                                                      | Laboratoire des Procédés de Criblage Moléculaire et Cellulaire-Centre de Biotechnologie de Sfax                                                                                                                                                                                                                  | Souissi et al                    |

|                |                                                                  |                                                                                                     |                          |
|----------------|------------------------------------------------------------------|-----------------------------------------------------------------------------------------------------|--------------------------|
| EPI_ISL_712066 | Laboratoire de Microbiologie- CHU Habib Bourguiba – Sfax adresse | Laboratoire des Procédés de Criblage Moléculaire et Cellulaire-<br>Centre de Biotechnologie de Sfax | Souissi et al            |
| EPI_ISL_463001 | unknown                                                          | Clinical virology                                                                                   | Fares et al              |
| EPI_ISL_463005 | unknown                                                          | Clinical virology                                                                                   | Fares et al              |
| EPI_ISL_463002 | unknown                                                          | Clinical virology                                                                                   | Fares et al              |
| EPI_ISL_463003 | unknown                                                          | Clinical virology                                                                                   | Fares et al              |
| EPI_ISL_463006 | unknown                                                          | Clinical virology                                                                                   | Fares et al              |
| EPI_ISL_463004 | unknown                                                          | Clinical virology                                                                                   | Fares et al              |
| EPI_ISL_458285 | unknown                                                          | Bundeswehr Institute of Microbiology                                                                | Handrick et al           |
| EPI_ISL_458286 | unknown                                                          | Bundeswehr Institute of Microbiology                                                                | Handrick et al           |
| EPI_ISL_984743 | Gazi University Faculty of Medicine, Medical Virology Laboratory | Gazi University Faculty of Medicine, Medical Virology Laboratory                                    | Erdem Şahin et al        |
| EPI_ISL_984987 | Gazi University Faculty of Medicine, Medical Virology Laboratory | Gazi University Faculty of Medicine, Medical Virology Laboratory                                    | Erdem Şahin et al        |
| EPI_ISL_984742 | Gazi University Faculty of Medicine, Medical Virology Laboratory | Gazi University Faculty of Medicine, Medical Virology Laboratory                                    | Erdem Şahin et al        |
| EPI_ISL_984749 | Gazi University Faculty of Medicine, Medical Virology Laboratory | Gazi University Faculty of Medicine, Medical Virology Laboratory                                    | Erdem Şahin et al        |
| EPI_ISL_984750 | Gazi University Faculty of Medicine, Medical Virology Laboratory | Gazi University Faculty of Medicine, Medical Virology Laboratory                                    | Erdem Şahin et al        |
| EPI_ISL_984751 | Gazi University Faculty of Medicine, Medical Virology Laboratory | Gazi University Faculty of Medicine, Medical Virology Laboratory                                    | Erdem Şahin et al        |
| EPI_ISL_984739 | Gazi University Faculty of Medicine, Medical Virology Laboratory | Gazi University Faculty of Medicine, Medical Virology Laboratory                                    | Erdem Şahin et al        |
| EPI_ISL_984741 | Gazi University Faculty of Medicine, Medical Virology Laboratory | Gazi University Faculty of Medicine, Medical Virology Laboratory                                    | Erdem Şahin et al        |
| EPI_ISL_984994 | Gazi University Faculty of Medicine, Medical Virology Laboratory | Gazi University Faculty of Medicine, Medical Virology Laboratory                                    | Erdem Şahin et al        |
| EPI_ISL_730575 | Gazi University Faculty of Medicine, Medical Virology Laboratory | Gazi University Faculty of Medicine, Medical Virology Laboratory                                    | Erdem Şahin et al        |
| EPI_ISL_730571 | Gazi University Faculty of Medicine, Medical Virology Laboratory | Gazi University Faculty of Medicine, Medical Virology Laboratory                                    | Erdem Şahin et al        |
| EPI_ISL_730568 | Gazi University Faculty of Medicine, Medical Virology Laboratory | Gazi University Faculty of Medicine, Medical Virology Laboratory                                    | Erdem Şahin et al        |
| EPI_ISL_730573 | Gazi University Faculty of Medicine, Medical Virology Laboratory | Gazi University Faculty of Medicine, Medical Virology Laboratory                                    | Erdem Şahin et al        |
| EPI_ISL_730569 | Gazi University Faculty of Medicine, Medical Virology Laboratory | Gazi University Faculty of Medicine, Medical Virology Laboratory                                    | Erdem Şahin et al        |
| EPI_ISL_730570 | Gazi University Faculty of Medicine, Medical Virology Laboratory | Gazi University Faculty of Medicine, Medical Virology Laboratory                                    | Erdem Şahin et al        |
| EPI_ISL_730620 | Gazi University Faculty of Medicine, Medical Virology Laboratory | Gazi University Faculty of Medicine, Medical Virology Laboratory                                    | Erdem Şahin et al        |
| EPI_ISL_730577 | Gazi University Faculty of Medicine, Medical Virology Laboratory | Gazi University Faculty of Medicine, Medical Virology Laboratory                                    | Erdem Şahin et al        |
| EPI_ISL_707938 | Pamukkale University Hospital                                    | Pamukkale University Department of Medical Genetics                                                 | Onur TOKGUN et al. et al |
| EPI_ISL_707939 | Pamukkale University Hospital                                    | Pamukkale University Department of Medical Genetics                                                 | Onur TOKGUN et al. et al |
| EPI_ISL_708184 | Pamukkale University Hospital                                    | Pamukkale University Department of Medical Genetics                                                 | Onur TOKGUN et al. et al |
| EPI_ISL_708186 | Pamukkale University Hospital                                    | Pamukkale University Department of Medical Genetics                                                 | Onur TOKGUN et al. et al |
| EPI_ISL_708188 | Pamukkale University Hospital                                    | Pamukkale University Department of Medical Genetics                                                 | Onur TOKGUN et al. et al |
| EPI_ISL_708189 | Pamukkale University Hospital                                    | Pamukkale University Department of Medical Genetics                                                 | Onur TOKGUN et al. et al |
| EPI_ISL_708190 | Pamukkale University Hospital                                    | Pamukkale University Department of Medical Genetics                                                 | Onur TOKGUN et al. et al |
| EPI_ISL_708191 | Pamukkale University Hospital                                    | Pamukkale University Department of Medical Genetics                                                 | Onur TOKGUN et al. et al |
| EPI_ISL_708195 | Pamukkale University Hospital                                    | Pamukkale University Department of Medical Genetics                                                 | Onur TOKGUN et al. et al |
| EPI_ISL_708192 | Pamukkale University Hospital                                    | Pamukkale University Department of Medical Genetics                                                 | Onur TOKGUN et al. et al |
| EPI_ISL_708193 | Pamukkale University Hospital                                    | Pamukkale University Department of Medical Genetics                                                 | Onur TOKGUN et al. et al |
| EPI_ISL_708194 | Pamukkale University Hospital                                    | Pamukkale University Department of Medical Genetics                                                 | Onur TOKGUN et al. et al |
| EPI_ISL_730567 | Gazi University Faculty of Medicine, Medical Virology Laboratory | Gazi University Faculty of Medicine, Medical Virology Laboratory                                    | Erdem Şahin et al        |

|                |                                                                                                              |                                                          |                       |
|----------------|--------------------------------------------------------------------------------------------------------------|----------------------------------------------------------|-----------------------|
| EPI_ISL_429871 | Ministry of Health Turkey                                                                                    | Ministry of Health Turkey                                | Fatma Bayrakdar et al |
| EPI_ISL_812775 | Ministry of Health Turkey                                                                                    | Ministry of Health Turkey                                | Fatma Bayrakdar et al |
| EPI_ISL_812776 | Ministry of Health Turkey                                                                                    | Ministry of Health Turkey                                | Fatma Bayrakdar et al |
| EPI_ISL_812763 | Ministry of Health Turkey                                                                                    | Ministry of Health Turkey                                | Fatma Bayrakdar et al |
| EPI_ISL_812764 | Ministry of Health Turkey                                                                                    | Ministry of Health Turkey                                | Fatma Bayrakdar et al |
| EPI_ISL_811137 | Ministry of Health Turkey                                                                                    | Ministry of Health Turkey                                | Fatma Bayrakdar et al |
| EPI_ISL_811138 | Ministry of Health Turkey                                                                                    | Ministry of Health Turkey                                | Fatma Bayrakdar et al |
| EPI_ISL_812769 | Ministry of Health Turkey                                                                                    | Ministry of Health Turkey                                | Fatma Bayrakdar et al |
| EPI_ISL_811139 | Ministry of Health Turkey                                                                                    | Ministry of Health Turkey                                | Fatma Bayrakdar et al |
| EPI_ISL_812771 | Ministry of Health Turkey                                                                                    | Ministry of Health Turkey                                | Fatma Bayrakdar et al |
| EPI_ISL_811140 | Ministry of Health Turkey                                                                                    | Ministry of Health Turkey                                | Fatma Bayrakdar et al |
| EPI_ISL_811141 | Ministry of Health Turkey                                                                                    | Ministry of Health Turkey                                | Fatma Bayrakdar et al |
| EPI_ISL_811142 | Ministry of Health Turkey                                                                                    | Ministry of Health Turkey                                | Fatma Bayrakdar et al |
| EPI_ISL_894263 | Ministry of Health Turkey                                                                                    | Ministry of Health Turkey                                | Fatma Bayrakdar et al |
| EPI_ISL_935064 | Ministry of Health Turkey                                                                                    | Ministry of Health Turkey                                | Fatma Bayrakdar et al |
| EPI_ISL_437327 | Ministry of Health Turkey                                                                                    | Ministry of Health Turkey                                | Fatma Bayrakdar et al |
| EPI_ISL_940647 | Ministry of Health Turkey                                                                                    | Ministry of Health Turkey                                | Fatma Bayrakdar et al |
| EPI_ISL_437320 | Ministry of Health Turkey                                                                                    | Ministry of Health Turkey                                | Fatma Bayrakdar et al |
| EPI_ISL_437321 | Ministry of Health Turkey                                                                                    | Ministry of Health Turkey                                | Fatma Bayrakdar et al |
| EPI_ISL_983415 | Ministry of Health Turkey                                                                                    | Ministry of Health Turkey                                | Fatma Bayrakdar et al |
| EPI_ISL_983416 | Ministry of Health Turkey                                                                                    | Ministry of Health Turkey                                | Fatma Bayrakdar et al |
| EPI_ISL_812882 | Ministry of Health Turkey                                                                                    | Ministry of Health Turkey                                | Fatma Bayrakdar et al |
| EPI_ISL_812873 | Ministry of Health Turkey                                                                                    | Ministry of Health Turkey                                | Fatma Bayrakdar et al |
| EPI_ISL_814075 | Ministry of Health Turkey                                                                                    | Ministry of Health Turkey                                | Fatma Bayrakdar et al |
| EPI_ISL_814091 | Ministry of Health Turkey                                                                                    | Ministry of Health Turkey                                | Fatma Bayrakdar et al |
| EPI_ISL_814062 | Ministry of Health Turkey                                                                                    | Ministry of Health Turkey                                | Fatma Bayrakdar et al |
| EPI_ISL_814063 | Ministry of Health Turkey                                                                                    | Ministry of Health Turkey                                | Fatma Bayrakdar et al |
| EPI_ISL_429866 | Ministry of Health Turkey                                                                                    | Ministry of Health Turkey                                | Fatma Bayrakdar et al |
| EPI_ISL_429867 | Ministry of Health Turkey                                                                                    | Ministry of Health Turkey                                | Fatma Bayrakdar et al |
| EPI_ISL_428714 | Ministry of Health Turkey                                                                                    | Ministry of Health Turkey                                | Fatma Bayrakdar et al |
| EPI_ISL_437304 | Ministry of Health Turkey                                                                                    | Ministry of Health Turkey                                | Fatma Bayrakdar et al |
| EPI_ISL_428719 | Ministry of Health Turkey                                                                                    | Ministry of Health Turkey                                | Fatma Bayrakdar et al |
| EPI_ISL_437315 | Ministry of Health Turkey                                                                                    | Ministry of Health Turkey                                | Fatma Bayrakdar et al |
| EPI_ISL_812895 | Ministry of Health Turkey                                                                                    | Ministry of Health Turkey                                | Fatma Bayrakdar et al |
| EPI_ISL_812896 | Ministry of Health Turkey                                                                                    | Ministry of Health Turkey                                | Fatma Bayrakdar et al |
| EPI_ISL_812890 | Ministry of Health Turkey                                                                                    | Ministry of Health Turkey                                | Fatma Bayrakdar et al |
| EPI_ISL_812891 | Ministry of Health Turkey                                                                                    | Ministry of Health Turkey                                | Fatma Bayrakdar et al |
| EPI_ISL_812905 | Ministry of Health Turkey                                                                                    | Ministry of Health Turkey                                | Fatma Bayrakdar et al |
| EPI_ISL_427391 | Genomic Laboratory (GLAB) (Conjoint lab of Health Directorate of Istanbul and Istanbul Technical University) | Genomic Laboratory (GLAB), Istanbul Technical University | Ilker Karacan et al   |

|                |                                                                                                              |                                                                            |                                                  |
|----------------|--------------------------------------------------------------------------------------------------------------|----------------------------------------------------------------------------|--------------------------------------------------|
| EPI_ISL_428346 | Genomic Laboratory (GLAB) (Conjoint lab of Health Directorate of Istanbul and Istanbul Technical University) | Genomic Laboratory (GLAB), Istanbul Technical University                   | Ilker Karacan et al                              |
| EPI_ISL_735269 | Genomic Laboratory (GLAB) (Conjoint lab of Health Directorate of Istanbul and Istanbul Technical University) | Genomic Laboratory (GLAB), Istanbul Technical University                   | Ilker Karacan et al                              |
| EPI_ISL_735275 | Genomic Laboratory (GLAB) (Conjoint lab of Health Directorate of Istanbul and Istanbul Technical University) | Genomic Laboratory (GLAB), Istanbul Technical University                   | Ilker Karacan et al                              |
| EPI_ISL_480252 | Genomic Laboratory (GLAB) (Conjoint lab of Health Directorate of Istanbul and Istanbul Technical University) | Genomic Laboratory (GLAB), Istanbul Technical University                   | Ilker Karacan et al                              |
| EPI_ISL_480257 | Genomic Laboratory (GLAB) (Conjoint lab of Health Directorate of Istanbul and Istanbul Technical University) | Genomic Laboratory (GLAB), Istanbul Technical University                   | Ilker Karacan et al                              |
| EPI_ISL_480274 | Genomic Laboratory (GLAB) (Conjoint lab of Health Directorate of Istanbul and Istanbul Technical University) | Genomic Laboratory (GLAB), Istanbul Technical University                   | Ilker Karacan et al                              |
| EPI_ISL_480276 | Genomic Laboratory (GLAB) (Conjoint lab of Health Directorate of Istanbul and Istanbul Technical University) | Genomic Laboratory (GLAB), Istanbul Technical University                   | Ilker Karacan et al                              |
| EPI_ISL_480280 | Genomic Laboratory (GLAB) (Conjoint lab of Health Directorate of Istanbul and Istanbul Technical University) | Genomic Laboratory (GLAB), Istanbul Technical University                   | Ilker Karacan et al                              |
| EPI_ISL_735293 | Genomic Laboratory (GLAB) (Conjoint lab of Health Directorate of Istanbul and Istanbul Technical University) | Genomic Laboratory (GLAB), Istanbul Technical University                   | Ilker Karacan et al                              |
| EPI_ISL_735344 | Genomic Laboratory (GLAB) (Conjoint lab of Health Directorate of Istanbul and Istanbul Technical University) | Genomic Laboratory (GLAB), Istanbul Technical University                   | Ilker Karacan et al                              |
| EPI_ISL_735346 | Genomic Laboratory (GLAB) (Conjoint lab of Health Directorate of Istanbul and Istanbul Technical University) | Genomic Laboratory (GLAB), Istanbul Technical University                   | Ilker Karacan et al                              |
| EPI_ISL_735347 | Genomic Laboratory (GLAB) (Conjoint lab of Health Directorate of Istanbul and Istanbul Technical University) | Genomic Laboratory (GLAB), Istanbul Technical University                   | Ilker Karacan et al                              |
| EPI_ISL_735355 | Genomic Laboratory (GLAB) (Conjoint lab of Health Directorate of Istanbul and Istanbul Technical University) | Genomic Laboratory (GLAB), Istanbul Technical University                   | Ilker Karacan et al                              |
| EPI_ISL_735359 | Genomic Laboratory (GLAB) (Conjoint lab of Health Directorate of Istanbul and Istanbul Technical University) | Genomic Laboratory (GLAB), Istanbul Technical University                   | Ilker Karacan et al                              |
| EPI_ISL_735364 | Genomic Laboratory (GLAB) (Conjoint lab of Health Directorate of Istanbul and Istanbul Technical University) | Genomic Laboratory (GLAB), Istanbul Technical University                   | Ilker Karacan et al                              |
| EPI_ISL_735368 | Genomic Laboratory (GLAB) (Conjoint lab of Health Directorate of Istanbul and Istanbul Technical University) | Genomic Laboratory (GLAB), Istanbul Technical University                   | Ilker Karacan et al                              |
| EPI_ISL_735370 | Genomic Laboratory (GLAB) (Conjoint lab of Health Directorate of Istanbul and Istanbul Technical University) | Genomic Laboratory (GLAB), Istanbul Technical University                   | Ilker Karacan et al                              |
| EPI_ISL_735372 | Genomic Laboratory (GLAB) (Conjoint lab of Health Directorate of Istanbul and Istanbul Technical University) | Genomic Laboratory (GLAB), Istanbul Technical University                   | Ilker Karacan et al                              |
| EPI_ISL_833142 | Genomic Laboratory (GLAB) (Conjoint lab of Health Directorate of Istanbul and Istanbul Technical University) | Genomic Laboratory (GLAB), Istanbul Technical University                   | Ilker Karacan et al                              |
| EPI_ISL_478669 | unknown                                                                                                      | Microbiology, Koc University                                               | Can et al                                        |
| EPI_ISL_495429 | Kafkas University, Faculty of Medicine, Department of Medical Microbiology                                   | Kafkas University, Faculty of Medicine, Department of Medical Microbiology | Murat Karamese et al                             |
| EPI_ISL_495433 | Kafkas University, Faculty of Medicine, Department of Medical Microbiology                                   | Kafkas University, Faculty of Medicine, Department of Medical Microbiology | Murat Karamese et al                             |
| EPI_ISL_495436 | Kafkas University, Faculty of Medicine, Department of Medical Microbiology                                   | Kafkas University, Faculty of Medicine, Department of Medical Microbiology | Murat Karamese et al                             |
| EPI_ISL_495445 | Kafkas University, Faculty of Medicine, Department of Medical Microbiology                                   | Kafkas University, Faculty of Medicine, Department of Medical Microbiology | Murat Karamese et al                             |
| EPI_ISL_427271 | AZ SPHL, Arizona Department of Health Services                                                               | TGen North                                                                 | Jolene Bowers et al                              |
| EPI_ISL_696272 | Sonora Quest Laboratories, Laboratory Sciences of Arizona                                                    | TGen North                                                                 | Jolene Bowers et al                              |
| EPI_ISL_483333 | UC San Diego Center for Advanced Laboratory Medicine                                                         | Andersen lab at Scripps Research                                           | SEARCH Alliance San Diego with David Pride et al |

|                |                                                                                                            |                                                                                                                            |                                                      |
|----------------|------------------------------------------------------------------------------------------------------------|----------------------------------------------------------------------------------------------------------------------------|------------------------------------------------------|
| EPI_ISL_483416 | UC San Diego Center for Advanced Laboratory Medicine                                                       | Andersen lab at Scripps Research                                                                                           | SEARCH Alliance San Diego with David Pride et al     |
| EPI_ISL_494441 | San Diego County Public Health Laboratory                                                                  | Andersen lab at Scripps Research                                                                                           | SEARCH Alliance San Diego with Tracy Basler et al    |
| EPI_ISL_494451 | San Diego County Public Health Laboratory                                                                  | Andersen lab at Scripps Research                                                                                           | SEARCH Alliance San Diego with Tracy Basler et al    |
| EPI_ISL_494455 | San Diego County Public Health Laboratory                                                                  | Andersen lab at Scripps Research                                                                                           | SEARCH Alliance San Diego with Tracy Basler et al    |
| EPI_ISL_494489 | San Diego County Public Health Laboratory                                                                  | Andersen lab at Scripps Research                                                                                           | SEARCH Alliance San Diego with Tracy Basler et al    |
| EPI_ISL_512220 | San Diego County Public Health Laboratory                                                                  | Andersen lab at Scripps Research                                                                                           | SEARCH Alliance San Diego with Tracy Basler et al    |
| EPI_ISL_635337 | San Diego County Public Health Laboratory                                                                  | Andersen lab at Scripps Research                                                                                           | SEARCH Alliance San Diego with Tracy Basler et al    |
| EPI_ISL_636080 | San Diego County Public Health Laboratory                                                                  | Andersen lab at Scripps Research                                                                                           | SEARCH Alliance San Diego with Tracy Basler et al    |
| EPI_ISL_730151 | Scripps Medical Laboratory                                                                                 | Andersen lab at Scripps Research                                                                                           | SEARCH Alliance San Diego with Michael Quigley et al |
| EPI_ISL_903915 | CDPH, Viral and Rickettsial Disease Laboratory                                                             | Genomics and Discovery, Respiratory Viruses Branch, Division of Viral Diseases, Centers for Disease Control and Prevention | Krista Queen et al                                   |
| EPI_ISL_408010 | California Department of Health                                                                            | Pathogen Discovery, Respiratory Viruses Branch, Division of Viral Diseases, Centers for Disease Control and Prevention     | Ying Tao et al                                       |
| EPI_ISL_410044 | California Department of Public Health                                                                     | Pathogen Discovery, Respiratory Viruses Branch, Division of Viral Diseases, Centers for Disease Control and Prevention     | Jing Zhang et al                                     |
| EPI_ISL_753629 | Clinical virology Laboratory, Children's Hospital Los Angeles                                              | Center for Personalized Medicine, Children's Hospital Los Angeles                                                          | Gai et al et al                                      |
| EPI_ISL_824656 | Cedars-Sinai Medical Center, Department of Pathology & Laboratory Medicine, Molecular Pathology Laboratory | Department of Pathology & Laboratory Medicine and Genomic Core                                                             | Wenjuan Zhang et al                                  |
| EPI_ISL_739043 | Humboldt County Public Health Laboratory                                                                   | Chan-Zuckerberg Biohub                                                                                                     | CZB Cliahub Consortium et al                         |
| EPI_ISL_850172 | Renegade                                                                                                   | Chan-Zuckerberg Biohub                                                                                                     | CZB Cliahub Consortium et al                         |
| EPI_ISL_582972 | San Luis Obispo Public Health Department                                                                   | Chan-Zuckerberg Biohub                                                                                                     | CZB Cliahub Consortium et al                         |
| EPI_ISL_435583 | Santa Clara County Public Health Department                                                                | Chiu Laboratory, University of California, San Francisco                                                                   | Xianding Deng et al                                  |
| EPI_ISL_437578 | Scripps Medical Laboratory                                                                                 | Andersen lab at Scripps Research                                                                                           | SEARCH Alliance San Diego with Michael Quigley et al |
| EPI_ISL_458254 | Scripps Medical Laboratory                                                                                 | Andersen lab at Scripps Research                                                                                           | SEARCH Alliance San Diego with Michael Quigley et al |
| EPI_ISL_416697 | UW Virology Lab                                                                                            | UW Virology Lab                                                                                                            | Pavitra Roychoudhury et al                           |
| EPI_ISL_708424 | Delaware Public Health Lab                                                                                 | Delaware Public Health Lab                                                                                                 | Gregory Hovan et al                                  |
| EPI_ISL_479764 | University of Miami Immunology and Histocompatibility Laboratory                                           | University of Miami Immunology and Histocompatibility Laboratory                                                           | Emilio Margolles-Clark et al                         |
| EPI_ISL_508709 | Florida Bureau of Public Health Laboratories                                                               | Florida Bureau of Public Health Laboratories                                                                               | Sarah Schmedes et al                                 |
| EPI_ISL_517790 | Florida Bureau of Public Health Laboratories                                                               | Florida Bureau of Public Health Laboratories                                                                               | Sarah Schmedes et al                                 |
| EPI_ISL_517844 | Florida Bureau of Public Health Laboratories                                                               | Florida Bureau of Public Health Laboratories                                                                               | Sarah Schmedes et al                                 |
| EPI_ISL_517878 | Florida Bureau of Public Health Laboratories                                                               | Florida Bureau of Public Health Laboratories                                                                               | Sarah Schmedes et al                                 |
| EPI_ISL_517884 | Florida Bureau of Public Health Laboratories                                                               | Florida Bureau of Public Health Laboratories                                                                               | Sarah Schmedes et al                                 |
| EPI_ISL_594371 | Florida Bureau of Public Health Laboratories                                                               | Florida Bureau of Public Health Laboratories                                                                               | Sarah Schmedes et al                                 |
| EPI_ISL_594383 | Florida Bureau of Public Health Laboratories                                                               | Florida Bureau of Public Health Laboratories                                                                               | Sarah Schmedes et al                                 |
| EPI_ISL_613853 | Florida Bureau of Public Health Laboratories                                                               | Florida Bureau of Public Health Laboratories                                                                               | Sarah Schmedes et al                                 |



|                |                                                                          |                                                                                                                            |                              |
|----------------|--------------------------------------------------------------------------|----------------------------------------------------------------------------------------------------------------------------|------------------------------|
| EPI_ISL_848938 | Florida Bureau of Public Health Laboratories                             | Florida Bureau of Public Health Laboratories                                                                               | Sarah Schmedes et al         |
| EPI_ISL_849078 | Florida Bureau of Public Health Laboratories                             | Florida Bureau of Public Health Laboratories                                                                               | Sarah Schmedes et al         |
| EPI_ISL_849081 | Florida Bureau of Public Health Laboratories                             | Florida Bureau of Public Health Laboratories                                                                               | Sarah Schmedes et al         |
| EPI_ISL_849043 | Florida Bureau of Public Health Laboratories                             | Florida Bureau of Public Health Laboratories                                                                               | Sarah Schmedes et al         |
| EPI_ISL_876555 | Florida Bureau of Public Health Laboratories                             | Florida Bureau of Public Health Laboratories                                                                               | Sarah Schmedes et al         |
| EPI_ISL_984300 | Tampa General Hospital Esoteric Lab                                      | Tampa General Hospital Esoteric Research & Development Lab                                                                 | Grant Vestal et al           |
| EPI_ISL_419559 | FL Bureau of Public Health Laboratories-Tampa                            | Pathogen Discovery, Respiratory Viruses Branch, Division of Viral Diseases, Centers for Disease Control and Prevention     | Anna Uehara et al            |
| EPI_ISL_529804 | Michigan Department of Health and Human Services, Bureau of Laboratories | Michigan Department of Health and Human Services, Bureau of Laboratories                                                   | Blankenship HM et al         |
| EPI_ISL_903574 | HI Dept. of Health, State Laboratories Division                          | Genomics and Discovery, Respiratory Viruses Branch, Division of Viral Diseases, Centers for Disease Control and Prevention | Krista Queen et al           |
| EPI_ISL_903682 | IL Dept. of Public Health Springfield Laboratory                         | Genomics and Discovery, Respiratory Viruses Branch, Division of Viral Diseases, Centers for Disease Control and Prevention | Krista Queen et al           |
| EPI_ISL_848344 | Illinois Department of Public Health                                     | Gagnon Lab, Southern Illinois University                                                                                   | Keith Gagnon et al           |
| EPI_ISL_936847 | Northwestern Memorial Hospital                                           | Ozer Lab                                                                                                                   | Ramon Lorenzo-Redondo et al  |
| EPI_ISL_404253 | IL Department of Public Health Chicago Laboratory                        | Pathogen Discovery, Respiratory Viruses Branch, Division of Viral Diseases, Centers for Disease Control and Prevention     | Ying Tao et al               |
| EPI_ISL_791859 | Massachusetts General Hospital                                           | Infectious Disease Program, Broad Institute of Harvard and MIT                                                             | Lemieux et al                |
| EPI_ISL_765583 | Brigham and Womens Hospital                                              | Infectious Disease Program, Broad Institute of Harvard and MIT                                                             | Lemieux et al                |
| EPI_ISL_765622 | Massachusetts General Hospital                                           | Infectious Disease Program, Broad Institute of Harvard and MIT                                                             | Lemieux et al                |
| EPI_ISL_765635 | Massachusetts General Hospital                                           | Infectious Disease Program, Broad Institute of Harvard and MIT                                                             | Lemieux et al                |
| EPI_ISL_854906 | Quest Diagnostics                                                        | Quest Diagnostics                                                                                                          | Rosenthal et al              |
| EPI_ISL_981093 | Johns Hopkins Hospital Department of Pathology                           | Johns Hopkins Hospital Department of Pathology                                                                             | C. Paul Morris et al         |
| EPI_ISL_981091 | Johns Hopkins Hospital Department of Pathology                           | Johns Hopkins Hospital Department of Pathology                                                                             | C. Paul Morris et al         |
| EPI_ISL_981092 | Johns Hopkins Hospital Department of Pathology                           | Johns Hopkins Hospital Department of Pathology                                                                             | C. Paul Morris et al         |
| EPI_ISL_981126 | Johns Hopkins Hospital Department of Pathology                           | Johns Hopkins Hospital Department of Pathology                                                                             | C. Paul Morris et al         |
| EPI_ISL_981183 | Johns Hopkins Hospital Department of Pathology                           | Johns Hopkins Hospital Department of Pathology                                                                             | C. Paul Morris et al         |
| EPI_ISL_981090 | Johns Hopkins Hospital Department of Pathology                           | Johns Hopkins Hospital Department of Pathology                                                                             | C. Paul Morris et al         |
| EPI_ISL_966800 | Maine HETL                                                               | Tewhey Lab, The Jackson Laboratory                                                                                         | Matluk et al                 |
| EPI_ISL_496922 | Minnesota Department of Health, Public Health Laboratory                 | Minnesota Department of Health, Public Health Laboratory                                                                   | Matt Plumb et al             |
| EPI_ISL_873257 | M Health Fairview                                                        | Minnesota Department of Health, Public Health Laboratory                                                                   | Alexandra Lorentz et al      |
| EPI_ISL_913587 | Vault Health                                                             | Minnesota Department of Health, Public Health Laboratory                                                                   | Alexandra Lorentz et al      |
| EPI_ISL_450775 | Minnesota Department of Health, Public Health Laboratory                 | Minnesota Department of Health, Public Health Laboratory                                                                   | Matt Plumb et al             |
| EPI_ISL_877718 | Clinical Molecular Microbiology Laboratory, UNC Hospital                 | Dirk Dittmer                                                                                                               | Razia Moorad et al           |
| EPI_ISL_877742 | Clinical Molecular Microbiology Laboratory, UNC Hospital                 | Dirk Dittmer                                                                                                               | Razia Moorad et al           |
| EPI_ISL_884293 | Clinical Molecular Microbiology Laboratory, UNC Hospital                 | Dirk Dittmer                                                                                                               | Razia Moorad et al           |
| EPI_ISL_802110 | MSHS Clinical Microbiology Laboratories                                  | MSHS Pathogen Surveillance Program                                                                                         | Ana S. Gonzalez-Reiche et al |
| EPI_ISL_801905 | MSHS Clinical Microbiology Laboratories                                  | MSHS Pathogen Surveillance Program                                                                                         | Ana S. Gonzalez-Reiche et al |
| EPI_ISL_802411 | MSHS Clinical Microbiology Laboratories                                  | MSHS Pathogen Surveillance Program                                                                                         | Ana S. Gonzalez-Reiche et al |
| EPI_ISL_683969 | DOHMH Morrisania                                                         | New York City Public Health Laboratory                                                                                     | Jade Wang et al              |
| EPI_ISL_994919 | Pandemic Response Lab - NYC                                              | Pandemic Response Lab, R&D                                                                                                 | Henry Lee et al              |

|                 |                                                              |                                                              |                          |
|-----------------|--------------------------------------------------------------|--------------------------------------------------------------|--------------------------|
| EPI_ISL_995027  | Pandemic Response Lab - NYC                                  | Pandemic Response Lab, R&D                                   | Henry Lee et al          |
| EPI_ISL_995105  | Pandemic Response Lab - NYC                                  | Pandemic Response Lab, R&D                                   | Henry Lee et al          |
| EPI_ISL_995156  | Pandemic Response Lab - NYC                                  | Pandemic Response Lab, R&D                                   | Henry Lee et al          |
| EPI_ISL_468585  | Quest Diagnostics                                            | Quest Diagnostics                                            | Anderson et al           |
| EPI_ISL_896284  | SUNY UPSTATE MEDICAL UNIVERSITY                              | Wadsworth Center, New York State Department of Health        | Kirsten St. George et al |
| EPI_ISL_676806  | Wadsworth Center, New York State Department.of Health        | Wadsworth Center, New York State Department.of Health        | Kirsten St. George et al |
| EPI_ISL_676830  | Wadsworth Center, New York State Department.of Health        | Wadsworth Center, New York State Department.of Health        | Kirsten St. George et al |
| EPI_ISL_1000967 | The Ohio State University Wexner Medical Center              | James Molecular Lab                                          | Huolin Tu et al          |
| EPI_ISL_482401  | Providence St. Joseph Health Molecular Genomics Laboratory   | Providence St. Joseph Health Molecular Genomics Laboratory   | Alexa K Dowdell et al    |
| EPI_ISL_569623  | Quick Care Watertown                                         | South Dakota Public Health Laboratory                        | Matt Plumb et al         |
| EPI_ISL_522359  | Texas Department of State Health Services                    | Texas Department of State Health Services                    | Rashmi Tuladhar et al    |
| EPI_ISL_543817  | Houston Methodist Hospital                                   | Houston Methodist Hospital                                   | S. Wesley Long et al     |
| EPI_ISL_544143  | Houston Methodist Hospital                                   | Houston Methodist Hospital                                   | S. Wesley Long et al     |
| EPI_ISL_789643  | Houston Methodist Hospital                                   | Houston Methodist Hospital                                   | S. Wesley Long et al     |
| EPI_ISL_790211  | Houston Methodist Hospital                                   | Houston Methodist Hospital                                   | S. Wesley Long et al     |
| EPI_ISL_790246  | Houston Methodist Hospital                                   | Houston Methodist Hospital                                   | S. Wesley Long et al     |
| EPI_ISL_788060  | Houston Methodist Hospital                                   | Houston Methodist Hospital                                   | S. Wesley Long et al     |
| EPI_ISL_788564  | Houston Methodist Hospital                                   | Houston Methodist Hospital                                   | S. Wesley Long et al     |
| EPI_ISL_786331  | Houston Methodist Hospital                                   | Houston Methodist Hospital                                   | S. Wesley Long et al     |
| EPI_ISL_780899  | Houston Methodist Hospital                                   | Houston Methodist Hospital                                   | S. Wesley Long et al     |
| EPI_ISL_780223  | Houston Methodist Hospital                                   | Houston Methodist Hospital                                   | S. Wesley Long et al     |
| EPI_ISL_780365  | Houston Methodist Hospital                                   | Houston Methodist Hospital                                   | S. Wesley Long et al     |
| EPI_ISL_943692  | Utah Public Health Laboratory                                | Utah Public Health Laboratory                                | Erin L. Young et al      |
| EPI_ISL_485866  | Virginia DCLS                                                | Virginia DCLS                                                | Virginia DCLS et al      |
| EPI_ISL_516699  | Virginia DCLS                                                | Virginia DCLS                                                | Virginia DCLS et al      |
| EPI_ISL_610145  | Virginia DCLS                                                | Virginia DCLS                                                | Virginia DCLS et al      |
| EPI_ISL_644845  | Virginia DCLS                                                | Virginia DCLS                                                | Virginia DCLS et al      |
| EPI_ISL_614056  | Virginia DCLS                                                | Virginia DCLS                                                | Virginia DCLS et al      |
| EPI_ISL_677212  | Virginia Division of Consolidated Laboratory Services        | Virginia Division of Consolidated Laboratory Services        | Virginia DCLS et al      |
| EPI_ISL_723494  | Virginia Division of Consolidated Laboratory Services (DCLS) | Virginia Division of Consolidated Laboratory Services (DCLS) | Virginia DCLS et al      |
| EPI_ISL_925204  | Virginia DCLS                                                | Virginia DCLS                                                | Virginia DCLS et al      |
| EPI_ISL_942395  | Virginia DCLS                                                | Virginia DCLS                                                | Virginia DCLS et al      |
| EPI_ISL_417153  | Washington State Department of Health                        | Seattle Flu Study                                            | Chu etl al et al         |
| EPI_ISL_417155  | Washington State Department of Health                        | Seattle Flu Study                                            | Chu etl al et al         |
| EPI_ISL_417158  | Washington State Department of Health                        | Seattle Flu Study                                            | Chu etl al et al         |
| EPI_ISL_417161  | Washington State Department of Health                        | Seattle Flu Study                                            | Chu etl al et al         |
| EPI_ISL_463669  | Washington State Department of Health                        | Seattle Flu Study                                            | Chu et al et al          |
| EPI_ISL_430160  | Washington State Department of Health                        | Seattle Flu Study                                            | Chu et al et al          |
| EPI_ISL_430186  | Washington State Department of Health                        | Seattle Flu Study                                            | Chu et al et al          |

|                |                                                                      |                                                                                                                        |                            |
|----------------|----------------------------------------------------------------------|------------------------------------------------------------------------------------------------------------------------|----------------------------|
| EPI_ISL_430272 | Washington State Department of Health                                | Seattle Flu Study                                                                                                      | Chu et al et al            |
| EPI_ISL_430273 | Washington State Department of Health                                | Seattle Flu Study                                                                                                      | Chu et al et al            |
| EPI_ISL_497021 | Washington State Department of Health                                | Seattle Flu Study                                                                                                      | Deborah A. Nickerson et al |
| EPI_ISL_430131 | Seattle Flu Study                                                    | Seattle Flu Study                                                                                                      | Chu et al et al            |
| EPI_ISL_430135 | Seattle Flu Study                                                    | Seattle Flu Study                                                                                                      | Chu et al et al            |
| EPI_ISL_413560 | Seattle Flu Study                                                    | Seattle Flu Study                                                                                                      | Chu et al et al            |
| EPI_ISL_417098 | Washington State Department of Health                                | Seattle Flu Study                                                                                                      | Chu et al et al            |
| EPI_ISL_416460 | Seattle Flu Study                                                    | Seattle Flu Study                                                                                                      | Chu et al et al            |
| EPI_ISL_417152 | Washington State Department of Health                                | Seattle Flu Study                                                                                                      | Chu et al et al            |
| EPI_ISL_570998 | UW Virology Lab                                                      | UW Virology Lab                                                                                                        | Pavitra Roychoudhury et al |
| EPI_ISL_547582 | University of Wisconsin-Madison AIDS Vaccine Research Laboratories   | University of Wisconsin-Madison AIDS Vaccine Research Laboratories                                                     | Gage Moreno et al          |
| EPI_ISL_677337 | University of Wisconsin-Madison AIDS Vaccine Research Laboratories   | University of Wisconsin-Madison AIDS Vaccine Research Laboratories                                                     | Gage Moreno et al          |
| EPI_ISL_677623 | University of Wisconsin-Madison AIDS Vaccine Research Laboratories   | University of Wisconsin-Madison AIDS Vaccine Research Laboratories                                                     | Gage Moreno et al          |
| EPI_ISL_471248 | Wisconsin State Laboratory of Hygiene Communicable Disease Division  | Wisconsin State Laboratory of Hygiene Communicable Disease Division                                                    | Kelsey R. Florek et al     |
| EPI_ISL_408670 | Wisconsin Department of Health Services                              | Pathogen Discovery, Respiratory Viruses Branch, Division of Viral Diseases, Centers for Disease Control and Prevention | Jing Zhang et al           |
| EPI_ISL_614260 | Wyoming Public Health Laboratory                                     | Center for Global Health, University of New Mexico Health Sciences Center                                              | Daryl Domman et al         |
| EPI_ISL_942939 | Wyoming Public Health Laboratory                                     | Wyoming Public Health Laboratory                                                                                       | Noah Hull et al            |
| EPI_ISL_451185 | Uganda Virus Research Institute                                      | MRC/UVRI & LSHTM Uganda Research Unit                                                                                  | Dan Lule Bugembe et al     |
| EPI_ISL_451187 | Uganda Virus Research Institute                                      | MRC/UVRI & LSHTM Uganda Research Unit                                                                                  | Dan Lule Bugembe et al     |
| EPI_ISL_451188 | Uganda Virus Research Institute                                      | MRC/UVRI & LSHTM Uganda Research Unit                                                                                  | Dan Lule Bugembe et al     |
| EPI_ISL_451191 | Uganda Virus Research Institute                                      | MRC/UVRI & LSHTM Uganda Research Unit                                                                                  | Dan Lule Bugembe et al     |
| EPI_ISL_451195 | Uganda Virus Research Institute                                      | MRC/UVRI & LSHTM Uganda Research Unit                                                                                  | Dan Lule Bugembe et al     |
| EPI_ISL_451197 | Uganda Virus Research Institute                                      | MRC/UVRI & LSHTM Uganda Research Unit                                                                                  | Dan Lule Bugembe et al     |
| EPI_ISL_451198 | Uganda Virus Research Institute                                      | MRC/UVRI & LSHTM Uganda Research Unit                                                                                  | Dan Lule Bugembe et al     |
| EPI_ISL_451199 | Uganda Virus Research Institute                                      | MRC/UVRI & LSHTM Uganda Research Unit                                                                                  | Dan Lule Bugembe et al     |
| EPI_ISL_451201 | Uganda Virus Research Institute                                      | MRC/UVRI & LSHTM Uganda Research Unit                                                                                  | Dan Lule Bugembe et al     |
| EPI_ISL_737946 | Uganda Central Public Health Lab and Uganda Virus Research Institute | MRC/UVRI & LSHTM Uganda Research Unit                                                                                  | Matthew Cotten et al       |
| EPI_ISL_737934 | Uganda Central Public Health Lab and Uganda Virus Research Institute | MRC/UVRI & LSHTM Uganda Research Unit                                                                                  | Matthew Cotten et al       |
| EPI_ISL_737948 | Uganda Central Public Health Lab and Uganda Virus Research Institute | MRC/UVRI & LSHTM Uganda Research Unit                                                                                  | Matthew Cotten et al       |
| EPI_ISL_737949 | Uganda Central Public Health Lab and Uganda Virus Research Institute | MRC/UVRI & LSHTM Uganda Research Unit                                                                                  | Matthew Cotten et al       |
| EPI_ISL_737951 | Uganda Central Public Health Lab and Uganda Virus Research Institute | MRC/UVRI & LSHTM Uganda Research Unit                                                                                  | Matthew Cotten et al       |
| EPI_ISL_737932 | Uganda Central Public Health Lab and Uganda Virus Research Institute | MRC/UVRI & LSHTM Uganda Research Unit                                                                                  | Matthew Cotten et al       |
| EPI_ISL_737952 | Uganda Central Public Health Lab and Uganda Virus Research Institute | MRC/UVRI & LSHTM Uganda Research Unit                                                                                  | Matthew Cotten et al       |







|                |                                                                                                                                                |                                                                                                                                                              |                                 |
|----------------|------------------------------------------------------------------------------------------------------------------------------------------------|--------------------------------------------------------------------------------------------------------------------------------------------------------------|---------------------------------|
| EPI_ISL_512643 | National Laboratory for Influenza/Virology reference laboratory,<br>Public Health Center of the Ministry of Health of Ukraine                  | Respiratory Virus Unit, Microbiology Services Colindale, Public<br>Health England                                                                            | PHE Covid Sequencing Team et al |
| EPI_ISL_654818 | Department of Respiratory and other Viral Infections of<br>L.V.Gromashevsky Institute of Epidemiology & Infectious Diseases<br>NAMS of Ukraine | Department of Respiratory and other Viral Infections of<br>L.V.Gromashevsky Institute of Epidemiology & Infectious<br>Diseases NAMS of Ukraine, JSC "Farmak" | Alla Mironenko et al            |
| EPI_ISL_654819 | Department of Respiratory and other Viral Infections of<br>L.V.Gromashevsky Institute of Epidemiology & Infectious Diseases<br>NAMS of Ukraine | Department of Respiratory and other Viral Infections of<br>L.V.Gromashevsky Institute of Epidemiology & Infectious<br>Diseases NAMS of Ukraine, JSC "Farmak" | Alla Mironenko et al            |
| EPI_ISL_576147 | Department of Respiratory & Other Viral Infections of L.V.<br>Gromashevsky Institute of Epidemiology & Infectious Diseases<br>NAMS of Ukraine  | Department of Respiratory & Other Viral Infections of L.V.<br>Gromashevsky Institute of Epidemiology & Infectious Diseases<br>NAMS of Ukraine, JSC "Farmak"  | Alla Mironenko et al            |
| EPI_ISL_576146 | Department of Respiratory & Other Viral Infections of L.V.<br>Gromashevsky Institute of Epidemiology & Infectious Diseases<br>NAMS of Ukraine  | Department of Respiratory & Other Viral Infections of L.V.<br>Gromashevsky Institute of Epidemiology & Infectious Diseases<br>NAMS of Ukraine, JSC "Farmak"  | Alla Mironenko et al            |
| EPI_ISL_582513 | Department of Respiratory and other Viral Infections of<br>L.V.Gromashevsky Institute of Epidemiology & Infectious Diseases<br>NAMS of Ukraine | Department of Respiratory and other Viral Infections of<br>L.V.Gromashevsky Institute of Epidemiology & Infectious<br>Diseases NAMS of Ukraine, JSC "Farmak" | Alla Mironenko et al            |
| EPI_ISL_582509 | Department of Respiratory and other Viral Infections of<br>L.V.Gromashevsky Institute of Epidemiology & Infectious Diseases<br>NAMS of Ukraine | Department of Respiratory and other Viral Infections of<br>L.V.Gromashevsky Institute of Epidemiology & Infectious<br>Diseases NAMS of Ukraine, JSC "Farmak" | Alla Mironenko et al            |
| EPI_ISL_582510 | Department of Respiratory and other Viral Infections of<br>L.V.Gromashevsky Institute of Epidemiology & Infectious Diseases<br>NAMS of Ukraine | Department of Respiratory and other Viral Infections of<br>L.V.Gromashevsky Institute of Epidemiology & Infectious<br>Diseases NAMS of Ukraine, JSC "Farmak" | Alla Mironenko et al            |
| EPI_ISL_582511 | Department of Respiratory and other Viral Infections of<br>L.V.Gromashevsky Institute of Epidemiology & Infectious Diseases<br>NAMS of Ukraine | Department of Respiratory and other Viral Infections of<br>L.V.Gromashevsky Institute of Epidemiology & Infectious<br>Diseases NAMS of Ukraine, JSC "Farmak" | Alla Mironenko et al            |
| EPI_ISL_582512 | Department of Respiratory and other Viral Infections of<br>L.V.Gromashevsky Institute of Epidemiology & Infectious Diseases<br>NAMS of Ukraine | Department of Respiratory and other Viral Infections of<br>L.V.Gromashevsky Institute of Epidemiology & Infectious<br>Diseases NAMS of Ukraine, JSC "Farmak" | Alla Mironenko et al            |
| EPI_ISL_576148 | Department of Respiratory & Other Viral Infections of L.V.<br>Gromashevsky Institute of Epidemiology & Infectious Diseases<br>NAMS of Ukraine  | Department of Respiratory & Other Viral Infections of L.V.<br>Gromashevsky Institute of Epidemiology & Infectious Diseases<br>NAMS of Ukraine, JSC "Farmak"  | Alla Mironenko et al            |
| EPI_ISL_979973 | Department of Respiratory and other Viral Infections of<br>L.V.Gromashevsky Institute of Epidemiology & Infectious Diseases<br>NAMS of Ukraine | Department of Respiratory and other Viral Infections of<br>L.V.Gromashevsky Institute of Epidemiology & Infectious<br>Diseases NAMS of Ukraine, JSC "Farmak" | Alla Mironenko et al            |
| EPI_ISL_576149 | Department of Respiratory & Other Viral Infections of L.V.<br>Gromashevsky Institute of Epidemiology & Infectious Diseases<br>NAMS of Ukraine  | Department of Respiratory & Other Viral Infections of L.V.<br>Gromashevsky Institute of Epidemiology & Infectious Diseases<br>NAMS of Ukraine, JSC "Farmak"  | Alla Mironenko et al            |
| EPI_ISL_654820 | Department of Respiratory and other Viral Infections of<br>L.V.Gromashevsky Institute of Epidemiology & Infectious Diseases<br>NAMS of Ukraine | Department of Respiratory and other Viral Infections of<br>L.V.Gromashevsky Institute of Epidemiology & Infectious<br>Diseases NAMS of Ukraine, JSC "Farmak" | Alla Mironenko et al            |
| EPI_ISL_979972 | Department of Respiratory and other Viral Infections of<br>L.V.Gromashevsky Institute of Epidemiology & Infectious Diseases<br>NAMS of Ukraine | Department of Respiratory and other Viral Infections of<br>L.V.Gromashevsky Institute of Epidemiology & Infectious<br>Diseases NAMS of Ukraine, JSC "Farmak" | Alla Mironenko et al            |
| EPI_ISL_698217 | Group 42 (G42) Healthcare, Abu Dhabi, United Arab Emirates;<br>Department of Health, The United Arab Emirates                                  | G42 Healthcare                                                                                                                                               | Rong Liu et al                  |
| EPI_ISL_698272 | Group 42 (G42) Healthcare, Abu Dhabi, United Arab Emirates;<br>Department of Health, The United Arab Emirates                                  | G42 Healthcare                                                                                                                                               | Rong Liu et al                  |
| EPI_ISL_698310 | Group 42 (G42) Healthcare, Abu Dhabi, United Arab Emirates;<br>Department of Health, The United Arab Emirates                                  | G42 Healthcare                                                                                                                                               | Rong Liu et al                  |
| EPI_ISL_698340 | Group 42 (G42) Healthcare, Abu Dhabi, United Arab Emirates;<br>Department of Health, The United Arab Emirates                                  | G42 Healthcare                                                                                                                                               | Rong Liu et al                  |







|                |                                                                |                                                        |                          |
|----------------|----------------------------------------------------------------|--------------------------------------------------------|--------------------------|
| EPI_ISL_859926 | BTC, Khalifa University                                        | BTC, Khalifa University                                | Al Safar et al et al     |
| EPI_ISL_859934 | BTC, Khalifa University                                        | BTC, Khalifa University                                | Al Safar et al et al     |
| EPI_ISL_859945 | BTC, Khalifa University                                        | BTC, Khalifa University                                | Al Safar et al et al     |
| EPI_ISL_859961 | BTC, Khalifa University                                        | BTC, Khalifa University                                | Al Safar et al et al     |
| EPI_ISL_859964 | BTC, Khalifa University                                        | BTC, Khalifa University                                | Al Safar et al et al     |
| EPI_ISL_860022 | BTC, Khalifa University                                        | BTC, Khalifa University                                | Al Safar et al et al     |
| EPI_ISL_860028 | BTC, Khalifa University                                        | BTC, Khalifa University                                | Al Safar et al et al     |
| EPI_ISL_860030 | BTC, Khalifa University                                        | BTC, Khalifa University                                | Al Safar et al et al     |
| EPI_ISL_860040 | BTC, Khalifa University                                        | BTC, Khalifa University                                | Al Safar et al et al     |
| EPI_ISL_860056 | BTC, Khalifa University                                        | BTC, Khalifa University                                | Al Safar et al et al     |
| EPI_ISL_860057 | BTC, Khalifa University                                        | BTC, Khalifa University                                | Al Safar et al et al     |
| EPI_ISL_860059 | BTC, Khalifa University                                        | BTC, Khalifa University                                | Al Safar et al et al     |
| EPI_ISL_860061 | BTC, Khalifa University                                        | BTC, Khalifa University                                | Al Safar et al et al     |
| EPI_ISL_860067 | BTC, Khalifa University                                        | BTC, Khalifa University                                | Al Safar et al et al     |
| EPI_ISL_860068 | BTC, Khalifa University                                        | BTC, Khalifa University                                | Al Safar et al et al     |
| EPI_ISL_860069 | BTC, Khalifa University                                        | BTC, Khalifa University                                | Al Safar et al et al     |
| EPI_ISL_860074 | BTC, Khalifa University                                        | BTC, Khalifa University                                | Al Safar et al et al     |
| EPI_ISL_860081 | BTC, Khalifa University                                        | BTC, Khalifa University                                | Al Safar et al et al     |
| EPI_ISL_528707 | Alsafar - Khalifa University Abu Dhabi                         | Alsafar - Khalifa University Abu Dhabi                 | Andreas Henschel et al   |
| EPI_ISL_528712 | Alsafar - Khalifa University Abu Dhabi                         | Alsafar - Khalifa University Abu Dhabi                 | Andreas Henschel et al   |
| EPI_ISL_528714 | Alsafar - Khalifa University Abu Dhabi                         | Alsafar - Khalifa University Abu Dhabi                 | Andreas Henschel et al   |
| EPI_ISL_528715 | Alsafar - Khalifa University Abu Dhabi                         | Alsafar - Khalifa University Abu Dhabi                 | Andreas Henschel et al   |
| EPI_ISL_528720 | Alsafar - Khalifa University Abu Dhabi                         | Alsafar - Khalifa University Abu Dhabi                 | Andreas Henschel et al   |
| EPI_ISL_435123 | Mohammed Bin Rashid University of Medicine and Health Sciences | Al Jalila Genomics Center                              | Ahmad Abou Tayoun et al  |
| EPI_ISL_520671 | Mohammed Bin Rashid University of Medicine and Health Sciences | Al Jalila Genomics Center                              | Ahmad Abou Tayoun et al  |
| EPI_ISL_520672 | Mohammed Bin Rashid University of Medicine and Health Sciences | Al Jalila Genomics Center                              | Ahmad Abou Tayoun et al  |
| EPI_ISL_520674 | Mohammed Bin Rashid University of Medicine and Health Sciences | Al Jalila Genomics Center                              | Ahmad Abou Tayoun et al  |
| EPI_ISL_435131 | Mohammed Bin Rashid University of Medicine and Health Sciences | Al Jalila Genomics Center                              | Ahmad Abou Tayoun et al  |
| EPI_ISL_435132 | Mohammed Bin Rashid University of Medicine and Health Sciences | Al Jalila Genomics Center                              | Ahmad Abou Tayoun et al  |
| EPI_ISL_435134 | Mohammed Bin Rashid University of Medicine and Health Sciences | Al Jalila Genomics Center                              | Ahmad Abou Tayoun et al  |
| EPI_ISL_435137 | Mohammed Bin Rashid University of Medicine and Health Sciences | Al Jalila Genomics Center                              | Ahmad Abou Tayoun et al  |
| EPI_ISL_435140 | Mohammed Bin Rashid University of Medicine and Health Sciences | Al Jalila Genomics Center                              | Ahmad Abou Tayoun et al  |
| EPI_ISL_469281 | Mohammed Bin Rashid University of Medicine and Health Sciences | Al Jalila Genomics Center                              | Ahmad Abou Tayoun et al  |
| EPI_ISL_520723 | Mohammed Bin Rashid University of Medicine and Health Sciences | Al Jalila Genomics Center                              | Ahmad Abou Tayoun et al  |
| EPI_ISL_520743 | Mohammed Bin Rashid University of Medicine and Health Sciences | Al Jalila Genomics Center                              | Ahmad Abou Tayoun et al  |
| EPI_ISL_582624 | Sheikh Khalifa Medical City                                    | Molecular/Surveillance lab Sheikh Khalifa Medical City | Amirtharaj Francis et al |
| EPI_ISL_582613 | Sheikh Khalifa Medical City                                    | Molecular/Surveillance lab Sheikh Khalifa Medical City | Amirtharaj Francis et al |
| EPI_ISL_582615 | Sheikh Khalifa Medical City                                    | Molecular/Surveillance lab Sheikh Khalifa Medical City | Amirtharaj Francis et al |
| EPI_ISL_582616 | Sheikh Khalifa Medical City                                    | Molecular/Surveillance lab Sheikh Khalifa Medical City | Amirtharaj Francis et al |

|                |                                                                                                           |                                                                       |                          |
|----------------|-----------------------------------------------------------------------------------------------------------|-----------------------------------------------------------------------|--------------------------|
| EPI_ISL_582617 | Sheikh Khalifa Medical City                                                                               | Molecular/Surveillance lab Sheikh Khalifa Medical City                | Amirtharaj Francis et al |
| EPI_ISL_582618 | Sheikh Khalifa Medical City                                                                               | Molecular/Surveillance lab Sheikh Khalifa Medical City                | Amirtharaj Francis et al |
| EPI_ISL_582626 | Sheikh Khalifa Medical City                                                                               | Molecular/Surveillance lab Sheikh Khalifa Medical City                | Amirtharaj Francis et al |
| EPI_ISL_582609 | Sheikh Khalifa Medical City                                                                               | Molecular/Surveillance lab Sheikh Khalifa Medical City                | Amirtharaj Francis et al |
| EPI_ISL_582610 | Sheikh Khalifa Medical City                                                                               | Molecular/Surveillance lab Sheikh Khalifa Medical City                | Amirtharaj Francis et al |
| EPI_ISL_582619 | Sheikh Khalifa Medical City                                                                               | Molecular/Surveillance lab Sheikh Khalifa Medical City                | Amirtharaj Francis et al |
| EPI_ISL_582620 | Sheikh Khalifa Medical City                                                                               | Molecular/Surveillance lab Sheikh Khalifa Medical City                | Amirtharaj Francis et al |
| EPI_ISL_582646 | Sheikh Khalifa Medical City                                                                               | Molecular/Surveillance lab Sheikh Khalifa Medical City                | Amirtharaj Francis et al |
| EPI_ISL_582648 | Sheikh Khalifa Medical City                                                                               | Molecular/Surveillance lab Sheikh Khalifa Medical City                | Amirtharaj Francis et al |
| EPI_ISL_582650 | Sheikh Khalifa Medical City                                                                               | Molecular/Surveillance lab Sheikh Khalifa Medical City                | Amirtharaj Francis et al |
| EPI_ISL_582653 | Sheikh Khalifa Medical City                                                                               | Molecular/Surveillance lab Sheikh Khalifa Medical City                | Amirtharaj Francis et al |
| EPI_ISL_582658 | Sheikh Khalifa Medical City                                                                               | Molecular/Surveillance lab Sheikh Khalifa Medical City                | Amirtharaj Francis et al |
| EPI_ISL_582663 | Sheikh Khalifa Medical City                                                                               | Molecular/Surveillance lab Sheikh Khalifa Medical City                | Amirtharaj Francis et al |
| EPI_ISL_582676 | Sheikh Khalifa Medical City                                                                               | Molecular/Surveillance lab Sheikh Khalifa Medical City                | Amirtharaj Francis et al |
| EPI_ISL_582125 | Sheikh Khalifa Medical City                                                                               | Molecular Surveillance lab Sheikh Khalifa Medical City                | Amirtharaj Francis et al |
| EPI_ISL_582608 | Sheikh Khalifa Medical City                                                                               | Molecular/Surveillance lab Sheikh Khalifa Medical City                | Amirtharaj Francis et al |
| EPI_ISL_582126 | Sheikh Khalifa Medical City                                                                               | Molecular Surveillance lab Sheikh Khalifa Medical City                | Amirtharaj Francis et al |
| EPI_ISL_750176 | Sanatorio Americano                                                                                       | Institut Pasteur de Montevideo                                        | Daiana Mir et al         |
| EPI_ISL_751184 | CENUR Litoral Norte – UdelaR, Salto, Uruguay                                                              | Institut Pasteur de Montevideo                                        | Daiana Mir et al         |
| EPI_ISL_751185 | CENUR Litoral Norte – UdelaR, Salto, Uruguay                                                              | Institut Pasteur de Montevideo                                        | Daiana Mir et al         |
| EPI_ISL_750177 | Sanatorio Americano                                                                                       | Institut Pasteur de Montevideo                                        | Daiana Mir et al         |
| EPI_ISL_750175 | CENUR Este-Sede Rocha-UdelaR                                                                              | Institut Pasteur de Montevideo                                        | Daiana Mir et al         |
| EPI_ISL_936380 | Genetica y Virologia, Facultad de Ciencias                                                                | Genetica y Virologia, Facultad de Ciencias                            | Panzera et al            |
| EPI_ISL_936382 | Genetica y Virologia, Facultad de Ciencias                                                                | Genetica y Virologia, Facultad de Ciencias                            | Panzera et al            |
| EPI_ISL_936384 | Genetica y Virologia, Facultad de Ciencias                                                                | Genetica y Virologia, Facultad de Ciencias                            | Panzera et al            |
| EPI_ISL_936385 | Genetica y Virologia, Facultad de Ciencias                                                                | Genetica y Virologia, Facultad de Ciencias                            | Panzera et al            |
| EPI_ISL_936383 | Genetica y Virologia, Facultad de Ciencias                                                                | Genetica y Virologia, Facultad de Ciencias                            | Panzera et al            |
| EPI_ISL_936386 | Genetica y Virologia, Facultad de Ciencias                                                                | Genetica y Virologia, Facultad de Ciencias                            | Panzera et al            |
| EPI_ISL_936381 | Genetica y Virologia, Facultad de Ciencias                                                                | Genetica y Virologia, Facultad de Ciencias                            | Panzera et al            |
| EPI_ISL_444493 | Departamento de Laboratorios de Salud Publica (DLSP, Division Epidemiologia, Ministerio de Salud Publica) | Facultad de Ciencias (Sección Genética Evolutiva, Sección Virología). | Panzera et al            |
| EPI_ISL_748140 | Instituto de Investigaciones Biológicas Clemente Estable                                                  | Institut Pasteur de Montevideo                                        | Daiana Mir et al         |
| EPI_ISL_748141 | Instituto de Investigaciones Biológicas Clemente Estable                                                  | Institut Pasteur de Montevideo                                        | Daiana Mir et al         |
| EPI_ISL_750178 | Sanatorio Americano                                                                                       | Institut Pasteur de Montevideo                                        | Daiana Mir et al         |
| EPI_ISL_748142 | Instituto de Investigaciones Biológicas Clemente Estable                                                  | Institut Pasteur de Montevideo                                        | Daiana Mir et al         |
| EPI_ISL_748143 | Instituto de Investigaciones Biológicas Clemente Estable                                                  | Institut Pasteur de Montevideo                                        | Daiana Mir et al         |
| EPI_ISL_748144 | Instituto de Investigaciones Biológicas Clemente Estable                                                  | Institut Pasteur de Montevideo                                        | Daiana Mir et al         |
| EPI_ISL_748145 | Instituto de Investigaciones Biológicas Clemente Estable                                                  | Institut Pasteur de Montevideo                                        | Daiana Mir et al         |
| EPI_ISL_751187 | CENUR Litoral Norte – UdelaR, Salto, Uruguay                                                              | Institut Pasteur de Montevideo                                        | Daiana Mir et al         |
| EPI_ISL_751188 | CENUR Litoral Norte – UdelaR, Salto, Uruguay                                                              | Institut Pasteur de Montevideo                                        | Daiana Mir et al         |

|                |                                                               |                                                                     |                       |
|----------------|---------------------------------------------------------------|---------------------------------------------------------------------|-----------------------|
| EPI_ISL_751201 | Laboratorio DILAVE/MGAP-INIA-UdelaR -Tacuarembó               | Institut Pasteur de Montevideo                                      | Daiana Mir et al      |
| EPI_ISL_748667 | Sanatorio Americano                                           | Institut Pasteur de Montevideo                                      | Daiana Mir et al      |
| EPI_ISL_749036 | Sanatorio Americano                                           | Institut Pasteur de Montevideo                                      | Daiana Mir et al      |
| EPI_ISL_747615 | Instituto de Investigaciones Biológicas Clemente Estable      | Institut Pasteur de Montevideo                                      | Daiana Mir et al      |
| EPI_ISL_750163 | Laboratorio DILAVE/MGAP-INIA-UdelaR -Tacuarembó               | Institut Pasteur de Montevideo                                      | Daiana Mir et al      |
| EPI_ISL_748138 | Instituto de Investigaciones Biológicas Clemente Estable      | Institut Pasteur de Montevideo                                      | Daiana Mir et al      |
| EPI_ISL_748139 | Instituto de Investigaciones Biológicas Clemente Estable      | Institut Pasteur de Montevideo                                      | Daiana Mir et al      |
| EPI_ISL_750256 | Sanatorio Americano                                           | Institut Pasteur de Montevideo                                      | Daiana Mir et al      |
| EPI_ISL_750430 | Sanatorio Americano                                           | Institut Pasteur de Montevideo                                      | Daiana Mir et al      |
| EPI_ISL_750820 | Sanatorio Americano                                           | Institut Pasteur de Montevideo                                      | Daiana Mir et al      |
| EPI_ISL_751011 | Sanatorio Americano                                           | Institut Pasteur de Montevideo                                      | Daiana Mir et al      |
| EPI_ISL_749148 | Sanatorio Americano                                           | Institut Pasteur de Montevideo                                      | Daiana Mir et al      |
| EPI_ISL_749151 | Sanatorio Americano                                           | Institut Pasteur de Montevideo                                      | Daiana Mir et al      |
| EPI_ISL_749155 | Sanatorio Americano                                           | Institut Pasteur de Montevideo                                      | Daiana Mir et al      |
| EPI_ISL_749238 | Sanatorio Americano                                           | Institut Pasteur de Montevideo                                      | Daiana Mir et al      |
| EPI_ISL_749474 | Sanatorio Americano                                           | Institut Pasteur de Montevideo                                      | Daiana Mir et al      |
| EPI_ISL_749906 | Sanatorio Americano                                           | Institut Pasteur de Montevideo                                      | Daiana Mir et al      |
| EPI_ISL_750161 | Sanatorio Americano                                           | Institut Pasteur de Montevideo                                      | Daiana Mir et al      |
| EPI_ISL_750162 | Sanatorio Americano                                           | Institut Pasteur de Montevideo                                      | Daiana Mir et al      |
| EPI_ISL_750168 | Sanatorio Americano                                           | Institut Pasteur de Montevideo                                      | Daiana Mir et al      |
| EPI_ISL_750169 | Sanatorio Americano                                           | Institut Pasteur de Montevideo                                      | Daiana Mir et al      |
| EPI_ISL_750170 | Sanatorio Americano                                           | Institut Pasteur de Montevideo                                      | Daiana Mir et al      |
| EPI_ISL_750171 | Sanatorio Americano                                           | Institut Pasteur de Montevideo                                      | Daiana Mir et al      |
| EPI_ISL_750172 | Sanatorio Americano                                           | Institut Pasteur de Montevideo                                      | Daiana Mir et al      |
| EPI_ISL_750173 | Sanatorio Americano                                           | Institut Pasteur de Montevideo                                      | Daiana Mir et al      |
| EPI_ISL_426476 | Microbial Genomics Laboratory, Institut Pasteur Montevideo    | Microbial Genomics Laboratory, Institut Pasteur Montevideo, Uruguay | Cecilia Salazar et al |
| EPI_ISL_429257 | Microbial Genomics Laboratory, Institut Pasteur Montevideo    | Microbial Genomics Laboratory, Institut Pasteur Montevideo          | Cecilia Salazar et al |
| EPI_ISL_480331 | Microbial Genomics Laboratory, Institut Pasteur de Montevideo | Microbial Genomics Laboratory, Institut Pasteur de Montevideo       | Cecilia Salazar et al |
| EPI_ISL_480332 | Microbial Genomics Laboratory, Institut Pasteur de Montevideo | Microbial Genomics Laboratory, Institut Pasteur de Montevideo       | Cecilia Salazar et al |
| EPI_ISL_480333 | Microbial Genomics Laboratory, Institut Pasteur de Montevideo | Microbial Genomics Laboratory, Institut Pasteur de Montevideo       | Cecilia Salazar et al |
| EPI_ISL_426477 | Microbial Genomics Laboratory, Institut Pasteur Montevideo    | Microbial Genomics Laboratory, Institut Pasteur Montevideo, Uruguay | Cecilia Salazar et al |
| EPI_ISL_480334 | Microbial Genomics Laboratory, Institut Pasteur de Montevideo | Microbial Genomics Laboratory, Institut Pasteur de Montevideo       | Cecilia Salazar et al |
| EPI_ISL_480335 | Microbial Genomics Laboratory, Institut Pasteur de Montevideo | Microbial Genomics Laboratory, Institut Pasteur de Montevideo       | Cecilia Salazar et al |
| EPI_ISL_426479 | Microbial Genomics Laboratory, Institut Pasteur Montevideo    | Microbial Genomics Laboratory, Institut Pasteur Montevideo          | Cecilia Salazar et al |
| EPI_ISL_480336 | Microbial Genomics Laboratory, Institut Pasteur de Montevideo | Microbial Genomics Laboratory, Institut Pasteur de Montevideo       | Cecilia Salazar et al |
| EPI_ISL_480337 | Microbial Genomics Laboratory, Institut Pasteur de Montevideo | Microbial Genomics Laboratory, Institut Pasteur de Montevideo       | Cecilia Salazar et al |
| EPI_ISL_480338 | Microbial Genomics Laboratory, Institut Pasteur de Montevideo | Microbial Genomics Laboratory, Institut Pasteur de Montevideo       | Cecilia Salazar et al |
| EPI_ISL_480339 | Microbial Genomics Laboratory, Institut Pasteur de Montevideo | Microbial Genomics Laboratory, Institut Pasteur de Montevideo       | Cecilia Salazar et al |
| EPI_ISL_480340 | Microbial Genomics Laboratory, Institut Pasteur de Montevideo | Microbial Genomics Laboratory, Institut Pasteur de Montevideo       | Cecilia Salazar et al |



|                |                                                                                  |                                                                                                                                                                                                                                                                                                                 |                               |
|----------------|----------------------------------------------------------------------------------|-----------------------------------------------------------------------------------------------------------------------------------------------------------------------------------------------------------------------------------------------------------------------------------------------------------------|-------------------------------|
| EPI_ISL_457972 | Laboratorio de Biología Molecular Asociación Española Primera en Salud           | Departments of Pathology and Medicine, New York University School of Medicine                                                                                                                                                                                                                                   | Maria Victoria Elizondo et al |
| EPI_ISL_480429 | Laboratorio de Biología Molecular Asociación Española Primera en Salud           | Departments of Pathology and Medicine, New York University School of Medicine                                                                                                                                                                                                                                   | Maria Victoria Elizondo et al |
| EPI_ISL_480432 | Laboratorio de Biología Molecular Asociación Española Primera en Salud           | Departments of Pathology and Medicine, New York University School of Medicine                                                                                                                                                                                                                                   | Maria Victoria Elizondo et al |
| EPI_ISL_480434 | Laboratorio de Biología Molecular Asociación Española Primera en Salud           | Departments of Pathology and Medicine, New York University School of Medicine                                                                                                                                                                                                                                   | Maria Victoria Elizondo et al |
| EPI_ISL_480435 | Laboratorio de Biología Molecular Asociación Española Primera en Salud           | Departments of Pathology and Medicine, New York University School of Medicine                                                                                                                                                                                                                                   | Maria Victoria Elizondo et al |
| EPI_ISL_480436 | Laboratorio de Biología Molecular Asociación Española Primera en Salud           | Departments of Pathology and Medicine, New York University School of Medicine                                                                                                                                                                                                                                   | Maria Victoria Elizondo et al |
| EPI_ISL_480437 | Laboratorio de Biología Molecular Asociación Española Primera en Salud           | Departments of Pathology and Medicine, New York University School of Medicine                                                                                                                                                                                                                                   | Maria Victoria Elizondo et al |
| EPI_ISL_850951 | National Institute for Viral Disease Control and Prevention, China CDC           | National Institute for Viral Disease Control and Prevention, China CDC                                                                                                                                                                                                                                          | Xiang Zhao et al              |
| EPI_ISL_476702 | Incubadora Venezolana de Ciencia, Venezuela                                      | Incubadora Venezolana de Ciencia, Venezuela / Instituto Nacional de Salud, Bogotá, Colombia / Grupo de Investigaciones Microbiológicas-UR (GIMUR), Departamento de Biología, Facultad de Ciencias Naturales, Universidad del Rosario, Bogotá, Colombia / Icahn School of Medicine at Mount Sinai, New York, USA | Alberto Paniz-Mondolfi et al  |
| EPI_ISL_476704 | Incubadora Venezolana de Ciencia, Venezuela                                      | Incubadora Venezolana de Ciencia, Venezuela / Instituto Nacional de Salud, Bogotá, Colombia / Grupo de Investigaciones Microbiológicas-UR (GIMUR), Departamento de Biología, Facultad de Ciencias Naturales, Universidad del Rosario, Bogotá, Colombia / Icahn School of Medicine at Mount Sinai, New York, USA | Alberto Paniz-Mondolfi et al  |
| EPI_ISL_418269 | Microbiology and Immunology department, Pasteur institute in Ho Chi Minh city    | Microbiology and Immunology department, Pasteur institute in Ho Chi Minh city                                                                                                                                                                                                                                   | Cao et al                     |
| EPI_ISL_418267 | Microbiology and Immunology department, Pasteur institute in Ho Chi Minh city    | Microbiology and Immunology department, Pasteur institute in Ho Chi Minh city                                                                                                                                                                                                                                   | Nguyen et al                  |
| EPI_ISL_654891 | Pasteur Institute in Ho Chi Minh city                                            | Department of Microbiology and Immunology - Pasteur Institute in Ho Chi Minh city                                                                                                                                                                                                                               | Đỗ Thái Hùng et al            |
| EPI_ISL_416427 | National Influenza Center, National Institute of Hygiene and Epidemiology (NIHE) | National Influenza Center, National Institute of Hygiene and Epidemiology (NIHE)                                                                                                                                                                                                                                | Le Quynh Mai et al            |
| EPI_ISL_660541 | National Influenza Center, National Institute of Hygiene and Epidemiology (NIHE) | National Influenza Center, National Institute of Hygiene and Epidemiology (NIHE)                                                                                                                                                                                                                                | Le Quynh Mai et al            |
| EPI_ISL_416429 | National Influenza Center, National Institute of Hygiene and Epidemiology (NIHE) | National Influenza Center, National Institute of Hygiene and Epidemiology (NIHE)                                                                                                                                                                                                                                | Le Quynh Mai et al            |
| EPI_ISL_450741 | OUCRU/HTD                                                                        | OUCRU/HTD                                                                                                                                                                                                                                                                                                       | Nguyen Van Vinh Chau et al    |
| EPI_ISL_654866 | Pasteur Institute in Ho Chi Minh city                                            | Department of Microbiology and Immunology - Pasteur Institute in Ho Chi Minh city                                                                                                                                                                                                                               | Cao Minh Thắng et al          |
| EPI_ISL_812922 | Pasteur Institute in Ho Chi Minh city                                            | Department of Microbiology and Immunology - Pasteur Institute in Ho Chi Minh city                                                                                                                                                                                                                               | Manh Huy Dao et al            |
| EPI_ISL_654878 | Pasteur Institute in Ho Chi Minh city                                            | Department of Microbiology and Immunology - Pasteur Institute in Ho Chi Minh city                                                                                                                                                                                                                               | Phạm Duy Quang et al          |
| EPI_ISL_654870 | Pasteur Institute in Ho Chi Minh city                                            | Department of Microbiology and Immunology - Pasteur Institute in Ho Chi Minh city                                                                                                                                                                                                                               | Trần Thị Hồng Kim et al       |
| EPI_ISL_654882 | Pasteur Institute in Ho Chi Minh city                                            | Department of Microbiology and Immunology - Pasteur Institute in Ho Chi Minh city                                                                                                                                                                                                                               | Lương Chấn Quang et al        |
| EPI_ISL_654883 | Pasteur Institute in Ho Chi Minh city                                            | Department of Microbiology and Immunology - Pasteur Institute in Ho Chi Minh city                                                                                                                                                                                                                               | Nguyễn Thanh Long et al       |

|                |                                                                                                                                         |                                                                                                                                                                                                                            |                          |
|----------------|-----------------------------------------------------------------------------------------------------------------------------------------|----------------------------------------------------------------------------------------------------------------------------------------------------------------------------------------------------------------------------|--------------------------|
| EPI_ISL_654881 | Pasteur Institute in Ho Chi Minh city                                                                                                   | Department of Microbiology and Immunology - Pasteur Institute in Ho Chi Minh city                                                                                                                                          | Luong Chấn Quang et al   |
| EPI_ISL_455707 | National Hospital of Tropical Diseases                                                                                                  | Oxford University Clinical Research Unit, Hanoi, Vietnam                                                                                                                                                                   | Nguyen Thi Tam et al     |
| EPI_ISL_455711 | National Hospital of Tropical Diseases                                                                                                  | Oxford University Clinical Research Unit, Hanoi, Vietnam                                                                                                                                                                   | Nguyen Thi Tam et al     |
| EPI_ISL_455709 | National Hospital of Tropical Diseases                                                                                                  | Oxford University Clinical Research Unit, Hanoi, Vietnam                                                                                                                                                                   | Nguyen Thi Tam et al     |
| EPI_ISL_455708 | National Hospital of Tropical Diseases                                                                                                  | Oxford University Clinical Research Unit, Hanoi, Vietnam                                                                                                                                                                   | Nguyen Thi Tam et al     |
| EPI_ISL_455710 | National Hospital of Tropical Diseases                                                                                                  | Oxford University Clinical Research Unit, Hanoi, Vietnam                                                                                                                                                                   | Nguyen Thi Tam et al     |
| EPI_ISL_455712 | National Hospital of Tropical Diseases                                                                                                  | Oxford University Clinical Research Unit, Hanoi, Vietnam                                                                                                                                                                   | Nguyen Thi Tam et al     |
| EPI_ISL_511898 | National Hospital of Tropical Diseases                                                                                                  | Oxford University Clinical Research Unit, Hanoi, Vietnam                                                                                                                                                                   | Nguyen Thi Tam et al     |
| EPI_ISL_408668 | National Influenza Center - National Institute of Hygiene and Epidemiology (NIHE)                                                       | National Influenza Center - National Institute of Hygiene and Epidemiology (NIHE)                                                                                                                                          | Ung Thi Hong Trang et al |
| EPI_ISL_493998 | Wales Specialist Virology Centre Sequencing lab: Pathogen Genomics Unit                                                                 | COVID-19 Genomics UK (COG-UK) Consortium                                                                                                                                                                                   | Catherine Moore et al    |
| EPI_ISL_494034 | Wales Specialist Virology Centre Sequencing lab: Pathogen Genomics Unit                                                                 | COVID-19 Genomics UK (COG-UK) Consortium                                                                                                                                                                                   | Catherine Moore et al    |
| EPI_ISL_499380 | Wales Specialist Virology Centre Sequencing lab: Pathogen Genomics Unit                                                                 | COVID-19 Genomics UK (COG-UK) Consortium                                                                                                                                                                                   | Catherine Moore et al    |
| EPI_ISL_573896 | Wales Specialist Virology Centre Sequencing lab: Pathogen Genomics Unit                                                                 | COVID-19 Genomics UK (COG-UK) Consortium                                                                                                                                                                                   | Catherine Moore et al    |
| EPI_ISL_665642 | Wales Specialist Virology Centre Sequencing lab: Pathogen Genomics Unit                                                                 | COVID-19 Genomics UK (COG-UK) Consortium                                                                                                                                                                                   | Catherine Moore et al    |
| EPI_ISL_454912 | Wuhan Chain Medical Labs (CMLabs)                                                                                                       | State Key Laboratory of Biotherapy of Sichuan University                                                                                                                                                                   | Baowen Du et al          |
| EPI_ISL_454933 | Wuhan Chain Medical Labs (CMLabs)                                                                                                       | State Key Laboratory of Biotherapy of Sichuan University                                                                                                                                                                   | Baowen Du et al          |
| EPI_ISL_454940 | Wuhan Chain Medical Labs (CMLabs)                                                                                                       | State Key Laboratory of Biotherapy of Sichuan University                                                                                                                                                                   | Baowen Du et al          |
| EPI_ISL_454955 | Wuhan Chain Medical Labs (CMLabs)                                                                                                       | State Key Laboratory of Biotherapy of Sichuan University                                                                                                                                                                   | Baowen Du et al          |
| EPI_ISL_454981 | Wuhan Chain Medical Labs (CMLabs)                                                                                                       | State Key Laboratory of Biotherapy of Sichuan University                                                                                                                                                                   | Baowen Du et al          |
| EPI_ISL_402125 | National Institute for Communicable Disease Control and Prevention (ICDC) Chinese Center for Disease Control and Prevention (China CDC) | National Institute for Communicable Disease Control and Prevention (ICDC) Chinese Center for Disease Control and Prevention (China CDC)                                                                                    | Zhang et al              |
| EPI_ISL_529214 | Beijing Institute of Microbiology and Epidemiology                                                                                      | Beijing Institute of Microbiology and Epidemiology                                                                                                                                                                         | Fan et al                |
| EPI_ISL_529216 | Beijing Institute of Microbiology and Epidemiology                                                                                      | Beijing Institute of Microbiology and Epidemiology                                                                                                                                                                         | Fan et al                |
| EPI_ISL_529217 | Beijing Institute of Microbiology and Epidemiology                                                                                      | Beijing Institute of Microbiology and Epidemiology                                                                                                                                                                         | Fan et al                |
| EPI_ISL_403929 | Institute of Pathogen Biology, Chinese Academy of Medical Sciences & Peking Union Medical College                                       | Institute of Pathogen Biology, Chinese Academy of Medical Sciences & Peking Union Medical College                                                                                                                          | Lili Ren et al           |
| EPI_ISL_402119 | National Institute for Viral Disease Control and Prevention, China CDC                                                                  | National Institute for Viral Disease Control and Prevention, China CDC                                                                                                                                                     | Wenjie Tan et al         |
| EPI_ISL_406798 | General Hospital of Central Theater Command of People's Liberation Army of China                                                        | BGI & Institute of Microbiology, Chinese Academy of Sciences & Shandong First Medical University & Shandong Academy of Medical Sciences & General Hospital of Central Theater Command of People's Liberation Army of China | Weijun Chen et al        |
| EPI_ISL_406800 | General Hospital of Central Theater Command of People's Liberation Army of China                                                        | BGI & Institute of Microbiology, Chinese Academy of Sciences & Shandong First Medical University & Shandong Academy of Medical Sciences & General Hospital of Central Theater Command of People's Liberation Army of China | Weijun Chen et al        |
| EPI_ISL_406716 | State Key Laboratory of Virology, Wuhan University                                                                                      | State Key Laboratory of Virology, Wuhan University                                                                                                                                                                         | Chen et al               |
| EPI_ISL_402129 | Wuhan Jinyintan Hospital                                                                                                                | Wuhan Institute of Virology, Chinese Academy of Sciences                                                                                                                                                                   | Peng Zhou et al          |





|                |                                                                                                                                                                            |                                                                                                         |                                 |
|----------------|----------------------------------------------------------------------------------------------------------------------------------------------------------------------------|---------------------------------------------------------------------------------------------------------|---------------------------------|
| EPI_ISL_977339 | University of Zambia, School of Veterinary Medicine                                                                                                                        | UNZAVET and PATH                                                                                        | Mulenga Mwenda-Chimfwembe et al |
| EPI_ISL_977340 | University of Zambia, School of Veterinary Medicine                                                                                                                        | UNZAVET and PATH                                                                                        | Mulenga Mwenda-Chimfwembe et al |
| EPI_ISL_977341 | University of Zambia, School of Veterinary Medicine                                                                                                                        | UNZAVET and PATH                                                                                        | Mulenga Mwenda-Chimfwembe et al |
| EPI_ISL_977287 | University of Zambia, School of Veterinary Medicine                                                                                                                        | UNZAVET and PATH                                                                                        | Mulenga Mwenda-Chimfwembe et al |
| EPI_ISL_977288 | University of Zambia, School of Veterinary Medicine                                                                                                                        | UNZAVET and PATH                                                                                        | Mulenga Mwenda-Chimfwembe et al |
| EPI_ISL_977274 | University of Zambia, School of Veterinary Medicine                                                                                                                        | UNZAVET and PATH                                                                                        | Mulenga Mwenda-Chimfwembe et al |
| EPI_ISL_977343 | University of Zambia, School of Veterinary Medicine                                                                                                                        | UNZAVET and PATH                                                                                        | Mulenga Mwenda-Chimfwembe et al |
| EPI_ISL_977345 | University of Zambia, School of Veterinary Medicine                                                                                                                        | UNZAVET and PATH                                                                                        | Mulenga Mwenda-Chimfwembe et al |
| EPI_ISL_977346 | University of Zambia, School of Veterinary Medicine                                                                                                                        | UNZAVET and PATH                                                                                        | Mulenga Mwenda-Chimfwembe et al |
| EPI_ISL_977292 | University of Zambia, School of Veterinary Medicine                                                                                                                        | UNZAVET and PATH                                                                                        | Mulenga Mwenda-Chimfwembe et al |
| EPI_ISL_977278 | University of Zambia, School of Veterinary Medicine                                                                                                                        | UNZAVET and PATH                                                                                        | Mulenga Mwenda-Chimfwembe et al |
| EPI_ISL_977347 | University of Zambia, School of Veterinary Medicine                                                                                                                        | UNZAVET and PATH                                                                                        | Mulenga Mwenda-Chimfwembe et al |
| EPI_ISL_977348 | University of Zambia, School of Veterinary Medicine                                                                                                                        | UNZAVET and PATH                                                                                        | Mulenga Mwenda-Chimfwembe et al |
| EPI_ISL_977349 | University of Zambia, School of Veterinary Medicine                                                                                                                        | UNZAVET and PATH                                                                                        | Mulenga Mwenda-Chimfwembe et al |
| EPI_ISL_977468 | University of Zambia, School of Veterinary Medicine                                                                                                                        | UNZAVET and PATH                                                                                        | Mulenga Mwenda-Chimfwembe et al |
| EPI_ISL_977270 | University of Zambia, School of Veterinary Medicine                                                                                                                        | UNZAVET and PATH                                                                                        | Mulenga Mwenda-Chimfwembe et al |
| EPI_ISL_977469 | University of Zambia, School of Veterinary Medicine                                                                                                                        | UNZAVET and PATH                                                                                        | Mulenga Mwenda-Chimfwembe et al |
| EPI_ISL_977470 | University of Zambia, School of Veterinary Medicine                                                                                                                        | UNZAVET and PATH                                                                                        | Mulenga Mwenda-Chimfwembe et al |
| EPI_ISL_977354 | University of Zambia, School of Veterinary Medicine                                                                                                                        | UNZAVET and PATH                                                                                        | Mulenga Mwenda-Chimfwembe et al |
| EPI_ISL_455689 | unknown                                                                                                                                                                    | Department of Microbiology                                                                              | Gao et al                       |
| EPI_ISL_497950 | Shaoxing CDC                                                                                                                                                               | Zhejiang Provincial Center for Disease Control and Prevention                                           | Yin Chen et al                  |
| EPI_ISL_647971 | National Microbiology Reference Laboratory                                                                                                                                 | Quadram Institute Bioscience                                                                            | Thanh Le Viet et al             |
| EPI_ISL_647977 | National Microbiology Reference Laboratory                                                                                                                                 | Quadram Institute Bioscience                                                                            | Thanh Le Viet et al             |
| EPI_ISL_647978 | National Microbiology Reference Laboratory                                                                                                                                 | Quadram Institute Bioscience                                                                            | Thanh Le Viet et al             |
| EPI_ISL_647980 | National Microbiology Reference Laboratory                                                                                                                                 | Quadram Institute Bioscience                                                                            | Thanh Le Viet et al             |
| EPI_ISL_717979 | Laboratory of Microbiology and Infectious Diseases, Faculty of Veterinary Medicine, Aristotle University of Thessaloniki, University Campus, 541 24, Thessaloniki, Greece. | Laboratory of Biology, Department of Medicine, Democritus University of Thrace, Alexandroupolis, Greece | Dovrolis N. et al               |
| EPI_ISL_934633 | Department of Microbiology, University Innsbruck                                                                                                                           | Bergthaler laboratory, CeMM Research Center for Molecular Medicine of the Austrian Academy of Sciences  | Lukas Endler et al              |
| EPI_ISL_934636 | Department of Microbiology, University Innsbruck                                                                                                                           | Bergthaler laboratory, CeMM Research Center for Molecular Medicine of the Austrian Academy of Sciences  | Lukas Endler et al              |
| EPI_ISL_934638 | Department of Microbiology, University Innsbruck                                                                                                                           | Bergthaler laboratory, CeMM Research Center for Molecular Medicine of the Austrian Academy of Sciences  | Lukas Endler et al              |
| EPI_ISL_934644 | Department of Microbiology, University Innsbruck                                                                                                                           | Bergthaler laboratory, CeMM Research Center for Molecular Medicine of the Austrian Academy of Sciences  | Lukas Endler et al              |
| EPI_ISL_934646 | Department of Microbiology, University Innsbruck                                                                                                                           | Bergthaler laboratory, CeMM Research Center for Molecular Medicine of the Austrian Academy of Sciences  | Lukas Endler et al              |
| EPI_ISL_934647 | Department of Microbiology, University Innsbruck                                                                                                                           | Bergthaler laboratory, CeMM Research Center for Molecular Medicine of the Austrian Academy of Sciences  | Lukas Endler et al              |
| EPI_ISL_469256 | National Institute for Viral Disease Control and Prevention, China CDC                                                                                                     | National Institute for Viral Disease Control and Prevention, China CDC                                  | Xiang Zhao et al                |
| EPI_ISL_541397 | Laboratório de Virologia Comparada e Ambiental- LVCA-IOC                                                                                                                   | Laboratory of Respiratory Viruses and Measles, Oswaldo Cruz Institute, FIOCRUZ                          | Paola Resende et al             |

|                |                                                                                                          |                                                                                    |                              |
|----------------|----------------------------------------------------------------------------------------------------------|------------------------------------------------------------------------------------|------------------------------|
| EPI_ISL_541398 | Laboratório de Virologia Comparada e Ambiental- LVCA-IOC                                                 | Laboratory of Respiratory Viruses and Measles, Oswaldo Cruz Institute, FIOCRUZ     | Paola Resende et al          |
| EPI_ISL_541399 | Laboratório de Virologia Comparada e Ambiental- LVCA-IOC                                                 | Laboratory of Respiratory Viruses and Measles, Oswaldo Cruz Institute, FIOCRUZ     | Paola Resende et al          |
| EPI_ISL_733568 | Centre for Health Protection                                                                             | Hong Kong Department of Health                                                     | Alan K.L. Tsang et al        |
| EPI_ISL_591279 | National Institute for Viral Disease Control and Prevention, China CDC                                   | National Institute for Viral Disease Control and Prevention, China CDC             | Huilai Ma et al              |
| EPI_ISL_591280 | National Institute for Viral Disease Control and Prevention, China CDC                                   | National Institute for Viral Disease Control and Prevention, China CDC             | Huilai Ma et al              |
| EPI_ISL_591272 | National Institute for Viral Disease Control and Prevention, China CDC                                   | National Institute for Viral Disease Control and Prevention, China CDC             | Huilai Ma et al              |
| EPI_ISL_591273 | National Institute for Viral Disease Control and Prevention, China CDC                                   | National Institute for Viral Disease Control and Prevention, China CDC             | Huilai Ma et al              |
| EPI_ISL_591274 | National Institute for Viral Disease Control and Prevention, China CDC                                   | National Institute for Viral Disease Control and Prevention, China CDC             | Huilai Ma et al              |
| EPI_ISL_591275 | National Institute for Viral Disease Control and Prevention, China CDC                                   | National Institute for Viral Disease Control and Prevention, China CDC             | Huilai Ma et al              |
| EPI_ISL_591276 | National Institute for Viral Disease Control and Prevention, China CDC                                   | National Institute for Viral Disease Control and Prevention, China CDC             | Huilai Ma et al              |
| EPI_ISL_591277 | National Institute for Viral Disease Control and Prevention, China CDC                                   | National Institute for Viral Disease Control and Prevention, China CDC             | Huilai Ma et al              |
| EPI_ISL_591278 | National Institute for Viral Disease Control and Prevention, China CDC                                   | National Institute for Viral Disease Control and Prevention, China CDC             | Huilai Ma et al              |
| EPI_ISL_626346 | Statens Serum Institute                                                                                  | Statens Serum Institute                                                            | Hammer et al                 |
| EPI_ISL_626340 | Statens Serum Institute                                                                                  | Statens Serum Institute                                                            | Hammer et al                 |
| EPI_ISL_626341 | Statens Serum Institute                                                                                  | Statens Serum Institute                                                            | Hammer et al                 |
| EPI_ISL_626345 | Statens Serum Institute                                                                                  | Statens Serum Institute                                                            | Hammer et al                 |
| EPI_ISL_626347 | Statens Serum Institute                                                                                  | Statens Serum Institute                                                            | Hammer et al                 |
| EPI_ISL_626342 | Statens Serum Institute                                                                                  | Statens Serum Institute                                                            | Hammer et al                 |
| EPI_ISL_626348 | Statens Serum Institute                                                                                  | Statens Serum Institute                                                            | Hammer et al                 |
| EPI_ISL_626349 | Statens Serum Institute                                                                                  | Statens Serum Institute                                                            | Hammer et al                 |
| EPI_ISL_626350 | Statens Serum Institute                                                                                  | Statens Serum Institute                                                            | Hammer et al                 |
| EPI_ISL_626351 | Statens Serum Institute                                                                                  | Statens Serum Institute                                                            | Hammer et al                 |
| EPI_ISL_641506 | Department of Virus and Microbiological Special Diagnostics, Statens Serum Institut, Copenhagen, Denmark | Albertsen lab, Department of Chemistry and Bioscience, Aalborg University, Denmark | Thomas Bruun Rasmussen et al |
| EPI_ISL_641508 | Department of Virus and Microbiological Special Diagnostics, Statens Serum Institut, Copenhagen, Denmark | Albertsen lab, Department of Chemistry and Bioscience, Aalborg University, Denmark | Thomas Bruun Rasmussen et al |
| EPI_ISL_641462 | Department of Virus and Microbiological Special Diagnostics, Statens Serum Institut, Copenhagen, Denmark | Albertsen lab, Department of Chemistry and Bioscience, Aalborg University, Denmark | Thomas Bruun Rasmussen et al |
| EPI_ISL_523074 | Dutch COVID-19 response team                                                                             | Erasmus Medical Center                                                             | OH consortium et al          |
| EPI_ISL_732952 | Department of Tropical Parasitology                                                                      | Laboratory of Recombinant Vaccines                                                 | Lukasz Rabalski et al        |
| EPI_ISL_732953 | Department of Tropical Parasitology                                                                      | Laboratory of Recombinant Vaccines                                                 | Lukasz Rabalski et al        |
| EPI_ISL_732949 | Department of Tropical Parasitology                                                                      | Laboratory of Recombinant Vaccines                                                 | Lukasz Rabalski et al        |
| EPI_ISL_732956 | Department of Tropical Parasitology                                                                      | Laboratory of Recombinant Vaccines                                                 | Lukasz Rabalski et al        |
| EPI_ISL_732959 | Department of Tropical Parasitology                                                                      | Laboratory of Recombinant Vaccines                                                 | Lukasz Rabalski et al        |

All submitters of data may be contacted directly via [www.gisaid.org](http://www.gisaid.org)

Shu, Y., McCauley, J. (2017) GISAID: from vision to reality EuroSurveillance 22(13) doi:10.2807/1560-7917.ES.2017.22.13.30494 PMID: PMC5388101
